# Supplementary material
Source: publisher figshare collection journal article supplement (https://gsajournals.figshare.com/articles/dataset/_/11317307)
Supplement: Supplementary file 1 [file 1]

Archive with 17 entries (17 files):
- Table_S9_Tudor_G3_afterReview_trackedchange.docx
- TableS8_DGRP2Top100.xlsx
- TableS7_RankTransformedRemating.xlsx
- TableS6_GeneLists.xlsx
- TableS5_ANOVA_TukeyHSD_Results.xlsx
- TableS4_GOresults.xlsx
- TableS3_PrimerSequences.docx
- TableS2_FullResults.xlsx
- TableS1_PublicationSummary.xlsx
- FigureS7_GWAS_QQ_LD.pdf
- FigureS6_Sleep.pdf
- FigureS5_GeneOverlap.pdf
- FigureS4_qRTPCR.pdf
- FigureS3_Correlations.pdf
- FigureS2_PCA.pdf
- Figure S1_FlyHormoneAxis.pdf
- List_of_Supplemental_Files.docx
