# Supplementary material
Source: publisher figshare collection journal article supplement (https://gsajournals.figshare.com/articles/dataset/_/11317307)
Supplement: Supplementary file 1 [file 1 › Figure S1_FlyHormoneAxis.pdf]

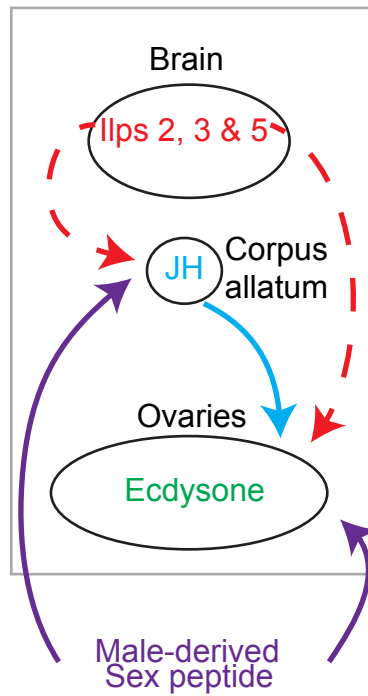

**Figure S1. Diagram of the adult *Drosophila* endocrine network**

A) Juvenile hormone (JH, blue), produced in the corpus allatum, stimulates production of ecdysone (green) and uptake of yolk proteins (not shown) in the ovaries. JH and ecdysone are regulated through signaling via the insulin/insulin-like signaling pathway likely through the Insulin-like peptides 2, 3, and 5 (Ilps2,3, and 5, red). Production of JH and ecdysone is also stimulated by male derived sex peptide (SP, purple).
