# Supplementary material
Source: publisher figshare collection journal article supplement (https://gsajournals.figshare.com/articles/dataset/_/11317307)
Supplement: Supplementary file 1 [file 1 › FigureS2_PCA.pdf]

## Principal component analysis (PCA)

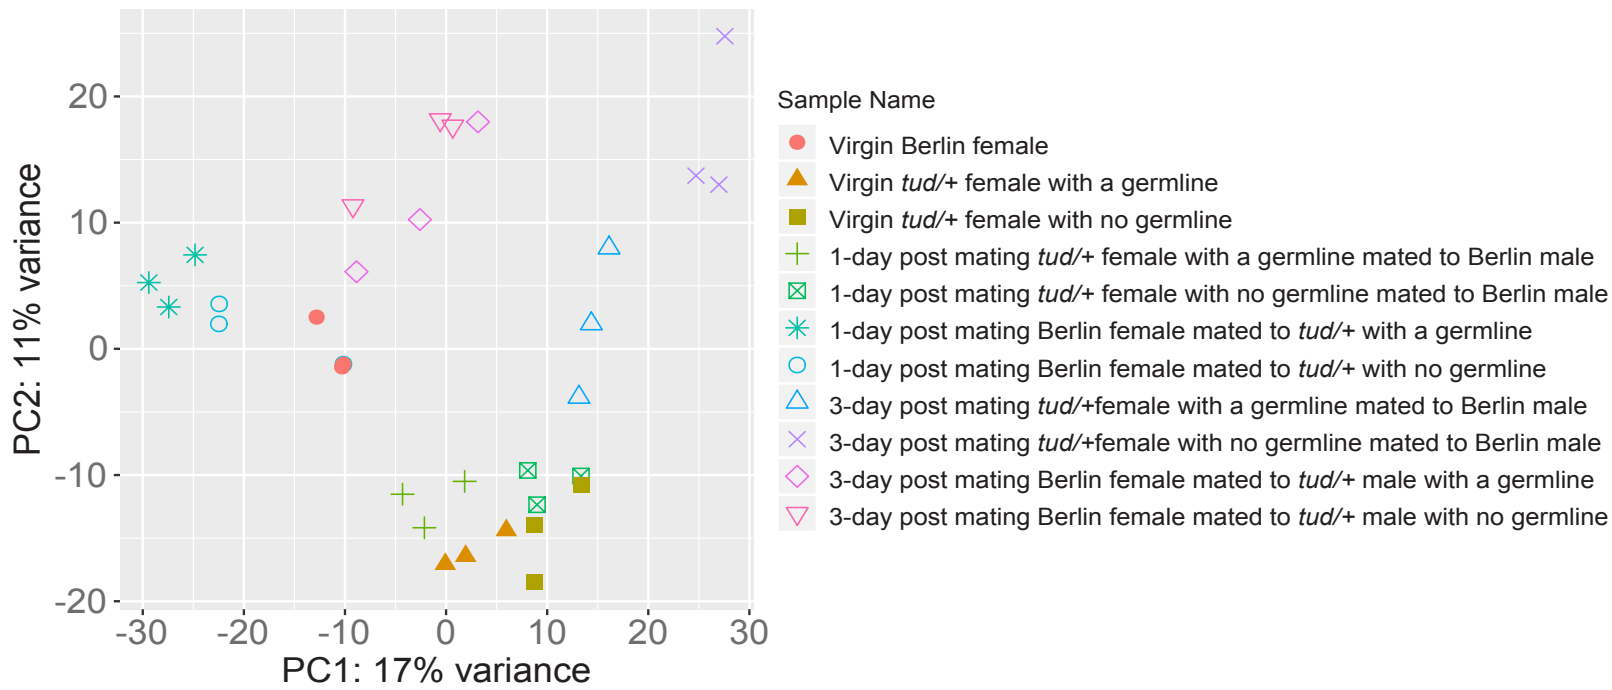

**Figure S2: PCA plot for each replicate in each condition.** The variance explained by component 1 is on the x-axis and component 2 is on the y-axis. Analysis was done using the online tool iDEP82 (<http://bioinformatics.sdstate.edu/idep/>), using gene expression data from all genes.
