# Supplementary material
Source: publisher figshare collection journal article supplement (https://gsajournals.figshare.com/articles/dataset/_/11317307)
Supplement: Supplementary file 1 [file 1 › FigureS4_qRTPCR.pdf]

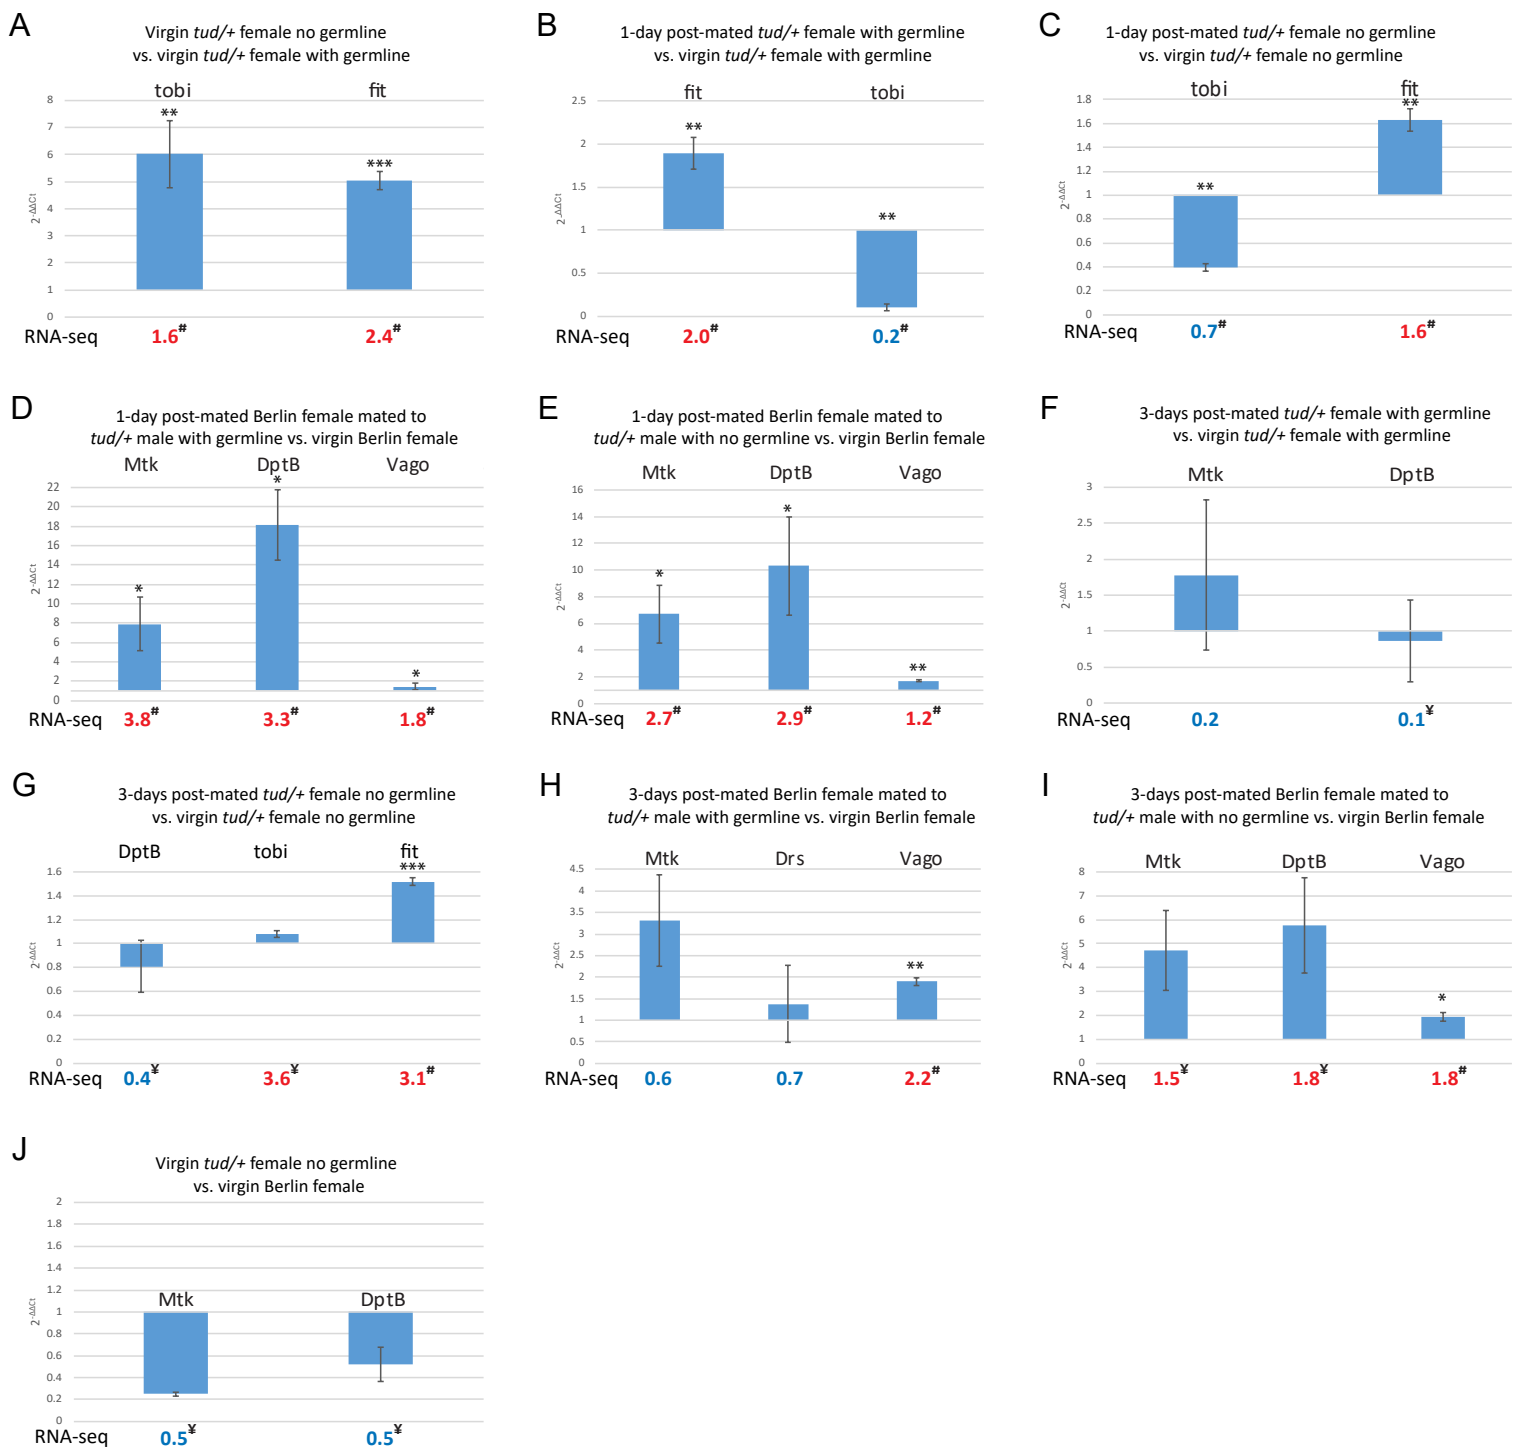

**Figure S4: Relative quantification plots using qRT-PCR for each comparison.**  $2^{-\Delta\Delta C_t}$  is plotted on the y-axis with the gene tested on the x-axis for each comparison. Error bars represent the standard error of the mean. Beneath each chart is the fold change from the RNA-seq results for that gene for that comparison, with red indicating increased expression in the first condition compared to the second, and blue indicating decreased expression. RNA-seq values marked with a # indicate the qRT-PCR results are significant (Student's t-test, \* =  $P < 0.05$ , \*\* =  $P < 0.005$ , \*\*\* =  $P < 0.0005$ ) and the direction of change matches the RNA-seq results. ¥ indicates the qRT-PCR results were not significant but the direction of change matches the RNA-seq results. *Mtk* and *Drs* did not match the RNA-seq results in two conditions (H and F); these genes are immune response genes and thus it is possible there is an interaction between infection and post-mating response, where there may have been an infection when we collected for RNA-seq or qRT-PCR. All other tests confirm the RNA-seq results.
