# Supplementary material
Source: publisher figshare collection journal article supplement (https://gsajournals.figshare.com/articles/dataset/_/11317307)
Supplement: Supplementary file 1 [file 1 › FigureS7_GWAS_QQ_LD.pdf]

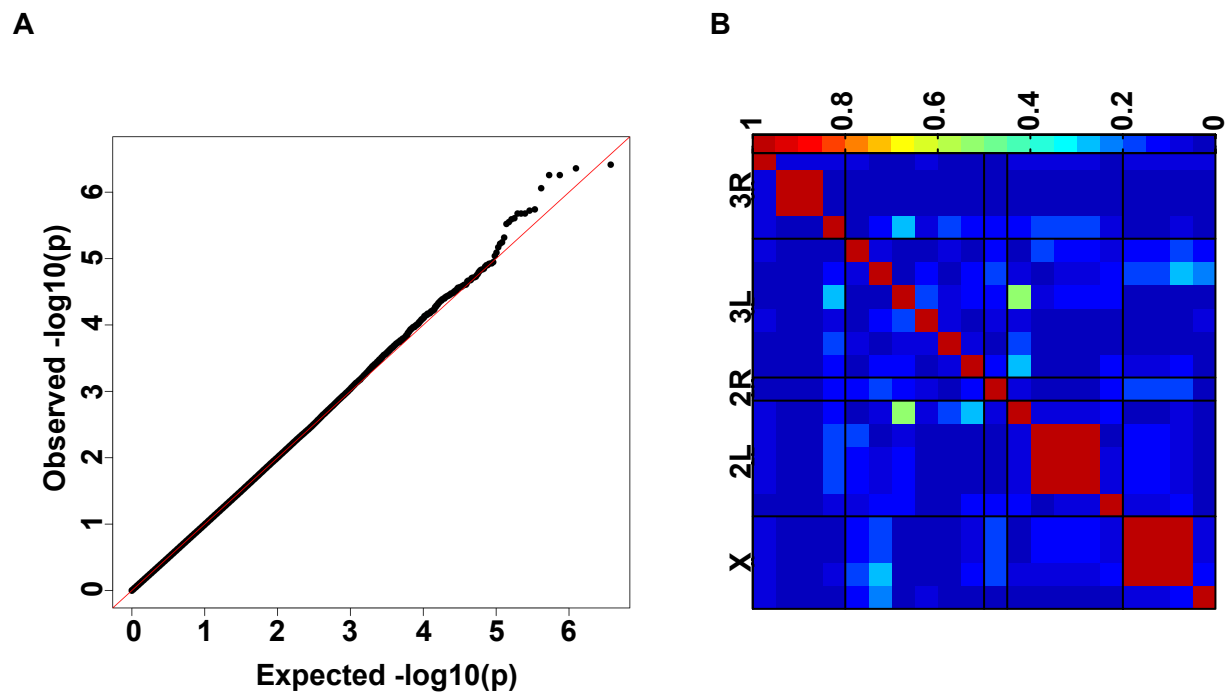

**Figure S7: Genome wide association using the online DGRP2 tool.** (A) Q-Q plot of associated p-values and (B) linkage disequilibrium heatmap of top associations generated using using the DGRP2 online tool.
