# Supplementary material
Source: publisher figshare collection journal article supplement (https://gsajournals.figshare.com/articles/dataset/_/11317307)
Supplement: Supplementary file 1 [file 1 › TableS2_FullResults.xlsx]

## Sheet: ReadMe
Abbreviations:
Vber	Virgin Berlin female
VFG	Virgin female with a germline (tud/+)
VFN	Virgin female without a germline (tud/+)
1MG	Berlin female mated to a male with a germline (tud/+) (1 day post-mating)
1MN	Berlin female mated to a male without a germline (tud/+) (1 day post-mating)
1FG	Female with a germline (tud/+) mated to Berlin male (1 day post-mating)
1FN	Female without a germline (tud/+) mated to a Berlin male (1 day post-mating)
3MG	Berlin female mated to a male with a germline (tud/+) (3 days post-mating)
3MN	Berlin female mated to a male without a germline (tud/+) (3 days post-mating)
3FG	Female with a germline (tud/+) mated to Berlin male (3 days post-mating)
3FN	Female without a germline (tud/+) mated to a Berlin male (3 days post-mating)
Column Header	Description
Gene	Flybase Gene ID
Symbol	Gene Symbol
Chr	Chromosome
Position	Chromosome position
Vber Rep 1	Normalized reads for Vber replicate 1
Vber Rep 2	Normalized reads for Vber replicate 2
Vber Rep 3	Normalized reads for Vber replicate 3
Vber_Mean	Average normalized reads for Vber
VFG Rep 1	Normalized reads for VFG replicate 1
VFG Rep 2	Normalized reads for VFG replicate 2
VFG Rep 3	Normalized reads for VFG replicate 3
VFG_Mean	Average normalized reads for VFG
VFN Rep 1	Normalized reads for VFN replicate 1
VFN Rep 2	Normalized reads for VFN replicate 2
VFN Rep 3	Normalized reads for VFN replicate 3
VFN_Mean	Average normalized reads for VFN
1FG Rep 1	Normalized reads for 1FG replicate 1
1FG Rep 2	Normalized reads for 1FG replicate 2
1FG Rep 3	Normalized reads for 1FG replicate 3
1FG_Mean	Average normalized reads for 1FG
1FN Rep 1	Normalized reads for 1FN replicate 1
1FN Rep 2	Normalized reads for 1FN replicate 2
1FN Rep 3	Normalized reads for 1FN replicate 3
1FN_Mean	Average normalized reads for 1FN
1MG Rep 1	Normalized reads for 1MG replicate 1
1MG Rep 2	Normalized reads for 1MG replicate 2
1MG Rep 3	Normalized reads for 1MG replicate 3
1MG_Mean	Average normalized reads for 1MG
1MN Rep 1	Normalized reads for 1MN replicate 1
1MN Rep 2	Normalized reads for 1MN replicate 2
1MN Rep 3	Normalized reads for 1MN replicate 3
1MN_Mean	Average normalized reads for 1MN
3FG Rep 1	Normalized reads for 3FG replicate 1
3FG Rep 2	Normalized reads for 3FG replicate 2
3FG Rep 3	Normalized reads for 3FG replicate 3
3FG_Mean	Average normalized reads for 3FG
3FN Rep 1	Normalized reads for 3FN replicate 1
3FN Rep 2	Normalized reads for 3FN replicate 2
3FN Rep 3	Normalized reads for 3FN replicate 3
3FN_Mean	Average normalized reads for 3FN
3MG Rep 1	Normalized reads for 3MG replicate 1
3MG Rep 2	Normalized reads for 3MG replicate 2
3MG Rep 3	Normalized reads for 3MG replicate 3
3MG_Mean	Average normalized reads for 3MG
3MN Rep 1	Normalized reads for 3MN replicate 1
3MN Rep 2	Normalized reads for 3MN replicate 2
3MN Rep 3	Normalized reads for 3MN replicate 3
3MN_Mean	Average normalized reads for 3MN
VFN_VFG_pValue	Raw p-value for VFN vs. VFG comparison
VFN_VFG_FDR	FDR corrected p-value for VFN vs. VFG comparison
VFN_VFG_Filter	1=normalized reads>1 in at least 2/3 reps for one condition
VFN_VFG_Fold_Change	VFN/VFG based on average normalized reads
VFG_Vber_pValue	Raw p-value for VFG vs. VBer comparison
VFG_Vber_FDR	FDR corrected p-value for VFG vs. VBer comparison
VFG_Vber_Filter	1=normalized reads>1 in at least 2/3 reps for one condition
VFG_Vber_Fold_Change	VFG/Vber based on average normalized reads
1MG_Vber_pValue	Raw p-value for 1MG vs. Vber comparison
1MG_Vber_FDR	FDR corrected p-value for 1MG vs. Vber comparison
1MG_Vber_Filter	1=normalized reads>1 in at least 2/3 reps for one condition
1MG_Vber_Fold_Change	1MG/Vber based on average normalized reads
1MN_Vber_pValue	Raw p-value for 1MN vs. Vber comparison
1MN_Vber_FDR	FDR corrected p-value for 1MN vs. Vber comparison
1MN_Vber_Filter	1=normalized reads>1 in at least 2/3 reps for one condition
1MN_Vber_Fold_Change	1MN/Vber based on average normalized reads
1MN_1MG_pValue	Raw p-value for 1MN vs. 1MG comparison
1MN_1MG_FDR	FDR corrected p-value for 1MN vs. 1MG comparison
1MN_1MG_Filter	1=normalized reads>1 in at least 2/3 reps for one condition
1MN_1MG_Fold_change	1MN/1MG based on average normalized reads
1FG_VFG_pValue	Raw p-value for 1FG vs. VFG comparison
1FG_VFG_FDR	FDR corrected p-value for 1FG vs. VFG comparison
1FG_VFG_Filter	1=normalized reads>1 in at least 2/3 reps for one condition
1FG_VFG_Fold_Change	1FG/VFG based on average normalized reads
1FN_VFN_pValue	Raw p-value for 1FN vs. VFN comparison
1FN_VFN_FDR	FDR corrected p-value for 1FN vs. VFN comparison
1FN_VFN_Filter	1=normalized reads>1 in at least 2/3 reps for one condition
1FN_VFN_Fold_Change	1FN/VFN based on average normalized reads
1FN_1FG_pValue	Raw p-value for 1FN vs. 1FG comparison
1FN_1FG_FDR	FDR corrected p-value for 1FN vs. 1FG comparison
1FN_1FG_Filter	1=normalized reads>1 in at least 2/3 reps for one condition
1FN_1FG_Fold_Change	1FN/1FG based on average normalized reads
3MG_Vber_pValue	Raw p-value for 3MG vs. Vber comparison
3MG_Vber_FDR	FDR corrected p-value for 3MG vs. Vber comparison
3MG_Vber_Filter	1=normalized reads>1 in at least 2/3 reps for one condition
3MG_Vber_Fold_Change	3MG/Vber based on average normalized reads
3MN_Vber_pValue	Raw p-value for 3MN vs. Vber comparison
3MN_Vber_FDR	FDR corrected p-value for 3MN vs. Vber comparison
3MN_Vber_Filter	1=normalized reads>1 in at least 2/3 reps for one condition
3MN_Vber_Fold_Change	3MN/Vber based on average normalized reads
3MN_3MG_pValue	Raw p-value for 3MN vs. 3MG comparison
3MN_3MG_FDR	FDR corrected p-value for 3MN vs. 3MG comparison
3MN_3MG_Filter	1=normalized reads>1 in at least 2/3 reps for one condition
3MN_3MG_Fold_Change	3MN/3MG based on average normalized reads
3FG_VFG_pValue	Raw p-value for 3FG vs. VFG comparison
3FG_VFG_FDR	FDR corrected p-value for 3FG vs. VFG comparison
3FG_VFG_Filter	1=normalized reads>1 in at least 2/3 reps for one condition
3FG_VFG_Fold_Change	3FG/VFG based on average normalized reads
3FN_VFN_pValue	Raw p-value for 3FN vs. VFN comparison
3FN_VFN_FDR	FDR corrected p-value for 3FN vs. VFN comparison
3FN_VFN_Filter	1=normalized reads>1 in at least 2/3 reps for one condition
3FN_VFN_Fold_Change	3FN/VFN based on average normalized reads
3FN_3FG_pValue	Raw p-value for 3FN vs. 3FG comparison
3FN_3FG_FDR	FDR corrected p-value for 3FN vs. 3FG comparison
3FN_3FG_Filter	1=normalized reads>1 in at least 2/3 reps for one condition
3FN_3FG_Fold_Change	3FN/3FG based on average normalized reads

## Sheet: Table S2_FullResults
Gene	Symbol	Chr	Position	Vber Rep 1	Vber Rep 2	Vber Rep 3	VBer Mean	VFG Rep 1	VFG Rep 2	VFG Rep 3	VFG Mean	VFN Rep 1	VFN Rep 2	VFN Rep 3	VFN Mean	1FG Rep 1	1FG Rep 2	1FG Rep 3	1FG Mean	1FN Rep 1	1FN Rep 2	1FN Rep 3	1FN Mean	1MG Rep 1	1MG Rep 2	1MG Rep 3	1MG Mean	1MN Rep 1	1MN Rep 2	1MN Rep 3	1MN Mean	3FG Rep 1	3FG Rep 2	3FG Rep 3	3FG Mean	3FN Rep 1	3FN Rep 2	3FN Rep 3	3FN Mean	3MG Rep 1	3MG Rep 2	3MG Rep 3	3MG Mean	3MN Rep 1	3MN Rep 2	3MN Rep 3	3MN Mean	VFN_VFG_pValue	VFN_VFG_FDR
FBgn0000003	7SLRNA:CR32864	3R	2648220	781.227	1260.64	1256.57	1099.48	1088.57	1340.81	1238.64	1222.67	1335.85	1456.23	1669.92	1487.33	886.451	1214.96	1175.88	1092.43	1650.39	1532.42	1406.43	1529.75	727.632	897.342	789.506	804.827	1256.57	822.003	840.322	972.965	952.043	914.842	857.046	907.977	1705.22	1294.58	1089.95	1363.25	753.648	1553.2	826.68	1044.51	779.889	1034.3	1073.39	962.526	0.00202079	0.137782
FBgn0000008	a	2R	18024494	4.48703	4.69243	4.09622	4.42523	3.94496	3.69759	4.22634	3.9563	4.34545	4.71041	4.28925	4.44837	4.70072	3.75172	4.51582	4.32275	3.77662	4.26009	4.41773	4.15148	6.46176	4.75858	3.30348	4.84127	4.09622	5.37702	4.89485	4.78936	4.84959	4.1829	3.84407	4.29219	4.08689	4.53212	4.14857	4.25586	5.19317	4.13095	5.09289	4.80567	4.29344	3.57162	4.91665	4.26057	0.380677	1
FBgn0000014	abd-A	3R	12632936	0	0	0.0725606	0.0241869	0	0	0.0632009	0.021067	0	0	0	0	0	0	0	0	0	0.0305841	0	0.0101947	0	0	0	0	0.0725606	0	0	0.0241869	0	0	0	0	0	0	0	0	0	0	0	0	0	0	0	0	1	1
FBgn0000015	Abd-B	3R	12752932	0.265908	0.103677	0.250178	0.206588	0.0604879	0.143506	0.140856	0.11495	0	0	0	0	0	0.024815	0.027742	0.017519	0.0222144	0.0254927	0	0.0159024	0	0	0	0	0.250178	0.0602299	0	0.103469	0	0	0.0312574	0.0104191	0	0	0	0	0.0342292	0	0	0.0114097	0.0675079	0.0720849	0.0665626	0.0687185	0.0662067	1
FBgn0000017	Abl	3L	16615470	12.6011	15.0715	14.1687	13.9471	16.3722	19.4746	14.6923	16.8464	14.3212	17.4691	12.8489	14.8797	15.6389	14.6151	15.4502	15.2347	14.5035	15.1969	14.8744	14.8583	18.023	15.7147	15.7377	16.4918	14.1687	15.6849	13.7003	14.518	10.794	12.4609	11.0457	11.4335	9.07741	9.80068	9.95809	9.61206	12.6341	11.2171	14.5504	12.8005	10.8233	9.46034	11.8559	10.7132	0.361539	1
FBgn0000018	abo	2L	10973443	3.61267	2.52064	2.804	2.9791	4.20476	2.68577	3.75144	3.54732	3.20446	4.53346	3.34895	3.69562	2.64492	3.58268	2.44198	2.88986	2.31632	2.72631	1.37933	2.14065	3.1717	2.47601	3.28833	2.97868	2.804	3.5202	1.90568	2.74329	3.26808	3.37227	3.34281	3.32772	3.92444	2.72745	3.91906	3.52365	3.56912	3.51874	2.74408	3.27731	3.47564	2.98965	4.75968	3.74166	0.876501	1
FBgn0000022	ac	X	264064	0	0	0	0	0	0	0	0	0	0	0	0	0	0	0	0	0	0	0	0	0	0	0	0	0	0	0	0	0	0	0	0	0	0	0	0	0	0	0	0	0	0	0	0	1	1
FBgn0000024	Ace	3R	9053964	23.9315	27.5205	27.4319	26.2946	33.8226	32.3213	27.5112	31.2184	25.7087	33.3771	29.4848	29.5235	30.3802	29.7571	30.1927	30.11	28.7085	30.8391	32.1817	30.5764	27.5955	25.8385	28.8574	27.4305	27.4319	29.706	27.7013	28.2797	25.8126	28.0649	28.125	27.3342	20.0795	24.8034	22.708	22.5303	29.7636	23.0828	33.2471	28.6978	23.649	21.5564	26.6165	23.9406	0.7318	1
FBgn0000028	acj6	X	15245315	4.43049	4.70301	4.59516	4.57622	5.58487	4.56223	4.19679	4.7813	4.00108	4.99887	4.0973	4.36575	4.10305	3.85461	4.44859	4.13542	3.52514	4.19158	4.86017	4.1923	6.0426	4.8986	5.49372	5.47831	4.59516	4.99818	5.00877	4.86737	2.98864	3.61944	2.71429	3.10746	2.43584	2.74891	3.19839	2.79438	3.99252	2.77687	4.72048	3.82996	3.37449	2.11581	4.53627	3.34219	0.657509	1
FBgn0000032	Acph-1	3R	25816861	5.72594	7.12394	5.59737	6.14908	4.42738	7.35273	5.30627	5.69546	6.82321	4.3025	7.44093	6.18888	6.39893	5.08574	6.43208	5.97225	5.81982	4.9136	6.78657	5.84	6.75347	5.08385	4.4013	5.41287	5.59737	5.73637	3.60227	4.97867	6.93384	5.93622	5.21081	6.02696	4.98567	6.33549	5.27511	5.53209	5.42841	6.83374	6.04443	6.10219	6.08658	4.74432	4.43033	5.08708	0.360008	1
FBgn0000036	nAcRalpha-96Aa	3R	20226948	9.43183	10.0847	11.9195	10.4787	10.5032	15.1081	10.8392	12.1502	11.7051	11.499	9.23319	10.8124	9.90843	9.39816	9.39435	9.56698	9.50664	9.55025	10.2111	9.756	13.6966	9.70753	12.6681	12.0241	11.9195	10.8011	11.6248	11.4485	8.23092	8.98573	10.556	9.25755	6.68969	7.05845	6.46339	6.73718	11.8404	9.08946	9.72624	10.2187	7.25771	6.37906	9.97956	7.87211	0.340086	1
FBgn0000037	mAcR-60C	2R	20266159	11.2859	12.1013	10.6621	11.3498	12.0699	14.3188	10.2985	12.2291	9.00065	14.4234	12.6128	12.0123	11.4093	10.3423	10.5641	10.7719	10.1992	10.6148	11.9339	10.916	12.7604	11.5947	11.3113	11.8888	10.6621	14.0516	12.2786	12.3308	8.24736	10.3453	9.44259	9.34508	7.52989	7.97186	7.83352	7.77842	11.4131	8.51896	12.7918	10.908	9.18911	7.94164	11.0419	9.39088	0.819057	1
FBgn0000038	nAcRbeta-64B	3L	4429370	74.2935	93.0277	74.1986	80.5066	90.896	99.3426	71.1838	87.1408	64.1009	89.4168	92.509	82.0089	93.2951	78.2748	75.7643	82.4447	79.7544	77.8379	87.6326	81.7416	99.9952	76.287	84.4798	86.9207	74.1986	95.5371	86.6779	85.4712	63.7065	75.6242	81.0703	73.467	41.0659	61.5168	58.0425	53.5417	93.6985	61.8179	101.944	85.8201	67.8083	56.622	75.5739	66.6681	0.68652	1
FBgn0000039	nAcRalpha-96Ab	3R	20311164	5.63196	7.44384	5.77847	6.28476	8.0268	7.02085	5.47216	6.83994	5.57561	5.95011	5.92116	5.81563	7.43168	6.28412	6.2999	6.6719	5.63952	7.24113	5.89904	6.2599	6.57422	10.2531	6.50511	7.77748	5.77847	6.14861	7.09058	6.33922	7.31113	7.05674	5.78325	6.71704	5.5387	4.4992	6.23273	5.42354	7.93854	6.80573	7.84358	7.52928	6.27203	5.16123	8.25125	6.5615	0.913248	1
FBgn0000042	Act5C	X	5794897	306.401	307.775	309.199	307.792	312.561	325.836	304.706	314.368	287.41	317.78	293.058	299.416	289.013	278.24	300.066	289.106	220.914	225.567	247.759	231.413	344.377	337.181	381.655	354.404	309.199	303.562	309.366	307.376	286.748	272.594	278.089	279.144	247.885	218.779	206.63	224.431	280.979	274.597	289.691	281.756	298.234	315.751	365.529	326.505	0.920942	1
FBgn0000043	Act42A	2R	1901415	9.1502	12.3248	15.5255	12.3335	14.5039	13.6382	11.2832	13.1418	9.67978	11.1066	8.59958	9.79532	12.8493	12.6986	11.1082	12.2187	8.37965	12.3744	10.4165	10.3902	18.5009	11.9605	13.9064	14.7893	15.5255	12.2378	12.9522	13.5718	11.8847	9.41485	13.0705	11.4567	11.0251	8.49717	10.0728	9.86502	11.5106	11.2494	8.79673	10.5189	14.2551	9.35843	11.4526	11.6887	0.0281202	0.779118
FBgn0000044	Act57B	2R	16831533	500.492	453.414	456.032	469.979	480.906	451.817	440.811	457.845	262.848	307.623	316.9	295.79	483.579	359.345	474.514	439.146	328.652	318.052	331.051	325.918	531.084	472.754	528.117	510.652	456.032	533.827	533.093	507.651	290.033	337.411	409.739	345.728	177.557	198.286	171.695	182.513	342.194	364.759	403.789	370.247	267.625	235.015	345.746	282.795	2.83647e-09	1.2709e-06
FBgn0000045	Act79B	3L	21978331	12.6791	14.0484	13.4506	13.3927	10.5981	10.4854	11.3941	10.8259	5.09675	11.1041	7.96965	8.05683	9.98588	7.70034	9.78869	9.1583	6.65772	8.58266	9.25257	8.16432	13.3706	16.6824	19.532	16.5283	13.4506	12.2073	14.1019	13.2533	10.8177	10.4206	10.2555	10.4979	10.2849	7.26131	7.12815	8.22479	12.8992	14.195	11.3141	12.8028	10.1379	11.5491	14.2917	11.9929	0.0884771	1
FBgn0000046	Act87E	3R	9251707	38.796	36.6402	42.214	39.2167	36.0221	42.4047	34.7636	37.7301	24.5619	25.4889	25.6655	25.2388	36.7796	25.7205	36.9604	33.1535	20.9716	21.2078	22.5224	21.5673	45.9395	48.9999	48.9542	47.9645	42.214	52.5866	51.4584	48.753	25.6847	27.4625	28.1824	27.1099	13.2584	12.3199	13.6605	13.0796	24.8451	27.5626	29.1748	27.1942	22.7086	21.6189	29.4045	24.5773	2.89491e-05	0.00463244
FBgn0000047	Act88F	3R	11265710	3.00403	0.669304	1.18662	1.61998	0.912512	1.73194	1.6934	1.44595	0.774905	2.96728	0.9859	1.57603	1.87417	1.01076	1.69104	1.52532	0.636734	0.692243	0.444736	0.591238	8.35161	3.25987	3.95827	5.18992	1.18662	3.40504	2.765	2.45222	0.368803	0.901327	2.16911	1.14641	0.434189	0.373082	0.110566	0.305946	1.96224	1.62908	0.854261	1.48186	0.980565	0.988876	1.61139	1.19361	0.784164	1
FBgn0000052	ade2	2L	6041178	26.4202	28.7481	22.6295	25.9326	23.3261	24.0059	23.8617	23.7312	17.2841	14.0652	20.8166	17.3886	40.2214	42.2161	33.6136	38.6837	26.4877	27.4563	25.2128	26.3856	60.7406	59.9089	53.5769	58.0755	22.6295	42.3759	43.7134	36.2396	42.3446	33.4617	25.6673	33.8245	42.5748	43.823	46.1099	44.1692	45.1215	48.3753	36.2205	43.2391	52.4305	37.8022	33.3203	41.1843	0.00222449	0.148444
FBgn0000053	ade3	2L	7014861	37.6253	41.405	33.7714	37.6006	34.1051	38.7591	33.5038	35.456	26.3818	23.0039	28.0984	25.828	49.1194	53.2334	46.428	49.5936	32.616	36.0631	32.6212	33.7668	53.2138	57.7253	49.9448	53.628	33.7714	53.9064	52.2366	46.6381	62.7531	57.1997	31.7163	50.5564	70.5348	67.2543	64.8512	67.5468	69.6111	80.5728	50.9072	67.0304	89.4574	56.7589	34.3769	60.1977	1.85964e-06	0.000383722
FBgn0000054	Adf1	2R	2549775	16.8418	13.4768	14.7191	15.0126	16.4039	16.7595	15.8499	16.3378	13.4268	14.5856	13.7059	13.9061	14.8839	14.3864	12.6199	13.9634	14.2035	11.7141	13.389	13.1022	20.155	17.5657	12.348	16.6896	14.7191	12.3614	16.1269	14.4025	13.9972	14.8514	15.5306	14.7931	11.8849	11.2059	9.13864	10.7431	11.5977	13.9852	15.9515	13.8448	14.6434	13.8578	14.7715	14.4242	0.281213	1
FBgn0000055	Adh	2L	14615555	2798.07	2849.28	2525.92	2724.42	3030.71	3148.04	2963.54	3047.43	3633.37	2972.47	3223.16	3276.33	2988.59	3258.17	3149.35	3132.04	3900	3818.54	3634.55	3784.36	2792.39	2893.85	2621.94	2769.39	2525.92	2777.03	3008.53	2770.49	4990.4	3677.71	2496.65	3721.59	6949.59	5509.33	5252.97	5903.96	4116.18	3772.19	2530.61	3472.99	4365.21	3582.15	2727.47	3558.28	0.0921169	1
FBgn0000056	Adhr	2L	14615555	7.38923	6.96053	7.6533	7.33435	10.7252	13.0022	10.9035	11.5436	13.0909	8.19075	12.694	11.3252	9.2307	9.3205	9.23524	9.26215	11.5063	9.31811	11.3536	10.726	4.88029	6.59195	5.00935	5.49386	7.6533	6.89263	5.43709	6.66101	15.2298	12.1828	7.43203	11.6149	14.8058	16.4603	16.437	15.901	14.8601	12.6703	6.0915	11.2073	11.9164	13.9408	11.3363	12.3978	0.0938424	1
FBgn0000057	adp	2R	14039209	9.71734	9.52947	8.54923	9.26535	6.76223	8.91293	8.42412	8.03309	8.62554	8.425	8.79435	8.61496	9.76399	7.75746	8.63802	8.71982	8.50812	7.23043	9.76517	8.50124	12.8256	18.214	15.7869	15.6088	8.54923	10.5139	12.4375	10.5002	9.4897	9.13943	8.99489	9.20801	9.0569	9.08783	8.42118	8.8553	10.4879	10.4097	11.1371	10.6782	9.71862	9.97839	8.99283	9.56328	0.404394	1
FBgn0000061	al	2L	378112	0.186772	0	0	0.0622573	0.635424	0	0	0.211808	0	0.178125	0.143026	0.10705	0.06042	0	0.272581	0.111	0	0	0.193556	0.0645187	0	0.202678	0.430676	0.211118	0	0	0.534832	0.178277	0.321018	0.0871715	0.0820896	0.163426	0.0755864	0.0811857	0.0962404	0.0843375	0	0	0.278841	0.092947	0	0.202529	0.093507	0.0986787	1	1
FBgn0000063	ald	3R	13496993	0.31917	0.373377	1.47125	0.721266	0.271466	0.483087	1.10225	0.618934	0.512367	0.761132	0.611154	0.628218	0.361458	0.557016	0.32614	0.414871	0.49864	0.171668	0.386013	0.352107	0.887431	0.173118	0.552038	0.537529	1.47125	0.316588	0.114207	0.634015	0.54871	0.596004	0.35077	0.498495	0.323022	0.346906	0.487091	0.385673	0.537787	0.530196	0.635492	0.567825	0.648399	0.346153	0.479478	0.491343	0.673566	1
FBgn0000064	Ald	3R	22079791	556.444	562.203	527.085	548.577	535.618	566.227	530.087	543.977	500.501	493.435	508.868	500.935	494.397	489.09	499.913	494.467	508.255	513.108	488.129	503.164	598.494	570.228	523.768	564.163	527.085	536.933	578.11	547.376	461.697	433.377	376.924	423.999	586.623	511.755	522.119	540.166	470.539	488.012	434.476	464.342	515.744	502.404	486.853	501.667	0.732326	1
FBgn0000071	Ama	3R	2588315	0	0	0.508827	0.169609	0	0.185666	0	0.0618887	0	0	0.169361	0.0564537	0.0715447	0.231631	0.322972	0.208716	0	0	0.305773	0.101924	0.409904	0	0.254986	0.22163	0.508827	0.146232	0.31678	0.323946	0	0.103222	0.0972042	0.0668087	0	0.0961338	0	0.0320446	0	0.104943	0.220209	0.108384	0	0.11991	0	0.03997	1	1
FBgn0000075	amd	2L	19110159	1.53469	3.41557	1.765	2.23842	4.21586	4.24616	3.9434	4.13514	2.60635	3.85359	3.06523	3.17506	1.78474	2.40361	2.32874	2.17236	2.25372	2.20369	2.1621	2.2065	1.07531	1.03648	0.891972	1.00125	1.765	0.997342	0.830767	1.1977	2.30797	2.15048	3.35085	2.6031	2.60856	2.47308	2.16084	2.41416	1.74293	1.72208	1.89352	1.78618	1.95272	2.2694	2.59995	2.27402	0.136222	1
FBgn0000077	amx	X	9139948	4.31322	3.6435	7.98801	5.31491	6.21069	5.9807	5.40352	5.86497	5.80695	6.5913	3.52025	5.30617	3.94589	5.43179	3.64641	4.34136	4.99491	4.241	5.97056	5.06882	7.71031	5.39484	6.8497	6.65162	7.98801	3.01119	4.86574	5.28831	7.11619	7.51141	8.54136	7.72299	6.24877	5.68456	5.33874	5.75736	5.74864	5.16347	5.5464	5.48617	7.94235	4.97502	7.4613	6.79289	0.748059	1
FBgn0000078	Amy-d	2R	13012267	21.7451	6.57185	6.5209	11.6126	19.9109	17.9505	16.6274	18.1629	12.3577	5.25904	20.8748	12.8305	7.60666	10.2377	20.5598	12.8014	5.23239	7.01154	10.5667	7.60354	8.87051	7.56462	5.99784	7.47766	6.5209	5.77869	10.5767	7.62543	22.5322	18.9384	12.5298	18.0001	13.9372	10.4019	9.811	11.3834	8.26269	11.207	5.4884	8.31936	10.9885	4.56928	9.48026	8.34601	0.120522	1
FBgn0000079	Amy-p	2R	13006211	19.5251	4.5266	6.80931	10.287	14.8115	12.0328	14.9926	13.9456	9.31696	4.52949	16.8109	10.2191	5.66761	8.24914	22.396	12.1043	3.32967	4.84252	7.21875	5.13031	6.65083	4.92478	5.8408	5.80547	6.80931	5.30359	10.2756	7.46283	15.9633	12.1177	8.90636	12.3291	8.49978	6.88148	7.45056	7.61061	7.56885	10.3667	5.35731	7.76429	9.96764	3.60503	7.39747	6.99005	0.16533	1
FBgn0000083	AnxB9	3R	16890951	112.88	109.369	108.151	110.133	101.452	101.453	101.115	101.34	97.7098	101.193	97.7369	98.8799	91.7693	92.1241	100.849	94.9141	81.0871	93.4083	96.4891	90.3282	140.5	135.955	136.828	137.761	108.151	113.706	106.072	109.31	99.4268	85.2371	101.148	95.2706	88.7297	81.2277	76.7946	82.2507	89.7351	86.5577	95.4496	90.5808	105.338	99.8739	118.352	107.855	0.600381	1
FBgn0000084	AnxB10	X	20065478	41.3206	44.1309	50.7008	45.3841	48.7363	54.8175	51.0948	51.5495	48.4839	64.458	44.2394	52.3938	44.302	47.4794	48.839	46.8735	46.2326	42.185	43.3641	43.9272	51.7708	61.165	63.0765	58.6708	50.7008	47.6262	45.8835	48.0702	53.7223	50.1088	55.4534	53.0948	50.7298	42.2307	35.2658	42.7421	47.6651	47.4127	48.45	47.8426	46.6279	46.215	53.4547	48.7659	0.588046	1
FBgn0000092	CG2650	X	2586765	0.332981	0.259661	0.613807	0.40215	1.41606	0	0.656965	0.691008	0.801679	0.317566	1.27495	0.798065	0.754027	0.697123	0.971927	0.807692	0.520053	0.11936	0.230051	0.289821	0	0.72268	2.30346	1.00871	0.613807	1.10084	1.19189	0.968846	0.858476	0.621646	0.585405	0.688509	0.269514	0.14474	0.686319	0.366858	0.320532	0.316007	0.662832	0.433124	0.169074	1.08322	1.00024	0.750845	1	1
FBgn0000094	Anp	3R	26035670	0	0	0	0	0	0	0	0	0	0	0	0	0	0	0	0	0	0	0	0	0	0	0	0	0	0	0	0	0	0	0	0	0	0	0	0	0	0	0	0	0	0	0	0	1	1
FBgn0000097	aop	2L	2156484	10.852	11.2765	10.637	10.9218	11.3126	11.6321	10.5137	11.1528	10.7255	11.0531	10.6673	10.8153	12.3121	12.4312	11.6295	12.1243	12.9883	13.2526	13.5352	13.2587	11.6528	10.5203	8.70209	10.2917	10.637	11.417	9.38913	10.481	11.3146	11.6216	10.7158	11.2173	9.25616	8.99461	11.1618	9.80419	12.7432	10.8552	10.1972	11.2652	10.1955	12.1743	9.4242	10.598	1	1
FBgn0000099	ap	2R	1593707	26.5904	23.8583	22.8204	24.423	28.3082	23.6523	19.5889	23.8498	26.3329	28.8183	30.3321	28.4944	25.5247	27.9752	27.5643	27.0214	25.6651	29.2026	24.4555	26.4411	21.7179	25.0496	24.1529	23.6401	22.8204	24.5763	24.5776	23.9914	26.5606	28.78	24.7248	26.6885	31.6576	34.106	33.0731	32.9456	33.8382	29.6484	29.7354	31.074	31.0863	29.9148	26.6685	29.2232	0.0113117	0.464773
FBgn0000100	RpLP0	3L	22069142	684.996	626.639	614.942	642.192	599.303	601.455	599.834	600.197	636.516	608.058	551.806	598.793	494.773	492.95	549.086	512.27	588.903	564.405	576.303	576.537	565.81	616.611	597.641	593.354	614.942	608.974	610.513	611.476	713.538	596.258	569.738	626.511	800.152	678.935	604.963	694.683	709.398	705.838	566.762	660.666	764.171	736.066	613.663	704.633	0.490697	1
FBgn0000108	Appl	X	424503	102.596	120.054	111.413	111.354	132.993	139.549	111.06	127.867	107.599	134.151	129.15	123.633	125.826	109.078	113.876	116.26	110.947	113.287	114.896	113.043	126.59	113.772	123.918	121.427	111.413	128.689	120.983	120.362	111.561	113.208	94.5563	106.442	72.8266	88.4979	88.185	83.1698	125.136	100.883	134.555	120.191	98.3543	90.659	116.939	101.984	0.81692	1
FBgn0000109	Aprt	3L	1883892	11.1013	6.99211	9.44486	9.17942	11.9842	11.6314	11.7938	11.8031	9.25178	9.36579	9.15514	9.25757	12.9837	13.5576	14.2076	13.583	11.4699	9.33622	12.0946	10.9669	18.2014	10.6568	10.8301	13.2294	9.44486	6.21096	12.2267	9.29417	12.4758	13.1525	8.44484	11.3577	11.2318	12.0638	10.7806	11.3587	10.8918	12.5615	8.71184	10.7217	9.3224	12.2694	8.55056	10.0475	0.417939	1
FBgn0000114	aret	2L	12175004	26.9803	26.8013	22.5543	25.4453	21.4501	22.6095	25.5741	23.2112	20.7905	21.9286	21.1017	21.2736	24.3314	22.7767	23.3948	23.501	21.1435	25.1109	21.3871	22.5472	25.5801	27.0858	25.5138	26.0599	22.5543	27.6484	23.6824	24.6284	19.4428	21.8168	18.7826	20.0141	18.4988	17.9786	21.1256	19.201	24.7516	24.7055	25.8238	25.0936	24.6908	21.9686	23.5793	23.4129	0.456504	1
FBgn0000115	Arl1	3L	15976221	17.5886	17.3732	22.6956	19.2191	13.9624	22.478	20.05	18.8301	22.5845	25.7207	17.0608	21.7887	19.0926	22.6394	22.589	21.4403	18.3133	17.7935	15.9322	17.3463	24.6304	24.1763	25.6863	24.831	22.6956	26.8773	22.105	23.8926	19.482	18.2424	18.0378	18.5874	25.1506	19.5382	17.9248	20.8712	20.3172	16.692	16.5334	17.8475	21.2353	15.6818	18.1984	18.3718	0.14385	1
FBgn0000116	Argk	3L	9041980	585.733	586.675	584.422	585.61	591.137	642.852	637.609	623.866	476.593	555.692	542.481	524.922	499.478	411.212	477.156	462.615	464.279	473.596	430.427	456.101	589.429	538.951	517.908	548.763	584.422	501.047	548.267	544.579	478.112	472.693	559.261	503.355	451.264	399.84	362.676	404.593	453.445	455.19	496.899	468.511	454.586	423.8	515.867	464.751	0.0572784	1
FBgn0000117	arm	X	1785434	52.9925	53.1482	54.3106	53.4838	62.3034	62.158	58.8857	61.1157	53.0609	57.6253	56.6348	55.7737	53.817	47.8312	50.7645	50.8042	50.3924	53.7728	50.3758	51.5137	65.4564	58.8125	59.3582	61.209	54.3106	57.0392	63.1486	58.1661	60.5755	56.6047	60.9533	59.3778	55.7157	50.9863	46.1157	50.9392	58.9489	53.2433	57.0954	56.4292	56.5935	52.6141	57.1887	55.4654	0.598782	1
FBgn0000119	arr	2R	9341159	5.39785	4.12159	3.73134	4.41693	4.73454	5.50284	4.21557	4.81765	5.7759	5.52334	5.38227	5.5605	4.36547	4.08086	4.39844	4.28159	4.81237	5.01867	3.72929	4.52011	3.33484	5.49147	3.88965	4.23865	3.73134	4.79594	4.06553	4.1976	5.29117	6.21959	6.91967	6.14348	5.09718	4.88819	5.6208	5.20206	6.06205	5.92312	5.34451	5.77656	5.62437	5.09112	4.7011	5.13886	0.0437202	0.935073
FBgn0000120	Arr1	2L	18078269	1883.68	2325.54	2399.72	2202.98	2587.61	2132.23	2165.09	2294.98	1649.08	2408.59	2349.13	2135.6	1643.15	1296.83	2075.21	1671.73	2078.77	2056.03	1719.32	1951.37	2077.32	2119.15	2103.8	2100.09	2399.72	2223.61	2090.91	2238.08	2249.32	2065.24	2841.72	2385.43	2163.75	2060.28	1647.49	1957.17	2083.4	1988.79	2151.48	2074.56	1950.94	1664.85	2118.2	1911.33	0.702436	1
FBgn0000121	Arr2	3L	8640367	2622.82	3047.28	3251.82	2973.97	3269.7	2659.47	2800.54	2909.9	2145.3	2912.3	2872.09	2643.23	2119.31	1705.13	2576.66	2133.7	2484.16	2497.64	2111.99	2364.6	2929.89	2860.15	2958.36	2916.13	3251.82	2979.98	2753.02	2994.94	3297.63	3152.81	4037.07	3495.84	2703.8	2493.23	2119.54	2438.86	3111.19	3112.79	3164.86	3129.61	2884.94	2529.4	2977.17	2797.17	0.483416	1
FBgn0000137	ase	X	354533	0	0	0	0	0	0	0	0	0.101121	0	0	0.033707	0.0407615	0	0	0.0135872	0	0	0	0	0	0	0	0	0	0	0	0	0	0	0	0	0	0	0	0	0	0	0	0	0	0	0	0	1	1
FBgn0000139	ash2	3R	20475810	13.4631	10.6855	10.3427	11.4971	11.5735	13.6315	13.0103	12.7384	14.7797	13.5987	11.6834	13.3539	9.77298	7.88428	9.04055	8.89927	9.53629	10.2052	10.0318	9.92443	7.01038	9.40324	14.7695	10.3944	10.3427	13.9782	12.7282	12.3497	15.0829	13.4823	14.6857	14.417	14.6302	11.9144	13.828	13.4575	14.9883	15.1502	15.7825	15.307	14.9609	15.0903	16.3852	15.4788	0.352252	1
FBgn0000140	asp	3R	20579625	0.0536775	0.0418581	0.0494738	0.0483365	0.0456547	0.0541575	0.0529524	0.0509215	0	0	0	0	0.0173645	0.0187297	0.0313355	0.0224766	0	0	0	0	0	0	0.0618873	0.0206291	0.0494738	0	0.0384272	0.0293003	0.0230648	0.0501056	0.0707768	0.0479824	0	0	0	0	0.0516707	0	0.0267126	0.0261278	0	0.0582062	0.107494	0.0552334	0.129759	1
FBgn0000146	aub	2L	10997819	0.831988	0.194537	0.459882	0.495469	0.636581	0.629279	0.492217	0.586026	0.300316	0.11895	0.286566	0.235277	0.153796	0.130574	0.457131	0.247167	0.11689	0.223572	0.0861766	0.142213	0.231166	0.270714	0.1438	0.215227	0.459882	0.329912	0.267895	0.352563	0.536009	0.221891	0.47015	0.40935	0.403864	0.154991	0.192826	0.25056	0.400439	0.355147	0.591481	0.449022	0.120699	0.322206	0.437162	0.293356	0.075754	1
FBgn0000147	aur	3R	7788852	0.214437	0.334439	0.988218	0.512365	0.911932	0.216354	0.63462	0.587635	0.344183	0.818041	0.656849	0.606358	0.763066	0.448942	0.688505	0.633504	0.468874	0.461202	0.444453	0.458176	0.794886	1.1635	0.494469	0.817618	0.988218	0.283573	0.307027	0.526273	1.01356	0.700587	1.22524	0.979796	0.607478	0	0.883968	0.497149	0.82568	0.712271	0.747003	0.761651	1.41547	0.232529	0.751503	0.799834	1	1
FBgn0000150	awd	3R	27570894	288.362	284.61	237.829	270.267	223.994	249.608	238.28	237.294	242.093	244.062	228.157	238.104	235.104	240.222	267.571	247.632	240.473	246.782	222.014	236.423	330.338	348.717	299.343	326.133	237.829	300.422	293.276	277.176	263.589	215.538	220.978	233.368	340.842	257.397	224.254	274.164	246.597	286.033	238.82	257.15	282.842	297.691	274.087	284.873	0.695443	1
FBgn0000152	Axs	X	16574122	1.83391	3.27495	4.26892	3.12593	4.79084	3.21354	3.35983	3.78807	3.8959	3.75861	2.21274	3.28908	2.93054	3.33667	3.17354	3.14692	3.52715	2.82889	2.57929	2.97844	2.67065	2.41655	2.86954	2.65225	4.26892	2.77163	2.71954	3.25336	3.22705	3.93789	3.93215	3.69903	2.13224	3.01784	2.149	2.43303	3.89518	3.17007	3.49351	3.51959	3.2632	2.27273	3.88615	3.14069	0.896869	1
FBgn0000153	b	2L	13821248	8.49099	8.04944	7.68439	8.07494	7.41428	8.60205	8.41091	8.14241	6.47128	4.78072	6.50877	5.92026	6.61942	4.68593	5.48847	5.59794	6.42378	6.63406	5.23365	6.09716	8.19959	9.21414	6.33447	7.91607	7.68439	7.31256	6.0879	7.02828	9.30061	7.6689	9.72734	8.89895	4.98059	6.79893	3.86719	5.21557	6.1702	6.8595	6.80038	6.61003	7.00562	5.68689	6.82433	6.50561	0.0493856	0.970925
FBgn0000157	Dll	2R	20702353	4.44173	5.60302	4.09387	4.71287	3.33921	5.52744	5.53214	4.7996	5.87112	4.05722	3.70152	4.54329	4.691	3.93713	4.9491	4.52574	5.08652	5.03356	5.01893	5.04634	4.35846	5.67061	5.12107	5.05005	4.09387	3.80067	4.30206	4.06553	4.72678	4.55817	4.24895	4.5113	2.81173	3.99126	3.23043	3.34447	4.33855	3.62425	4.03078	3.99786	2.12266	3.47069	3.79345	3.12893	1	1
FBgn0000158	bam	3R	21068761	0	0	0	0	0	0	0	0	0	0	0	0	0.109173	0	0	0.036391	0	0	0	0	0	0	0	0	0	0	0	0	0	0	0.222492	0.074164	0	0.0733473	0	0.0244491	0	0	0	0	0	0.0914877	0.084479	0.0586556	1	1
FBgn0000163	baz	X	17054062	11.507	9.92434	9.17459	10.202	12.2978	10.9827	11.7245	11.6683	10.2628	11.0346	11.0135	10.7703	10.5167	10.7746	11.7742	11.0218	11.4357	10.537	11.577	11.1832	13.2669	11.9692	11.3459	12.194	9.17459	10.5008	8.73127	9.46889	10.2573	9.77607	10.7773	10.2702	8.14428	7.76994	9.56878	8.49433	10.2985	10.1006	11.7574	10.7188	8.38348	9.53367	10.6459	9.52102	0.57809	1
FBgn0000166	bcd	3R	2581564	0.199589	0.104657	0.0617529	0.122	0.0569858	0.268595	0	0.108527	0.213645	0.320246	0.260038	0.264643	0.172317	0.0544938	0.253413	0.160075	0.146866	0.119307	0.0695734	0.111915	0	0	0.0772473	0.0257491	0.0617529	0.176022	0.142883	0.126886	0.200262	0.0626389	0.234208	0.165703	0.0537805	0.173631	0.205828	0.144413	0.320499	0	0.165634	0.162044	0.204619	0.144337	0.166632	0.171863	0.242803	1
FBgn0000173	ben	X	13890387	80.1599	73.6668	68.317	74.0479	79.5559	78.0407	69.9181	75.8382	78.4115	71.9382	72.3126	74.2208	60.7226	59.0362	71.3055	63.6881	63.7963	67.2033	70.1375	67.0457	62.8262	61.9313	63.7543	62.8373	68.317	67.8648	61.5301	65.904	80.0613	75.1105	82.9574	79.3764	78.513	68.0048	70.8138	72.4439	82.5646	78.2867	86.749	82.5334	75.8587	71.6866	80.6893	76.0782	0.719954	1
FBgn0000179	bi	X	4306889	6.10355	7.66096	7.54844	7.10432	8.13581	8.80098	8.11268	8.34982	7.34898	9.27211	9.41605	8.67905	9.2342	8.24854	9.26031	8.91435	7.82879	7.21864	7.93881	7.66208	8.88026	7.02035	9.20967	8.37009	7.54844	8.71813	8.29847	8.18835	6.2761	5.90301	6.43739	6.2055	3.26744	4.9096	3.90462	4.02722	6.66824	5.9094	6.39174	6.32313	5.35498	4.48344	7.03147	5.6233	0.457685	1
FBgn0000180	bib	2L	9984634	1.84715	1.28037	1.32416	1.48389	1.30922	1.34598	0.708631	1.12128	0.741193	1.46803	1.25735	1.15552	1.39427	1.11002	1.19813	1.23414	0.993686	1.43461	1.63065	1.35298	2.66276	1.44767	1.77472	1.96172	1.32416	1.5606	2.35085	1.7452	1.54332	1.24528	1.71392	1.50084	1.78579	1.33819	1.48059	1.53486	1.43235	1.07127	1.22564	1.24309	1.04212	1.11277	1.13028	1.09506	0.914457	1
FBgn0000181	bic	2R	8757742	217.43	203.65	212.563	211.214	189.422	192.957	198.549	193.643	222.809	202.059	179.54	201.469	185.844	183.017	207.441	192.101	201.531	201.079	198.964	200.525	233.292	223.843	213.617	223.584	212.563	216.65	222.37	217.194	250.295	223.674	222.309	232.093	246.33	207.222	195.067	216.206	245.333	245.982	212.693	234.669	246.58	214.241	186.884	215.902	0.244922	1
FBgn0000182	BicC	2L	16042032	0.111762	0	0	0.037254	0	0	0	0	0	0	0	0	0	0	0.0326219	0.010874	0	0	0	0	0	0	0	0	0	0.147797	0	0.0492657	0	0	0	0	0	0	0	0	0.107585	0.267717	0	0.125101	0.424479	0	0	0.141493	1	1
FBgn0000183	BicD	2L	17459605	12.6143	15.6377	17.3159	15.1893	19.1909	19.6072	17.5662	18.7881	16.5405	20.8059	17.4646	18.2703	17.8094	18.2768	18.4218	18.1693	16.1419	16.633	18.5807	17.1185	16.667	16.2536	15.6063	16.1756	17.3159	14.676	14.8964	15.6294	17.3853	18.7347	20.7402	18.9534	11.6311	14.7158	16.5159	14.2876	18.6575	16.1921	19.6257	18.1584	16.1765	14.6866	17.3727	16.0786	0.859253	1
FBgn0000206	boss	3R	21787716	21.2708	23.7457	26.5183	23.8449	31.9935	29.4806	28.935	30.1364	21.1134	27.8667	28.4625	25.8142	22.5625	15.6253	25.3575	21.1818	25.5277	27.1279	20.7672	24.4743	31.539	27.5773	25.4276	28.1813	26.5183	29.387	26.6081	27.5045	25.1587	23.6174	33.6068	27.461	21.9737	19.5138	18.4598	19.9824	25.8638	24.755	28.3577	26.3255	21.3735	21.7907	25.1096	22.7579	0.160121	1
FBgn0000210	br	X	1469165	6.00419	5.78672	6.03484	5.94192	6.96428	7.2735	6.9668	7.06819	5.54752	7.70261	6.50697	6.5857	6.97934	6.01745	6.06594	6.35424	6.46338	6.4075	5.99684	6.28924	8.24504	8.09204	8.98759	8.44156	6.03484	7.10265	8.00238	7.04662	4.51277	5.02343	5.45593	4.99738	3.01203	4.44008	4.54852	4.00021	6.61823	5.95776	6.18653	6.25417	4.85776	3.57847	6.28606	4.90743	0.301019	1
FBgn0000212	brm	3L	15963182	12.7079	12.9478	12.2597	12.6385	14.2899	14.2327	14.117	14.2132	13.945	13.6255	12.0469	13.2058	12.0554	11.8489	11.4992	11.8012	10.9741	12.0392	11.785	11.5994	14.6371	15.3917	15.4426	15.1571	12.2597	13.539	15.3687	13.7225	12.9914	12.9501	11.9108	12.6174	8.54403	10.1659	11.3186	10.0095	13.1725	12.4498	13.4391	13.0205	11.05	11.5854	12.3952	11.6769	0.509364	1
FBgn0000216	Brd	3L	14965769	0	0	0	0	0	0	0	0	0	0	0	0	0	0	0	0	0	0	0	0	0	0	0	0	0	0	0	0	0	0	0	0	0	0	0	0	0	0	0	0	0	0	0	0	1	1
FBgn0000221	brn	X	3998377	0.931794	1.45324	1.93235	1.43913	1.78318	1.17516	1.14901	1.36912	3.73895	0.888659	2.31904	2.31555	1.20573	1.21924	1.42789	1.28429	1.74634	1.58655	1.36799	1.56696	2.59052	1.76952	0.268577	1.54287	1.93235	1.38624	1.33412	1.5509	1.70164	1.41341	1.33101	1.48202	2.07403	1.51887	2.16062	1.91784	1.1212	2.32128	1.85483	1.76577	1.41938	1.76821	1.51613	1.56791	0.116561	1
FBgn0000227	Bsg25A	2L	4683050	0	0	0	0	0	0	0	0	0	0	0	0	0	0	0	0	0	0	0	0	0	0	0	0	0	0	0	0	0	0	0	0	0	0	0	0	0	0	0	0	0	0	0	0	1	1
FBgn0000228	Bsg25D	2L	5271728	11.2731	11.8184	10.5367	11.2094	13.881	15.4026	12.8774	14.0537	13.4711	15.039	11.5274	13.3458	12.2019	12.0209	11.8436	12.0221	11.0436	12.226	10.713	11.3275	15.3308	10.4512	11.3176	12.3665	10.5367	11.5993	13.1545	11.7635	11.5494	13.6896	14.125	13.1213	8.84612	9.7266	11.0766	9.88311	12.5334	11.4898	13.6	12.5411	11.933	9.95709	12.1372	11.3424	0.984143	1
FBgn0000229	bsk	2L	10247502	36.2841	38.2468	40.2283	38.2531	42.9363	46.3513	40.524	43.2705	40.7722	40.6131	43.9912	41.7922	39.4133	38.6747	38.35	38.8127	34.6947	33.296	36.2122	34.7343	33.8044	32.0307	34.7605	33.5319	40.2283	34.9505	36.0011	37.06	40.9468	43.7061	48.4624	44.3718	32.094	35.1441	30.7978	32.6786	43.8546	36.5809	48.1235	42.853	41.0213	40.4386	46.0656	42.5085	0.95065	1
FBgn0000233	btd	X	9588221	0.343376	0.178511	0.316485	0.279457	0.194702	0	0.564562	0.253088	0.183712	0	0.0876504	0.0904541	0.222162	0.0399381	0.200454	0.154185	0.14301	0.123086	0.118616	0.128237	0.21214	0.124207	0.131965	0.156104	0.316485	0.302721	0.573578	0.397595	0.049182	0.320526	0.15092	0.173543	0.185285	0.348269	0.235915	0.25649	0.220359	0.108624	0.113921	0.147635	0.116235	0.186173	0.343821	0.21541	0.371846	1
FBgn0000239	bur	2L	21174383	35.4699	30.4436	30.1447	32.0194	30.3643	29.9775	29.5376	29.9598	26.1551	25.7004	25.8394	25.8983	31.4056	32.5487	30.4882	31.4808	29.785	30.8781	26.6936	29.1189	36.7124	31.2425	39.3016	35.7522	30.1447	37.0828	33.3895	33.539	42.309	36.9795	26.877	35.3885	31.9251	34.24	35.308	33.8244	47.1694	34.2629	33.0108	38.1477	38.3593	38.8995	33.9592	37.0727	0.179083	1
FBgn0000241	bw	2R	19415328	9.87729	9.82054	10.9245	10.2074	11.7614	7.4742	8.64767	9.29442	7.43137	9.18454	8.0366	8.2175	7.58877	6.41909	7.24367	7.08384	6.82621	7.21399	6.99466	7.01162	10.2976	11.5224	10.1068	10.6423	10.9245	12.3271	10.695	11.3155	7.26819	7.26076	8.57398	7.70098	6.2958	5.90349	5.98029	6.05986	8.67606	9.95966	10.1381	9.59127	7.96176	8.50156	8.65384	8.37239	0.603345	1
FBgn0000242		X	18428698	20.2137	16.9348	20.0706	19.073	19.8499	20.6573	21.2209	20.576	20.2875	21.0834	18.9391	20.1033	17.4247	19.1862	18.7118	18.4409	16.0322	18.5315	18.8654	17.8097	18.9282	20.255	19.0769	19.42	20.0706	18.5763	18.2168	18.9546	17.7442	18.3069	18.7915	18.2809	12.7608	15.2285	16.6576	14.8823	21.4661	17.4224	19.5271	19.4719	18.1169	16.1429	17.7217	17.3272	1	1
FBgn0000244	by	3R	5353960	20.3046	19.9149	20.4086	20.2094	21.6128	18.7964	18.9993	19.8028	17.4566	18.9835	19.1114	18.5172	17.1791	17.5516	16.5325	17.0877	16.1679	14.9791	16.9829	16.0433	20.4915	16.2853	20.5784	19.1184	20.4086	21.6051	19.0342	20.3493	19.7633	18.7802	19.4364	19.3266	16.4431	15.1617	17.314	16.3063	17.1824	18.3332	19.9219	18.4792	15.5655	17.9306	17.0122	16.8361	0.745669	1
FBgn0000246	c(3)G	3R	11615195	2.33626	1.82236	1.31626	1.82496	1.65636	2.48885	1.28073	1.80865	1.25028	1.98111	1.58979	1.60706	1.80602	1.22316	1.78113	1.60344	1.48591	1.39618	2.01822	1.63344	0.721771	0.845267	1.19745	0.921496	1.31626	2.14612	1.67299	1.71179	3.52419	1.99967	1.42658	2.31681	0.788126	1.24145	1.53867	1.18942	2.18712	1.72499	2.58444	2.16552	1.62622	2.25257	2.79499	2.22459	0.828426	1
FBgn0000247	ca	3R	25632970	5.56903	5.33882	5.88635	5.59807	6.86599	7.42303	6.30022	6.86308	5.86339	7.01666	7.82508	6.90171	6.44596	5.97223	5.72663	6.04827	6.51136	7.43565	6.42435	6.79045	6.53397	5.76611	5.89064	6.06357	5.88635	7.29695	7.35183	6.84504	6.16904	6.93921	7.97184	7.0267	6.01698	5.99633	6.58172	6.19834	7.30351	6.10944	7.55151	6.98815	6.01865	5.56796	6.67616	6.08759	0.875783	1
FBgn0000250	cact	2L	16313029	50.6714	42.0865	47.2365	46.6648	51.8291	47.1912	47.8984	48.9729	46.5169	48.3539	47.7182	47.5297	43.2796	39.5551	52.954	45.2629	40.8501	39.9193	46.7321	42.5005	43.6598	46.841	45.6499	45.3836	47.2365	47.4516	44.1594	46.2825	40.0132	43.6394	38.1103	40.5876	35.057	35.8149	32.5607	34.4775	44.3532	46.1535	44.4143	44.9737	41.0427	38.3385	43.2953	40.8922	0.988406	1
FBgn0000251	cad	2L	20770736	0	0	0	0	0	0	0	0	0	0	0	0	0.0927427	0	0.0418377	0.0448601	0	0	0	0	0	0	0	0	0	0.189559	0.102612	0.0973903	0	0	0.0629985	0.0209995	0	0.0623048	0	0.0207683	0	0	0	0	0.0727798	0	0	0.0242599	1	1
FBgn0000253	Cam	2R	8146913	1248.93	1311.28	1242.53	1267.58	1538.36	1465.88	1318.09	1440.78	1260.23	1425.58	1430.41	1372.07	1388.48	1282.12	1390.23	1353.61	1326.62	1374.21	1336.9	1345.91	1187.69	1132.66	1216.97	1179.11	1242.53	1229.8	1211.29	1227.87	1070.28	1097.37	889.735	1019.13	665.894	847.867	925.431	813.064	1055.66	925.497	1100.73	1027.3	972.007	919.104	1051.25	980.787	0.925956	1
FBgn0000256	capu	2L	3872658	10.6785	13.5137	12.7777	12.3233	15.9595	15.0219	14.6395	15.207	16.2432	16.6771	15.4852	16.1352	11.9153	11.468	11.5786	11.654	13.7055	13.5787	13.7618	13.682	11.8852	11.1846	13.9394	12.3364	12.7777	12.7355	11.8816	12.4649	11.0086	9.88461	11.832	10.9084	10.2169	13.0926	12.5697	11.9597	13.8485	12.0946	11.4038	12.449	10.9615	9.81967	11.4729	10.7514	0.280441	1
FBgn0000257	car	X	19460052	3.81444	3.99438	4.82155	4.21012	5.28367	4.39835	4.19297	4.625	4.02332	4.98902	4.33986	4.45073	5.07691	5.32394	4.77169	5.05751	4.39153	4.72705	4.02832	4.3823	3.98961	5.79506	4.02093	4.60187	4.82155	5.98107	3.97907	4.92723	5.52595	4.98487	5.22121	5.24401	4.45468	4.16885	3.76259	4.12871	5.71762	5.32661	5.53211	5.52545	4.75907	4.60901	5.1481	4.83873	0.916312	1
FBgn0000259	CkIIbeta	X	11686569	61.3524	61.8226	56.1418	59.7723	64.4765	63.1011	59.0923	62.2233	54.8617	62.4014	65.6361	60.9664	59.7297	60.8213	63.4134	61.3215	54.5761	57.2836	57.0235	56.2944	63.3594	57.9903	57.1174	59.489	56.1418	55.2196	58.3192	56.5602	52.1332	55.3944	47.6888	51.7388	35.6731	43.5685	43.302	40.8479	52.8456	47.4682	52.0444	50.7861	51.7862	45.8277	50.0047	49.2062	0.721382	1
FBgn0000261	Cat	3L	18815704	119.996	117.594	109.507	115.699	145.534	149.415	140.414	145.121	157.422	140.429	133.884	143.912	98.2231	102.343	106.212	102.259	117.152	126.493	116.813	120.153	91.9102	97.5242	95.8103	95.0816	109.507	89.861	91.3564	96.9081	125.158	108.536	113.813	115.836	145.961	117.488	128.112	130.52	81.9485	97.978	96.8598	92.2621	98.2257	102.866	96.3418	99.1445	0.637237	1
FBgn0000273	Pka-C1	2L	9682315	97.0342	96.9916	88.3147	94.1135	102.924	100.366	89.6674	97.6525	88.8914	95.5292	92.1839	92.2015	99.8411	89.102	95.9053	94.9495	82.9905	81.7973	90.4173	85.0684	81.3587	81.4131	96.1676	86.3131	88.3147	91.3833	93.2353	90.9778	65.9169	73.907	67.5689	69.1309	39.1452	56.8696	53.4258	49.8135	80.7703	68.2829	84.9902	78.0145	65.2121	64.8954	76.0087	68.7054	0.783934	1
FBgn0000274	Pka-C2	3R	26521258	0	0	0	0	0	0	0	0	0	0	0	0	0	0	0	0	0	0	0.0863117	0.0287706	0	0	0	0	0	0	0	0	0	0	0	0	0	0	0	0	0	0	0	0	0	0	0	0	1	1
FBgn0000276	CecA1	3R	26036596	38.222	32.4138	28.183	32.9396	24.7883	12.5332	2.82793	13.3831	43.7108	2.73395	14.269	20.2379	12.0556	6.00158	89.531	35.8627	3.73098	12.5022	19.3101	11.8478	55.7878	62.7344	35.2544	51.2589	28.183	42.9633	107.399	59.5151	0.410593	0.445982	0.629974	0.495516	4.83389	2.49215	2.21571	3.18058	7.12865	9.97526	30.6717	15.9252	43.1819	17.8739	38.2716	33.1091	0.123306	1
FBgn0000277	CecA2	3R	26037878	34.11	35.0961	22.7057	30.6373	14.9088	16.2515	1.8694	11.0099	24.3326	4.51818	11.972	13.6076	7.66282	3.96733	62.7797	24.8033	3.69954	10.6987	16.2016	10.1999	53.5616	37.5291	28.4028	39.8312	22.7057	38.2158	94.9626	51.9614	1.62853	0.442224	1.04111	1.03729	4.02625	1.64743	2.68527	2.78632	15.2773	8.0928	30.8848	18.085	41.3747	19.7782	46.4877	35.8802	0.573828	1
FBgn0000278	CecB	3R	26039056	6.64649	3.23936	3.06299	4.31628	0.706635	0	0	0.235545	0	1.5847	0.636221	0.740307	1.34382	0.289896	4.12255	1.91876	0.259514	0.595624	0.573994	0.476377	1.53985	7.21256	3.83153	4.19465	3.06299	5.49335	13.0849	7.21375	0.356994	0.387763	0	0.248252	0	0	0	0	0.79975	1.97115	6.20181	2.9909	4.64037	1.80181	5.40728	3.94982	0.631735	1
FBgn0000279	CecC	3R	26042206	18.3987	16.3971	16.9578	17.2512	6.70661	7.0717	0.864293	4.88087	3.51559	5.01342	1.34185	3.29029	7.93589	2.13996	29.409	13.1616	1.64202	3.76868	5.75038	3.72036	42.2198	44.6851	36.3647	41.0899	16.9578	30.1235	68.3661	38.4825	3.76466	1.22674	3.0806	2.69067	1.06371	1.90417	1.35437	1.44075	11.3855	4.57307	15.2602	10.4063	17.7945	15.2007	21.0544	18.0165	0.687787	1
FBgn0000283	Cp190	3R	11096146	20.1994	20.6644	20.1016	20.3218	21.1121	21.1558	20.3093	20.8591	18.5502	23.0363	19.7238	20.4368	19.824	17.6452	19.338	18.9357	17.0665	18.01	19.4707	18.1824	24.0217	19.2604	23.7406	22.3409	20.1016	18.8273	19.5616	19.4968	16.3543	17.8852	15.8394	16.693	13.7509	13.7846	15.1797	14.2384	17.4871	16.0606	19.9763	17.8413	16.7476	14.6601	18.7054	16.7044	0.937767	1
FBgn0000286	Cf2	2L	4876890	19.8166	21.6385	16.4031	19.2861	22.4588	19.0671	20.1764	20.5674	19.2062	24.6301	21.7345	21.8569	19.4361	17.7867	20.3903	19.2044	19.2802	18.2025	17.4179	18.3002	20.8284	16.8384	19.619	19.0953	16.4031	20.0431	18.3534	18.2665	14.9025	16.0146	15.562	15.493	12.4	14.7167	15.9187	14.3451	19.6915	17.4816	18.7984	18.6572	16.8772	15.0473	17.0387	16.3211	0.302445	1
FBgn0000287	salr	2L	11358873	2.60321	3.14332	2.27938	2.6753	2.82304	1.96989	2.8087	2.53388	2.53543	2.91718	2.89064	2.78108	2.88429	2.05737	3.10818	2.68328	2.39877	2.40285	2.6458	2.48247	2.6537	2.40118	2.40109	2.48532	2.27938	1.97956	2.00352	2.08749	2.72248	2.91599	3.06644	2.90164	2.37762	2.28557	2.1127	2.25863	2.81912	2.77935	2.76892	2.78913	2.59748	2.1462	2.34605	2.36324	0.38564	1
FBgn0000289	cg	2R	10061175	23.9049	29.649	27.6224	27.0588	29.8041	31.5151	27.8234	29.7142	25.7796	31.6337	27.6122	28.3418	26.6941	24.4229	26.3938	25.8369	24.4276	27.4387	27.9353	26.6005	31.473	31.1572	31.4285	31.3529	27.6224	27.2175	26.6998	27.1799	24.3679	27.2276	26.5408	26.0454	17.8429	19.8337	19.3644	19.0137	28.9564	22.1021	29.27	26.7762	23.2903	22.0327	25.9497	23.7576	0.962484	1
FBgn0000299	Cg25C	2L	5029615	37.3396	36.3804	33.3917	35.7039	40.6889	38.9731	37.0542	38.9054	32.2454	36.8039	28.0599	32.3697	40.2378	44.2763	42.0341	42.1827	32.1563	37.7317	33.9732	34.6204	52.8739	50.6705	42.3863	48.6436	33.3917	41.4027	33.4604	36.0849	39.8482	32.3536	27.1907	33.1308	29.7388	30.9385	29.8824	30.1866	35.4959	39.9072	32.1333	35.8455	26.2354	28.4822	18.9053	24.541	0.070533	1
FBgn0000303	Cha	3R	14531245	13.909	17.7703	13.5081	15.0625	19.5984	20.9113	17.6777	19.3958	14.422	17.9704	16.5508	16.3144	17.7759	16.8646	17.434	17.3582	16.7527	15.6766	15.9749	16.1347	20.0599	20.2095	19.4604	19.9099	13.5081	18.1121	18.4607	16.6936	14.9118	15.6132	17.4494	15.9915	12.1117	12.4642	10.5112	11.6957	18.9301	13.7828	19.8418	17.5182	15.3226	15.0775	17.3662	15.9221	0.0820862	1
FBgn0000307	chif	2L	16342430	10.7618	11.1422	10.1052	10.6697	11.3131	13.0811	10.6842	11.6928	10.0453	13.1823	11.7398	11.6558	11.3777	10.9734	12.1229	11.4913	11.7345	11.9467	11.2911	11.6574	12.1999	10.5703	9.53951	10.7699	10.1052	12.3779	10.4641	10.9824	9.94718	10.8947	10.4096	10.4172	7.33612	8.73922	10.101	8.72545	11.6172	10.0007	11.3587	10.9922	10.2975	8.09621	9.64685	9.34685	0.868796	1
FBgn0000308	chic	2L	5972115	268.049	236.659	250.348	251.685	265.728	257.641	247.515	256.961	241.216	254.276	234.818	243.437	239.393	228.165	252.439	239.999	192.685	197.174	207.912	199.257	238.841	240.248	256.165	245.085	250.348	221.482	250.232	240.687	179.83	181.761	184.997	182.196	135.7	155.061	149.192	146.651	179.184	176.325	186.336	180.615	180.108	182.179	198.36	186.882	0.495154	1
FBgn0000313	chp	3R	27029902	138.094	156.859	174.016	156.323	183.625	159.296	145.34	162.754	123.626	170.356	161.229	151.737	145.497	112.637	160.239	139.458	160.607	154.609	137.059	150.758	161.299	155.396	154.219	156.971	174.016	177.852	171.277	174.382	171.361	182.013	235.779	196.384	139.524	133.908	126.982	133.471	168.176	170.012	183.201	173.796	130.778	141.63	164.397	145.602	0.663596	1
FBgn0000316	cin	X	148943	11.9832	12.8335	8.83638	11.2177	9.37739	6.43935	13.3984	9.73838	7.80621	12.473	12.4809	10.92	11.9922	11.2624	10.3434	11.1993	10.681	9.04977	8.83129	9.52069	9.77119	10.0475	12.1589	10.6592	8.83638	9.56295	10.6382	9.67918	13.5258	14.095	12.8519	13.4909	10.4756	12.3631	10.7034	11.1807	14.0736	10.539	11.4504	12.021	11.908	12.6485	12.7195	12.4253	0.457641	1
FBgn0000317	ck	2L	15044963	7.33207	7.20649	5.89688	6.81181	6.63345	5.93345	5.98559	6.18416	6.63385	6.14629	5.68631	6.15548	5.30098	5.50461	5.12368	5.30976	5.68583	5.50632	5.534	5.57538	7.09641	6.78929	5.70409	6.52993	5.89688	6.5774	7.08847	6.52092	6.05671	5.8639	6.52342	6.14801	5.72331	5.66397	6.27823	5.8885	6.36146	7.61866	7.47913	7.15308	7.01737	7.72014	7.01013	7.24921	0.492777	1
FBgn0000318	cl	2L	5520135	64.506	64.9371	55.8636	61.7689	50.8988	52.1123	60.8313	54.6141	63.0224	44.443	52.9212	53.4622	54.0618	45.0561	53.5356	50.8845	42.3097	47.7979	46.4263	45.5113	67.4019	60.6249	43.7512	57.2593	55.8636	58.8938	58.8599	57.8724	68.4022	60.5128	63.1454	64.0201	54.3088	57.274	45.3536	52.3121	55.0466	58.1843	52.7192	55.3167	59.1423	50.5595	58.578	56.0933	0.840972	1
FBgn0000319	Chc	X	15722019	47.3358	51.6584	48.8587	49.2843	52.0716	53.4476	56.6246	54.0479	48.5333	52.1042	54.1189	51.5855	46.6975	44.3735	45.5195	45.5302	45.1641	48.4466	46.5193	46.71	56.3972	50.0457	52.4163	52.9531	48.8587	51.0499	51.3891	50.4326	54.5484	54.907	60.2295	56.5616	52.836	55.1737	55.4692	54.493	54.1684	54.2037	56.825	55.0657	52.2154	50.1175	54.2778	52.2036	0.971287	1
FBgn0000320	eya	2L	6527447	7.46201	5.78905	7.51271	6.92126	9.63893	7.42532	6.42921	7.83115	6.84183	8.1901	7.00007	7.344	7.22969	6.12981	6.79721	6.7189	6.68805	6.92046	5.54067	6.38306	7.76232	6.57469	6.62401	6.98701	7.51271	6.51458	6.50687	6.84472	5.82387	6.02635	7.86728	6.5725	5.48429	5.49162	4.71006	5.22866	7.03443	6.51083	8.9297	7.49165	7.49768	5.7345	7.03247	6.75488	0.552811	1
FBgn0000326	clt	2R	17504566	8.50671	7.49884	8.18141	8.06232	8.0217	5.59746	9.85123	7.82346	7.12369	7.76018	6.51429	7.13272	8.0762	8.13043	6.47738	7.56134	6.874	6.8278	7.92137	7.20772	11.6535	11.6393	8.10208	10.465	8.18141	8.92609	6.35464	7.82071	7.70785	8.97637	7.55899	8.08107	7.48404	5.94845	7.81383	7.08211	6.85356	8.42408	7.27035	7.516	7.32413	10.5279	9.07325	8.97509	0.875077	1
FBgn0000330	cm	X	6903039	7.80696	10.2165	8.21519	8.74622	8.13952	9.84681	8.60762	8.86465	9.35045	5.6937	8.64569	7.89661	8.27222	8.79566	9.20254	8.75681	8.14676	10.2229	8.68385	9.01784	14.5152	7.18037	5.51112	9.0689	8.21519	8.51055	8.79199	8.50591	10.334	9.42888	12.4241	10.729	11.2383	10.3986	9.67492	10.4373	7.75126	10.4835	8.59975	8.94484	12.2344	9.45733	9.44349	10.3784	0.951997	1
FBgn0000337	cn	2R	3670302	0.174862	0.272718	0	0.149193	0.148727	0	0	0.0495757	0.280664	0	0.267813	0.182826	0	0	0.05104	0.0170133	0	0	0	0	0	0.189755	0	0.0632517	0	0.115619	0.125182	0.080267	0.150274	0.163226	0	0.1045	0	0	0.0901038	0.0300346	0	0.165949	0.174041	0.11333	0.177576	0	0.175089	0.117555	0.385264	1
FBgn0000339	cni	2L	16309594	29.5975	29.3794	23.7033	27.5601	25.8362	24.2479	23.0151	24.3664	25.9846	21.7586	32.0591	26.6008	22.9747	20.4334	18.4972	20.6351	23.0634	24.9101	22.3672	23.4469	22.0289	19.703	20.2481	20.66	23.7033	22.397	21.2092	22.4365	31.2214	30.7707	30.2578	30.75	30.0561	28.2937	24.7043	27.6847	32.0098	28.2062	27.7398	29.3186	32.0053	32.1629	36.6336	33.6006	0.29791	1
FBgn0000346	comt	X	13153030	44.7798	55.6086	55.6175	52.002	56.3051	51.6341	46.6022	51.5138	46.5165	53.8803	54.1927	51.5298	53.6141	46.0752	50.2961	49.9951	47.9814	51.215	49.3533	49.5166	58.5232	56.2865	57.1957	57.3351	55.6175	60.8555	52.4512	56.3081	51.2269	55.7091	55.8045	54.2468	37.4769	40.0938	35.4698	37.6802	59.8026	50.3062	65.3527	58.4872	53.9475	47.8408	60.2286	54.0056	0.459981	1
FBgn0000351	cort	2L	6674637	0.425053	0	0	0.141684	0.180746	0.428853	0.209637	0.273079	0	0.202671	0	0.067557	0	0.0741506	0.0620283	0.045393	0	0	0.0734092	0.0244697	0.393868	0.230607	0	0.208158	0	0.281045	0	0.0936817	0.182641	0.297584	0.280237	0.253487	0.172019	0.184761	0.109502	0.155427	0.102282	0.100838	0.211527	0.138216	0.647513	0.115219	0.212802	0.325178	1	1
FBgn0000352	cos	2R	3269669	3.60494	3.47261	4.16957	3.74904	5.11022	4.63561	6.13626	5.29403	4.0276	4.31443	5.08817	4.47673	4.36748	3.82295	3.75504	3.98182	3.86389	3.80066	3.19871	3.62109	3.93029	4.52561	4.56379	4.3399	4.16957	4.48677	4.45304	4.36979	4.43444	4.6187	4.1941	4.41575	3.51857	4.27082	3.31449	3.70129	3.8444	3.48826	4.11565	3.8161	4.73762	3.64082	3.85734	4.07859	0.387829	1
FBgn0000355	Cp15	3L	8721581	0	0.51075	0	0.17025	0	0	0	0	0	0	0	0	1.0594	0.685617	0.382354	0.709124	0	0	0	0	0	0	0	0	0	0	0	0	0	0	0.287872	0.0959573	0.265066	0	0	0.0883553	0	0.621583	0	0.207194	0	0	0	0	1	1
FBgn0000356	Cp16	3L	8725044	0	0.503901	0	0.167967	0	0	0	0	0	0	0	0	0	0.225474	0	0.075158	0	0	0	0	0	0	0	0	0	0	0	0	0	0	0	0	0	0	0	0	0	0.306624	0	0.102208	0	0	0	0	1	1
FBgn0000357	Cp18	3L	8719891	0.519737	0	0.958069	0.492602	0.442055	0.524384	0.512716	0.493052	0	1.48703	1.19402	0.893683	0.336267	0.906761	0.758523	0.667184	0.487039	0.186305	0.179539	0.284294	0	0.564002	1.19846	0.587487	0.958069	1.71826	0.372075	1.01613	0.223327	0.242576	0.685303	0.383735	0.210337	0	0	0.0701123	0.250153	0.493244	0.258648	0.334015	0.791704	0.563587	0.260206	0.538499	0.465458	1
FBgn0000358	Cp19	3L	8722965	0	0	0	0	0.440697	0	0	0.146899	0	0	0	0	0.838084	0	0.151238	0.329774	0.485543	0.185732	0.357975	0.343083	0	0.562269	0.597389	0.386553	0	0.342596	0.741863	0.361486	0	0.241831	0	0.0806103	0	0	0	0	0	0.737592	0	0.245864	0	0	0	0	1	1
FBgn0000359	Cp36	X	8373352	0	0	0	0	0	0	0	0	0	0	0	0	0.293329	0.84371	0.176445	0.437828	0	0	0	0	0	0	0	0	0	0	0	0	0	0	0	0	0	0	0	0	0	1.43421	0	0.47807	0	0	0	0	1	1
FBgn0000360	Cp38	X	8375870	0	0	0	0	0	0	0	0	0	0	0	0	0.883148	0.471176	0.265615	0.53998	0	0	0	0	0	0	0.349713	0.116571	0	0	0	0	0	0	0	0	0	0	0	0	0	1.29542	0	0.431807	0	0	0	0	1	1
FBgn0000370	crc	2L	21310866	447.693	433.615	435.764	439.024	488.018	458.363	454.764	467.048	488.797	479.315	474.567	480.893	410.647	416.986	427.131	418.255	435.154	422.622	408.437	422.071	349.728	344.156	359.446	351.11	435.764	390.222	396.498	407.495	588.205	536.179	540.178	554.854	468.532	500.996	508.725	492.751	531.941	507.877	525.303	521.707	552.548	556.257	568.628	559.144	0.224543	1
FBgn0000376	crm	X	2628277	2.67418	2.84999	4.77615	3.43344	4.18152	5.57611	3.63491	4.46418	3.16816	3.59764	3.68614	3.48398	4.08665	3.73247	3.902	3.90704	3.4802	4.11952	3.12137	3.5737	3.63466	2.95121	5.15987	3.91525	4.77615	3.48373	4.08218	4.11402	3.24195	3.24514	3.5261	3.33773	2.63347	3.35149	3.67461	3.21986	3.92681	3.53841	4.19111	3.88544	3.93778	3.75757	3.83978	3.84504	0.260415	1
FBgn0000377	crn	X	2141627	6.51177	7.10909	8.40253	7.34113	7.01542	7.88399	8.85056	7.91666	6.73557	8.69445	5.87311	7.10104	5.43018	5.04923	6.54685	5.67542	6.5993	6.38016	6.64833	6.5426	8.31425	10.8351	8.67559	9.27498	8.40253	6.98464	8.28748	7.89155	8.26982	7.09152	8.07732	7.81289	7.90592	7.17067	5.59235	6.88965	7.24338	7.27847	9.00162	7.84116	9.11099	7.06116	7.60692	7.92636	0.531096	1
FBgn0000382	csw	X	1988269	55.3218	62.4609	57.8611	58.5479	64.7876	62.6581	58.329	61.9249	53.6128	68.1399	61.1961	60.9829	61.1091	54.1853	59.4717	58.2554	58.1922	57.9236	58.8414	58.3191	62.7055	58.8755	63.5406	61.7072	57.8611	59.1725	60.3561	59.1299	58.0786	58.4398	62.9959	59.8381	39.982	45.9403	50.1862	45.3695	64.7815	54.5674	67.6165	62.3218	55.0702	54.0125	56.9205	55.3344	0.986736	1
FBgn0000384	cta	2L	22874534	11.7864	14.5124	10.2916	12.1968	10.2886	10.3271	12.1627	10.9261	12.3215	12.4241	10.5104	11.752	11.6895	11.7427	12.2901	11.9074	10.8754	11.9522	10.3663	11.0646	7.47339	7.99392	11.3541	8.94047	10.2916	11.7924	10.9358	11.0066	13.661	14.6574	13.837	14.0518	7.62567	10.9545	12.1068	10.229	14.6674	11.7376	13.0817	13.1622	13.5443	13.7058	13.9757	13.7419	0.244729	1
FBgn0000392	cup	2L	6663965	0.274662	0.21472	0.253788	0.247723	0.394485	0.565485	0.373761	0.444577	0.735343	0.911623	0.214815	0.620594	0.472984	0.383013	0.190787	0.348928	0.635783	0.498324	0.682977	0.605695	0.168339	0.903665	0.416206	0.49607	0.253788	0.611308	0.0668084	0.310635	0.724694	0.38675	0.48425	0.531898	0.550085	0.956041	0.759338	0.755155	0.174588	0.573444	0.365561	0.371198	0.558897	0.600424	0.183036	0.447452	1	1
FBgn0000394	cv	X	5584029	12.2561	13.2973	12.2786	12.6107	14.2012	15.2331	15.9455	15.1266	18.2462	16.0932	14.6904	16.3433	11.6071	12.7056	13.0134	12.442	12.1508	13.4983	12.9468	12.8653	20.4113	12.3362	15.3594	16.0356	12.2786	12.2144	12.716	12.403	14.5016	14.0105	13.4279	13.98	13.5862	13.5889	15.102	14.0924	14.8756	13.6542	11.8449	13.4582	13.258	12.5197	11.2049	12.3275	0.398651	1
FBgn0000395	cv-2	2R	17242520	5.22296	4.13369	4.02358	4.46008	5.83468	4.32584	4.22958	4.7967	3.75364	3.5686	4.59661	3.97295	4.36272	3.99851	3.73164	4.03096	3.70121	3.40911	4.01239	3.70757	3.61207	3.12997	3.77486	3.50563	4.02358	4.69048	3.62745	4.11384	3.91909	4.40241	4.1115	4.14433	2.90243	3.28687	2.61097	2.93342	4.27729	3.1072	4.26736	3.88395	3.64156	3.16993	4.41015	3.74055	0.189788	1
FBgn0000404	CycA	3L	11819819	0.174047	0.55375	0.802095	0.509964	0.983865	0.233429	0.456452	0.557915	0.464183	0.773162	0.354329	0.530558	0.44905	0.68619	0.812847	0.649362	0.616526	0.636236	0.479545	0.577436	0.643191	0.859571	1.43767	0.980144	0.802095	0.619083	0.124598	0.515259	0.305129	0.308082	0.391342	0.334851	0.357715	0.286927	0.417735	0.354126	0.445845	0.751748	0.547582	0.581725	1.34577	0.501255	0.793135	0.880053	1	1
FBgn0000405	CycB	2R	18691026	0.264719	0.197257	0.582899	0.348292	0.112558	0.400651	0.13055	0.214586	0.304512	0.126212	0.19371	0.208145	0.171286	0.266785	0.23183	0.2233	0.355155	0.142344	0.182905	0.226801	0	0.287264	0.152577	0.146614	0.582899	0.875283	0.473822	0.644001	0.272034	0.0617659	0.389198	0.240999	0.267856	0.115068	0.391043	0.257989	0	0.553833	0.190934	0.248256	1.15464	0.274308	0.443329	0.624092	1	1
FBgn0000406	Cyt-b5-r	2L	16788774	246.209	228.584	225.836	233.543	319.987	333.218	303.287	318.831	272.676	196.817	239.202	236.232	250.34	240.239	194.692	228.424	283.647	283.184	287.464	284.765	191.631	186.201	198.358	192.063	225.836	201.29	201.287	209.471	576.966	483.055	328.422	462.814	449.74	436.42	360.463	415.541	463.25	474.087	266.673	401.337	495.946	283.029	154.398	311.124	0.0015272	0.114591
FBgn0000409	Cyt-c-p	2L	16719874	201.759	214.894	192.144	202.932	229.439	227.034	221.1	225.858	220.797	189.86	195.271	201.976	240.958	247.259	244.965	244.394	214.498	200.13	206.616	207.081	308.443	318.462	318.238	315.048	192.144	266.512	267.097	241.918	234.325	224.664	199.769	219.586	235.36	204.375	194.787	211.507	197.446	196.145	170.311	187.967	235.329	219.752	246.591	233.891	0.738462	1
FBgn0000411	D	3L	14168701	4.64963	3.00149	3.22508	3.6254	6.6962	4.94249	2.58947	4.74272	5.75704	4.00454	4.68916	4.81691	4.41456	3.78488	5.00452	4.40132	5.08236	3.95098	4.41218	4.48184	5.5125	3.60723	4.1514	4.42371	3.22508	4.0488	4.0343	3.76939	4.36021	3.6745	4.61373	4.21615	3.12869	3.118	3.26906	3.17192	3.11563	3.98507	4.26622	3.78897	3.99754	4.1737	4.99265	4.38796	0.782318	1
FBgn0000412	D1	3R	5063805	45.9083	40.7891	41.6765	42.7913	43.1966	41.0196	39.4444	41.2202	38.7454	46.062	37.3968	40.7347	38.3291	37.8071	34.4813	36.8725	36.4421	36.0257	40.8964	37.7881	39.4221	44.4247	48.4443	44.097	41.6765	46.9472	40.2516	42.9584	43.7445	38.2062	31.1634	37.7047	28.7318	36.1637	30.4892	31.7949	39.8173	32.776	38.2354	36.9429	38.2251	31.3724	35.8086	35.1354	0.760699	1
FBgn0000413	da	2L	10388105	14.7265	16.0589	15.0576	15.281	16.3719	15.7724	15.6635	15.9359	14.6738	17.9172	14.1388	15.5766	14.0391	14.7293	15.5208	14.7631	15.8778	15.882	16.1106	15.9568	19.8429	16.6846	16.1617	17.5631	15.0576	16.1547	15.2254	15.4792	14.1507	14.0044	13.4697	13.8749	12.2417	11.284	11.2409	11.5889	14.9625	13.8433	15.8891	14.8983	12.1462	12.5935	13.4794	12.7397	0.822094	1
FBgn0000414	Dab	3L	16705226	13.0031	13.7633	14.4359	13.7341	17.1153	15.3486	12.9971	15.1537	10.3235	15.7562	15.6911	13.9236	14.4105	11.0656	13.7585	13.0782	13.7091	13.6906	13.4826	13.6274	15.2679	12.4567	13.5985	13.7744	14.4359	15.4221	15.1615	15.0065	16.2468	16.5301	18.856	17.211	12.8755	14.9453	14.5561	14.1256	18.0255	14.5931	18.4873	17.0353	14.8947	12.5002	14.7944	14.0631	0.620333	1
FBgn0000416	Sap-r	3R	26709186	268.499	269.134	259.143	265.592	278.913	268.204	269.5	272.206	259.875	262.874	253.844	258.864	210.016	224.003	218.795	217.605	218.633	239.177	224.157	227.322	246.376	243.848	230.568	240.264	259.143	246.813	242.699	249.552	320.784	305.662	279.281	301.909	288.287	265.796	268.195	274.093	286.758	289.841	271.323	282.641	296.488	231.533	213.698	247.24	0.797049	1
FBgn0000422	Ddc	2L	19116480	34.8648	37.9676	30.7732	34.5352	42.5081	46.6214	40.7885	43.306	36.2402	45.4597	40.0954	40.5984	39.2342	38.1958	38.6676	38.6992	31.158	35.4091	39.0052	35.1908	33.7292	35.8696	40.3691	36.656	30.7732	36.3096	36.2101	34.431	35.3752	42.4365	37.1244	38.312	27.8069	32.8469	29.9397	30.1978	41.165	34.6039	41.2245	38.9978	29.4981	27.9496	36.3853	31.2777	0.759985	1
FBgn0000426	SmF	2R	8071349	7.84441	7.95226	5.78406	7.19358	8.67354	10.2889	6.19075	8.3844	10.0726	6.73314	7.80925	8.205	6.09033	8.48517	5.7242	6.76657	6.37077	5.6238	4.87762	5.62406	11.6312	10.215	3.61767	8.48796	5.78406	5.70542	2.80787	4.76578	8.76378	4.02733	8.96419	7.25177	9.84134	6.47862	7.27577	7.86524	5.28579	6.32786	6.24604	5.95323	9.55937	6.37967	8.64004	8.19303	1	1
FBgn0000427	41609	X	7761232	0	0.0727939	0	0.0242646	0	0	0	0	0	0	0	0	0	0	0	0	0	0	0	0	0	0	0	0	0	0	0	0	0	0	0	0	0	0.0405767	0	0.0135256	0	0	0	0	0	0	0	0	1	1
FBgn0000439	Dfd	3R	2617558	11.4405	9.59286	7.70998	9.58111	10.1491	13.6527	9.95103	11.2509	11.3532	10.4416	11.116	10.9703	8.71515	9.35743	8.43808	8.83689	6.68604	8.99562	9.09389	8.25852	7.75202	8.81053	9.219	8.59385	7.70998	7.72715	6.78107	7.40607	8.45744	8.95673	9.62406	9.01274	6.37241	6.41669	6.27542	6.35484	7.34184	8.46402	9.67259	8.49282	8.43243	6.60303	9.11498	8.05015	0.9227	1
FBgn0000442	Pkg21D	2L	786153	0.914118	1.73117	1.44434	1.36321	1.99926	0.527024	2.31883	1.61504	1.57201	3.73629	2.20005	2.50278	1.60531	0.820192	1.71527	1.38026	1.91717	1.68518	1.48865	1.697	1.21018	1.13368	1.35505	1.23297	1.44434	1.38152	0.747894	1.19125	1.40282	1.95037	1.54969	1.63429	1.74402	2.0435	1.74954	1.84569	1.82274	1.17735	1.62468	1.54159	1.25984	1.91168	1.83061	1.66738	0.101472	1
FBgn0000447	Dhod	3R	4477113	11.7782	10.54	12.0107	11.443	12.3624	10.6193	8.40532	10.4623	7.24011	11.2328	8.44382	8.97224	11.5928	9.88092	9.58228	10.352	9.23684	10.3305	11.6124	10.3932	11.1473	11.9655	10.9793	11.364	12.0107	10.7701	10.0466	10.9425	12.5987	9.94182	12.226	11.5888	10.1491	11.431	11.3557	10.9786	12.5441	11.7724	12.2323	12.1829	11.6937	10.4621	12.1841	11.4466	0.395389	1
FBgn0000448	Hr46	2R	6091617	13.7519	15.0521	14.26	14.3547	16.2941	17.9509	14.5692	16.2714	12.8731	16.9211	16.6071	15.4671	16.9374	14.6063	13.9927	15.1788	15.1446	15.2683	15.4744	15.2958	13.2861	13.079	15.0658	13.8103	14.26	16.6203	13.5696	14.8166	12.3128	11.7762	12.5094	12.1995	7.8397	10.3939	10.4167	9.5501	15.6844	10.3165	15.0451	13.682	11.3032	10.6357	12.6697	11.5362	0.650115	1
FBgn0000449	dib	3L	4062304	0	0.133183	0	0.0443943	0	0	0	0	0	0	0	0	0	0	0	0	0	0	0	0	0	0	0	0	0	0	0	0	0	0	0	0	0	0	0	0	0	0	0	0	0	0	0	0	1	1
FBgn0000451	ect	3L	10183376	1.15671	0.650543	0.591326	0.799526	0.354777	0.315051	0.548645	0.406158	0.734121	0.530412	0.532405	0.598979	0.475105	0.529549	0.668641	0.557765	0.669221	0.795657	0.637449	0.700776	0.578749	0.301763	0.543567	0.474693	0.591326	0.741993	0	0.44444	0.600623	0.291492	0.366667	0.419594	0.292467	0.573332	1.34805	0.73795	0.401523	0.51956	0.581285	0.500789	0.675405	0.169302	0.236035	0.360247	0.497425	1
FBgn0000454	Dip-B	3R	9608012	30.1673	25.9191	29.7004	28.5956	32.2675	32.0585	26.1912	30.1724	25.4507	27.3556	28.3555	27.0539	25.1426	27.5337	24.1338	25.6034	22.026	24.512	23.2374	23.2585	28.0054	28.2157	31.3223	29.1811	29.7004	30.0075	26.1914	28.6331	27.4789	24.7768	21.491	24.5822	28.0256	21.1477	22.8284	24.0006	25.949	22.1358	23.0411	23.7086	26.7907	22.2066	23.5331	24.1768	0.400556	1
FBgn0000455	Dip-C	3R	8237531	6.29178	7.08699	8.3764	7.25172	10.5541	8.99306	12.2412	10.5961	10.3792	6.83393	9.77012	8.99442	9.66801	7.257	9.69258	8.87253	7.31534	9.02139	6.8222	7.71964	10.3656	9.86214	7.25409	9.16061	8.3764	7.04913	8.00751	7.81101	11.0394	10.5226	10.5237	10.6952	13.1558	10.7877	10.3566	11.4334	10.0101	9.7859	9.74123	9.84574	9.49539	8.81254	8.66243	8.99012	0.381124	1
FBgn0000459	disco	X	16104631	17.0632	15.0911	13.9071	15.3538	14.3559	15.9689	13.5521	14.6256	20.1234	21.0363	17.2098	19.4565	10.3513	9.54722	9.68903	9.86252	14.4023	15.1497	15.7114	15.0878	14.5392	11.3207	10.8779	12.2459	13.9071	12.4868	11.3218	12.5719	15.0671	20.8159	17.2861	17.723	15.2027	13.4322	16.8342	15.1564	12.9232	16.4118	13.048	14.1277	12.2427	17.3183	11.4597	13.6736	0.000205741	0.0232117
FBgn0000463	Dl	3R	15128453	3.95159	3.51646	2.67008	3.37938	3.45984	3.81564	3.20495	3.49348	2.78603	3.04162	2.81034	2.87933	2.69851	3.30286	2.86177	2.95438	3.0175	3.15786	1.85587	2.67708	2.86364	3.7642	2.54904	3.05896	2.67008	2.78305	2.20989	2.55434	3.42249	3.00445	2.92419	3.11704	2.2295	2.31297	3.09033	2.54427	3.49693	2.49206	3.75963	3.24954	3.36952	3.31405	2.94701	3.21019	0.263935	1
FBgn0000464	Lar	2L	19586623	19.7862	22.6597	21.1834	21.2098	27.8692	27.3842	24.0743	26.4426	20.3695	26.0872	24.818	23.7582	25.4444	23.1204	23.3072	23.9573	23.181	24.3709	24.7928	24.1149	24.6146	24.1281	24.7999	24.5142	21.1834	26.6837	26.6359	24.8343	19.3789	22.2945	24.0405	21.9046	15.2428	18.3977	16.0977	16.5794	24.6909	20.6188	26.8741	24.0613	18.7231	16.5641	23.5368	19.608	0.497824	1
FBgn0000473	Cyp6a2	2R	2667254	0.402998	0.314261	0.928595	0.548618	4.28456	4.26932	2.78288	3.77892	3.07246	3.65125	6.6351	4.45294	1.49924	2.88268	4.11705	2.83299	2.95821	5.12828	2.71464	3.60038	0.373463	0.874641	0.929271	0.725792	0.928595	1.06585	1.29826	1.09757	6.75345	5.54867	6.6422	6.31477	3.5065	3.85385	4.15317	3.83784	2.90949	1.62544	1.10304	1.87932	1.43238	1.63874	0.907922	1.32635	0.548465	1
FBgn0000477	DNaseII	3R	13845099	67.8465	69.4005	60.2546	65.8339	55.3696	64.0189	54.1942	57.8609	66.5728	57.1086	69.6248	64.4354	45.1402	49.5518	42.7339	45.8086	56.6282	55.4343	56.1729	56.0785	46.3283	53.3556	44.9705	48.2181	60.2546	50.4905	51.7169	54.154	82.03	66.5367	49.7399	66.1022	122.947	90.504	86.622	100.024	75.622	76.5096	56.0452	69.3923	90.378	82.6552	67.3844	80.1392	0.0882965	1
FBgn0000479	dnc	X	3070475	39.2417	39.8941	34.7	37.9453	44.0501	53.2936	39.1218	45.4885	36.2831	42.396	41.3865	40.0219	41.8774	33.7934	39.6394	38.4367	35.345	36.2825	33.8703	35.1659	49.7839	40.6391	40.8014	43.7415	34.7	43.0458	43.4905	40.4121	32.8537	35.6206	34.8579	34.4441	23.1088	27.4286	25.9423	25.4932	36.72	31.1803	43.1228	37.0077	31.0365	30.5498	40.2688	33.9517	0.486589	1
FBgn0000482	dor	X	1559088	2.99071	3.66485	3.44562	3.36706	3.63387	2.69415	4.42546	3.58449	3.00016	2.85226	3.02638	2.9596	4.00815	2.49707	3.14885	3.21802	3.80347	3.13957	3.17314	3.37206	3.56339	4.28859	4.67961	4.1772	3.44562	3.67244	3.51739	3.54515	3.85526	4.18755	4.55371	4.19884	4.14973	2.275	2.91702	3.11392	3.75285	4.56149	3.93344	4.08259	3.90487	4.16961	3.95714	4.01054	0.49945	1
FBgn0000489	Pka-C3	3L	15918904	21.8865	21.9969	20.604	21.4958	22.9953	27.6323	27.5947	26.0741	20.6641	24.6685	23.9305	23.0877	23.1558	21.808	24.2018	23.0552	18.0494	20.4908	20.602	19.7141	24.5127	22.7345	28.6075	25.2849	20.604	21.6684	25.2201	22.4975	19.9906	19.8703	22.2235	20.6948	12.1603	16.5698	16.016	14.9154	20.843	17.106	24.0553	20.6681	16.4889	17.1256	21.9618	18.5254	0.291411	1
FBgn0000490	dpp	2L	2428372	9.0586	7.38713	5.35678	7.2675	8.94589	8.69188	10.4156	9.35112	8.91127	7.12628	6.75692	7.59816	6.77917	8.66555	7.04691	7.49721	7.55124	7.81619	7.02226	7.46323	7.01045	4.87493	7.87403	6.58647	5.35678	7.05608	5.11131	5.84139	5.34827	6.45088	5.9501	5.91642	3.784	4.65689	5.36096	4.60062	5.38788	5.48728	6.53693	5.80403	4.76558	4.77731	5.19586	4.91292	0.216185	1
FBgn0000492	Dr	3R	25382109	4.68485	3.95772	3.95813	4.20023	4.9808	6.30232	5.90533	5.72948	5.84846	5.46086	6.27827	5.86253	4.04143	4.99488	5.2039	4.74674	7.9266	8.21006	5.79907	7.31191	4.8239	3.81289	3.30085	3.97921	3.95813	4.64646	4.56495	4.38985	6.31873	4.31237	3.94657	4.85922	7.89982	8.99413	4.69395	7.19597	5.7624	4.32254	4.20951	4.76482	6.01302	5.43289	4.49548	5.3138	0.722466	1
FBgn0000497	ds	2L	640021	1.22371	1.54802	1.20307	1.32493	1.57278	1.31696	1.87784	1.58919	1.68042	1.76356	1.58265	1.67554	1.25798	1.06273	1.20649	1.17573	1.3251	1.19898	1.2118	1.24529	1.15923	0.76725	0.815173	0.913884	1.20307	1.18671	0.953914	1.11456	1.36713	0.977285	1.62549	1.3233	0.902429	1.07566	1.35921	1.11243	0.85075	1.0581	1.25856	1.0558	1.00797	1.12054	0.939397	1.02264	0.307163	1
FBgn0000499	dsh	X	11249914	7.59065	8.41642	8.08935	8.03214	11.1973	8.61583	7.0201	8.94441	7.99536	9.84087	7.44764	8.42796	7.55849	6.53875	7.54693	7.21472	7.85405	8.58797	7.41571	7.95258	8.35329	10.2964	7.24743	8.63237	8.08935	7.60686	6.70768	7.46796	6.01366	6.7534	7.45439	6.74048	5.71187	4.84613	5.19475	5.25092	6.62184	5.79674	6.31549	6.24469	6.20289	4.75858	7.3036	6.08836	0.838079	1
FBgn0000500	Dsk	3R	15414	83.5864	98.4653	86.8753	89.6423	73.6143	87.3243	80.118	80.3522	91.3435	89.8936	85.7993	89.0121	69.4216	62.8824	72.6742	68.3261	67.4025	64.8121	60.6154	64.2767	58.2327	85.5588	72.4489	72.0801	86.8753	83.8812	75.9653	82.2406	78.4558	72.2139	82.3343	77.668	66.2152	55.6594	57.1221	59.6656	69.619	73.4183	80.5385	74.5253	76.1543	86.4601	108.032	90.2155	0.101854	1
FBgn0000504	dsx	3R	3750045	11.9957	9.08873	9.81873	10.3011	10.8491	9.01527	8.48157	9.44865	12.3848	12.7739	11.78	12.3129	11.4591	11.8885	10.2288	11.1921	15.2721	15.0375	15.7352	15.3483	10.0986	11.6632	10.9377	10.8998	9.81873	9.83915	8.74424	9.46737	10.5994	11.1266	9.79237	10.5061	12.3622	14.0374	17.7263	14.7086	12.9771	11.0672	12.1317	12.0587	11.5457	10.6884	11.3548	11.1963	0.00274263	0.171576
FBgn0000520	dwg	X	2621733	2.84297	2.60819	3.85341	3.10152	3.12923	3.88076	2.47461	3.16153	3.75786	2.55187	2.04903	2.78625	2.21808	2.39246	2.73354	2.44803	3.02977	2.39785	1.84862	2.42541	5.26922	3.26657	1.34968	3.29516	3.85341	2.98553	2.75357	3.1975	3.88038	3.74652	2.27857	3.30182	2.70717	2.76233	2.58518	2.68489	2.49521	3.17417	3.32895	2.99944	2.54743	2.26678	3.60018	2.8048	0.525098	1
FBgn0000524	dx	X	6428043	3.26372	3.64564	3.65853	3.52263	3.60118	2.93691	3.39366	3.31058	3.82265	4.03801	3.78272	3.88113	2.99619	2.86242	2.5232	2.79394	3.60945	3.00382	2.10249	2.90525	3.10627	3.82884	3.45779	3.4643	3.65853	3.32445	3.15738	3.38012	3.03221	3.95226	2.55877	3.18108	3.5341	2.76065	3.09077	3.12851	3.09924	3.22292	2.76551	3.02922	3.35915	3.25212	2.56137	3.05755	0.191067	1
FBgn0000527	e	3R	17055561	5.68801	6.94623	9.29812	7.31079	9.03675	7.36307	7.09336	7.83106	6.11509	6.34587	6.16384	6.20827	6.56169	5.24265	5.388	5.73078	4.2239	5.19347	4.93072	4.7827	5.3706	6.40536	6.18676	5.98757	9.29812	4.96726	5.30126	6.52221	8.48516	6.3113	4.9528	6.58309	3.69178	7.23077	4.25816	5.06024	5.21708	4.63418	4.91356	4.92161	5.28584	3.7822	4.08348	4.38384	0.0369736	0.880028
FBgn0000529	bsh	2L	19765776	1.20702	0.522949	0.473558	0.734509	1.24672	0.545932	1.81923	1.20396	1.85552	1.93819	1.24135	1.67835	1.13891	0.994475	1.01277	1.04872	0.802549	1.20191	0.810787	0.938415	0.952285	0.545783	1.80534	1.10114	0.473558	1.66275	0.554604	0.896971	0.504262	0.860797	1.40418	0.92308	0.679055	0.947356	0.494752	0.707054	1.03008	1.48629	1.50177	1.33938	1.2769	0.454485	0.270898	0.667428	1	1
FBgn0000533	ea	3R	11154452	7.05668	7.52056	7.15445	7.2439	6.80223	9.01839	10.6741	8.83157	6.98459	8.74901	7.38531	7.7063	7.00063	5.33497	4.87475	5.73678	6.53925	6.74543	6.09418	6.45962	6.10355	7.40243	6.77999	6.76199	7.15445	7.7765	7.74611	7.55902	8.79339	7.79474	7.44371	8.01061	6.85401	7.055	5.81791	6.57564	7.35893	6.58535	6.43823	6.79417	5.85239	5.86657	9.18559	6.96818	0.308635	1
FBgn0000535	eag	X	14849510	9.67784	12.9368	11.8418	11.4855	16.205	16.2159	12.8778	15.0996	11.3048	15.2477	13.3846	13.3124	15.3292	13.235	13.5677	14.044	13.1519	13.3175	13.8243	13.4312	14.153	11.7274	12.0065	12.629	11.8418	14.0634	13.4028	13.1027	10.9132	12.3551	14.5259	12.5981	7.31366	10.0336	9.35861	8.90196	15.6176	11.5558	15.4078	14.1937	9.81614	9.56953	12.5968	10.6608	0.341404	1
FBgn0000536	eas	X	16172360	71.0854	70.7649	67.3952	69.7485	68.782	70.3498	67.7989	68.9769	85.3488	81.4403	85.1167	83.9686	67.2018	68.3889	73.0494	69.5467	85.2362	92.2529	83.3799	86.9563	58.3753	63.5125	56.3878	59.4252	67.3952	70.5731	68.0398	68.6694	124.868	110.2	77.445	104.171	138.531	133.634	138.974	137.046	128.172	104.849	88.7041	107.242	103.382	90.597	78.1289	90.7026	0.000615856	0.0574872
FBgn0000541	E(bx)	3L	233926	21.3639	22.5338	21.6577	21.8518	22.6379	23.0853	22.3743	22.6992	18.1718	23.1343	21.1025	20.8029	23.4798	21.1021	21.2832	21.955	20.733	21.3195	21.7045	21.2523	22.492	18.1927	22.6618	21.1155	21.6577	21.6248	19.8191	21.0339	18.1571	20.6875	22.5041	20.4496	12.7927	16.2164	16.8671	15.2921	22.4867	18.1732	25.9503	22.2034	19.0899	18.0575	21.035	19.3941	0.394739	1
FBgn0000542	ec	X	3705684	1.74985	1.2115	0.833409	1.26492	0.968282	1.36191	1.8271	1.38576	1.31536	1.14974	1.10715	1.19075	1.19521	0.951026	1.05675	1.06766	1.04614	0.760124	0.965068	0.923777	1.10813	1.24022	1.38337	1.24391	0.833409	1.46187	0.858968	1.05142	1.23764	0.977696	1.33693	1.18409	0.825503	0.882636	1.1251	0.944413	1.29852	1.0169	1.02522	1.11355	1.00658	1.08842	1.02403	1.03968	0.536973	1
FBgn0000543	ecd	3L	2263581	6.88699	5.25118	6.34764	6.16194	5.5973	6.17651	7.69981	6.49121	5.527	5.25454	6.79752	5.85969	5.49553	5.39358	5.31592	5.40168	4.06345	5.48601	5.33966	4.96304	7.94237	8.47001	6.70517	7.70585	6.34764	6.77995	6.24508	6.45756	7.49687	6.35727	4.9104	6.25485	5.51239	5.72116	5.20484	5.47946	6.77683	5.44661	6.62614	6.28319	4.818	4.72976	6.35958	5.30245	0.760463	1
FBgn0000546	EcR	2R	1977924	15.828	16.713	14.8274	15.7895	19.4487	17.9427	17.031	18.1408	15.5589	16.7759	17.8463	16.727	18.7174	21.2059	20.1196	20.0143	18.148	18.0711	19.4896	18.5696	17.101	16.932	15.4447	16.4926	14.8274	16.2619	16.0497	15.713	12.4971	14.7047	14.7036	13.9685	8.51569	10.6995	10.4055	9.87356	15.2608	13.2349	17.7614	15.419	13.1075	12.9787	12.8818	12.9893	0.579595	1
FBgn0000547	ed	2L	4031379	20.407	19.892	18.0981	19.4657	23.1089	24.4201	21.77	23.0997	18.8528	22.2912	19.4888	20.2109	20.8603	17.7809	18.1294	18.9235	18.5302	19.8401	18.0335	18.8013	22.4299	15.7719	19.2877	19.1632	18.0981	18.8277	15.8833	17.603	17.7414	17.8308	20.7023	18.7582	13.4684	13.641	14.3364	13.8153	18.1879	16.5519	20.1931	18.311	15.6633	16.5966	17.6714	16.6438	0.222076	1
FBgn0000551	Edg78E	3L	21289863	0.348821	0.272013	0.321503	0.314112	0	1.05582	0	0.35194	0	0	0	0	0.451369	0.121714	0.101816	0.224966	0	0.125038	0.602486	0.242508	0	0.378529	0	0.126176	0.321503	0	0.249717	0.190407	0.149886	0	0	0.049962	0.282335	0	0	0.0941117	0	0.331039	0.520772	0.283937	0	0.189125	0.174637	0.121254	0.269181	1
FBgn0000552	Edg84A	3R	2510172	0	0	0	0	0	0	0.534113	0.178038	0	0	0	0	0	0	0	0	0	0	0	0	0	0	0	0	0	0	0	0	0	0	0	0	0	0	0	0	0	0	0	0	0	0	0	0	1	1
FBgn0000556	Ef1alpha48D	2R	7778901	4640.89	4085.36	4162.16	4296.14	3742.07	3876.89	3724.55	3781.17	4406.04	4017.54	3862.27	4095.28	2885.3	3056.55	3182.58	3041.48	3709.57	3684.48	3694.31	3696.12	4127.02	4051.88	4016.53	4065.14	4162.16	3743.33	3865.16	3923.55	4649.81	4461.88	3853.36	4321.68	5066.93	4428.15	4565.96	4687.01	4576.67	4621.01	3943.17	4380.28	4825.84	4504.58	3959.12	4429.85	0.0488847	0.970925
FBgn0000557	Ef1alpha100E	3R	27564190	199.027	212.251	221.399	210.892	259.202	221.597	222.196	234.332	203.045	244.329	232.39	226.588	192.693	167.575	210.964	190.411	215.537	213.787	194.77	208.031	241.36	221.22	233.919	232.166	221.399	249.628	227.991	233.006	220.222	218.903	227.042	222.056	172.683	190.648	169.335	177.555	232.831	211.24	214.568	219.546	208.488	178.351	202.372	196.404	0.8862	1
FBgn0000559	Ef2b	2L	21678097	1133.47	1044.7	1063.83	1080.67	987.068	991.877	1009.28	996.075	1073.74	1034.98	983.637	1030.79	860.133	866.996	939.358	888.829	970.034	983.873	958.535	970.814	1115.68	1065.66	1104.42	1095.25	1063.83	1033.17	1040.86	1045.95	1199.09	1167.51	1084.21	1150.27	1295.88	1142.88	1183.05	1207.27	1202.46	1208.33	1093.42	1168.07	1278.26	1219.38	1062	1186.55	0.224631	1
FBgn0000560	eg	3L	21801803	0	0.350008	0	0.116669	0.159386	0	0.228802	0.129396	0	0	0.521367	0.173789	0.546819	0.130776	0.278395	0.318663	0.292675	0.166296	0.47457	0.31118	0.347321	0.251689	0	0.19967	0	0.153356	0.16604	0.106465	0.161044	0.108251	0	0.089765	0.303437	0.100818	0.386351	0.263535	0.0901941	0.220138	0.454686	0.255006	0.476131	0	0.187638	0.221256	1	1
FBgn0000562	egl	2R	19622427	14.0291	12.6643	13.071	13.2548	14.7857	14.0777	13.6892	14.1842	12.3602	12.2162	14.8888	13.1551	12.4559	12.4508	12.4406	12.4491	12.2891	13.9661	11.7206	12.6586	13.4249	12.7418	13.5377	13.2348	13.071	14.5695	15.065	14.2352	12.253	13.8429	13.8066	13.3008	10.6763	13.1243	12.8865	12.229	13.8349	14.327	12.9008	13.6876	10.7239	12.1123	12.1006	11.6456	0.724931	1
FBgn0000564	Eh	3R	13272364	1.22747	1.72295	2.26269	1.7377	0.208802	0	0	0.0696007	0	0.23413	0	0.0780433	0	0	0.0716566	0.0238855	0.0766832	0.176	0	0.0842277	0.455006	0.532805	1.13217	0.70666	2.26269	1.13625	2.28471	1.89455	0.105487	0	0.107899	0.0711287	0	0	0	0	2.12685	2.3298	2.0769	2.17785	0.997217	2.26276	2.33522	1.86507	1	1
FBgn0000565	Eip71CD	3L	15504153	33.5633	39.2731	35.7154	36.1839	45.3098	53.7197	57.9451	52.3249	49.4704	43.8642	46.3023	46.5456	51.1532	56.3671	55.1237	54.2147	37.886	46.4662	43.3021	42.5514	47.2079	53.5504	52.5916	51.1166	35.7154	52.2967	53.3867	47.1329	63.2972	73.0332	74.766	70.3655	57.1734	51.7837	61.1846	56.7139	42.2552	58.3753	63.7834	54.8046	41.2992	53.0221	44.6789	46.3334	0.497348	1
FBgn0000566	Eip55E	2R	14515399	21.4165	25.0511	19.515	21.9942	16.7665	17.1882	17.2859	17.0802	19.1404	12.3015	14.9094	15.4504	26.0593	21.2297	25.2179	24.169	17.2564	17.0986	18.5794	17.6448	26.1618	31.6915	34.7934	30.8822	19.515	29.1258	27.8761	25.5056	22.6925	20.9	20.8582	21.4836	26.7896	24.6485	21.5695	24.3359	20.7329	24.3666	19.7414	21.6136	28.5453	24.5429	29.8514	27.6465	0.634733	1
FBgn0000567	Eip74EF	3L	17553258	6.4772	5.67046	7.02159	6.38975	6.2122	6.22303	6.49389	6.30971	5.50347	6.74907	6.08617	6.1129	6.94308	6.83756	6.88473	6.88846	6.10919	6.22238	6.1714	6.16766	6.7151	5.56956	6.77948	6.35471	7.02159	7.4051	6.65719	7.02796	5.95623	7.28359	6.02689	6.42224	4.08656	5.23399	4.95314	4.7579	7.04004	7.14428	7.64243	7.27558	6.31504	6.12349	6.08245	6.17366	1	1
FBgn0000568	Eip75B	3L	17944508	37.6543	38.6432	39.2504	38.516	48.2553	47.4091	43.757	46.4738	39.4824	41.9398	42.9184	41.4469	44.561	42.8708	44.096	43.8426	41.7277	44.0486	45.0001	43.5921	45.1065	44.3386	49.3802	46.2751	39.2504	44.7482	42.6192	42.2059	34.0473	32.6989	31.9291	32.8918	23.4511	26.3861	26.609	25.4821	39.5064	34.5281	37.2091	37.0812	31.628	32.3189	33.5724	32.5064	0.253206	1
FBgn0000575	emc	3L	749400	64.367	71.1187	67.6713	67.719	77.1491	71.2541	73.0789	73.8274	70.2843	76.1454	62.2758	69.5685	67.4202	68.2405	66.3102	67.3236	62.5286	70.2811	64.203	65.6709	60.7176	60.9169	57.6992	59.7779	67.6713	57.4718	57.6291	60.9241	66.4217	67.4598	73.729	69.2035	40.04	50.7343	54.7133	48.4959	67.2692	54.4461	75.2882	65.6678	59.5983	56.4093	68.2417	61.4164	0.755274	1
FBgn0000576	ems	3R	9727581	1.08985	1.38105	0.627814	1.0329	1.1587	1.0996	1.07513	1.11114	1.42129	1.16933	1.04324	1.21129	1.05769	0.427818	1.35198	0.945829	1.36172	1.36734	1.03532	1.25479	1.00998	0.591337	0.628271	0.743196	0.627814	1.26107	1.4629	1.11726	0.878066	1.46241	0.65864	0.999705	0.992392	1.24356	0.982772	1.07291	0.721261	0.90501	1.6271	1.08446	0.760901	1.10794	1.50049	1.12311	0.708169	1
FBgn0000577	en	2R	7411509	0.546907	1.06621	0.378055	0.663724	1.74438	0.96565	0.944163	1.21806	1.86538	1.17358	0.314107	1.11769	0.840391	0.429376	0.39909	0.556286	0.64063	0.441102	0.61401	0.565247	1.7739	0.890232	1.26112	1.30842	0.378055	0.723237	1.17453	0.758607	0.646261	0.638147	1.08169	0.788699	0.608671	0.356595	0.321697	0.428988	0.855505	0.965081	1.15673	0.992439	0.971949	0.296524	0.821432	0.696635	0.82829	1
FBgn0000578	ena	2R	15029140	8.25024	8.30288	9.32485	8.62599	12.1318	12.4163	7.90929	10.8191	9.11239	9.00908	8.773	8.96482	10.5431	9.53936	9.88182	9.98809	9.29445	9.55923	9.09766	9.31711	10.8968	7.93846	9.84502	9.56009	9.32485	8.94514	9.82571	9.36523	6.96797	8.11262	7.66838	7.58299	5.57269	5.76448	6.57281	5.96999	8.71506	6.38304	7.65255	7.58355	6.93692	6.48073	9.21377	7.54381	0.125883	1
FBgn0000579	Eno	2L	1724974	369.75	390.53	351.624	370.635	351.045	383.978	379.459	371.494	390.182	368.945	351.491	370.206	314.755	330.417	334.004	326.392	340.779	332.373	319.391	330.848	395.005	394.198	361.636	383.613	351.624	371.543	395.467	372.878	389.106	352.01	293.887	345.001	445.163	382.35	368.525	398.679	343.006	387.292	324.361	351.553	423.525	409.174	379.248	403.982	0.614248	1
FBgn0000581	E(Pc)	2R	7339548	11.916	12.3403	11.4449	11.9004	13.4196	13.9416	10.8303	12.7305	11.271	14.7134	12.4771	12.8205	12.5136	11.2371	11.7295	11.8267	11.6141	12.3952	10.9535	11.6543	12.9726	12.2176	13.0104	12.7335	11.4449	13.3967	13.2861	12.7092	13.0067	12.337	12.1193	12.4877	9.15779	10.0686	10.1321	9.78616	14.3173	11.9457	13.3712	13.2114	11.8983	10.6886	11.6619	11.4163	0.616912	1
FBgn0000588	esc	2L	11827204	2.37542	3.55037	3.83143	3.25241	3.70403	3.19554	2.34333	3.08097	3.49496	4.34212	4.09287	3.97665	3.32991	3.59171	2.77342	3.23168	3.15346	3.33501	4.23961	3.57603	4.76955	4.94064	3.42342	4.37787	3.83143	4.58101	3.40108	3.93784	3.31728	3.88036	5.65522	4.28429	3.6851	3.35577	3.77405	3.60497	5.33542	3.47543	5.31958	4.71014	3.4174	4.40038	4.06327	3.96035	0.182787	1
FBgn0000591	E(spl)m8-HLH	3R	21865977	0	0	0	0	0	0	0	0	0	0	0	0	0	0	0	0	0	0	0	0	0	0	0	0	0	0	0	0	0	0	0	0	0	0	0	0	0	0	0	0	0	0	0	0	1	1
FBgn0000592	Est-6	3L	12181935	236.937	242.933	221.71	233.86	249.299	251.225	261.556	254.027	304.363	299.575	302.207	302.048	189.129	213.76	224.74	209.21	311.923	308.642	286.566	302.377	177.206	205.356	181.828	188.13	221.71	207.234	194.638	207.861	266.454	218.369	175.599	220.141	386.779	398.383	390.431	391.864	225.531	232.367	209.252	222.383	191.623	198.442	172.587	187.551	0.000808785	0.0704632
FBgn0000594	Est-P	3L	12183833	1.16314	1.20936	0.357349	0.90995	0.989289	2.34707	1.5299	1.62209	1.71132	0.92441	1.18761	1.27445	0.68983	0.744065	0.735593	0.723163	1.02941	0.903364	1.00449	0.979088	1.43719	1.8933	0.894023	1.40817	0.357349	1.1536	0.971457	0.827469	1.74927	2.081	1.95968	1.92998	1.01989	1.60104	1.59825	1.40639	1.21295	2.02372	1.92945	1.72204	1.47648	1.26127	1.45581	1.39785	0.310796	1
FBgn0000606	eve	2R	5866746	0	0	0	0	0	0	0	0	0	0	0.183717	0.061239	0	0.0837109	0	0.0279036	0	0	0	0	0	0	0	0	0	0	0.171747	0.057249	0	0.111971	0	0.0373237	0	0	0.12362	0.0412067	0	0	0	0	0	0	0	0	1	1
FBgn0000611	exd	X	15886520	36.7343	38.1578	32.7479	35.88	43.0584	40.5237	39.6265	41.0695	40.3888	36.2332	39.1959	38.606	39.1561	39.5416	39.0433	39.247	35.7061	38.7328	36.7413	37.0601	29.0577	37.9221	33.8008	33.5935	32.7479	39.9739	35.8212	36.181	45.5184	41.8718	39.2611	42.2171	32.2884	36.8127	37.9302	35.6771	44.5987	38.9956	43.1823	42.2589	42.673	39.6499	46.1506	42.8245	0.961163	1
FBgn0000615	exu	2R	16554924	2.14939	1.24608	1.47273	1.62273	1.39564	2.31817	0.630514	1.44811	2.43644	1.72994	0.649974	1.60545	1.29226	0.780566	1.04823	1.04035	1.44853	1.72093	1.47052	1.54666	1.77693	0.792641	1.17431	1.24796	1.47273	1.47913	0.686343	1.21273	3.05183	1.67275	1.20303	1.97587	3.10405	2.98661	2.74601	2.94556	1.92267	1.70068	1.37184	1.66506	2.10948	2.42575	1.20252	1.91258	0.846672	1
FBgn0000617	e(y)1	X	17736208	4.86212	4.26545	6.72202	5.2832	5.42772	6.13199	6.29532	5.95168	6.82847	4.05741	6.28311	5.723	4.81694	4.66549	4.52366	4.6687	4.55623	5.66433	3.77905	4.66654	3.37934	4.94645	5.25541	4.52707	6.72202	4.42041	5.6562	5.59954	5.74535	5.1059	6.54454	5.7986	3.68943	5.41574	5.63709	4.91409	4.8266	4.47008	4.38559	4.56076	4.93757	5.10757	5.62912	5.22475	0.752048	1
FBgn0000618	e(y)2	X	11470151	7.37655	12.5504	8.03502	9.32066	10.2666	10.8255	9.26151	10.1179	9.14891	5.75597	9.75708	8.22065	8.24354	11.4656	9.39543	9.70152	7.75034	7.45182	7.64451	7.61556	4.97159	9.46021	6.95845	7.13008	8.03502	8.86799	8.6413	8.51477	13.8312	8.7636	8.84218	10.479	9.77003	9.91079	7.60204	9.09429	10.9739	9.22797	13.0152	11.0724	11.2365	7.27173	10.072	9.52674	0.579663	1
FBgn0000625	eyg	3L	12456132	1.39857	1.22055	0.961734	1.19362	1.4422	1.44759	1.54405	1.47795	1.02036	1.11955	1.65518	1.26503	0.801707	1.28675	0.799516	0.962658	1.30378	1.30916	0.966249	1.19306	0.483431	1.13232	1.65421	1.08999	0.961734	1.59731	1.02713	1.19539	0.983397	0.830782	1.62081	1.145	1.33782	1.16062	0.73931	1.07925	1.69504	0.8046	1.45533	1.31832	1.19213	1.13151	1.17543	1.16636	0.822477	1
FBgn0000629	E(z)	3L	10627675	6.12303	5.44419	4.16357	5.2436	6.36513	6.4914	5.40164	6.08606	5.27338	5.19072	6.25192	5.57201	4.5778	4.90752	5.01636	4.83389	5.52528	4.17099	4.60631	4.76753	6.08904	4.282	4.57693	4.98266	4.16357	4.43513	6.04923	4.88264	5.08676	6.22388	5.98039	5.76368	4.68062	5.20494	3.99648	4.62735	6.67997	5.10739	6.16195	5.9831	5.05188	3.61489	4.71624	4.461	0.823187	1
FBgn0000633	fas	2R	9510593	7.33282	8.64376	7.85878	7.94512	8.70255	8.71747	8.7478	8.72261	6.70592	10.0834	8.92361	8.57098	7.94391	8.17179	7.53272	7.88281	7.58172	7.47803	8.40426	7.82134	7.26951	6.53858	7.60236	7.13682	7.85878	7.5546	7.85388	7.75575	6.08189	6.95098	7.67002	6.90096	3.77275	5.83125	4.9501	4.85137	8.0436	6.14984	8.23187	7.4751	5.80143	5.85574	7.28541	6.31419	0.982281	1
FBgn0000635	Fas2	X	4028405	24.3197	23.2707	23.148	23.5795	25.7584	29.4672	25.7496	26.9917	21.9038	24.5451	23.4296	23.2928	21.6147	21.0902	23.2909	21.9986	18.6056	22.8516	24.3957	21.951	26.5076	19.604	21.3615	22.491	23.148	21.1033	20.147	21.4661	21.2926	19.5736	23.7497	21.5386	16.3366	18.1429	17.1295	17.203	19.891	19.1236	23.0878	20.7008	17.588	17.6674	21.4351	18.8968	0.219464	1
FBgn0000636	Fas3	2L	18320101	15.6107	14.7673	15.0441	15.1407	15.5082	16.6919	16.8463	16.3488	13.989	12.7049	15.42	14.038	15.8123	15.1908	15.6116	15.5382	14.4275	14.1842	14.7559	14.4559	15.4614	14.2451	13.1776	14.2947	15.0441	15.6443	14.8996	15.196	11.2188	11.7707	11.4365	11.4753	9.606	9.18079	9.41748	9.40142	11.6635	11.3906	12.4994	11.8512	11.8517	11.4297	13.8524	12.3779	0.293016	1
FBgn0000639	Fbp1	3L	14087686	0	0.0772939	0.0913569	0.0562169	0	0.100006	0	0.0333353	0.079546	0	0.0759039	0.0518166	0.288745	0.346059	0.37636	0.337055	0.0929184	0.106631	0.137019	0.112189	0.918983	0.538058	0.571665	0.676235	0.0913569	0.393424	0.496969	0.32725	0.127821	0.138838	0.13062	0.132426	0.0802494	0.0430851	0	0.0411115	0.0477068	0.188215	0.148036	0.127986	0.151043	0.0537409	0.248236	0.151007	1	1
FBgn0000640	Fbp2	2L	9426860	0	0	0	0	0.313203	0	0	0.104401	0	0.351195	0	0.117065	0.119125	0	0.107485	0.0755367	0.115025	0	0	0.0383417	0	0	0	0	0	0	0	0	0	0.171869	0	0.0572897	0	0	0	0	0	0	0.183256	0.0610853	0.186978	0.598965	0	0.261981	1	1
FBgn0000644	Fcp3C	X	3067409	0	0.546285	0	0.182095	0	0	0.345538	0.115179	0.281101	0	0.26823	0.18311	0.339933	0.12222	0.204478	0.22221	0.218822	0.376672	0.483991	0.359828	0	0	0.403842	0.134614	0	0.231599	0.501509	0.244369	0.150508	0.163481	0.9237	0.412563	0.567015	0.456764	0	0.34126	0.337174	0.332414	0.697247	0.455612	0.177853	0.189911	1.05217	0.473311	1	1
FBgn0000658	fj	2R	14120268	0.855392	0.889387	1.2264	0.990393	0.889218	1.24661	0.750076	0.961968	1.60178	1.17837	1.81957	1.53324	0.830149	0.696435	0.943227	0.82327	1.06877	0.8858	0.8208	0.925123	1.40925	0.618829	1.20538	1.07782	1.2264	1.00549	1.22473	1.15221	0.694272	0.576673	0.375961	0.548969	0.923138	0.826268	0.489744	0.746383	0.594686	0.496093	0.61488	0.568553	0.675629	0.824498	0.856502	0.785543	0.0508328	0.976912
FBgn0000659	fkh	3R	24406805	5.18943	6.13536	6.55732	5.9607	5.12567	7.26261	5.86249	6.08359	6.32167	6.89663	5.64043	6.28624	6.93161	6.19154	6.47418	6.53244	6.84989	6.42063	6.99703	6.75585	5.78105	5.51092	6.75511	6.01569	6.55732	5.14686	5.81228	5.83882	4.45771	4.74773	4.32985	4.51176	3.08118	3.42027	3.88163	3.46103	4.75366	4.20998	4.66516	4.54293	4.4631	4.94649	4.73525	4.71495	0.744485	1
FBgn0000662	fl(2)d	2R	9707129	17.4838	23.5103	16.6181	19.2041	20.8267	20.6855	20.4864	20.6662	19.8534	23.105	18.8815	20.6133	21.215	18.9699	20.2209	20.1353	19.1512	17.3569	18.049	18.1857	24.2979	23.6303	23.5564	23.8282	16.6181	22.6334	19.1654	19.4723	19.6945	19.8728	18.899	19.4888	15.768	16.944	16.4418	16.3846	21.6243	19.3664	21.5621	20.8509	20.9765	17.8354	22.7263	20.5127	0.724641	1
FBgn0000667	Actn	X	1918789	34.69	31.8823	24.2235	30.2653	32.6796	30.1624	26.6641	29.8354	21.8013	26.1903	23.2814	23.7577	33.4881	23.7104	30.9851	29.3945	24.3205	24.5351	22.0658	23.6405	47.2339	35.7894	34.0332	39.0188	24.2235	38.6993	40.027	34.3166	21.7104	23.3284	24.153	23.0639	15.3583	16.181	15.8031	15.7808	23.5052	22.5336	30.0097	25.3495	17.9847	17.7519	22.1067	19.2811	0.0193851	0.633489
FBgn0000709	fliI	X	21210823	5.51113	5.34448	5.79588	5.5505	4.9278	6.77229	6.41249	6.03753	4.64965	6.13201	5.573	5.45155	6.44563	5.59643	5.67144	5.9045	4.32574	4.83748	5.44284	4.86869	5.63105	6.36387	5.86527	5.9534	5.79588	5.37253	5.91804	5.69548	5.82915	5.1444	5.5898	5.52112	3.86022	5.34397	3.74999	4.31806	5.78119	5.53194	6.29396	5.86903	5.02264	5.32486	5.41216	5.25322	0.569517	1
FBgn0000711	flw	X	10279966	63.4357	73.9081	66.8858	68.0765	64.1089	64.4273	63.15	63.8954	53.9436	67.4135	61.2318	60.863	66.4326	57.6981	67.2178	63.7828	58.0227	59.7436	63.104	60.2901	73.1053	77.6983	75.8757	75.5598	66.8858	72.2611	67.9181	69.0217	57.0485	56.2562	60.2297	57.8448	36.2381	45.6982	44.2102	42.0488	71.0125	65.8299	73.5491	70.1305	55.4654	59.1558	70.0263	61.5492	0.982474	1
FBgn0000715	Fmrf	2R	5793796	3.30233	3.12701	4.34816	3.5925	2.60813	2.14191	3.02502	2.59169	3.40741	2.9245	1.98697	2.77296	1.22091	2.05765	1.92781	1.73546	2.50513	2.11384	2.44449	2.35449	6.55781	6.14328	4.07937	5.59349	4.34816	4.52298	3.88389	4.25168	4.25696	4.29359	4.769	4.43985	3.34113	2.25571	3.52482	3.04055	4.65477	3.69364	3.87374	4.07405	2.51518	3.70883	3.89708	3.3737	1	1
FBgn0000719	fog	X	22227998	12.3695	11.7229	10.1564	11.4163	14.4121	12.3751	11.7137	12.8336	10.3165	13.0008	12.0205	11.7793	11.6205	11.7437	12.4231	11.9291	11.8433	10.7363	11.1896	11.2564	12.5997	14.2559	11.6295	12.8284	10.1564	10.5445	9.80537	10.1688	11.3632	12.4807	11.9708	11.9382	9.61609	8.75146	8.42837	8.93197	11.565	10.6926	12.5615	11.6064	10.8083	10.2074	11.3353	10.7837	0.39995	1
FBgn0000721	for	2L	3622071	58.6708	52.6575	49.3774	53.5686	53.32	50.2567	52.2455	51.9407	52.3306	43.9035	43.9558	46.73	49.1387	56.7405	55.5111	53.7968	45.0006	45.9033	44.4851	45.1297	70.4637	66.4765	59.5592	65.4998	49.3774	57.7162	62.6847	56.5928	66.1184	66.1678	50.5957	60.9606	55.3742	50.3174	53.8224	53.1713	59.5349	60.4377	53.8955	57.956	65.8982	65.9028	53.3711	61.724	0.384608	1
FBgn0000723	Fps85D	3R	5193321	15.3223	11.1835	13.6666	13.3908	14.2961	13.2532	11.413	12.9874	9.65071	11.5288	12.1482	11.1092	11.9582	12.128	12.3833	12.1565	11.4825	11.6289	11.7098	11.6071	15.5289	12.3907	12.746	13.5552	13.6666	14.2629	13.807	13.9122	15.4574	17.7698	18.3734	17.2002	12.5246	13.8539	11.9427	12.7737	19.3819	17.686	20.6431	19.237	16.8024	15.0025	17.2938	16.3662	0.97911	1
FBgn0000808	gd	X	11879567	0	0	0.162199	0.0540663	0	0	0	0	0	0	0.134763	0.044921	0	0	0	0	0.0549699	0	0	0.0183233	0	0	0	0	0.162199	0.116359	0	0.0928527	0	0.0821814	0.077329	0.0531701	0	0	0	0	0.0847009	0	0	0.0282336	0	0	0	0	1	1
FBgn0000810	fs(1)K10	X	2136137	6.87496	7.65877	7.74468	7.42614	8.07498	7.48694	6.88974	7.48389	6.56827	7.80559	6.43466	6.93617	6.31906	5.40701	5.47864	5.7349	5.11304	5.67202	6.18228	5.65578	6.47224	6.74996	6.41666	6.54629	7.74468	7.64839	7.26539	7.55282	5.39244	5.60256	4.65242	5.21581	3.04727	3.9371	4.8921	3.95882	4.88466	4.71214	6.35389	5.3169	5.09771	5.32499	5.40876	5.27715	0.750814	1
FBgn0000826	png	X	1250521	0	0	0	0	0	0	0	0	0	0	0	0	0	0	0	0	0.280718	0	0	0.0935727	0	0	0	0	0	0	0	0	0	0	0.263328	0.087776	0.121234	0	0.154361	0.091865	0.144182	0	0	0.0480607	0	0	0	0	1	1
FBgn0000927	fs(1)Ya	X	2618319	0	0	0	0	0	0	0	0	0	0	0	0	0	0	0	0	0	0	0	0	0	0	0	0	0	0.0996114	0.10785	0.0691538	0	0	0	0	0	0	0	0	0	0.0714862	0	0.0238287	0.305979	0	0	0.101993	1	1
FBgn0000928	fs(1)Yb	X	2614501	0	0	0	0	0.0818995	0	0	0.0272998	0	0.183668	0	0.0612227	0.0623	0	0	0.0207667	0.0300779	0	0.0997894	0.0432891	0	0.208985	0	0.0696617	0	0.127337	0	0.0424457	0	0.044942	0	0.0149807	0	0.0418559	0	0.013952	0	0	0.0958391	0.0319464	0.0488929	0.0522078	0	0.0337002	1	1
FBgn0000964	tj	2L	19464267	6.56846	5.42343	4.62957	5.54049	6.24397	5.36022	5.7174	5.77386	5.58145	5.06678	5.69575	5.44799	9.59318	9.06662	9.07873	9.24618	7.51298	8.31009	7.30758	7.71022	8.41448	7.44234	8.01856	7.95846	4.62957	7.72813	8.50561	6.95444	5.64483	4.55344	4.79745	4.99857	5.43378	8.43954	7.66517	7.1795	4.55619	4.58355	6.63373	5.25782	4.85565	6.02281	6.86714	5.9152	0.89618	1
FBgn0000996	dup	2R	11264124	1.51844	0.930354	0.999657	1.14948	0.645742	0.875435	0.96295	0.828042	0.696335	0.620633	0.581396	0.632788	1.64906	1.5138	1.48792	1.55026	1.18575	1.90504	0.861729	1.31751	1.00511	1.53006	1.75068	1.42862	0.999657	1.50599	1.08703	1.19756	0.885482	0.911181	1.04874	0.948468	1.27291	1.69722	1.73251	1.56755	1.35726	1.18371	0.75565	1.09887	0.991285	0.764467	1.4118	1.05585	1	1
FBgn0001075	ft	2L	4198404	0.280224	0.187303	0.332072	0.266533	0.476681	0.302924	0.513385	0.430997	0.433711	0.32452	0.214591	0.324274	0.233104	0.286352	0.251223	0.256893	0.30636	0.208073	0.255831	0.256755	0.111294	0.173766	0.230774	0.171945	0.332072	0.224989	0.286585	0.281215	0.36123	0.270919	0.343099	0.325083	0.218712	0.113107	0.206278	0.179366	0.192677	0.246944	0.298829	0.24615	0.284572	0.314718	0.31065	0.303313	0.413267	1
FBgn0001077	ftz	3R	2690046	0	0	0	0	0	0	0	0	0	0	0	0	0	0	0	0	0.0599333	0	0	0.0199778	0	0	0	0	0	0	0	0	0.0824456	0	0.084331	0.0555922	0	0	0	0	0	0.0910453	0	0.0303484	0	0	0	0	1	1
FBgn0001078	ftz-f1	3L	18743707	25.4047	23.2426	23.0328	23.8934	25.635	27.9562	27.9642	27.1851	23.8167	28.8537	24.8087	25.8264	25.1852	25.8766	24.0817	25.0478	24.0212	25.7539	28.2555	26.0102	22.8487	20.7965	25.4936	23.0463	23.0328	25.6935	23.9881	24.2381	20.1832	23.162	20.6837	21.343	13.0518	15.5047	17.4015	15.3193	24.1293	17.9716	23.6078	21.9029	18.286	17.4957	19.9412	18.5743	0.738372	1
FBgn0001079	fu	X	18551787	1.44061	1.60486	2.4659	1.83712	2.62563	2.69935	2.23324	2.51941	2.56001	2.84599	2.75799	2.72133	2.19702	2.19022	1.74206	2.0431	1.73569	2.87709	1.70622	2.10633	2.09791	2.2333	1.06775	1.79965	2.4659	2.85761	2.87297	2.73216	1.98971	2.49739	3.43725	2.64145	2.87343	2.37063	1.64372	2.29593	2.72398	2.05077	2.71406	2.49627	2.71694	2.12007	2.52435	2.45379	0.362911	1
FBgn0001083	fw	X	11886948	3.95277	4.38854	4.30509	4.21547	2.07806	2.53758	2.76469	2.46011	1.39146	2.80152	2.56014	2.25104	2.32464	2.00595	2.01662	2.11574	1.7733	1.62281	2.49758	1.96456	4.79472	4.67889	4.80534	4.75965	4.30509	4.65636	4.06405	4.34183	1.81981	1.91322	2.21203	1.98169	2.19698	1.67275	1.73665	1.86879	4.50354	4.41526	5.0782	4.66567	4.85468	3.42862	4.96478	4.41603	0.715986	1
FBgn0001084	fy	2L	8401476	0.654106	1.36023	1.40674	1.14036	1.4836	0.438654	1.93584	1.28603	1.39986	1.03972	1.66971	1.36976	1.26963	0.912968	1.59105	1.25788	1.22594	0.9379	1.1298	1.09788	3.23295	2.6027	1.00554	2.2804	1.40674	2.16253	1.40483	1.65803	2.15488	1.32292	1.64163	1.70648	1.14712	0.56866	1.12352	0.946433	0.734604	1.65539	1.51909	1.30303	0.88569	1.65504	1.4191	1.31994	0.555094	1
FBgn0001085	fz	3L	14267447	3.63125	4.0712	4.23771	3.98005	3.53794	3.12385	4.18447	3.61542	2.55311	3.45847	3.53295	3.18151	4.61401	4.05114	3.31185	3.99233	3.68512	3.65194	3.76696	3.70134	2.94818	2.59226	3.16712	2.90252	4.23771	2.80871	2.40401	3.15014	2.69602	3.46847	3.80991	3.3248	1.25172	2.07429	2.09808	1.80803	3.28042	2.01445	3.29961	2.86483	3.01086	2.87795	2.70238	2.86373	0.783005	1
FBgn0001086	fzy	2L	16310929	0.333475	0.780137	0.307359	0.473657	0.425448	0.168228	0	0.197892	0.133811	0	0.255369	0.129727	0.53939	0.465438	0.389347	0.464725	0.781237	0.537917	0.691176	0.67011	1.23614	0.723751	0.192239	0.717377	0.307359	0.330741	0.238731	0.292277	0.286583	0.233463	0.366421	0.295489	0.202435	0.217432	0.171834	0.197234	0.240755	0.395595	0.663815	0.433388	0.507974	0.452012	0.417384	0.459123	0.4745	1
FBgn0001087	g	X	13621237	15.1833	16.4921	14.1773	15.2842	16.9252	16.5465	17.9665	17.1461	17.0419	15.0467	16.7809	16.2898	18.9941	16.3293	19.6293	18.3176	17.1851	18.112	17.1975	17.4982	20.4915	18.0902	20.0041	19.5286	14.1773	20.0667	17.6234	17.2891	14.4343	15.6608	15.2202	15.1051	13.064	14.1217	13.5629	13.5829	15.0986	15.988	18.4929	16.5265	13.3177	13.8412	15.3591	14.1727	0.677632	1
FBgn0001089	Gal	2L	6003574	2.58916	3.59823	1.7235	2.63696	3.91497	5.66	5.25026	4.94174	6.23361	5.21296	6.51562	5.9874	3.7226	3.66393	4.07262	3.81972	3.81913	5.63445	5.16766	4.87375	1.6032	1.25131	2.6601	1.8382	1.7235	2.38349	1.54463	1.88387	4.63559	4.90086	4.74159	4.75935	5.29736	6.00241	6.44839	5.91605	2.76928	2.73019	2.36806	2.62251	2.12326	2.72961	2.95259	2.60182	0.0991932	1
FBgn0001090	bnb	X	18688553	108.416	118.084	122.591	116.364	123.903	122.388	116.874	121.055	99.9923	118.877	106.714	108.528	99.0844	91.1205	99.494	96.5663	91.0885	103.893	96.2734	97.085	143.05	132.407	131.708	135.722	122.591	122.709	119.9	121.733	115.958	97.0488	99.9813	104.329	82.938	90.1357	78.8814	83.985	110.463	96.0439	104.175	103.561	100.206	94.0109	100.89	98.369	0.193584	1
FBgn0001091	Gapdh1	2R	3679403	262.493	268.353	223.791	251.546	251.538	283.962	275.183	270.228	258.053	225.059	234.186	239.099	224.93	242.978	250.332	239.413	212.366	201.936	197.387	203.896	302.129	278.59	290.237	290.319	223.791	253.904	282.818	253.504	255.379	234.749	185.753	225.294	301.389	231.762	226.724	253.292	212.524	243.88	215.574	223.993	250.982	271.265	287.297	269.848	0.224053	1
FBgn0001092	Gapdh2	X	15762178	361.213	340.209	314.602	338.675	374.152	370.392	362.23	368.925	355.429	311.649	325.462	330.847	278.567	316.861	299.979	298.469	289.409	299.581	274.65	287.88	319.626	308.62	292.875	307.04	314.602	319.887	329.25	321.246	417.887	353.972	299.621	357.16	431.613	354.614	343.632	376.62	338.262	351.573	309.466	333.1	416.036	372.031	367.058	385.042	0.283953	1
FBgn0001098	Gdh	3R	19761680	87.2348	92.0795	93.0569	90.7904	89.4881	91.3116	88.3731	89.7243	78.5826	93.6535	94.3294	88.8552	98.7715	84.8676	97.5767	93.7386	93.1934	102.218	92.3927	95.9347	122.682	125.496	127.672	125.283	93.0569	114.569	106.262	104.629	94.2989	86.1375	101.406	93.9475	89.0024	80.8083	78.4303	82.747	98.3594	88.6205	108.523	98.501	87.2024	82.2017	99.8218	89.742	0.757049	1
FBgn0001099	gdl	3L	15502545	5.16712	2.68272	3.17506	3.67497	3.48936	4.63334	4.13327	4.08532	2.99495	2.52847	5.7883e-05	1.84116	3.00661	4.20548	3.43525	3.54911	3.1357	2.90494	4.16466	3.40177	3.63171	5.08741	4.87455e-05	2.90639	3.17506	4.3902	3.7409	3.76872	2.45677	4.73096	2.43559	3.20777	2.46023	2.02571	0.887018	1.79099	4.76672	2.24284	2.64377	3.21778	3.18682	4.01717	3.77321	3.65907	0.13591	1
FBgn0001104	Galphai	3L	6965850	14.7857	16.5982	12.5795	14.6545	14.5105	13.4425	17.6314	15.1948	12.6483	14.7211	11.6959	13.0218	12.2995	12.3027	14.0381	12.8801	12.6882	13.0464	12.0674	12.6007	16.2618	12.5186	12.3639	13.7148	12.5795	13.6439	13.0276	13.0837	13.9633	15.0152	12.1402	13.7062	11.1127	11.0884	12.1399	11.447	14.1547	15.1114	12.3714	13.8792	12.2101	11.4523	12.8526	12.1717	0.302972	1
FBgn0001105	Gbeta13F	X	15754148	86.9117	84.5813	80.2047	83.8992	93.9632	101.013	87.0462	94.0075	95.7433	93.782	85.2123	91.5792	78.7694	80.7738	78.948	79.4971	71.9216	79.3958	78.2751	76.5308	86.6748	86.8516	88.3125	87.2796	80.2047	78.4434	78.9282	79.1921	82.088	84.9857	70.3448	79.1395	63.0624	70.471	72.888	68.8071	87.7349	76.9851	86.7708	83.8303	79.7273	71.472	88.1537	79.7843	0.809595	1
FBgn0001108	Gl	3L	13922489	10.1564	10.6949	12.0258	10.959	11.8541	11.3691	11.3355	11.5196	10.6495	11.5244	9.65099	10.6083	10.8159	9.36407	10.1702	10.1167	9.91105	9.27433	9.01436	9.39991	11.6791	10.6191	13.8466	12.0483	12.0258	10.2937	9.87134	10.7303	11.5314	10.8991	10.7199	11.0501	9.24061	9.02285	9.39721	9.22022	10.8828	9.74416	11.2892	10.6387	9.97518	9.8476	10.6149	10.1459	0.595451	1
FBgn0001112	Gld	3R	3077785	7.56822	5.81095	6.11699	6.49872	9.11089	8.57568	9.99292	9.2265	9.99825	9.66083	8.29218	9.31709	5.8759	5.56595	6.72915	6.057	6.07373	6.38574	5.59075	6.01674	6.68986	4.54862	3.4903	4.90959	6.11699	4.31124	4.50111	4.97645	8.65534	8.5862	9.21149	8.81768	5.98434	4.75748	7.31959	6.02047	4.59532	4.30945	4.51959	4.47479	5.37996	4.73465	4.89658	5.00373	0.721789	1
FBgn0001114	Glt	2L	8672043	427.328	420.214	362.677	403.406	348.673	399.937	361.234	369.948	442.175	381.693	376.604	400.157	351.76	394.251	376.581	374.197	381.377	400.088	370.94	384.135	466.97	469.224	433.997	456.73	362.677	427.454	462.583	417.571	389.741	348.335	220.201	319.426	534.86	459.705	500.329	498.298	351.991	384.436	290.465	342.297	385.784	397.467	349.612	377.621	0.0846715	1
FBgn0001120	gnu	3L	14795480	0.365449	0.28498	0	0.21681	0	0	0	0	0	0	0	0	0	0	0	0	0	0	0	0	0	0	0	0	0	0	0	0	0	0	0.160622	0.0535407	0	0	0	0	0	0.17341	0.181866	0.118425	0.37112	0	0	0.123707	1	1
FBgn0001122	Galphao	2R	6325466	72.7991	91.1912	81.5846	81.8583	93.7275	94.3751	83.7163	90.6063	78.9622	95.8136	87.8304	87.5354	87.7998	82.8377	76.7678	82.4684	72.6529	77.3196	80.607	76.8598	83.8156	80.4082	80.0485	81.4241	81.5846	83.9372	76.7957	80.7725	59.4146	66.5038	66.0557	63.9914	40.383	50.8858	48.1077	46.4588	68.2002	53.0338	73.0276	64.7539	58.8834	54.8352	71.2985	61.6724	0.86381	1
FBgn0001123	Galphas	2R	19830064	34.2191	42.7214	32.4171	36.4525	39.5862	44.4491	41.4226	41.8193	39.7515	34.7192	37.4735	37.3147	37.7665	40.5933	39.5149	39.2916	37.3712	35.7314	42.3362	38.4796	33.6793	29.6569	40.0599	34.4654	32.4171	31.8753	31.5731	31.9552	37.3245	39.1227	38.2932	38.2468	27.8667	29.3054	29.8686	29.0136	39.0035	30.3662	37.4219	35.5972	33.0803	32.0532	41.3257	35.4864	0.775511	1
FBgn0001124	Got1	2R	12025857	103.067	106.962	88.748	99.5923	109.196	111.43	107.202	109.276	94.2331	85.5571	92.9801	90.9234	76.3572	89.1775	77.3917	80.9755	80.7657	82.5373	78.9201	80.741	94.2201	86.5336	72.8613	84.5383	88.748	92.1383	94.0502	91.6455	151.971	117.236	81.9251	117.044	147.57	131.471	131.077	136.706	124.257	128.746	93.6537	115.552	161.15	121.49	105.496	129.379	0.0442077	0.935522
FBgn0001125	Got2	2L	1984512	154.361	165.332	138.501	152.731	175.849	181.066	172.955	176.623	140.043	97.3237	134.83	124.066	157.893	187.008	143.844	162.915	119.3	135.212	115.46	123.324	215.303	211.074	189.16	205.179	138.501	175.35	202.243	172.031	267.289	183.176	120.185	190.217	236.504	236.937	202.408	225.283	190.968	205.872	133.26	176.7	256.579	175.785	144.164	192.176	0.000373184	0.0390152
FBgn0001128	Gpdh	2L	5943682	570.07	524.321	511.748	535.38	459.272	487.491	477.952	474.905	605.826	575.112	517.136	566.025	382.173	428.387	430.726	413.762	480.595	483.473	474.22	479.429	444.336	444.503	417.429	435.423	511.748	461.013	470.551	481.104	586.807	530.837	390.997	502.88	664.096	622.293	582.057	622.815	543.966	528.515	466.085	512.855	558.734	611.792	530.64	567.055	0.0010946	0.0875795
FBgn0001133	grau	2R	16897274	7.50768	5.99394	5.60168	6.36777	7.44982	6.31234	6.7009	6.82102	4.59057	4.9439	5.74926	5.09458	4.27916	4.05424	6.3133	4.88223	4.69023	5.25425	4.44595	4.79681	5.63223	7.1772	6.59502	6.46815	5.60168	5.90964	5.63061	5.71398	6.37518	6.67437	6.6781	6.57588	5.42563	4.73975	5.06601	5.07713	6.88285	4.83481	6.40492	6.04086	6.26273	5.52432	5.2801	5.68905	0.136051	1
FBgn0001134	Grd	3L	17816433	3.14855	3.42445	2.67287	3.08196	4.01694	2.75872	2.61559	3.13042	2.06134	2.68671	3.99736	2.91514	3.00203	3.46935	2.92636	3.13258	3.54574	2.76217	2.77635	3.02809	1.38212	2.33775	2.38823	2.03603	2.67287	3.2871	2.84718	2.93572	3.13306	3.82848	3.56887	3.51014	2.17958	2.95332	2.77516	2.63602	3.07072	2.31967	3.25746	2.88262	3.61813	2.96496	2.86226	3.14845	0.961633	1
FBgn0001137	grk	2L	8431086	9.22791	8.72705	8.6862	8.88039	7.84867	9.7066	7.36007	8.30511	5.35728	6.36648	9.62257	7.11544	9.46371	7.05637	10.3729	8.96433	8.27938	5.91187	7.39276	7.19467	6.55017	6.17874	7.24377	6.65756	8.6862	7.14007	8.85507	8.22711	9.02708	8.15566	10.6142	9.26565	5.72098	6.31547	6.17137	6.06927	7.84342	7.08054	8.5983	7.84075	8.0751	8.09033	7.17565	7.78036	0.689903	1
FBgn0001138	grn	3R	3973090	1.56478	1.45742	2.00466	1.67562	3.09203	1.38143	1.7406	2.07135	2.43637	2.42894	3.00222	2.62251	1.8162	2.49406	2.36934	2.22653	2.05849	1.72407	2.7365	2.17302	2.53769	1.57183	3.29305	2.46752	2.00466	1.75647	2.31335	2.02483	1.89736	2.46677	1.72119	2.02844	0.910087	1.28385	1.06379	1.08591	1.84581	1.95883	2.48856	2.09773	1.14214	1.69897	2.1158	1.6523	0.227413	1
FBgn0001139	gro	3R	21867432	22.5161	26.5298	23.6648	24.2369	28.4868	22.2261	23.4346	24.7158	26.217	26.2533	24.4182	25.6295	21.9293	21.2646	22.6853	21.9597	21.5789	24.0833	20.0997	21.9206	26.1476	26.5781	22.8388	25.1882	23.6648	21.4575	20.7755	21.9659	19.0676	19.3987	16.6124	18.3596	15.9394	14.1602	16.5676	15.5557	20.1989	17.2715	18.6661	18.7122	16.1873	16.544	17.9879	16.9064	0.167856	1
FBgn0001142	Gs1	2L	132060	90.6163	86.3792	79.818	85.6045	85.3911	88.479	83.5954	85.8218	57.1545	45.8107	48.0814	50.3489	77.4783	79.8145	69.0614	75.4514	41.2083	38.5469	35.8102	38.5218	128.976	103.928	132.389	121.764	79.818	104.697	113.803	99.4393	81.2149	101.575	101.294	94.6946	30.6852	24.3618	30.7065	28.5845	62.7445	92.0792	97.9155	84.2464	90.7668	98.4055	109.716	99.6294	1.40137e-09	6.46362e-07
FBgn0001145	Gs2	X	11316888	426.813	425.787	423.654	425.418	436.547	425.108	436.87	432.842	460.576	494.251	435.828	463.552	476.324	487.76	479.17	481.085	492.526	462.011	474.093	476.21	518.738	542.068	519.062	526.623	423.654	476.049	448.21	449.304	409.385	369.209	389.023	389.206	451.697	445.111	429.93	442.246	381.905	404.534	419.914	402.118	345.108	332.03	375.215	350.784	0.0824606	1
FBgn0001147	gsb-n	2R	20927905	0	0.353227	0.139164	0.16413	0	0.152339	0	0.0507797	0.121173	0.143999	0	0.0883907	0.195378	0.0526847	0.0881435	0.112069	0.0943266	0.16237	0	0.0855655	0	0	0.174082	0.0580273	0.139164	0	0.108092	0.0824187	0.129758	0.0704708	0.0663625	0.0888638	0	0.196895	0.0778022	0.0915657	0.145344	0	0.225419	0.123588	0.0766661	0.163728	0	0.0801314	1	1
FBgn0001148	gsb	2R	20949502	0	0	0	0	0	0	0	0	0	0.393751	0	0.13125	0	0	0.0602547	0.0200849	0	0	0	0	0	0	0	0	0	0.136493	0	0.0454977	0	0	0	0	0	0.0897315	0.106371	0.0653675	0	0	0	0	0	0	0	0	0.512388	1
FBgn0001149	GstD1	3R	8193269	223.972	184.795	190.537	199.768	198.032	219.455	195.408	204.298	210.194	223.054	179.842	204.363	174.079	168.606	175.391	172.692	160.013	159.364	170.687	163.355	181.773	166.022	175.37	174.388	190.537	163.365	181.685	178.529	197.755	136.379	177.558	170.564	152.936	152.986	128.446	144.789	142.559	149.417	160.343	150.773	175.343	135.205	164.534	158.361	0.592967	1
FBgn0001150	gt	X	2321140	0.189287	0.295215	0.348926	0.277809	1.12697	2.48273	0.933649	1.51445	1.06336	1.35393	1.30457	1.24062	0.949123	0.924672	1.16026	1.01135	0.709514	1.11955	1.5693	1.13279	0	0.102704	0.218238	0.106981	0.348926	0.125157	0	0.158028	0.569347	1.32518	0.831952	0.908826	0.536231	0.575954	0.926597	0.679594	0.0911051	0	0.188398	0.0931677	0	0.102628	0.0947663	0.0657981	0.797297	1
FBgn0001168	h	3L	8668859	35.523	26.9199	30.6674	31.0368	27.4883	27.7299	25.5673	26.9285	32.4734	27.1569	30.539	30.0564	31.6212	27.611	28.9143	29.3822	35.624	35.5145	34.6317	35.2567	34.4696	39.5517	38.9395	37.6536	30.6674	34.1956	35.3341	33.399	27.2021	21.7943	25.0089	24.6684	22.8727	20.7048	29.6783	24.4186	28.7688	20.9318	31.5337	27.0781	25.4346	23.4101	24.066	24.3036	0.10267	1
FBgn0001169	H	3R	16447665	6.31948	4.48461	5.61632	5.47347	7.32281	4.64896	4.77613	5.58263	5.42118	5.25396	6.04707	5.57407	5.94289	5.3949	6.29387	5.87722	5.86998	6.00184	6.34381	6.07188	6.15693	5.77677	7.58974	6.50781	5.61632	5.02852	6.81411	5.81965	5.52873	4.46169	4.37538	4.7886	4.98834	5.07728	4.80799	4.95787	5.68285	5.20598	6.14871	5.67918	5.39451	5.28733	5.14656	5.27613	0.64877	1
FBgn0001170	H2.0	2L	6013057	0	0.158456	0	0.0528187	0	0	0.400907	0.133636	0.326145	0.387584	0	0.23791	0.197202	0	0.296555	0.164586	0.126943	0.145677	0.350966	0.207862	0	0.220504	0.234277	0.151594	0	0.403066	0.436403	0.279823	0.0873129	0.0948384	0.0893095	0.0904869	0.164469	0.0883261	0.104705	0.119167	0.391203	0.289261	0.202244	0.294236	0.206352	0.110171	0.305193	0.207239	0.696307	1
FBgn0001174	halo	2L	1517532	0	0	0	0	0.439347	0.554237	0	0.331195	0	0	0.420664	0.140221	0	0	0.160336	0.0534453	0	0	0	0	0	0	0	0	0	0	0	0	0	0	0.241439	0.0804797	0	0	0	0	0	0	0	0	0	0	0	0	1	1
FBgn0001179	hay	3L	10624227	3.35828	4.39965	4.20963	3.98919	3.58873	4.87922	4.10806	4.192	4.09658	3.07438	4.83488	4.00195	3.65032	4.03101	3.68564	3.78899	3.36267	4.04484	3.56549	3.65767	6.47337	4.66472	4.64636	5.26148	4.20963	4.79634	3.65434	4.2201	4.61774	4.25444	4.48713	4.4531	3.96858	3.97392	3.04566	3.66272	3.36207	4.26613	5.21436	4.28085	5.11563	4.80698	4.43872	4.78711	0.906483	1
FBgn0001180	hb	3R	4517038	0.402762	1.25629	0.207117	0.622056	0.68512	0.68019	0.993301	0.786204	0.565643	1.63248	1.00242	1.06685	0.716604	0.421605	0.969868	0.702692	0.754838	0.541399	0.660865	0.652367	1.66602	1.34123	1.27699	1.42808	0.207117	1.26495	0.576944	0.683004	0.475921	0.943958	1.0395	0.819793	0.549009	0.612749	0.259423	0.473727	0.969276	0.862878	1.18223	1.00479	0.409008	0.491333	0.504105	0.468149	0.109756	1
FBgn0001185	her	2L	16677210	6.26785	7.84607	7.44928	7.18773	8.27713	9.15301	5.3696	7.59991	6.0891	7.23616	8.46283	7.2627	7.68365	5.69783	7.79947	7.06032	6.64636	6.85856	7.35021	6.95171	7.03134	7.15965	8.36753	7.51951	7.44928	7.52522	5.54982	6.84144	7.6545	9.0071	7.24958	7.97039	5.54046	6.45277	6.03449	6.00924	6.58924	6.26142	7.798	6.88289	5.69511	6.26009	7.84498	6.60006	0.96295	1
FBgn0001186	Hex-A	X	9479918	80.6313	79.9032	76.7732	79.1026	89.8566	93.4155	86.3194	89.8638	76.8508	82.9671	75.4409	78.4196	82.0892	75.1061	79.7135	78.9696	70.8326	79.5914	78.4526	76.2922	95.5363	86.6034	92.1376	91.4258	76.7732	83.9272	82.6023	81.1009	66.06	65.1951	62.0934	64.4495	53.0173	52.5127	56.1836	53.9045	67.058	62.0018	65.2207	64.7602	55.7137	56.1234	60.0308	57.2893	0.335818	1
FBgn0001187	Hex-C	2R	11106342	59.286	51.4056	52.4731	54.3882	48.6045	57.0088	54.6846	53.4326	52.7316	46.1313	47.5309	48.7979	57.0518	59.969	47.4164	54.8124	51.3443	50.8658	51.3845	51.1982	66.2466	68.7481	67.8601	67.6183	52.4731	55.899	57.9176	55.4299	77.3439	67.7276	50.1391	65.0702	71.1129	68.5659	57.2383	65.639	71.3884	66.9276	51.4451	63.2537	80.5283	61.0387	48.7547	63.4406	0.550571	1
FBgn0001189	hfw	X	1563626	10.365	13.9803	15.4223	13.2559	10.6375	14.4783	14.1485	13.0881	10.5509	13.0451	12.0018	11.8659	10.9219	9.64105	9.53703	10.0333	9.00147	11.8675	10.5065	10.4585	16.9436	14.2668	12.4108	14.5404	15.4223	12.3808	10.7428	12.8486	11.5837	11.4655	12.6658	11.905	11.2324	11.545	9.66109	10.8128	12.3438	12.855	11.8394	12.3461	13.0884	11.0283	10.1808	11.4325	0.143884	1
FBgn0001197	His2Av	3R	22692653	37.4377	38.4438	36.214	37.3652	36.2558	35.1545	33.6409	35.0171	39.8613	34.644	29.2368	34.5807	30.6971	30.5238	40.0317	33.7509	31.493	29.4972	28.554	29.8481	40.5335	35.7993	41.8815	39.4048	36.214	33.0869	31.843	33.7146	33.129	31.3134	30.7912	31.7445	27.7518	31.4189	25.403	28.1912	37.2868	26.559	35.9705	33.2721	43.1003	32.5574	42.6823	39.4467	0.848081	1
FBgn0001202	hk	2L	19030838	15.9931	19.9545	19.1628	18.3701	20.0331	19.07	18.6456	19.2496	20.0692	19.5513	16.7008	18.7738	16.8851	17.7054	18.5454	17.712	17.2577	16.1042	15.8709	16.4109	14.2821	15.7775	17.0982	15.7193	19.1628	20.2842	17.5903	19.0124	21.616	18.4575	20.96	20.3445	14.2393	16.1789	16.5569	15.6584	20.6436	20.0762	21.3446	20.6881	19.1943	16.5541	20.9636	18.904	0.885201	1
FBgn0001206	Hmr	X	10484952	1.95521	1.29881	1.53511	1.59638	1.97093	1.31513	1.28586	1.52397	1.45288	1.31219	1.38636	1.38381	1.40556	0.93491	1.09913	1.14653	1.04051	1.03831	1.42587	1.16823	0.67108	1.41449	2.08727	1.39095	1.53511	1.19703	1.29603	1.34272	0.777906	0.878752	1.49591	1.05086	0.908497	1.13318	0.820915	0.954197	1.63813	1.27139	1.7298	1.54644	0.808927	1.33492	1.5952	1.24635	0.645824	1
FBgn0001208	Hn	3L	7753577	310.616	310.543	274.596	298.585	282.543	300.156	294.735	292.478	289.432	267.711	262.792	273.312	214.412	253.909	251.203	239.841	258.657	256.939	249.438	255.011	244.533	233.955	242.099	240.196	274.596	246.822	253.312	258.243	432.895	420.593	308.41	387.299	421.34	397.865	403.184	407.463	371.33	419.26	332.385	374.325	395.82	351.713	290.931	346.155	0.768282	1
FBgn0001215	Hrb98DE	3R	24425529	81.8798	88.9298	79.0657	83.2918	85.6511	94.204	82.5761	87.4771	85.5501	84.6074	82.9891	84.3822	82.6023	73.4252	81.8253	79.2843	72.0725	76.5698	77.1056	75.2493	92.6905	91.1377	100.054	94.6274	79.0657	97.9405	86.3919	87.7994	87.4482	83.2669	71.991	80.902	70.3204	75.2832	81.7924	75.7987	99.647	79.0813	91.717	90.1484	84.9854	77.8821	93.1643	85.3439	0.968741	1
FBgn0001216	Hsc70-1	3L	13967277	6.96161	5.0683	5.86818	5.96603	3.96377	4.14864	4.89851	4.33697	4.58908	4.97592	3.68564	4.41688	4.22503	3.16234	4.68469	4.02402	3.48147	1.94941	2.7492	2.72669	5.45385	5.23778	5.96421	5.55195	5.86818	6.05787	6.36211	6.09605	3.55775	4.2151	4.37547	4.04944	2.38981	2.2486	3.3079	2.64877	3.90076	3.35811	3.48896	3.58261	4.1757	5.14984	6.32313	5.21622	0.860721	1
FBgn0001217	Hsc70-2	3R	8870481	0	0	0	0	0	0	0	0	0	0.147838	0.118707	0.0888483	0	0	0.0452464	0.0150821	0	0	0.0535482	0.0178494	0	0.168216	0.178722	0.115646	0	0	0	0	0	0.0723492	0.0681314	0.0468269	0.0627339	0.134762	0.079876	0.0924573	0.0746091	0	0	0.0248697	0.0787095	0.0840459	0	0.0542518	0.506118	1
FBgn0001218	Hsc70-3	X	11695729	275.816	268.481	232.161	258.819	243.993	245.183	237.336	242.171	248.69	212.635	216.681	226.002	295.05	308.488	316.011	306.516	203.686	211.652	208.293	207.877	331.615	353.063	316.177	333.618	232.161	305.822	322.109	286.697	167.913	157.411	120.23	148.518	239.093	252.145	233.553	241.597	199.783	179.58	176.818	185.394	265.249	260.57	283.666	269.828	0.537435	1
FBgn0001219	Hsc70-4	3R	11068370	599.58	557.869	579.464	578.971	576.566	561.576	555.664	564.602	560.332	515.285	541.881	539.166	552.481	530.509	550.426	544.472	490.267	521.593	491.161	501.007	631.072	689.296	626.974	649.114	579.464	651.834	623.004	618.101	610.393	564.513	553.883	576.263	578.719	527.663	482.768	529.717	594.812	531.749	534.341	553.634	637.723	550.971	556.684	581.793	0.923837	1
FBgn0001220	Hsc70-5	2R	10140103	61.5284	64.0937	60.3274	61.9832	56.0631	58.1185	55.8004	56.6607	51.4164	50.2028	54.7198	52.113	63.0363	58.5266	55.3269	58.9633	60.7585	58.1386	58.38	59.0924	74.6704	75.9133	72.8023	74.462	60.3274	71.9771	68.3439	66.8828	68.8487	63.63	56.927	63.1352	72.1788	69.2462	73.3429	71.5893	70.0625	70.3333	69.7415	70.0458	76.0232	74.6056	73.7449	74.7912	0.585332	1
FBgn0001222	Hsf	2R	14017808	15.1971	13.8367	10.7006	13.2448	13.8755	14.4333	14.4519	14.2536	13.4078	13.1907	14.1243	13.5743	11.9649	11.0982	11.9655	11.6762	12.9009	12.2293	13.1013	12.7438	17.5528	10.5791	13.8234	13.9851	10.7006	12.588	13.5147	12.2678	15.3336	13.3483	15.0128	14.5649	13.4718	13.0485	14.0684	13.5296	14.7274	14.5735	16.5698	15.2902	14.1765	13.4082	15.9224	14.5024	0.975448	1
FBgn0001223	Hsp22	3L	9366031	15.3322	11.4127	16.0585	14.2678	7.70582	4.57048	9.96883	7.41504	5.31333	3.65561	7.35882	5.44259	6.69443	7.90325	7.16291	7.25353	11.2111	8.86852	12.5188	10.8661	5.16675	12.8567	7.2316	8.41835	16.0585	11.9809	14.7181	14.2525	15.7217	9.10762	10.4145	11.7479	30.7427	28.9304	36.9885	32.2205	24.9897	18.1884	29.3065	24.1615	34.5021	24.3719	32.9722	30.6154	0.414484	1
FBgn0001224	Hsp23	3L	9374986	10.3295	12.831	9.14639	10.769	10.0698	10.7797	12.1499	10.9998	11.024	10.2304	12.8569	11.3704	5.01248	8.41428	6.35017	6.59231	8.10484	7.28671	8.64834	8.0133	5.89085	3.44905	6.599	5.31297	9.14639	8.66891	8.24827	8.68786	9.21866	8.90455	7.39195	8.50505	11.7375	10.9379	9.63432	10.7699	9.36889	8.2884	10.4686	9.3753	9.48127	5.37902	8.40589	7.75539	0.617283	1
FBgn0001225	Hsp26	3L	9369518	4.22517	4.94223	6.16595	5.11112	4.1926	3.19721	2.43139	3.27373	3.10825	1.34319	4.31408	2.92184	2.84756	5.65145	3.69982	4.06628	3.0795	2.77668	2.55421	2.80346	3.91552	6.87753	3.2476	4.68022	6.16595	4.88897	4.7892	5.28137	2.87458	2.13634	4.17834	3.06309	1.85242	2.90794	2.54002	2.43346	4.57561	3.34149	5.43187	4.44966	3.57562	3.62713	3.8781	3.69362	0.819263	1
FBgn0001226	Hsp27	3L	9377165	2.07362	3.44966	2.16606	2.56311	3.4098	2.78955	2.59111	2.93015	2.21885	2.505	4.44625	3.0567	2.01243	2.12242	1.81579	1.98355	2.24544	2.57681	2.1967	2.33965	1.79354	3.45035	1.59385	2.27925	2.16606	1.91952	2.57311	2.21956	0.950422	0.774255	1.76203	1.16224	1.23082	1.14172	1.99454	1.45569	1.2642	1.11516	2.27027	1.54988	2.52696	1.79886	1.38421	1.90334	0.854591	1
FBgn0001227	Hsp67Ba	3L	9370902	4.4767	4.70521	3.94671	4.37621	6.29081	5.30224	4.99225	5.52843	4.37369	5.94012	4.47154	4.92845	3.77791	3.32786	3.74963	3.61847	3.16149	4.46529	3.63077	3.75252	3.96824	5.49162	3.14172	4.20053	3.94671	4.11827	4.04086	4.03528	5.0181	4.1788	3.593	4.2633	3.54466	3.55343	3.91148	3.66986	4.21565	4.34086	4.26194	4.27282	4.24968	3.4825	3.80039	3.84419	0.647871	1
FBgn0001228	Hsp67Bb	3L	9365822	1.94907e-06	1.31869e-06	2.05293e-06	1.77356e-06	1.9995e-06	1.1635	1.98103e-06	0.387835	1.49556	0.549901	0.55199	0.865817	1.1702	0.603567	1.72841	1.16739	1.13017	0.206686	0.398361	0.578406	1.06867	1.25141	0.664782	0.994954	2.05293e-06	1.14374	2.0639	1.06921	1.16755e-06	0.65234	0.253425	0.301922	0.233348	0.751904	1.18844	0.724564	8.25734e-07	0.813512	0.422829	0.412114	0.292772	0.505191	0.866018	0.55466	0.49889	1
FBgn0001229	Hsp67Bc	3L	9364611	2.39227	2.39851	2.51991	2.4369	2.03471	1.72404	3.03422	2.26432	2.74266	1.95559	1.30854	2.00226	1.87945	1.66947	3.09234	2.21375	2.66876	1.83756	2.47917	2.3285	3.80047	2.22515	2.36413	2.79658	2.51991	1.80774	2.20191	2.17652	2.49642	2.39258	3.75516	2.88139	1.9363	2.37684	0.704398	1.67251	2.79629	2.10815	2.89124	2.59856	1.90881	2.40881	3.07976	2.46579	0.886521	1
FBgn0001230	Hsp68	3R	19880802	6.20722	6.61133	7.1165	6.64502	7.46851	5.95722	7.31817	6.91463	8.14045	6.06426	10.0864	8.09704	7.49333	12.3086	8.66132	9.48775	7.28271	8.52026	7.47867	7.76055	7.85681	4.43582	7.8548	6.71581	7.1165	8.30857	8.45384	7.95964	7.67632	7.3487	6.4545	7.15984	7.71999	8.35768	9.51743	8.5317	5.24648	4.66954	8.06161	5.99254	6.22667	5.33548	4.16878	5.24364	0.163697	1
FBgn0001233	Hsp83	3L	3193027	177.296	155.708	193.32	175.441	167.187	144.133	147.672	152.997	183.792	156.282	153.677	164.584	220.249	172.404	138.485	177.046	172.355	150.998	174.287	165.88	184.35	180.124	182.194	182.223	193.32	175.843	150.778	173.314	109.04	130.334	189.184	142.853	103.001	142.082	123.212	122.765	126.683	116.578	190.509	144.59	148.798	127.136	217.427	164.454	0.0966469	1
FBgn0001234	Hsromega	3R	17121849	113.222	102.171	115.96	110.451	145.391	131.62	141.621	139.544	152.057	134.506	133.489	140.017	157.012	191.309	192.741	180.354	207.415	199.888	209.19	205.498	86.1072	94.0753	84.1447	88.1091	115.96	99.9486	95.1923	103.7	140.889	135.208	148.94	141.679	97.1757	121.337	88.7537	102.422	134.292	106.697	123.775	121.588	120.585	108.255	111.509	113.45	0.341732	1
FBgn0001235	hth	3R	6335569	152.015	145.906	130.929	142.95	144.237	151.854	135.396	143.829	153.838	146.759	140.461	147.019	151.946	152.914	143.451	149.437	141.154	137.32	139.855	139.443	136.316	133.69	145.203	138.403	130.929	145.026	132.327	136.094	119.687	126.965	94.0805	113.577	69.3052	95.2463	115.013	93.1882	120.572	110.395	123.925	118.297	101.775	118.813	118.966	113.185	0.327505	1
FBgn0001247	Ide	3L	20364772	17.2627	18.1273	17.4476	17.6125	19.5211	22.563	15.5781	19.2207	18.7341	18.1474	18.0266	18.3027	17.5783	17.9336	18.4945	18.0021	16.7894	18.0014	15.9246	16.9051	17.8155	20.3295	16.8497	18.3316	17.4476	18.4183	17.484	17.7833	18.502	21.058	19.6149	19.725	14.8457	15.2633	17.3355	15.8148	18.9305	17.8721	21.1841	19.3289	18.4271	17.4428	17.7271	17.8657	0.917928	1
FBgn0001248	Idh	3L	8349503	121.138	112.669	108.663	114.157	146.413	141.948	137.433	141.931	167.626	152.017	162.147	160.597	125.516	122.253	132.171	126.647	187.615	187.674	181.513	185.601	128.483	103.248	107.782	113.171	108.663	110.887	109.372	109.641	184.382	174.472	164.61	174.488	242.204	270.953	238.796	250.651	141.069	148.714	142.256	144.013	138.53	144.908	131.46	138.299	0.0216102	0.675082
FBgn0001250	if	X	16646222	12.4435	13.8714	13.7932	13.3694	16.9484	17.3693	15.2409	16.5195	15.8526	14.9611	15.9884	15.6007	12.9833	12.5263	12.9687	12.8261	12.5365	11.9912	11.4277	11.9851	13.2012	12.3318	11.8061	12.4464	13.7932	12.2251	12.3473	12.7885	14.4422	15.2237	13.0728	14.2462	10.607	10.9225	13.5803	11.7033	12.0209	13.6895	13.4938	13.0681	11.9846	12.0586	12.2957	12.113	0.589464	1
FBgn0001253	ImpE1	3L	8365509	0.614	0.943518	0.46297	0.673496	0.712083	0.675751	0.495521	0.627785	0.447911	0.638757	0.213679	0.433449	0.686148	0.592432	0.439884	0.572821	0.348693	0.586375	0.70737	0.547479	0.413713	0.787376	0.900911	0.700667	0.46297	0.664292	0.323369	0.483544	0.407715	0.764204	0.490638	0.554186	0.180694	0.361116	0.172544	0.238118	0.628869	0.262433	0.499975	0.463759	0.36842	0.211816	0.403819	0.328018	0.259742	1
FBgn0001254	ImpE2	3L	3510974	0	0	0	0	0	0	0.19482	0.06494	0.475469	0.188346	0	0.221272	0	0	0	0	0	0.0707914	0	0.0235971	0	0.214308	0	0.071436	0	0	0.14138	0.0471267	0	0	0.0867997	0.0289332	0	0	0	0	0.0950523	0.0937105	0.19656	0.128441	0.100276	0	0	0.0334253	0.387751	1
FBgn0001255	ImpE3	3R	3853932	1.26144	0.235281	0.718287	0.738336	1.28307	0.786286	1.03982	1.03639	0.121064	0.143871	0	0.0883117	0.831404	0.736926	1.05678	0.875037	0.848202	0.842462	0.885892	0.858852	0	1.0951	1.39142	0.82884	0.718287	0.498725	0.573984	0.596999	0.453746	0.422448	0.599851	0.492015	0.102101	0.327865	0.310931	0.246966	0.507379	0.750247	0.525508	0.594378	0.535208	0.654352	0.604199	0.59792	0.000257123	0.0280014
FBgn0001256	ImpL1	3L	13375865	0	0.227069	0	0.0756897	0.247664	0	0.861864	0.369843	0	0	0	0	0.18841	0.406489	0.17	0.254966	0.181925	0.417589	0.301801	0.300438	0	0.297591	0	0.099197	0	0.192533	0.208457	0.133663	0.625895	0.135905	0.51122	0.42434	0.235704	0	0	0.078568	0.14015	0	0	0.0467167	0.147852	0	0.145782	0.097878	0.135275	1
FBgn0001257	ImpL2	3L	4224699	56.6124	45.9399	50.8776	51.1433	39.2741	40.4911	44.3679	41.3777	49.6419	43.1338	39.849	44.2082	56.6877	59.3545	58.7517	58.2646	30.2623	28.4543	22.6255	27.114	72.4938	64.9522	70.9039	69.45	50.8776	61.32	71.8435	61.347	38.4356	36.686	35.3029	36.8082	34.6428	20.5003	33.8561	29.6664	46.2719	36.9646	39.7509	40.9958	48.0851	57.8887	54.1498	53.3745	0.294633	1
FBgn0001258	ImpL3	3L	6252265	8.75713	8.3208	7.42255	8.16683	5.56903	9.05268	8.13344	7.58505	5.05984	4.62537	6.65015	5.44512	7.92306	8.97733	7.19572	8.03204	10.8317	10.5267	9.96836	10.4423	4.9439	6.57868	11.1617	7.56143	7.42255	8.69675	7.2912	7.8035	9.30635	5.77215	5.75206	6.94352	7.47419	8.4562	9.24658	8.39232	6.19931	9.36522	7.04132	7.53528	6.64896	5.53722	7.41964	6.53527	0.230425	1
FBgn0001259	in	3L	20360298	0.33048	1.03084	0.812262	0.724527	0.56217	1.11145	0.65203	0.775217	1.4145	0.840482	0.421793	0.892258	0.677091	0.384381	0.61093	0.557467	0.309688	0.55283	0.342484	0.401667	0.408346	0.119542	0.635042	0.387643	0.812262	0.655542	0.473174	0.646993	0.520684	0.514147	0.871512	0.635448	0.847051	0.430958	0.737927	0.671979	0.530207	0.418178	0.603032	0.517139	0.447477	0.716723	0.38606	0.516753	0.631792	1
FBgn0001263	inaD	2R	18743211	91.7129	105.673	114.062	103.816	128.133	100.244	107.148	111.842	88.7	115.297	119.192	107.73	100.678	73.5469	107.079	93.768	104.555	106.74	95.5014	102.265	110.053	110.05	100.995	107.033	114.062	113.021	100.484	109.189	125.01	110.305	111.143	115.486	94.7924	99.5364	80.8842	91.7377	113.68	106.217	109.494	109.797	95.2257	91.9599	107.432	98.2059	0.985961	1
FBgn0001269	inv	2R	7361970	0.924398	1.16029	0.703015	0.929234	1.16778	0.900731	1.32103	1.12985	0.612127	0.709517	1.02548	0.782375	1.03639	0.745241	1.02418	0.93527	0.571831	0.693363	1.07937	0.781521	0.848183	0.484389	0.527623	0.620065	0.703015	0.787049	0.65526	0.715108	0.917732	0.972238	0.784758	0.891576	0.555648	0.795752	0.996707	0.782702	0.716142	0.917843	0.531412	0.721799	0.391909	0.564707	0.9929	0.649839	0.300398	1
FBgn0001276	ix	2R	7246942	3.24782	3.97992	2.99347	3.40707	5.91941	7.48997	7.32331	6.9109	7.44705	7.52243	6.75077	7.24008	5.2533	4.20927	3.79199	4.41819	4.49277	5.98738	3.20552	4.56189	10.3193	7.04886	6.9542	8.10745	2.99347	7.36275	3.6537	4.66997	6.57909	5.84685	6.52562	6.31719	3.94318	6.0504	3.82526	4.60628	3.57302	4.40323	5.77243	4.58289	6.59644	5.53431	5.57492	5.90189	0.653723	1
FBgn0001280	janA	3R	25864339	12.1553	14.8787	23.5783	16.8708	15.9359	15.3298	9.99248	13.7527	14.7481	16.9766	14.2308	15.3185	14.3315	15.4514	15.5919	15.1249	12.6872	14.0073	14.0044	13.5663	19.947	19.2361	9.77245	16.3185	23.5783	16.2509	12.3276	17.3856	20.6263	15.4458	15.5333	17.2018	19.003	16.9071	14.4309	16.7803	17.7089	14.4408	18.9382	17.0293	19.3456	15.5811	20.7128	18.5465	0.406172	1
FBgn0001281	janB	3R	25863702	0	0	0	0	1.41659e-137	0	0	4.72197e-138	0	0	0	0	0	0	0	0	0	0	0	0	0	0	0	0	0	0	0	0	4.70417e-90	1.11352e-68	1.39652e-190	3.71173e-69	0	2.50035e-68	0	8.3345e-69	3.02077e-58	5.26522e-144	0	1.00692e-58	8.53004e-212	0	0	2.84335e-212	0.388865	1
FBgn0001285	Jon44E	2R	4578955	0	0	0	0	0	0	0	0	0.900333	0	0.28637	0.395568	0	0	0	0	0	0	0	0	0	0	0	0	0	0.494523	0	0.164841	0	0.349073	0.164361	0.171145	0.454021	0.162551	0	0.205524	0	0.177447	0	0.059149	0.18988	0	0	0.0632933	0.135547	1
FBgn0001291	Jra	2R	5983985	18.0225	13.707	14.3552	15.3616	14.1933	17.9591	12.2916	14.8147	15.5349	16.976	14.3125	15.6078	12.3082	13.897	15.7816	13.9956	12.9966	13.1599	12.9126	13.023	17.3202	15.6942	14.6222	15.8789	14.3552	12.2107	14.8135	13.7931	13.8629	13.6039	13.7888	13.7519	13.0566	12.7665	9.17204	11.665	12.8509	13.0918	15.7232	13.8886	13.8961	12.0636	13.9243	13.2947	0.378625	1
FBgn0001296	kar	3R	8507908	13.1479	11.0619	13.8609	12.6902	15.8405	14.7022	15.521	15.3546	14.6119	16.5288	12.5668	14.5692	15.6229	18.7994	16.8726	17.0983	12.041	13.379	14.082	13.1673	16.7203	14.482	14.7807	15.3277	13.8609	15.6429	16.7191	15.4076	13.6736	13.4428	13.4977	13.538	11.5268	11.1507	9.16538	10.6143	14.043	14.7082	11.1171	13.2894	11.0347	11.8849	9.93287	10.9508	0.820675	1
FBgn0001297	kay	3R	25592497	39.3217	37.3381	42.9673	39.8757	47.2754	41.1147	41.689	43.3597	33.6329	44.1082	42.5434	40.0948	38.1359	35.1901	37.4657	36.9306	38.0032	42.3279	39.1236	39.8182	42.3186	37.9926	37.7992	39.3701	42.9673	42.3791	34.2524	39.8663	32.4198	35.3984	37.3681	35.0621	22.7657	28.5356	31.9707	27.7573	36.5822	33.1132	40.6878	36.7944	28.8363	30.7333	31.8898	30.4865	0.707069	1
FBgn0001301	kel	2L	18129330	10.4639	10.3386	10.7048	10.5024	12.6742	12.492	11.5655	12.2439	10.9476	10.5542	12.586	11.3626	12.4768	11.0109	11.1137	11.5338	10.4901	10.0743	10.579	10.3811	8.02161	9.8688	9.28509	9.0585	10.7048	10.5411	9.64808	10.298	11.6761	12.0688	12.0876	11.9442	6.27449	9.47788	9.14642	8.2996	13.0259	11.1003	13.6591	12.5951	11.3217	10.9012	11.3277	11.1835	0.621913	1
FBgn0001308	Khc	2R	12154465	22.5477	21.749	20.9488	21.7485	20.795	22.932	24.0297	22.5856	20.2026	25.3038	21.5659	22.3574	20.9742	19.5899	19.797	20.1204	19.828	20.7092	18.7372	19.7581	31.3848	24.2715	24.7434	26.7999	20.9488	25.3865	21.0684	22.4679	23.774	21.6812	18.1487	21.2013	21.1085	20.8616	21.5571	21.1757	23.8403	19.078	22.3065	21.7416	21.1963	20.6205	21.3075	21.0414	0.670623	1
FBgn0001311	kkv	3R	1203815	0.123599	0.337437	0.11392	0.191652	0.262876	0.0623258	0.304895	0.210032	0.347269	0.465971	0.141994	0.318411	0.0592713	0.107844	0.286431	0.151182	0.251047	0.199434	0.341687	0.264056	0.343668	0.201216	0	0.181628	0.11392	0.122602	0.177002	0.137841	0.262429	0.0855143	0.375802	0.241248	0.225161	0.159285	0.251762	0.212069	0.293951	0.231841	0.151967	0.22592	0.156933	0.234613	0.0309519	0.140833	0.431984	1
FBgn0001313	kl-2	YHet	81209	0	0	0	0	0	0	0	0	0	0	0	0	0	0	0	0	0	0	0	0	0	0	0	0	0	0	0	0	0	0	0	0	0	0	0	0	0	0	0	0	0	0	0	0	1	1
FBgn0001314	kl-3	YHet	34290	0	0	0	0	0	0	0	0	0	0	0	0	0	0	0	0	0	0	0	0	0	0	0	0	0	0	0	0	0	0	0	0	0	0	0	0	0	0	0	0	0	0	0	0	1	1
FBgn0001315	kl-5	YHet	311	0	0	0	0	0	0	0	0	0	0	0	0	0	0	0	0	0	0	0	0	0	0	0	0	0	0	0	0	0	0	0	0	0	0	0	0	0	0	0	0	0	0	0	0	1	1
FBgn0001316	klar	3L	434258	15.8468	15.3859	13.3506	14.8611	18.8161	17.666	17.9712	18.1511	15.3161	16.9395	13.7481	15.3346	15.4065	15.5175	15.1872	15.3704	13.4966	15.8819	15.8807	15.0864	17.7241	16.2551	14.5596	16.1796	13.3506	16.4027	17.8144	15.8559	14.4155	15.8091	15.4194	15.2147	10.3422	13.4808	12.525	12.116	13.551	11.0576	16.415	13.6745	12.7497	12.903	13.4122	13.0216	0.206812	1
FBgn0001319	kn	2R	10660152	1.33811	1.401	1.34589	1.36167	2.73647	1.19487	2.51686	2.1494	1.79235	2.46432	1.2824	1.84636	1.6714	2.27686	2.09898	2.01575	1.99443	1.89815	1.57059	1.82106	1.43284	2.44165	2.35388	2.07612	1.34589	1.79343	1.50372	1.54768	1.26553	1.43777	1.63694	1.44675	1.14836	1.62807	1.14103	1.30582	1.32841	1.63444	1.57286	1.5119	1.40999	1.00795	1.44987	1.28927	0.775803	1
FBgn0001320	kni	3L	20685430	6.1037	5.51124	5.18156	5.59883	6.55758	4.53767	8.5565	6.55058	5.02729	4.74882	4.79711	4.85774	5.30004	4.93209	5.81361	5.34858	4.76641	4.60616	4.27243	4.54833	7.14489	7.84366	5.55571	6.84809	5.18156	4.67301	4.48456	4.77971	4.34818	3.37354	5.01239	4.2447	3.38022	3.49098	4.05557	3.64226	3.63353	3.65846	4.47633	3.92277	3.67011	4.00603	4.42288	4.03301	0.0733519	1
FBgn0001321	knk	3R	5948087	1.1353	1.18042	0.581327	0.965682	1.71664	1.01818	1.36884	1.36789	1.11358	1.44366	1.06259	1.20661	0.938566	1.32047	0.920496	1.05984	0.630443	1.08522	1.00224	0.905968	1.16899	1.0951	1.30894	1.19101	0.581327	1.2511	0.903053	0.911827	1.13827	1.47188	1.33063	1.31359	1.68467	0.98698	0.975001	1.21555	0.546426	0.957712	0.941636	0.815258	0.640508	0.752327	1.26308	0.885305	1	1
FBgn0001323	knrl	3L	20590241	3.96936	3.56637	3.97664	3.83746	4.62377	5.65903	3.91574	4.73285	5.12454	4.93775	5.61678	5.22636	4.66175	4.06477	3.85362	4.19338	4.09699	4.2067	4.2924	4.1987	7.03705	6.55477	2.88516	5.49233	3.97664	3.65155	3.02695	3.55171	3.63368	4.8329	3.45129	3.97262	2.30483	2.85066	3.15695	2.77081	4.23628	3.07094	4.20837	3.83853	2.93559	2.94748	3.6721	3.18506	0.172859	1
FBgn0001324	kto	3L	19829714	4.52501	5.80157	4.79703	5.0412	4.98136	5.66489	5.65243	5.43289	3.56092	3.88675	6.56975	4.67247	3.93182	3.55943	3.85532	3.78219	3.60596	4.30645	4.82962	4.24734	4.40097	5.31711	5.00513	4.90774	4.79703	5.40763	4.81203	5.00556	3.51896	3.92586	3.33291	3.59258	3.92273	3.23933	4.0275	3.72985	4.59903	4.0461	4.30382	4.31632	4.1851	4.19958	3.73968	4.04145	0.382894	1
FBgn0001325	Kr	2R	21114138	0.79805	0.838687	1.01021	0.882316	0.846029	0.925897	0.799759	0.857228	0.762437	0.773181	0.417307	0.650975	0.940041	0.587025	0.905525	0.810864	1.17062	0.630956	0.654011	0.818529	1.2326	0.583417	1.0867	0.967572	1.01021	0.657699	0.956281	0.87473	0.753626	0.501969	0.43719	0.564262	0.384482	0.498607	0.472872	0.451987	0.983611	0.828752	0.934956	0.915773	0.543601	0.663401	0.574278	0.59376	0.171476	1
FBgn0001330	kz	X	2131891	1.97558	1.94246	1.66253	1.86019	2.1917	2.68655	1.69469	2.19098	0.89613	1.47454	1.44709	1.27259	2.33409	2.48762	1.88037	2.23403	1.82446	1.75502	2.40341	1.9943	2.5472	2.33026	2.27774	2.38507	1.66253	2.49893	2.52114	2.22753	1.7716	2.12475	1.92537	1.94057	1.91189	1.1201	1.19503	1.40901	2.72856	1.87488	2.60749	2.40364	1.96263	1.72312	1.41911	1.70162	0.012249	0.489159
FBgn0001332	L	2R	10368716	14.0977	14.7252	14.3049	14.3759	13.5307	12.7883	9.4416	11.9202	18.9947	17.5156	17.2336	17.9146	10.8784	11.7788	11.0235	11.2269	17.5335	19.1475	15.6374	17.4395	14.8624	17.965	15.21	16.0125	14.3049	10.6897	14.6293	13.208	14.2272	14.3065	13.1882	13.9073	20.1518	19.1147	20.3934	19.8866	17.7414	16.2635	16.9278	16.9776	14.7761	13.8145	12.6267	13.7391	6.68134e-06	0.00125531
FBgn0001337	Exp6	X	365085	7.20117	7.27466	6.71264	7.06282	8.14328	7.8435	6.78099	7.58926	5.91048	8.1165	6.51718	6.84805	6.51217	6.48165	6.66407	6.55263	6.05798	6.65865	7.03874	6.58512	7.88676	6.83767	8.963	7.89581	6.71264	7.95376	8.37728	7.68123	6.43472	6.6074	7.04943	6.69718	5.00069	6.47382	6.49364	5.98938	7.9166	6.60111	7.85964	7.45912	7.39602	6.03402	6.8418	6.75728	0.488906	1
FBgn0001341	l(1)1Bi	X	523816	2.29775	2.93855	2.03309	2.42313	3.04874	2.68922	2.35738	2.69845	1.84401	2.27903	1.90034	2.00779	3.30031	2.85425	2.6559	2.93682	2.23932	2.80041	2.47646	2.5054	2.21453	3.59056	3.92079	3.24196	2.03309	2.55239	2.5661	2.38386	2.56705	2.10195	2.54496	2.40465	1.63662	1.51815	1.98911	1.71463	2.91963	2.35507	2.37843	2.55104	2.33341	1.99329	1.65653	1.99441	0.203477	1
FBgn0001404	egh	X	2482534	27.8405	28.546	29.4379	28.6081	31.5656	26.5991	29.5454	29.2367	33.5128	28.1322	25.6803	29.1084	26.9725	23.2819	24.7108	24.9884	25.934	25.9138	27.0469	26.2982	27.6948	31.969	34.2714	31.3117	29.4379	28.8529	25.9884	28.0931	20.0599	23.705	27.1447	23.6365	16.4531	18.8803	18.2376	17.857	23.0585	23.8177	27.7435	24.8732	23.2021	21.678	24.6084	23.1628	0.77981	1
FBgn0001491	l(1)10Bb	X	11218331	18.6784	16.8503	15.1902	16.9063	19.0017	18.1063	16.2583	17.7888	17.6352	13.6222	15.145	15.4675	13.9804	14.5684	17.5318	15.3602	13.2704	16.5417	15.0553	14.9558	16.9701	18.282	14.3568	16.5363	15.1902	14.5296	14.9448	14.8882	17.9404	19.4867	20.6042	19.3438	13.6361	14.3278	16.2298	14.7312	15.6885	17.3787	16.9503	16.6725	16.9226	14.4957	19.8028	17.0737	0.645741	1
FBgn0001565	Hlc	X	21256545	20.0855	22.3755	22.9203	21.7938	23.0491	20.9085	21.0722	21.6766	25.9698	24.0207	19.6537	23.2147	17.5848	16.6868	17.9604	17.4107	18.8717	22.1138	21.3658	20.7838	19.2044	22.4881	24.9955	22.2293	22.9203	21.3965	20.3132	21.5433	30.4126	31.4715	32.7896	31.5579	22.0634	22.1734	26.4494	23.5621	28.8485	29.0464	31.494	29.7963	26.3869	23.163	19.3135	22.9545	0.322659	1
FBgn0001612	l(1)dd4	X	13630603	3.11711	4.05125	3.13418	3.43418	4.49904	3.7168	3.6341	3.94998	2.8806	3.15298	3.76138	3.26499	3.66682	3.03225	3.28096	3.32668	3.15705	2.94576	2.96931	3.02404	3.15127	2.05005	4.2473	3.14954	3.13418	3.55999	2.02865	2.90761	3.20644	4.01184	3.94403	3.72077	1.91135	2.38142	2.57965	2.29081	3.86438	3.18233	4.70071	3.91581	3.16549	3.12403	3.16845	3.15266	0.236976	1
FBgn0001624	dlg1	X	11263670	54.7056	53.9309	52.4551	53.6972	61.2415	64.7956	61.2768	62.438	52.9672	60.1545	61.4699	58.1972	57.5397	49.1219	54.639	53.7669	50.6692	52.535	48.9703	50.7248	57.9127	58.4404	64.7995	60.3842	52.4551	65.0722	62.7911	60.1061	56.0338	61.3741	68.5029	61.9703	44.9082	49.9411	48.9615	47.9369	63.341	54.6419	71.9103	63.2977	51.5883	50.7692	57.7676	53.375	0.422284	1
FBgn0001941	ifc	2L	5986348	18.2855	15.5508	18.8894	17.5752	18.3329	14.5712	13.5288	15.4776	18.1989	17.4579	12.6754	16.1107	11.2803	11.6737	13.8755	12.2765	13.226	12.0999	11.4747	12.2669	12.9661	10.8744	14.7897	12.8767	18.8894	13.1765	15.1054	15.7238	12.1313	13.9927	13.5558	13.2266	11.6711	10.1966	10.6584	10.842	15.0718	11.4438	14.1926	13.5694	12.5941	13.6323	17.0692	14.4319	0.650979	1
FBgn0001942	eIF-4a	2L	5981764	708.733	658.26	692.113	686.369	639.45	610.684	632.193	627.442	619.176	642.179	614.511	625.289	455.718	448.547	482.241	462.169	523.146	516.222	528.319	522.562	572.659	565.488	591.351	576.499	692.113	574.935	565.201	610.75	670.855	593.256	603.879	622.663	670.43	568.691	541.12	593.414	693.735	643.672	585.887	641.098	679.315	624.036	579.899	627.75	0.578703	1
FBgn0001961	Arpc1	2L	13827941	24.5974	20.8457	25.5225	23.6552	24.747	24.981	23.0343	24.2541	23.2306	25.7053	24.5018	24.4792	18.1164	18.1927	20.7299	19.013	17.5292	20.4084	19.66	19.1992	28.7403	25.3789	29.9156	28.0116	25.5225	24.1646	25.9187	25.2019	19.4466	20.3778	23.239	21.0211	22.7938	16.1257	16.5646	18.4947	21.5867	22.353	20.2427	21.3941	21.0454	18.6562	19.6427	19.7814	0.664252	1
FBgn0001965	Sos	2L	13813816	6.70191	6.99937	6.1219	6.60773	9.31375	8.2108	8.32324	8.61593	7.15528	8.95974	8.11072	8.07525	6.94936	6.26384	6.96896	6.72739	6.14943	6.49925	6.38725	6.34531	9.42702	6.75322	7.45098	7.87707	6.1219	7.63611	7.06823	6.94208	7.91934	7.42893	7.23254	7.52694	6.34475	6.60667	5.95093	6.30078	8.40979	6.44546	7.38511	7.41345	6.95783	5.80738	8.08868	6.9513	0.779758	1
FBgn0001967	NimC3	2L	14019407	0	0.327975	0.387648	0.238541	0	0.424346	0	0.141449	0	0	0.322077	0.107359	0	0	0	0	0	0	0	0	0	0.912811	0.484913	0.465908	0.387648	0.556184	0.301093	0.414975	0.180722	0.196299	0	0.125674	0.170211	0.914098	0	0.361436	0.202431	0	0	0.067477	0	0	0	0	1	1
FBgn0001970	Pgant35A	2L	14359252	0.468485	0	0.143932	0.204139	0.265643	0.361317	0	0.208987	0	0.446798	0	0.148933	0.101036	0.108979	0.182326	0.13078	0.0487791	0.223911	0.220757	0.164482	0	0.169462	0.180046	0.116503	0.143932	0.103255	0.111795	0.119661	0.268406	0.0747179	0.205908	0.183011	0.252794	0.0678802	0.0804677	0.133714	0.0751617	0.148201	0.38857	0.203978	0	0.0846685	0.312729	0.132466	0.88403	1
FBgn0001974	l(2)35Bd	2L	15009939	2.86017	2.82515	1.75745	2.48092	3.40575	2.88574	1.88102	2.72417	2.29537	3.63702	2.19027	2.70755	2.83745	2.66134	2.50454	2.66778	3.27584	2.87071	1.77844	2.64166	3.18067	2.89685	4.39683	3.49145	1.75745	2.89977	1.77456	2.14393	3.11345	2.84783	3.18465	3.04864	2.00635	2.15498	1.96507	2.04213	2.56969	3.43821	2.27739	2.76176	2.51728	3.30825	2.76842	2.86465	1	1
FBgn0001977	l(2)35Bg	2L	15036293	23.07	22.2363	19.4143	21.5735	22.1813	18.7945	20.9207	20.6322	24.1491	20.9088	21.178	22.0786	17.2439	16.3497	17.1901	16.9279	16.0237	19.2103	21.6311	18.955	19.653	16.4826	16.0252	17.3869	19.4143	18.0016	16.3104	17.9088	24.4439	20.8661	26.3254	23.8785	19.5427	19.7905	20.4526	19.9286	20.6213	21.1278	25.2435	22.3309	22.1911	20.4327	24.3195	22.3144	0.380688	1
FBgn0001978	stc	2L	15113480	5.80722	6.46057	9.33822	7.202	6	7.26204	7.68738	6.98314	5.26634	7.66661	6.81702	6.58332	7.91136	6.98136	7.66355	7.51876	6.75152	7.05997	6.3855	6.73233	10.2715	8.95795	9.053	9.42748	9.33822	9.35601	8.02189	8.90537	7.34538	7.77291	7.06845	7.39558	6.97968	6.53606	6.99144	6.83573	7.20416	7.84017	8.42427	7.82287	6.20598	6.29105	7.56319	6.68674	1	1
FBgn0001981	esg	2L	15333864	0.14749	0.345041	0.271879	0.254803	0.752673	0.744043	0.290995	0.595904	0.236729	0.140662	0.338836	0.238742	0.143138	0.154391	0.0430504	0.113526	0.184281	0.264346	0.203797	0.217475	0	0.320103	0.340096	0.220066	0.271879	0.195041	0.105587	0.190836	0.190126	0.481864	0.388948	0.353646	0.0596891	0.192332	0.0759992	0.10934	0.283952	0.209957	0.366992	0.286967	0.599115	0.2399	0.0738406	0.304285	0.188016	1
FBgn0001983	wor	2L	15423293	0	0	0	0	0	0	0	0	0	0.144193	0	0.0480643	0	0	0	0	0	0	0.0522281	0.0174094	0	0	0	0	0	0	0	0	0.0649661	0	0	0.0216554	0	0	0	0	0	0	0	0	0	0	0	0	1	1
FBgn0001986	l(2)35Df	2L	15752253	3.65419	3.94555	4.49068	4.03014	4.78157	4.53767	4.4367	4.58531	4.28609	3.57438	3.65933	3.83993	4.42536	3.75978	4.10234	4.09583	3.6877	3.52659	3.17196	3.46208	4.34151	3.86373	3.78097	3.9954	4.49068	3.90302	3.89045	4.09472	5.83784	3.62968	5.02416	4.83056	5.08117	3.70626	4.10385	4.29709	6.043	3.64576	4.89598	4.86158	4.4721	3.40367	3.89347	3.92308	0.266445	1
FBgn0001987	Gli	2L	15756001	4.69746	4.46687	4.40611	4.52348	4.62142	6.23615	5.10886	5.32214	6.21776	6.60411	5.05789	5.95992	4.91383	4.42842	4.20806	4.51677	3.45937	4.25393	4.60862	4.10731	4.73532	4.82982	5.608	5.05771	4.40611	6.17709	5.16831	5.2505	4.90828	5.38842	5.68736	5.32802	4.03462	4.78309	4.89975	4.57249	4.99878	4.78581	5.33451	5.0397	4.49531	5.13879	4.45709	4.69706	0.0872204	1
FBgn0001989	l(2)35Di	2L	15749601	51.1373	46.0763	57.5561	51.5899	56.8769	50.29	49.9614	52.3761	52.0881	50.1768	50.8328	51.0326	42.5419	47.4879	48.25	46.0933	50.5642	48.5424	51.7049	50.2705	54.871	50.1567	57.4815	54.1697	57.5561	56.9674	55.6848	56.7361	59.7928	46.6321	50.7867	52.4039	61.3715	55.8281	44.1902	53.7966	48.7521	54.2278	43.8008	48.9269	53.5342	48.6303	52.829	51.6645	0.903798	1
FBgn0001990	wek	2L	15766133	5.02511	2.52108	3.51744	3.68788	3.39318	3.07895	5.90335	4.12516	2.80152	2.6901	3.40769	2.96644	3.94681	3.70522	3.49967	3.71723	2.75144	3.77125	1.87818	2.80029	3.36357	3.92247	3.26763	3.51789	3.51744	4.19054	4.51568	4.07455	3.766	4.76331	3.59442	4.04124	2.94609	3.85755	2.9929	3.26551	4.14997	3.19235	4.04593	3.79608	3.87532	3.64693	2.90734	3.47653	0.603636	1
FBgn0001991	Ca-alpha1D	2L	16165831	12.9084	15.3575	13.5553	13.9404	18.6621	20.6414	19.1948	19.4994	12.366	20.7164	18.0082	17.0302	20.594	16.689	17.037	18.1067	17.9692	17.4504	17.5581	17.6592	18.6912	16.8148	17.6284	17.7115	13.5553	19.3984	18.6948	17.2162	15.2757	18.9923	22.7683	19.0121	11.6288	15.6354	14.4353	13.8998	21.6008	14.7809	23.1538	19.8452	15.7189	12.8479	16.6538	15.0735	0.304154	1
FBgn0001992	Cyp303a1	2L	16294207	0.565008	0.734328	0.173587	0.490974	0.320373	0.19002	0.371583	0.293992	0.453434	0.538852	0.865346	0.619211	0.852964	0.591445	0.879564	0.774658	0.470632	0.472575	0.520473	0.487893	0.349066	0	0.217141	0.188736	0.173587	0.996225	0.269655	0.479822	0.566486	0.52741	0.248331	0.447409	0.228658	0	0.776372	0.33501	0.815826	0.357471	0.468627	0.547308	0.382517	0.204225	0.754321	0.447021	0.227568	1
FBgn0001994	crp	2L	16264061	25.5472	29.8491	27.4576	27.618	32.63	34.7752	28.1921	31.8658	23.6298	28.3289	26.9248	26.2945	26.9785	25.8663	26.6173	26.4874	25.6171	25.2999	24.6803	25.1991	30.657	28.2868	33.4484	30.7974	27.4576	32.4095	30.1923	30.0198	25.1923	26.8382	25.7303	25.9203	16.2619	17.4666	18.0281	17.2522	30.6776	25.8065	29.0042	28.4961	22.9535	21.9742	26.1006	23.6761	0.0652104	1
FBgn0001995	mRpL4	2L	16328053	10.3122	12.4514	9.81123	10.8583	11.0344	15.1032	11.4855	12.541	9.34369	5.71055	11.9728	9.00901	9.68507	9.40188	9.51549	9.53415	8.00092	7.51227	8.27367	7.92895	12.3309	13.3564	9.9718	11.8864	9.81123	9.67783	6.90613	8.7984	11.4351	11.3338	11.989	11.586	11.1738	9.10961	8.57052	9.61798	12.3283	11.2072	8.77387	10.7698	8.61427	7.93579	10.3256	8.95855	0.162525	1
FBgn0002021	l(2)37Bb	2L	19049843	6.14371	8.19091	7.12388	7.15283	8.5967	7.19842	7.42926	7.74146	8.11146	7.7494	7.133	7.66462	8.39866	6.56949	7.23092	7.39969	6.93339	6.89098	7.3938	7.07272	9.91763	8.81758	7.76886	8.83469	7.12388	8.38655	5.817	7.10914	9.45257	7.95484	8.71057	8.70599	6.73722	7.15016	4.90181	6.26306	8.87103	8.7458	10.9475	9.52144	9.76109	7.62912	9.72362	9.03794	0.868759	1
FBgn0002022	Catsup	2L	19041714	15.1661	18.3812	16.8415	16.7963	18.4942	20.8325	16.7638	18.6968	19.5033	19.692	22.1085	20.4346	20.275	19.5738	22.134	20.6609	20.0908	22.2043	19.7568	20.684	15.5786	21.0184	17.4858	18.0276	16.8415	19.3309	23.4151	19.8625	21.4347	19.615	18.2306	19.7601	26.3257	26.2902	25.1394	25.9184	21.1072	20.1156	18.8231	20.0153	22.8239	23.4797	23.5106	23.2714	0.208245	1
FBgn0002023	Lim3	2L	19079256	1.74265	2.05913	2.61088	2.13755	2.78104	1.89141	2.78494	2.4858	1.61756	2.59433	3.23352	2.4818	2.40987	2.29614	1.85193	2.18598	1.728	3.06153	2.50857	2.4327	0.47558	2.20007	2.48838	1.72134	2.61088	2.59125	3.39215	2.86476	2.31079	1.67425	2.39457	2.12654	2.28294	1.36684	1.41268	1.68749	3.0985	2.52346	2.66941	2.76379	2.0587	2.11533	2.51811	2.23071	1	1
FBgn0002031	l(2)37Cc	2L	19122040	35.0782	33.3008	30.2225	32.8672	29.6425	33.0836	36.1088	32.945	33.863	30.7877	29.5874	31.4127	39.4794	36.8969	39.2587	38.545	30.0923	29.704	29.4156	29.7373	42.0156	38.6174	41.6155	40.7495	30.2225	33.6142	30.7532	31.53	43.9078	37.964	35.4156	39.0958	43.8228	33.9207	33.5474	37.097	38.3064	34.4962	36.8108	36.5378	38.591	38.1755	36.6508	37.8058	0.918369	1
FBgn0002036	CG10561	2L	19114401	7.88644	7.43113	8.93459	8.08405	6.98719	7.79118	7.29365	7.35734	7.25207	7.67805	6.54257	7.15756	5.74028	6.24892	6.09057	6.02659	6.82574	6.77294	6.35671	6.6518	7.30846	6.95346	6.06176	6.77456	8.93459	6.84408	8.46873	8.08247	7.97767	7.66838	8.44895	8.03167	7.0482	6.21337	6.51894	6.5935	8.6987	6.54887	8.09467	7.78075	6.75744	5.87937	7.6499	6.76224	1	1
FBgn0002044	swm	2L	19493251	16.7909	23.3147	17.3113	19.139	23.0508	24.9564	18.6979	22.235	20.7775	19.8381	20.2851	20.3002	18.2754	18.091	19.0093	18.4586	17.9795	17.1265	18.8124	17.9728	22.2897	21.8545	19.7728	21.3057	17.3113	22.2912	19.0223	19.5416	16.7761	16.0644	15.9595	16.2667	13.3823	14.3023	15.369	14.3512	18.7992	15.7229	18.6152	17.7124	17.4619	15.7126	18.0778	17.0841	0.457557	1
FBgn0002069	Aats-asp	2R	8767824	32.9457	27.2944	23.9009	28.047	22.0768	25.1455	23.2534	23.4919	25.23	21.8044	21.4446	22.8263	27.9423	26.2714	29.3475	27.8537	25.0157	26.3741	24.5402	25.31	30.6894	30.5649	32.8689	31.3744	23.9009	29.2332	27.9849	27.0397	24.8682	25.5747	21.6153	24.0194	34.134	30.6665	30.4515	31.7507	28.3549	26.655	26.6859	27.2319	29.8207	37.1169	40.5276	35.8217	0.755659	1
FBgn0002121	l(2)gl	2L	9839	20.5344	18.9422	18.9701	19.4822	16.1864	16.563	16.1577	16.3024	15.5207	14.3786	12.7591	14.2195	15.2167	15.4861	15.2523	15.3184	12.2245	12.8099	13.0547	12.6964	18.2712	12.3356	17.8622	16.1563	18.9701	15.8665	16.9609	17.2658	13.9304	16.0869	14.8249	14.9474	9.19131	10.9795	13.181	11.1173	17.5645	16.4094	18.5402	17.5047	17.8755	18.2498	19.1946	18.44	0.186231	1
FBgn0002174	l(2)tid	2R	19594385	9.06155	7.35904	8.16199	8.19419	9.92764	11.4868	7.54192	9.65212	7.47986	10.19	9.10818	8.92601	9.35156	8.05041	9.45665	8.95287	9.20452	7.82608	7.04491	8.02517	12.0739	11.5896	11.9581	11.8739	8.16199	11.1677	9.66392	9.66454	10.9826	8.52808	7.6191	9.04326	13.3543	9.24117	8.83357	10.4763	9.30712	8.68139	7.22243	8.40365	9.56259	9.5468	8.93318	9.34752	0.646287	1
FBgn0002183	dre4	3L	1871574	6.47085	7.03573	7.33003	6.94554	6.67012	6.76581	7.57486	7.0036	5.23011	6.83105	7.17904	6.4134	6.98155	6.80849	6.78397	6.858	5.13762	5.80525	5.34249	5.42845	8.4842	7.17115	8.3116	7.98898	7.33003	9.35316	6.43678	7.70666	5.95409	7.97762	6.1523	6.69467	6.06812	5.66006	6.16271	5.96363	8.71216	7.99499	7.55474	8.0873	6.37031	6.68155	7.62398	6.89195	0.57768	1
FBgn0002283	l(3)73Ah	3L	16581575	8.93022	8.15763	7.05504	8.04763	5.85937	7.98037	8.55791	7.46588	7.57631	9.24686	7.4248	8.08266	5.86036	7.21141	8.34121	7.13766	6.69473	7.9571	7.13926	7.2637	13.7141	8.30641	6.766	9.5955	7.05504	7.76048	6.21041	7.00864	7.89381	7.85967	10.9901	8.91453	7.95096	7.09814	6.96817	7.33909	7.35185	5.81146	8.76133	7.30821	10.6235	6.91692	9.7083	9.08291	0.652635	1
FBgn0002284	Prosbeta6	3L	16602500	25.3697	31.765	29.3109	28.8152	20.97	26.6781	22.5595	23.4025	28.3891	22.4914	25.9948	25.6251	28.4355	26.058	24.0926	26.1954	26.7871	24.208	25.1803	25.3918	37.7491	42.2649	43.2569	41.0903	29.3109	28.8238	34.789	30.9746	33.6247	26.3498	33.2943	31.0896	37.5978	30.7532	24.8563	31.0691	26.8289	29.5021	28.0956	28.1422	31.2063	37.1967	32.916	33.773	0.206165	1
FBgn0002306	sas	3R	2988551	7.62845	8.90864	7.00643	7.84784	7.19093	8.46268	10.3682	8.67394	8.99742	10.0765	7.02218	8.6987	6.94045	7.32821	6.9278	7.06549	6.91321	7.08762	6.34882	6.78322	8.45639	7.55652	7.47138	7.8281	7.00643	6.51577	6.97349	6.8319	6.39036	6.22833	5.95406	6.19092	4.26956	4.80347	5.68472	4.91925	5.59562	6.8145	7.23369	6.54794	5.43071	5.80671	6.23919	5.82554	0.644685	1
FBgn0002354	l(3)87Df	3R	8856664	7.79906	6.58858	4.79219	6.39328	6.63339	8.52453	6.41142	7.18978	9.38845	6.19835	7.46549	7.6841	10.9329	9.29788	6.44993	8.89357	12.1807	5.59129	8.53139	8.76779	9.63665	5.64219	7.49326	7.5907	4.79219	7.73514	5.58327	6.03687	12.0085	8.79677	13.7113	11.5055	9.99488	8.47522	8.70725	9.05912	7.82029	8.94349	10.9968	9.25353	9.57011	6.69517	10.7376	9.00096	0.628159	1
FBgn0002413	dco	3R	26880905	25.7599	24.2467	25.131	25.0459	30.8551	28.0561	24.879	27.9301	25.2259	28.6357	26.8847	26.9154	26.9417	23.3685	25.166	25.1587	23.6995	25.5124	24.6364	24.6161	28.3525	25.2625	28.8446	27.4865	25.131	28.2641	23.647	25.6807	24.6658	25.1104	21.1511	23.6424	17.8115	20.2597	20.2356	19.4356	23.7931	22.8193	23.9409	23.5178	21.1928	22.4029	20.0101	21.2019	0.887783	1
FBgn0002431	hyd	3R	5540345	19.2578	18.0325	19.3944	18.8949	19.9842	20.4053	18.3742	19.5879	18.4684	21.0256	19.6156	19.7032	20.1929	18.9266	19.3266	19.482	18.4411	20.5895	17.9411	18.9906	18.191	19.3246	19.9315	19.149	19.3944	19.4441	19.1893	19.3426	18.0995	21.117	20.7356	19.984	16.7157	19.1337	21.13	18.9931	20.3988	19.0524	22.8676	20.7729	18.7638	18.2622	19.2642	18.7634	0.422861	1
FBgn0002440	l(3)mbn	3L	6117034	0	0	0	0	0	0	0	0	0.233262	0	0.111291	0.114851	0.0470136	0	0.0848395	0.043951	0.136186	0.0520947	0.0502028	0.0794945	0	0	0	0	0	0	0	0	0	0	0.191625	0.063875	0	0	0	0	0	0.0689606	0.144647	0.0712025	0.0737923	0	0.072759	0.0488504	0.506188	1
FBgn0002441	l(3)mbt	3R	23091952	5.55929	6.23162	5.66025	5.81705	5.00658	6.58333	5.69302	5.76098	6.25361	6.0776	4.70282	5.67801	5.81179	5.05758	5.34846	5.40594	5.13254	5.50939	5.5682	5.40338	7.29513	6.446	5.22851	6.32321	5.66025	6.96295	5.76993	6.13104	5.14128	5.31516	5.28298	5.24647	4.02024	4.56245	4.08862	4.22377	5.75796	5.0669	6.05526	5.62671	5.74606	5.34368	5.59897	5.5629	0.827058	1
FBgn0002466	sti	3L	12501098	0.055497	0.0865539	0.255754	0.132602	0.0472022	0.0559932	0	0.0343985	0.0890758	0.105856	0	0.0649773	0.0718124	0.0193646	0.0161989	0.035792	0.0173352	0.0198934	0	0.0124095	0	0	0	0	0.255754	0.0733895	0.119189	0.149444	0	0.051804	0.048784	0.0335293	0.0449191	0.0241234	0.114387	0.0611432	0.106844	0.026334	0.138091	0.090423	0.0845373	0	0.111138	0.0652251	0.694269	1
FBgn0002521	pho	4	1193094	21.4068	23.5635	23.6607	22.877	27.513	21.425	23.1259	24.0213	26.8171	24.9041	23.835	25.1854	24.0399	22.696	22.7327	23.1562	19.1769	21.1413	23.72	21.3461	15.8452	15.4918	20.5569	17.298	23.6607	19.9554	14.4302	19.3488	22.8312	21.5444	24.1178	22.8311	11.2881	17.3334	18.8239	15.8151	21.8423	18.8801	23.711	21.4778	22.4413	20.5627	25.1088	22.7043	0.501688	1
FBgn0002522	lab	3R	2487149	0	0.379152	0.560176	0.313109	0.92115	0.12264	1.25884	0.767543	0.354327	0.463854	0.744666	0.520949	0.983056	0.414582	0.674118	0.690585	0.379736	0.392154	0.545864	0.439251	0	0.727413	1.12116	0.616191	0.560176	0.321485	0.479878	0.453846	1.30511	0.983948	0.427401	0.905486	0.688694	0.581214	0.782422	0.68411	0.527036	0.576788	0.484008	0.529277	0.655362	0.363439	0.866651	0.628484	1	1
FBgn0002524	lace	2L	15499110	7.62535	6.9082	6.20133	6.91163	8.20242	5.31758	7.07984	6.86661	7.19947	7.91403	6.61222	7.24191	6.92873	6.26051	6.93907	6.70944	4.8338	6.02951	7.01139	5.95823	8.1057	5.23258	5.94727	6.42852	6.20133	5.93165	6.50252	6.21183	7.70954	7.27494	7.2944	7.42629	6.12657	6.28795	6.87613	6.43022	7.17834	6.33206	7.64532	7.05191	7.11735	6.62711	7.74752	7.16399	0.512782	1
FBgn0002525	Lam	2L	5542544	11.3263	10.9059	9.96626	10.7328	9.73932	10.4481	9.55561	9.91434	9.69569	8.677	10.0069	9.45986	10.2332	9.78618	10.9278	10.3157	8.03154	8.10908	9.00361	8.38141	12.9953	11.7057	11.4419	12.0476	9.96626	9.91402	9.4212	9.76716	10.2436	8.1147	8.87467	9.07766	6.199	8.01799	7.17029	7.12909	8.9819	7.2767	9.73717	8.66526	9.74941	8.48257	10.109	9.44699	1	1
FBgn0002526	LanA	3L	6196931	6.86738	6.70529	6.56892	6.71386	7.46071	7.74393	7.42929	7.54464	5.71967	6.52195	6.6068	6.28281	8.92363	9.64536	8.88549	9.15149	5.46192	6.53689	6.03038	6.00973	9.03807	10.8026	9.78072	9.8738	6.56892	8.29923	7.16786	7.34534	6.44726	6.01985	6.10009	6.18907	5.04464	5.21766	5.62021	5.29417	5.45794	5.86011	5.44224	5.58676	4.82023	5.45992	3.68373	4.65463	0.0730991	1
FBgn0002528	LanB2	3L	9608019	11.6495	10.6365	10.8991	11.0617	10.5058	10.4543	9.81742	10.2592	6.76516	7.59293	6.36575	6.90795	20.5662	21.2232	18.7275	20.1723	7.00346	8.01602	6.73402	7.25117	22.785	26.5539	25.1752	24.838	10.8991	19.818	14.7937	15.1703	10.1121	8.63389	6.81834	8.52144	7.46274	6.51424	7.20941	7.06213	9.9179	10.639	8.27367	9.61019	9.15511	12.7593	12.4853	11.4666	1.57707e-05	0.00265931
FBgn0002531	Lcp1	2R	4318139	0	0	0	0	1.07854	0	0	0.359513	0.508832	0	0.485535	0.331456	0.205108	0.221235	0.370135	0.265493	0	1.13639	1.53317	0.889853	0	0	0	0	0	0	0.453901	0.1513	0	0	0.278671	0.0928903	0	0.275603	0	0.0918677	0	0.183342	0	0.061114	0.321938	0	0	0.107313	1	1
FBgn0002533	Lcp2	2R	4321472	0	0.366857	0	0.122286	0	0	0	0	0	0	0	0	0	0	0	0	0.146949	0.168636	0	0.105195	0	0	0	0	0	0	0	0	0	0	0	0	0	0	0	0	0	0	0	0	0	0	0	0	1	1
FBgn0002534	Lcp3	2R	4322949	0	0	0.606025	0.202008	0	0	0	0	0	0	0	0	0.425411	0	0	0.141804	0	0	0	0	1.21866	0	0	0.40622	0.606025	0	0	0.202008	0	0	0	0	0	0	0	0	0.222396	0.312001	0	0.178132	0	0	0	0	1	1
FBgn0002535	Lcp4	2R	4325162	0	0	0	0	0	0	0	0	0	0	0	0	0.137776	0	0	0.0459253	0	0	0	0	0	0	0	0	0	0	0	0	0	0	0	0	0	0	0	0	0	0	0	0	0	0	0	0	1	1
FBgn0002542	lds	3R	3746156	0.476426	0.445824	0.439115	0.453788	1.45878	0.576823	0.751983	0.929195	0.841159	1.27224	1.02155	1.04498	0.955557	0.864446	0.77875	0.866251	0.714324	1.02468	0.493732	0.744245	0.883019	0.930603	0.87887	0.897497	0.439115	0.819036	0.75035	0.6695	1.26924	0.889445	0.921352	1.02668	0.732675	0.497021	0.540088	0.589928	0.733782	0.45214	0.663862	0.616595	0.725729	0.826594	0.76327	0.771864	0.653479	1
FBgn0002543	lea	2L	1380086	2.33865	2.84157	2.5064	2.56221	2.31291	2.96317	3.21915	2.83174	2.13871	2.64534	2.45728	2.41378	2.63911	2.12546	2.73049	2.49835	1.76681	1.93006	2.4236	2.04016	2.11685	3.069	2.00658	2.39748	2.5064	2.19362	2.99801	2.56601	2.17339	2.5384	2.12747	2.27975	1.65079	1.67851	2.04581	1.7917	2.14651	2.01298	2.35473	2.17141	1.87786	3.09623	3.10409	2.69273	0.349345	1
FBgn0002552	lin	2R	4802033	1.57103	2.01781	2.21458	1.93447	2.43663	1.95804	3.28194	2.55887	2.81825	2.20339	3.53844	2.85336	1.40509	1.80577	2.104	1.77162	2.59799	1.98759	2.80927	2.46495	2.39794	2.20625	1.59822	2.06747	2.21458	2.01644	1.45547	1.8955	2.85908	1.85468	2.39643	2.37006	3.25378	2.37004	2.33334	2.65239	2.84667	2.45568	2.94334	2.74856	2.76851	2.80589	2.2208	2.5984	0.525878	1
FBgn0002561	l(1)sc	X	303756	0	0	0	0	0	0	0	0	0	0	0.235896	0.078632	0	0	0	0	0	0	0	0	0	0	0	0	0	0	0.220526	0.0735087	0	0	0	0	0	0	0	0	0	0	0	0	0	0	0	0	1	1
FBgn0002562	Lsp1alpha	X	12384416	18.5789	28.8685	10.8451	19.4308	16.8555	23.6048	19.957	20.1391	20.6532	15.8813	48.4258	28.3201	25.3319	22.0413	14.662	20.6784	48.2322	86.355	35.8215	56.8029	21.1709	18.8171	8.48884	16.1589	10.8451	18.1536	37.0441	22.0143	9.5207	4.72103	1.57266	5.27146	49.2346	57.1889	36.698	47.7072	6.92187	11.526	2.94495	7.13094	21.0334	6.56621	5.47754	11.0257	0.0251898	0.733536
FBgn0002563	Lsp1beta	2L	898644	2219.25	2124.38	1534.24	1959.29	950.219	1099.62	1315.81	1121.88	1266.11	1399.9	1367.83	1344.61	695.552	1063.34	838.069	865.654	1523.94	1423.07	1049.38	1332.13	2270.32	2667.08	1937.71	2291.7	1534.24	2314.42	3107.21	2318.62	803.482	1430.27	1044.38	1092.71	1862.39	971.978	1542.24	1458.87	878.836	2107.32	1964.41	1650.19	894.296	1314.66	1185.78	1131.58	0.00719994	0.343599
FBgn0002564	Lsp1gamma	3L	66433	0.13487	0.105172	0	0.080014	0.229423	0.272151	0	0.167191	0	0.128626	0	0.0428753	0.0872599	0.0470602	0	0.0447734	0.0421283	0.145036	0.0465897	0.077918	0	0	0	0	0	0.178353	0.193104	0.123819	0	0	0.0592778	0.0197593	0	0	0.138993	0.046331	0.129828	0	0.0671181	0.0656487	0.0684814	0.146249	0	0.0715768	0.385259	1
FBgn0002565	Lsp2	3L	12122493	1412.63	1649	894.358	1318.66	968.516	1509.31	1246.38	1241.4	4056.51	3668.49	4997.05	4240.68	682.701	568.156	580.182	610.346	3677.73	3585.26	2862.4	3375.13	567.381	580.036	361.387	502.935	894.358	447.221	862.985	734.855	1372.33	1270.59	830.131	1157.68	9903.12	8117.06	8221.96	8747.38	820.907	1909.44	1028.67	1253.01	1549.77	827.502	956.584	1111.29	5.10159e-37	1.60006e-33
FBgn0002566	lt	2L	22817519	18.6357	16.1556	16.5384	17.1099	17.4659	18.426	19.3957	18.4292	15.6418	19.0184	19.4621	18.0408	17.2794	16.3844	17.6708	17.1115	15.975	16.8218	16.7457	16.5142	13.8724	9.82522	13.9498	12.5491	16.5384	15.1557	13.7254	15.1398	18.2272	21.0984	21.7671	20.3642	12.5987	16.4655	17.5247	15.5296	20.0074	17.3834	21.0934	19.4947	17.3085	17.3016	20.1204	18.2435	0.38458	1
FBgn0002567	ltd	2R	5065369	49.364	56.5385	57.5218	54.4748	69.769	66.833	68.4736	68.3585	53.2923	72.2354	69.2586	64.9288	53.6193	46.1468	58.3715	52.7125	58.4896	61.538	51.253	57.0935	59.4563	53.1176	57.5775	56.7171	57.5218	59.0354	56.9441	57.8338	60.1532	66.2838	63.0562	63.1644	49.1761	47.7361	54.5382	50.4835	59.3072	55.5745	61.9428	58.9415	52.6031	55.2129	66.9978	58.2713	0.903213	1
FBgn0002569	Mal-A2	2R	4341137	0	0	0	0	0	0	0	0	0	0	0.126932	0.0423107	0.0536209	0.115673	0.0967629	0.0886856	0.103551	0.0594161	0	0.0543224	0	0.179871	0	0.059957	0	0.109597	0	0.0365323	0.0712233	0	0.072852	0.0480251	0.134161	0	0	0.0447203	0	0	0	0	0	0	0.0829846	0.0276615	1	1
FBgn0002570	Mal-A1	2R	4337166	2.21914	1.44209	2.55669	2.07264	2.83119	2.79873	1.8243	2.48474	3.41343	3.17462	3.11553	3.23453	1.91436	1.35507	1.29548	1.52164	1.79071	1.19321	2.23587	1.73993	2.39926	2.00678	1.91891	2.10832	2.55669	1.22275	2.38299	2.05414	1.98656	1.72623	2.43839	2.05039	1.42197	1.045	1.42936	1.29878	1.15709	1.40401	2.30074	1.62061	1.31459	1.40371	1.7591	1.49247	0.102303	1
FBgn0002571	Mal-A3	2R	4343414	0	0	0	0	0	0	0	0	0	0	0	0	0	0	0.055065	0.018355	0	0	0	0	0	0	0	0	0	0	0	0	0	0	0	0	0	0	0	0	0	0	0.0938827	0.0312942	0	0	0	0	1	1
FBgn0002573	sens	3L	13389329	0	0.321954	0	0.107318	0.468207	0.138852	0	0.202353	0	0.13125	0	0.04375	0.08904	0	0.0803396	0.0564599	0.128963	0.0493316	0.0950802	0.0911249	0	0.149342	0	0.0497807	0	0	0.295565	0.0985217	0.11827	0.0642317	0	0.0608339	0.0556952	0.059821	0.070914	0.0621434	0	0.130606	0.0684873	0.0663644	0.349392	0.149232	0.0688999	0.189175	0.236143	1
FBgn0002576	lz	X	9178682	3.48131	2.57884	3.31729	3.12581	2.77639	3.85774	3.12966	3.2546	3.57863	4.35638	3.83075	3.92192	2.58366	3.22417	3.47181	3.09321	2.69116	2.53712	2.97229	2.73352	5.04773	3.06504	3.75748	3.95675	3.31729	4.02974	3.65894	3.66866	3.15337	3.34884	4.74423	3.74881	2.69293	3.46484	3.24935	3.13571	3.94108	4.03148	6.15762	4.71006	2.99258	3.07784	3.7372	3.26921	0.267548	1
FBgn0002577	m	X	11648306	0	0	0	0	0.0842567	0	0.0977247	0.0606605	0.0795008	0.0944771	0	0.0579926	0.0320465	0	0.0578304	0.029959	0.0309435	0	0.0342205	0.0217213	0.0918029	0	0	0.030601	0	0	0.141836	0.0472787	0.0212833	0	0.04354	0.0216078	0	0.0861212	0	0.0287071	0.0476797	0.0470066	0	0.0315621	0.0503001	0	0	0.0167667	1	1
FBgn0002578	Kaz-m1	3R	21840446	0	0	0	0	0	0	0	0	0	0	0	0	0.163596	0.0691525	0	0.0775828	0	0	0	0	0	0	0	0	0	0	0	0	0.0851583	0	0	0.0283861	0	0	0.260585	0.0868617	0	0.479932	0	0.159977	0	0	0	0	1	1
FBgn0002579	RpL36	X	522350	916.571	977.591	877.851	924.004	793.584	853.268	868.748	838.533	901.04	887.388	846.982	878.47	721.983	702.216	757.341	727.18	844.361	776.991	827.586	816.313	910.031	947.594	951.845	936.49	877.851	865.675	842.847	862.124	970.874	852.604	825.31	882.929	1155.01	947.802	779.914	960.909	1044.66	1053.43	863.658	987.249	1084.81	996.833	922.458	1001.37	0.139605	1
FBgn0002590	RpS5a	X	17037620	644.636	626.98	636.332	635.983	553.99	568.005	579.106	567.034	638.283	564.753	538.968	580.668	463.02	476.572	511.972	483.855	552.076	533.284	523.73	536.363	695.373	682.413	623.15	666.979	636.332	597.877	628.686	620.965	767.586	662.871	624.92	685.126	979.033	780.437	710.487	823.319	808.139	800.849	610.39	739.793	884.004	775.813	716.577	792.131	0.406002	1
FBgn0002592	E(spl)m2-BFM	3R	21842236	0.352466	0	0.324863	0.225776	1.79871	0.711234	0.347704	0.952549	1.13145	1.00845	1.61947	1.25312	0.912171	0.737916	1.33744	0.995842	0.550485	0.505378	0.487025	0.514296	1.30654	0	2.43824	1.24826	0.324863	2.09746	0.504653	0.975659	0.454355	0.329011	1.23932	0.674229	0.427928	0.766047	0.726479	0.640151	1.35715	0.334499	0.701619	0.797756	0.71587	0.382203	0.882307	0.660127	0.682233	1
FBgn0002593	RpLP1	2L	419952	1534.89	1481.78	1399.69	1472.12	1337.48	1297.02	1258.11	1297.54	1569.65	1456.01	1356.31	1460.66	1041.2	1038.83	1128.25	1069.43	1251.78	1215.42	1266.86	1244.69	1544.24	1410.54	1482.96	1479.25	1399.69	1369.76	1446.68	1405.38	1680.2	1448.41	1307.49	1478.7	1663.8	1553.42	1421.02	1546.08	1765.14	1797.51	1393.53	1652.06	1917.16	1732.8	1522.48	1724.15	0.0188929	0.626382
FBgn0002607	RpL19	2R	20855968	1049.99	975.601	984.427	1003.34	871.676	907.685	870.264	883.208	1065.37	958.933	900.057	974.787	742.143	741.4	775.304	752.949	897.599	907.08	903.436	902.705	1161.28	1067.81	1054.19	1094.43	984.427	950.587	975.501	970.172	1246.92	1092.23	1083.64	1140.93	1494.42	1283.36	1157.73	1311.84	1290.09	1298.33	1060.46	1216.29	1387.74	1231.88	1068.38	1229.33	0.040751	0.910339
FBgn0002609	E(spl)m3-HLH	3R	21847437	0.716156	0.372309	1.32014	0.802868	1.42127	2.16768	1.17747	1.58881	1.7242	0.455336	2.01087	1.3968	0.617798	0.832962	1.25422	0.90166	1.04393	1.36914	0.329854	0.914308	0.442447	0.777149	0.55046	0.590019	1.32014	0.947049	0.854481	1.04056	0.71803	1.11417	1.36398	1.06539	0.579656	1.03766	0.738047	0.785121	0.804278	1.01947	0.475194	0.766314	0.606058	0.776577	1.07563	0.819422	1	1
FBgn0002622	RpS3	3R	19184535	743.275	697.745	711.547	717.522	624.883	630.204	613.973	623.02	709.989	632.002	602.904	648.298	497.672	483.94	563.727	515.113	571.803	576.07	568.168	572.014	744.819	717.498	718.433	726.917	711.547	639.977	662.457	671.327	805.985	717.847	672.554	732.129	973.23	765.383	680.244	806.286	844.073	842.781	676.463	787.772	889.326	796.476	695.109	793.637	0.241842	1
FBgn0002626	RpL32	3R	25870951	628.834	609.719	613.745	617.433	543.397	670.835	594.324	602.852	663.409	594.369	555.413	604.397	456.176	436.655	496.334	463.055	543.878	537.952	521.442	534.424	706.339	648.853	631.736	662.309	613.745	546.813	595.709	585.422	742.128	636.416	669.677	682.74	1176.65	741.266	617.174	845.03	771.214	762.519	587.293	707.009	816.505	694.176	642.136	717.606	0.501092	1
FBgn0002629	E(spl)m4-BFM	3R	21849548	0	0	0	0	0	0	0	0	0	0	0	0	0	0	0	0	0	0	0	0	0	0	0	0	0	0	0	0	0	0	0	0	0	0	0	0	0	0	0	0	0	0	0	0	1	1
FBgn0002631	E(spl)m5-HLH	3R	21854576	0	0	0	0	0.325277	0	0	0.108426	0	0	0	0	0	0	0	0	0	0	0	0	0	0	0	0	0	0	0	0	0	0	0	0	0	0	0	0	0	0	0	0	0	0	0	0	1	1
FBgn0002632	E(spl)m6-BFM	3R	21858633	0	0	0	0	0	0	0	0	0	0	0	0	0	0	0	0	0	0	0	0	0	0	0	0	0	0	0	0	0.127475	0	0.13039	0.085955	0	0.128955	0	0.042985	0.142787	0	0	0.0475957	0.150635	0	0	0.0502117	1	1
FBgn0002633	E(spl)m7-HLH	3R	21862760	0	0	0	0	0	0	0	0	0	0	0	0	0.222237	0	0	0.074079	0.214588	0.123128	0	0.112572	0	0	0	0	0	0	0	0	0.442788	0	0.150971	0.19792	0	0.149309	0	0.0497697	0	0	0	0	0	0.372472	0	0.124157	1	1
FBgn0002638	Rcc1	3L	5923362	6.149	5.8243	6.88745	6.28692	7.20355	6.23512	4.51366	5.98411	5.479	5.28263	6.77352	5.84505	8.7282	7.04454	7.90247	7.89174	4.67293	5.99168	6.12483	5.59648	7.49605	11.7803	9.43298	9.56978	6.88745	9.48993	7.92384	8.10041	5.95561	6.04905	5.57445	5.8597	5.68834	6.4377	6.03196	6.05267	5.23759	6.00063	6.84079	6.02634	7.84713	6.87106	7.80661	7.50827	0.715043	1
FBgn0002641	mal	X	20300708	2.52745	3.03851	1.8442	2.47005	2.23926	1.91254	1.97387	2.04189	1.69029	2.10914	2.74193	2.18045	1.83965	1.91079	1.99802	1.91615	1.48028	2.00073	1.67342	1.71814	1.95185	1.94275	1.94268	1.94576	1.8442	3.41195	1.88477	2.38031	2.17205	2.31011	1.94401	2.14206	2.13095	1.9226	2.76751	2.27369	2.38227	2.19873	2.35835	2.31312	2.94098	2.34101	2.37256	2.55152	0.701635	1
FBgn0002643	mam	2R	9878686	19.583	21.2775	18.0376	19.6327	22.9504	22.0443	22.0026	22.3324	18.1348	24.1836	22.1349	21.4844	23.4075	19.6014	22.2512	21.7534	21.0121	21.3199	20.93	21.0873	24.411	17.8651	19.3405	20.5389	18.0376	21.0315	20.9586	20.0092	16.4923	16.6026	15.4429	16.1793	16.0373	17.3822	17.4098	16.9431	19.663	15.7815	19.2856	18.2434	17.1024	15.496	15.0802	15.8929	0.762156	1
FBgn0002645	Map205	3R	27882314	18.3088	16.4808	18.1627	17.6508	20.8438	17.0635	16.117	18.0081	15.5253	16.4777	17.7477	16.5836	19.8979	20.0535	19.8606	19.9373	15.3509	18.5163	19.1932	17.6868	18.4323	18.0766	20.7877	19.0989	18.1627	17.7371	18.6874	18.1957	16.1404	19.8152	18.7474	18.2343	9.72541	12.5916	12.2368	11.5179	15.9184	14.9952	17.1319	16.0152	15.11	15.0315	16.9418	15.6944	0.556713	1
FBgn0002652	squ	2L	16680056	0.982445	0.766125	1.81103	1.18653	1.39269	0.770621	2.28759	1.48363	2.89097	2.18627	1.75548	2.27757	0.764054	1.1427	0.781632	0.896129	1.74226	1.05651	1.47065	1.42314	0.606969	2.13226	0.755146	1.16479	1.81103	1.73227	3.25636	2.26655	2.70521	1.37562	0.575743	1.55219	1.45786	1.30631	2.09836	1.62084	1.57621	1.40738	1.30378	1.42912	2.49425	0.420682	0.983729	1.29955	0.595517	1
FBgn0002673	twe	2L	16259414	0.653068	1.29161	0.971442	0.97204	1.24978	1.15309	0.742669	1.04851	0.655131	0.311418	1.3753	0.780616	0.445671	0.854532	0.714832	0.671678	0.509984	0.373512	0.563992	0.482496	0.302603	0.177172	0.752953	0.410909	0.971442	0.43181	0.467525	0.623592	0.84112	0.351362	0.198506	0.463663	0.792196	0.719969	0.387913	0.633359	0.157163	0.542305	0.674393	0.457954	0.331601	0.653122	0.653915	0.546213	0.547602	1
FBgn0002707	mei-9	X	4208263	0.841871	1.09416	1.46567	1.1339	1.90944	1.03815	1.10733	1.35164	1.50139	2.58712	1.43264	1.84038	1.27093	1.14238	1.11944	1.17758	0.993437	1.27417	1.2279	1.16517	1.38697	0.812063	1.29418	1.1644	1.46567	1.42254	1.40627	1.43149	1.72834	1.0478	1.52118	1.43244	1.36282	1.34179	1.39781	1.36747	2.07101	1.55353	2.28099	1.96851	1.13991	1.77508	1.45177	1.45559	0.276679	1
FBgn0002709	mei-218	X	17030018	0.74134	0.416573	0.436834	0.531582	1.04876	0.576822	0.817937	0.814506	0.828383	1.21899	0.629778	0.892384	0.742407	0.680435	0.490777	0.637873	0.766718	0.725352	0.746047	0.746039	0.848658	0.836657	0.376659	0.687325	0.436834	0.598029	0.93408	0.656314	0.631445	1.11147	0.50639	0.749768	0.618825	0.966306	0.788029	0.791053	0.731877	0.712716	0.79877	0.747788	0.666218	0.708777	0.759329	0.711441	0.435784	1
FBgn0002715	mei-S332	2R	18009606	1.58454	0.617819	1.09534	1.09923	1.01078	1.19903	1.75853	1.32278	0.63582	1.32229	0.455031	0.80438	0.512594	1.10579	0.751574	0.789986	0.433082	0.709993	1.36842	0.837165	0.367104	1.07468	1.14181	0.861198	1.09534	0.654815	1.13436	0.961505	0.936191	1.29421	0.783491	1.00463	0.480948	0.344384	0.714428	0.513253	0.953314	1.12783	1.18282	1.08799	1.00571	0.322168	1.09079	0.806223	0.154047	1
FBgn0002716	mei-W68	2R	15343700	0.956738	0.774514	2.00686	1.24604	0.929034	1.88776	1.59952	1.4721	1.48136	1.65377	2.14718	1.76077	1.45161	1.40409	1.67648	1.51073	1.89706	1.47223	2.03624	1.80184	1.18865	0.747816	0.494135	0.8102	2.00686	0.555792	1.89824	1.48696	0.850018	1.21913	1.20941	1.09285	0.772831	1.17251	0.9378	0.961047	1.64563	1.24917	2.01279	1.63586	1.25052	1.16675	1.05273	1.15667	0.926771	1
FBgn0002719	Men	3R	8538825	192.127	164.639	157.079	171.282	202.237	231.501	227.579	220.439	242.032	221.387	226.806	230.075	134.715	159.656	154.851	149.741	230.1	243.369	233.132	235.534	126.957	129.829	110.018	122.268	157.079	141.654	199.39	166.041	337.609	268.947	174.172	260.243	395.143	327.984	339.79	354.306	233.929	267.195	195.524	232.216	270.061	195.188	153.763	206.337	0.282045	1
FBgn0002723	Met	X	11510159	11.5911	13.313	10.9318	11.9453	13.527	12.5106	13.2073	13.0816	10.3117	13.0255	11.4222	11.5865	12.0629	11.2869	10.517	11.2889	10.5251	11.1764	9.93251	10.5447	15.1548	11.6032	12.9495	13.2358	10.9318	12.5952	10.3563	11.2944	9.5365	10.8617	10.8604	10.4195	7.30908	8.5145	7.3617	7.72843	11.8929	11.6398	11.4472	11.66	10.9954	10.0357	11.0213	10.6841	0.388214	1
FBgn0002732	E(spl)malpha-BFM	3R	21836615	0	0	0	0	0.424399	0	0	0.141466	0.400444	0	0.382109	0.260851	0	0	0	0	0	0	0.172368	0.057456	0	0	0	0	0	0.329926	0	0.109975	0	0	0.21931	0.0731033	0.403873	0	0	0.134624	0.240162	0.236772	0.496634	0.324523	0.506722	0	0	0.168907	1	1
FBgn0002733	E(spl)mbeta-HLH	3R	21830768	1.72449	3.22744	3.49676	2.81623	4.69356	2.08789	2.7219	3.16778	3.87505	2.30252	4.22586	3.46781	3.01247	1.92552	2.61745	2.51848	3.77065	2.22537	2.38284	2.79295	3.83545	4.49126	1.59059	3.30577	3.49676	3.4207	4.44435	3.78727	3.85319	4.34628	4.0929	4.09746	2.79159	2.84847	3.90984	3.1833	4.15003	3.76414	3.43277	3.78231	1.75125	1.86998	3.28077	2.30067	0.913377	1
FBgn0002734	E(spl)mdelta-HLH	3R	21823343	0	0	0	0	0	0	0	0	0.267226	0	0	0.0890753	0	0	0	0	0	0	0	0	0	0	0.383909	0.12797	0	0	0	0	0.143079	0	0	0.047693	0	0	0	0	0	0	0	0	0	0	0	0	1	1
FBgn0002735	E(spl)mgamma-HLH	3R	21825573	0	0	0	0	0	0	0	0	0	0	0	0	0	0	0	0	0	0	0.255809	0.0852697	0	0	0	0	0	0	0	0	0	0	0	0	0	0	0	0	0	0	0	0	0	0	0	0	1	1
FBgn0002736	mago	2R	17016084	10.6937	8.81553	5.91373	8.47432	9.6151	11.4058	10.2478	10.4229	9.56278	8.45031	8.42302	8.81204	8.99437	8.63542	10.8801	9.5033	8.49392	8.76172	9.39343	8.88302	9.62683	10.2782	7.74982	9.21828	5.91373	6.66666	11.1552	7.91186	11.4219	11.5507	12.4888	11.8205	10.1393	10.8904	10.7057	10.5785	10.8821	10.5835	10.3393	10.6016	11.0148	11.7616	11.3194	11.3653	0.256392	1
FBgn0002772	Mlc1	3R	23483285	127.081	110.424	109.766	115.757	128.639	115.396	117.637	120.557	91.4961	95.2271	90.974	92.5657	114.306	98.6425	111.015	107.988	78.8741	88.331	80.1473	82.4508	114.528	111.505	111.435	112.489	109.766	118.117	120.868	116.25	118.729	112.802	130.288	120.606	62.8911	78.1244	69.4118	70.1424	100.52	101.927	111.663	104.703	97.3416	79.7287	116.961	98.0104	0.00237678	0.157269
FBgn0002773	Mlc2	3R	25997160	217.053	202.022	181.423	200.166	228.034	213.187	227.221	222.814	126.587	149.871	157.063	144.507	227.802	202.495	214.614	214.97	141.359	147.576	136.043	141.659	169.832	153.076	172.164	165.024	181.423	193.371	195.495	190.096	148.49	161.426	191.77	167.229	73.3303	107.402	95.1166	91.9496	139.268	141.923	167.936	149.709	134.935	126.243	171.755	144.311	4.23141e-08	1.54319e-05
FBgn0002774	mle	2R	1862243	14.5748	13.7255	14.1863	14.1622	14.1621	15.4919	15.6647	15.1062	13.4983	16.0691	15.9472	15.1715	13.3394	12.9732	13.3717	13.2281	11.9238	12.9636	12.3681	12.4185	15.7041	13.1129	16.0839	14.967	14.1863	15.7407	15.8085	15.2452	14.8359	15.7092	14.9203	15.1551	9.21008	12.2986	13.5116	11.6734	17.0355	13.8235	17.8635	16.2408	14.132	13.4143	15.2563	14.2675	0.39274	1
FBgn0002775	msl-3	3L	7116310	5.30792	2.67042	4.73442	4.23759	4.22331	4.4916	4.39166	4.36886	5.35904	3.26593	4.72031	4.44843	3.65575	3.10674	4.39805	3.72018	3.85082	4.60324	2.95738	3.80381	3.17349	3.90192	6.90939	4.6616	4.73442	2.49069	3.67731	3.63414	3.75224	5.03462	5.41841	4.73509	2.77176	3.12594	3.088	2.99523	4.20295	3.81863	5.02735	4.34964	4.26006	4.27039	3.4289	3.98645	0.745458	1
FBgn0002778	mnd	3L	14978215	9.87162	8.52204	8.54204	8.97857	8.29344	12.4969	7.98282	9.59105	6.84473	8.73398	9.18803	8.25558	8.904	9.75863	8.75346	9.1387	8.54442	9.85748	10.4835	9.62847	8.96463	7.53647	8.67474	8.39195	8.54204	8.03685	7.93111	8.17	11.1634	11.0917	11.7639	11.3397	9.31238	9.8221	10.1409	9.75846	12.6536	9.37678	11.3721	11.1342	8.98177	7.96266	9.54668	8.83037	0.472831	1
FBgn0002780	mod	3R	27877794	47.7228	47.752	46.0349	47.1699	39.7171	42.9721	36.6163	39.7685	39.1225	35.7257	37.4622	37.4368	75.0328	68.0402	62.7084	68.5938	49.9565	51.3814	48.1564	49.8314	57.6989	69.9777	64.8824	64.1863	46.0349	66.6149	43.838	52.1626	55.1975	51.1733	40.3713	48.914	44.58	51.4513	57.2022	51.0778	68.6609	49.673	49.0308	55.7882	59.0593	60.5594	52.5803	57.3997	0.692441	1
FBgn0002781	mod(mdg4)	3R	17177331	54.0947	58.6755	57.0725	56.6142	63.5581	62.045	56.5525	60.7185	56.2194	63.4179	56.1818	58.6064	54.7438	49.9754	53.7302	52.8165	47.4631	50.1147	50.289	49.2889	67.47	64.4942	62.0364	64.6669	57.0725	59.3512	57.8407	58.0881	50.6775	50.6048	56.7254	52.6692	40.5289	43.5046	38.4016	40.8117	60.0189	47.2048	58.7458	55.3232	51.2683	45.2975	55.2601	50.6086	0.857243	1
FBgn0002783	mor	3R	11793856	10.7637	11.2204	11.0261	11.0034	11.8509	11.879	12.9483	12.2261	12.1322	13.3502	11.0189	12.1671	11.0451	9.89731	10.3246	10.4223	9.72075	11.1182	9.64337	10.1608	13.0664	12.7713	12.4251	12.7543	11.0261	10.4261	9.89973	10.4506	9.98498	10.2453	8.43784	9.55604	9.3333	8.44795	8.38741	8.72289	9.87296	9.00191	10.6824	9.85242	9.15216	8.08501	9.4502	8.89579	0.716871	1
FBgn0002787	Rpn8	2R	20290494	29.1902	27.771	25.196	27.3857	26.9948	30.5352	31.0813	29.5371	27.2999	25.8504	29.2147	27.455	27.8792	27.0637	27.3517	27.4315	25.4723	27.0549	29.9305	27.4859	43.3674	35.9501	37.1271	38.8149	25.196	35.5377	38.1453	32.9597	32.5516	33.1675	22.7065	29.4752	30.7324	29.9083	27.2175	29.2861	32.4476	28.0124	28.7072	29.7224	32.6695	31.4018	29.6921	31.2545	0.670521	1
FBgn0002789	Mp20	2R	9134175	123.181	105.035	99.3869	109.201	120.763	105.311	116.596	114.223	115.486	119.309	104.028	112.941	129.105	118.099	150.765	132.656	117.589	117.61	119.172	118.124	125.889	147.831	137.155	136.958	99.3869	148.687	155.765	134.613	105.53	114.447	115.871	111.949	79.6691	92.7434	73.7556	82.056	96.4122	98.1468	105.988	100.182	76.1858	77.8141	96.4443	83.4814	0.71888	1
FBgn0002791	mr	2R	19859956	4.22132	5.45206	3.89073	4.52137	4.26358	3.72668	3.25335	3.74787	4.23465	3.01942	3.63669	3.63025	3.28593	3.08398	4.31251	3.56081	2.59595	3.92478	3.55441	3.35838	4.40094	3.86508	5.77951	4.68184	3.89073	4.71006	3.30531	3.9687	4.0812	4.49453	5.50806	4.6946	3.1498	3.44047	2.71897	3.10308	5.33334	4.38171	4.79231	4.83579	4.82268	4.0768	4.22679	4.37542	0.42139	1
FBgn0002838	ms(3)K81	3R	22701574	0	0	0	0	0	0	0	0	0	0	0	0	0	0	0	0	0	0	0	0	0	0	0	0	0	0	0	0	0	0	0	0	0	0	0	0	0	0	0.236093	0.0786977	0	0	0	0	1	1
FBgn0002842	sa	3L	21398525	0.352834	0	0	0.117611	0	0.355989	0.348068	0.234686	0.283159	0.336501	0.270194	0.296618	0.228281	0	0.205975	0.144752	0.110212	0.37943	0.365651	0.285098	0	0	0.406799	0.1356	0	0.233295	0	0.077765	0.303221	0	0	0.101074	0	0	0.18181	0.0606033	0.339643	0.167424	0.175588	0.227552	0.35831	0.573904	0.176646	0.36962	1	1
FBgn0002855	Acp26Aa	2L	5892883	0	0	0	0	0	0	0	0	0	0	0	0	0	0	0	0	0	0	0	0	0	0	0	0	0	0	0	0	0	0	0	0	0	0	0	0	0	0	0	0	0	0	0	0	1	1
FBgn0002856	Acp26Ab	2L	5892298	0	0	0	0	0	0	0	0	0	0	0	0	0	0	0	0	0	0	0	0	0	0	0	0	0	0	0	0	0	0	0	0	0	0	0	0	0	0	0	0	0	0	0	0	1	1
FBgn0002862	Mst87F	3R	9652873	0	0	0	0	0.610413	0	0.707984	0.439466	0	0	0	0	0	0.25042	0	0.0834733	0.224176	0	0	0.0747253	0	0	0	0	0	0.949064	0	0.316355	0	0	0	0	0	0	0.739618	0.246539	0	0	0.357154	0.119051	0	0.389115	0	0.129705	0.505205	1
FBgn0002863	Acp95EF	3R	20054697	4.16432	4.32982	3.83819	4.11078	2.36127	2.80103	6.84676	4.00302	2.22798	0	4.25195	2.15998	3.14333	1.45306	3.24136	2.61258	0.867183	0.995158	1.91804	1.26013	0	1.50633	1.60041	1.03558	3.83819	2.75346	4.96865	3.85343	1.19292	1.29573	1.2202	1.23628	2.24706	1.81014	1.43054	1.82925	1.33621	3.95204	2.07237	2.45354	0.704823	0.752609	3.47476	1.64406	0.180412	1
FBgn0002865	Mst98Ca	3R	24117060	0	0	0	0	0	0	0	0	0	0	0	0	0	0	0	0	0	0	0	0	0	0	0	0	0	0	0	0	0	0	0	0	0	0	0	0	0	0	0	0	0	0	0	0	1	1
FBgn0002868	MtnA	3R	5609487	733.624	665.643	742.337	713.868	1241.26	1257.12	1340.71	1279.7	1251.69	936.947	843.448	1010.7	1073.37	1068.2	1033.93	1058.5	796.211	708.902	868.301	791.138	575.966	514.373	475.07	521.803	742.337	568.304	619.531	643.391	3023.44	2294.01	1746.2	2354.55	524.545	530.06	389.679	481.428	1908.91	1124.6	710.601	1248.04	970.208	671.285	433.262	691.585	0.0201616	0.64263
FBgn0002869	MtnB	3R	16328960	1.12063	0.873875	1.03287	1.00913	0.953136	1.13065	0	0.694595	2.69801	0	1.71632	1.47144	0.36252	3.12818	0.654194	1.38163	0	0.8034	1.93556	0.912987	0	1.21607	0	0.405357	1.03287	0.740963	1.60449	1.12611	2.88916	1.04606	0.492538	1.47592	0.453518	0.487114	0	0.313544	2.69683	0.531753	0	1.07619	0	1.21518	0	0.40506	0.695879	1
FBgn0002872	mu2	3L	1942734	1.64564	1.3625	0.996886	1.33501	1.25434	0.839416	1.14906	1.08094	1.1351	1.74569	1.33799	1.40626	1.50729	1.17481	1.24386	1.30865	1.16952	1.38634	0.373626	0.976495	0.759264	1.62516	1.63073	1.33838	0.996886	1.13764	1.19125	1.10859	1.14404	1.32034	1.15235	1.20558	0.765899	0.894175	0.80566	0.821911	1.54459	0.898107	1.20076	1.21449	0.929415	1.07071	1.68176	1.2273	0.584199	1
FBgn0002873	mud	X	14141765	0.0541308	0.222375	0.149781	0.142096	0	0.109289	0.0533995	0.0542295	0.130417	0.103306	0.181986	0.13857	0.109441	0.0377963	0.0992559	0.0821644	0.152316	0.0681478	0.0374184	0.0859607	0.100327	0.117546	0.0547949	0.0908893	0.149781	0.12914	0.0775454	0.118822	0.0698282	0.0758463	0.0237915	0.0564887	0	0.0619774	0.0837374	0.0485716	0.0915042	0.0513993	0.134804	0.0925692	0.241889	0.0881089	0.108487	0.146162	0.156974	1
FBgn0002878	mus101	X	13616279	0.762203	0.972608	0.702512	0.812441	0.707216	1.25839	0.751906	0.905837	0.778513	0.991253	0.79593	0.855232	1.32251	0.870401	0.626981	0.939964	0.562743	0.968685	0.526594	0.686007	0.385278	0.902311	0.559224	0.615604	0.702512	1.14539	0.694468	0.847457	1.04209	0.582123	0.730915	0.785043	0.757137	0.933702	0.892616	0.861152	0.767057	0.789109	0.86207	0.806079	0.809214	0.488392	0.901954	0.733187	1	1
FBgn0002887	mus201	2L	8437411	3.78517	2.9462	4.1301	3.62049	2.83976	3.01405	3.20704	3.02028	2.67949	2.59768	3.29694	2.85804	2.33072	3.26004	2.97497	2.85524	3.20087	3.05507	2.42814	2.89469	3.4342	2.0976	3.03907	2.85696	4.1301	3.13715	2.1386	3.13528	2.5709	2.91159	2.74186	2.74145	2.1335	2.32974	2.87636	2.44653	3.76703	2.17183	3.54858	3.16248	2.54298	2.85829	2.81527	2.73885	0.5164	1
FBgn0002891	mus205	2R	3680757	0.805035	0.775483	0.960221	0.846913	0.724988	0.716676	0.747444	0.729703	0.950092	1.30972	1.16044	1.14008	0.781278	0.793133	0.691115	0.755175	0.843139	0.831767	0.948787	0.874564	0.614382	0.822209	1.03736	0.82465	0.960221	1.31507	0.881425	1.05224	0.712183	0.751464	1.12392	0.862522	0.728252	0.699863	0.683235	0.703783	0.957275	0.85388	0.919083	0.910079	0.504943	1.00133	0.758663	0.754979	0.00094944	0.079621
FBgn0002899	mus301	3L	8130908	0.10027	0.156383	0.462089	0.239581	0.255851	0.303501	0.494579	0.35131	0.241409	0.0956286	0.307141	0.214726	0.68118	0.699748	0.643887	0.674938	0.250565	0.395371	0.935215	0.52705	0.557531	0.652861	0.578032	0.596141	0.462089	0.331495	0.430695	0.408093	0.646282	0.561588	0.352566	0.520145	0.568111	1.00246	0.568345	0.712972	0.241304	0.523375	0.299398	0.354692	0.407306	0.271825	0.502002	0.393711	0.40501	1
FBgn0002901	mus304	3L	18102897	1.07805	1.58793	0.44161	1.03586	0.71316	1.08769	1.41798	1.07294	1.6342	0.799667	1.28419	1.23935	0.774989	0.710532	0.594374	0.693298	0.598652	0.858748	0.579294	0.678898	0.888037	0.909894	0.690518	0.829483	0.44161	1.02961	0.514509	0.66191	0.977929	0.447249	0.68441	0.703196	0.533238	0.781009	0.802391	0.705546	0.922439	0.966257	0.953763	0.947486	1.09478	0.84428	0.659662	0.866241	0.632898	1
FBgn0002905	mus308	3R	8531245	1.05081	0.5736	0.968515	0.864308	2.05563	1.96138	2.38421	2.13374	2.06609	2.05444	2.3336	2.15138	1.44472	1.74163	1.47224	1.55286	1.90375	2.05286	2.17796	2.04486	0.389519	0.912242	0.787492	0.696418	0.968515	0.833757	1.31646	1.03958	2.21247	1.64298	1.70884	1.85476	2.5941	2.83194	2.89684	2.77429	1.13796	0.69807	0.915137	0.917056	0.693625	1.16795	0.683912	0.848496	0.750244	1
FBgn0002906	Blm	3R	7562053	1.65942	1.49311	1.64712	1.59988	1.24854	2.06063	1.13331	1.48083	1.38295	1.33913	1.36851	1.36353	1.56916	1.38075	1.34131	1.43041	1.1563	1.34982	1.19056	1.23223	1.18293	1.31593	1.25096	1.24994	1.64712	1.68802	1.59918	1.64477	1.15184	1.22133	1.29038	1.22118	0.800715	1.22069	1.0524	1.0246	1.53594	1.39312	1.61986	1.51631	1.03703	1.31496	1.50181	1.2846	0.632698	1
FBgn0002909	mus312	3L	7322232	4.2114	2.13264	3.41592	3.25332	1.6327	3.99863	0.261226	1.96419	4.07947	0.708984	2.07723	2.28856	3.88992	1.28572	3.16932	2.78165	1.02577	1.20134	3.29786	1.84166	1.83653	4.62132	0.000444348	2.15276	3.41592	2.67841	3.54984	3.21472	2.15131	2.96344	1.16373	2.09283	1.25188	1.38734	2.55705	1.73209	2.96985	2.85635	2.24922	2.69181	3.87452	1.20643	1.92529	2.33541	0.384221	1
FBgn0002914	Myb	X	15748865	16.5022	18.008	18.4793	17.6632	23.1421	18.7147	18.4529	20.1032	16.6672	18.8188	18.8607	18.1156	16.3636	15.0087	18.3405	16.5709	16.9346	15.7001	14.5974	15.744	17.4815	18.8433	17.9464	18.0904	18.4793	17.3811	15.6617	17.174	16.8984	16.9847	19.038	17.6404	13.1298	13.3685	12.8553	13.1179	16.896	13.1577	18.5233	16.1923	17.2302	16.1276	15.3433	16.2337	0.466488	1
FBgn0002917	na	X	14160400	7.17604	9.06667	9.21013	8.48428	11.0184	11.9962	9.14697	10.7205	9.18898	11.3818	10.9559	10.5089	8.59145	8.21106	8.69172	8.49808	9.66713	9.07199	9.60574	9.44829	10.8978	9.59547	10.3469	10.2801	9.21013	10.7951	11.3165	10.4406	9.19115	9.28048	10.803	9.75821	8.05173	8.07848	8.37	8.16674	11.9877	9.15971	12.32	11.1558	9.43876	7.61496	9.96435	9.00602	0.795662	1
FBgn0002921	Atpalpha	3R	16774436	407.864	458.699	454.398	440.32	532.016	540.987	482.987	518.663	453.305	533.802	504.086	497.064	546.004	496.414	512.509	518.309	502.723	496.441	534.531	511.232	522.566	447.711	475.8	482.026	454.398	487.337	469.583	470.439	370.91	408.071	378.062	385.681	278.298	331.577	326.713	312.196	413.406	344.195	440.099	399.233	328.024	324.226	397.641	349.964	0.974119	1
FBgn0002922	nau	3R	19538536	0.221668	0.865082	0.408861	0.498537	0.188536	0.223649	0.218673	0.210286	0	0.211406	0.339703	0.183703	0.0717087	0	0.518128	0.196612	0.138565	0.238561	0	0.125709	0	0.240546	0.255571	0.165372	0.408861	0.293311	0.157622	0.286598	0.28597	0.414192	0.097427	0.265863	0.0897087	0.289288	0.228581	0.202526	0.105972	0.313429	0.772942	0.397448	0.225243	0	0.110978	0.112074	1	1
FBgn0002924	ncd	3R	25630009	0.371623	0.289794	0.685039	0.448819	0.526797	0.874873	0.611004	0.670891	0.39765	0.354419	0.474304	0.408791	0.400729	0.389011	0.470044	0.419928	0.42563	0.0888077	0.599079	0.371172	0.688775	0.537697	0.714102	0.646858	0.685039	0.573342	0.798123	0.685501	0.479051	0.925049	0.598895	0.667665	0.501318	0.376919	0.255322	0.377853	0.894322	0.646579	0.863045	0.801315	0.440288	0.402976	0.49614	0.446468	0.306179	1
FBgn0002926	ndl	3L	6587038	0	0	0	0	0.0348595	0	0.0404317	0.0250971	0	0	0	0	0	0.014301	0	0.004767	0	0	0.0141581	0.00471937	0	0	0	0	0	0	0.029341	0.00978033	0	0	0	0	0	0	0.0211191	0.0070397	0.0197265	0	0	0.0065755	0.0208107	0.0222216	0	0.0143441	0.505164	1
FBgn0002930	nec	2R	3043981	125.685	100.606	101.266	109.186	100.174	101.405	98.9431	100.174	101.867	93.6705	96.5659	97.3678	80.9133	76.6015	93.7794	83.7647	87.6182	91.7467	91.2902	90.2184	132.286	130.518	118.997	127.267	101.266	105.667	110.236	105.723	113.823	91.9728	84.7818	96.8592	126.403	103.657	101.756	110.605	105.963	114.933	100.448	107.115	123.726	108.76	101.887	111.458	1	1
FBgn0002931	net	2L	82421	3.06117	4.43141	3.58486	3.69248	4.63416	4.59938	4.85339	4.69564	1.14013	2.76264	2.46052	2.1211	3.61113	3.27571	3.45467	3.44717	1.7337	2.19867	1.21135	1.71457	3.83229	3.78377	1.40397	3.00668	3.58486	3.53521	4.64936	3.92314	1.76519	1.7208	2.40819	1.96473	1.42674	1.45294	1.48431	1.45466	3.50859	2.25935	2.41807	2.72867	3.03387	4.39252	5.87318	4.43319	0.000587442	0.056517
FBgn0002932	neur	3R	4846068	3.18928	2.58486	1.66143	2.47852	2.29864	2.90338	2.83762	2.67988	2.36686	3.60393	2.35735	2.77605	3.22308	2.36226	2.15575	2.58036	2.10817	2.62255	1.90978	2.2135	1.09724	1.95099	1.87359	1.64061	1.66143	2.23617	1.42029	1.77263	2.46478	3.03408	2.16634	2.55507	0.911733	2.0021	1.92592	1.61325	2.93906	2.21554	2.3923	2.51563	1.77255	2.15589	2.39763	2.10869	0.96213	1
FBgn0002933	ng1	X	3136445	0	0.502938	0	0.167646	0.274277	0.325359	0	0.199879	0.776387	1.23019	0.740839	0.915805	0.20864	0.562608	0.564759	0.445336	0	0.231189	0.222793	0.151327	0.597684	0	0	0.199228	0	0.213222	0.461714	0.224979	0	0	0.283468	0.0944893	0	0	0	0	0	0	0.32096	0.106987	0.32748	0	0	0.10916	0.188779	1
FBgn0002936	ninaA	2L	877302	28.6578	36.8432	33.9092	33.1367	40.1849	39.8544	36.2933	38.7775	29.2145	34.7179	33.215	32.3825	30.0671	24.4584	29.9551	28.1602	35.2016	31.7897	29.9663	32.3192	28.7108	29.4175	26.3434	28.1572	33.9092	25.8623	37.4275	32.3997	61.0709	45.0063	59.9143	55.3305	73.3481	65.483	54.0787	64.3033	61.5101	55.1289	62.057	59.5653	63.1209	53.7523	60.6859	59.1864	0.19349	1
FBgn0002937	ninaB	3R	9526308	20.8711	23.1612	23.2319	22.4214	30.8606	35.6362	30.2502	32.249	31.8243	37.3601	32.8261	34.0035	28.1496	25.7691	23.2902	25.7363	28.1837	31.5372	28.7281	29.483	27.6733	17.9447	16.8443	20.8208	23.2319	18.577	21.0329	20.9473	27.1804	28.624	27.6609	27.8218	32.2268	30.4269	32.5946	31.7494	25.9635	24.0734	27.4844	25.8404	24.5373	21.6745	24.5152	23.5757	0.3297	1
FBgn0002938	ninaC	2L	7377718	317.059	338.96	347.275	334.431	382.206	337.959	322.224	347.463	287.265	354.732	347.019	329.672	302.868	255.241	325.324	294.478	323.85	320.217	282.993	309.02	329.314	317.019	325.395	323.909	347.275	365.001	337.026	349.767	388.731	417.256	445.718	417.235	294.579	302.25	295.167	297.332	403.179	395.841	418.775	405.932	329.632	327.839	384.011	347.161	0.884852	1
FBgn0002939	ninaD	2L	18081630	2.26551	2.03544	2.80857	2.36984	1.71279	2.5678	1.73825	2.00628	3.13865	2.16063	2.36593	2.55507	1.48392	1.26098	1.21062	1.31851	0.815128	1.92088	1.2368	1.32427	0.933091	0.81948	0.290218	0.68093	2.80857	0.129293	1.08123	1.3397	1.5126	1.00424	2.25202	1.58962	0.870494	1.46182	1.8778	1.40337	1.2235	1.84454	0.973179	1.34707	1.91722	1.37203	0.78319	1.35748	0.159578	1
FBgn0002940	ninaE	3R	15711968	6834.06	7338.34	8030.86	7401.09	8835.33	7659.99	7484.96	7993.43	6378.83	8674.67	8602.38	7885.29	6067.25	4950.59	7047.85	6021.9	7075.54	7286.5	6206.39	6856.14	7965.24	7367.96	7881.01	7738.07	8030.86	7450.35	7466.11	7649.11	9115.57	8440.79	9742.7	9099.69	8728.45	7590.16	6900.27	7739.63	8105.06	7706.22	8126.45	7979.24	7452.85	6715.86	7736.09	7301.6	0.748063	1
FBgn0002941	slou	3R	17374377	0.364528	0.473769	0.783953	0.54075	0.620088	1.10336	1.19868	0.974043	0.682601	1.04296	0.558298	0.761286	0.628925	0.508779	0.709339	0.615681	0.417504	0.696898	0.797513	0.637305	0.675624	0.791147	1.12075	0.862507	0.783953	0.803422	0.347949	0.645108	0.469904	0.623829	0.534056	0.542596	0.491747	0.528175	0.500894	0.506939	1.11118	0.634234	0.604691	0.783368	0.616974	0.263522	0.669168	0.516555	0.566902	1
FBgn0002945	nkd	3L	18996841	5.81686	5.4065	4.24742	5.15693	5.09901	4.98118	6.34676	5.47565	4.66505	5.02668	5.14974	4.94716	5.99207	6.65389	5.49295	6.0463	5.03556	5.88317	5.67801	5.53225	4.86207	5.02861	4.83181	4.9075	4.24742	3.72358	5.12049	4.36383	5.37028	3.98427	4.68833	4.68096	3.42409	3.67615	3.23117	3.4438	4.02063	4.01172	4.68233	4.23823	4.18553	3.86581	4.08817	4.0465	0.562323	1
FBgn0002948	nod	X	11474851	0.840821	0.764958	0.968717	0.858165	1.19191	1.0074	0.984987	1.06143	1.25116	0.551305	0.96583	0.922765	0.736675	0.672348	0.639127	0.682717	0.793394	0.872805	0.683779	0.783326	1.33113	0.152072	1.13099	0.871397	0.968717	0.648612	0.501613	0.706314	0.918291	0.989263	0.639025	0.84886	1.02084	0.982247	0.740156	0.914414	1.09604	0.274299	0.697392	0.689244	0.524774	0.693318	1.36811	0.862067	0.574851	1
FBgn0002962	nos	3R	14982962	0	0	0	0	0	0	0	0	0	0	0	0	0	0	0	0	0	0	0	0	0	0	0	0	0	0	0	0	0	0	0.0631674	0.0210558	0	0	0	0	0	0.0681967	0	0.0227322	0.291899	0	0	0.0972997	1	1
FBgn0002968		X	8411408	36.174	31.9902	33.5072	33.8905	35.6988	37.6991	33.6089	35.6689	33.1273	36.1456	33.8537	34.3755	30.8862	31.2601	30.9178	31.0214	29.7291	28.6363	31.4085	29.9246	37.1375	33.5415	35.1225	35.2672	33.5072	34.5442	33.5409	33.8641	28.451	29.3789	29.1679	28.9993	21.1812	22.6547	22.5856	22.1405	30.5546	27.8336	31.2884	29.8922	25.0248	27.8115	30.3816	27.7393	0.652113	1
FBgn0002973	numb	2L	9437469	11.4723	12.0457	12.4028	11.9736	15.3037	16.3615	12.958	14.8744	11.1016	15.1692	15.3002	13.857	13.5455	12.0054	15.074	13.5416	12.0857	11.7727	14.3201	12.7262	12.8849	8.83348	13.3099	11.6761	12.4028	13.8051	11.6183	12.6087	10.3953	11.6812	12.8403	11.6389	8.99195	10.2059	9.80127	9.66637	12.268	11.4952	13.2198	12.3277	11.0571	11.4432	11.0776	11.1926	0.885307	1
FBgn0002985	odd	2L	3604222	0.720439	0.561803	0.796822	0.693021	1.71573	0.145376	0.710706	0.857271	0.346903	0.824505	0.88272	0.684709	0.0466119	0.502766	0.714975	0.421451	0.360061	0.464847	0.24887	0.357926	0.801168	0	0.332251	0.377806	0.796822	0.381085	0.515755	0.564554	0.247654	0.537998	1.32991	0.705187	0.408186	0.31316	0.222738	0.314695	0.554803	0.341857	0.788759	0.561806	0.0731619	0.390611	0.504962	0.322912	1	1
FBgn0002989	okr	2L	2989594	2.10965	1.91931	1.83641	1.95512	1.49528	1.89201	1.50305	1.63011	1.97523	1.11777	2.78231	1.95844	2.16114	1.73638	1.74471	1.88074	1.75727	1.47043	2.18628	1.80466	1.30336	1.27185	2.02693	1.53405	1.83641	1.70488	1.42637	1.65589	2.21589	2.13337	1.81743	2.05556	1.56525	1.89895	1.75139	1.73853	2.42565	2.05772	2.33304	2.27214	1.60679	2.03346	2.17106	1.9371	0.279223	1
FBgn0003002	opa	3R	678535	0.457834	0.981812	0.42198	0.620542	0.584107	0.923856	0.338737	0.615567	0.367425	0.98244	0.350602	0.566822	0.888647	0.798762	0.668179	0.785196	0.572041	0.738518	0.31631	0.54229	0.848562	0.745241	1.05572	0.883174	0.42198	0.681123	0.737458	0.61352	0.639366	0.694473	0.905521	0.746453	0.370571	0.796044	0.707744	0.624786	0.936525	0.706056	1.13921	0.927264	0.813644	0.744692	0.744946	0.767761	1	1
FBgn0003008	or	2R	19855465	7.40436	9.3025	10.995	9.23395	10.1462	8.30062	12.9855	10.4774	11.8844	12.5539	11.3403	11.9262	11.178	9.61675	9.36535	10.0534	11.0502	12.0912	13.6415	12.261	7.62412	12.4988	10.9082	10.3437	10.995	6.52771	7.0676	8.19677	13.9637	12.0954	13.0174	13.0255	11.1538	15.9138	11.658	12.9085	10.2953	11.7115	10.0308	10.6792	11.2789	8.47511	11.1209	10.2916	0.369748	1
FBgn0003009	ord	2R	19158778	0	0	0	0	0	0	0	0	0	0	0	0	0	0	0	0	0	0	0	0	0	0	0	0	0	0	0	0	0	0	0	0	0	0	0	0	0	0	0	0	0	0	0	0	1	1
FBgn0003011	ort	3R	15485470	2.02542	2.91588	4.30799	3.0831	3.97544	2.8295	3.22762	3.34419	3.75104	3.41754	5.01101	4.05986	4.58651	3.42492	3.77453	3.92865	3.16332	4.07693	4.03652	3.75892	4.62025	2.53606	3.41298	3.5231	4.30799	2.88445	2.4538	3.21541	3.81596	4.14486	6.64232	4.86771	2.83737	3.38617	2.40846	2.87733	4.4243	3.03111	4.18686	3.88076	4.43013	3.71681	3.35407	3.83367	0.261182	1
FBgn0003015	osk	3R	4760853	0	0	0	0	0	0.356486	0	0.118829	0	0	0	0	0.1143	0.164382	0.171886	0.150189	0.0367887	0	0.0813693	0.039386	0	0	0	0	0	0.155747	0	0.0519157	0	0.0549692	0.207058	0.0873424	0	0	0	0	0	0.502974	0.117222	0.206732	1.07643	0	0	0.35881	0.269144	1
FBgn0003016	osp	2L	14599776	9.93624	10.4998	9.72448	10.0535	12.9768	11.0286	10.0485	11.3513	9.57246	11.9011	10.4708	10.6481	10.0465	10.1166	11.2151	10.4594	10.6035	9.83577	9.72189	10.0537	10.109	11.1598	8.86101	10.0433	9.72448	9.02786	10.0199	9.59075	9.48348	10.1395	7.92352	9.18217	7.25884	7.36154	8.18992	7.60343	9.9112	8.93026	9.5432	9.46155	7.72108	7.31025	8.4903	7.84054	0.707506	1
FBgn0003022	Ote	2R	14163112	0	0.662978	0.5877	0.416893	0.361555	0.643337	0.629022	0.544638	0.852868	0.405412	0.813818	0.690699	0.825093	0.370818	1.05467	0.750194	0.132782	0.380944	0.440532	0.318086	0.787874	0.461295	0.980214	0.743128	0.5877	0.421607	0	0.336436	0.182658	0.793607	0.653924	0.543396	0.602119	0	0.547606	0.383242	0.1023	0.403422	0.846187	0.450636	0.431687	0.576194	0.212821	0.406901	0.661906	1
FBgn0003023	otu	X	8379026	0.11221	0	0.0961735	0.0694612	0.190873	0	0	0.0636243	0	0	0.0859178	0.0286393	0.0362909	0	0	0.012097	0.0350424	0	0.0775255	0.0375226	0	0	0	0	0.0961735	0.14838	0	0.0815178	0.0482167	0.0523612	0.0493103	0.0499627	0	0.0487762	0	0.0162587	0	0.053246	0	0.0177487	0.106013	0	0	0.0353377	1	1
FBgn0003028	ovo	X	4942330	2.9031	2.65425	1.89148	2.48294	3.27807	3.01231	2.22197	2.83745	2.97253	2.91192	2.72144	2.86863	2.7532	2.38552	2.65808	2.59893	2.87166	1.94443	3.09501	2.63703	3.95121	2.75855	2.30869	3.00615	1.89148	2.38287	2.83422	2.36952	2.14995	2.26605	2.19994	2.20531	1.34039	1.81366	2.11492	1.75632	2.20926	1.75757	2.44109	2.13597	1.75364	2.38816	2.30545	2.14908	0.658638	1
FBgn0003034	Acp70A	3L	13294735	0	0	0	0	0	0	0	0	0	0	0	0	0	0	0	0	0	0	0	0	0	0	0	0	0	0	0	0	0	0	0	0	0	0	0	0	0	0	0	0	0	0	0	0	1	1
FBgn0003041	pbl	3L	7889209	1.779	2.08385	2.20305	2.02197	2.23677	2.28929	2.95753	2.49453	2.41751	2.38753	2.77359	2.52621	2.88123	1.62764	2.11181	2.20689	2.28658	2.20986	2.93775	2.47806	2.07492	1.87106	2.2706	2.07219	2.20305	2.01873	2.47167	2.23115	2.50867	2.05025	2.54918	2.36937	1.37824	2.64007	1.94744	1.98858	1.96387	2.04728	2.57425	2.19513	1.97424	2.1524	2.36862	2.16509	0.887084	1
FBgn0003042	Pc	3L	21299238	6.02828	5.76928	9.84959	7.21572	6.8752	9.39973	6.62262	7.63252	7.25679	9.01581	6.29502	7.52254	7.22434	6.93182	5.91857	6.69158	6.24816	6.82646	6.57855	6.55106	5.58648	6.24434	4.10699	5.3126	9.84959	7.70006	6.57145	8.04037	7.06447	7.28969	7.8884	7.41419	5.48919	5.65761	5.85956	5.66879	5.67102	5.85101	6.74994	6.09066	6.88705	5.79405	6.72202	6.46771	0.831071	1
FBgn0003044	Pcl	2R	14022919	3.96221	4.2667	3.96201	4.06364	6.65686	6.12429	4.43834	5.73983	4.61855	4.68418	4.43101	4.57791	4.24594	4.78957	4.42055	4.48535	4.35027	4.54371	3.99937	4.29778	3.73676	4.31132	3.89487	3.98098	3.96201	4.71474	4.12217	4.26631	3.95655	4.20258	5.15147	4.43687	3.74234	3.43555	3.16309	3.44699	4.35438	3.59792	4.16222	4.03817	3.15611	3.89587	4.34023	3.7974	0.194487	1
FBgn0003046	Pcp	2L	7021682	0.467836	0.364822	0.431198	0.421285	0.397911	0	0	0.132637	0.375451	0	0.716521	0.363991	0.302687	1.1427	1.09244	0.845942	0.584537	0.5031	0.32322	0.470286	0.867098	0.50768	1.61817	0.997649	0.431198	0	0.669838	0.367012	1.20615	1.96517	0.411245	1.19419	0.378666	0.813433	0.723205	0.638435	0.225172	0.887975	0.698456	0.603868	1.90038	0	0.468443	0.789608	1	1
FBgn0003048	pcx	X	2119329	4.79203	4.80143	4.33971	4.64439	4.95256	4.97543	4.80971	4.91257	4.36	4.94219	4.97108	4.75776	4.82186	4.76349	5.18019	4.92185	5.24242	5.44708	5.0816	5.25703	5.06041	4.74665	5.55708	5.12138	4.33971	4.71591	6.10321	5.05294	4.76467	5.34436	5.36344	5.15749	4.26624	5.23171	5.32138	4.93978	6.02088	4.58742	5.28252	5.29694	4.6825	4.90932	4.99353	4.86178	1	1
FBgn0003053	peb	X	4511602	3.39766	2.36236	3.37247	3.04416	4.134	3.58526	3.66023	3.79316	3.6887	2.54147	3.2023	3.14416	3.29638	3.35447	3.50706	3.38597	2.95363	3.87665	3.05044	3.29357	4.26016	3.17529	3.49367	3.64304	3.37247	5.1139	2.84288	3.77642	2.44633	2.82839	3.05384	2.77619	2.00904	2.65808	2.20821	2.29178	2.61449	3.02526	3.22313	2.95429	2.09633	2.15224	2.56464	2.27107	0.208236	1
FBgn0003057	CG10598	X	17119744	0	0	0	0	0	0	0	0	0	0	0	0	0	0	0	0	0	0	0	0	0	0	0	0	0	0	0	0	0	0	0	0	0	0	0	0	0	0	0	0	0	0	0	0	1	1
FBgn0003060	CG9757	3R	9437588	1.7942	2.79826	1.65369	2.08205	3.05206	3.62048	1.76996	2.81417	0.479965	1.14076	0.457989	0.692905	0.193473	1.66947	0.698271	0.853738	0.373627	0.643148	0.206597	0.407791	1.10847	1.298	4.82677	2.41108	1.65369	2.37266	4.70965	2.912	0.770954	1.11654	0.262861	0.716785	0.242037	0	0	0.080679	0.86356	0.28379	3.27391	1.47375	2.12572	0.972787	3.29363	2.13071	0.0378112	0.886331
FBgn0003062	Fib	2R	18960420	13.2378	14.4918	12.905	13.5449	10.3931	10.7877	11.8033	10.9947	11.0323	10.6827	9.55244	10.4225	23.5531	16.6109	18.3537	19.5059	13.9158	13.8706	10.9046	12.897	22.6479	24.8629	23.4808	23.6639	12.905	20.3673	16.2199	16.4974	15.6425	14.258	11.189	13.6965	23.2838	11.8404	14.2983	16.4742	21.8099	14.7374	12.6689	16.4054	14.2188	14.3547	11.9805	13.518	0.912613	1
FBgn0003065	CG2150	3R	27589026	0	0.451952	0	0.150651	0.246472	0	0	0.0821573	0	0.55274	0	0.184247	0.187489	0	0	0.0624963	0	0	0	0	0.537094	0	0	0.179031	0	0.191606	0	0.0638687	0	0	0	0	0.117276	0	0	0.039092	0	0.137507	0	0.0458357	0	0	0	0	1	1
FBgn0003067	Pepck	2R	14424272	629.616	575.439	524.848	576.634	567.359	581.206	577.852	575.472	958.366	809.264	813.439	860.356	360.036	255.632	294.148	303.272	881.38	809.265	839.959	843.535	349.135	339.386	319.594	336.038	524.848	338.732	390.204	417.928	384.747	592.065	442.268	473.027	1041.67	921.665	1098.16	1020.5	434.503	686.022	608.03	576.185	602.594	671.651	587.223	620.489	7.96706e-11	4.99758e-08
FBgn0003068	per	X	2579613	9.05012	9.06428	10.6205	9.5783	10.9346	12.3481	10.5846	11.2891	8.05477	8.3853	10.3909	8.94366	9.29538	7.62146	8.40522	8.44069	9.21665	9.41673	8.92297	9.18545	11.0341	13.8079	12.2847	12.3756	10.6205	10.4225	11.1681	10.737	14.8226	13.416	14.8063	14.3483	12.397	9.90652	12.8354	11.713	16.0305	15.8748	16.2097	16.0383	13.7777	14.2173	14.3146	14.1032	0.0367265	0.877964
FBgn0003071	Pfk	2R	5997245	35.9978	38.1352	35.7905	36.6412	38.5519	44.2284	34.9492	39.2432	34.7754	36.7041	36.4353	35.9716	33.8933	32.5598	33.2775	33.2435	30.5914	32.9878	31.5513	31.7102	33.3992	36.0752	34.1332	34.5359	35.7905	32.8107	36.2653	34.9555	37.254	38.4806	34.9797	36.9048	41.183	37.3321	35.8962	38.1371	35.7924	35.9515	36.8961	36.2133	36.436	35.3244	34.5491	35.4365	0.459413	1
FBgn0003074	Pgi	2R	4798407	154.813	151.947	139.443	148.734	167.573	176.257	162.343	168.724	165.219	142.108	141.837	149.721	130.725	161.041	143.692	145.153	127.482	132.354	134.219	131.352	134.979	132.443	131.288	132.903	139.443	135.237	161.688	145.456	190.253	147.441	105.291	147.662	208.753	184.224	177.335	190.104	145.945	147.327	107.592	133.621	180.604	179.728	162.015	174.116	0.301358	1
FBgn0003076	Pgm	3L	16119155	131.776	153.141	132.589	139.169	130.76	140.71	129.815	133.762	112.363	91.9875	99.37	101.24	121.789	141.007	130.028	130.941	106.106	110.415	98.5654	105.029	138.74	146.375	125.343	136.819	132.589	149.211	150.808	144.203	157.365	129.243	87.3596	124.656	191.098	149.326	143.254	161.226	142.529	152.328	102.102	132.32	184.747	170.182	152.838	169.256	0.00119272	0.0935212
FBgn0003079	phl	X	2234159	6.11675	6.07776	6.02548	6.07333	7.15124	7.26637	7.51203	7.30988	6.65071	6.11586	5.51515	6.09391	5.90433	5.43908	6.0894	5.81094	5.17723	5.3047	5.8959	5.45928	7.49697	4.92472	7.05228	6.49132	6.02548	6.04208	6.49775	6.18844	7.03717	6.12414	6.93788	6.69973	5.82928	4.81405	4.22543	4.95625	6.60033	6.17947	7.26879	6.68286	6.92116	6.35392	6.12469	6.46659	0.167736	1
FBgn0003082	phr	2R	3712997	0.0984657	0.302865	0.363136	0.254822	4.18946	4.07516	5.5393	4.60131	4.66443	5.26136	4.37525	4.76701	3.76048	3.50614	3.40422	3.55695	3.27576	5.01441	4.01558	4.10192	0	0.427543	0.227035	0.218193	0.363136	0.0650644	0	0.142733	5.33362	5.5634	6.40815	5.76839	5.94033	5.9522	5.02542	5.63932	1.51725	1.58931	0.784351	1.29697	1.38043	1.17507	0.837876	1.13113	0.43946	1
FBgn0003086	Pig1	X	3142628	1.46656	0	0.45057	0.639043	0	0.986451	0.964501	0.650317	0	0.932448	0.748713	0.560387	0.632571	1.02346	0.570761	0.742264	0.610799	1.22664	0	0.61248	0.906055	0	0	0.302018	0.45057	0.646464	0.699932	0.598989	0.630171	0.228162	0.644582	0.500972	0.197839	0.637484	0.755696	0.53034	0.470578	0.463935	0.729836	0.554783	0.24822	0.530098	1.71321	0.830509	1	1
FBgn0003087	pim	2L	10362989	0	0.282194	0	0.0940647	0	0	0.356988	0.118996	0	0.345124	0.528233	0.291119	0.234145	0.37884	0.316906	0.309964	0.113037	0	0	0.037679	0.639243	0.392697	0.834498	0.622146	0	0	0	0	0.31101	0.168898	0.159051	0.212986	0.146451	0	0.186469	0.110973	0.174174	0.515186	0.360198	0.349853	0.367514	0	0.724756	0.36409	0.518433	1
FBgn0003089	pip	3L	19291630	0.223532	0.366659	0.215748	0.268646	0.510577	0.690783	0.635351	0.612237	0.881969	0.217655	0	0.366541	0.132281	0.214537	0.175792	0.174203	0.322826	0.439502	0.288367	0.350232	0	0.424637	0.225578	0.216738	0.215748	0.129367	0.299227	0.214781	0.244012	0.365439	0.464412	0.357954	0.0891051	0.263656	0.201636	0.184799	0.464606	0.197757	0.29874	0.320368	0.114871	0.318243	0	0.144371	0.801005	1
FBgn0003090	pk	2R	3038207	2.01205	1.79217	1.72615	1.84346	2.01246	2.3162	1.93063	2.08643	1.50896	1.84027	1.83902	1.72942	1.13002	1.3878	1.26008	1.2593	1.40761	1.42572	1.06165	1.29833	1.87785	1.67898	1.52385	1.69356	1.72615	2.14141	2.0798	1.98245	1.47297	1.06026	1.57329	1.36884	1.41851	1.16539	1.41247	1.33212	1.96178	1.70991	2.18462	1.9521	1.75738	1.79748	1.74315	1.766	0.320255	1
FBgn0003091	Pkc53E	2R	12812160	31.5458	38.3477	35.0276	34.9737	40.4103	40.0004	40.0723	40.161	34.8698	36.4249	40.7011	37.3319	41.1582	36.0624	35.7919	37.6708	33.995	32.9128	39.1935	35.3671	34.1929	32.2693	34.8989	33.787	35.0276	32.306	32.4931	33.2756	34.397	35.7458	40.2534	36.7987	23.6983	32.5526	29.0563	28.4357	42.077	33.7287	43.6207	39.8088	34.4697	35.8432	40.0035	36.7721	0.942328	1
FBgn0003093	Pkc98E	3R	24864896	23.732	28.3859	25.8891	26.0023	32.0514	33.191	25.5293	30.2572	25.9783	33.1511	27.3902	28.8399	26.4209	23.1716	23.1601	24.2509	24.5922	25.2708	24.8806	24.9145	30.7382	24.1694	21.5229	25.4768	25.8891	24.6863	27.9248	26.1667	26.6321	27.0068	23.0164	25.5518	19.7589	22.9056	21.2668	21.3104	30.9331	26.6265	28.6122	28.7239	26.3185	20.7873	26.7107	24.6055	0.978945	1
FBgn0003114	plu	2R	16150463	0	0	0	0	0	0	0	0	0	0	0	0	0	0	0	0	0	0	0.178987	0.0596623	0	0	0	0	0	0	0	0	0	0	0	0	0	0	0	0	0	0	0.257853	0.085951	0	0	0	0	1	1
FBgn0003116	pn	X	2075127	10.1866	9.89197	7.61733	9.23197	8.66403	7.56279	8.34252	8.18978	12.1854	7.14877	8.24224	9.19214	8.26938	9.25485	7.96626	8.49683	8.40501	11.0233	9.69347	9.70726	6.05585	6.25705	9.30701	7.20664	7.61733	8.0062	5.91652	7.18002	10.8188	8.16313	7.43381	8.80525	12.912	14.3697	13.4691	13.5836	8.97315	9.30249	8.60832	8.96132	11.5157	10.7334	7.89039	10.0465	0.220568	1
FBgn0003117	pnr	3R	11851819	0.917225	0.540759	0.951068	0.803017	1.07268	0.809748	0.570076	0.817501	0.649284	0.765419	0.790195	0.734966	0.704708	0.641168	0.602384	0.64942	0.5372	0.739773	0.913551	0.730175	1.91251	0.125285	0.799657	0.945817	0.951068	0.75809	0.656632	0.788597	1.38048	1.18063	0.755883	1.10566	0.7899	0.747561	0.827105	0.788189	0.997503	0.653939	0.514581	0.722008	0.815026	0.621631	0.574009	0.670222	1	1
FBgn0003118	pnt	3R	19116826	5.7086	6.01074	5.08927	5.60287	6.63077	6.88859	5.56615	6.36184	3.46533	4.36679	5.28181	4.37131	5.95806	5.6039	5.42456	5.66217	3.65578	3.84853	4.08968	3.86466	8.25428	7.01843	7.54689	7.60653	5.08927	6.13785	4.30153	5.17622	3.80902	4.60063	3.72461	4.04475	3.17132	2.82013	3.57107	3.18751	4.54955	3.50336	3.65758	3.9035	3.95256	3.7788	4.31665	4.016	0.148311	1
FBgn0003124	polo	3L	20302754	0	0	0.133772	0.0445907	0	0	0.143178	0.047726	0	0	0	0	0.0469518	0	0.042364	0.0297719	0.0453358	0	0.0501369	0.0318242	0	0	0.502018	0.167339	0.133772	0.191934	0.103903	0.143203	0	0	0.063791	0.0212637	0	0	0	0	0.0544796	0	0.0563296	0.0369364	0.368484	0.157385	0.170015	0.231961	1	1
FBgn0003129	Poxm	3R	4143895	2.66453	1.46217	0.818619	1.64844	1.67872	1.5931	2.92059	2.06414	2.29675	1.12941	1.73816	1.72144	1.05351	1.44625	1.41146	1.30374	2.18864	1.34425	1.49998	1.67762	1.09744	1.07091	0.91024	1.0262	0.818619	1.50079	0.847781	1.05573	2.62909	2.34904	2.08197	2.35337	2.1966	2.14484	2.69513	2.34552	2.32742	2.43505	2.21001	2.32416	2.30501	2.14024	1.63044	2.02523	0.631873	1
FBgn0003130	Poxn	2R	11714198	0.290764	0.113362	0.133987	0.179371	0.494627	0.293363	0.286836	0.358275	0.466708	0.523507	0.334001	0.441405	0.235163	0.20292	0.0424321	0.160172	0.181654	0.208461	0.100442	0.163519	0	0.157753	0.502865	0.220206	0.133987	0.192254	0.10407	0.143437	0.56222	0.39668	0.319504	0.426135	0.353032	0.252787	0.0749077	0.226909	0.139946	0.206962	0.204877	0.183928	0.147638	0.157647	0.218361	0.174549	0.619492	1
FBgn0003132	Pp1-13C	X	15253134	0.534846	0.278051	0.49296	0.435286	0.606541	0	0.351747	0.319429	0.286152	0.850144	0.136525	0.424274	0.519063	0.373248	0.312229	0.401513	0.668263	0.127814	0.184758	0.326945	0	0.386932	0.20555	0.197494	0.49296	0.589403	0.893412	0.658592	0.229819	0.332837	0.548508	0.370388	0.144301	0.309982	0.0918658	0.18205	0.257425	0.338388	0.266166	0.287326	0.271573	0.386647	0.26777	0.308663	0.803445	1
FBgn0003134	Pp1alpha-96A	3R	20343979	89.0437	83.5596	71.2203	81.2745	92.9357	93.4943	89.1807	91.8702	85.3886	82.6186	78.1274	82.0449	73.1851	78.8863	73.3466	75.1393	72.3632	71.1946	70.0689	71.2089	100.7	83.3615	89.4383	91.1666	71.2203	79.8317	86.0023	79.0181	100.063	93.8251	71.8384	88.5755	65.5365	70.1289	68.2798	67.9817	76.1988	79.993	77.5096	77.9005	75.1758	66.1983	70.874	70.7494	0.346534	1
FBgn0003137	Ppn	3R	24346387	59.0245	51.1223	47.8533	52.6667	50.3306	58.4001	53.3835	54.0381	40.0916	47.5272	37.8319	41.8169	56.513	63.7076	54.294	58.1715	38.4202	44.2267	39.8161	40.821	83.6028	74.01	70.7463	76.1197	47.8533	60.6764	52.0293	53.5197	51.0703	46.1366	47.1727	48.1265	37.8424	37.5627	41.96	39.1217	51.6591	57.2157	45.7685	51.5478	41.7345	45.0574	25.9615	37.5845	0.00187774	0.129152
FBgn0003138	Ptp61F	3L	1342493	15.1852	15.8998	15.8715	15.6522	15.4885	16.1203	17.202	16.2703	15.2303	18.3798	16.6764	16.7622	13.7134	13.2264	13.7827	13.5742	12.6352	13.7256	13.5518	13.3042	18.3458	13.8749	14.0075	15.4094	15.8715	16.5306	15.6105	16.0042	13.4783	11.7853	13.523	12.9289	10.1016	9.0961	9.25972	9.48581	13.7704	13.8785	14.7573	14.1354	14.3613	11.5573	12.2525	12.7237	0.895014	1
FBgn0003139	PpV	X	6265098	12.9033	13.0342	9.75432	11.8973	10.6194	11.5814	12.2935	11.4981	10.02	9.60535	12.3146	10.6466	8.2084	10.1725	10.3028	9.56123	9.72677	11.1168	10.1702	10.3379	11.5706	11.9812	9.58712	11.0463	9.75432	10.6522	9.37924	9.92859	12.9049	10.5362	13.5843	12.3418	10.3748	9.28988	10.5853	10.0833	11.6992	11.8666	11.021	11.5289	11.3548	11.8996	12.5572	11.9372	1	1
FBgn0003140	PpY-55A	2R	13842900	0	0	0	0	0	0	0	0	0	0	0	0	0	0.100083	0	0.033361	0	0.102816	0	0.034272	0	0	0	0	0	0	0.410674	0.136891	0	0	0	0	0	0	0	0	0	0	0	0	0	0	0	0	1	1
FBgn0003141	pr	2L	20073719	65.4667	56.6428	47.6971	56.6022	57.2727	49.6963	56.5864	54.5185	60.0444	56.4898	56.1015	57.5452	55.7694	63.1999	64.4242	61.1312	55.7001	57.4387	57.0758	56.7382	60.091	59.8786	60.0243	59.998	47.6971	57.9218	57.8026	54.4738	45.2768	43.9412	38.3651	42.5277	45.4189	49.732	54.6169	49.9226	40.2122	47.9285	38.4749	42.2052	49.2288	53.7496	56.3432	53.1072	0.180401	1
FBgn0003145	prd	2L	12082997	0	0	0	0	0	0	0	0	0	0.138156	0	0.046052	0	0	0	0	0	0	0	0	0	0	0	0	0	0	0	0	0	0	0	0	0	0	0	0	0	0.0660849	0	0.0220283	0	0	0	0	1	1
FBgn0003149	Prm	3L	8725958	51.3111	54.5406	49.8723	51.908	43.9455	43.7263	44.5207	44.0642	26.8407	38.5687	33.2648	32.8914	50.9865	39.6152	46.7044	45.7687	34.7921	36.6815	34.9146	35.4627	63.8655	51.8002	53.4914	56.3857	49.8723	62.182	64.7548	58.9364	32.0659	38.7455	42.472	37.7611	18.2398	24.8237	23.1412	22.0682	35.8243	36.0713	53.2135	41.703	30.1461	25.517	37.5043	31.0558	0.00322289	0.198201
FBgn0003159	ptr	X	2238980	11.4355	9.93384	11.4123	10.9272	10.7572	11.129	10.0855	10.6572	10.6355	11.4977	9.08469	10.406	10.9903	10.6125	9.3966	10.3331	9.76809	9.30106	10.0157	9.69495	8.95219	10.6607	7.7901	9.13433	11.4123	10.1424	9.56635	10.3737	9.07967	10.037	11.4443	10.187	7.75099	7.36965	9.07252	8.06439	8.16042	9.21228	10.3445	9.23907	7.28399	7.9965	9.42538	8.23529	0.961883	1
FBgn0003162	Pu	2R	17062822	64.5494	62.9128	57.4406	61.6343	61.7836	60.3611	56.365	59.5032	54.9894	48.63	51.8219	51.8138	77.0267	73.1697	80.105	76.7671	50.0399	51.7674	54.1867	51.998	68.6965	68.6538	73.0981	70.1495	57.4406	71.4529	72.2885	67.0607	50.8516	52.6663	44.4134	49.3104	40.3007	44.9834	49.7711	45.0184	49.2113	46.5208	48.6491	48.1271	61.1758	64.4242	76.3168	67.3056	0.246868	1
FBgn0003165	pum	3R	4893300	31.966	36.0647	34.3579	34.1295	41.3881	42.1812	37.2779	40.2824	32.2227	38.4856	36.8775	35.8619	37.3883	37.5837	36.1133	37.0284	35.8946	35.7449	35.6483	35.7626	38.4195	34.3871	37.9017	36.9028	34.3579	35.1949	33.7238	34.4255	26.7655	30.3718	32.9917	30.043	21.0233	24.7641	21.2353	22.3409	34.3402	26.861	33.9631	31.7214	27.4869	26.2448	31.1098	28.2805	0.512905	1
FBgn0003169	put	3R	10444954	14.4309	14.1124	14.1306	14.2246	15.9694	16.1266	12.5795	14.8918	12.2282	17.9595	15.8393	15.3423	13.8845	12.319	13.5945	13.266	13.185	11.3925	14.1026	12.8934	14.6398	12.5238	12.7395	13.301	14.1306	13.8919	12.4355	13.486	19.5575	18.7608	20.3747	19.5643	16.3639	16.0832	15.584	16.0104	16.8372	15.2859	17.938	16.687	17.4678	15.5318	17.8685	16.956	0.767197	1
FBgn0003174	pwn	2R	3170077	1.02153	0.762764	0.502149	0.762148	1.17462	1.51349	1.20927	1.29913	0.930531	0.652369	0.938722	0.840541	0.639495	0.666688	0.696281	0.667488	0.596819	0.68353	0.525639	0.601996	0.95254	0.443413	0.628141	0.674698	0.502149	0.362331	0.731301	0.531927	0.555995	0.476776	0.479699	0.504157	0.468533	0.353671	0.561469	0.461224	0.49455	0.48555	0.612893	0.530998	0.381893	0.407785	0.758916	0.516198	0.213978	1
FBgn0003175	px	2R	18381802	14.239	15.6354	12.7758	14.2167	17.174	15.0565	15.3181	15.8495	15.4265	15.8399	13.8758	15.0474	16.089	13.8953	15.1332	15.0392	16.8216	15.0421	14.8679	15.5772	16.393	14.5549	17.8505	16.2661	12.7758	14.6019	14.1831	13.8536	13.0584	15.7919	12.6248	13.825	13.9151	13.8338	14.6665	14.1385	16.8612	14.8208	13.0345	14.9055	14.979	13.6886	12.9654	13.8777	1	1
FBgn0003178	PyK	3R	18193234	204.071	205.353	205.945	205.123	226.884	233.729	229.083	229.899	202.076	192.27	195.834	196.727	170.04	181.559	199.687	183.762	166.406	180.425	169.462	172.098	190.381	198.718	173.328	187.476	205.945	187.467	198.007	197.14	228.166	183.895	162.333	191.465	200.191	185.487	174.812	186.83	190.645	183.969	165.248	179.954	217.414	190.998	195.73	201.381	0.0584043	1
FBgn0003187	qua	2L	17486806	0.306178	0.24193	0.376436	0.308181	0.175895	0.412073	0	0.195989	0.409788	0.194567	0.316842	0.307066	0.199448	0.288716	0.208702	0.232289	0.191422	0.370756	0.500218	0.354132	0	0.224418	0	0.074806	0.376436	0.0683461	0.29615	0.246977	0.133307	0.431781	0.318208	0.294432	0.125555	0.134856	0.105124	0.121845	0.248892	0.387771	0.355824	0.330829	0.157529	0.222783	0.103537	0.161283	0.440347	1
FBgn0003189	r	X	16549412	7.0178	5.34415	6.13248	6.16481	5.8139	7.70601	4.99009	6.17	5.70513	5.21529	5.12016	5.34686	3.08103	2.70344	2.60453	2.79633	4.74005	4.27981	3.66786	4.22924	3.72858	4.54952	4.15086	4.14299	6.13248	3.70613	4.38402	4.74088	5.2282	5.2534	4.98722	5.15627	6.72362	5.24925	6.55155	6.17481	5.55187	6.77601	4.85312	5.727	6.08549	7.28875	4.33477	5.903	0.481678	1
FBgn0003204	ras	X	10638535	26.8232	26.9664	26.9626	26.9174	28.8782	27.4788	27.7084	28.0218	21.7289	27.1385	21.4864	23.4513	29.2872	27.1863	26.5721	27.6819	23.6078	27.7912	23.5637	24.9876	34.6016	38.6671	33.1917	35.4868	26.9626	28.396	28.8198	28.0595	31.444	26.9465	26.7457	28.3787	30.44	28.7252	28.2624	29.1425	33.5777	32.0861	28.2141	31.2926	32.1929	27.8324	25.802	28.6091	0.161756	1
FBgn0003205	Ras85D	3R	5336283	21.9984	22.0748	22.3189	22.1307	24.5122	27.7009	25.7387	25.9839	21.8969	28.9493	26.1179	25.6547	20.6321	22.8493	21.0053	21.4956	18.9632	20.5391	22.3263	20.6095	23.3889	24.7973	23.5935	23.9266	22.3189	25.9337	22.7071	23.6532	25.6465	22.1264	25.4085	24.3938	17.1154	17.4196	19.859	18.1313	24.2129	23.3856	21.7253	23.1079	20.8678	21.7279	26.808	23.1346	0.851943	1
FBgn0003206	Ras64B	3L	4139076	24.153	23.5434	15.1609	20.9524	24.262	17.8566	19.1025	20.407	21.3887	21.8435	17.8582	20.3635	17.0413	16.4195	18.5973	17.3527	15.8044	16.5694	15.8957	16.0898	21.997	18.7538	24.0062	21.5857	15.1609	22.1653	18.7815	18.7026	13.1519	18.6586	19.4011	17.0705	13.2296	13.033	15.3425	13.8684	14.2306	14.4249	15.4392	14.6982	16.7043	18.8528	18.1383	17.8985	0.902593	1
FBgn0003209	raw	2L	8709880	18.3587	17.4517	15.1064	16.9723	20.8295	20.1687	19.7981	20.2654	18.595	18.3911	15.2375	17.4079	15.7989	15.3564	18.0309	16.3954	13.9486	14.1772	12.6702	13.5987	18.7946	15.2762	16.1131	16.728	15.1064	16.5149	16.1747	15.932	13.5732	16.3351	17.1191	15.6758	11.2396	10.5543	10.6966	10.8302	16.2638	15.6712	15.6763	15.8704	13.9938	14.4599	14.1925	14.2154	0.0983946	1
FBgn0003210	rb	X	4429668	14.8968	13.4712	14.2926	14.2202	12.7893	12.775	13.5615	13.0419	11.6895	14.4845	12.5324	12.9021	12.6472	12.6898	12.6537	12.6636	11.2907	12.3093	11.768	11.7893	16.4109	16.5412	16.3056	16.4192	14.2926	14.4729	14.0108	14.2588	13.0425	11.5553	13.0335	12.5438	11.2924	11.933	11.8925	11.706	14.8784	13.6509	14.72	14.4164	15.0569	13.3096	14.5666	14.311	0.785274	1
FBgn0003218	rdgB	X	13656785	33.7594	36.9974	37.5625	36.1064	47.4139	43.4954	42.4685	44.4593	39.7244	50.1371	43.6065	44.4893	46.2376	43.5867	48.5646	46.1296	45.5516	47.2769	47.9069	46.9118	40.4808	35.6076	40.779	38.9558	37.5625	41.9829	41.2531	40.2662	37.3027	40.4299	40.8573	39.53	25.4587	32.2164	29.9635	29.2129	38.0219	31.9761	36.6811	35.5597	29.0391	28.7696	30.7226	29.5104	0.611416	1
FBgn0003227	rec	3R	11648741	5.79738	7.19514	6.5475	6.51334	8.75058	8.73263	7.16896	8.21739	7.20819	8.02095	7.44091	7.55668	8.26775	6.58149	7.65056	7.49993	7.49859	6.4978	7.8978	7.29806	3.63211	4.60759	7.15478	5.13149	6.5475	5.72287	5.43629	5.90222	6.31544	7.31709	6.24453	6.62569	2.67665	5.74986	4.50198	4.3095	7.30985	5.65684	6.94855	6.63841	5.47274	5.26826	6.66337	5.80146	0.623066	1
FBgn0003231	ref(2)P	2L	19542446	74.3486	71.8664	69.017	71.744	77.3917	80.9631	72.1482	76.8343	76.2723	74.8115	67.0158	72.6999	61.8504	61.795	60.9808	61.5421	59.3429	63.44	69.0838	63.9556	74.2424	70.5221	67.7398	70.8348	69.017	71.6143	74.6472	71.7595	72.7679	75.1549	77.6108	75.1779	63.3939	64.0911	66.6319	64.7056	74.0185	71.6145	75.9961	73.8764	75.4455	69.3845	69.141	71.3237	0.781452	1
FBgn0003248	Rh2	3R	14725145	74.134	82.2832	75.8443	77.4205	82.6002	83.0244	67.5256	77.7167	70.9968	80.129	63.7722	71.6327	61.7938	61.7373	63.8343	62.4551	57.1969	58.7286	51.5594	55.8283	75.5709	75.0846	68.9478	73.2011	75.8443	60.455	60.6787	65.6593	76.6639	86.7317	104.049	89.1482	59.5039	64.4489	59.7194	61.2241	67.0806	58.1601	82.6399	69.2935	65.3719	58.8176	80.6634	68.2843	0.333861	1
FBgn0003249	Rh3	3R	15906772	267.007	300.023	326.205	297.745	322.32	247.774	253.187	274.427	246.548	284.956	286.699	272.734	223.611	169.7	268.102	220.471	266.002	264.953	244.935	258.63	292.731	270.413	279.531	280.892	326.205	284.319	283.36	297.961	257.291	267.443	347.09	290.608	257.331	244.892	210.532	237.585	290.977	277.502	306.01	291.496	256.602	232.619	293.51	260.91	0.670564	1
FBgn0003250	Rh4	3L	16845621	328.808	381.393	391.094	367.098	418.538	358.742	342.373	373.218	303.409	407.066	394.256	368.244	276.234	223.093	327.993	275.773	320.931	327.242	278.216	308.796	379.556	388.016	416.864	394.812	391.094	374.307	379.31	381.57	361.113	343.689	459.708	388.17	347.395	292.482	265.933	301.937	309.775	341.116	372.557	341.149	322.357	260.43	374.426	319.071	0.753012	1
FBgn0003254	rib	2R	15157583	0.340544	0.0663816	0.235397	0.214108	0.217225	0.171795	0.251948	0.213656	0.34162	0.243585	0.260775	0.281993	0.110162	0.148529	0.223651	0.160781	0.159557	0.152585	0.0882287	0.133457	0	0	0.0981454	0.0327151	0.235397	0.0562853	0.121889	0.137857	0.0731604	0.238412	0.224509	0.178694	0.103359	0.148023	0.175477	0.142286	0.0409716	0.242389	0.127104	0.136822	0.0432233	0.184632	0	0.0759518	0.66026	1
FBgn0003255	rk	2L	13982726	0.499071	0.924303	0.690236	0.704537	0.530602	0.901736	0.984658	0.805665	1.0013	0.692118	0.496635	0.730018	0.915155	0.870812	0.875062	0.88701	0.729026	0.986245	0.752088	0.822453	1.04061	0.523034	0.840085	0.801243	0.690236	1.08474	0.79036	0.855112	1.28825	1.38347	0.952798	1.20817	0.831499	0.723101	0.578617	0.711072	1.24984	1.07269	1.00522	1.10925	0.818608	0.576527	0.905858	0.766998	1	1
FBgn0003256	rl	2RHet	198176	37.852	35.7588	36.1047	36.5718	39.649	38.5622	42.7038	40.305	42.0257	39.3265	38.6375	39.9966	41.3797	42.8048	40.3504	41.5116	39.7732	37.1738	37.377	38.108	27.8678	31.2102	33.5818	30.8866	36.1047	31.9527	30.3566	32.8047	42.7055	47.1248	48.9387	46.2563	23.9957	31.9262	37.4128	31.1116	47.7161	36.7671	49.6592	44.7141	42.2984	42.3725	46.9586	43.8765	0.862026	1
FBgn0003257	r-l	3R	16896275	5.95544	4.9021	4.87915	5.24556	3.65828	3.75543	3.26388	3.5592	3.18627	3.94427	5.19399	4.10818	5.16426	4.15607	3.91121	4.41051	3.82386	4.68466	4.57168	4.36007	4.90576	5.20602	6.48485	5.53221	4.87915	4.04713	3.43444	4.12024	5.79331	5.2117	5.74402	5.58301	3.68219	4.06283	3.5802	3.77507	4.61808	4.1604	6.66839	5.14896	4.2839	4.12588	5.7147	4.70816	0.585045	1
FBgn0003261	Rm62	3R	1826148	118.258	117.496	114.947	116.9	126.045	127.439	109.602	121.029	114.526	128.854	116.264	119.881	113.346	105.505	114.166	111.006	106.968	112.501	107.344	108.938	117.393	105.573	101.717	108.228	114.947	120.033	109.062	114.681	149.775	154.202	128.436	144.138	110.216	120.937	128.194	119.782	167.233	142.092	154.148	154.491	140.908	130.666	126.698	132.757	0.507703	1
FBgn0003267	ro	3R	22702493	0	0	0	0	0.241252	0	0.279815	0.173689	0.227635	0	0	0.0758783	0.087931	0.395939	0.0827929	0.188888	0	0	0.48998	0.163327	0	0.615659	0	0.20522	0	0	0.406153	0.135384	0.243782	0.264793	0.238926	0.249167	0	0.11815	0.280124	0.132758	0	0.134594	0.423516	0.186037	0.288072	0	0	0.096024	0.40947	1
FBgn0003268	rod	3R	27406394	0.861906	0.711657	0.560758	0.71144	0.86245	1.38115	0.55017	0.931257	0.77308	0.58024	0.465906	0.606409	0.688859	0.513036	0.636347	0.612747	0.839355	0.527047	0.490393	0.618932	0.375877	0.495165	0.409184	0.426742	0.560758	0.502848	0.834805	0.632804	0.784281	0.615245	0.646229	0.681918	0.882292	0.771343	0.627002	0.760212	0.829682	0.697681	1.03447	0.853944	0.72082	0.934624	0.863024	0.839489	0.236821	1
FBgn0003270	amos	2L	18596047	0	0	0	0	0	0	0	0	0	0	0	0	0	0	0	0	0.0913022	0	0	0.0304341	0	0	0	0	0	0	0	0	0	0	0	0	0	0.127055	0	0.0423517	0	0	0.145461	0.048487	0	0	0	0	1	1
FBgn0003274	RpLP2	2R	12473599	1014.18	971.752	906.817	964.25	883.028	896.55	852.712	877.43	1079.18	923.716	830.977	944.624	792.267	830.47	908.756	843.831	953.876	1008.04	947.482	969.799	1105.28	1127.22	1058.01	1096.84	906.817	992.243	980.644	959.901	1279.31	1117.15	988.054	1128.17	1387.48	1279.33	1164.64	1277.15	1375.54	1317.13	1039.91	1244.19	1467.01	1283.25	1094.94	1281.73	0.110518	1
FBgn0003275	RpII18	3R	1197517	19.9518	17.5033	16.0906	17.8486	19.6212	23.2755	25.2179	22.7049	21.0155	22.5959	21.4857	21.699	22.1868	24.1487	24.0226	23.4527	14.8014	19.2207	22.1842	18.7354	27.7343	31.7999	25.1599	28.2314	16.0906	19.376	20.0858	18.5175	21.7007	20.3701	21.9229	21.3312	20.6908	16.5322	16.3851	17.8694	24.9076	20.414	20.4786	21.9334	20.578	20.959	20.9141	20.817	0.846626	1
FBgn0003277	RpII215	X	11456806	11.0291	10.7409	10.1653	10.6451	10.8662	11.178	10.3385	10.7942	10.4131	9.42381	9.63058	9.8225	10.3484	10.4132	10.4734	10.4117	9.60253	10.3041	11.3435	10.4167	9.24956	9.96462	9.95409	9.72276	10.1653	10.3942	9.6462	10.0686	9.8642	10.4349	10.4188	10.2393	9.12887	9.08926	9.77184	9.32999	10.5927	9.16441	10.1328	9.9633	9.55312	9.79494	9.8191	9.72239	0.515169	1
FBgn0003278	RpI135	2L	404305	2.76015	2.07817	3.77213	2.87015	1.61904	2.40072	2.62897	2.21624	2.13871	1.99698	2.40522	2.1803	4.61845	3.75277	2.80589	3.7257	2.14055	3.13879	3.58374	2.95436	4.76292	3.40836	4.06019	4.07716	3.77213	3.46124	2.38478	3.20605	3.76254	3.59819	2.67727	3.346	3.11998	2.4823	2.99165	2.86464	4.35191	2.89043	3.22083	3.48772	2.99629	3.09623	3.00198	3.0315	1	1
FBgn0003279	RpL4	3R	23748515	658.238	615.131	596.269	623.213	549.062	581.021	546.698	558.927	609.538	647.13	531.276	595.981	492.526	476.748	519.353	496.209	594.702	599.514	587.306	593.841	660.242	641.692	650.915	650.95	596.269	584.271	610.628	597.056	663.826	620.682	572.126	618.878	871.155	669.023	647.211	729.13	697.591	716.975	559.158	657.908	729.253	656.356	580.777	655.462	0.100082	1
FBgn0003285	rst	X	2846241	2.65777	3.13843	2.72959	2.84193	3.42309	2.68154	3.22115	3.10859	3.29082	2.60716	3.37275	3.09024	3.14434	2.78214	2.79277	2.90642	2.75148	2.44981	2.28215	2.49448	3.6593	3.79057	2.45142	3.30043	2.72959	2.46026	2.88119	2.69035	1.72935	2.16194	2.97042	2.28724	1.50584	1.84845	1.40864	1.58764	2.9239	2.63039	2.75865	2.77098	2.23633	2.42912	2.6232	2.42955	0.475689	1
FBgn0003292	rt	3L	11577222	0.826486	1.289	1.71396	1.27648	1.75739	1.35505	1.52873	1.54706	1.16074	1.67498	0.791136	1.20895	0.868938	0.468627	1.17605	0.837872	1.35536	1.11098	1.28476	1.25037	1.14887	0.896875	1.07201	1.03925	1.71396	1.50281	0.81355	1.34344	0.843445	1.20545	0.817326	0.955407	0.836196	1.2574	0.798515	0.964037	1.19338	0.637289	1.49097	1.10721	1.1016	0.392094	0.620669	0.704788	0.289187	1
FBgn0003295	ru	3L	1370628	0.375205	0.585175	0.691643	0.550674	1.2765	1.13568	1.11041	1.1742	0.752781	1.07351	0.574651	0.800314	1.03171	0.916444	1.20469	1.05095	1.4064	1.27771	0.777669	1.15393	0	0.610741	0.648888	0.419876	0.691643	0.620217	0.671514	0.661125	1.20917	1.22583	1.97892	1.47131	0.455536	0.733922	0.870018	0.686492	0.541766	0.979218	1.02697	0.849318	0.952569	0.610291	0.469615	0.677492	0.474468	1
FBgn0003300	run	X	20565468	0.821345	0.213204	0.125997	0.386849	1.04804	0.27585	0.404853	0.576248	0.549228	0.260749	0.314275	0.374751	0.57594	0.430076	0.639489	0.548502	0.598791	0.883525	0.662204	0.71484	0.760641	0	0.315222	0.358621	0.125997	0.543066	0.976847	0.548637	0.588467	0.31942	0.481387	0.463091	0.331333	0.357021	0.210935	0.299763	0.329397	0.389736	0.817675	0.512269	0.347501	0.445317	0.614831	0.469216	0.442008	1
FBgn0003301	rut	X	14681661	17.1319	18.8196	16.5218	17.4911	18.4809	18.5023	16.8364	17.9399	14.5049	20.8241	19.5611	18.2967	18.2576	15.6354	17.0128	16.9686	16.3332	18.6822	16.2436	17.0863	22.2854	21.9608	21.0732	21.7731	16.5218	23.2568	23.9072	21.2286	16.6368	17.6575	21.8503	18.7149	13.492	15.7413	13.243	14.1588	21.5781	15.8684	22.5316	19.9927	15.7873	13.5308	18.1151	15.8111	0.569122	1
FBgn0003302	rux	X	5929786	3.32448	4.18782	4.00694	3.83975	5.00268	4.91837	5.29776	5.07294	4.00332	2.72639	2.57725	3.10232	3.996	3.43104	2.99543	3.47416	2.4066	4.03344	4.07093	3.50366	3.96272	4.89771	5.02021	4.62688	4.00694	3.40712	2.56304	3.3257	2.7559	3.10435	3.47833	3.11286	1.75939	2.22321	2.37192	2.11817	3.57137	3.83259	3.31221	3.57206	3.91224	3.88414	3.72298	3.83979	0.098909	1
FBgn0003308	ry	3R	8858259	9.57293	10.3782	9.75577	9.9023	10.2604	11.1505	11.4398	10.9502	8.18222	8.75864	10.43	9.12362	11.783	13.6056	12.449	12.6125	11.2802	13.0844	10.6466	11.6704	15.002	16.2158	15.8826	15.7001	9.75577	15.2838	14.8207	13.2868	15.8517	15.3291	9.78325	13.6547	19.1818	18.0993	18.6483	18.6431	15.1336	15.6586	12.9363	14.5762	18.0203	14.8113	11.4946	14.7754	0.128475	1
FBgn0003310	S	2L	1049800	7.17115	8.69885	8.64374	8.17125	8.75375	8.10618	7.92581	8.26191	7.62012	8.92893	7.52545	8.02483	9.00013	7.69205	8.76028	8.48415	6.86518	8.28293	7.9592	7.70244	8.37034	7.20551	7.96186	7.8459	8.64374	7.77095	8.65133	8.35534	7.84614	8.51416	7.5878	7.9827	4.60128	5.91681	5.98756	5.50188	7.8618	7.71931	8.32703	7.96938	7.11386	6.84015	7.94504	7.29968	0.804402	1
FBgn0003312	sad	3R	7702957	0.570744	0	0	0.190248	0.161813	0.191949	0	0.117921	0.305358	0	0.145689	0.150349	0.492356	0.132767	0.277654	0.300926	0.118853	0.204588	0.197159	0.173533	0	0	0	0	0	0.251585	0	0.0838617	0.326992	0.266382	0.33447	0.309281	0.23098	0.0826967	0.196063	0.169913	0	0.18055	0.094677	0.0917423	0.579601	0	0.190495	0.256699	1	1
FBgn0003313	sala	2L	11484707	0	0	0	0	0	0	0	0	0.391626	0	0	0.130542	0	0	0	0	0	0	0	0	0.904454	0	0	0.301485	0	0	0	0	0	0	0	0	0	0	0	0	0	0	0.242849	0.0809497	0.247782	0	0	0.082594	0.506152	1
FBgn0003317	sax	2R	3693983	8.22026	8.70793	9.26961	8.7326	9.65263	9.01731	9.09087	9.2536	11.9219	9.03554	10.161	10.3728	7.54158	7.66746	7.6537	7.62091	8.93283	7.20906	7.26247	7.80145	11.8057	8.73356	7.82354	9.45427	9.26961	9.09089	8.20722	8.85591	10.0845	10.1385	10.727	10.3167	8.38584	8.09423	8.16202	8.21403	8.56394	8.61117	10.5391	9.23807	10.0669	7.6383	8.93188	8.87903	0.204116	1
FBgn0003319	Sb	3R	11954451	0.803543	0.696232	0.329162	0.609646	0.37969	0.180162	0.440382	0.333411	0.501562	0.340598	0.410226	0.417462	0.404357	0.436148	0.286665	0.375723	0.306774	0.288038	0.339261	0.311358	0.496436	0.29066	0.205876	0.330991	0.329162	0.413237	0.383499	0.375299	0.268548	0.166683	0.392414	0.275882	0.180663	0.271665	0.0920117	0.181447	0.257834	0.169463	0.222158	0.216485	0.362672	0.19363	0.178797	0.245033	1	1
FBgn0003321	sbr	X	10726785	20.7733	24.1384	19.3361	21.4159	22.2168	27.1845	21.1014	23.5009	18.982	24.4213	22.1292	21.8442	20.7924	19.8076	21.3422	20.6474	19.7234	18.0999	21.67	19.8311	16.9637	19.8642	20.275	19.0343	19.3361	24.2069	21.6445	21.7292	23.2433	24.1427	23.0517	23.4792	14.8578	18.8641	18.1759	17.2993	25.4908	22.8375	24.0534	24.1272	20.6257	19.7938	19.8735	20.0977	0.876437	1
FBgn0003326	sca	2R	8668049	3.55725	4.64632	4.83594	4.3465	4.23572	4.48624	3.77231	4.16476	4.13937	2.71401	3.26884	3.37407	4.28649	4.68556	4.54254	4.50486	4.22229	3.79344	4.36224	4.12599	3.79097	3.95665	4.20385	3.98382	4.83594	3.99843	3.24686	4.02708	4.0123	3.23747	4.22153	3.82377	2.54363	2.82187	2.88692	2.75081	4.10923	3.12267	4.11581	3.78257	3.38661	2.79654	4.05154	3.41156	0.309307	1
FBgn0003328	scb	2R	11136290	5.4667	4.21625	4.82679	4.83658	4.68281	4.00547	3.41936	4.03588	2.20388	4.0048	2.72833	2.979	3.68307	3.48153	3.94144	3.70201	2.6688	2.35858	3.08555	2.70431	4.93581	2.86775	5.34996	4.38451	4.82679	4.47103	3.79338	4.36373	3.43419	4.00955	3.38441	3.60938	2.65316	1.65777	2.51471	2.27521	4.82487	4.16089	3.92554	4.30377	4.29908	4.34628	6.05233	4.89923	0.0247093	0.728368
FBgn0003330	Sce	3R	23506153	7.43743	5.4586	3.83072	5.57558	5.9537	4.63478	3.66848	4.75232	3.68658	4.17243	4.69038	4.18313	4.59968	5.64826	4.72488	4.99094	3.48476	4.23426	3.8538	3.85761	6.48693	4.74757	5.2963	5.51027	3.83072	5.4962	5.01118	4.77937	4.88771	4.59431	5.57634	5.01945	5.66574	4.18375	3.60696	4.48548	4.31668	6.43552	5.11642	5.28954	6.21999	4.15106	5.25676	5.20927	0.881198	1
FBgn0003334	Scm	3R	5459081	10.6895	10.0947	9.31781	10.034	10.9028	11.7196	11.5827	11.4017	10.5865	11.6335	10.6119	10.944	11.0027	9.53258	10.4633	10.3329	9.76855	9.0979	9.54527	9.47057	10.9273	11.1845	10.9135	11.0084	9.31781	9.64853	11.0662	10.0108	9.70514	11.5048	9.7872	10.3324	8.00425	9.23333	8.29151	8.5097	11.0176	9.78317	11.8794	10.8934	9.92897	9.07709	11.3684	10.1248	0.754039	1
FBgn0003339	Scr	3R	2648842	3.60556	3.16411	3.95563	3.5751	4.2663	4.60345	4.25946	4.3764	4.10272	3.84505	3.98235	3.97671	3.95062	4.65438	3.4806	4.02853	3.4204	3.91962	3.56335	3.63446	3.32328	2.90938	4.26643	3.4997	3.95563	3.75204	3.09736	3.60168	3.08555	3.81029	4.22791	3.70792	2.42299	2.66136	2.45647	2.51361	3.60075	3.82495	3.90891	3.7782	3.2906	3.82282	4.44237	3.85193	0.730698	1
FBgn0003345	sd	X	15698405	25.7413	26.5528	24.4083	25.5675	27.4817	28.2244	24.3737	26.6933	26.596	28.6963	23.1758	26.156	27.3686	24.1049	22.3835	24.619	20.7182	23.318	22.3409	22.1257	29.017	25.3554	22.8429	25.7384	24.4083	25.5122	27.3642	25.7616	22.469	24.1472	24.793	23.8031	14.8524	19.7133	19.9809	18.1822	24.8925	22.0287	28.1431	25.0214	21.8039	20.3804	27.101	23.0951	0.515837	1
FBgn0003346	RanGAP	2L	19442041	4.78968	4.41412	2.80928	4.00436	3.8269	4.39319	4.29543	4.17184	2.79553	2.90688	3.55671	3.08637	2.95803	3.69704	3.09264	3.24924	3.4456	3.38178	2.85787	3.22842	3.22811	6.61513	3.34682	4.39669	2.80928	2.68711	4.88356	3.45998	3.43015	3.2516	3.69997	3.46057	2.99568	4.41631	3.88904	3.76701	4.05175	2.75486	3.17812	3.32824	3.90594	3.77729	4.50523	4.06282	0.186407	1
FBgn0003353	sei	2R	19936728	7.71933	9.57401	8.09241	8.46192	9.49967	12.0115	8.5697	10.027	7.98146	8.87676	8.46073	8.43965	8.54234	8.2055	8.20253	8.31679	7.69243	6.23445	8.10689	7.34459	7.94538	7.4441	11.4466	8.94536	8.09241	7.61441	9.41731	8.37471	9.57353	9.71842	9.8337	9.70855	7.63228	6.86886	6.53718	7.01277	10.0601	7.38102	10.4229	9.28801	8.70831	7.76964	9.40526	8.62774	0.501939	1
FBgn0003356	Jon99Cii	3R	25749476	0	0	0	0	0	0.592214	0	0.197405	0	0	0	0	0.189881	0	0.114218	0.101366	0.122231	0	0.135175	0.085802	0	0	0.22558	0.0751933	0	0	0.280135	0.0933783	0.0840716	0.0913177	0.0859941	0.0871278	0	0	0.100818	0.033606	0.0627801	0	0	0.0209267	0	0.106081	0	0.0353603	0.511912	1
FBgn0003357	Jon99Ciii	3R	25747938	0	0	0	0	0	0.203301	0	0.067767	0	0	0	0	0.0651843	0	0.11763	0.0609381	0.125881	0	0.139212	0.0883643	0	0	0.232318	0.0774393	0	0	0	0	0.0865827	0.0940453	0.0885626	0.0897302	0	0	0.103829	0.0346097	0.0646552	0	0	0.0215517	0	0.10925	0	0.0364167	1	1
FBgn0003358	Jon99Ci	3R	25750948	0	0	0	0	0	0	0	0	0	0	0	0	0	0	0	0	0	0	0	0	0	0	0	0	0	0.245898	0	0.081966	0	0.173574	0	0.057858	0	0	0.191632	0.0638773	0	0	0	0	0	0	0	0	1	1
FBgn0003360	sesB	X	10675019	825.676	794.654	788.485	802.938	867.328	880.2	870.697	872.742	774.983	774.947	769.636	773.189	1012.62	952.975	1015.65	993.748	833.849	830.319	819.89	828.019	1038.89	988.613	1036.56	1021.35	788.485	938.468	936.518	887.824	852.319	827.375	762.782	814.159	746.789	726.987	707.798	727.191	753.207	726.352	688.283	722.614	802.172	859.62	871.594	844.462	0.180515	1
FBgn0003366	sev	X	10965474	7.2022	7.14805	7.09965	7.14997	7.20674	6.68371	7.37086	7.0871	5.1927	7.89727	5.81026	6.30008	5.39487	5.02614	5.1825	5.20117	4.90843	5.54996	5.38832	5.28224	6.28176	6.14381	5.63945	6.02167	7.09965	6.46833	6.47944	6.68247	7.64581	7.5678	8.54855	7.92072	6.23471	5.84275	6.84683	6.3081	7.32222	7.62092	7.64753	7.53022	6.96196	6.59869	6.74877	6.76981	0.371068	1
FBgn0003371	sgg	X	2527985	80.1523	88.0172	85.3276	84.499	99.5171	100.591	84.4502	94.8528	92.307	108.231	100.035	100.191	86.6342	83.1184	87.7794	85.844	86.003	89.631	92.9229	89.519	101.201	78.5667	97.2533	92.3403	85.3276	93.7939	85.7689	88.2968	79.862	81.6888	71.6661	77.739	71.76	72.6136	78.4199	74.2645	84.646	72.5862	89.8466	82.3596	72.8145	71.0937	77.5288	73.8123	0.0930823	1
FBgn0003372	Sgs1	2L	4937409	1.02448	0.798896	0.944247	0.922541	1.01658	0.602956	0.336879	0.652138	0.205543	0.325684	0.653773	0.395	0.303797	0.178736	0.274113	0.252215	0.240006	0.520248	0.324406	0.361553	0.632931	0.370577	0.393723	0.465744	0.944247	0.733837	0.488942	0.722342	0.403527	0.438307	0.412754	0.418196	0.172752	0.11133	0.219957	0.168013	0.369816	0.243064	0.382374	0.331751	0.130047	0.324016	0.085484	0.179849	0.000895421	0.0763152
FBgn0003373	Sgs3	3L	11505321	0	0	0	0	0	0	0	0	0	0	0	0	0	0	0	0	0	0.10893	0	0.03631	0	0	0	0	0	0	0.652639	0.217546	0	0	0	0	0	0	0	0	0	0	0	0	0	0	0	0	1	1
FBgn0003374	Sgs4	X	3143534	0.876129	0.512408	0.605637	0.664725	1.11777	0.883962	0.216073	0.739268	0.351559	1.25336	0.167731	0.590883	0.495993	1.22283	0.958989	0.892604	0.547339	0.314056	0.605303	0.488899	2.43576	1.18843	1.26266	1.62895	0.605637	0.579299	0.627211	0.604049	0.188233	0.408914	0.577612	0.391586	0.265927	0.190417	0.112864	0.189736	0.316265	0.103933	0.654009	0.358069	0.778509	0.237512	0.657949	0.55799	0.32444	1
FBgn0003375	Sgs5	3R	13421084	0	0	0	0	0	0	0	0	0	0	0	0	0	0	0	0	0	0	0	0	0	0	0	0	0	0	0	0	0	0	0	0	0	0	0	0	0	0	0	0	0	0	0.265524	0.088508	1	1
FBgn0003377	Sgs7	3L	11502961	0	0	0	0	0	0	0	0	0	0	0	0	0	0	0	0	0	0	0	0	0	0	0	0	0	0	0	0	0	0	0	0	0	0	0	0	0	0	0	0	0	0	0	0	1	1
FBgn0003378	Sgs8	3L	11502067	0	0	0	0	0	0	0	0	0	0	0	0	0	0	0.274251	0.091417	0.29349	0	0	0.09783	0	0	0	0	0	0	0	0	0	0	0	0	0	0	0	0	0	0	0	0	0	0	0	0	1	1
FBgn0003380	Sh	X	17818340	69.9552	78.8977	68.1354	72.3294	89.2508	100.535	82.2371	90.6743	64.2519	90.4057	91.4188	82.0255	95.6946	88.5792	80.8445	88.3728	83.3325	77.5183	87.7688	82.8732	93.0412	77.0087	89.1011	86.3837	68.1354	93.7976	87.6441	83.1924	52.8121	72.8424	70.3477	65.3341	33.8665	56.5022	52.2494	47.5394	88.3681	65.8879	92.4696	82.2419	52.7123	53.7208	71.7018	59.3783	0.59129	1
FBgn0003382	sha	2R	7211819	0.0573588	0	0	0.0191196	0	0	0	0	0.046032	0	0	0.015344	0	0	0	0	0	0	0	0	0	0	0	0	0	0	0	0	0	0	0	0	0	0	0	0	0	0.0272175	0	0.0090725	0	0.031099	0	0.0103663	1	1
FBgn0003386	Shaw	2L	3718185	13.9056	17.7365	18.3473	16.6631	17.5852	19.6555	17.3955	18.2121	13.7598	19.1137	18.4429	17.1055	18.5281	17.6873	16.9135	17.7096	15.3213	15.4458	16.013	15.5934	17.5619	17.268	19.4795	18.1031	18.3473	19.3462	16.771	18.1548	13.3162	14.4748	16.4942	14.7617	8.44	12.2149	10.4714	10.3754	18.1527	12.7749	18.3319	16.4198	12.391	11.9128	15.7962	13.3667	1	1
FBgn0003388	shd	3L	14607558	0.452009	0.161074	0.951907	0.521663	0.36419	0.848816	0.844792	0.685933	0.497304	0.590986	0.644248	0.577513	0.477418	1.42196	1.68985	1.19641	0.0645204	0.370213	0.08536	0.173364	0.382836	1.3449	0.98734	0.905025	0.951907	1.14249	0.747508	0.947302	0.551955	1.07453	1.00432	0.876935	0.0835932	0.179572	0.319307	0.194157	0.536044	0.798407	0.30838	0.54761	0.749465	0.57503	1.03413	0.786208	0.523413	1
FBgn0003390	shf	X	6665477	8.41871	10.0663	10.8632	9.78274	9.54722	12.8353	12.1806	11.521	17.4161	11.2406	10.315	12.9906	5.32581	3.65561	5.62451	4.86864	7.12937	4.82842	6.39798	6.11859	3.81417	3.24825	4.74531	3.93591	10.8632	5.19537	4.95542	7.00466	10.37	6.98533	6.74255	8.03263	8.55547	7.96943	7.51924	8.01471	10.265	6.92429	6.14471	7.778	9.30929	5.88312	5.05778	6.75006	0.33735	1
FBgn0003391	shg	2R	16938107	10.5292	11.7089	11.2551	11.1644	11.1811	12.9492	12.5996	12.2433	12.25	11.7055	11.212	11.7225	11.3069	9.84799	9.60194	10.2523	10.5674	12.0152	11.3852	11.3226	13.8569	9.12727	9.69736	10.8938	11.2551	11.6994	9.76789	10.9075	11.4313	12.6492	13.5548	12.5451	10.8168	9.85781	11.7179	10.7975	11.0352	11.7072	11.875	11.5391	8.8578	9.59347	10.9172	9.78949	0.970331	1
FBgn0003392	shi	X	15786149	84.8611	95.1751	93.4394	91.1585	94.6666	91.7272	83.1842	89.8593	79.6458	89.448	85.8999	84.9979	84.9852	77.284	79.0362	80.4351	77.6089	80.1759	80.3743	79.3864	98.6228	98.5721	99.4445	98.8798	93.4394	104.473	96.1016	98.0047	79.2313	85.1173	91.8246	85.3911	55.0953	70.3586	64.6449	63.3663	105.791	85.7195	112.679	101.396	91.0543	80.4463	98.0185	89.8397	0.923424	1
FBgn0003396	shn	2R	7046591	14.1958	14.3068	12.8311	13.7779	14.1441	16.0559	13.74	14.6467	13.2631	14.2245	12.5722	13.3533	13.5794	13.3052	13.2499	13.3782	13.814	12.8727	12.4947	13.0605	15.7412	13.1531	16.8679	15.2541	12.8311	14.6425	14.7715	14.0817	9.72897	12.8624	13.1465	11.9126	9.38839	9.59669	9.55127	9.51212	13.4334	11.361	12.0395	12.278	10.6477	10.8842	11.8966	11.1428	0.38349	1
FBgn0003401	shu	2R	19728984	0.199946	0.15592	0.368576	0.241481	0.340123	0	0	0.113374	0	0	0.459346	0.153115	0.517456	0.209302	0.35017	0.358976	0.43719	0.215018	0	0.217403	0.370586	0.433951	0.461055	0.421864	0.368576	0.132205	0	0.166927	0.0859155	0.186641	0.17576	0.149439	0.161836	0.34765	0.412117	0.307201	0.288707	0.094877	0.0995034	0.161029	0.507623	0.433631	0.300309	0.413854	1	1
FBgn0003410	sina	3L	16845845	12.262	12.5296	13.0554	12.6157	15.3938	12.7982	11.8878	13.3599	12.3855	11.4929	15.1375	13.0053	13.1996	13.6103	12.928	13.246	11.7877	11.7085	12.2692	11.9218	9.60006	13.7651	13.528	12.2977	13.0554	12.1615	12.3349	12.5173	10.2198	10.2133	11.2898	10.5743	8.64145	10.0627	8.71505	9.13973	12.5159	9.73088	10.258	10.8349	11.2129	9.51388	11.1665	10.6311	0.882012	1
FBgn0003411	sisA	X	11215612	0	0	0	0	0.37356	0	0	0.12452	0	0	0	0	0	0	0	0	0	0	0	0	0	0	0	0	0	0	0	0	0	0	0.193039	0.0643463	0	0	0	0	0.211392	0	0	0.070464	0	0	0	0	1	1
FBgn0003415	skd	3L	20987228	11.926	13.6495	13.0198	12.8651	14.8528	14.464	13.0705	14.1291	12.0599	13.6245	13.2685	12.9843	15.0096	14.554	14.6949	14.7528	14.4814	15.8161	14.8102	15.0359	12.8891	12.1972	12.3227	12.4697	13.0198	13.6981	13.7971	13.505	11.3601	13.3238	13.8565	12.8468	9.18186	10.1761	9.90158	9.75318	15.0779	11.6986	15.2854	14.0206	10.442	10.8822	12.2183	11.1808	0.598379	1
FBgn0003416	sl	X	16244342	1.89733	2.40427	1.69409	1.99856	1.91632	2.15358	2.39811	2.156	2.42674	2.31842	2.36103	2.36873	2.16741	2.42057	2.23253	2.2735	1.75944	2.12536	2.31444	2.06641	3.07699	2.31628	1.709	2.36742	1.69409	2.94028	1.61296	2.08244	2.75153	3.12705	2.71021	2.86293	2.35153	2.11337	2.41361	2.29284	2.5969	2.44771	3.51127	2.85196	2.95037	2.6682	2.04821	2.55559	0.262295	1
FBgn0003423	slgA	X	21245018	55.0602	62.3171	61.2619	59.5464	74.2951	69.8176	69.7793	71.2973	66.5039	72.5458	70.3232	69.791	71.8115	63.1508	67.3775	67.4466	64.2065	60.7212	66.5731	63.8336	62.2355	68.262	67.9507	66.1494	61.2619	63.5786	66.0881	63.6429	57.5088	60.7557	67.5938	61.9528	43.041	49.6985	46.1402	46.2932	57.0628	51.1704	70.8175	59.6836	53.4788	52.2023	64.484	56.7217	0.726213	1
FBgn0003429	slo	3R	20488217	50.2917	54.8231	53.4438	52.8529	64.5503	66.445	59.1643	63.3865	57.5944	73.1566	68.1356	66.2955	55.8498	50.0594	48.0212	51.3101	63.6323	60.4447	64.8808	62.9859	50.046	46.9495	46.3741	47.7899	53.4438	58.5607	56.6326	56.2124	59.1941	65.701	66.7596	63.8849	55.8792	67.8899	65.1366	62.9686	70.3515	55.5357	73.3715	66.4196	51.2924	46.1976	53.5155	50.3352	0.411494	1
FBgn0003430	slp1	2L	3825680	3.47026	2.70614	1.70586	2.62742	3.34513	4.43497	2.73871	3.50627	2.59932	2.86833	2.12597	2.53121	2.09555	1.37233	3.03877	2.16888	2.24022	2.23911	2.6373	2.37221	3.00154	2.00844	2.93409	2.64802	1.70586	3.5183	4.47179	3.23198	1.68997	2.05158	3.15217	2.29791	1.77892	1.1062	1.78817	1.55776	2.78377	2.52491	3.22369	2.84412	2.70182	3.51217	2.66399	2.95933	0.250009	1
FBgn0003435	sm	2R	15407772	46.6932	47.8979	52.1924	48.9278	56.6441	62.8416	57.3552	58.947	44.1603	50.6343	51.7423	48.8456	63.3033	61.9423	60.8726	62.0394	60.2148	60.9164	62.4641	61.1984	48.9833	49.2856	51.0266	49.7652	52.1924	54.929	47.5086	51.5433	39.14	41.6352	48.1928	42.9893	28.2719	36.6093	29.0503	31.3105	44.7922	41.9099	50.4754	45.7258	35.7456	34.5556	42.8134	37.7049	0.462834	1
FBgn0003444	smo	2L	277587	4.04468	4.59969	4.34925	4.33121	4.22851	3.65576	3.90691	3.93039	3.65171	3.45562	3.03282	3.38005	3.97984	4.35155	3.19743	3.84294	4.21135	3.77566	4.39536	4.12746	4.06061	3.93195	4.17754	4.0567	4.34925	3.5658	3.8004	3.90515	4.38113	4.68009	5.07389	4.7117	2.93274	3.58953	4.51568	3.67932	4.4207	4.19836	5.19983	4.6063	4.15023	4.20318	4.89366	4.41569	0.727099	1
FBgn0003447	sn	X	7858057	41.9823	41.8239	36.4111	40.0724	46.2835	42.0105	40.0097	42.7679	37.4298	40.0039	37.9719	38.4685	34.7047	34.548	33.5035	34.2521	33.3175	32.2412	32.1556	32.5714	40.3049	32.2711	39.7709	37.449	36.4111	36.5119	38.8978	37.2736	31.3296	29.5605	32.9679	31.286	27.4783	29.8687	31.1576	29.5015	32.6537	32.3573	39.351	34.7873	30.1638	28.9255	33.0897	30.7263	0.612824	1
FBgn0003448	sna	2L	15476593	0	0	0	0	0	0	0	0	0	0.191827	0	0.0639423	0	0.0701834	0	0.0233945	0	0	0	0	0	0	0	0	0	0	0	0	0	0	0	0	0	0.0874307	0	0.0291436	0.0968094	0.0954428	0	0.0640841	0	0	0	0	1	1
FBgn0003449	snf	X	5203280	19.9135	19.0147	28.0928	22.3403	21.085	17.6313	23.6535	20.7899	25.1131	20.1544	19.6063	21.6246	19.3258	19.1436	16.6071	18.3588	20.4378	16.6072	17.1272	18.0574	18.0774	21.6094	20.1478	19.9449	28.0928	19.0785	19.2017	22.1243	22.1775	21.2438	20.8984	21.4399	19.2428	19.2551	14.6587	17.7189	21.5162	18.8984	19.8199	20.0782	16.9208	17.8477	20.7531	18.5072	0.539846	1
FBgn0003450	snk	3R	8865887	0	0	0	0	0.204417	0	0	0.068139	0	0	0	0	0.0777489	0	0.0701518	0.0493002	0	0	0	0	0	0	0	0	0	0	0	0	0	0	0	0	0	0	0	0	0	0.114044	0	0.0380147	0.122034	0	0	0.040678	1	1
FBgn0003459	stwl	3L	14396610	3.06517	2.6915	1.78728	2.51465	2.44879	2.61399	3.13259	2.73179	2.30058	3.50553	2.06052	2.62221	2.46139	1.71232	1.8647	2.0128	2.30875	2.26158	2.15043	2.24025	3.10799	3.61213	2.02768	2.91593	1.78728	1.83736	2.33383	1.98616	2.54486	2.90601	2.06979	2.50689	3.0366	2.37352	2.33366	2.58126	2.90358	3.18503	2.9361	3.00824	2.86873	2.01611	2.72214	2.53566	0.955932	1
FBgn0003460	so	2R	3306537	4.34677	4.23705	3.30525	3.96302	3.88194	3.61815	3.21604	3.57204	3.40119	3.31644	2.49651	3.07138	2.84749	2.46467	3.55254	2.9549	2.64765	2.57093	3.11573	2.7781	4.43103	3.06603	2.88167	3.45958	3.30525	4.02374	3.11181	3.48027	2.98844	2.43451	3.77321	3.06539	2.90257	2.83418	2.23982	2.65886	3.1905	3.0939	3.73147	3.33862	2.70371	2.47459	2.77466	2.65099	0.645011	1
FBgn0003462	Sod	3L	11105381	212.482	244.785	216.145	224.471	224.831	215.771	205.084	215.229	249.707	231.533	232.3	237.847	156.426	183.455	176.377	172.086	183.346	181.121	183.58	182.682	202.439	222.61	211.117	212.055	216.145	200.53	223.078	213.251	245.904	220.984	226.456	231.115	289.176	235.882	209.045	244.701	215.741	244.768	218.268	226.259	263.083	246.582	279.321	262.995	0.0631745	1
FBgn0003463	sog	X	15497396	27.828	26.1707	27.6947	27.2311	27.7219	26.5035	27.1048	27.1101	23.8255	28.3511	25.6674	25.948	21.9082	18.8839	20.7991	20.5304	21.3661	22.0895	21.7278	21.7278	26.1275	26.7684	25.6146	26.1702	27.6947	24.5465	26.1993	26.1468	15.6674	19.0849	17.4376	17.3966	13.4986	14.7341	13.7159	13.9829	16.6911	18.4533	20.9867	18.7104	16.0003	17.7881	21.1608	18.3164	0.852919	1
FBgn0003464	sol	X	21221357	8.81083	7.96545	9.6262	8.80083	11.2701	9.95338	8.23653	9.82	8.69451	12.0942	10.0008	10.2632	7.98204	7.51849	7.84985	7.78346	8.9836	9.04637	7.88109	8.63702	11.17	11.2719	10.7823	11.0747	9.6262	9.2744	10.8516	9.9174	10.8598	10.7345	11.1407	10.9117	10.3302	9.06774	7.96702	9.12165	13.0672	10.834	11.3633	11.7548	10.5952	8.37782	10.0223	9.66511	0.201101	1
FBgn0003475	spir	2L	20311219	29.4135	30.4509	38.1697	32.678	40.3296	36.449	31.476	36.0849	29.5439	34.5039	30.727	31.5916	35.2204	31.4881	34.6581	33.7889	32.897	33.3912	33.8813	33.3898	37.894	30.866	31.3039	33.3546	38.1697	33.6709	32.9639	34.9348	29.5358	29.4074	29.315	29.4194	19.612	24.8729	22.4881	22.3243	33.4981	30.2441	32.3312	32.0245	28.4887	25.7016	30.8638	28.3514	0.806496	1
FBgn0003479	spn-A	3R	25880418	1.04833	0.613102	0.966258	0.875897	1.7833	1.81904	3.73109	2.44448	2.52397	2.24961	0.602076	1.79189	1.35655	1.55467	1.071	1.32741	1.63734	1.22133	2.44449	1.76772	1.45724	2.8441	2.71958	2.34031	0.966258	1.02729	1.31339	1.10231	1.35142	1.4679	2.41906	1.74613	1.80314	1.13923	1.429	1.45712	0.882997	1.61674	2.19357	1.56444	2.12924	1.421	1.70579	1.75201	0.373093	1
FBgn0003480	spn-B	3R	10153786	1.47619	2.686	2.72117	2.29445	2.92962	2.48232	2.66979	2.69391	2.17192	3.05035	1.13044	2.11757	2.30812	1.54526	1.65171	1.83503	1.46017	2.02842	1.78478	1.75779	0	2.93684	1.98563	1.64082	2.72117	1.62677	1.76132	2.03642	1.69149	1.1483	0.97322	1.271	1.39396	1.28334	1.26776	1.31502	2.24992	1.63443	1.83657	1.90697	1.37417	2.13431	3.07939	2.19596	0.493596	1
FBgn0003482	spn-D	3R	22991440	0	0	0	0	0.84051	0	0	0.28017	0.528711	0.314155	0.756755	0.533207	0.106561	0.229878	0.0961487	0.144196	0.205787	0.118078	0.11379	0.145885	0	0	0	0	0	0	0.235817	0.0786057	0.56617	0.307484	0.289558	0.387737	0.399929	0.715924	0.339473	0.485109	0	0.156306	0	0.052102	0	0	0	0	1	1
FBgn0003483	spn-E	3R	11663159	0.506579	0.507901	0.466907	0.493796	0.061552	0.219047	0.499736	0.260112	0.290389	0.138037	0.277093	0.235173	0.304343	0.277767	0.232358	0.271489	0.203447	0.311294	0.324988	0.27991	0.268259	0.235596	0.166874	0.223576	0.466907	0.287101	0.155424	0.303144	0.497539	0.270211	0.318073	0.361941	0.2343	0.440399	0.261032	0.31191	0.278651	0.240378	0.2521	0.257043	0.440949	0.196185	0.253618	0.296917	1	1
FBgn0003486	spo	3L	5583183	0.308468	0.120273	0.426466	0.285069	0	0.155613	0.15215	0.102588	0.247554	0.294188	0	0.180581	0.399153	0.484352	0.40517	0.429558	0.192707	0.331719	0.266394	0.263607	0.285861	0.16737	0	0.151077	0.426466	0	0.110414	0.17896	0.530185	0	0.135577	0.221921	0.0624184	0.201127	0.317897	0.193814	0.296935	0.292744	0.537282	0.375654	0.313255	0.334493	0.231651	0.293133	0.694399	1
FBgn0003495	spz	3R	22890792	19.7339	17.7848	20.5127	19.3438	19.5178	18.2783	22.2043	20.0001	20.0431	22.1843	18.3714	20.1996	17.2752	19.2088	18.1709	18.2183	16.7624	15.2276	14.0279	15.3393	14.1944	14.8035	21.6191	16.8723	20.5127	15.0333	14.501	16.6823	16.5584	17.2709	14.6691	16.1661	13.4362	14.4746	13.9618	13.9575	11.6817	15.2566	14.4089	13.7824	14.1896	14.794	14.7724	14.5853	0.567422	1
FBgn0003499	sr	3R	13916525	2.87572	3.77982	2.69722	3.11759	3.87287	4.59408	4.57723	4.34806	2.73179	3.2775	3.26047	3.08992	4.00254	3.61534	3.7326	3.78349	3.50317	3.03617	2.81712	3.11882	5.42056	5.40866	5.15142	5.32688	2.69722	3.45641	4.24266	3.46543	2.91118	3.23528	2.56313	2.9032	1.79665	1.63651	1.99636	1.80984	4.73535	3.17154	2.84673	3.58454	2.57217	2.55444	3.11434	2.74698	0.0201572	0.64263
FBgn0003502	Btk29A	2L	8258755	10.9485	11.2651	10.7232	10.9789	13.1753	11.3332	9.92346	11.4773	12.1367	10.3043	10.7705	11.0705	9.35423	11.4986	10.1663	10.3397	11.0088	9.89991	11.3621	10.7569	8.50407	8.51287	11.1449	9.38728	10.7232	9.29567	10.42	10.1463	10.9579	10.346	10.0002	10.4347	7.94175	8.32299	9.02035	8.42836	9.65009	9.66215	10.3985	9.90358	8.96549	10.535	9.45737	9.65262	0.95457	1
FBgn0003507	srp	3R	11811923	24.6776	23.4676	24.3424	24.1625	19.6362	26.7741	21.0764	22.4956	25.2101	21.1	22.4502	22.9201	18.2479	18.9761	17.9676	18.3972	22.5131	20.705	21.4294	21.5492	27.7577	29.4664	23.062	26.762	24.3424	24.6334	26.0324	25.0027	31.1874	25.4962	17.8903	24.858	28.0841	24.6231	27.3099	26.6724	29.3411	26.0229	23.8777	26.4139	27.305	27.078	20.7643	25.0491	0.549567	1
FBgn0003510	Sry-alpha	3R	25866937	0	0.281022	0.498227	0.25975	0.459766	0	0.355505	0.271757	0.433814	0.343691	0.137984	0.305163	0.0582898	0.0628726	0.157782	0.0929815	0.0562835	0.193769	0.186732	0.145595	0	0	0	0	0.498227	0.47656	0.257988	0.410925	0.0774249	0.0840982	0	0.053841	0	0.156647	0.185695	0.114114	0.433625	0.171002	0.35868	0.321102	0.548949	0.195389	0.270631	0.338323	1	1
FBgn0003511	Sry-beta	3R	25865454	1.89348	3.79684	4.73695	3.47576	4.37128	4.09373	2.93527	3.80009	3.90746	3.86962	3.72855	3.83521	3.15017	3.39785	3.15818	3.2354	3.04175	3.19975	3.08355	3.10835	3.00807	3.81595	3.43055	3.41819	4.73695	2.6828	3.87292	3.76422	3.37068	3.40871	4.87442	3.8846	3.50304	3.29222	1.67259	2.82262	3.51518	4.36404	4.98068	4.28663	4.9445	3.66648	3.52102	4.044	0.768058	1
FBgn0003512	Sry-delta	3R	25869068	6.54546	7.48616	5.42958	6.48707	7.60844	7.04425	6.45704	7.03658	5.77821	8.53136	6.51612	6.9419	4.23487	3.27361	6.1774	4.56196	4.90693	5.7875	4.06994	4.92146	7.27891	6.62939	4.27639	6.06156	5.42958	6.20329	9.05927	6.89738	7.5001	5.70257	7.28803	6.83023	7.68194	5.97487	6.63312	6.76331	7.35087	6.10828	7.0576	6.83892	6.42547	5.67816	6.55395	6.21919	0.906059	1
FBgn0003513	ss	3R	12200148	0.681368	1.05581	0.558594	0.765257	1.16429	0.98691	0.750519	0.96724	0.557451	0.777746	0.896908	0.744035	0.709098	0.814765	0.895636	0.8065	0.638623	0.629907	1.00158	0.756703	0.51478	0.450323	1.35561	0.773571	0.558594	0.494154	0.838462	0.630403	0.478793	0.44071	0.519054	0.479519	0.279904	0.452938	0.570217	0.434353	0.955495	0.593348	0.761737	0.770193	0.396517	0.52729	0.382544	0.43545	0.256645	1
FBgn0003514	sqh	X	6117094	43.7911	44.5316	38.1799	42.1675	41.2725	38.212	37.9455	39.1433	30.6319	38.0954	37.1598	35.2957	32.257	30.3536	36.187	32.9325	31.0543	28.9552	28.4147	29.4747	55.3886	38.2092	42.6425	45.4134	38.1799	43.6278	40.6697	40.8258	36.6163	32.453	41.4851	36.8515	33.6483	29.1957	28.0536	30.2992	42.8659	38.0488	45.205	42.0399	45.8228	34.8121	42.8109	41.1486	0.659109	1
FBgn0003515	st	3L	16490751	3.29618	3.91678	3.18272	3.46523	2.80352	3.48402	2.78713	3.02489	3.40107	2.8442	2.40396	2.88308	3.50357	1.9169	3.75682	3.0591	2.30435	2.13804	2.38572	2.27604	3.20007	3.91757	3.80033	3.63932	3.18272	4.67024	3.14627	3.66641	3.77692	3.1501	4.00127	3.64276	2.85849	2.93379	2.26463	2.68564	4.30615	3.05368	3.90559	3.75514	4.70221	4.25509	4.4792	4.47883	0.865641	1
FBgn0003517	sta	X	1375830	787.08	773.908	746.4	769.129	659.366	728.545	740.287	709.399	750.307	736.15	635.243	707.233	536.357	526.533	592.345	551.745	641.788	667.575	651.549	653.637	939.746	869.036	865.848	891.543	746.4	745.087	771.397	754.295	787.339	646.436	657.094	696.956	1002.16	730.553	665.184	799.299	821.262	800.595	650.381	757.413	904.677	809.735	687.217	800.543	0.598732	1
FBgn0003520	stau	2R	14005401	41.0746	41.5531	42.3075	41.6451	46.5261	47.4962	41.7392	45.2538	37.289	48.7907	42.6812	42.9203	41.1504	36.189	40.1255	39.155	39.0645	38.2653	38.1518	38.4939	44.1688	41.1369	41.288	42.1979	42.3075	44.9507	42.2268	43.1617	39.2186	39.7419	43.7247	40.8951	28.1131	32.2512	32.6526	31.0056	42.3643	34.7756	42.1885	39.7761	34.2604	32.4786	38.8768	35.2053	0.721489	1
FBgn0003525	stg	3R	25077540	0.442083	0.34474	0.611193	0.466005	0.282006	0.669054	0.98125	0.644103	0.88696	0.632427	0.0846349	0.534674	0.57205	0.694154	0.516153	0.594119	0.0345225	0.396172	0.343607	0.258101	0.204842	0.839535	0.254849	0.433075	0.611193	0.803843	0.395604	0.603547	0.52239	0.567415	0.340032	0.476612	0.268366	0.384329	0.113899	0.255531	0.744722	0.367105	0.660009	0.590612	0.224472	0.778994	0.719317	0.574261	1	1
FBgn0003527	stil	2R	8457861	0	0	0.263023	0.0876743	0	0	0	0	0	0	0.218533	0.0728443	0	0	0	0	0	0	0.0985794	0.0328598	0	0	0	0	0.263023	0	0	0.0876743	0.122622	0	0	0.040874	0	0	0	0	0	0	0	0	0	0	0	0	1	1
FBgn0003545	sub	2R	13633000	0	0	0	0	0	0	0	0	0	0	0	0	0	0	0	0	0	0.0968068	0.0932913	0.063366	0	0	0	0	0	0	0.0966679	0.0322226	0	0.0630231	0	0.0210077	0	0	0	0	0.0649917	0	0	0.0216639	0	0	0.0676035	0.0225345	1	1
FBgn0003557	Su(dx)	2L	2037802	16.5954	17.0322	15.7291	16.4522	19.4414	19.0351	19.6147	19.3637	17.9671	18.9656	17.8049	18.2459	17.0426	16.1701	16.7483	16.6537	15.478	16.1629	18.1457	16.5955	17.7006	18.4336	18.6824	18.2722	15.7291	16.3559	20.0623	17.3824	17.8614	17.6468	17.8222	17.7768	15.3965	14.3686	15.57	15.1117	17.5197	16.7531	17.9978	17.4235	16.8134	15.3322	15.1669	15.7708	0.881605	1
FBgn0003559	su(f)	XHet	69195	8.59639	7.53692	11.6567	9.26334	8.75068	7.33704	7.66583	7.91785	5.86701	5.94049	7.91185	6.57312	7.16791	8.79377	7.30318	7.75495	7.11068	5.63928	7.1083	6.61942	5.00333	9.69106	8.10384	7.59941	11.6567	5.7058	6.80966	8.05739	12.6853	10.0911	9.09197	10.6228	7.56013	8.12449	9.51811	8.40091	11.4964	10.5185	10.916	10.977	11.1328	10.0303	8.76433	9.97581	0.689047	1
FBgn0003567	su(Hw)	3R	10130177	7.00704	5.28022	6.86327	6.38351	7.09316	7.56745	5.241	6.63387	5.68965	6.16335	5.98299	5.94533	6.10311	6.55178	7.04235	6.56575	5.95822	6.34805	5.78516	6.03048	5.4061	6.66961	5.91654	5.99742	6.86327	6.84289	5.52804	6.4114	7.21428	5.84497	5.64049	6.23325	4.73396	4.86613	5.98129	5.19379	7.67618	5.1252	6.16911	6.3235	6.10324	5.8229	6.80215	6.24276	0.859103	1
FBgn0003575	su(s)	X	529920	9.28564	9.33286	7.10034	8.57295	8.89231	8.60529	8.48166	8.65975	8.27998	8.72459	8.05889	8.35449	7.69882	6.88809	7.62915	7.40535	7.75611	8.45692	7.88844	8.03382	10.7086	8.88223	8.48538	9.35874	7.10034	9.27775	7.78003	8.05271	7.92083	7.89727	8.10196	7.97335	7.04257	7.92305	7.90368	7.6231	10.0641	7.83316	9.37893	9.09206	9.56944	7.7569	8.71228	8.67954	0.819823	1
FBgn0003598	Su(var)3-7	3R	9090077	5.11684	4.8549	4.59923	4.85699	5.30253	4.91136	4.54881	4.9209	4.23551	5.19248	4.46383	4.63061	4.34253	4.01116	4.32702	4.2269	3.91433	4.01071	4.19663	4.04056	5.03462	5.55167	5.06515	5.21715	4.59923	5.49298	4.51809	4.8701	4.77148	5.06792	4.91455	4.91798	3.58899	3.89604	3.17431	3.55311	4.65149	4.13198	5.80375	4.86241	4.9168	4.42047	4.31819	4.55182	0.89219	1
FBgn0003607	Su(var)205	2L	8209626	35.3631	39.3542	35.7469	36.8214	46.8316	30.3262	37.2028	38.1202	36.6695	38.0775	34.4541	36.4004	34.3605	32.715	31.5506	32.8754	27.5877	29.3102	29.889	28.929	27.7296	32.635	28.557	29.6405	35.7469	30.243	32.7807	32.9235	44.0912	41.9814	36.57	40.8809	27.543	32.0936	33.4562	31.0309	37.3199	33.8655	38.8152	36.6669	33.7975	39.6817	36.5766	36.6853	0.977281	1
FBgn0003612	Su(var)2-10	2R	5003631	15.0842	13.5563	11.3484	13.3296	17.2068	14.2392	14.1629	15.203	12.8387	13.3713	14.4089	13.5396	13.9702	11.1675	12.7938	12.6438	13.1707	10.9111	13.9822	12.688	12.5282	14.2776	12.1011	12.969	11.3484	13.1542	12.9314	12.478	11.5086	12.4374	14.8673	12.9378	10.5879	9.41717	11.0694	10.3582	15.2147	11.6181	12.0787	12.9705	12.4745	11.3474	12.2574	12.0264	0.49289	1
FBgn0003638	su(w[a])	X	906812	35.2023	39.6944	37.0453	37.314	42.4056	48.0758	36.9939	42.4918	33.2372	45.3922	43.2341	40.6212	39.7797	36.7474	37.5096	38.0122	37.1052	38.9011	38.6967	38.2343	48.5871	51.9734	46.5861	49.0489	37.0453	46.7579	42.826	42.2097	37.7272	41.7604	33.8136	37.7671	29.7854	33.5152	32.8686	32.0564	48.9882	36.0121	46.0435	43.6813	35.6681	30.5785	36.5316	34.2594	0.971755	1
FBgn0003651	svp	3R	8084471	22.1318	22.7662	20.9314	21.9431	19.1171	21.7344	20.2391	20.3635	23.3773	20.3152	19.8257	21.1727	21.8356	25.7426	23.5214	23.6999	23.2471	20.7687	22.4484	22.1547	27.2448	21.7864	22.1317	23.721	20.9314	22.8832	25.8918	23.2355	19.8596	19.0911	15.3861	18.1123	18.156	16.4356	18.7044	17.7653	22.5182	21.8908	19.4298	21.2796	21.7836	22.3695	19.834	21.329	0.771702	1
FBgn0003654	sw	X	20099034	16.3864	17.4231	15.6159	16.4751	19.4565	16.2753	18.2471	17.993	19.1556	20.141	15.7414	18.346	16.2195	17.0155	17.1712	16.8021	15.6706	14.9778	16.3593	15.6692	21.0713	17.7658	18.8355	19.2242	15.6159	17.1542	17.8349	16.8683	15.8876	15.1996	14.9019	15.3297	11.072	12.3441	13.5419	12.3193	14.8127	13.7435	17.7776	15.4446	15.6441	14.8024	15.2702	15.2389	0.694375	1
FBgn0003655	swa	X	6257451	0.166737	0	0	0.055579	0	0	0.164485	0.0548283	0	0	0	0	0.215756	0.0581797	0.0486684	0.107535	0.104165	0	0	0.0347217	0	0	0	0	0	0.220494	0	0.073498	0	0	0	0	0.0674785	0	0	0.0224928	0.0802518	0	0	0.0267506	0.423312	0	0	0.141104	1	1
FBgn0003656	sws	X	7850853	36.157	31.0971	33.637	33.6304	36.3795	35.4349	29.3909	33.7351	37.0899	41.9746	39.5928	39.5524	33.5666	32.6984	32.6275	32.9642	41.0865	42.3599	45.6113	43.0192	31.1551	36.075	35.398	34.2094	33.637	37.3976	37.0352	36.0233	34.1925	41.5532	32.8909	36.2122	34.1029	40.6804	44.709	39.8308	36.9612	35.0533	40.0194	37.3446	29.7918	30.3411	28.491	29.5413	0.0501022	0.971709
FBgn0003660	Syb	2R	6136940	92.7814	92.5944	70.0206	85.1321	82.4842	75.8937	76.0137	78.1305	82.8758	84.591	75.9669	81.1446	71.9606	74.2943	79.0702	75.1084	75.6984	72.0966	77.8897	75.2282	78.4203	103.403	89.7111	90.5115	70.0206	72.0888	88.7308	76.9467	71.0466	67.3575	60.7341	66.3794	61.1142	75.141	74.531	70.2621	68.9026	74.9143	70.1474	71.3214	70.2814	71.1197	75.9495	72.4502	0.206457	1
FBgn0003676	T-cp1	3R	18314807	12.5959	14.5864	15.4932	14.2252	12.6483	12.5376	11.3591	12.1817	12.266	12.8612	11.1511	12.0928	17.1366	13.5555	14.3217	15.0046	12.3938	12.7773	11.1294	12.1002	13.5607	18.0918	16.3386	15.997	15.4932	15.3898	16.6792	15.8541	13.3218	13.4278	13.9082	13.5526	16.5679	14.3077	14.1869	15.0208	16.1787	11.6974	15.3235	14.3999	15.7524	12.9732	19.1784	15.968	0.502701	1
FBgn0003683	term	3L	18585403	0	0	0	0	0	0.115836	0	0.038612	0	0.109494	0	0.036498	0	0	0	0	0	0	0	0	0	0.373762	0	0.124587	0	0	0.0821908	0.0273969	0.0986654	0	0.0504608	0.0497087	0.0464632	0	0	0.0154877	0	0	0.0571349	0.019045	0	0	0.0574791	0.0191597	1	1
FBgn0003687	Tbp	2R	17573705	4.40928	6.87677	6.32173	5.86926	3.5419	3.21295	3.62476	3.45987	3.93174	3.27068	5.25241	4.15161	3.48672	4.01727	3.78953	3.76451	2.67807	4.3026	4.65406	3.87824	6.3562	5.58227	3.10668	5.01505	6.32173	4.37314	5.43629	5.37705	4.10504	2.97257	4.8449	3.97417	4.46108	2.76845	2.27203	3.16719	4.48023	4.06828	4.02284	4.19045	3.98018	3.05471	3.31125	3.44871	0.540927	1
FBgn0003701	thr	2R	13748998	0	0	0	0	0.267687	0.0793855	0.155238	0.167437	0.189433	0	0	0.0631443	0.101813	0.0823636	0.137797	0.107325	0	0.0846128	0.02718	0.0372643	0.583324	0.256149	0.0907161	0.310063	0	0.104049	0	0.034683	0.0676181	0.220338	0.0691644	0.11904	0.0318425	0.0684028	0.0405435	0.0469296	0.189351	0.112007	0.156624	0.152661	0.159806	0.0853202	0.19696	0.147362	0.361784	1
FBgn0003710	tipE	3L	4188499	9.87032	10.3993	11.4984	10.5893	10.41	11.5447	9.9489	10.6345	8.34268	10.0673	10.3207	9.57689	11.3125	9.1452	11.9139	10.7905	9.58649	10.1898	12.32	10.6988	12.5524	10.8693	9.54367	10.9885	11.4984	9.0735	9.69084	10.0876	8.77196	9.30089	8.98931	9.02072	5.24035	7.08755	7.20187	6.50992	9.12127	8.10734	11.0472	9.42527	8.44538	6.51078	9.86661	8.27426	0.740895	1
FBgn0003714	tko	X	2336346	8.88084	9.39864	6.62217	8.30055	12.5489	16.4933	12.1245	13.7222	10.6969	17.2277	8.02881	11.9845	15.3095	16.3269	17.1708	16.2691	11.1491	14.3489	11.9815	12.4932	10.3725	12.146	10.0566	10.8584	6.62217	8.64471	6.88001	7.3823	9.73247	14.6451	13.0493	12.4756	12.1811	13.6172	11.8847	12.561	9.97514	7.85163	9.35333	9.06003	11.2398	6.98932	10.5957	9.60827	0.853956	1
FBgn0003715	CG16778	2R	20973303	2.80666	1.87174	2.36996	2.34945	2.06126	2.23805	1.95672	2.08534	1.7649	2.15737	2.439	2.12042	2.30453	1.92136	2.26635	2.16408	1.99535	2.22604	1.92969	2.05036	2.52641	1.73735	2.35709	2.20695	2.36996	2.17618	1.96143	2.16919	1.9473	1.94882	2.05545	1.98386	0.897606	1.50781	2.13732	1.51425	2.47861	2.33083	2.37588	2.39511	1.63857	1.68444	1.74702	1.69001	0.696603	1
FBgn0003716	tkv	2L	5218996	16.0185	15.7237	14.7214	15.4879	16.5073	16.5851	15.6952	16.2625	14.3089	14.2646	17.0681	15.2139	15.0003	12.4926	15.979	14.4906	13.6327	13.9206	13.996	13.8498	12.1025	11.3779	14.9936	12.8247	14.7214	15.3189	12.5608	14.2004	15.7928	16.5118	16.5705	16.2917	11.9578	13.7933	12.5397	12.7636	17.6572	17.5267	20.5026	18.5622	13.7805	15.1807	16.8635	15.2749	0.947917	1
FBgn0003719	tld	3R	20575455	1.10527	1.41038	1.38916	1.3016	1.88015	1.72342	1.48683	1.6968	1.20956	0.862452	0.923345	0.998452	1.10516	1.40241	1.26113	1.25623	0.502176	1.29664	1.00658	0.935132	0.186231	1.09037	1.04263	0.773077	1.38916	1.26231	1.43864	1.36337	0.949856	1.3131	1.58985	1.28427	1.66722	1.79073	1.29439	1.58411	1.2574	1.5734	1.20009	1.34363	2.24485	1.47092	1.55945	1.75841	0.0636191	1
FBgn0003720	tll	3R	26678037	0	0	0	0	0	0	0	0	0	0	0	0	0	0	0	0	0	0	0.0601243	0.0200414	0	0.377747	0	0.125916	0	0	0	0	0	0	0	0	0	0	0	0	0	0	0	0	0	0	0	0	1	1
FBgn0003721	Tm1	3R	11107254	109.054	106.978	109.922	108.651	123.972	113.331	126.189	121.164	106.383	101.108	94.6901	100.727	123.076	106.145	110.76	113.327	97.2923	100.656	94.8025	97.5836	124.128	120.902	125.095	123.375	109.922	122.03	106.401	112.784	106.936	111.276	118.87	112.361	59.922	78.6584	69.3093	69.2966	102.767	102.288	115.853	106.969	89.6809	86.3865	108.342	94.8031	0.0388282	0.896045
FBgn0003731	Egfr	2R	17410510	34.2605	32.9418	30.7806	32.661	28.5379	31.1175	29.9522	29.8692	31.9288	30.3258	32.3271	31.5272	27.2252	28.3977	27.5033	27.7087	30.4883	30.4282	26.5861	29.1675	36.4552	38.9618	36.6137	37.3436	30.7806	34.3426	33.7176	32.9469	33.3504	36.241	28.285	32.6255	43.6125	37.2775	43.0067	41.2989	30.7176	36.5441	35.8779	34.3799	35.0411	36.2716	36.5155	35.9427	0.167636	1
FBgn0003732	Top2	2L	19447365	8.8172	8.90112	9.76463	9.16098	10.5805	9.79254	10.1141	10.1624	9.32503	11.0709	8.84573	9.74722	8.82235	9.12539	7.36177	8.4365	8.61677	7.8717	8.4459	8.31146	9.88122	8.75798	10.5598	9.733	9.76463	9.04768	9.49269	9.435	9.091	9.54318	9.4788	9.37099	6.1753	7.87634	7.68488	7.24551	9.80346	7.0104	10.2548	9.02289	7.91287	8.64008	10.412	8.98832	0.922668	1
FBgn0003733	tor	2R	3590680	0	0.0865051	0.102244	0.0629164	0	0	0	0	0	0	0	0	0	0	0	0	0.0346508	0	0.0766496	0.0371001	0	0	0	0	0.102244	0.0708173	0	0.0576871	0	0	0	0	0	0	0	0	0	0	0	0	0.0563264	0	0	0.0187755	1	1
FBgn0003741	tra	3L	16583159	9.74822	14.7031	10.4199	11.6237	14.5065	9.85573	10.1435	11.5019	12.6125	11.5668	8.52021	10.8998	9.48147	9.71759	6.75317	8.65074	8.18234	8.12695	11.8799	9.3964	6.84789	9.01586	8.59121	8.15165	10.4199	7.52934	8.58867	8.84597	7.80031	9.35903	8.88754	8.68229	7.60144	7.82843	8.85868	8.09618	10.4031	7.26106	8.38069	8.68162	8.4656	8.66058	7.08421	8.07013	1	1
FBgn0003742	tra2	2R	10489509	7.21936	8.46053	7.23778	7.63922	7.34411	7.72861	7.61497	7.56256	5.98501	7.60453	7.72668	7.10541	9.22597	6.97294	7.00588	7.73493	6.78042	6.92024	7.53906	7.07991	4.94374	11.0722	7.52171	7.84588	7.23778	8.7451	7.00556	7.66281	9.67436	8.11119	8.99744	8.92766	6.67804	7.25847	6.54364	6.82672	8.42086	8.40865	8.86752	8.56568	9.21047	7.66376	9.60824	8.82749	0.845518	1
FBgn0003744	trc	3L	19823964	17.0804	18.0529	19.9682	18.3672	20.6183	18.0855	19.0534	19.2524	13.2112	20.9367	21.7148	18.6209	17.7157	16.9131	18.263	17.6306	17.6653	17.7198	18.3801	17.9217	17.1252	17.2305	19.6808	18.0122	19.9682	18.4286	19.9117	19.4362	20.8138	18.3797	21.0017	20.0651	14.4036	16.0263	13.5985	14.6761	19.4022	16.8642	19.8681	18.7115	20.7269	16.4577	18.4186	18.5344	0.966073	1
FBgn0003747	Gr5a	X	5574650	0	0.176534	0.417307	0.197947	0.385092	0	0	0.128364	0	0.215902	0	0.0719673	0.219702	0.315967	0.132156	0.222608	0.21214	0.0811488	0.0782019	0.12383	0.839165	0.491325	0.522013	0.617501	0.417307	0.149685	0.324129	0.29704	0.19455	0.105659	0.198998	0.166402	0.27485	0.492018	0.233302	0.33339	0.871674	0.214842	0.788615	0.625044	0.229895	0.245482	0.340014	0.271797	1	1
FBgn0003748	Treh	2R	16961523	82.4112	85.4468	79.6398	82.4993	111.015	107.974	107.552	108.847	117.81	139.493	130.407	129.237	73.5868	70.2825	81.3637	75.0777	98.255	121.743	103.25	107.749	63.5233	58.1902	53.3526	58.3554	79.6398	63.2255	61.4377	68.101	153.024	140.523	111.2	134.916	152.021	148.557	134.917	145.165	142.144	112.447	87.1389	113.91	107.053	69.6149	48.1951	74.9543	0.00353053	0.210516
FBgn0003751	trk	2L	10271443	0.764874	2.68404	1.05746	1.50212	2.27694	1.54343	0.754541	1.52497	0.306916	0.729466	0	0.345461	1.11345	0.66722	1.33954	1.04007	0.477836	0.411264	1.05688	0.64866	1.41764	0.415008	0.44093	0.757859	1.05746	0.505737	0.273783	0.612327	0.328661	0.178494	1.68088	0.729345	1.0834	0.332475	0.985318	0.800398	0.920348	0.181471	0.38064	0.494153	0.388372	1.03676	0.765866	0.730333	0.027745	0.774095
FBgn0003861	trp	3R	25740243	211.798	251.675	255.37	239.614	301.226	254.07	256.083	270.46	212.657	299.273	290.421	267.45	238.724	182.284	275.325	232.111	279.413	296.503	241.985	272.634	313.573	289.052	294.807	299.144	255.37	299.279	278.981	277.877	296.11	324.712	334.358	318.393	244.989	252.927	254.841	250.919	293.798	290.663	330.206	304.889	239.797	231.517	295.845	255.72	0.734464	1
FBgn0003862	trx	3R	10089080	14.3597	13.6135	14.6863	14.2198	15.0821	16.1828	15.6022	15.6224	11.1423	14.3209	12.6558	12.7063	14.4273	14.2467	13.2834	13.9858	13.2997	13.872	13.6007	13.5908	12.7974	13.5229	14.3669	13.5624	14.6863	13.8504	15.1439	14.5602	11.8921	14.0052	15.4938	13.797	8.57555	10.5911	11.0345	10.0671	15.5224	13.8385	16.8673	15.4094	11.7993	12.8985	12.8845	12.5274	0.0194638	0.634577
FBgn0003863	alphaTry	2R	7231765	0	0	0.144602	0.0482007	0	0	0	0	0	0	0	0	0	0	0	0	0	0	0	0	0	0	0.452209	0.150736	0.144602	0	0	0.0482007	0	0	0	0	0.0317463	0	0	0.0105821	0.188778	0	0.195189	0.127989	0	0	0	0	1	1
FBgn0003865	tsg	X	11882095	0	0	0	0	0	0	0	0	0	0	0	0	0	0	0	0	0	0	0	0	0	0	0	0	0	0	0	0	0	0	0	0	0	0	0	0	0	0	0	0	0	0	0	0	1	1
FBgn0003866	tsh	2L	21828593	2.0672	1.55643	1.51111	1.71158	1.87948	1.86992	1.40639	1.7186	2.00222	1.69957	1.2555	1.65243	1.40664	1.49236	1.22758	1.37553	1.38049	1.40536	1.45282	1.41289	1.5854	2.08855	1.23278	1.63558	1.51111	1.97956	1.47989	1.65685	1.62337	1.56367	1.91113	1.69939	0.778897	1.33236	1.35904	1.15677	2.19576	1.99565	1.52538	1.9056	1.37539	1.2754	1.82007	1.49029	1	1
FBgn0003867	tsl	3R	17603836	35.6867	31.6539	30.4595	32.6	25.9402	33.39	29.7379	29.6894	30.1243	29.6792	30.0623	29.9553	25.9716	26.3235	30.6185	27.6379	30.3612	28.4249	28.5456	29.1106	31.4189	31.6427	34.6838	32.5818	30.4595	34.78	40.5578	35.2658	41.0412	42.8896	33.2303	39.0537	43.8702	40.8608	44.6376	43.1229	45.9371	44.7451	40.5409	43.741	50.5415	42.341	35.5246	42.8024	0.528294	1
FBgn0003870	ttk	3R	27539591	23.1351	21.5758	21.7163	22.1424	20.7569	22.9152	22.1261	21.9327	18.3349	20.9981	18.7738	19.3689	23.3735	21.3101	19.6929	21.4588	20.3607	19.7779	20.5643	20.2343	23.0725	17.1073	19.099	19.7596	21.7163	22.2425	22.6368	22.1985	16.1823	17.6392	18.3727	17.3981	13.087	15.2388	15.2583	14.528	20.9514	18.0616	21.3753	20.1294	16.4226	17.7158	20.0798	18.0727	0.274636	1
FBgn0003882	tub	3R	212967	16.9409	16.873	14.8413	16.2184	13.6956	14.7232	13.0718	13.8302	15.2109	12.7974	14.386	14.1314	13.0769	14.6335	15.1281	14.2795	14.5129	13.7105	12.1678	13.4637	14.9222	11.6491	14.8907	13.8207	14.8413	17.9666	12.9684	15.2588	17.4474	15.1913	14.7443	15.7943	14.3283	14.9506	14.0065	14.4285	16.7202	16.4753	15.3589	16.1848	16.8632	13.6413	15.7873	15.4306	0.490662	1
FBgn0003884	alphaTub84B	3R	2912260	233.537	236.312	246.834	238.894	227.861	239.801	220.126	229.263	185.875	229.152	215.918	210.315	177.318	170.03	187.837	178.395	151.97	163.907	167.199	161.025	274.229	257.814	255.382	262.475	246.834	233.469	244.095	241.466	206.489	182.323	195.345	194.719	204.062	170.389	150.546	174.999	207.987	215.192	215.529	212.903	230.904	255.797	276.733	254.478	0.466278	1
FBgn0003885	alphaTub84D	3R	3356478	25.4219	28.3393	25.1608	26.3073	25.0325	30.5553	26.5933	27.3937	26.4265	25.0587	23.714	25.0664	26.4379	24.4087	29.258	26.7015	21.8507	25.9315	21.9839	23.2554	24.8237	31.4751	27.8348	28.0445	25.1608	29.3312	26.505	26.999	28.5187	24.2877	25.4589	26.0884	25.7551	23.3615	20.7042	23.2736	26.5655	23.7617	25.0053	25.1108	26.9426	27.243	25.7966	26.6607	0.485218	1
FBgn0003886	alphaTub85E	3R	5556943	0	0.167007	0	0.055669	0	0	0.211272	0.070424	0	0.408501	0	0.136167	0.0692816	0	0	0.0230939	0	0.0767694	0	0.0255898	0	0	0	0	0	0	0.306637	0.102212	0	0	0	0	0	0	0	0	0.103079	0	0.106579	0.069886	0	0.116117	0	0.0387057	1	1
FBgn0003887	betaTub56D	2R	15334824	140.901	143.341	132.371	138.871	135.044	151.026	132.235	139.435	134.224	138.968	123.628	132.273	110.945	100.082	123.043	111.357	94.7418	106.351	101.712	100.935	155.422	145.689	146.832	149.314	132.371	135.643	136.797	134.937	111.112	104.702	100.552	105.455	120.323	88.2534	94.5856	101.054	105.058	115.975	109.768	110.267	121.582	140.253	147.816	136.55	0.826534	1
FBgn0003888	betaTub60D	2R	20193405	8.42939	11.1642	10.359	9.9842	12.9734	10.5297	10.6914	11.3982	7.51647	7.78396	9.6314	8.31061	9.00303	10.2244	8.74819	9.32521	7.06319	8.15351	7.62631	7.61434	14.8793	12.1964	17.4319	14.8359	10.359	7.9622	14.8468	11.056	11.671	6.24482	7.35094	8.42225	6.552	4.6528	6.89449	6.0331	9.72422	7.93621	9.58832	9.08292	10.2247	9.06803	8.06074	9.11782	0.0199243	0.640902
FBgn0003889	betaTub85D	3R	5234105	0.366442	0.142877	0	0.169773	0.311672	0.184859	0.361491	0.286007	0.294079	0.524217	0	0.272765	0.177814	0	0.10696	0.0949247	0.114463	0.197032	0.253169	0.188221	0	0.397651	0	0.13255	0	0.121146	0.393498	0.171548	0.0787286	0.0855143	0.161058	0.108434	0.148299	0.159284	0	0.102528	0.352742	0.0869406	0.0911799	0.176954	0.372128	0	0.183459	0.185196	1	1
FBgn0003890	betaTub97EF	3R	23792730	39.9858	40.4013	39.5424	39.9765	42.2761	40.0145	35.3698	39.2201	32.3412	32.4751	29.1438	31.32	29.4391	27.3023	31.6654	29.4689	24.6377	25.204	23.3392	24.3936	36.1311	45.7905	40.792	40.9045	39.5424	38.8649	39.0033	39.1369	44.7197	38.9181	29.9593	37.8657	44.7406	30.4115	33.534	36.2287	43.7255	46.1203	36.236	42.0273	51.4589	50.3495	53.7398	51.8494	0.0143269	0.538788
FBgn0003891	tud	2R	17070937	46.0024	47.8627	48.8412	47.5688	44.7911	42.7221	42.7854	43.4329	35.3015	41.3635	39.6982	38.7877	36.7851	33.007	35.1707	34.9876	34.8769	37.3714	33.4438	35.2307	45.4121	43.8531	43.6061	44.2904	48.8412	49.7978	48.5307	49.0566	42.5368	43.9965	49.2011	45.2448	28.7492	34.8996	38.5539	34.0676	52.2367	46.8566	59.1252	52.7395	46.3822	44.5118	47.8938	46.2626	0.239638	1
FBgn0003892	ptc	2R	4537140	1.34071	1.2831	1.0672	1.23034	1.29582	1.22972	1.50295	1.34283	1.17377	0.871801	0.980022	1.00853	1.28143	1.08448	1.12064	1.16218	0.970822	0.961177	1.32625	1.08608	0.790649	1.32263	1.33498	1.14942	1.0672	0.926773	1.35244	1.11547	1.17837	1.36526	1.36602	1.30322	0.8632	0.635756	1.09907	0.866009	1.37858	1.38803	1.33441	1.36701	1.17585	0.958199	1.03734	1.05713	0.326917	1
FBgn0003896	tup	2L	18859500	3.5617	4.12491	5.18475	4.29045	4.78449	4.83475	3.6995	4.43958	5.01603	4.36563	5.37589	4.91918	5.12229	3.7269	5.19879	4.68266	3.91536	4.65819	4.02396	4.19917	5.59911	4.63477	3.3629	4.53226	5.18475	5.30931	3.71392	4.73599	3.62571	3.06305	4.44838	3.71238	2.36086	2.56456	2.34074	2.42205	4.71481	3.46016	3.99176	4.05558	3.17366	3.73268	3.54643	3.48426	0.260091	1
FBgn0003900	twi	2R	18933631	0	0	0	0	0	0	0.176984	0.0589947	0.431958	0	0.137387	0.189782	0.0580377	0	0.0523667	0.0368015	0.224173	0	0	0.0747243	0	0	0	0	0	0	0.128436	0.042812	0.154186	0	0	0.0513953	0	0.0779847	0.0924458	0.0568102	0.0863501	0.170268	0.178571	0.145063	0	0.097272	0	0.032424	0.388602	1
FBgn0003916	snRNA:U1:21D	2L	901491	15.2543	20.0485	24.644	19.9823	22.3043	18.5035	16.0628	18.9569	18.2943	15.202	27.6944	20.3969	15.8244	19.8555	17.3099	17.6633	28.1074	20.0291	29.5447	25.8937	3.49439	9.67172	6.32358	6.49656	24.644	8.95293	7.73019	13.7757	12.8148	12.6393	11.9778	12.4773	17.5492	10.9519	7.86032	12.1205	14.519	19.4379	15.865	16.6073	13.0543	12.3595	22.9112	16.1083	0.533743	1
FBgn0003920	snRNA:U2:14B	X	16148705	7.26152	8.26555	9.58048	8.36918	13.4232	16.2482	15.3956	15.0223	21.3129	21.558	21.6376	21.5028	18.5369	14.8859	15.1274	16.1834	23.2951	12.1751	18.5402	18.0035	6.94642	16.3001	11.748	11.6648	9.58048	11.3838	9.24402	10.0694	17.7274	13.01	16.6013	15.7796	9.74048	10.9711	8.05683	9.58947	10.2455	15.1443	9.95225	11.7807	10.3328	10.9699	11.6687	10.9905	0.00352237	0.210516
FBgn0003922	snRNA:U2:38ABa	2L	19815614	7.26152	8.26555	9.58048	8.36918	13.4232	16.2482	15.3956	15.0223	21.3129	21.558	21.6376	21.5028	18.5369	14.8859	15.1274	16.1834	23.2951	12.1751	18.5402	18.0035	6.94642	16.3001	11.748	11.6648	9.58048	11.3838	8.61517	9.85982	17.35	13.42	16.6013	15.7904	9.74048	10.9711	8.05683	9.58947	9.39991	15.1443	9.95225	11.4988	10.3328	10.9699	11.6687	10.9905	0.00351751	0.210516
FBgn0003923	snRNA:U2:38ABb	2L	19812646	0.588673	2.06573	1.49207	1.38216	7.38514	3.86059	1.30662	4.18412	6.96829	7.29848	5.52224	6.59634	5.76062	3.95406	3.00695	4.24054	6.75756	2.32117	2.89777	3.99217	1.09106	1.43732	0	0.842793	1.49207	0.233539	0.948206	0.891272	2.97214	2.06063	2.71669	2.58315	3.69265	2.94266	0.758334	2.46455	1.0625	0.698331	0.219715	0.660182	0.224178	0.239377	0.294718	0.252758	0.0304126	0.804268
FBgn0003926	snRNA:U3:22A	2L	1432711	0	0	0	0	0	0	0	0	0	0	0	0	0	0	0	0	0	0	0	0	0	0	0	0	0	0	0	0	0	0	0	0	0	0	0	0	0	0	0	0	0	0	0	0	1	1
FBgn0003930	snRNA:U4:39B	2L	21215036	4.71762	9.19707	5.4352	6.44996	15.0469	4.7598	6.98083	8.92918	15.1441	8.99845	1.80633	8.64963	4.95993	7.81907	5.50804	6.09568	9.94684	6.34153	8.96314	8.41717	4.37187	2.5597	2.71958	3.21705	5.4352	0.779825	3.37729	3.19744	2.53391	5.50461	9.84903	5.96252	6.68226	2.05065	1.82318	3.5187	6.81186	6.15606	7.6301	6.86601	5.38968	12.1496	6.49514	8.01147	1	1
FBgn0003931	snRNA:U4:38AB	2L	19810734	0	1.85237	3.28409	1.71215	1.01019	0	0	0.33673	1.90634	0	0	0.635447	2.68954	0.414428	1.38671	1.49689	1.11299	0.425746	1.64114	1.05996	0	0	0	0	3.28409	0.785317	1.70054	1.92332	1.53105	0	1.56606	1.03237	0	1.03254	0.612008	0.548183	2.28661	0.563583	0.591064	1.14709	0.60307	0.643957	0.594625	0.613884	1	1
FBgn0003933	snRNA:U5:14B	X	16148041	0	0	2.8263	0.9421	0.869375	0	0	0.289792	0	0	0.782745	0.260915	0	0	0.820469	0.27349	0.319281	0.366399	0	0.22856	0	0	0	0	2.8263	0	0	0.9421	0	0	1.34776	0.449253	0	0.33323	0	0.111077	0	0.485023	0	0.161674	0	0	0	0	1	1
FBgn0003934	snRNA:U5:23D	2L	3048701	0	0	0	0	0.73001	0	0	0.243337	0	0	0.657267	0.219089	0	0	0.688943	0.229648	0.268099	0.307663	0	0.191921	0	0	0	0	0	0	0	0	0	0	0	0	0	0.279812	0	0.0932707	0	0.407271	0	0.135757	0	0	0	0	1	1
FBgn0003935	snRNA:U5:34A	2L	13244848	0	0	0	0	0	0	0	0	0.710499	0	0.677968	0.462822	0.859201	3.39809	0.258415	1.50524	0.276543	0	3.05829	1.11161	0	0.960728	0	0.320243	0	0	0	0	0.760837	0.413207	0	0.391348	0	0	0	0	1.27834	1.2603	0.440583	0.993074	0	0.48001	0.886475	0.455495	0.506176	1
FBgn0003936	snRNA:U5:35D	2L	15751557	0	0	0	0	0	0	0	0	0.716138	0	0.683349	0.466496	0.86602	1.55685	0.260466	0.894445	0.278738	0	0.308256	0.195665	0	0.968353	0	0.322784	0	0	0	0	0.766875	0.416486	0	0.394454	0	0	0	0	0	0	0.44408	0.148027	1.3593	0.48382	0.893511	0.91221	0.506103	1
FBgn0003938	snRNA:U5:63BC	3L	3090801	0	6.41552	0	2.13851	2.33247	0	0	0.77749	2.93442	2.6154	4.90011	3.48331	0.887142	1.59482	0.266819	0.91626	1.99875	0	3.15775	1.71883	0	0.991971	0	0.330657	0	1.81325	1.96322	1.25882	0.785579	0.426644	1.20532	0.805848	0	2.38409	0	0.794697	0	0	1.81965	0.60655	2.78491	1.98248	2.28826	2.35188	0.226549	1
FBgn0003941	RpL40	2L	4227642	757.924	737.697	718.823	738.148	647.685	710.043	645.339	667.689	735.812	686.282	681.379	701.158	554.851	558.529	606.848	573.409	671.927	651.458	663.286	662.224	743.583	744.276	754.82	747.56	718.823	660.642	707.233	695.566	833.402	717.03	710.72	753.717	1031.37	822.412	701.034	851.605	866.847	886.864	682.894	812.202	947.705	809.954	778.098	845.252	0.186412	1
FBgn0003942	RpS27A	2L	10408352	1442.11	1394.71	1255.13	1363.98	1181.5	1239.43	1273.12	1231.35	1459.59	1258.52	1190.74	1302.95	989.439	1098.64	1134.91	1074.33	1223.24	1159.28	1261.65	1214.72	1328.5	1335.54	1347.35	1337.13	1255.13	1273	1243.69	1257.27	1553.69	1366.63	1195.05	1371.79	1630.84	1573.95	1454.19	1552.99	1625.96	1515.41	1270.03	1470.47	1782.15	1630.51	1434.85	1615.84	0.217182	1
FBgn0003943	Ubi-p63E	3L	3899259	153.209	158.181	160.67	157.353	165.76	144.976	151.445	154.06	141.021	156.692	146.778	148.164	143.979	142.098	149.972	145.35	145.91	143.123	146.108	145.047	141.349	138.924	144.883	141.719	160.67	152.916	139.299	150.962	163.587	194.214	202.666	186.822	132.524	146.888	161.427	146.946	158.25	171.398	208.526	179.391	151.105	153.28	193.29	165.892	0.86762	1
FBgn0003944	Ubx	3R	12482345	0	0.0687101	0.0812113	0.0499738	0.0961371	0	0	0.0320457	0.0617575	0.221162	0.237481	0.173467	0.0747196	0.107466	0.134854	0.10568	0.0962032	0.246942	0	0.114382	0	0	0	0	0.0812113	0.050882	0.0809178	0.0710037	0.113588	0	0.101518	0.071702	0	0.0334501	0	0.01115	0.0848195	0.109601	0.112504	0.102308	0.0781767	0	0.044113	0.0407632	0.0442646	0.935522
FBgn0003950	unc	X	20982441	0	0.0590562	0.069801	0.0429524	0.193238	0.229227	0.149417	0.190627	0.0607769	0.216678	0.0579941	0.111816	0.048998	0.0792754	0.110526	0.0795998	0.0946231	0.0814403	0.0261609	0.0674081	0	0	0	0	0.069801	0	0.0542156	0.0413389	0.0976242	0.0706923	0.133142	0.100486	0.0612972	0.032919	0.0390234	0.0444132	0.109351	0.107807	0.075376	0.0975113	0.076907	0.123182	0.113745	0.104611	0.591838	1
FBgn0003961	Uro	2L	7780085	0	0	0	0	0	0	0	0	0	0	0	0	0	0	0	0	0	0	0	0	0	0	0	0	0	0	0	0	0	0	0	0	0	0	0	0	0	0	0	0	0	0	0	0	1	1
FBgn0003963	ush	2L	490835	3.0726	3.15362	2.97234	3.06619	2.76622	3.53578	3.3828	3.22827	3.11265	4.21095	3.31233	3.54531	3.43571	3.05171	3.3027	3.26337	3.12166	3.06168	2.39912	2.86082	4.54125	3.54504	3.32695	3.80441	2.97234	3.89867	2.91021	3.26041	2.51767	3.46653	3.53834	3.17418	2.61781	2.94713	2.53723	2.70072	2.75858	3.21961	2.95282	2.977	3.14689	3.59266	2.74997	3.16317	0.0840143	1
FBgn0003964	usp	X	1932831	14.7581	13.0734	10.6309	12.8208	14.3732	11.908	13.4953	13.2588	14.5306	16.8877	12.0166	14.4783	10.8534	10.3904	12.5298	11.2579	10.4315	11.3975	12.9725	11.6005	9.69461	12.08	10.9789	10.9178	10.6309	9.84576	10.8496	10.4421	10.3798	11.5852	9.96219	10.6424	10.2585	9.67759	9.88265	9.93958	10.929	9.42629	10.8236	10.393	11.5237	9.96227	10.5434	10.6765	0.303574	1
FBgn0003965	v	X	10818005	37.7373	35.6762	35.7349	36.3828	29.6787	35.4669	35.9526	33.6994	12.2386	12.3255	18.408	14.324	36.6237	43.3813	39.9106	39.9719	18.8119	19.9203	14.7325	17.8216	64.1945	51.3294	51.2573	55.5937	35.7349	55.202	50.5158	47.1509	52.7557	43.7914	30.3324	42.2932	30.0215	26.5154	28.2358	28.2576	62.576	52.8619	42.7052	52.7144	73.496	57.5979	50.7268	60.6069	2.24423e-12	1.95522e-09
FBgn0003969	vap	X	15894167	8.73367	9.05776	7.61245	8.46796	8.64894	10.7702	10.7926	10.0706	7.66617	9.99594	8.41853	8.69355	7.49184	7.49159	8.45938	7.81427	7.85116	7.97013	7.02993	7.61707	8.27232	11.2104	8.16918	9.2173	7.61245	9.76989	8.19393	8.52542	9.17237	9.50143	11.33	10.0013	6.66401	8.83391	8.32328	7.9404	11.4522	8.4804	10.5703	10.1676	9.62639	7.47854	10.7199	9.27494	0.143704	1
FBgn0003975	vg	2R	8771706	0.518539	0.336967	0.716895	0.524134	0.73506	0.959154	0.426278	0.706831	0.208071	0.494534	0.463269	0.388625	0.503237	0.361868	0.529741	0.464949	0.620893	0.929375	0.35825	0.636173	0.640715	0.937836	0.498207	0.692253	0.716895	0.857148	1.17552	0.916521	0.48276	0.322689	0.151938	0.319129	0.314779	0.488362	0.311727	0.371623	0.41596	0.410089	0.559111	0.46172	0.438821	0.140572	0.822085	0.467159	0.103972	1
FBgn0003977	vir	2R	19247786	3.55374	3.04836	2.83871	3.14694	2.97221	2.56962	2.39559	2.64581	2.18652	3.27626	3.22032	2.89437	2.64414	2.35602	2.36848	2.45621	2.55313	3.12099	2.312	2.66204	3.40307	3.34222	2.52666	3.09065	2.83871	2.74137	2.7985	2.79286	2.85043	2.4603	3.80071	3.03715	3.21198	2.75478	2.86886	2.94521	3.27834	3.09154	3.7139	3.36126	2.73674	2.98652	3.32113	3.0148	0.473867	1
FBgn0003978	vls	2L	20064261	1.78606	1.19381	1.17585	1.38524	1.73612	3.34662	1.25852	2.11375	2.86672	4.62345	1.9539	3.14802	2.39367	1.42448	2.45768	2.09194	1.35489	2.56091	1.67466	1.86349	5.20193	3.59946	1.1767	3.32603	1.17585	2.86801	2.19192	2.07859	2.52164	2.26264	2.69145	2.49191	2.788	1.77454	2.1036	2.22205	2.45612	1.81608	2.53952	2.27057	1.68422	1.7984	1.66063	1.71442	0.204187	1
FBgn0003979	Vm26Aa	2L	5959700	0	0	0	0	0	0	0	0	0	0	0	0	0.170227	0	0	0.0567423	0	0	0	0	0	0	0	0	0	0	0	0	0	0	0	0	0	0	0	0	0	0	0	0	0	0	0	0	1	1
FBgn0003980	Vm26Ab	2L	5957004	0	0	0	0	0	0	0	0	0	0	0.413289	0.137763	0	0	0	0	0	0	0	0	0	0	0.62224	0.207413	0	0	0	0	0	0	0	0	0	0	0	0	0.259759	0	0	0.0865863	0	0	0	0	1	1
FBgn0003983	Vm34Ca	2L	13411141	0	0	0	0	0	0	0	0	0	0	0	0	0.229241	0.247264	0	0.158835	0	0	0	0	0	0	0	0	0	0	0	0	0	0	0	0	0	0	0	0	0	0	0	0	0	0	0	0	1	1
FBgn0003984	vn	3L	5806438	2.97511	3.50579	4.28121	3.58737	4.82232	4.4026	5.29534	4.84009	3.44876	3.46792	4.4553	3.79066	4.88244	3.92172	5.18028	4.66148	4.98604	3.93402	4.02086	4.31364	3.70713	3.80253	2.70345	3.40437	4.28121	5.28199	4.49321	4.68547	2.71892	3.23997	3.02206	2.99365	2.43912	2.83828	2.35063	2.54268	3.15038	3.1999	3.09272	3.14767	3.18914	2.87417	4.17055	3.41129	0.210174	1
FBgn0003996	w	X	2684632	2.29462	2.90771	2.77583	2.65939	3.04947	2.31514	2.4051	2.5899	3.10753	2.32517	2.63577	2.68949	2.41248	2.95245	2.63722	2.66738	2.59823	3.23871	2.08073	2.63922	1.86065	3.8907	1.32279	2.35805	2.77583	2.08616	2.36138	2.40779	2.46496	2.40967	2.39526	2.4233	2.08942	1.62081	1.92137	1.8772	2.41591	2.24571	1.99836	2.21999	2.33023	1.39962	2.5848	2.10488	0.791957	1
FBgn0003997	W	3L	18160842	6.61529	5.56095	5.88161	6.01928	6.4918	4.91182	7.20176	6.20179	6.58044	6.38067	5.71737	6.22616	6.59435	7.44147	6.96694	7.00092	5.70558	5.11765	6.06746	5.63023	6.41074	7.40304	6.06946	6.62775	5.88161	6.96431	6.83996	6.56196	5.11849	5.67712	6.82129	5.8723	3.37569	2.8442	3.89031	3.37007	8.59997	5.6922	5.88626	6.72614	6.00585	6.45854	4.84506	5.76982	1	1
FBgn0004003	wbl	2R	15137266	6.03607	3.32256	3.27256	4.2104	3.32193	5.37356	5.95452	4.88334	5.414	5.07939	4.62231	5.03857	5.9728	5.20347	3.5237	4.89999	5.98904	2.92734	5.02879	4.64839	5.92274	5.39423	0.818737	4.04524	3.27256	4.93014	4.32116	4.17462	3.81419	5.30297	3.74536	4.28751	5.89144	4.78449	4.20804	4.96132	4.44324	3.03267	4.06403	3.84665	5.2283	5.00524	4.44404	4.89253	0.85186	1
FBgn0004009	wg	2L	7307161	0.693815	0.360694	1.17238	0.742296	1.8687	1.63338	1.36888	1.62365	0.928009	0.771979	1.23973	0.979906	1.30927	0.968372	1.3501	1.20925	0.975247	0.994817	1.03858	1.00288	1.50026	0.878389	0.799931	1.05953	1.17238	0.764587	0.993389	0.976785	0.844693	1.02544	1.16895	1.01303	0.701966	0.703702	1.37046	0.925376	1.11313	0.87793	0.748101	0.913054	0.528436	0.877743	1.15786	0.85468	0.0697225	1
FBgn0004028	wupA	X	17999586	131.536	131.467	110.882	124.628	135.206	133.914	149.29	139.47	101.404	94.5814	102.959	99.6481	125.867	113.334	117.116	118.772	96.3789	93.4584	89.8134	93.2169	125.073	113.063	114.219	117.452	110.882	135.19	124.808	123.627	108.659	114.76	128.405	117.275	50.0094	68.63	69.6642	62.7679	94.686	108.026	113.167	105.293	84.7437	90.0053	110.734	95.161	0.000434835	0.0448624
FBgn0004034	y	X	250542	0	0	0	0	0.140772	0.16699	0.489822	0.265861	0.132826	0	0	0.0442753	0.107084	0.231006	0.193241	0.17711	0.103398	0.296643	0.228696	0.209579	0	0	0	0	0	0	0.236974	0.0789913	0	0.386241	0.14549	0.177244	0	0.215831	0.0852847	0.100372	0.238983	0.23561	0.164732	0.213108	0.168078	0.089737	0.0828624	0.113559	0.2294	1
FBgn0004045	Yp1	X	9947885	27784.2	25406.6	22527.9	25239.6	20848.6	24695.9	23294.2	22946.2	25678.1	21963.3	21957	23199.5	27692.5	31475.2	32078.9	30415.5	27044.3	28043.8	25541.5	26876.5	38691.9	34074.1	33593.3	35453.1	22527.9	30328.7	34569.7	29142.1	29313.2	28136.6	18017.8	25155.9	38578.8	31100.5	32358	34012.4	23417.7	27913.2	20547.3	23959.4	24914.4	25130.7	21050.4	23698.5	0.480995	1
FBgn0004047	Yp3	X	13653578	24216.3	23257.1	20158.2	22543.9	18018.4	22754.7	20735.3	20502.8	30189.3	25100.4	24730.4	26673.4	23608.1	26574.4	27108.5	25763.7	29617.7	30166.4	27345.4	29043.2	33619.4	28683.2	27869.2	30057.3	20158.2	26105	30783	25682.1	28407.3	25771.8	18771.3	24316.8	52788.5	39419.9	40483.8	44230.7	22563.3	27732.2	20070.6	23455.4	26416.1	25680.9	20902.2	24333.1	7.95324e-05	0.0106601
FBgn0004049	yrt	3R	9254589	11.1995	10.6698	9.2466	10.372	10.2293	9.14394	7.87038	9.08121	9.04477	9.5363	8.82731	9.13613	10.4425	7.4522	9.41848	9.10439	9.17944	9.10536	7.93465	8.73982	9.52031	7.45242	10.523	9.16524	9.2466	8.30895	9.79591	9.11715	7.58777	8.7264	8.48535	8.26651	5.60442	6.83444	6.45485	6.2979	8.39343	8.19334	9.90941	8.83206	6.03699	7.10313	9.76801	7.63604	0.535014	1
FBgn0004050	z	X	2341802	8.58043	9.21394	7.64917	8.48118	8.85327	9.08291	9.71338	9.21652	8.01488	10.3296	7.22237	8.52228	7.82381	5.69346	7.63655	7.05127	7.29367	7.8154	8.89035	7.99981	8.08195	8.39534	9.40626	8.62785	7.64917	8.83563	8.35801	8.28094	7.85743	7.5499	8.71718	8.0415	8.42507	6.54231	7.10317	7.35685	8.19193	7.54233	7.91011	7.88146	9.85634	7.31849	9.20254	8.79246	1	1
FBgn0004052	Z600	3L	15502161	0	0	0	0	0	0	0	0	0	0	0	0	0	0	0	0	0	0	0.25722	0.08574	0	0	0	0	0	0	0	0	0	0	0	0	0	0	0	0	0	0	0	0	0	0	0	0	1	1
FBgn0004053	zen	3R	2578586	0	0	0	0	0	0	0	0	0	0	0	0	0	0	0	0	0.0831593	0	0	0.0277198	0	0	0	0	0	0	0	0	0	0	0	0	0	0	0	0	0	0	0	0	0	0	0	0	1	1
FBgn0004054	zen2	3R	2568854	0	0	0	0	0.304078	0	0	0.101359	0.286914	0	0.273777	0.186897	0	0.249492	0	0.083164	0	0	0	0	0	0	0	0	0	0	0	0	0	0	0	0	0	0	0	0	0.172345	0	0	0.0574483	0	0	0	0	1	1
FBgn0004055	uzip	2R	20899573	33.1177	37.0908	33.162	34.4568	43.4688	42.9016	34.0147	40.1284	37.5152	37.4335	34.1277	36.3588	35.3588	34.6197	35.3647	35.1144	31.9281	30.7287	30.8368	31.1645	30.8168	30.614	30.0121	30.481	33.162	32.9814	28.8796	31.6743	37.3036	35.8118	38.6957	37.2704	23.9925	26.5399	27.5989	26.0438	34.6345	31.3648	37.574	34.5244	29.6871	31.626	35.2758	32.1963	0.539391	1
FBgn0004057	Zw	X	19561266	15.9862	15.4677	12.0936	14.5158	15.2338	18.7098	15.4549	16.4662	15.6519	14.3478	17.2698	15.7565	14.4414	20.9805	15.6351	17.019	13.75	12.5544	12.8758	13.0601	23.7034	19.794	18.4313	20.6429	12.0936	16.1723	19.6843	15.9834	22.2909	16.8096	11.8866	16.9957	21.231	18.1366	15.9045	18.424	14.7134	19.7479	13.2165	15.8926	20.3784	19.8676	12.3338	17.5266	1	1
FBgn0004066	Prosalpha4	X	16170305	26.1458	31.5912	24.363	27.3667	28.5916	24.0605	21.5411	24.7311	26.9778	23.2913	23.3223	24.5305	22.8647	23.0583	27.088	24.337	20.1033	24.2029	25.8053	23.3705	34.0812	32.114	37.1012	34.4321	24.363	32.4856	26.1222	27.6569	24.815	25.3446	23.1094	24.423	25.2321	25.4776	25.6126	25.4408	21.5728	27.1307	24.4501	24.3845	30.3446	30.221	30.4951	30.3536	0.71111	1
FBgn0004087	Dhfr	3R	12306921	9.62104	7.06112	6.40514	7.69577	7.70181	8.565	6.32826	7.53169	9.99157	8.66952	14.3278	10.9963	9.51114	7.83409	7.49932	8.28152	6.73878	7.74226	3.69322	6.05809	3.14679	4.91292	8.46905	5.50959	6.40514	4.94857	6.12309	5.8256	10.5676	6.78758	10.7753	9.37683	10.1679	5.65815	9.36553	8.39719	9.26243	8.05655	6.28333	7.86744	9.22891	8.79098	7.0085	8.3428	0.0763614	1
FBgn0004101	bs	2R	20230389	2.64076	3.5523	3.50589	3.23298	3.97638	4.26742	4.35108	4.19829	2.3409	3.30697	3.42877	3.02555	3.52573	3.24982	3.22151	3.33235	3.20499	3.36585	3.4208	3.33055	6.28464	3.9894	3.34972	4.54125	3.50589	4.04294	2.53029	3.35971	3.7557	3.61424	2.4618	3.27725	2.3815	2.60366	3.20327	2.72948	2.95768	3.27376	3.53153	3.25432	3.24313	2.26757	3.18656	2.89909	0.0754636	1
FBgn0004102	oc	X	8524192	8.83621	10.5253	9.87585	9.74579	12.1347	10.3417	9.00662	10.4943	8.70369	11.5353	10.3349	10.1913	11.6862	10.2501	10.8622	10.9328	10.7271	10.8363	9.53793	10.3671	12.3375	8.5056	10.9353	10.5928	9.87585	10.1484	10.8822	10.3021	7.16829	8.42489	8.63183	8.075	5.58104	7.00586	5.97168	6.18619	8.97012	8.28288	10.179	9.144	7.54777	7.83409	8.55794	7.97993	0.913176	1
FBgn0004103	Pp1-87B	3R	8249343	94.0118	93.9671	95.1167	94.3652	102.49	94.8524	94.4033	97.2486	83.8028	97.9832	85.7111	89.1657	87.4236	86.5502	85.5403	86.5047	80.7319	80.9554	87.1658	82.951	83.4327	83.2432	100.094	88.9233	95.1167	90.6091	94.3764	93.3674	81.4503	80.8955	76.7851	79.7103	57.5655	67.8864	65.2479	63.5666	82.8328	75.6332	77.5687	78.6782	78.9111	79.6952	82.0988	80.235	0.447245	1
FBgn0004106	cdc2	2L	10384739	0	0	0	0	0.265151	0.314534	0.61507	0.398252	0	0	0.23873	0.0795767	0.403396	0	0.181989	0.195128	0.0973778	0.335245	0	0.144208	0	0	0	0	0	0.412255	0	0.137418	0.401865	0.145501	0.137018	0.228128	0.126164	0.13551	0	0.0872247	0	0	0	0	0.158292	0.169024	0.156075	0.16113	0.129793	1
FBgn0004107	cdc2c	3R	16561342	2.06573	0.920487	2.99139	1.99254	2.50998	1.11766	2.03783	1.88849	2.84197	2.25155	2.25987	2.45113	3.28523	3.39808	3.12654	3.26995	1.6385	1.39604	1.73302	1.58919	2.18778	0.960695	0.957883	1.36879	2.99139	3.29601	2.77561	3.021	2.17823	2.32658	1.94558	2.15013	2.26916	2.37255	1.06445	1.90205	2.19778	2.8207	2.79035	2.60294	1.82016	1.60002	2.77307	2.06442	1	1
FBgn0004108	Nrt	3L	16759174	8.61708	7.16762	8.91305	8.23258	9.20219	8.1146	6.89518	8.07066	6.93349	8.58342	6.55548	7.35746	7.30968	7.1828	7.67108	7.38785	7.73622	6.96715	7.21021	7.30453	6.39117	8.17995	8.87046	7.81386	8.91305	8.99029	7.33497	8.41277	6.45914	6.83712	5.93393	6.41006	5.3142	4.57808	4.54136	4.81121	6.88939	6.6331	7.29011	6.93753	6.19451	5.3988	5.73185	5.77505	0.127649	1
FBgn0004110	tin	3R	17204701	0	0.158265	0	0.052755	0	0.204769	0	0.0682563	0	0.387117	0	0.129039	0	0	0	0	0	0	0	0	0	0	0	0	0	0	0	0	0.0872078	0.0947243	0	0.060644	0	0	0	0	0	0.0963042	0	0.0321014	0	0	0	0	1	1
FBgn0004117	Tm2	3R	11135915	114.929	108.972	108.767	110.889	97.1022	113.221	115.34	108.554	73.6794	91.8335	77.9225	81.1451	110.356	87.0425	93.3202	96.9062	78.531	78.4907	72.6867	76.5695	137.952	115.057	113.351	122.12	108.767	114.555	124.585	115.969	84.1977	87.2098	95.0867	88.8314	46.6098	57.7606	52.5022	52.2909	80.9933	85.8308	90.8146	85.8796	65.9235	63.1634	87.5444	72.2104	0.00170372	0.122922
FBgn0004118	nAcRbeta-96A	3R	20334937	6.42371	7.63711	9.00433	7.68838	13.4208	11.7644	10.4826	11.8893	10.8209	12.8986	11.698	11.8058	11.6609	10.1412	9.34728	10.3831	9.13543	10.0239	11.1428	10.1007	11.7454	12.348	9.87386	11.3224	9.00433	10.683	10.7258	10.1377	11.1568	12.2175	14.1534	12.5092	9.48073	10.6295	8.60453	9.57159	12.8776	11.286	13.611	12.5915	10.0037	10.0134	11.0548	10.3573	0.879046	1
FBgn0004132	boca	2R	3453378	13.9543	17.2606	13.305	14.84	18.0076	14.5646	16.1392	16.2371	17.3773	19.733	9.94901	15.6864	16.9671	12.9283	19.1014	16.3323	13.5273	15.8686	13.7963	14.3974	11.5939	21.4087	24.4103	19.1376	13.305	15.908	15.1569	14.79	18.195	15.047	17.7651	17.0024	22.9787	20.2885	14.6288	19.2987	19.4541	18.0379	14.6071	17.3664	21.5006	20.0885	18.7905	20.1265	1	1
FBgn0004133	blow	2R	3467993	4.23402	4.45743	5.43975	4.7104	5.56663	4.65838	4.00034	4.74178	3.50857	4.201	4.99086	4.23348	4.71363	3.8949	4.58999	4.39951	4.8623	5.10799	2.96953	4.31327	6.92552	4.51043	5.02952	5.48849	5.43975	4.83557	5.14984	5.14172	3.76029	3.99615	3.83464	3.86369	2.8132	3.08163	2.84284	2.91256	3.77885	4.29489	4.4836	4.18578	3.52489	4.30525	3.70588	3.84534	0.958174	1
FBgn0004143	nullo	X	6943511	0	0	0	0	0	0	0	0	0	0	0	0	0.129287	0.418356	0.116654	0.221432	0.124837	0.14326	0	0.0893657	0	0.433693	0	0.144564	0	0	0.28611	0.09537	0.171729	0.186531	0.526969	0.295076	0	0.173722	0	0.0579073	0	0	0	0	0	0	0	0	1	1
FBgn0004167	kst	3L	3336860	18.4951	19.1391	16.998	18.2107	19.5608	18.4579	18.4821	18.8336	16.1535	19.7984	19.4704	18.4741	17.3441	16.488	17.4817	17.1046	16.2646	17.4374	15.2562	16.3194	19.5884	18.1754	18.2602	18.6747	16.998	20.6757	18.6155	18.7631	17.8843	18.82	20.8066	19.1703	13.6452	16.7248	17.9837	16.1179	19.6747	18.6861	21.7621	20.041	15.2539	16.4369	17.3926	16.3611	0.848572	1
FBgn0004168	5-HT1A	2R	14954664	4.57004	7.17991	5.45101	5.73365	8.86004	6.71293	6.89505	7.48934	7.11943	6.8582	7.51398	7.16387	8.08768	7.31653	8.49403	7.96608	7.72534	7.44406	7.73091	7.63344	5.85442	5.83443	8.21347	6.63411	5.45101	6.53226	7.26498	6.41608	5.2847	6.493	5.34647	5.70806	4.62373	4.58648	4.84826	4.68616	6.66347	4.81544	6.92319	6.13403	5.86945	3.49808	5.8882	5.08524	0.747024	1
FBgn0004169	up	X	13487507	188.408	172.704	158.655	173.256	195.064	184.154	190.924	190.047	114.88	146.605	125.696	129.06	172.509	139.425	179.76	163.898	127.085	135.956	117.751	126.931	236.449	182.226	177.502	198.726	158.655	200.55	175.357	178.187	128.484	137.118	115.665	127.089	52.5721	87.6777	81.4948	73.9149	138.128	131.949	144.291	138.123	106.299	92.2394	132.22	110.253	1.64954e-06	0.000349569
FBgn0004170	sc	X	290093	0	0	0	0	0.199509	0	0	0.066503	0.188248	0	0	0.0627493	0	0.0818481	0	0.0272827	0	0	0	0	0	0	0	0	0	0	0	0	0	0	0	0	0	0	0	0	0.112899	0	0	0.037633	0	0	0	0	1	1
FBgn0004171	Mst98Cb	3R	24118520	0	0	0	0	0	0	0	0	0	0	0	0	0	0	0	0	0	0	0	0	0	0	0	0	0	0	0	0	0	0	0.139075	0.0463583	0	0	0	0	0	0	0	0	0	0	0	0	1	1
FBgn0004172	Mst84Da	3R	3191572	0	0	0	0	0	0	0	0	0	0	0	0	0	0	0	0	0	0	0	0	0	0	0	0	0	0	0	0	0	0	0	0	0	0	0	0	0	0	0	0	0	0	0	0	1	1
FBgn0004173	Mst84Db	3R	3190880	0	0	0	0	0	0	0	0	0	0	0	0	0	0	0	0	0	0	0	0	0	0	0	0	0	0	0	0	0	0	0	0	0	0	0	0	0	0	0	0	0	0	0	0	1	1
FBgn0004174	Mst84Dc	3R	3189975	0	0	0	0	0	0	0	0	0	0	0	0	0	0	0	0	0	0	0	0	0	0	0	0	0	0	0	0	0	0	0	0	0	0	0	0	0	0	0	0	0	0	0	0	1	1
FBgn0004175	Mst84Dd	3R	3189017	0	0	0	0	0	0	0	0	0	0	0	0	0	0	0	0	0	0	0	0	0	0	0	0	0	0	0	0	0	0	0	0	0	0	0	0	0	0	0	0	0	0	0	0	1	1
FBgn0004177	mts	2L	7827743	131.641	124.997	111.482	122.707	135.675	132.974	118.709	129.119	119.193	116.094	113.142	116.143	112.876	109.97	114.549	112.465	106.572	106.589	109.084	107.415	115.391	118.315	120.17	117.959	111.482	122.267	119.74	117.83	107.74	106.039	76.0328	96.6039	74.7101	87.515	96.5612	86.2621	109.5	98.9153	106.744	105.053	98.0607	108.991	110.256	105.769	0.37864	1
FBgn0004179	Csp	3L	22260361	53.2315	50.5719	60.4743	54.7592	67.4177	62.8196	60.6591	63.6321	56.5101	66.1691	62.364	61.6811	61.0472	55.1635	57.1441	57.7849	53.7064	58.2115	61.7635	57.8938	63.1431	56.1102	62.5296	60.5943	60.4743	60.2236	60.8638	60.5206	56.8394	56.3843	59.2591	57.4943	38.6346	44.6037	49.4977	44.2453	61.6746	49.8553	65.8004	59.1101	55.4025	55.7219	58.1772	56.4339	0.811422	1
FBgn0004181	Peb	2R	21062864	0	0	0	0	0	0	0	0	0	0	0	0	0	0	0.0643926	0.0214642	0	0	0	0	0	0	0	0	0	0	0	0	0	0	0	0	0	0	0	0	0	0	0	0	0	0	0	0	1	1
FBgn0004183	snRNA:U1:82Eb	3R	773655	0	0	0	0	1.74935	0	0	0.583117	0	0	0.393759	0.131253	0.798428	0	0	0.266143	1.1243	1.84317	0.177623	1.04836	0	0	0	0	0	1.69992	0	0.56664	0	0	0	0	0	0.894033	0	0.298011	0	1.21995	0	0.40665	0	0	0	0	1	1
FBgn0004185	snRNA:U1:95Ca	3R	19685189	15.2543	20.0485	24.644	19.9823	22.3043	18.5035	16.0628	18.9569	18.2943	15.202	27.6944	20.3969	15.8244	19.8555	17.3099	17.6633	28.1074	20.0291	29.5447	25.8937	3.49439	9.67172	6.32358	6.49656	24.644	8.95293	7.73019	13.7757	12.8148	12.6393	11.9778	12.4773	17.5492	10.9519	7.86032	12.1205	14.519	19.4379	15.865	16.6073	13.0543	12.3595	22.9112	16.1083	0.533696	1
FBgn0004186	snRNA:U1:95Cb	3R	19653592	14.226	20.0485	23.6961	19.3235	22.3043	18.5035	16.0628	18.9569	18.2943	17.1636	30.8444	22.1008	15.8244	19.8555	17.3099	17.6633	30.6773	20.0291	30.2551	26.9872	3.49439	9.67172	6.32358	6.49656	23.6961	8.95293	7.73019	13.4597	12.8148	12.6393	11.9778	12.4773	18.3815	10.9519	7.86032	12.3979	14.0241	19.4379	15.865	16.4423	13.0543	12.3595	22.3963	15.9367	0.442874	1
FBgn0004187	snRNA:U1:95Cc	3R	19652056	4.62772	7.21746	10.4263	7.42383	11.8081	8.81941	10.6521	10.4265	11.1416	7.35582	12.6003	10.3659	6.28762	7.17668	7.50429	6.98953	10.9218	8.10993	12.0784	10.37	0.953015	2.23193	2.37134	1.8521	10.4263	2.71988	3.31294	5.48637	3.977	4.31977	4.74593	4.34757	7.28325	5.5877	3.97432	5.61509	8.41445	8.78365	7.67663	8.29158	5.74388	4.1818	9.01002	6.3119	0.881425	1
FBgn0004188	snRNA:U6:96Aa	3R	20381810	9.45728	9.01371	7.74812	8.7397	8.04375	6.36122	4.14645	6.18381	0	6.01298	9.65629	5.22309	5.099	3.66659	3.98732	4.25097	4.26703	3.39005	5.4449	4.36733	9.73797	6.84182	9.69221	8.75733	7.74812	4.86358	6.77037	6.46069	5.4183	4.41398	4.6185	4.81693	3.40209	4.56764	1.62439	3.19804	12.644	8.47657	12.5504	11.2237	7.46981	9.11571	9.46955	8.68502	1	1
FBgn0004189	snRNA:U6:96Ab	3R	20382414	9.45728	9.01371	7.74812	8.7397	8.04375	6.36122	4.14645	6.18381	0	6.01298	9.65629	5.22309	5.099	3.66659	3.98732	4.25097	4.26703	3.39005	5.4449	4.36733	9.73797	6.84182	9.69221	8.75733	7.74812	4.86358	6.77037	6.46069	5.4183	4.41398	4.6185	4.81693	3.40209	4.56764	1.62439	3.19804	12.644	8.47657	12.5504	11.2237	7.46981	9.11571	9.46955	8.68502	0.892313	1
FBgn0004190	snRNA:U6:96Ac	3R	20382937	9.45728	9.01371	7.74812	8.7397	8.04375	6.36122	4.14645	6.18381	0	6.01298	9.65629	5.22309	5.099	3.66659	3.98732	4.25097	4.26703	3.39005	5.4449	4.36733	9.73797	6.84182	9.69221	8.75733	7.74812	4.86358	6.77037	6.46069	5.4183	4.41398	4.6185	4.81693	3.40209	4.56764	1.62439	3.19804	12.644	8.47657	12.5504	11.2237	7.46981	9.11571	9.46955	8.68502	1	1
FBgn0004191	snRNA:U2:34ABa	2L	13211925	6.67592	8.26555	8.50099	7.81415	35.8368	35.746	18.8618	30.1482	24.6027	43.8979	31.9519	33.4842	35.0183	32.0501	28.6309	31.8998	38.1117	26.6594	27.8456	30.8722	5.86104	16.3001	11.748	11.303	8.50099	11.1515	8.61517	9.42255	31.1897	18.7497	23.5507	24.4967	18.5093	14.5349	13.1866	15.4103	13.6278	18.201	10.8265	14.2184	11.2249	14.7799	12.5482	12.851	0.0222832	0.686652
FBgn0004192	snRNA:U2:34ABb	2L	13215839	33.0282	26.9886	30.7655	30.2608	19.5247	23.3383	23.0501	21.971	22.8403	25.7467	24.8888	24.4919	23.0361	20.1475	18.546	20.5765	27.8224	18.9974	20.7148	22.5115	22.1417	29.1686	34.0288	28.4464	30.7655	32.8737	25.2796	29.6396	23.7036	17.7931	20.4621	20.6529	11.8734	15.4258	10.7726	12.6906	17.0805	40.0144	26.0536	27.7162	20.0709	26.2896	25.8881	24.0829	0.0983653	1
FBgn0004197	Ser	3R	22997818	0.243018	0.331638	0.223987	0.266214	0.413392	0.367787	0.479471	0.420217	0.243786	0.231768	0.232624	0.236059	0.530656	0.529978	0.248269	0.436301	0.246707	0.326671	0.314808	0.296062	0.675624	0.659289	0.560375	0.631763	0.223987	0.562395	0.434936	0.407106	0.626539	0.311915	0.267028	0.401827	0.36881	0.501766	0.344365	0.40498	0.526349	0.634234	0.393049	0.517877	0.524428	0.329402	0.121667	0.325166	0.0534422	0.99928
FBgn0004198	ct	X	7503181	24.7799	25.0369	24.3133	24.71	30.7961	31.8246	26.186	29.6022	19.7043	26.6992	24.5254	23.643	27.6812	24.8736	26.63	26.3949	26.6295	25.6868	27.6055	26.6406	30.4249	25.4289	28.6065	28.1534	24.3133	26.2321	28.6449	26.3968	18.4024	19.2427	17.6458	18.4303	11.386	15.3688	12.7351	13.1633	21.0783	17.7627	22.5135	20.4515	16.1028	15.1338	19.3305	16.8557	0.069798	1
FBgn0004227	nonA	X	16255566	27.3306	30.9466	27.8545	28.7106	29.3828	37.3464	29.8498	32.193	28.4193	31.6312	31.5079	30.5195	28.6554	26.7877	26.3056	27.2496	27.9694	29.8518	29.8598	29.227	28.9906	31.9248	33.9548	31.6234	27.8545	30.3233	28.9496	29.0425	27.5921	31.5914	27.2798	28.8211	20.9242	26.4961	24.509	23.9764	31.5225	27.195	35.0347	31.2507	26.8403	24.3104	26.8707	26.0071	0.945034	1
FBgn0004228	mex1	3L	15510524	0	0	0.437869	0.145956	0	0	0	0	0	0.453039	0	0.151013	0	0	0.0952188	0.0317396	0	0	0	0	0	0	0	0	0.437869	0	0	0.145956	0	0	0	0	0.367002	0	0	0.122334	0	0.225407	0	0.0751357	0.2412	0.257553	0.713548	0.4041	1	1
FBgn0004237	Hrb87F	3R	9482568	43.338	36.5963	38.0946	39.343	41.1865	41.2398	35.4072	39.2778	39.9881	35.8736	32.1879	36.0165	37.9734	36.7788	37.4218	37.3913	35.3671	36.7581	35.7915	35.9722	38.9051	43.1878	48.7755	43.6228	38.0946	38.1318	38.9068	38.3777	40.0627	39.9731	31.7776	37.2711	38.8659	36.5288	39.5285	38.3077	41.9683	35.8309	40.6128	39.4707	38.6473	37.2262	41.6577	39.1771	0.504555	1
FBgn0004240	Dpt	2R	14753270	316.908	173.943	305.252	265.368	207.073	155.754	65.0746	142.634	111.336	97.2867	138.527	115.717	147.838	133.834	261.227	180.966	32.2886	81.908	96.7874	70.328	786.514	723.219	925.99	811.908	305.252	806.235	1134.84	748.776	10.2276	3.80883	0.896697	4.97771	22.2928	33.4037	7.3589	21.0185	352.193	154.249	360.43	288.957	527.283	315.622	579.481	474.129	0.304235	1
FBgn0004242	Syt1	2L	2779267	123.632	152.097	133.459	136.396	181.373	176.43	159.544	172.449	135.585	182.104	172.302	163.33	185.932	170.966	170.158	175.685	166.318	159.906	169.207	165.144	169.028	146.181	163.071	159.427	133.459	173.723	158.457	155.213	133.849	150.506	148.676	144.344	80.2961	109.278	109.218	99.5974	161.118	120.808	169.301	150.409	123.118	113.928	146.003	127.683	0.724572	1
FBgn0004244	Rdl	3L	9138938	48.6842	60.1627	53.8547	54.2339	64.255	68.3308	57.2138	63.2665	49.391	65.4452	61.6521	58.8294	71.1699	63.1692	63.4061	65.9151	56.3255	59.0117	62.2281	59.1884	70.1238	62.9498	67.3817	66.8184	53.8547	63.804	68.2073	61.9553	40.0226	45.4412	40.2227	41.8955	20.8538	34.0226	33.7091	29.5285	56.3797	39.1054	57.9023	51.1291	39.9421	36.6861	52.6556	43.0946	0.781104	1
FBgn0004359	T48	3R	22707456	4.54521	4.51104	4.5701	4.54212	3.86586	5.14171	3.66857	4.22538	4.08979	5.38566	2.32043	3.93196	2.4506	2.59521	2.45236	2.49939	3.48484	2.8142	2.4741	2.92438	5.61613	3.43767	3.01719	4.02366	4.5701	3.36958	4.14129	4.02699	3.66935	2.63565	3.57165	3.29222	3.40018	2.33493	2.12916	2.62142	3.18202	2.94103	3.56425	3.2291	3.00723	3.36046	3.37885	3.24885	0.779318	1
FBgn0004360	Wnt2	2R	5381674	0.150787	0	0.277956	0.142914	0.256499	0.456404	0.14875	0.287218	0.242021	0.287612	0.230939	0.253524	0.146337	0.210456	0.528151	0.294981	0.1884	0.0540508	0.052088	0.0981796	1.39736	0.327257	0	0.574872	0.277956	0.697903	0.215893	0.397251	0.0647919	0.492634	0.331368	0.296265	0.244093	0.131087	0.155396	0.176859	0	0.21465	0.225117	0.146589	0.306253	0.654033	0.0754911	0.345259	0.759436	1
FBgn0004362	HmgD	2R	17600836	28.1245	23.4993	29.1518	26.9252	30.0919	26.8052	29.2749	28.724	32.2174	27.6903	22.6121	27.5066	30.7868	30.0622	25.9873	28.9454	26.7468	28.7475	33.1273	29.5405	27.4545	28.7372	30.6319	28.9412	29.1518	23.6921	22.8209	25.2216	28.0932	26.4629	26.6428	27.0663	17.9364	18.4665	20.2814	18.8948	23.8426	21.814	29.3385	24.9984	25.6765	25.9822	28.605	26.7546	0.948993	1
FBgn0004363	porin	2L	10847227	373.229	335.651	344.808	351.229	340.642	369.13	331.374	347.049	302.914	309.884	314.039	308.946	317.99	319.887	339.945	325.941	303.787	294.432	295.648	297.956	398.532	362.325	358.292	373.05	344.808	342.155	365.428	350.797	360.73	332.341	298.407	330.493	371.615	332.718	317.001	340.445	353.669	329.037	320.679	334.462	358.987	356.361	373.994	363.114	0.308681	1
FBgn0004364	18w	2R	15999016	16.0505	15.6696	13.4174	15.0458	14.8685	17.826	16.1405	16.2783	17.7238	16.4941	15.7689	16.6623	14.3291	14.4354	14.8356	14.5334	16.3038	17.082	15.688	16.3579	13.8365	11.7467	9.8265	11.8032	13.4174	12.8339	11.9358	12.729	16.9212	16.26	14.3004	15.8272	18.4043	15.2516	16.8938	16.8499	18.0554	15.6456	11.6717	15.1242	14.5938	13.8293	13.019	13.814	0.432748	1
FBgn0004366		3L	20252967	31.9457	39.8691	35.4774	35.7641	40.9008	34.9446	34.3255	36.7236	32.038	32.4084	39.6742	34.7069	30.7755	31.3455	36.8972	33.0061	34.7147	35.0563	30.5249	33.432	34.4791	30.9985	38.7092	34.7289	35.4774	39.6267	35.8874	36.9972	34.4196	38.2311	45.6457	39.4321	23.3073	28.3483	26.3704	26.0087	38.1997	36.7448	45.3453	40.0966	34.5694	32.2425	35.6443	34.1521	0.90861	1
FBgn0004367	mei-41	X	16285794	0.491184	0.905341	0.699654	0.698726	0.797561	0.810942	0.660748	0.756417	1.00339	0.809134	0.752281	0.854935	0.650031	0.451844	0.67775	0.593208	0.557918	0.736291	0.786677	0.693629	1.24142	0.775297	0.669275	0.895331	0.699654	0.590495	0.607367	0.632505	0.805858	0.854475	0.804661	0.821665	0.795128	0.854029	0.667262	0.77214	0.81669	0.635654	0.866644	0.772996	0.929594	0.798937	0.625954	0.784828	0.462051	1
FBgn0004368	Ptp4E	X	4833165	6.91004	8.29526	8.80778	8.00436	7.96546	8.44446	8.42474	8.27822	8.79992	7.68874	8.73189	8.40685	6.89886	5.78666	7.44964	6.71172	7.06923	7.32015	7.36533	7.25157	10.1037	8.32469	9.56608	9.33149	8.80778	8.42538	9.22719	8.82012	6.54405	7.15989	8.74983	7.48459	5.72499	6.77532	6.06297	6.18776	8.22018	6.52439	7.93937	7.56131	5.7261	5.74767	7.38375	6.28584	0.333414	1
FBgn0004369	Ptp99A	3R	25202987	23.9926	22.973	23.5487	23.5048	27.8996	29.3171	23.4577	26.8915	22.6766	29.1122	26.1956	25.9948	25.8172	23.5577	24.8268	24.7339	21.4238	21.7335	24.6111	22.5895	24.1994	23.5748	22.0354	23.2699	23.5487	23.1204	25.739	24.136	19.9846	23.6593	23.4409	22.3616	14.4857	17.1453	17.8717	16.5009	24.0199	18.3192	23.5178	21.9523	18.9435	18.1175	21.6711	19.5774	0.69765	1
FBgn0004370	Ptp10D	X	11516061	10.7148	9.40805	8.39707	9.50664	10.2457	11.4239	9.58904	10.4195	9.23707	10.496	9.84655	9.85987	9.6775	8.64559	8.68304	9.00204	9.20853	8.9235	8.49754	8.87652	9.62028	10.7358	11.5708	10.6423	8.39707	10.1018	9.95284	9.4839	7.94251	7.70426	8.66852	8.1051	5.78277	6.85973	6.80554	6.48268	7.68908	7.92126	9.17524	8.26186	6.63867	7.70593	7.50311	7.28257	0.826325	1
FBgn0004372	aly	3L	3024129	0	0	0	0	0	0	0	0	0	0	0	0	0	0	0	0	0	0.340211	0	0.113404	0	0	0	0	0	0	0	0	0.0815618	0	0.0834269	0.0549962	0	0	0	0	0	0.0900692	0	0.0300231	0	0	0	0	1	1
FBgn0004373	fwd	3L	305393	19.6084	20.3361	18.0665	19.337	24.0146	22.5327	21.113	22.5534	21.2797	21.8836	20.709	21.2908	21.4681	19.9189	20.0079	20.465	20.1325	20.4767	21.1278	20.579	16.2492	16.5802	20.1579	17.6624	18.0665	21.4631	20.5713	20.0336	20.095	21.8507	23.1469	21.6975	16.7873	19.0394	20.2262	18.6843	23.8088	21.0353	21.1737	22.0059	21.1374	18.4354	20.4112	19.9947	0.570171	1
FBgn0004374	neb	2L	20075757	0.187812	0.219685	0.605861	0.337786	0.479221	0.378982	0.463186	0.440463	0.150724	0.268676	0.287646	0.235682	0.33416	0.294899	0.438558	0.355872	0.381324	0.47126	0.227073	0.359886	0.174047	0.407614	0.757879	0.446513	0.605861	0.248363	0.470583	0.441602	0.68596	0.306799	0.412733	0.468497	0.722069	0.530645	0.629046	0.627253	0.54237	0.311916	0.373858	0.409381	0.333771	0.254571	0.37611	0.321484	0.249439	1
FBgn0004378	Klp61F	3L	1241568	0.0871376	0	0	0.0290459	0.0741136	0	0	0.0247045	0.139861	0.0831037	0.333642	0.185536	0.0563774	0.030405	0.0508686	0.0458837	0.0272185	0	0.0903029	0.0391738	0	0.0945588	0	0.0315196	0	0	0	0	0.0748847	0.0406695	0	0.0385181	0.070529	0	0	0.0235097	0.0419399	0.0413479	0.0433641	0.0422173	0	0	0	0	0.0454757	0.946795
FBgn0004379	Klp67A	3L	9355731	0.34903	0.0907089	0.107213	0.182317	0.1979	0.234757	0.114751	0.182469	0.0933518	0.221935	0.53461	0.283299	0.15055	0.121787	0.237735	0.170024	0.109024	0.250237	0.160763	0.173341	0	0.631282	0.402411	0.344564	0.107213	0.0769126	0.333186	0.172437	0.199972	0.162902	0.102265	0.155046	0.282529	0.404612	0.239821	0.308987	0.223992	0.110407	0.289502	0.207967	0.295382	0.0630681	0	0.119483	0.594501	1
FBgn0004380	Klp64D	3L	5350321	12.8538	14.2438	14.0918	13.7298	14.6151	16.9275	12.0127	14.5184	14.0073	14.0653	11.7082	13.2603	11.9054	12.747	11.7294	12.1273	12.8481	12.7071	12.1522	12.5691	13.291	14.5358	18.7196	15.5155	14.0918	14.2245	14.1418	14.1527	14.3602	14.8401	14.6291	14.6098	9.80149	11.2333	12.4798	11.1715	15.3037	12.7122	18.18	15.3986	13.6715	11.2973	14.9703	13.313	0.642053	1
FBgn0004381	Klp68D	3L	11788714	7.76332	9.73895	9.85153	9.11793	11.4082	11.1247	9.76726	10.7667	7.40408	9.13206	8.70212	8.41275	8.53193	8.04804	9.03423	8.53807	8.30982	9.84965	9.23896	9.13281	9.64431	12.6978	8.82115	10.3878	9.85153	9.91661	10.3287	10.0323	8.0848	9.88857	9.07848	9.01728	8.33261	7.53867	7.55402	7.80843	12.0968	8.6191	10.1696	10.2952	10.6831	9.2113	9.96582	9.95341	0.0696212	1
FBgn0004387	Klp98A	3R	23373497	8.94145	10.2822	10.5773	9.93365	12.1648	11.864	12.6407	12.2232	9.62688	10.2028	10.4111	10.0803	9.36689	10.1389	9.53034	9.67871	10.0539	9.91118	9.04816	9.67108	7.53036	9.67164	9.65529	8.95243	10.5773	11.7056	10.3158	10.8662	9.27184	11.8272	10.3324	10.4771	7.74188	9.75557	8.68424	8.72723	12.2587	10.6676	10.6547	11.1937	9.72764	8.8718	9.16967	9.25637	0.100654	1
FBgn0004389	bnk	3R	27018946	0	0	0	0	0	0	0	0	0	0	0	0	0.138828	0	0.0626312	0.0671531	0	0	0	0	0	0	0	0	0	0	0.153611	0.0512037	0	0	0	0	0	0	0	0	0	0	0	0	0	0	0	0	1	1
FBgn0004390	RasGAP1	3L	9832193	5.89703	6.81406	6.40821	6.3731	8.50019	9.09491	7.04208	8.21239	5.50372	8.99847	6.70245	7.06821	6.60722	6.64949	6.41587	6.55753	5.68308	5.80127	6.19759	5.89398	6.86544	7.88165	7.46862	7.40524	6.40821	7.38975	6.88803	6.89533	7.09045	7.4476	7.74831	7.42879	4.6086	4.82983	5.0218	4.82008	8.27585	5.71424	6.61072	6.86694	6.14738	5.88985	6.6822	6.23981	0.28576	1
FBgn0004391	shtd	X	15349572	2.39315	1.107	1.673	1.72438	3.326	1.81204	2.27544	2.47116	1.59038	1.95301	1.33637	1.62659	2.09804	2.53327	2.59238	2.4079	2.06699	1.37724	1.22367	1.55597	1.37187	3.54312	1.67206	2.19568	1.673	1.60264	1.72618	1.66727	1.75828	1.36682	2.21002	1.77837	1.43172	1.23912	1.49839	1.38974	2.0017	1.7364	2.05529	1.93113	1.64486	1.96733	2.00855	1.87358	0.948755	1
FBgn0004394	pdm2	2L	12657829	0.743614	0.437698	0.857636	0.679649	0.790559	0.656457	0.722979	0.723332	0.223781	1.14075	0.569428	0.644653	0.570943	0.761964	0.542611	0.625173	0.319433	0.515337	1.02114	0.618637	1.43719	0.336585	1.33809	1.03729	0.857636	0.634989	0.798493	0.763706	0.521043	0.347053	0.344299	0.404132	0.338726	0.349049	0.328568	0.338781	0.68103	0.459203	0.832619	0.657617	0.32423	0.603113	0.739877	0.55574	0.383579	1
FBgn0004395	unk	3R	18975963	13.49	15.2657	12.4898	13.7485	14.5236	14.2857	13.7293	14.1795	11.8729	12.3515	13.696	12.6401	12.1831	12.7305	10.9396	11.9511	9.95225	10.8965	11.9768	10.9419	14.6105	14.769	14.2736	14.551	12.4898	12.071	12.559	12.3733	11.4988	12.8772	13.9412	12.7724	6.17465	9.06664	9.34172	8.19434	14.6632	11.4733	17.6654	14.6006	13.819	12.1459	14.3021	13.4223	0.487533	1
FBgn0004396	CrebA	3L	15528514	29.5248	24.9614	21.8246	25.4369	22.2346	21.8814	24.3627	22.8262	32.3887	27.3071	27.4698	29.0552	32.8763	32.1413	30.9811	31.9996	40.0587	35.7692	38.3718	38.0666	32.5811	32.1195	32.1478	32.2828	21.8246	22.9428	25.4106	23.3927	15.2887	11.639	10.833	12.5869	21.1494	20.6766	22.9697	21.5986	12.5417	12.4507	13.9954	12.9959	11.9352	14.9413	16.5698	14.4821	0.000203341	0.0231072
FBgn0004397	Vinc	X	2108319	18.5871	19.0364	17.6052	18.4096	23.3129	21.6052	19.35	21.4227	17.9413	22.5464	20.5307	20.3395	18.7868	17.2153	23.0265	19.6762	17.9796	19.9882	17.3982	18.4553	16.3518	16.1733	19.6524	17.3925	17.6052	19.7091	23.4241	20.2461	16.3784	15.8311	15.8117	16.0071	12.8259	12.4729	12.1817	12.4935	14.9652	15.5668	15.0897	15.2072	12.1343	12.1675	14.0228	12.7749	0.784056	1
FBgn0004400	rhi	2R	13515994	0.214984	0	0.198148	0.137711	0.914257	0.867624	0	0.59396	0.17253	0	0.329262	0.167264	0.417279	0.150029	0.564759	0.377356	0.268611	0.462378	0.222793	0.317927	0	0	0	0	0.198148	0	0	0.0660493	0	0.501695	0.0944894	0.198728	0.174008	0.0934489	0.332333	0.19993	0.206946	0.204025	0.32096	0.243977	0.10916	0	0.215263	0.108141	0.168371	1
FBgn0004401	Pep	3L	17631218	76.3077	81.8621	76.2749	78.1482	75.2666	77.5171	55.7505	69.5114	57.5101	72.1275	64.9142	64.8506	54.4625	51.2495	56.2531	53.9884	51.6987	56.6806	56.121	54.8334	90.3414	81.4345	83.728	85.168	76.2749	83.1	83.0016	80.7922	57.3136	61.8799	54.2421	57.8119	40.371	47.955	47.0629	45.1296	72.303	67.3482	80.852	73.5011	64.0362	57.8991	74.1075	65.3476	0.764898	1
FBgn0004403	RpS14a	X	7827775	602.598	610.259	600.51	604.456	527.496	512.373	516.299	518.723	530.761	509.526	491.525	510.604	388.678	426.593	459.102	424.791	495.094	443.867	465.486	468.149	509.792	549.945	498.128	519.288	600.51	492.566	490.908	527.995	686.282	596.156	584.189	622.209	804.376	680.674	558.822	681.291	739.055	733.125	553.668	675.283	766.657	731.483	643.328	713.823	0.766814	1
FBgn0004404	RpS14b	X	7828931	356.953	352.101	364.433	357.829	346.564	367.789	313.928	342.76	387.583	369.868	359.522	372.324	248.83	238.039	270.222	252.364	327.571	308.114	324.843	320.176	381.764	351.42	404.754	379.313	364.433	325.824	343.933	344.73	361.746	311.196	313.282	328.741	487.094	362.65	322.749	390.831	374.133	358.998	278.048	337.06	390.848	349.031	307.962	349.28	0.0733376	1
FBgn0004406	tam	2L	13823980	1.28359	1.07245	1.18307	1.1797	1.16972	1.29507	0.814019	1.09294	0.588639	0.786967	0.631898	0.669168	0.889795	1.18369	0.883136	0.98554	0.744613	0.821635	0.950156	0.838801	0.679726	0.397975	1.37421	0.817304	1.18307	0.909337	1.18146	1.09129	1.02431	0.984216	0.805946	0.938157	0.742098	0.836925	0.566926	0.715316	0.750187	1.17465	1.04942	0.991419	0.791417	0.845074	1.10165	0.912714	0.126393	1
FBgn0004414	msopa	3L	22075908	0	0	0	0	0	0	0	0	0	0	0	0	0	0	0	0	0	0	0	0	0	0	0	0	0	0.59159	0	0.197197	0	0	0	0	0	0	0	0	0	0	0	0	0	0	0	0	1	1
FBgn0004419	me31B	2L	10239326	40.898	37.466	37.2008	38.5216	40.6954	40.4625	31.3363	37.4981	33.6184	34.0244	39.2248	35.6225	38.6635	35.0629	35.2168	36.3144	32.1856	30.4592	30.1075	30.9174	38.2687	37.7025	33.956	36.6424	37.2008	35.8371	32.5474	35.1951	38.0477	39.3811	36.4955	37.9748	31.9514	35.1457	30.7243	32.6071	38.1527	37.0233	39.4428	38.2063	36.4923	38.6435	43.0737	39.4032	0.951887	1
FBgn0004425	LysB	3L	1207371	0	0	0	0	0	0	0	0	0	0	0	0	0	0.121088	0	0.0403627	0	0	0	0	0	0	0	0	0	0.458909	0	0.15297	0.149115	0	0.152525	0.100547	0	0	0.536451	0.178817	0	0	0	0	0	0	0.289564	0.0965213	1	1
FBgn0004426	LysC	3L	1210485	0	0	0	0	0	0	0	0	0	0	0	0	0	0	0	0	0	0	0	0	0	0	0	0	0	0	0	0	0	0	0	0	0	0	0	0	0	0	0	0	0	0	0	0	1	1
FBgn0004427	LysD	3L	1210717	0	0	0	0	0	0	0	0	0	0	0.538137	0.179379	0	0.122602	0	0.0408673	0	0	0	0	0	0.762578	0	0.254193	0	1.85858	0	0.619527	0.150979	0.163991	0.154431	0.156467	0	0	0.181052	0.0603507	0	0	0	0	0	0	0.293183	0.0977277	1	1
FBgn0004428	LysE	3L	1212827	0	0	0	0	0	0	0	0	0	0	0	0	0	0	0	0	0	0	0	0	0	0	0	0	0	0	0	0	0	0.135717	0	0.045239	0	0.505591	0	0.16853	0	0	0	0	0.590593	0	0.0970538	0.229216	1	1
FBgn0004429	LysP	3L	1218082	1.09694	2.13851	0	1.07848	0	0	0	0	0	0	0	0	0	0.191378	0.320183	0.17052	0	0	0	0	0	2.97591	3.16179	2.0459	0	5.43975	0.392645	1.94413	0.235674	0	0	0.078558	0	0	0	0	0.263983	0.780769	0	0.348251	0.278491	0.892117	0	0.390203	1	1
FBgn0004430	LysS	3L	1227747	0	0	1.26379	0.421263	1.74935	0	0	0.583117	0.550204	0	0	0.183401	0	0	0	0	0.642456	0.245756	0	0.296071	0	0	0	0	1.26379	0	0	0.421263	0.883777	0.639967	0	0.507915	0.832372	0	0.706545	0.512972	1.97987	0.650641	0	0.876837	1.04434	0	0	0.348113	0.639402	1
FBgn0004431	LysX	3L	1194739	1.19613	0.466376	0	0.554169	1.01735	0.603414	0	0.540255	0	0	0	0	0.386945	0.417367	0.174568	0.326293	0	0.428765	0	0.142922	0	0	0	0	0	0	0	0	0	0	0	0	0	0	0	0	0.575707	0.28379	0.892884	0.584127	0.303674	0.324262	0.598842	0.408926	0.258146	1
FBgn0004432	Cyp1	X	16211706	338.904	315.478	311.383	321.922	353.135	349.98	343.766	348.96	391.225	348.819	357.231	365.758	276.365	289.746	280.86	282.324	302.306	296.801	303.376	300.828	257.658	260.178	254.976	257.604	311.383	265.914	269.068	282.122	431.049	378.878	342.888	384.272	373.383	386.138	391.723	383.748	344.145	342.566	319.586	335.432	375.341	383.927	377.936	379.068	0.189292	1
FBgn0004435	Galphaq	2R	8500246	228.619	249.481	253.146	243.749	294.82	252.775	261.623	269.739	221.71	259.058	264.439	248.402	210.353	195.196	229.311	211.62	223.302	217.975	213.518	218.265	216.554	205.711	208.481	210.249	253.146	240.354	222.966	238.822	234.515	236.583	252.988	241.362	155.904	182.715	171.124	169.914	235.202	210.919	237.223	227.781	206.713	196.043	234.148	212.301	0.690519	1
FBgn0004436	UbcD6	3R	774477	70.0776	60.7381	67.4324	66.0827	62.9989	61.0417	61.659	61.8999	53.1212	56.9091	63.2847	57.7717	60.7357	62.9388	69.0398	64.2381	66.242	59.7708	58.9465	61.6531	48.7894	46.9281	62.6329	52.7835	67.4324	63.7905	59.3954	63.5394	63.7633	61.1593	61.5161	62.1462	57.1861	59.1461	58.4798	58.2707	68.7127	60.0447	63.5639	64.1071	72.6256	66.118	64.3281	67.6906	0.761334	1
FBgn0004449	Ten-m	3L	22286144	22.0863	21.9656	18.9772	21.0097	23.8196	25.1704	22.0855	23.6918	18.3965	24.2798	20.9468	21.2077	23.8777	22.7143	21.5069	22.6996	18.6922	20.581	20.5801	19.9511	25.2935	22.0896	25.0329	24.1387	18.9772	23.3302	21.2297	21.179	19.6448	20.8621	21.1816	20.5628	15.1056	16.5978	16.9806	16.228	23.0431	19.7313	22.7747	21.8497	18.627	17.6122	17.2995	17.8462	0.302156	1
FBgn0004456	mew	X	13108442	5.62014	4.19797	3.73027	4.51613	6.48978	5.11617	4.93583	5.51393	4.8291	5.10241	4.55621	4.82924	4.13397	4.54173	5.14993	4.60854	4.57813	4.80814	3.92374	4.43667	4.88754	4.76235	4.80039	4.81676	3.73027	4.21669	4.68246	4.20981	4.24838	4.29673	4.79143	4.44551	4.01908	3.51726	4.17697	3.90444	4.73899	5.25508	3.86936	4.62114	4.39452	4.2728	4.99291	4.55341	0.371968	1
FBgn0004462	Pk17E	X	18682499	16.6534	14.2405	17.7809	16.2249	18.0644	17.2507	19.5553	18.2901	16.5613	16.4298	13.8502	15.6138	15.8926	14.9572	16.683	15.8443	13.6803	13.9914	14.9534	14.2084	21.4773	17.0683	20.8409	19.7955	17.7809	18.1434	17.3961	17.7735	21.4151	19.5018	20.7418	20.5529	14.2885	14.3572	16.7787	15.1415	19.6415	19.5966	20.4088	19.8823	19.4397	14.0619	16.9629	16.8215	0.337797	1
FBgn0004463	RpIII128	2R	7926595	2.02791	3.53928	2.75915	2.77545	3.94243	2.33834	3.90577	3.39551	2.24744	3.59178	4.06723	3.30215	3.65499	3.40322	3.07235	3.37685	2.92591	2.35385	2.83546	2.70507	3.04266	1.78146	4.56482	3.12965	2.75915	3.44793	2.48873	2.8986	4.19092	4.1465	3.98965	4.10902	3.75175	2.9383	3.63245	3.44083	4.46193	3.39086	3.50814	3.78698	4.70716	4.13622	4.5929	4.47876	0.961097	1
FBgn0004465	Su(P)	3L	16603762	10.2722	10.432	8.587	9.76373	10.7687	11.8102	15.0823	12.5537	9.39399	9.34099	10.9762	9.90373	11.4373	8.0021	9.69222	9.71054	9.02896	9.84763	9.98514	9.62058	10.6263	9.07316	9.36445	9.68797	8.587	9.95105	10.09	9.54268	15.6025	12.822	15.7493	14.7246	11.5047	12.1492	11.2016	11.6185	11.0379	8.84171	12.3638	10.7478	12.7362	12.3045	10.7639	11.9349	0.176533	1
FBgn0004507	GlyP	2L	2130815	130.632	123.414	119.011	124.352	140.824	156.696	153.823	150.448	126.968	129.982	123.892	126.947	133.607	117.369	125.455	125.477	102.548	112.715	97.4978	104.254	149.534	150.949	139.014	146.499	119.011	125.024	127.375	123.803	111.651	101.039	88.9952	100.562	107.411	101.451	104.669	104.51	93.4811	97.3211	86.3196	92.3739	107.645	111.293	107.926	108.955	0.0336523	0.842182
FBgn0004509	Fur1	3R	21173090	25.3985	20.6028	22.146	22.7158	28.0807	28.2557	21.3528	25.8964	26.7607	24.1821	26.9818	25.9749	22.8692	23.1618	24.634	23.555	22.3866	24.5338	24.1042	23.6749	26.7816	20.1864	21.9551	22.9744	22.146	23.1686	25.2577	23.5241	22.2254	20.3685	19.6973	20.7637	18.3591	17.4222	20.9496	18.9103	21.999	19.189	20.7481	20.6454	19.3504	18.8951	17.6732	18.6396	0.669138	1
FBgn0004510	Ets97D	3R	22736497	2.36008	2.97296	3.34654	2.89319	2.47056	4.94553	2.1491	3.1884	2.33111	4.32851	3.33657	3.33206	2.99518	3.10397	3.39139	3.16351	2.9488	2.27767	3.3865	2.87099	4.7107	3.3491	3.97691	4.01224	3.34654	2.64083	2.46935	2.81891	4.05643	3.38927	3.11189	3.5192	2.57148	3.39328	2.89995	2.9549	3.75728	3.53195	4.42694	3.90539	2.94979	2.36233	4.18094	3.16435	0.428205	1
FBgn0004511	dy	X	11663806	0.170229	0.199119	0.313796	0.227715	0.217179	0.0858757	0.419824	0.24096	0.341534	0.405872	0.391076	0.379494	0.715892	0.296991	0.422346	0.47841	0.611492	0.335612	0.323424	0.423509	0.631015	0.184727	0.588796	0.468179	0.313796	0.337668	0.426529	0.359331	0.365732	0.357529	1.12228	0.61518	0.206675	0.110993	0.131575	0.149748	0.245798	0.282716	0.550646	0.35972	0.129653	0.276887	0.553963	0.320168	0.239787	1
FBgn0004512	Mdr49	2R	8827828	5.34309	4.1585	3.74129	4.41429	5.68643	6.74592	5.5499	5.99408	5.43991	5.97882	5.72973	5.71615	4.22264	4.11027	4.54552	4.29281	4.39711	5.47704	5.67156	5.1819	6.19575	4.59243	5.87534	5.55451	3.74129	3.94697	4.55831	4.08219	5.67855	5.68838	5.40649	5.59114	5.83015	5.15493	6.47996	5.82168	4.67375	5.55178	5.10955	5.11169	4.48607	4.05642	4.02488	4.18912	0.870813	1
FBgn0004513	Mdr65	3L	6233600	13.215	14.0583	14.8116	14.0283	16.3047	14.7323	16.4163	15.8178	15.188	15.404	14.8674	15.1531	11.4264	12.4671	11.7147	11.8694	11.4154	12.369	12.0043	11.9296	10.4322	13.1012	9.68723	11.0735	14.8116	10.9492	10.8621	12.2076	13.495	14.5439	14.664	14.2343	10.036	10.4957	11.5173	10.683	10.6793	11.1092	14.655	12.1478	11.7633	14.9934	14.294	13.6836	0.966551	1
FBgn0004514	Oct-TyrR	3L	22028103	1.55738	2.71947	2.11447	2.13044	2.49772	2.68046	2.89193	2.69004	2.49968	2.8007	3.09229	2.79756	2.78575	2.74905	2.59377	2.70952	2.46095	2.95834	2.50004	2.63978	3.05627	1.89188	3.06304	2.6704	2.11447	2.66522	2.09865	2.29278	2.91832	2.86473	2.94471	2.90925	1.74251	2.0707	2.41183	2.07501	2.55738	2.13388	2.55304	2.41477	2.37232	1.73844	2.47669	2.19582	0.752562	1
FBgn0004516	Gad1	3L	4074069	60.5209	67.9204	66.2293	64.8902	82.038	84.394	73.418	79.95	67.5117	82.5708	74.0212	74.7012	83.2502	75.2143	69.5627	76.0091	73.3314	69.9761	79.0374	74.115	73.0988	68.5245	82.5603	74.7279	66.2293	75.7474	73.0793	71.6853	65.1229	72.8481	74.5417	70.8376	44.2705	56.022	51.6877	50.6601	79.0339	57.8221	77.5833	71.4798	62.203	57.9314	76.215	65.4498	0.763861	1
FBgn0004552	Akh	3L	4141467	0	0	0.580025	0.193342	0	0	0	0	0	0	0	0	0	0	0	0	0	0.225582	0.21739	0.147657	0	0	0.72556	0.241853	0.580025	0	0.450516	0.343514	0	0.293716	0.553186	0.282301	2.03745	0.273547	0.324273	0.878423	0.302891	0.895845	0.313176	0.503971	0.319537	0.341201	0.315063	0.325267	1	1
FBgn0004554	Edg91	3R	13436578	0	2.40873	0.524272	0.977667	0.525424	3.44344	0.60941	1.52609	0.495766	1.17834	0.435593	0.703233	0.199842	0.431117	0	0.21032	0.385919	1.84976	0.426806	0.887495	1.14496	0	1.31164	0.818867	0.524272	1.22542	1.22164	0.990444	0	0.288324	0.271515	0.186613	1.15101	0	0	0.38367	0.594672	0	0.849222	0.481298	0.313671	0.669871	1.23716	0.740234	0.567006	1
FBgn0004556	Dbp73D	3L	16721596	6.56601	5.83467	4.50366	5.63478	4.28588	2.9272	4.06714	3.76007	3.55378	3.4951	3.8588	3.63589	4.89033	4.26247	4.85818	4.67033	3.1957	4.05046	4.16711	3.80442	6.50932	5.46819	4.92947	5.63566	4.50366	5.04821	5.46574	5.00587	4.85537	4.34737	3.08722	4.09665	4.20218	4.04885	4.79965	4.35023	5.87956	4.99953	4.02748	4.96886	5.9701	4.3051	2.98147	4.41889	0.772361	1
FBgn0004567	slp2	2L	3836842	1.14342	2.00621	1.58081	1.57681	2.67443	3.17253	1.69196	2.51297	1.83526	1.90836	1.64177	1.79513	2.08065	1.39641	1.87734	1.7848	2.14297	2.04935	1.2837	1.82534	2.64906	1.86121	2.14225	2.21751	1.58081	1.60657	1.94409	1.71049	1.71962	1.33417	2.19868	1.75082	0.925485	1.18043	1.03108	1.04566	2.06376	1.83117	2.2761	2.05701	1.74175	1.23989	1.43113	1.47092	0.186387	1
FBgn0004569	aos	3L	16463486	5.37878	5.0333	6.4999	5.63733	6.81144	5.78867	6.24943	6.28318	5.7555	5.81376	6.04117	5.87014	4.87205	5.12998	5.19843	5.06682	4.85371	4.41315	4.54192	4.60293	5.75997	3.89125	5.5124	5.05454	6.4999	4.18873	5.39086	5.35983	4.72517	4.63035	5.51618	4.95723	3.33775	3.48109	3.32592	3.38159	4.94757	4.70758	6.18628	5.28048	5.58364	5.63817	4.7275	5.31644	0.809339	1
FBgn0004573	5-HT7	3R	26794864	1.93968	3.32766	3.03921	2.76885	3.05206	2.83768	2.20049	2.69674	1.9458	3.05231	2.07952	2.35921	3.26289	2.87645	3.48192	3.20709	2.48411	3.02453	2.44566	2.65143	4.1343	3.68353	2.23634	3.35139	3.03921	3.14217	3.40205	3.19448	2.54207	2.76117	2.6002	2.63448	1.68772	2.02353	2.49871	2.06999	3.12749	2.20896	3.90939	3.08195	2.60995	2.7869	2.91329	2.77005	0.399958	1
FBgn0004574	Rop	3L	4136359	48.3275	53.6011	51.242	51.0569	55.2172	63.5673	51.2976	56.694	56.8114	56.3351	51.6876	54.9447	45.7906	43.5456	47.7094	45.6819	46.1315	47.9803	44.7966	46.3028	58.4303	60.0147	58.2332	58.8927	51.242	52.9419	52.5696	52.2512	59.1595	56.738	56.8647	57.5874	52.8232	43.5558	43.1104	46.4965	56.9967	49.1601	53.1396	53.0988	51.7965	47.3313	59.0328	52.7202	0.854278	1
FBgn0004575	Syn	3R	6016411	46.2108	53.1693	51.9674	50.4492	66.1492	69.5547	61.6421	65.782	56.771	68.297	65.2553	63.4411	73.222	69.0203	67.4246	69.889	65.0006	66.5296	68.9928	66.841	73.0433	62.4465	68.4244	67.9714	51.9674	70.6409	66.3717	62.9933	45.4325	52.7938	53.3949	50.5404	29.5695	38.6072	38.2185	35.4651	50.8898	38.3388	55.742	48.3235	43.15	36.4318	47.202	42.2613	0.972519	1
FBgn0004577	Pxd	3R	12840340	0	0	0	0	0	0	0	0	0	0	0	0	0.0478139	0	0	0.015938	0	0	0	0	0	0	0.17041	0.0568033	0	0	0	0	0	0	0	0	0.059816	0	0	0.0199387	0	0	0	0	0.0750485	0	0.0739976	0.049682	1	1
FBgn0004580	Cbp53E	2R	12861465	59.2435	58.8785	56.8112	58.3111	57.2501	63.5885	54.7127	58.5171	62.6171	66.4787	58.1092	62.4017	63.2447	59.1127	57.4696	59.9423	53.3114	49.2503	62.7453	55.1023	47.8929	45.1391	55.9516	49.6612	56.8112	54.424	50.2625	53.8326	49.9922	53.5362	52.9082	52.1455	34.6884	42.6824	43.1927	40.1878	61.7	48.8068	62.0388	57.5152	55.2986	46.6778	59.9514	53.9759	0.133821	1
FBgn0004581	bgcn	2R	19740801	0.083887	0	0	0.0279623	0	0	0	0	0	0	0.0642392	0.0214131	0.135686	0.0292707	0	0.0549856	0.0262031	0.0601401	0.0869342	0.0577591	0	0	0	0	0	0	0	0	0	0	0	0	0	0.0364639	0.0432256	0.0265632	0.0403754	0	0	0.0134585	0.0425944	0.0454822	0.0419979	0.0433582	1	1
FBgn0004583	ex	2L	431227	4.81137	4.68932	4.57621	4.6923	4.09092	4.33845	4.17616	4.20184	3.52321	4.83488	3.12429	3.82746	4.56938	4.68947	4.65598	4.63828	4.81788	4.61201	4.40097	4.61029	5.61827	4.93757	4.13848	4.89811	4.57621	4.87676	4.66926	4.70741	4.45332	4.54015	4.15552	4.383	3.38927	3.09856	3.66578	3.38454	4.40433	4.07871	4.89562	4.45955	3.87622	4.17234	4.16191	4.07016	0.712635	1
FBgn0004584	Rrp1	2L	2969773	2.04582	1.49563	1.17849	1.57331	1.79379	2.45113	2.6489	2.29794	1.64185	1.70722	1.46873	1.60593	2.1923	2.43669	2.23934	2.28944	1.83726	1.91038	2.38518	2.04427	1.89585	1.94254	2.28853	2.04231	1.17849	1.77544	2.47149	1.80847	2.14277	1.73067	2.13557	2.003	2.01812	1.27834	2.04248	1.77965	1.29238	1.69886	2.41803	1.80309	1.23357	1.73315	1.98448	1.6504	0.291391	1
FBgn0004587	B52	3R	9487022	53.7211	58.4901	53.7936	55.3349	58.0769	62.9825	51.8606	57.64	48.935	62.1228	55.2125	55.4234	61.6622	57.3614	59.1094	59.3777	55.5394	56.9804	50.2144	54.2447	76.6041	71.1512	67.6053	71.7869	53.7936	67.6798	63.8603	61.7779	52.6564	56.2919	58.0585	55.6689	49.2531	50.3592	47.4674	49.0266	66.0803	52.8143	68.4011	62.4319	51.2392	52.4841	60.0027	54.5753	1	1
FBgn0004588	Eig71Ea	3L	15642226	0	0	0	0	0	0	0	0	0	0	0	0	0	0	0	0	0	0	0	0	0	0	0	0	0	0	0	0	0	0	0	0	0	0	0	0	0	0	0	0	0	0	0	0	1	1
FBgn0004589	Eig71Eb	3L	15643036	0	0	0	0	0	0	0	0	0	0	0	0	0	0.276929	0	0.0923097	0	0	0	0	0	0	0	0	0	0	0	0	0	0	0	0	0	0	0	0	0	0	0	0	0	0	0	0	1	1
FBgn0004590	Eig71Ec	3L	15644579	0	0	0	0	0	0	0	0	0	0	0	0	0	0	0	0	0	0	0	0	0	0	0	0	0	0	0	0	0	0	0	0	0	0	0	0	0	0	0	0	0	0	0	0	1	1
FBgn0004591	Eig71Ed	3L	15645637	0	0	0	0	0	0	0	0	0	0	0	0	0	0	0	0	0	0	0	0	0	0	0	0	0	0	0	0	0	0	0	0	0	0	0	0	0	0	0	0	0	0	0	0	1	1
FBgn0004592	Eig71Ee	3L	15647572	0	0	0	0	0	0	0	0	0	0	0	0	0	0	0	0	0	0	0	0	0	0	0	0	0	0	0	0	0	0	0	0	0	0	0	0	0	0	0	0	0	0	0	0	1	1
FBgn0004593	Eig71Ef	3L	15649755	0	0	0	0	0	0	0	0	0	0	0	0	0	0	0	0	0	0	0	0	0	0	0	0	0	0	0	0	0	0	0	0	0	0	0	0	0	0	0	0	0	0	0	0	1	1
FBgn0004594	Eig71Eg	3L	15650728	0	0	0	0	0	0	0	0	0	0	0	0	0	0	0	0	0	0	0	0	0	0	0	0	0	0	0	0	0	0	0	0	0	0	0	0	0	0	0	0	0	0	0	0	1	1
FBgn0004595	pros	3R	7155624	62.5511	70.0561	66.46	66.3557	71.8522	76.638	67.1013	71.8638	60.3456	72.4415	67.7511	66.8461	92.3832	87.6974	81.0049	87.0285	76.533	77.0534	86.8865	80.1576	65.5706	62.5149	72.5018	66.8624	66.46	69.2481	66.8058	67.5046	46.2366	53.8247	51.9322	50.6645	25.2932	37.8066	37.5824	33.5607	62.4344	47.8089	64.004	58.0824	45.6695	46.4961	59.8643	50.6766	0.623184	1
FBgn0004597	CycC	3R	10714726	4.47756	3.72441	3.85178	4.01792	3.55444	5.42111	2.94471	3.97342	4.31204	2.84685	4.3432	3.83403	4.05573	3.74966	3.65944	3.82161	2.51752	4.06606	3.71217	3.43192	2.21302	4.8589	2.06496	3.04563	3.85178	4.34218	4.48761	4.22719	3.71968	4.73689	5.51032	4.65563	4.83218	3.76285	2.92247	3.83917	4.45383	5.24082	4.90217	4.86561	5.45645	4.85533	4.18448	4.83209	0.924196	1
FBgn0004598	Fur2	X	16267121	19.6433	18.6131	20.1529	19.4698	20.4441	22.6261	20.7696	21.2799	22.8182	22.4015	19.5151	21.5783	18.0936	17.6276	17.722	17.8144	18.0715	19.477	18.7552	18.7679	22.8871	20.4576	20.6008	21.3152	20.1529	20.8228	20.8237	20.5998	19.7199	20.959	18.3168	19.6652	20.3597	20.5971	20.9804	20.6457	20.4548	17.516	19.6004	19.1904	19.9102	16.7591	19.5876	18.7523	0.649899	1
FBgn0004603		2R	1868785	21.3588	21.1431	20.5019	21.0013	22.3126	23.6712	20.8525	22.2788	18.1181	23.3415	22.0721	21.1772	22.4825	20.5101	20.8633	21.2853	18.1829	19.0615	20.9493	19.3979	21.4402	22.066	21.9526	21.8196	20.5019	21.0739	19.0938	20.2232	20.9372	22.7956	20.2505	21.3278	14.8757	16.9809	16.8222	16.2263	20.7731	18.1669	20.8426	19.9275	18.9021	17.0471	19.7798	18.5763	0.544706	1
FBgn0004606	zfh1	3R	26591648	6.80084	7.79636	6.42435	7.00718	6.4765	6.80299	6.19289	6.49079	5.22461	6.09798	4.67381	5.33213	8.02923	7.35155	8.09299	7.82459	5.87033	7.12594	6.28486	6.42704	10.0193	7.63235	8.17609	8.60925	6.42435	7.11021	8.50577	7.34678	4.8205	5.34494	5.21175	5.12573	3.08163	3.68904	4.1034	3.62469	7.07814	5.3233	6.07463	6.15869	4.86988	4.47519	4.30696	4.55068	0.114941	1
FBgn0004607	zfh2	4	522442	10.3212	11.3025	12.0528	11.2255	14.8213	13.8988	12.6749	13.7983	10.1108	12.7698	12.2379	11.7062	14.6405	12.1409	12.164	12.9818	12.4321	11.8566	13.3679	12.5522	10.0738	9.88523	9.68862	9.88255	12.0528	10.9755	9.97938	11.0026	11.1122	12.8679	14.384	12.788	6.03837	8.77115	9.17593	7.99515	13.2175	10.5004	15.0469	12.9216	11.1522	10.7823	11.7472	11.2272	0.136676	1
FBgn0004611	Plc21C	2L	305931	22.6973	24.3722	24.8054	23.9583	26.6094	26.382	27.0788	26.6901	20.8452	27.0213	27.5632	25.1432	25.8135	24.4249	24.3839	24.8741	22.5072	24.7559	25.421	24.228	26.2019	24.0269	26.5056	25.5781	24.8054	27.3456	27.0977	26.4162	26.8258	27.884	25.4513	26.7204	20.4185	22.0546	21.9453	21.4728	32.7238	24.0104	30.3847	29.0396	26.243	23.4355	25.5567	25.0784	0.854115	1
FBgn0004618	gl	3R	14193649	11.1201	12.6131	10.3528	11.362	10.3846	11.4595	9.90604	10.5834	10.1169	10.8321	11.1367	10.6952	9.30225	9.57946	9.56241	9.48137	9.92493	9.4221	9.14265	9.49656	8.95192	8.10497	9.86029	8.97239	10.3528	12.9701	11.5101	11.611	7.87809	9.70654	9.83417	9.1396	5.19754	7.02767	5.63731	5.95417	8.27154	8.81237	11.6045	9.5628	9.41054	8.97454	9.86346	9.41618	0.605098	1
FBgn0004619	GluRIA	3L	6617134	3.80691	3.10673	4.65116	3.85493	4.74392	4.37689	5.06553	4.72878	3.8367	5.40379	4.13561	4.4587	4.46784	4.57198	4.4189	4.48624	5.199	4.2208	4.00636	4.47539	5.57901	3.65077	5.92026	5.05001	4.65116	4.50743	4.62671	4.5951	4.37481	5.04112	5.17527	4.86373	3.11713	3.80985	3.42146	3.44948	5.70992	3.86491	5.94788	5.17424	4.76505	3.93608	4.83129	4.51081	0.96211	1
FBgn0004620	GluRIIA	2L	5555074	2.49014	2.10364	2.10386	2.23255	2.73568	2.82645	3.07062	2.87758	1.91514	3.06753	3.25762	2.74676	2.48378	2.20841	2.15023	2.28081	2.10661	2.08276	1.8996	2.02966	2.30764	1.68888	1.55512	1.85055	2.10386	2.19531	1.93122	2.0768	3.16539	2.71184	3.23778	3.03834	1.97352	2.07462	2.19201	2.08005	1.99753	1.6247	2.5817	2.06798	2.73951	2.02517	2.44142	2.40203	0.942817	1
FBgn0004622	Takr99D	3R	25776518	0.468976	2.5573	1.5139	1.51339	1.5967	2.48617	1.50455	1.86247	1.03392	2.12619	1.61735	1.59249	1.51853	2.20683	1.50419	1.74318	1.53959	1.21987	1.98644	1.58197	1.73853	1.52766	2.84102	2.03574	1.5139	1.7845	2.10014	1.79951	1.66401	1.53354	2.67681	1.95812	1.13973	1.42823	1.26973	1.27923	2.19848	1.6705	2.09828	1.98909	1.72461	1.39965	2.75592	1.96006	0.424375	1
FBgn0004623	Gbeta76C	3L	19680737	176.018	202.211	215.674	197.968	231.903	218.913	203.828	218.215	194.808	237.211	237.162	223.06	202.457	168.759	202.42	191.212	204.113	204.049	196.639	201.6	208.961	213.48	231.854	218.098	215.674	225.768	206.392	215.945	327.943	303.695	333.824	321.821	263.427	250.236	223.25	245.638	296.57	285.614	275.267	285.817	269.993	233.158	272.893	258.681	0.409903	1
FBgn0004629	Cys	3R	10394753	281.193	279.684	244.555	268.477	359.525	381.558	397.739	379.607	483.638	417.098	398.903	433.213	195.742	193.041	218.455	202.413	339.333	336.935	308.475	328.248	232.887	209.826	220.822	221.178	244.555	208.511	211.346	221.471	349.113	301.199	364.334	338.215	503.577	386.306	382.822	424.235	233.102	280.752	257.105	256.986	300.423	248.034	289.803	279.42	0.0242795	0.722487
FBgn0004635	rho	3L	1463792	9.52402	11.2562	11.41	10.7301	11.1291	12.8654	9.3454	11.1133	9.39354	10.2693	13.5588	11.0739	11.3014	11.0436	11.9956	11.4469	10.0361	9.12808	10.5019	9.88869	9.66375	10.4305	11.5625	10.5523	11.41	11.1058	9.94395	10.8199	9.72642	9.08659	8.38719	9.06673	4.90581	8.00415	7.13136	6.68044	10.397	8.05479	10.7577	9.7365	10.0035	8.21726	8.49682	8.90586	0.491074	1
FBgn0004636	R	3L	1859115	61.7429	58.5546	59.2659	59.8545	63.4769	66.9893	59.1262	63.1975	63.2551	64.712	67.3265	65.0979	63.2405	63.7683	64.7762	63.9283	58.3702	58.496	62.2969	59.721	65.0258	72.0435	68.6823	68.5839	59.2659	62.7561	66.6011	62.8744	62.9598	63.7907	47.3135	58.0213	38.8606	45.7643	53.0941	45.9063	61.7255	56.2593	58.1747	58.7198	56.0271	53.1075	54.2403	54.4583	0.308653	1
FBgn0004638	drk	2R	9382727	35.1662	31.2907	31.4247	32.6272	31.1286	30.5391	33.0912	31.5863	24.0217	27.9704	22.1695	24.7205	32.9263	40.2455	40.8221	37.998	19.4342	23.1487	24.1639	22.2489	28.7409	37.4629	36.901	34.3683	31.4247	40.1579	38.6725	36.7517	29.4776	31.1851	25.3485	28.6704	16.2729	17.2131	20.9062	18.1307	34.8416	30.5757	30.0665	31.8279	36.6329	36.7609	31.4269	34.9402	0.00974794	0.431204
FBgn0004643	mit(1)15	X	2498224	3.53542	4.79918	5.43097	4.58852	4.45486	3.96337	3.35848	3.92557	3.25764	4.37084	3.91065	3.84638	3.98181	3.70089	4.2807	3.9878	2.6586	4.08358	3.30202	3.34807	3.64031	4.68913	4.52906	4.28617	5.43097	5.54111	4.68703	5.2197	4.21989	4.40027	4.60415	4.4081	5.6702	4.55345	4.11584	4.77983	4.22259	4.97072	4.43114	4.54148	4.7871	4.40171	4.78562	4.65814	0.805963	1
FBgn0004644	hh	3R	18953891	1.1386	0.887886	0.655893	0.894126	1.08947	0.574389	0.982814	0.882224	0.571097	0.814417	0.653939	0.679818	0.460416	0.993229	0.581598	0.678414	0.444569	0.612211	0.294989	0.45059	0.791364	0.463338	0.656371	0.637024	0.655893	0.564633	0.611333	0.61062	0.611559	0.730696	0.250217	0.530824	0.518388	0.371193	0.513363	0.467648	0.616516	0.337674	0.424968	0.459719	0.578133	0.61733	0.498783	0.564749	0.742356	1
FBgn0004646	ogre	X	6867648	59.0713	57.1356	54.7072	56.9714	67.6113	63.2672	60.2081	63.6955	61.9206	56.825	57.8918	58.8791	58.0421	64.4459	58.4797	60.3226	61.4835	59.7894	61.6596	60.9775	63.1423	57.7959	57.0796	59.3393	54.7072	66.13	57.3388	59.392	70.6744	59.518	49.3633	59.8519	51.5192	55.2101	53.941	53.5568	58.8389	59.729	51.4769	56.6816	61.0453	55.3541	48.305	54.9015	0.495049	1
FBgn0004647	N	X	3028905	5.79343	5.13733	6.71284	5.8812	7.29288	7.24846	5.81313	6.78482	6.3763	6.69343	6.51532	6.52835	5.64388	5.53314	6.43555	5.87086	6.40101	6.06398	5.28341	5.91613	7.60844	5.67612	6.48872	6.59109	6.71284	5.91021	6.47055	6.36453	5.33441	5.51626	6.72223	5.85763	4.55849	4.53292	4.1966	4.42934	5.60871	5.45111	6.12865	5.72949	4.55577	4.81038	5.3203	4.89548	0.970397	1
FBgn0004648	svr	X	390504	69.1396	73.148	68.9175	70.4017	73.8054	76.4927	68.5446	72.9476	63.1424	69.3066	65.0713	65.8401	64.4474	67.982	67.5198	66.6497	55.9716	54.3711	57.7889	56.0439	68.5747	69.5958	70.0362	69.4022	68.9175	68.7549	68.296	68.6561	67.6479	72.066	71.7653	70.4931	48.8968	49.4272	50.6452	49.6564	76.8348	65.4701	74.1202	72.1417	75.7982	76.579	77.2752	76.5508	0.431192	1
FBgn0004649	yl	X	14087252	0.0537559	0	0	0.0179186	0	0.0542365	0	0.0180788	0	0	0	0	0	0	0.109908	0.036636	0	0	0	0	0	0	0.0619777	0.0206592	0	0.142258	0	0.0474193	0	0.0251087	0.0236267	0.0162451	0	0	0	0	0	0.102091	0	0.0340303	0.327774	0	0	0.109258	1	1
FBgn0004650	fs(1)N	X	1216546	0	0.0402423	0	0.0134141	0.0435943	0	0	0.0145314	0	0	0	0	0.0166953	0.0360427	0.044882	0.03254	0	0	0.0178278	0.0059426	0	0	0	0	0	0	0	0	0.044385	0.0240872	0.022683	0.0303851	0	0	0	0	0.0248396	0.0980608	0.0771239	0.0666748	0.0262048	0.0560048	0	0.0274032	1	1
FBgn0004652	fru	3R	14242315	18.1869	20.7614	20.958	19.9688	20.2417	17.9606	21.2983	19.8335	16.2383	22.8845	22.0693	20.3974	23.7441	21.4209	20.3707	21.8452	21.2179	22.9827	21.2325	21.811	26.9672	22.6617	21.5974	23.7421	20.958	26.9497	23.1042	23.6706	14.407	17.0504	21.1717	17.543	14.7299	16.0056	15.9041	15.5465	22.7012	16.5114	23.4229	20.8785	16.319	15.6928	20.6271	17.5463	0.336364	1
FBgn0004654	Pgd	X	2039169	43.4628	44.6279	44.9117	44.3341	41.6203	52.2415	50.0725	47.9781	44.3025	35.8724	39.1795	39.7848	37.1542	52.4147	46.808	45.459	31.5096	35.9554	27.8614	31.7755	65.5912	55.52	51.5249	57.5454	44.9117	59.6351	73.3984	59.3151	66.474	52.8499	33.0725	50.7988	63.3388	56.6023	50.5499	56.8303	49.1401	54.8827	42.9719	48.9982	62.9242	52.5175	43.3321	52.9246	0.165465	1
FBgn0004655	wapl	X	2044135	5.93172	6.57252	6.83044	6.44489	7.86805	7.73108	5.59333	7.06415	5.94738	6.29709	6.33251	6.19233	6.25068	5.66189	6.41185	6.10814	6.73427	6.12338	5.52341	6.12702	7.65058	8.36857	6.56433	7.52783	6.83044	7.79299	6.82847	7.15063	7.30763	6.76346	6.26433	6.77847	5.29899	5.94198	5.92309	5.72135	6.37632	6.77841	7.87668	7.01047	5.64704	6.11037	7.22821	6.32854	0.646358	1
FBgn0004656	fs(1)h	X	7933976	34.9084	36.4212	34.6551	35.3282	40.5348	40.3059	38.3516	39.7308	32.6372	41.141	39.5985	37.7922	38.7288	33.7286	37.0819	36.5131	36.6029	38.031	37.5024	37.3788	45.499	36.539	38.8107	40.2829	34.6551	41.9542	38.1747	38.2613	32.3364	34.2269	30.6344	32.3992	24.0437	25.93	27.5397	25.8378	37.0154	31.8306	39.638	36.1613	29.3321	28.5585	32.7068	30.1991	0.894232	1
FBgn0004657	mys	X	7955680	20.1217	16.1468	17.6994	17.9893	17.3983	16.5108	17.5436	17.1509	15.6792	18.9513	17.5827	17.4044	17.016	15.6736	16.9374	16.5423	15.3611	16.1315	16.036	15.8429	19.1886	19.4797	18.4824	19.0502	17.6994	18.8803	18.9475	18.5091	15.8214	15.1976	17.0639	16.0276	14.5294	12.1942	11.4009	12.7082	16.034	16.5208	16.8278	16.4609	16.4065	15.2554	17.0128	16.2249	0.4554	1
FBgn0004666	sim	3R	8883481	0.576395	0.852072	0.850011	0.759493	1.19213	1.6341	0.587905	1.13804	0.647603	0.947278	0.712568	0.76915	0.490239	0.52292	0.775633	0.596264	0.686002	0.371907	0.377454	0.478454	0.640979	1.07789	0.664553	0.794474	0.850011	0.656768	0.666142	0.724307	0.584438	0.863587	0.666063	0.704696	0.839766	0.38858	0.594017	0.607454	0.812705	0.932707	0.543727	0.763046	0.998057	0.566889	0.758701	0.774549	0.246707	1
FBgn0004687	Mlc-c	X	5513169	58.382	51.7203	58.0101	56.0375	56.4804	40.2065	41.6428	46.1099	46.9276	52.1141	48.9095	49.3171	43.9135	44.8546	42.0355	43.6012	41.3157	42.5271	43.9728	42.6052	51.5558	54.1567	58.2101	54.6409	58.0101	46.8321	58.0355	54.2926	46.6308	49.1007	50.8397	48.8571	36.2715	37.6267	40.262	38.0534	52.7238	49.7087	56.8984	53.1103	58.4693	53.8547	66.0889	59.471	0.252686	1
FBgn0004698	mus210	2R	11198991	20.9163	20.5672	15.9427	19.1421	24.7942	21.2796	24.5778	23.5505	18.4677	24.144	22.4534	21.6884	21.0965	17.3748	21.1801	19.8838	17.9923	17.7845	18.1844	17.9871	15.5636	18.6239	19.5966	17.928	15.9427	16.1522	21.252	17.7823	21.9035	21.4828	20.6894	21.3586	17.5194	14.9929	16.1835	16.2319	21.4891	17.1373	21.8472	20.1579	22.3787	19.2735	18.6085	20.0869	0.591594	1
FBgn0004777	Ccp84Ag	3R	2512450	0	0	0	0	0	0	0	0	0.740292	0.586499	0.235466	0.520752	0.0994699	0.536452	0.179501	0.271808	0	0.11022	0	0.03674	0	0.333671	0	0.111224	0	0	0.220124	0.0733747	0.528494	0.287022	0	0.271839	0	0.133657	0.158441	0.097366	0	0	0	0	0	0.166713	0.307883	0.158199	0.0671284	1
FBgn0004778	Ccp84Af	3R	2515324	0	0	0	0	0	0	0	0	0	0	0	0	0	0	0	0	0	0	0	0	0	0	0	0	0	0	0	0	0	0	0	0	0	0	0	0	0	0	0	0	0	0	0	0	1	1
FBgn0004779	Ccp84Ae	3R	2516609	0	0	0	0	0	0	0	0	0	0.426651	0	0.142217	0	0	0	0	0	0	0	0	0	0	0	0	0	0	0	0	0	0	0	0	0	0	0	0	0	0	0	0	0	0	0	0	1	1
FBgn0004780	Ccp84Ad	3R	2518454	0	0	0	0	0	0	0	0	0	0	0	0	0	0.108228	0	0.036076	0	0	0	0	0	0	0	0	0	0	0	0	0	0.0723824	0	0.0241275	0.0627627	0	0	0.0209209	0	0	0	0	0	0	0	0	1	1
FBgn0004781	Ccp84Ac	3R	2520870	0	0	0	0	0	0	0	0	0	0	0	0	0	0	0	0	0	0	0	0	0	0	0	0	0	0	0	0	0	0	0	0	0	0	0	0	0	0	0	0	0	0	0	0	1	1
FBgn0004782	Ccp84Ab	3R	2527689	0	0	0	0	0	0	0	0	0	0	0	0	0.261362	0.446358	0.589558	0.432426	0.126183	0.0724022	0.139546	0.11271	0	0	0	0	0	0	0	0	0	0.062847	0	0.020949	0.0544946	0.175594	0	0.0766962	0	0.0958429	0	0.0319476	0.205116	0	0.101122	0.102079	1	1
FBgn0004783	Ccp84Aa	3R	2529804	0	0	0	0	0.374047	0	0	0.124682	0.352934	0	0	0.117645	0.142267	0.485931	0	0.209399	0.27474	0.0788212	0	0.117854	0	0	0	0	0	0	0	0	0.188969	0.0684189	0	0.085796	0.0593259	0.191162	0	0.083496	0	0.10434	0	0.03478	0	0	0.110087	0.0366957	1	1
FBgn0004784	inaC	2R	12786088	145.836	164.711	164.614	158.387	192.465	173.705	170.85	179.007	166.693	177.867	185.384	176.648	152.084	133.877	158.102	148.021	165.537	159.083	147.697	157.439	136.91	139.367	149.59	141.956	164.614	166.45	154.981	162.015	187.994	173.339	182.199	181.177	147.697	181.337	158.359	162.464	174.318	151.243	172.958	166.173	166.816	149.257	174	163.358	0.601762	1
FBgn0004795	retn	2R	19520135	8.63834	9.32187	10.1481	9.36944	9.16401	8.80747	9.84249	9.27132	9.02542	8.77534	8.60577	8.80218	8.3448	7.16229	8.17216	7.89308	7.71366	7.71469	6.95484	7.46106	10.4946	12.1059	10.2461	10.9489	10.1481	8.78806	10.2388	9.72499	6.9952	8.25883	8.67607	7.9767	5.4107	4.95689	4.944	5.10386	7.00271	7.42631	7.71015	7.37972	4.57633	4.39194	7.16599	5.37809	1	1
FBgn0004797	mdy	2L	16816660	46.9178	48.8905	45.4414	47.0832	43.0227	49.411	43.5385	45.3241	47.8885	32.2012	36.2888	38.7928	43.0666	45.2213	39.1068	42.4649	38.2264	37.0804	39.1531	38.1533	39.3473	41.7087	39.3406	40.1322	45.4414	40.7402	33.8185	40	51.8567	58.484	37.0827	49.1411	46.5888	52.2892	57.7023	52.1934	44.4488	50.4673	39.9341	44.9501	55.2452	67.5036	50.433	57.7273	0.221971	1
FBgn0004811	fs(2)ltoPP43	2L	19792773	10.6898	10.5018	7.76764	9.65308	10.7705	8.99038	8.30848	9.35645	5.80166	9.03391	9.05349	7.96302	9.21984	7.36287	8.37476	8.31916	8.34235	9.6825	6.42051	8.14845	14.2414	7.71291	11.1566	11.037	7.76764	9.18069	11.9765	9.64161	11.8782	10.8638	7.11657	9.95286	9.0468	9.79891	8.45181	9.09917	11.419	9.36396	8.60235	9.7951	11.5408	12.4366	11.9104	11.9626	0.882703	1
FBgn0004828	His3.3B	X	9047271	446.169	440.295	449.784	445.416	488.908	453.709	454.192	465.603	439.415	456.391	415.701	437.169	380.745	386.9	396.931	388.192	386.259	376.329	389.165	383.918	374.915	370.148	396.385	380.483	449.784	380.982	386.049	405.605	447.347	398.289	418.021	421.219	317.078	326.066	293.326	312.157	442.431	390.862	434.751	422.681	445.848	386.612	434.663	422.374	0.751503	1
FBgn0004832	Xpac	X	3997047	2.11007	1.88051	3.05615	2.34891	2.56384	2.43307	2.37893	2.45861	2.17721	3.44981	2.30836	2.64513	2.24283	2.73471	2.11166	2.36307	2.25979	3.99798	1.04129	2.43302	7.26301	2.61689	0.695085	3.525	3.05615	4.18555	4.31593	3.85254	1.42478	3.51724	1.98732	2.30978	2.43984	2.48955	2.01924	2.31621	2.90169	3.1468	2.55019	2.86623	2.14281	3.43214	3.01829	2.86441	1	1
FBgn0004837	Su(H)	2L	15039496	5.04302	5.8095	5.81011	5.55421	7.11629	5.66631	5.87942	6.22067	5.88679	6.44919	5.35394	5.89664	5.15374	4.1992	5.62034	4.99109	4.18873	5.38207	5.3054	4.95873	4.24857	4.6019	3.83218	4.22755	5.81011	3.41024	5.90768	5.04268	4.97414	4.70744	4.73526	4.80561	3.94266	3.33796	3.66165	3.64742	4.19251	5.22104	4.96229	4.79195	3.95735	3.16924	3.84456	3.65705	0.851119	1
FBgn0004838	Hrb27C	2L	6920704	199.611	198.133	187.626	195.123	207.904	212.883	197.32	206.036	204.312	202.207	190.219	198.913	203.593	190.607	210.062	201.421	188.829	191.428	192.892	191.05	216.709	204.997	203.886	208.531	187.626	209.285	194.557	197.156	166.786	166.99	129.577	154.451	111.81	145.503	153.366	136.893	174.795	152.407	166.578	164.593	158.163	163.967	165.085	162.405	0.820127	1
FBgn0004839	otk	2R	7888983	0.363167	0.45312	0.803342	0.539876	0.864883	0.659545	0.214957	0.579795	0.291452	0.554168	0.38935	0.411657	0.63441	0.785664	0.530018	0.650031	0.476447	0.729011	0.677447	0.627635	0.673103	0.472916	0.418712	0.521577	0.803342	0.432229	0.675968	0.63718	0.686621	0.678001	0.574627	0.646416	0.44092	0.694589	0.598829	0.578113	0.839015	0.654844	1.01209	0.835316	0.405683	0.787614	0.909095	0.700797	0.401483	1
FBgn0004841	Takr86C	3R	6563314	0.76113	2.37967	0.350759	1.16385	1.41755	1.54292	1.70993	1.5568	1.17587	0.99881	1.04193	1.0722	1.07314	0.973607	0.714129	0.920292	0.481024	0.93242	0.614603	0.676016	1.35782	0.757335	1.20743	1.10753	0.350759	1.35341	0.726515	0.810228	1.22796	2.50047	0.792654	1.50703	0.770076	0.759808	0.793514	0.774466	1.28041	0.74492	1.05249	1.02594	1.68201	1.00648	1.40431	1.36427	0.356711	1
FBgn0004842	NepYr	3R	22822702	0.159938	0.124721	0	0.0948863	0.272066	0.161368	0.157777	0.19707	0.385064	0.457602	0.244956	0.362541	0.258697	0.223229	0.233419	0.238448	0.649462	0.458651	0.441995	0.516703	0.296433	0.694239	0.553201	0.514624	0	0.528758	0	0.176253	0.412345	0.223943	0.351479	0.329256	0.129454	0.0695217	0.0824136	0.0937964	0.153959	0.227678	0.795933	0.392523	0.24363	0.173432	0.320291	0.245784	0.559005	1
FBgn0004852	Ac76E	3L	19932387	13.3996	12.5232	11.9343	12.619	9.39079	10.1793	8.59303	9.38771	9.74622	13.0308	11.1235	11.3002	13.0332	11.8114	12.4503	12.4316	14.2485	12.4226	14.9669	13.8793	14.3599	15.1369	13.1583	14.2184	11.9343	13.7292	13.7011	13.1215	9.92976	10.6627	10.1289	10.2405	14.5308	16.3765	14.7545	15.2206	13.6598	13.5754	13.4879	13.5744	12.4296	11.7719	11.8141	12.0052	0.0231522	0.703628
FBgn0004854	B-H2	X	17208614	1.96555	1.19214	1.40903	1.52224	1.39314	1.21191	1.72355	1.44287	1.5774	1.45799	1.33794	1.45778	1.73092	0.914452	1.46617	1.37051	1.56902	1.21342	1.84834	1.54359	1.61911	1.06647	0.629492	1.10502	1.40903	1.22742	1.56346	1.39997	1.5484	1.27413	1.58381	1.46878	0.972223	0.949313	1.35042	1.09065	1.1037	1.03631	1.35855	1.16619	1.66337	0.947278	1.36673	1.32579	0.771358	1
FBgn0004855	RpII15	3R	10134797	8.57541	7.35766	8.26153	8.06487	10.0724	11.0298	8.92955	10.0106	12.8726	12.7224	7.25016	10.9484	7.69216	10.1098	8.53749	8.77982	9.13636	6.9334	11.0817	9.05049	9.71321	12.2866	15.3799	12.4599	8.26153	12.4774	8.46754	9.73549	11.3862	11.5316	12.6482	11.8553	10.3535	10.3226	6.35393	9.01001	10.7005	14.103	10.3732	11.7256	8.87445	7.4574	12.5623	9.63138	0.467653	1
FBgn0004856	Bx42	X	8998351	12.5857	11.985	15.1144	13.2284	11.7783	12.2094	10.0421	11.3433	14.3896	9.99453	9.02394	11.136	9.77797	9.74616	10.8328	10.119	10.4644	9.77691	9.31584	9.85238	11.8118	13.1022	15.5045	13.4728	15.1144	14.9169	10.4064	13.4792	12.2421	11.2109	10.9609	11.4713	11.2464	10.1338	10.1695	10.5166	11.2954	12.6889	11.4868	11.8237	13.0044	12.0675	11.7809	12.2843	0.799563	1
FBgn0004858	elB	2L	14390625	8.92998	8.70457	9.63358	9.08938	10.6161	12.1837	14.0149	12.2716	9.85401	9.00048	8.39261	9.08237	11.7522	9.48946	10.4262	10.556	9.47758	10.2215	8.41305	9.37071	7.5232	7.81849	9.35981	8.23383	9.63358	9.12517	6.97405	8.5776	6.27896	6.34653	7.62678	6.75076	5.01026	5.73429	5.80413	5.51623	6.10519	6.54869	6.51451	6.38946	5.87395	6.21717	6.35054	6.14722	0.0113638	0.465292
FBgn0004859	ci	4	68336	8.25805	9.04556	6.35507	7.88623	9.41322	9.75538	8.71113	9.29324	7.80384	8.62292	9.25705	8.56127	8.05156	8.21065	7.15668	7.8063	7.57011	7.87902	7.76382	7.73765	6.90464	6.59327	5.8275	6.4418	6.35507	8.35017	6.96571	7.22365	8.81128	9.52476	10.4573	9.59778	5.72248	7.08834	9.16477	7.3252	8.34999	8.0518	9.61469	8.67216	7.62181	8.09807	7.60544	7.77511	0.750175	1
FBgn0004860	ph-d	X	2010899	4.10398	5.76055	3.88141	4.58198	5.09937	6.19305	4.33015	5.20752	4.11984	5.54774	4.86442	4.844	4.05212	3.76082	4.2395	4.01748	4.89368	3.72253	4.40261	4.33961	5.90632	4.12523	4.97289	5.00148	3.88141	5.30914	4.77744	4.656	4.04847	4.94682	3.89493	4.29674	3.59523	3.50577	4.45062	3.85054	4.5689	4.18848	5.27561	4.67766	4.00963	3.74566	4.54305	4.09945	0.576782	1
FBgn0004861	ph-p	X	2020243	6.62247	7.51472	6.50258	6.87992	7.32593	8.73225	7.877	7.97839	5.63317	8.80718	6.834	7.09145	6.5694	6.10155	6.00578	6.22558	5.97745	6.63803	6.15907	6.25818	6.95852	6.83409	8.24376	7.34546	6.50258	6.21773	7.38179	6.7007	5.46014	6.85625	6.31965	6.21201	4.81586	4.89691	5.95414	5.2223	7.17218	5.99643	7.96892	7.04584	5.98126	5.19307	6.44971	5.87468	0.299513	1
FBgn0004862	bap	3R	17214605	0	0	0.215002	0.0716673	0	0	0.460239	0.153413	0	0	0	0	0.226387	0	0.272355	0.166247	0.218595	0.0836181	0.161163	0.154459	0	0.253138	0.537898	0.263679	0.215002	0	0	0.0716673	0.100235	0.108874	0	0.069703	0	0.101398	0.120201	0.0738663	0.22455	0	0	0.07485	0	0	0.116787	0.038929	0.51175	1
FBgn0004863	C15	3R	17325977	0.305258	0.714126	0.562703	0.527362	0.778897	0	0.602267	0.460388	0.244978	0.582253	0	0.275744	0.296249	0.106514	0.356403	0.253055	0.0953509	0	0	0.0317836	0	0.662511	0	0.220837	0.562703	0.403674	0.218531	0.394969	0	0.142472	0.268333	0.136935	0.617688	0.132689	0	0.250126	0.146922	0	0.303823	0.150248	0.619989	0.165506	0	0.261832	0.734662	1
FBgn0004864	hop	X	11254932	6.30175	4.13823	4.89115	5.11038	5.02135	4.95262	5.88943	5.2878	4.84439	5.12434	5.74013	5.23629	4.54929	4.53662	5.07287	4.71959	5.2008	4.73185	4.51418	4.81561	5.04076	5.97465	5.81247	5.60929	4.89115	5.43868	6.55334	5.62772	4.67455	5.04649	5.45201	5.05768	4.53688	4.93063	4.23844	4.56865	6.03422	4.87884	6.37117	5.76141	4.91754	4.99919	5.08115	4.99929	0.942272	1
FBgn0004865	Eip78C	3L	21219709	3.76643	5.92387	5.70662	5.13231	6.74064	6.72921	6.22647	6.56544	5.96095	6.91647	7.19773	6.69172	6.18401	6.38072	5.69121	6.08531	5.13897	5.70112	5.79238	5.54416	5.62612	4.81441	6.50887	5.6498	5.70662	6.51472	5.57872	5.93335	4.65062	6.09227	6.22452	5.6558	4.00463	4.19836	4.00533	4.06944	7.28547	4.34541	7.19944	6.27677	5.13273	4.95163	5.42485	5.16974	0.658494	1
FBgn0004867	RpS2	2L	9896265	704.447	721.627	727.659	717.911	628.912	654.251	694.203	659.122	693.3	667.973	582.88	648.051	559.983	563.81	686.595	603.463	683.693	676.763	625.345	661.934	859.278	861.121	784.168	834.856	727.659	696.83	722.057	715.515	777.526	620.439	605.304	667.756	872.853	780.486	652.728	768.689	877.131	814.783	617.755	769.89	930.208	832.761	690.054	817.674	0.768586	1
FBgn0004868	Gdi	2L	9491176	83.7652	87.5982	73.7245	81.696	80.439	94.1358	92.3671	88.9806	84.704	91.4934	85.6557	87.2844	78.0848	76.6931	87.7729	80.8503	83.0172	91.3889	78.4162	84.2741	98.9897	88.7237	87.6702	91.7945	73.7245	88.1382	81.9194	81.2607	92.7834	82.2542	79.945	84.9942	100.928	93.118	79.771	91.2723	88.9383	82.47	75.7449	82.3844	87.609	82.931	82.0236	84.1879	0.550339	1
FBgn0004870	bab1	3L	1036369	1.45813	1.53262	1.69674	1.5625	1.62537	1.91898	1.68296	1.74244	1.57727	1.75345	1.6826	1.67111	1.92721	1.81795	1.73504	1.82673	1.75757	2.50312	2.19901	2.15323	1.2923	1.9402	1.74839	1.6603	1.69674	1.59451	1.61667	1.63597	1.86506	1.72493	2.2489	1.9463	0.923326	1.07114	1.38302	1.12583	2.30185	1.41343	1.76622	1.82717	1.19111	1.41945	2.24247	1.61768	0.893475	1
FBgn0004872	piwi	2L	10982205	0.549543	0.428538	0.405205	0.461095	0.280444	0.332674	0.108424	0.240514	0.529228	0.314462	0.504997	0.449562	0.675546	0.536907	0.256647	0.4897	0.205988	0.590967	0.303736	0.366897	0	0.119269	0	0.0397563	0.405205	0.436031	0.31473	0.385322	0.330588	0.769461	0.531376	0.543808	0.17792	0.3822	0.396439	0.318853	0.740596	0.677989	1.09392	0.837502	0.334843	0.178772	0.825384	0.446333	0.132212	1
FBgn0004875	enc	3L	3818687	20.2242	23.4408	21.6062	21.7571	24.9856	27.598	23.9831	25.5222	23.434	26.2777	23.2921	24.3346	26.4668	22.0282	23.0947	23.8632	24.242	22.9632	23.9815	23.7289	26.7648	21.8317	26.1867	24.9277	21.6062	24.8548	24.4543	23.6384	20.7484	21.5803	21.0183	21.1157	17.2664	18.754	17.76	17.9268	24.309	19.6559	24.3901	22.785	19.4441	17.9975	20.8483	19.43	0.975185	1
FBgn0004876	cdi	3R	14870604	10.3489	10.5761	10.9122	10.6124	12.1257	11.7919	11.4238	11.7805	11.0232	12.704	13.1336	12.2869	10.6614	11.077	12.3399	11.3594	10.9515	11.3064	11.0983	11.1187	12.8276	11.3375	11.6542	11.9398	10.9122	11.8929	10.8697	11.2249	9.72896	10.6044	12.3742	10.9025	6.57694	8.17693	8.36472	7.7062	11.6906	9.83245	12.0515	11.1915	10.2757	9.21774	11.5799	10.3578	0.224469	1
FBgn0004878	cas	3R	1538664	0.0916851	0	0	0.0305617	0.0779815	0	0	0.0259938	0	0.0874408	0.0702109	0.0525506	0	0	0.0267617	0.00892057	0	0.0328654	0	0.0109551	0	0	0	0	0	0	0.131273	0.0437577	0	0	0	0	0	0	0	0	0	0	0	0	0	0.0497102	0	0.0165701	1	1
FBgn0004880	scrt	3L	3983916	46.9817	51.4769	50.2568	49.5718	60.9511	58.9147	52.4704	57.4454	46.295	56.5048	55.3899	52.7299	54.2226	52.2927	49.5916	52.0356	47.271	48.0982	51.7827	49.0506	51.9432	43.7631	53.5675	49.7579	50.2568	53.5763	53.2712	52.3681	39.3692	42.7798	41.5764	41.2418	20.4426	31.6831	29.8015	27.3091	50.127	36.3326	52.5506	46.3367	40.5768	37.1814	48.4756	42.0779	0.494496	1
FBgn0004882	orb	3R	19090364	2.67932	3.72347	3.02636	3.14305	3.94843	3.2917	2.53335	3.25783	3.3876	3.81915	3.28706	3.49794	3.19433	3.39961	3.19641	3.26345	3.12454	2.05792	2.39449	2.52565	3.34458	3.51013	4.10279	3.6525	3.02636	3.26823	3.67759	3.32406	2.9674	4.17847	4.2016	3.78249	2.98459	2.84523	2.77947	2.86976	4.02042	2.21578	3.38492	3.20704	3.00203	2.4211	3.54904	2.99072	0.354631	1
FBgn0004885	tok	3R	20545419	29.4213	28.2262	25.9031	27.8502	27.5931	29.1781	29.8795	28.8836	24.4216	25.8457	26.9499	25.7391	28.5125	29.9599	30.0111	29.4945	25.3557	24.421	24.5091	24.7619	40.6725	41.2671	41.7327	41.2241	25.9031	37.4138	37.0052	33.4407	32.3466	32.8802	26.2765	30.5011	31.1507	28.1136	27.7347	28.9997	33.8469	33.1903	31.0314	32.6895	35.0838	34.4204	32.2963	33.9335	0.429933	1
FBgn0004888	Scsalpha	3L	3814190	124.752	131.074	119.397	125.074	135.397	133.691	130.266	133.118	141.116	142.468	122.254	135.279	101.372	106.159	110.638	106.056	129.37	124.427	118.569	124.122	135.69	122.067	125.163	127.64	119.397	120.789	120.493	120.226	151.656	140.507	125.15	139.104	155.033	123.141	143.015	140.396	114.822	129.65	123.052	122.508	126.688	124.272	126.17	125.71	0.513132	1
FBgn0004889	tws	3R	5952523	38.5711	40.3513	41.0315	39.9846	47.4381	46.2265	42.4547	45.3731	39.1008	36.7369	37.6245	37.8207	43.3089	39.3869	41.7269	41.4742	39.2988	40.0597	37.7787	39.0457	33.6739	32.5773	40.6824	35.6445	41.0315	38.8617	34.6238	38.1723	38.3522	43.1269	41.8381	41.1057	25.1805	27.9172	28.7586	27.2854	39.0137	37.5257	41.1796	39.2397	38.0388	38.9998	36.3226	37.7871	0.0619028	1
FBgn0004892	sob	2L	3578013	0.129188	0	0.357212	0.162133	0.879032	0.391029	0.50977	0.593277	0.414707	0.616037	0.395719	0.475488	0.125376	0.315543	0.301666	0.247528	0.242121	0.185234	0.401642	0.276332	0.47888	0.14019	0.893681	0.50425	0.357212	1.11045	0.554906	0.674189	0.388577	0.54266	0.454244	0.461827	0.261411	0.168466	0.332842	0.25424	0.559611	0.367808	0.385742	0.43772	0.327982	0.490305	0.388066	0.402118	0.716396	1
FBgn0004893	bowl	2L	3771198	4.10687	2.59431	3.68649	3.46256	3.317	4.27144	3.74856	3.779	3.53105	4.20629	3.3707	3.70268	3.03896	3.11808	3.62947	3.26217	4.16169	3.62977	2.87056	3.55401	2.3778	1.82055	3.11279	2.43705	3.68649	3.89515	3.50162	3.69442	3.4452	4.53512	4.00334	3.99455	2.55581	3.00493	2.80494	2.78856	3.69974	3.24711	3.97637	3.64107	3.46697	3.80263	3.2315	3.50037	1	1
FBgn0004895	fd64A	3L	4018878	0	0	0	0	0	0	0	0	0	0	0	0	0	0	0	0	0	0.0855105	0	0.0285035	0	0	0	0	0	0	0	0	0	0	0	0	0	0	0	0	0.118302	0.116632	0	0.0783113	0	0	0	0	1	1
FBgn0004896	fd59A	2R	18754044	1.2215	1.56488	1.20626	1.33088	1.78103	2.37682	0.516429	1.55809	1.6805	1.4978	1.20267	1.46032	1.63706	1.24822	1.06962	1.3183	1.33543	0.906994	0.964476	1.06897	1.13198	1.60958	1.00595	1.24917	1.20626	1.32687	1.24923	1.26079	1.6121	1.18094	1.41888	1.40397	1.0593	1.28948	0.404628	0.917803	1.76375	0.786625	0.998663	1.18301	1.28476	1.18264	1.31045	1.25928	0.887802	1
FBgn0004897	fd96Ca	3R	20909274	0	0	0.277832	0.0926107	0	0	0	0	0	0	0	0	0	0	0	0	0	0.108053	0	0.0360177	0	0.327111	0	0.109037	0.277832	0.199312	0	0.159048	0	0	0.132488	0.0441627	0.121992	0.131029	0.155326	0.136116	0.145084	0	0	0.0483613	0	0	0.150915	0.050305	1	1
FBgn0004898	fd96Cb	3R	20920831	0.40886	0	0.376841	0.2619	0	0	0	0	0.656243	0	0	0.218748	0.132265	0	0.119341	0.0838687	0	0	0	0	0	0	0	0	0.376841	0	0.292699	0.22318	0.175684	0	0	0.0585613	0.330931	0.177723	0.210679	0.239778	0.196787	0.194009	0.610408	0.333735	0.207602	0	0.40939	0.205664	0.515043	1
FBgn0004901	Prat	3R	3735320	1.76392	1.87571	2.21645	1.95203	2.04596	1.7798	0.790989	1.53892	1.92898	1.37646	1.47366	1.59303	2.17952	1.78988	1.40419	1.7912	1.80193	1.14881	1.99276	1.64783	1.78452	2.08667	2.77423	2.21514	2.21645	3.07394	1.49238	2.26092	1.79023	1.9473	1.76074	1.83276	1.75095	1.39412	1.32112	1.48873	1.77584	1.36866	2.23285	1.79245	1.38319	1.56533	1.44541	1.46464	1	1
FBgn0004903	Rb97D	3R	22697851	14.1539	13.871	14.6177	14.2142	17.2292	14.8537	9.84129	13.9747	11.8208	13.0737	14.3104	13.0683	13.0308	12.3205	11.1969	12.1827	11.889	12.0943	12.3992	12.1275	14.3626	14.5929	14.615	14.5235	14.6177	15.0082	13.3401	14.322	12.3332	10.9387	11.0819	11.4513	7.90879	10.7601	10.6398	9.76956	14.0777	11.0602	13.8148	12.9842	11.0586	10.8096	13.5433	11.8038	0.760059	1
FBgn0004907	14-3-3zeta	2R	5987184	567.442	569.752	556.382	564.525	614.871	562.147	548.859	575.292	536.139	568.096	539.56	547.932	531.721	526.205	544.231	534.052	479.755	494.834	487.255	487.281	526.402	527.615	495.7	516.572	556.382	520.888	499.8	525.69	576.497	544.76	526.041	549.099	396.952	457.116	462.308	438.792	575.804	474.557	550.332	533.564	516.012	509.711	551.766	525.83	0.906961	1
FBgn0004908	Arl2	3R	4166822	5.65611	10.8262	8.05669	8.17967	5.24806	5.70668	5.07245	5.3424	9.07836	5.88466	5.11887	6.69396	8.15062	6.45901	8.25471	7.62145	7.06702	5.5295	5.86157	6.1527	5.71809	8.36976	4.14985	6.07923	8.05669	6.11972	3.31294	5.82978	6.40738	9.35951	7.45789	7.74159	3.95377	7.82278	5.829	5.86852	8.66193	4.8798	5.62953	6.39042	9.39907	6.69088	9.26745	8.45247	0.377869	1
FBgn0004910	Eip63F-1	3L	3909973	20.6872	25.1505	17.6095	21.1491	28.4847	24.8848	24.3874	25.919	21.2613	26.8294	21.8893	23.3267	24.6188	24.9408	20.9454	23.5017	21.0791	24.9879	23.8547	23.3072	25.5883	16.1431	22.3846	21.372	17.6095	19.1572	20.6591	19.1419	18.1591	22.9988	24.7718	21.9766	12.8207	16.631	14.6598	14.7038	19.1008	17.2534	23.5691	19.9744	16.8581	14.4744	18.5399	16.6241	0.469911	1
FBgn0004911	Eip63F-2	3L	3934718	0.264557	1.03152	0.243838	0.513305	0.675044	0.533844	0	0.402963	0.636942	0.756928	1.01296	0.802277	0.256749	0.553871	0.308882	0.373167	0.578462	0.284498	0.731111	0.531357	0.980671	0.574176	0.915059	0.823302	0.243838	0.349851	0.378787	0.324159	0.341034	0.61738	1.0465	0.668305	0.214132	0.689983	0.545287	0.483134	1.01866	0.502141	1.18491	0.901904	0.805986	0.573754	0.529799	0.636513	0.165168	1
FBgn0004913	Gnf1	3R	732348	5.15859	5.82883	4.26941	5.08561	5.55163	5.20468	5.08891	5.28174	5.23827	4.91976	3.95037	4.7028	4.93032	5.24661	4.05625	4.74439	4.49086	4.98138	5.09142	4.85455	6.04877	5.71219	6.16823	5.9764	4.26941	5.05886	5.27569	4.86799	4.43322	4.71706	5.90614	5.01881	3.81693	3.64923	4.55682	4.00766	4.30702	4.54595	4.55805	4.47034	4.86446	4.28099	4.37468	4.50671	0.584174	1
FBgn0004914	Hnf4	2L	8687281	29.7982	27.3385	25.7096	27.6154	27.346	28.537	28.8401	28.241	34.4447	33.5279	33.5004	33.8243	26.3432	27.3943	28.9679	27.5685	25.4116	27.54	23.3583	25.4366	31.5957	28.8474	27.3214	29.2548	25.7096	25.0728	26.0683	25.6169	31.319	34.2779	28.8651	31.4873	30.2472	26.8189	32.9036	29.9899	29.9456	31.4128	26.3248	29.2277	28.0272	34.1405	28.3597	30.1758	0.00459229	0.250928
FBgn0004915	TfIIB	2L	10431344	8.37292	8.95442	11.9065	9.74461	12.2082	11.3442	11.0917	11.548	8.63936	9.35423	8.42699	8.80686	7.42934	8.59776	8.58873	8.20528	8.36924	8.31804	8.5118	8.39969	10.6413	8.04761	8.27445	8.98779	11.9065	7.90886	9.07676	9.63071	11.8213	10.3838	12.1968	11.4673	11.0369	10.1907	8.87541	10.0343	10.593	10.6705	11.3099	10.8578	11.6611	9.59816	8.98263	10.0806	0.083707	1
FBgn0004919	gol	2R	20960150	51.5209	53.1985	55.0168	53.2454	57.4668	48.3731	51.6424	52.4941	42.2129	53.1351	54.038	49.7953	49.9726	46.7527	50.967	49.2308	49.276	47.7319	45.9867	47.6649	59.0838	61.3047	60.6684	60.3523	55.0168	55.5561	57.6554	56.0761	50.6641	60.0139	84.8047	65.1609	29.2296	30.0507	32.9079	30.7294	57.2568	61.6613	71.7736	63.5639	45.4998	50.0303	66.101	53.877	0.949763	1
FBgn0004921	Ggamma1	2R	4788908	390.954	405.256	367.081	387.764	428.291	414.602	399.74	414.211	396.909	436.028	390.256	407.731	353.541	360.824	340.946	351.77	325.443	338.253	356.262	339.986	383.889	343.409	382.095	369.798	367.081	365.771	368.538	367.13	367.125	373.802	410.815	383.914	264.144	285.64	310.538	286.774	382.241	338.297	396.969	372.502	379.981	349.761	419.22	382.987	0.940893	1
FBgn0004924	Top1	X	15213525	26.6051	26.4432	25.799	26.2824	29.4867	28.9005	26.8992	28.4288	29.065	27.4468	27.6065	28.0394	31.8702	28.4614	31.1595	30.497	27.7521	27.5559	27.2299	27.5126	27.0608	25.4207	33.3984	28.6266	25.799	27.9267	28.8735	27.5331	23.8343	25.785	21.38	23.6664	19.3035	23.6206	24.9155	22.6132	27.8896	23.5548	24.572	25.3388	23.7828	22.3346	25.7326	23.95	0.864966	1
FBgn0004926	eIF-2beta	3L	12518193	72.2806	59.6123	58.3953	63.4294	51.1046	50.4186	57.2194	52.9142	65.646	53.8994	49.2011	56.2488	79.5776	81.5787	87.0825	82.7463	67.1757	71.758	63.0898	67.3412	79.3877	82.6328	77.1627	79.7277	58.3953	73.5566	70.4839	67.4786	62.5003	53.0326	53.7322	56.4217	70.4213	81.5856	74.0303	75.3457	63.7085	62.3858	60.987	62.3604	69.0223	82.0881	74.0125	75.041	0.263903	1
FBgn0004956	os	X	18199387	0	0	0	0	0	0.138523	0	0.0461743	0	0	0.102502	0.0341673	0.0444147	0.0479225	0.0400749	0.0441374	0	0	0	0	0	0	0	0	0	0	0.0982887	0.0327629	0	0	0	0	0	0	0	0	0.0660814	0	0	0.0220271	0.0697132	0	0	0.0232377	1	1
FBgn0004957	por	X	18271554	4.33403	5.47749	5.93815	5.24989	5.72005	6.05109	6.33955	6.0369	4.91743	3.70579	6.40898	5.01073	4.40335	5.89269	5.54788	5.28131	5.27513	3.89093	5.14954	4.77187	4.70888	5.67625	5.53083	5.30532	5.93815	6.73006	4.70753	5.79191	3.48203	4.42431	3.94336	3.9499	2.78804	2.46859	2.47294	2.57652	3.60304	4.18999	3.65212	3.81505	4.78702	3.97872	4.43235	4.39936	0.443507	1
FBgn0004959	phm	X	18579802	0	0.264225	0.312299	0.192175	0.144095	0.170932	0	0.105009	0.271924	0.484723	0.259473	0.338707	0.0548059	0.236459	0.346155	0.212473	0.0529195	0.182187	0	0.0783688	0	0	0.195329	0.0651097	0.312299	0	0.242568	0.184956	0.0727973	0.316287	0.074462	0.154515	0.274252	0.36821	0.523788	0.38875	0.244625	0.160781	0.505863	0.303756	0.172046	0.367421	0.254455	0.264641	0.18878	1
FBgn0005198	gig	3L	20122281	6.99534	7.12627	5.90136	6.67432	8.23067	6.63622	6.48854	7.11848	6.50288	7.0607	7.7559	7.10649	6.76628	6.13368	6.69401	6.53132	6.56359	6.30119	6.73604	6.53361	8.20564	6.63227	8.65716	7.83169	5.90136	8.9811	7.75059	7.54435	6.31245	6.46571	6.9586	6.57892	7.01979	6.17354	6.62849	6.60727	7.70659	7.89932	8.0238	7.87657	7.68442	6.46962	7.52518	7.22641	0.727834	1
FBgn0005278	Sam-S	2L	106903	133.131	135.443	148.432	139.002	125.872	115.333	120.848	120.684	101.805	98.3782	113.156	104.446	134.947	163.574	151.526	150.016	115.768	115.394	121.964	117.709	196.894	189.521	190.776	192.397	148.432	175.621	181.283	168.445	184.505	178.118	134.646	165.756	122.945	129.262	133.295	128.501	205.723	178.092	186.154	189.99	169.186	127.651	108.858	135.232	0.284527	1
FBgn0005322	nmd	2L	10302592	17.6711	19.8594	20.359	19.2965	23.871	16.7803	15.8942	18.8485	16.6841	16.3573	18.9053	17.3156	19.3353	17.3191	18.8114	18.4886	16.9652	15.6496	17.7744	16.7964	15.8944	20.0221	24.868	20.2615	20.359	20.1036	16.7434	19.0687	20.8811	20.619	22.9576	21.4859	18.8252	18.1865	17.5417	18.1845	21.0129	19.9764	21.2091	20.7328	19.9246	20.2891	20.5563	20.2567	0.68483	1
FBgn0005355	Su(fu)	3R	8515595	4.39969	4.43159	2.87239	3.90122	3.74209	3.69919	5.787	4.40943	3.53087	3.67151	4.07112	3.75783	4.03264	3.26227	4.44123	3.91205	3.89384	4.27134	3.98957	4.05158	4.75679	2.78507	5.49533	4.34573	2.87239	4.24242	3.80588	3.64023	5.04137	4.19248	4.67322	4.63569	3.85786	4.78113	3.77848	4.13916	4.4999	3.74048	4.56147	4.26728	4.09563	4.4727	4.03828	4.2022	0.629456	1
FBgn0005386	ash1	3L	19583873	4.79334	6.16058	4.58139	5.17844	5.88886	5.6868	5.95431	5.84332	4.41668	6.37901	5.60795	5.46788	5.12563	4.56851	5.07821	4.92412	4.977	4.75692	4.61484	4.78292	4.77068	5.87585	4.69848	5.115	4.58139	5.75168	5.2742	5.20242	4.90124	5.84155	5.75459	5.49913	3.51833	4.12854	4.48246	4.04311	5.68222	4.88596	6.58196	5.71671	5.00283	3.87425	5.68837	4.85515	0.762541	1
FBgn0005390	fs(1)M3	X	5852244	0.0602769	0	0.0555564	0.0386111	0.0512677	0.121632	0.297313	0.156738	0.193495	0.0574865	0.138477	0.12982	0.0974969	0.231357	0.281505	0.203453	0.0564847	0.108034	0.0624665	0.0756617	0.111719	0.0654105	0	0.0590432	0.0555564	0	0.0431516	0.0329027	0.0259005	0.168797	0.18545	0.126716	0	0.0524022	0.217418	0.0899401	0.145058	0.114409	0.209978	0.156482	0.0918184	0	0.0603551	0.0507245	1	1
FBgn0005391	Yp2	X	9945049	12218.5	11471	9758.01	11149.2	8283.16	10695.8	10002.1	9660.35	10133.9	8997.71	9294.02	9475.21	16569	19128.1	20026.3	18574.5	13513.1	13968	13023.9	13501.7	20622	18756.8	18017.1	19132	9758.01	16824.5	18985.8	15189.4	15331.8	15460.3	9266.49	13352.9	25225.9	20508.2	18697.7	21477.3	12199.6	15666.3	11576.3	13147.4	11363	12869.2	11130.1	11787.4	0.794933	1
FBgn0005410		X	13089532	10.2754	12.1785	13.8514	12.1018	15.5392	14.8914	14.6482	15.0263	13.4903	17.2897	14.5027	15.0942	13.0272	13.1474	10.9747	12.3831	12.5817	12.8573	13.8167	13.0852	14.5555	13.4163	17.2774	15.0831	13.8514	13.4	14.1135	13.7883	12.7653	13.3714	14.0394	13.392	8.57088	10.4468	10.6084	9.87536	15.3318	12.9576	15.1157	14.4684	11.646	11.1494	12.5549	11.7834	0.901404	1
FBgn0005411	U2af50	X	16250729	15.9776	15.5929	18.1776	16.5827	21.4619	21.7734	19.5213	20.9189	16.6203	20.6821	16.9764	18.0929	18.6421	20.8551	19.1819	19.5597	16.5985	18.0899	19.0655	17.918	30.0781	21.7034	18.9374	23.573	18.1776	20.9341	20.2757	19.7958	22.4156	21.6653	23.5886	22.5565	18.4133	19.513	18.3764	18.7676	21.7688	20.7447	23.8176	22.1104	21.9624	20.2633	19.9901	20.7386	0.444016	1
FBgn0005427	ewg	X	162542	22.722	22.1878	21.3016	22.0705	24.4113	20.8544	20.4288	21.8982	19.345	21.7832	20.6702	20.5995	19.7705	21.0814	21.5943	20.8154	19.0999	18.1018	18.9817	18.7278	20.9669	18.1462	21.4373	20.1835	21.3016	24.392	19.9822	21.8919	19.3065	20.528	18.0523	19.2956	12.1022	16.2751	16.0296	14.8023	22.1353	18.231	21.4283	20.5982	18.3819	14.8144	17.8421	17.0128	0.453145	1
FBgn0005533	RpS17	3L	9421895	685.337	643.579	639.801	656.239	639.747	674.29	686.652	666.896	739.745	685.48	651.317	692.181	500.517	516.109	567.55	528.059	645.765	608.627	616.798	623.73	718.662	716.338	737.82	724.273	639.801	655.75	664.399	653.317	738.785	637.084	610.196	662.022	1129.83	782.985	660.804	857.873	784.435	759.6	607.756	717.264	813.462	722.99	664.289	733.58	0.211107	1
FBgn0005536	Mbs	3L	16045068	50.0809	48.0249	50.7032	49.603	41.9115	47.9914	41.7247	43.8759	29.5546	38.2876	38.4265	35.4229	47.1027	42.9596	44.1286	44.7303	37.9574	37.2401	33.2459	36.1478	66.6918	54.0238	59.7755	60.1637	50.7032	57.4149	60.2371	56.1184	33.5313	38.9226	43.5749	38.6763	23.8098	29.306	27.7901	26.9686	47.1357	37.176	53.0225	45.7781	36.2481	33.93	41.9336	37.3706	0.049879	0.971709
FBgn0005558	ey	4	718315	6.36535	8.15175	8.01421	7.51044	7.8821	6.68073	8.14597	7.5696	6.528	7.78374	5.55369	6.62181	7.41182	6.7547	5.90874	6.69175	5.57805	5.67607	5.25319	5.50244	8.29265	7.4981	6.0802	7.29032	8.01421	7.9509	6.20608	7.3904	7.1506	6.83134	7.28004	7.08733	5.7001	5.96848	3.90869	5.19242	7.52397	7.06675	9.30393	7.96488	7.17516	6.84975	6.43553	6.82015	0.654818	1
FBgn0005561	sv	4	1109444	10.5401	8.69225	9.71822	9.65019	10.4123	9.74699	9.26013	9.80647	10.0457	10.9824	8.2622	9.76343	8.4258	10.3418	9.58875	9.45212	8.34866	8.36227	8.87567	8.52887	11.7035	11.83	8.58081	10.7048	9.71822	10.1657	9.78786	9.89059	6.46711	8.79044	10.1964	8.48465	4.82314	6.89318	5.89911	5.87181	8.37091	7.00957	10.7408	8.70709	6.98237	7.15733	10.9122	8.35063	0.577771	1
FBgn0005564	Shal	3L	19561538	13.5682	14.3568	14.6276	14.1842	16.7293	16.1532	15.5035	16.1287	12.6746	17.1669	13.8549	14.5655	14.8433	14.0479	13.7931	14.2281	13.3902	13.6008	13.4275	13.4728	13.1751	13.6138	14.6245	13.8045	14.6276	15.573	14.7985	14.9997	13.8862	14.4841	14.1676	14.1793	7.7276	11.1457	10.5723	9.8152	15.4425	12.3637	17.7565	15.1876	14.3949	12.2812	14.1864	13.6208	0.611156	1
FBgn0005585	Crc	3R	5454660	265.885	254.592	224.676	248.384	258.871	252.455	238.655	249.994	259.976	238.414	234.31	244.233	251.256	260.237	258.918	256.804	195.684	211.596	200.967	202.749	359.99	348.786	322.755	343.844	224.676	294.479	279.413	266.189	188.302	176.466	160.71	175.159	241.408	236.257	220.706	232.79	174.437	167.82	178.87	173.709	215.728	210.991	245.12	223.946	0.725032	1
FBgn0005586	Rab3	2R	6608833	42.6246	51.6816	48.3207	47.5423	60.3464	59.0647	51.3633	56.9248	46.981	60.2052	58.0517	55.0793	55.6792	50.9887	50.7636	52.4772	46.3754	43.9034	48.3976	46.2255	47.5008	49.1823	49.1439	48.609	48.3207	52.9183	53.4969	51.5786	40.9586	49.1056	48.8119	46.292	28.5319	34.2807	33.965	32.2592	46.0083	37.1235	50.2558	44.4625	40.8204	37.6884	49.0278	42.5122	0.916863	1
FBgn0005590	scw	2L	19699627	0	0	0	0	0	0	0.247953	0.082651	0	0	0	0	0	0	0.0733653	0.0244551	0	0	0	0	0	0	0	0	0	0.332384	0	0.110795	0	0.234623	0	0.0782077	0	0	0.388547	0.129516	0.241951	0.119268	0.250167	0.203795	0.127624	0	0.125837	0.084487	1	1
FBgn0005592	btl	3L	14068872	2.96716	2.73338	2.56797	2.75617	3.28707	3.10304	1.77319	2.7211	3.57865	3.25721	2.20228	3.01271	2.99473	2.00709	2.16144	2.38775	2.49863	2.8029	1.64551	2.31568	2.83194	2.92595	3.10871	2.95553	2.56797	1.66396	1.80157	2.01117	1.9696	2.22325	2.21213	2.13499	2.29151	2.46126	2.40835	2.38704	2.81048	2.5234	3.17564	2.83651	2.64687	1.803	2.74479	2.39822	0.58239	1
FBgn0005593	RpL7	2L	10201101	836.482	814.707	790.448	813.879	709.854	763.258	711.659	728.257	818.156	761.776	740.534	773.489	561.46	566.107	612.323	579.963	693.108	684.49	665.237	680.945	956.648	862.685	806.946	875.426	790.448	752.664	800.33	781.147	889.091	789.624	776.094	818.27	1184.45	879.4	842.61	968.82	933.963	928.477	762.328	874.923	1000.43	915.852	824.911	913.731	0.155313	1
FBgn0005596	yemalpha	3R	24944052	1.90975	1.30308	1.61351	1.60878	1.75967	2.16768	2.19794	2.04176	2.23508	1.36601	1.889	1.83003	1.75043	1.74922	1.78842	1.76269	1.39191	1.65437	1.3469	1.46439	2.06475	1.3816	2.20184	1.88273	1.61351	1.57841	1.59503	1.59565	1.19672	2.22833	1.22408	1.54971	0.966093	1.10684	1.47609	1.18301	1.72345	1.92567	2.37597	2.00836	1.53535	1.5963	1.23498	1.45554	0.783795	1
FBgn0005612	Sox14	2R	19866744	11.1049	10.8245	8.85749	10.2623	9.62673	11.0966	10.1122	10.2785	9.85457	9.57243	8.66746	9.36482	7.4266	8.60657	8.50858	8.18058	8.17159	8.30576	9.03693	8.50476	8.51015	7.06815	6.89433	7.49088	8.85749	8.8252	10.7782	9.48696	9.03866	10.1665	9.57385	9.593	9.89575	10.1182	9.46359	9.82585	8.89094	10.3868	9.67109	9.64961	8.34947	10.0734	8.55329	8.99205	0.56025	1
FBgn0005613	Sox15	2R	10088888	0.738499	0.647873	0.765747	0.717373	0.78515	0.279413	0.364261	0.476275	0.666749	0.264117	0.706912	0.545926	0.447941	0.450949	0.215558	0.371483	0.634368	0.397083	0.510217	0.513889	0.513282	0.701221	0.319294	0.511266	0.765747	0.732446	0.991283	0.829825	0.356994	0.646272	0.649168	0.550811	0.29887	0.280884	0.237835	0.27253	0.444306	0.744658	0.505332	0.564765	0.37498	0.550554	0.462161	0.462565	0.648825	1
FBgn0005614	trpl	2R	5641202	395.066	434.883	467.1	432.35	436.546	393.804	373.979	401.443	308.377	436.495	405.765	383.546	257.42	231.903	348.114	279.146	353.728	374.883	290.881	339.831	445.178	441.577	404.553	430.436	467.1	478.776	456.051	467.309	244.875	237.398	253.518	245.264	220.022	220.816	179.435	206.758	272.535	260.863	259.988	264.462	234.16	210.13	223.308	222.533	0.922538	1
FBgn0005616	msl-2	2L	3462213	4.09078	4.95759	4.24964	4.43267	5.65004	4.31354	4.3005	4.75469	3.09615	3.81497	3.55872	3.48995	3.94276	3.41824	3.50627	3.62242	3.70577	3.97823	3.86515	3.84972	5.90502	6.99746	4.95355	5.95201	4.24964	4.92812	5.80137	4.99304	3.90916	4.49878	4.76964	4.39253	2.8669	2.84876	3.5111	3.07559	5.13478	4.39722	5.50974	5.01391	5.12817	3.99339	4.81153	4.64436	0.0602595	1
FBgn0005617	msl-1	2L	18683720	5.10973	6.13419	5.94893	5.73095	6.97649	6.17293	6.56618	6.57187	6.04314	5.70676	5.2001	5.65	5.65494	5.4192	5.2005	5.42488	5.4183	5.32619	6.50305	5.74918	6.35521	7.0041	5.96877	6.44269	5.94893	7.15723	5.15009	6.08542	6.06683	5.64834	6.70792	6.14103	4.02697	4.41296	5.50843	4.64945	6.69849	6.2849	6.7252	6.56953	5.94007	5.97827	5.78957	5.90264	0.248482	1
FBgn0005619	Hdc	2R	6127337	5.98263	6.99288	7.21673	6.73075	6.81175	8.53397	5.78943	7.04505	6.01926	8.73913	9.3983	8.05223	6.72993	5.14692	7.52279	6.46655	8.59721	6.94404	6.30435	7.28187	7.64718	5.70859	8.9195	7.42509	7.21673	7.36225	8.04894	7.54264	9.11453	7.89557	9.97717	8.99576	7.84815	9.09116	6.4846	7.80797	9.32396	8.68273	10.812	9.60623	7.42878	6.76472	9.18327	7.79226	0.173684	1
FBgn0005624	Psc	2R	8853815	1.40218	1.53081	1.39576	1.44292	1.71736	1.30154	1.27258	1.43049	1.1703	1.65822	1.37442	1.40098	1.46967	1.27209	1.24421	1.32866	1.41909	1.64861	1.45312	1.50694	2.07907	1.82593	2.58663	2.16388	1.39576	1.40923	1.40533	1.40344	1.25322	1.5183	1.30653	1.35935	0.817147	0.90206	0.895929	0.871712	1.78169	1.14441	1.3956	1.44057	1.02524	1.18598	1.09512	1.10211	0.892185	1
FBgn0005626	ple	3L	6706455	25.4819	18.3558	20.3017	21.3798	21.0807	20.5897	23.0073	21.5592	31.3464	26.3051	26.187	27.9462	20.6431	22.903	22.0539	21.8667	25.6852	24.8344	26.4846	25.6681	24.8151	28.8806	28.0422	27.246	20.3017	20.215	19.479	19.9986	15.8594	13.7383	10.2507	13.2828	15.862	17.6002	16.6452	16.7025	15.2075	14.6192	17.1947	15.6738	12.446	12.0967	14.9615	13.1681	0.000187342	0.0214445
FBgn0005630	lola	2R	6369712	158.34	162.235	161.651	160.742	176.439	194.174	162.506	177.706	143.887	165.895	166.808	158.863	166.683	151.132	159.724	159.18	150.353	157.534	146.679	151.522	186.681	173.13	170.163	176.658	161.651	175.266	176.672	171.196	141.122	152.673	149.42	147.738	103.714	126.008	127.537	119.086	167.524	142.566	171.593	160.561	139.309	127.728	160.093	142.377	0.306122	1
FBgn0005631	robo	2R	18580029	6.12906	6.922	5.86915	6.30674	8.01784	7.78312	7.69336	7.83144	6.0212	7.76016	7.41248	7.06461	7.46705	7.25316	7.1179	7.27937	7.017	7.21092	6.61622	6.94805	5.48398	6.47903	7.42811	6.46371	5.86915	7.12688	6.78306	6.59303	7.08436	7.27859	7.74146	7.36814	5.04638	5.75818	5.17292	5.32583	7.78178	5.80326	7.83908	7.14137	5.82174	6.01402	6.58513	6.1403	0.532225	1
FBgn0005632	faf	3R	27602733	23.7922	21.9431	21.7576	22.4976	26.0863	27.2093	24.7238	26.0065	22.3147	26.3983	25.3531	24.6887	22.6332	20.3004	21.9198	21.6178	22.7614	22.2674	21.3732	22.134	23.5207	25.1355	24.502	24.3861	21.7576	25.4908	24.2099	23.8194	21.1251	24.0238	25.6155	23.5881	20.7105	21.0946	21.8647	21.2233	26.1203	22.6772	27.1504	25.316	21.1716	18.6568	21.4754	20.4346	0.718425	1
FBgn0005633	fln	3L	19982651	3.07576	3.46448	2.20491	2.91505	2.0347	3.06736	1.68565	2.26257	2.46838	3.63648	2.87878	2.99455	2.52311	1.93953	1.92541	2.12935	1.70801	2.84763	2.83333	2.46299	1.26681	3.70857	1.57608	2.18382	2.20491	1.58177	2.22059	2.00242	5.35054	3.98763	1.97594	3.77137	2.62783	2.22828	3.37352	2.74321	3.60893	2.60504	4.35456	3.52284	5.20185	2.96468	5.13293	4.43315	0.4303	1
FBgn0005634		2R	20878093	29.7459	32.593	31.0751	31.138	35.3547	36.0814	34.1043	35.1801	29.4619	33.3456	33.1921	31.9999	33.4357	29.1918	32.8877	31.8384	28.9595	32.4023	29.2872	30.2163	37.7594	32.0024	30.1362	33.2993	31.0751	33.6008	30.3454	31.6738	27.3769	30.8735	25.44	27.8968	19.1562	22.0877	24.625	21.9563	28.7346	28.6906	33.3744	30.2665	24.9732	24.9475	27.622	25.8476	0.411316	1
FBgn0005636	nvy	2R	20163258	2.65909	3.60955	4.02593	3.43152	3.09935	3.5772	4.95492	3.87716	3.55665	4.60236	2.63963	3.59955	4.23731	2.92106	3.30584	3.48807	3.23011	2.85958	3.06189	3.05053	3.1031	2.77871	3.2983	3.06004	4.02593	3.25592	3.3137	3.53185	2.70837	2.43618	2.55389	2.56615	2.78998	2.44013	2.63888	2.623	3.2707	2.75959	2.74462	2.92497	3.15046	2.24267	3.79658	3.06324	0.757176	1
FBgn0005638	slbo	2R	20219045	0.121117	0.0944475	0.111631	0.109065	0.309042	0.122199	0.358441	0.263227	0	0	0.185498	0.0618327	0	0.169045	0.176762	0.115269	0.113497	0.130246	0.0418387	0.0951939	0.448961	0	0	0.149654	0.111631	0.0800826	0.0867061	0.0928066	0.208171	0.169585	0.053233	0.143663	0.245079	0.15794	0	0.13434	0.233177	0.229885	0.361642	0.274901	0.122996	0.0656675	0.121274	0.103312	0.191242	1
FBgn0005640	Eip63E	3L	3515685	18.0366	19.3862	17.8769	18.4332	22.0809	20.3045	17.9604	20.1153	14.0936	18.7853	17.7259	16.8683	19.4158	18.8041	20.626	19.6153	16.9668	18.9128	20.2806	18.7201	17.5339	15.5684	16.1239	16.4087	17.8769	18.6579	16.1144	17.5497	17.9702	18.0805	17.585	17.8786	12.7963	14.1857	14.2532	13.7451	19.2503	15.4966	19.2906	18.0125	15.626	15.1751	18.8876	16.5629	0.20642	1
FBgn0005642	wdn	3R	24633705	6.80145	4.64084	6.0729	5.8384	4.97138	7.29116	5.76604	6.00953	4.26434	4.9663	4.31324	4.51463	4.60677	3.33736	4.83906	4.26106	3.98347	4.38086	3.41413	3.92615	6.49996	4.95892	4.53349	5.33079	6.0729	5.12955	5.24949	5.48398	5.0231	5.50565	4.85772	5.12882	4.0428	4.38848	4.87369	4.43499	5.57532	5.0932	4.86557	5.17803	5.50401	4.66717	4.46924	4.88014	0.0680526	1
FBgn0005648	Pabp2	2R	4018938	18.315	17.3816	17.6857	17.7941	16.7602	15.5317	16.4663	16.2527	17.1126	16.5895	18.3384	17.3468	21.079	21.1579	24.034	22.0903	16.3151	19.7849	19.9373	18.6791	21.4219	18.0674	20.1727	19.8873	17.6857	20.6361	14.486	17.6026	14.3271	12.4891	11.0967	12.6376	13.2961	15.2132	12.346	13.6184	16.1365	14.0921	15.6058	15.2781	16.1023	14.468	17.4431	16.0045	0.261921	1
FBgn0005649	Rox8	3R	19868924	40.3412	36.973	33.4461	36.9201	34.405	40.0167	31.8294	35.417	35.0733	39.2917	35.9322	36.7657	35.5771	31.4689	33.3508	33.4656	32.8105	31.3425	30.6285	31.5938	33.8183	34.2608	32.5256	33.5349	33.4461	33.5383	38.1791	35.0545	31.5957	27.9046	26.3479	28.6161	23.687	25.885	26.8633	25.4784	30.9834	26.4029	32.4295	29.9386	26.9884	27.2539	29.1565	27.7996	0.390307	1
FBgn0005654	lat	2R	9090233	0.139209	0.977021	0.769853	0.628694	0.828829	0.852067	1.10622	0.929039	0.558578	0.398298	0.319815	0.425564	0.79717	0.582901	0.568874	0.649648	0.611185	0.451913	0.480894	0.514664	0.258013	1.05747	0.321004	0.545496	0.769853	0.276139	0.199318	0.415103	0.426688	0.634532	0.61186	0.557693	0.281693	0.902236	0.358666	0.514198	0.402019	0.462402	0.48495	0.44979	0.0706846	0.0754769	0.766655	0.304272	0.38791	1
FBgn0005655	mus209	2R	16149259	1.94054	1.00919	0.623613	1.19111	1.15099	1.024	0.667464	0.947485	0.259291	0.32262	0.777215	0.453042	4.04322	3.42312	3.77229	3.74621	1.71568	1.94039	2.2322	1.96276	6.89756	5.96042	5.07086	5.97628	0.623613	4.47365	1.38803	2.16176	0.416493	0.753986	0.710086	0.626855	3.42297	3.97067	2.78931	3.39432	0.65133	0.963214	1.44711	1.02055	0.515339	0.917146	3.21823	1.55024	0.438068	1
FBgn0005658	Ets65A	3L	6090717	2.86323	3.94381	4.25357	3.68687	4.10165	4.96744	5.01993	4.69634	3.39427	5.81011	4.53744	4.58061	4.09935	4.35844	4.53999	4.33259	3.65197	4.02362	4.58221	4.08593	5.56545	3.73536	4.04459	4.44847	4.25357	4.511	4.24103	4.3352	3.75121	4.4406	4.40529	4.19903	3.61809	3.72389	3.44126	3.59441	4.51423	2.60742	3.638	3.58655	3.58041	3.6421	4.03242	3.75164	0.698201	1
FBgn0005659	Ets98B	3R	23562262	12.5958	8.66218	11.1523	10.8034	10.8819	9.70643	11.7408	10.7764	11.3024	10.1209	10.3292	10.5842	9.20818	8.65169	9.29269	9.05085	9.23202	10.5589	8.53093	9.44062	10.8455	9.04062	11.4349	10.4403	11.1523	9.83666	9.65622	10.2151	11.2082	10.6004	9.06698	10.2919	9.15144	8.49291	9.40343	9.01593	12.0771	9.93006	10.0688	10.692	11.2805	9.5717	9.43428	10.0955	0.72686	1
FBgn0005660	Ets21C	2L	547016	0.974488	0.375298	1.47761	0.942465	1.53557	0.23262	0.227443	0.665211	0.111721	0	0.426461	0.179394	0.405614	0.253166	0.675577	0.444786	0.391361	0.17061	0.253005	0.271659	2.67278	1.50118	0.642015	1.60532	1.47761	0.368189	1.09651	0.98077	0.558711	0.845108	0.433481	0.612433	0.378136	0.309272	0.143494	0.276967	0.474695	0.660598	1.06482	0.733371	0.60531	0.397101	0.418202	0.473538	0.153267	1
FBgn0005664	Cry	2L	11944141	2.51992	2.66686	2.48847	2.55842	0.459275	0.908019	1.24294	0.870078	0.577802	0.514986	0.41351	0.502099	0.989869	1.00489	0.682994	0.892584	0.955799	0.709727	0.497421	0.720982	2.33524	1.75792	2.90534	2.33283	2.48847	2.49927	1.80399	2.26391	0.773423	1.51215	2.21511	1.50023	1.6754	1.95599	1.29848	1.64329	5.71775	7.089	8.41999	7.07558	5.20945	6.24577	7.83991	6.43171	0.452366	1
FBgn0005666	bt	4	745030	40.3842	36.9602	37.5137	38.286	31.1895	32.559	36.3509	33.3665	16.665	26.2072	25.1519	22.6747	43.8256	26.9886	40.2784	37.0309	31.8898	30.3009	27.8774	30.0227	39.0815	39.7286	40.006	39.6054	37.5137	46.2538	45.3609	43.0428	14.4629	21.1674	30.6494	22.0932	7.64695	13.7696	13.1623	11.5263	27.0755	20.6046	37.3019	28.3273	16.5183	16.3123	20.0713	17.634	0.000146118	0.0176263
FBgn0005670	Cyp4d1	X	2053175	8.8877	9.73597	10.3078	9.64382	5.57949	5.5511	3.75756	4.96272	1.69824	2.62361	2.26868	2.19684	4.78059	5.08945	5.74431	5.20478	3.37108	4.4754	2.55849	3.46832	6.66752	9.18538	6.83137	7.56142	10.3078	12.033	10.9073	11.0827	6.00125	6.60679	4.8211	5.80971	6.7655	3.39056	3.48929	4.54845	10.6787	12.0495	8.00347	10.2439	10.5213	13.4144	12.7052	12.2136	0.00268782	0.169279
FBgn0005671	Vha55	3R	8449484	116.053	124.671	111.988	117.571	123.8	126.034	119.403	123.079	124.177	121.828	116.09	120.698	115.606	105.491	115.401	112.166	101.672	102.61	107.6	103.961	122.652	117.1	138.711	126.154	111.988	117.953	124.035	117.992	108.486	110.202	118.463	112.384	98.1259	90.1458	85.1417	91.1378	110.417	97.0234	108.868	105.436	106.264	100.1	110.806	105.723	0.767823	1
FBgn0005672	spi	2L	19567900	27.4974	28.7391	27.8965	28.0443	39.0923	31.3696	26.7842	32.4154	28.9816	30.3488	25.429	28.2531	26.3155	27.3435	25.6908	26.4499	22.3952	21.3094	22.4552	22.0533	26.7275	19.7156	28.5104	24.9845	27.8965	25.665	27.118	26.8932	27.6321	32.564	29.6244	29.9402	19.0695	18.9475	18.2307	18.7492	30.645	24.3228	26.4723	27.1467	24.7722	23.7936	27.0524	25.2061	0.240805	1
FBgn0005674	Aats-glupro	3R	19777852	16.5923	15.1966	15.2251	15.6713	14.3114	13.8515	14.3064	14.1564	14.6662	13.5772	13.0759	13.7731	17.705	18.428	19.7357	18.6229	14.6753	13.8344	15.2095	14.5731	24.3208	20.4893	20.2526	21.6876	15.2251	20.1243	18.1298	17.8264	15.7809	16.5914	13.6896	15.354	14.748	16.5512	19.5871	16.9621	16.3028	16.3255	17.0415	16.5566	16.7122	18.1544	17.0914	17.3193	0.708047	1
FBgn0005677	dac	2L	16466512	3.66387	3.63946	3.645	3.64944	4.7946	4.94997	3.95194	4.5655	3.79581	3.60003	3.91106	3.76897	4.19081	4.01553	4.08898	4.09844	3.14115	3.81884	4.347	3.769	4.47053	3.73537	5.62328	4.60973	3.645	4.65583	3.8586	4.05314	3.17598	3.02707	2.86627	3.02311	2.16861	2.98086	2.71002	2.61983	4.31392	3.16853	5.43072	4.30439	3.04852	3.6781	3.55042	3.42568	0.155289	1
FBgn0005683	pie	2L	10420711	0.168371	0.919224	0.310399	0.465998	1.0026	0.339784	0	0.447461	0.405418	0.321183	0.515813	0.414138	0.626818	0.352553	0.44238	0.473917	0.789027	0.543277	0.872586	0.734963	0.936305	0	0.388282	0.441529	0.310399	0.334024	0.36165	0.335358	1.04079	0.62877	0.666129	0.778563	0.588124	0.365991	0.416014	0.45671	0.729463	0.639257	0.754233	0.707651	0.427523	0.821728	0.337226	0.528826	1	1
FBgn0005694	Aef1	3L	21426522	22.6262	23.2912	19.3206	21.746	23.7243	21.0426	19.4615	21.4095	21.6285	22.8006	20.8884	21.7725	23.5964	21.1642	21.6182	22.1263	20.257	19.2934	18.5752	19.3752	25.6494	24.1688	23.2998	24.3727	19.3206	22.0281	25.0329	22.1272	18.8316	19.1887	19.5437	19.188	16.0118	18.2153	18.0378	17.4216	20.7175	17.9431	20.614	19.7582	18.5421	19.1117	21.625	19.7596	0.529497	1
FBgn0005695	gcl	2R	4611765	5.87933	6.50394	5.92298	6.10208	5.93092	6.75961	7.55336	6.74796	5.3767	5.99836	5.02581	5.46696	5.75006	6.91777	5.30794	5.99192	4.52714	4.50907	5.80951	4.94857	4.30808	5.78656	4.41394	4.83619	5.92298	5.69554	6.65602	6.09151	7.46141	7.78544	7.15128	7.46604	5.14606	5.11124	5.63633	5.29788	6.71246	6.68258	7.00844	6.80116	7.35907	7.33908	6.91375	7.20397	0.210954	1
FBgn0005696	DNApol-alpha73	3R	23064903	0.653068	0.38195	0.451443	0.495487	0.555458	0.164727	0.322123	0.347436	0.524105	0.311418	0.375081	0.403535	0.897877	0.854532	0.810143	0.854184	0.458986	0.468197	0.338395	0.421859	0.302603	1.2402	0.752953	0.765252	0.451443	0.215905	0.818168	0.495172	0.561237	0.228604	0.358794	0.382878	0.264296	0.425812	0.673031	0.45438	0.707233	0.309889	0.406249	0.474457	0.331601	0.265562	0.490436	0.362533	0.810695	1
FBgn0005771	noc	2L	14490862	20.9047	22.9328	24.6015	22.813	25.1133	20.7341	25.7487	23.8654	22.7479	20.8381	23.7866	22.4575	25.14	24.7676	22.8904	24.266	24.7912	24.3856	20.8889	23.3552	19.9199	19.0965	18.6552	19.2239	24.6015	20.3038	21.2222	22.0425	23.2431	20.3405	20.2447	21.2761	17.0158	19.8165	20.7525	19.1949	23.3633	20.9599	21.7469	22.0234	20.8693	20.171	21.464	20.8348	0.818888	1
FBgn0005775	Con	3L	4936758	17.5796	17.8997	17.0266	17.502	21.6278	22.6192	18.7679	21.005	17.6547	23.5218	18.5506	19.909	20.7945	18.363	18.6463	19.2679	17.8097	18.4301	17.6657	17.9685	15.837	16.7311	19.5055	17.3579	17.0266	19.4421	18.3909	18.2865	17.0393	18.4241	15.7839	17.0824	11.4229	12.435	13.9457	12.6012	18.9947	14.8122	20.2096	18.0055	15.5091	14.462	19.693	16.5547	0.533636	1
FBgn0005777	PpD3	3R	5573597	12.1801	9.17994	11.5127	10.9576	11.9045	12.0054	12.7228	12.2109	10.7766	12.4351	10.5038	11.2385	11.8102	11.6238	12.1578	11.8639	11.4545	11.5322	11.4109	11.4659	10.4999	11.9961	15.031	12.509	11.5127	12.9562	13.3926	12.6205	12.6898	12.4771	12.3869	12.5179	9.23441	10.1645	10.7499	10.0496	12.9612	11.7612	13.7215	12.8146	9.98401	13.6616	14.8204	12.822	0.969412	1
FBgn0005778	PpD5	2R	17929172	0.832178	0	0.255669	0.362616	0.235932	0	0	0.078644	0	0.264551	0.424845	0.229799	0	0	0	0	0.259941	0	0.095823	0.118588	0.514126	0.903053	0	0.472393	0.255669	0.366826	0.198583	0.273693	0.119194	0.129467	0	0.082887	0.112261	0	0.142936	0.0850657	0.267022	0.263253	0.138045	0.222773	0.281697	0	0	0.093899	0.631548	1
FBgn0005779	PpD6	2L	3109672	0.25419	0	0.234283	0.162824	0.216197	0	0	0.0720657	0.407988	0	0	0.135996	0.411147	0	0.148389	0.186512	0.714593	0.364466	0.526846	0.535302	0.942242	0	0.293067	0.41177	0.234283	0.336142	0	0.190142	0.218447	0	0.223442	0.147296	0.10287	0	0.13098	0.07795	0.122343	0.120616	0.252995	0.165318	0.258134	0.275635	0.12726	0.220343	1	1
FBgn0008635	betaCop	X	18275580	19.0124	19.1572	20.1815	19.4504	21.349	22.0921	17.8072	20.4161	22.1155	20.9845	20.9393	21.3464	22.2867	18.9703	25.565	22.274	22.654	21.8238	19.9613	21.4797	30.8828	24.6884	24.1369	26.5694	20.1815	23.659	23.4748	22.4384	21.0203	18.5947	16.7595	18.7915	30.9933	24.0036	26.9136	27.3035	19.6896	18.9048	19.1357	19.2434	20.9344	24.9598	20.8017	22.232	0.224755	1
FBgn0008636	hbn	2R	16842169	1.68468	2.48147	1.8978	2.02132	2.06971	2.8329	2.03123	2.31128	1.50222	0.892604	2.43685	1.61056	1.51385	1.82882	1.52984	1.62417	1.92951	1.47617	1.42256	1.60941	3.12242	2.03128	2.58979	2.58116	1.8978	2.22782	1.07204	1.73255	1.84995	1.31048	2.0568	1.73908	1.66659	1.46459	1.15745	1.42954	2.34244	1.06587	2.14253	1.85028	1.90091	1.52234	2.62401	2.01575	0.578933	1
FBgn0008646	E5	3R	9693067	1.74854	0.991654	0.439529	1.05991	0.675999	0.641518	0.627244	0.648254	0.76541	0.606399	0.608638	0.660149	0.41138	0.776516	0.742366	0.643421	0.546178	0.512821	0.713841	0.590947	1.17847	0.344993	0.733082	0.752182	0.439529	0.630622	0.568983	0.546378	1.02455	1.03866	0.698651	0.92062	0.257321	0.760054	0.409543	0.475639	0.688569	0.603422	0.55374	0.615244	0.726413	0.775662	0.636658	0.712911	1	1
FBgn0008651	lbl	3R	17235699	2.99	1.45726	1.03899	1.82875	2.78388	2.45109	2.40236	2.54578	3.97923	1.96046	2.00344	2.64771	2.17651	2.14351	1.39084	1.90362	1.40854	1.33974	1.46775	1.40534	1.70899	1.20085	1.07729	1.32904	1.03899	1.23559	1.18867	1.15442	1.99947	2.61659	2.77202	2.46269	1.21003	0.869458	1.90147	1.32699	2.14171	2.12818	1.48797	1.91929	1.87546	1.73049	1.96473	1.85689	0.606204	1
FBgn0008654		2R	8884006	6.46486	7.66343	6.91193	7.01341	7.7816	10.5834	7.29772	8.55424	6.70992	7.69305	8.35676	7.58658	6.88743	6.88582	7.35	7.04108	6.59148	6.48877	7.93802	7.00609	7.55938	7.52319	8.88484	7.98914	6.91193	8.00676	6.53422	7.15097	6.90617	7.13562	6.84647	6.96275	5.10015	5.31567	5.74074	5.38552	7.418	6.38642	7.53771	7.11404	6.6944	5.72048	6.29215	6.23568	0.457522	1
FBgn0010014	CanB	X	5226532	49.5811	48.6708	52.1334	50.1284	60.8854	53.9581	59.3518	58.0651	57.6719	59.3388	50.9872	55.9993	48.7475	51.4138	51.3112	50.4908	47.1724	48.7825	47.8209	47.9253	52.3073	49.8036	52.1244	51.4118	52.1334	56.8302	50.8477	53.2704	53.9799	54.3784	66.7209	58.3597	36.3686	49.3986	41.1727	42.3133	52.2843	49.3995	50.7332	50.8057	56.3345	43.4671	63.3016	54.3677	0.985108	1
FBgn0010015	CanA1	3R	26865098	2.31218	2.70747	2.07993	2.36653	2.14484	1.60279	2.74959	2.16574	1.34012	1.83759	1.93111	1.70294	1.50538	1.34311	2.28712	1.71187	1.94885	1.33528	2.35291	1.87901	2.21426	2.1603	2.52934	2.3013	2.07993	1.66766	2.28075	2.00945	1.25142	1.91806	2.32738	1.83229	1.23561	1.39587	1.56891	1.40013	1.60743	2.01568	2.3212	1.98144	1.28044	0.69644	0.930416	0.969099	0.308557	1
FBgn0010019	Cyp4g1	X	361090	1.33324	1.96382	0.682682	1.32658	0.755979	1.94301	0.584546	1.09451	0	0.42384	0.90753	0.44379	0.431298	0.258449	0.691831	0.460526	0.323908	0.637216	0.153519	0.371548	2.74562	0.482263	0.853975	1.36062	0.682682	0.783592	1.9089	1.12506	1.01846	1.0371	1.17197	1.07584	0	0	0.610664	0.203555	0.641697	0.843518	1.47442	0.986545	2.63264	1.92763	2.89243	2.48423	0.0611648	1
FBgn0010038	GstD2	3R	8197693	2.7573	3.22524	2.1178	2.70011	0.390864	0.927317	1.81337	1.04385	0.368801	0.438276	0.351915	0.386331	1.04064	1.28281	1.20723	1.17689	0.71773	0.988379	2.06372	1.25661	4.2587	2.49344	1.05967	2.60394	2.1178	1.51928	3.28987	2.30898	1.97465	1.50139	2.62575	2.03393	1.67382	0.399513	1.18399	1.08577	1.99066	2.39868	3.20173	2.53036	2.10007	1.2458	3.68117	2.34235	0.357826	1
FBgn0010039	GstD3	3R	8198790	13.5647	7.40451	7.9182	9.62914	10.7681	9.58021	12.4894	10.9459	9.07172	9.05574	7.27134	8.46627	8.77629	8.36189	9.76644	8.96821	5.22577	8.104	7.65351	6.99443	10.8945	9.32267	6.77708	8.99808	7.9182	10.7628	5.82651	8.16917	7.77155	10.5517	9.14166	9.15497	5.48964	5.8963	5.12577	5.5039	5.65829	4.7202	10.5758	6.98476	9.41307	7.35458	6.56479	7.77748	0.268724	1
FBgn0010040	GstD4	3R	8199824	0	0	0	0	0.39681	0.470713	0	0.289174	0	0	0.357269	0.11909	0.452774	0	0	0.150925	0	0.167236	0.161163	0.109466	0	0	0	0	0	0	0	0	0	0	0	0	0.188809	0.202796	0	0.130535	0.22455	0.44276	0	0.222437	0.236891	0.505903	0.70072	0.481171	1	1
FBgn0010041	GstD5	3R	8201486	0.518141	0	0	0.172714	0	0	1.02228	0.34076	0	0	0	0	0.335233	0	0	0.111744	0.485543	0.185732	0	0.223758	0	0.562269	0	0.187423	0	0.685192	0.741863	0.475685	0	0	0.227732	0.0759107	0.419382	0	0	0.139794	0.748154	0.245864	0.773559	0.589192	0.263091	0	0	0.087697	0.511717	1
FBgn0010042	GstD6	3R	8202894	0.458301	0	0	0.152767	0	0	0	0	0.735598	0	0	0.245199	0.296518	0.159915	0	0.152144	0	0	0.158316	0.052772	0	0	0	0	0	0	0	0	0	0	0	0	0.185474	0	0	0.0618247	0	0	0	0	0	0	0	0	0.515016	1
FBgn0010043	GstD7	3R	8204261	0	0	0	0	0	0	0	0	0	0	0	0	0	0	0	0	0	0	0	0	0	0	0	0	0	0	0	0	0	0	0	0	0	0	0	0	0	0	0	0	0	0	0	0	1	1
FBgn0010044	GstD8	3R	8205745	0	0.663396	0	0.221132	0.361783	0.858324	0.839225	0.686444	0.341362	0.811336	0.651465	0.601388	0.550409	0.445262	0.496627	0.497433	0.531464	0.304948	0	0.278804	0	0.923171	0	0.307724	0	1.12499	0.30451	0.4765	0	0	1.12172	0.373907	0.68857	0.184894	0.438361	0.437275	0.409456	0.403676	0.63504	0.482724	0.43196	0.922491	0.212955	0.522469	1	1
FBgn0010051	Itp-r83A	3R	1342862	12.4718	13.934	12.5543	12.9867	12.6159	14.7284	12.6681	13.3375	10.4142	13.0626	11.3329	11.6032	13.0801	12.0515	12.7988	12.6435	11.5675	12.448	13.4412	12.4856	13.5936	14.0332	12.7526	13.4598	12.5543	15.9979	13.3322	13.9615	12.4922	13.7052	13.2375	13.145	11.5921	12.719	13.0071	12.4394	15.9256	13.6155	14.8334	14.7915	13.1319	13.3022	13.5797	13.3379	0.196666	1
FBgn0010052	Jhe	2R	12007311	0.687632	0.804392	0.926657	0.806227	2.48582	1.35251	1.01759	1.61864	1.88267	0.983724	0.789885	1.21876	2.38515	2.51416	3.66324	2.85418	2.22233	3.4838	1.95981	2.55531	2.48457	3.09127	2.12515	2.567	0.926657	2.88068	1.59996	1.80243	2.06845	1.01671	0.755603	1.28025	1.89879	3.37265	1.86033	2.37726	1.07568	0.97892	0.85554	0.970047	0.698324	1.11853	0.838918	0.885257	0.788267	1
FBgn0010053	Jheh1	2R	14740939	47.8675	41.8625	46.7989	45.5096	51.5572	55.743	44.3523	50.5508	56.366	49.4915	50.1881	52.0152	30.2464	33.561	30.0984	31.3019	43.4587	35.6	41.3386	40.1324	38.5554	39.0796	34.5574	37.3975	46.7989	32.8333	32.9868	37.5397	49.2102	47.7098	53.1866	50.0355	42.2743	46.1838	40.2253	42.8945	37.6805	44.8968	43.3013	41.9595	41.2279	40.5061	37.291	39.675	0.413651	1
FBgn0010078	RpL23	2R	18741898	1299.01	1279.4	1178.99	1252.47	1095.89	1126.08	1061.26	1094.41	1262.44	1159.05	1084.98	1168.82	929.112	919.08	1005.38	951.191	1030.39	1072.65	1075.46	1059.5	1356.08	1345.73	1286.09	1329.3	1178.99	1185.26	1187.41	1183.89	1230.12	1117.65	986.815	1111.53	1308.88	1181.86	1056.92	1182.55	1291.63	1305.47	1081.23	1226.11	1390.01	1300.02	1142.07	1277.37	0.147252	1
FBgn0010097	gammaTub37C	2L	19183863	0	0	0	0	0	0	0	0	0	0	0	0	0	0	0	0	0	0	0	0	0	0.240631	0.255661	0.165431	0	0	0	0	0	0	0	0	0	0	0	0	0	0	0	0	0	0	0	0	1	1
FBgn0010100	Acon	2L	21168616	183.837	185.408	171.778	180.341	172.799	181.416	175.428	176.548	164.761	160.26	161.605	162.209	161.457	132.428	146.054	146.646	149.997	153.368	139.192	147.519	190.797	182.165	184.486	185.816	171.778	177.425	176.689	175.297	152.604	151.769	169.5	157.958	137.935	123.415	128.075	129.808	150.704	151.786	154.595	152.362	149.469	154.249	160.468	154.729	0.475222	1
FBgn0010105	comm	3L	15715428	5.15374	8.35672	5.96419	6.49155	11.392	6.33612	7.14862	8.29225	7.81374	6.89937	7.4292	7.38077	9.88086	6.93055	8.19178	8.3344	7.31659	6.70152	5.31769	6.44527	7.26191	8.11637	9.90227	8.42685	5.96419	8.09233	7.26214	7.10622	6.68534	7.19463	7.3237	7.06789	5.81876	6.10153	4.46427	5.46152	5.88711	5.28788	6.05442	5.74314	6.9726	6.44173	6.93427	6.78287	0.62758	1
FBgn0010109	dpn	2R	4116476	0	0	0	0	0.141119	0	0.163676	0.101598	0	0.158236	0.254113	0.13745	0	0.115787	0	0.0385957	0.0518263	0	0.0573147	0.0363803	0	0	0	0	0	0	0.237557	0.0791857	0	0	0	0	0	0	0.0854944	0.0284981	0	0	0.0825687	0.0275229	0.0842459	0	0.0830662	0.0557707	1	1
FBgn0010113	hdc	3R	26103656	15.023	13.9585	13.594	14.1918	16.3507	16.9082	14.797	16.0186	11.58	15.0679	14.2668	13.6382	13.7736	12.7783	13.1684	13.2401	11.325	12.9534	12.966	12.4148	15.8009	12.6023	12.5077	13.637	13.594	14.3413	13.7103	13.8819	9.26106	10.2073	12.1823	10.5502	6.66104	8.19747	8.09406	7.65086	13.3841	9.96804	13.2481	12.2001	9.0192	10.819	11.7962	10.5448	0.129782	1
FBgn0010114	hig	2R	5115286	44.4642	54.1746	50.2013	49.6134	58.2895	63.4281	50.9931	57.5702	49.308	61.9752	55.5915	55.6249	57.5534	52.0266	51.3917	53.6572	50.0416	48.5998	50.1	49.5805	75.625	60.3416	59.8066	65.2577	50.2013	62.6545	54.4715	55.7758	51.9727	52.1776	53.4302	52.5268	39.8396	43.9449	37.4458	40.4101	64.0556	49.997	65.834	59.9622	55.5115	43.552	59.369	52.8108	0.95282	1
FBgn0010173	RpA-70	3R	4087842	10.279	12.825	9.47402	10.8593	12.6432	9.7327	12.4802	11.6187	9.51829	10.8589	10.899	10.4254	10.4361	10.4841	10.9396	10.6199	10.6203	9.69335	10.707	10.3402	12.017	9.78159	11.6688	11.1558	9.47402	11.0835	9.96246	10.1733	10.9401	10.3331	14.2485	11.8406	10.1758	10.9296	11.8155	10.9736	12.787	11.3308	11.9621	12.0266	12.205	10.4603	13.1425	11.9359	0.379038	1
FBgn0010194	Wnt5	X	18395589	3.1557	4.1014	4.12047	3.79252	5.44263	5.39497	3.63192	4.82317	4.00985	4.09642	3.89338	3.99988	4.31029	3.79275	4.01706	4.04003	3.69646	3.42499	4.2696	3.79702	5.68639	4.37571	4.44688	4.83633	4.12047	3.1878	2.88667	3.39831	3.65362	3.35484	3.62159	3.54335	2.66065	2.59102	2.66497	2.63888	4.21906	3.20282	3.88247	3.76812	3.38271	2.70904	3.73032	3.27402	0.274053	1
FBgn0010197	Gyc32E	2L	11138801	0.291847	0.58845	0.717352	0.53255	0.579226	0.588941	0.479859	0.549342	0.70269	0.742274	0.794571	0.746512	0.346199	0.724093	0.369167	0.47982	0.364674	0.244115	0.39101	0.333266	0.360594	0.316732	0.336484	0.337937	0.717352	0.900594	0.34823	0.655392	0.453335	0.635709	0.663341	0.584128	0.157484	0.410017	0.486047	0.351183	0.468257	0.461647	0.387324	0.439076	0.29639	0.421985	0.519469	0.412615	0.192089	1
FBgn0010198	RpS15Aa	X	13229806	850.66	791.583	791.021	811.088	647.407	668.517	677.806	664.577	809.27	670.916	693.257	724.481	603.738	610.013	645.795	619.849	723.364	666.671	652.377	680.804	681.901	745.932	778.777	735.537	791.021	731.975	717.187	746.728	933.649	899.454	802.483	878.529	1075.86	1023.47	874.473	991.268	1044.58	1003.63	853.331	967.18	1139.67	1006.68	991.73	1046.03	0.0914022	1
FBgn0010213	Sod2	2R	12660376	51.1829	43.2389	53.7266	49.3828	54.1138	46.9785	40.323	47.1384	45.3544	47.7966	45.4553	46.2021	38.8641	40.3074	41.7064	40.2926	38.1926	42.1726	37.4487	39.2713	42.1616	37.4137	41.7996	40.4583	53.7266	35.7224	49.1095	46.1862	52.8441	46.284	46.8663	48.6648	52.935	42.4877	47.4361	47.6196	45.8479	45.032	41.5676	44.1492	44.9386	48.5635	50.3596	47.9539	1	1
FBgn0010215	alpha-Cat	3L	23311746	32.3817	32.8795	35.131	33.4641	39.4001	36.4148	31.6115	35.8088	34.1082	36.3515	34.3547	34.9381	35.0998	34.9954	36.5929	35.5627	33.1893	30.6713	32.0044	31.955	27.7162	34.6515	29.686	30.6846	35.131	32.5624	29.5406	32.4113	34.6888	34.635	34.6914	34.6717	20.3398	24.9256	26.0715	23.779	35.1757	27.7433	35.6987	32.8726	29.4017	27.5545	35.9138	30.9567	0.546542	1
FBgn0010217	ATPsyn-beta	4	1052440	514.737	500.462	487.005	500.735	444.901	481.489	489.081	471.824	448.074	403.888	412.988	421.65	472.451	470.154	463.093	468.566	388.246	412.195	384.774	395.072	536.198	596.099	566.822	566.373	487.005	532.95	531.745	517.233	600.945	580.506	581.148	587.533	489.502	454.424	468.217	470.714	575.594	559.034	564.143	566.257	607.909	653.443	645.914	635.755	0.282823	1
FBgn0010220	Dbp45A	2R	4975358	5.73099	6.54399	6.41406	6.22968	9.74882	6.40175	8.07652	8.0757	5.74909	8.19853	6.11282	6.68681	5.49565	6.5705	5.13789	5.73468	4.66716	6.45645	7.21185	6.11182	5.31098	8.21807	7.55146	7.02684	6.41406	5.68402	4.83539	5.64449	10.0261	6.68703	7.82651	8.17988	6.54382	5.96094	5.8007	6.10182	7.88103	6.50719	6.31521	6.90114	7.58668	5.43769	6.76314	6.59584	0.361812	1
FBgn0010222	Nmdmc	3R	4868226	64.857	63.1593	49.3321	59.1161	26.9504	34.198	33.2488	31.4657	32.9489	17.9635	26.8301	25.9142	95.5593	70.7013	52.4582	72.9063	38.0393	24.5378	24.6748	29.084	121.446	119.777	133.408	124.877	49.3321	74.6102	74.7067	66.2163	42.0714	45.6532	31.1773	39.634	58.6585	51.5216	75.469	61.883	59.7515	83.3392	53.7292	65.6066	115.98	140.08	105.644	120.568	0.20605	1
FBgn0010223	Galphaf	3L	16655657	0.369654	0.432389	0.851763	0.551269	0.786011	1.11888	0.911651	0.938847	0.296658	0.352542	1.1323	0.593833	0.538119	0.515935	0.701332	0.585129	0.519597	0.331265	0.702317	0.517726	0.685126	0	0.852384	0.512503	0.851763	0.244416	0.264632	0.453604	0.555932	0.517584	0.48741	0.520309	0.523596	0.401702	0.857146	0.594148	0.711668	0.263108	0.275938	0.416905	0.469238	0.300631	0.185067	0.318312	0.474812	1
FBgn0010225	Gel	3R	60868	271.618	272.83	247.547	263.998	268.709	267.575	271.744	269.343	321.287	284.409	298.854	301.517	225.627	254.296	240.719	240.214	278.389	287.341	266.118	277.283	215.15	230.047	211.86	219.019	247.547	240.513	254.169	247.41	366.785	315.196	244.005	308.662	394.953	384.799	403.783	394.512	306.001	331.912	273.005	303.639	338.745	294.386	240.348	291.16	0.0142088	0.537425
FBgn0010226	GstS1	2R	12980758	62.5992	69.2844	56.9967	62.9601	56.6366	55.0887	52.2573	54.6609	43.0376	45.9747	43.5959	44.2027	47.895	55.9547	43.0523	48.9673	43.3425	42.5619	36.5358	40.8134	65.0047	74.6421	77.0018	72.2162	56.9967	66.2466	58.7268	60.6567	87.4385	69.1746	50.144	68.919	63.2782	56.412	52.4069	57.3657	89.1269	82.2772	57.5003	76.3015	90.2243	63.9789	48.9171	67.7068	0.0367941	0.878241
FBgn0010228	HmgZ	2R	17585056	110.291	108.752	93.9271	104.323	116.361	113.756	117.511	115.876	112.925	116.546	124.362	117.944	115.773	113.915	103.585	111.091	97.6384	92.2634	104.402	98.1013	117.98	107.894	120.065	115.313	93.9271	94.2728	89.732	92.644	116.717	103.202	95.9665	105.295	69.9621	83.908	87.4569	80.4423	95.3451	89.0053	90.8989	91.7498	101.281	75.6297	96.8604	91.257	0.411648	1
FBgn0010235	Klc	3L	12739716	33.127	28.9617	27.8098	29.9662	31.4374	35.997	29.2102	32.2149	32.7591	31.2493	31.9377	31.982	29.0784	27.3942	29.4886	28.6537	24.7474	26.8923	23.1031	24.9143	27.4919	31.9761	36.2945	31.9208	27.8098	29.4142	30.0191	29.081	36.798	31.1803	28.067	32.0151	27.6222	28.0616	30.2498	28.6445	28.3602	28.7438	35.9865	31.0302	27.9643	25.7073	32.3211	28.6642	0.443772	1
FBgn0010238	Lac	2R	8340696	30.1564	33.808	30.3947	31.453	37.6911	28.7358	28.3086	31.5785	33.6941	31.0022	36.2361	33.6441	30.7467	28.9427	28.1384	29.2759	27.648	27.8074	28.1353	27.8636	27.8964	25.2556	31.9355	28.3625	30.3947	28.178	24.992	27.8549	26.4452	24.9151	28.6727	26.6777	19.8184	21.0266	21.7684	20.8711	22.6274	24.0987	29.8308	25.519	24.2347	27.7704	30.3188	27.4413	0.281589	1
FBgn0010240	Lcch3	X	15819089	12.4417	15.9008	13.8564	14.0663	13.9626	15.3425	8.69385	12.6663	12.4811	15.821	15.6148	14.639	12.8013	11.2753	11.6009	11.8925	11.2272	11.3974	12.4758	11.7001	14.4124	14.439	14.1454	14.3323	13.8564	13.2538	15.4634	14.1912	12.103	10.646	12.076	11.6083	8.11221	10.7412	8.81517	9.22286	13.8895	9.42962	11.7813	11.7001	11.7574	10.9618	11.8245	11.5146	0.187222	1
FBgn0010241	Mdr50	2R	10134471	1.10957	0.865251	1.75316	1.24266	1.61782	2.31895	0.860028	1.59893	0.572439	0.377931	1.39592	0.782097	1.02555	1.35507	0.508937	0.963186	1.06452	1.33526	1.28677	1.22885	1.02825	1.20407	1.1879	1.14007	1.75316	1.25769	1.1915	1.40078	5.99373	1.47962	0.452843	2.64206	1.89239	2.82494	2.81788	2.51174	5.14971	2.40688	0.59162	2.71607	3.86328	0.859417	0.436468	1.71972	0.0569887	1
FBgn0010246	Myo61F	3L	1318480	6.50969	7.49924	6.40597	6.80497	5.96099	6.53473	5.82732	6.10768	7.23152	5.06078	6.54013	6.27748	4.34012	5.19477	5.17267	4.90252	6.56758	6.85946	5.30245	6.24316	9.88921	6.44799	6.69522	7.67747	6.40597	8.73848	6.66585	7.2701	7.39864	7.83362	5.50197	6.91141	7.98226	7.31934	7.44057	7.58072	6.60857	8.18936	6.72645	7.17479	9.24026	6.43296	6.62321	7.43214	0.384288	1
FBgn0010247	Parp	3RHet	1935205	10.1859	10.409	13.0059	11.2003	15.3201	12.2144	12.3998	13.3114	11.1311	9.92082	9.79126	10.2811	12.0752	13.3848	12.3347	12.5982	11.482	10.7234	11.8044	11.3366	7.45951	9.60478	10.6189	9.22773	13.0059	11.5814	9.24261	11.2766	11.8614	13.0984	13.3086	12.7561	6.22046	11.0539	10.6085	9.29429	11.8385	10.3474	14.6311	12.2723	11.1706	11.9725	12.5364	11.8932	0.0945854	1
FBgn0010258	Rbp4	3R	9480278	0	0.173621	0.20521	0.126277	0.189369	0.224637	0.219639	0.211215	0.53604	0.21234	0.511497	0.419959	0.288102	0.388441	0.129975	0.268839	0.0695464	0.319239	0.384557	0.257781	0	0.483218	0	0.161073	0.20521	0.147214	0.478171	0.276865	0	0.207831	0.587144	0.264992	0.270315	0.290339	0.344179	0.301611	0.535806	0.105649	0.1108	0.250752	0.339152	0.120715	0.334403	0.264757	0.354293	1
FBgn0010263	Rbp9	2L	2954762	156.663	169.99	165.34	163.998	170.078	148.432	146.87	155.127	122.167	153.628	150.213	142.003	122.61	107.243	129.411	119.755	122.571	124.59	121.513	122.891	167.499	151.418	165.593	161.503	165.34	168.712	160.137	164.73	144.603	144.524	160.129	149.752	102.159	115.246	112.5	109.968	168.393	152.488	192.035	170.972	148.042	141.876	173.689	154.536	0.512306	1
FBgn0010265	RpS13	2L	8363699	1042.45	1058.04	1017.04	1039.18	915.693	952.322	830.302	899.439	1069.8	934.349	900.243	968.131	744.378	733.833	813.53	763.914	876.838	819.685	872.35	856.291	1059.42	990.541	1025.8	1025.25	1017.04	885.668	975.436	959.381	1116.89	1120.41	949.263	1062.19	1261.39	1169.56	1057.62	1162.86	1212.81	1199.57	974.071	1128.82	1323.9	1187.37	1088.77	1200.01	0.0884711	1
FBgn0010269	Dsor1	X	9141375	7.49993	8.62654	7.25821	7.79489	8.45213	9.83709	9.98813	9.42578	5.86843	10.0138	8.75856	8.2136	7.39992	6.54239	6.40321	6.78184	8.14087	7.39316	7.57806	7.70403	7.99282	7.73175	8.64703	8.12387	7.25821	8.92616	7.51678	7.90038	8.29837	8.05099	7.41681	7.92206	6.75336	8.55767	5.70028	7.00377	9.83662	9.60879	9.33087	9.59209	8.09234	8.13269	6.94644	7.72382	0.476664	1
FBgn0010278	Ssrp	2R	19693884	5.26624	7.58151	7.09405	6.64727	6.43157	8.03811	6.39397	6.95455	5.85181	5.4088	5.27366	5.51142	7.77546	6.21941	6.85804	6.95097	6.83297	7.16371	6.9502	6.98229	8.7595	8.2058	8.40697	8.45742	7.09405	9.55332	7.73343	8.12693	6.61453	6.93255	6.40969	6.65226	5.73797	5.69346	6.12302	5.85148	6.88912	6.21521	7.25746	6.78726	7.19918	6.14982	7.16597	6.83832	0.204245	1
FBgn0010280	Taf4	3L	16106323	19.1624	19.9127	22.9802	20.6851	23.2316	22.8862	21.1439	22.4206	18.6716	22.2586	22.9836	21.3046	21.4234	19.746	19.7493	20.3062	21.2052	20.7862	21.342	21.1111	25.1164	22.9653	21.4166	23.1661	22.9802	22.0865	23.9113	22.9927	20.2099	21.8808	18.3152	20.1353	16.1217	16.4229	16.0766	16.2071	24.2789	18.4145	23.7743	22.1559	19.5756	17.7754	19.7064	19.0191	0.997236	1
FBgn0010282	TfIIFalpha	3R	2206189	10.443	12.8939	15.0795	12.8055	13.7674	12.9949	9.44345	12.0686	11.3141	10.9555	11.0626	11.1107	12.8375	11.8426	14.3264	13.0022	13.7548	12.6652	14.1893	13.5364	15.8069	19.0762	15.853	16.912	15.0795	13.0043	11.3387	13.1408	10.9939	10.073	7.11435	9.39375	10.4248	10.2892	10.7622	10.4921	10.1364	7.35043	11.0003	9.49571	8.66081	10.3804	9.23663	9.42595	0.595532	1
FBgn0010287	Trf	2L	8072895	2.402	2.67585	1.58135	2.21973	2.33484	1.03863	2.36955	1.91434	1.65229	3.27258	0.788319	1.9044	2.99715	1.4368	2.40381	2.27925	2.25088	1.10703	1.77804	1.71198	3.17995	2.60657	2.76938	2.85197	1.58135	2.72264	1.47392	1.92597	2.35914	2.40232	1.96063	2.2407	2.63853	1.49157	1.76816	1.96609	2.3122	2.27956	2.90301	2.49826	1.21964	0.930234	2.06153	1.4038	0.877342	1
FBgn0010288	Uch	2L	2212738	17.7701	16.8838	16.0807	16.9115	17.5874	20.8629	14.3428	17.5977	16.0761	15.0987	16.0823	15.7524	11.7062	10.2591	14.2403	12.0685	12.918	14.477	13.0584	13.4845	10.1801	14.4998	11.9204	12.2001	16.0807	13.886	14.5718	14.8462	15.9655	15.3813	16.7567	16.0345	15.0369	11.5162	11.4875	12.6802	13.9956	14.1047	16.7219	14.9407	14.7648	11.2113	12.617	12.8644	0.59178	1
FBgn0010292	bys	X	7795915	8.45499	10.2369	9.84359	9.51183	6.81278	10.102	9.43824	8.78434	7.32105	6.36599	9.71203	7.79969	11.0126	11.2574	12.2746	11.5149	9.17407	9.96964	7.37863	8.84078	9.48489	10.1409	13.3396	10.9885	9.84359	11.328	9.39783	10.1898	14.0542	11.6308	8.80135	11.4954	9.27469	10.3486	10.0892	9.90416	11.6729	10.769	10.962	11.1346	12.6533	9.16832	11.585	11.1355	0.831273	1
FBgn0010294	ng2	X	3134058	0	0	0	0	0.262723	0.311653	0	0.191459	0.247894	1.17837	0.236544	0.554269	0.399701	0.107782	0	0.169161	0	0.22145	0	0.0738167	0.572507	0	0	0.190836	0	0.61272	0	0.20424	0	0.576673	0.543054	0.373242	0	0.268537	0	0.0895123	0	0	0.30744	0.10248	0	0	0	0	0.464252	1
FBgn0010295	ng3	X	3135524	0	0	0	0	0	0.572938	1.68057	0.751169	0	0	0	0	0	0	0.165751	0.0552503	0.532135	0.40711	0.588489	0.509245	0	0	0	0	0	1.12641	0.813052	0.646487	0.244006	0	0.249586	0.164531	0	0.246837	0	0.082279	0	0	0.282596	0.0941987	0.576673	0.615771	0	0.397481	0.134675	1
FBgn0010296	ng4	X	3137984	0	0	0	0	1.07451	0	0	0.35817	0	0	0	0	0.408684	0	0.36875	0.259145	0	0.452853	0	0.150951	0	0	0	0	0	0.835318	0.904406	0.579908	0.542844	0	0.555258	0.366034	0	0	0	0	0	0	0	0	0	0	0	0	1	1
FBgn0010300	brat	2L	19133816	10.011	12.1406	12.5267	11.5594	13.6485	13.6676	13.3918	13.5693	10.423	13.2971	12.9885	12.2362	12.6611	11.0291	9.94984	11.2133	11.5228	11.2864	10.5346	11.1146	10.4079	10.9058	13.6491	11.6543	12.5267	11.8974	12.9116	12.4452	9.72125	10.6758	11.8201	10.7391	7.10187	7.43177	6.84161	7.12508	13.8824	10.0712	13.6724	12.542	9.73238	9.55067	12.4826	10.5885	0.396519	1
FBgn0010303	hep	X	12973240	17.4929	16.6229	14.4879	16.2012	18.5004	19.1943	15.1526	17.6158	14.6886	17.012	15.61	15.7702	17.6679	14.1419	16.2445	16.0181	15.0678	16.4341	15.189	15.5636	20.8138	16.1879	13.5732	16.8583	14.4879	17.296	15.7721	15.852	13.8551	14.5568	13.5387	13.9835	10.9136	11.8844	12.4881	11.762	15.6299	13.2369	16.8037	15.2235	14.0275	13.7046	13.7514	13.8278	0.330382	1
FBgn0010309	pigeon	2L	19186043	2.32846	2.97121	2.04856	2.44941	3.24071	2.98999	3.23668	3.15579	2.2157	3.63381	2.91779	2.92243	2.80756	2.43741	2.28609	2.51035	2.14891	2.46603	2.55929	2.39141	3.72713	2.4119	3.17268	3.1039	2.04856	3.49905	2.72768	2.75843	3.2528	2.86509	2.59573	2.90454	2.44148	2.43832	2.07241	2.3174	3.92246	2.0591	2.94957	2.97704	2.6333	2.69706	2.45902	2.59646	0.892954	1
FBgn0010313	corto	3R	904244	31.8087	34.3866	30.0322	32.0758	32.517	33.2135	32.9578	32.8961	34.0425	33.3624	31.8942	33.0997	32.0277	27.9425	31.8512	30.6071	32.4161	32.6581	34.6536	33.2426	29.2068	25.5767	32.1866	28.99	30.0322	27.668	31.7977	29.8326	24.2256	24.7298	21.6523	23.5359	18.6052	19.4184	22.7578	20.2605	24.4779	22.9622	25.4884	24.3095	21.2546	21.4633	22.7776	21.8318	0.734974	1
[truncated: 14,632 more rows]
[truncated: 54 more columns]
