# Supplementary material
Source: publisher figshare collection journal article supplement (https://gsajournals.figshare.com/articles/dataset/_/11317307)
Supplement: Supplementary file 1 [file 1 › TableS3_PrimerSequences.docx]

**Table S3: Primer Sequences**

| Primer Name | Forward Sequence | Reverse Sequence | Product Length (bp) |
| --- | --- | --- | --- |
| Drs | CCCTCTTCGCTGTCCTGA | TTAGCATCCTTCGCACCAG | 188 |
| Dpt B | CTGATCCCCGAGAGATTGTG | GCTCAGATCGAATCCTTGCT | 143 |
| fit | ACTGCGTTAGGCGTTCGATTGG | TCCATTCGCCTGGCTCATTTGG | 68 |
| Mtk | AACTTAATCTTGGAGCGA | CGGTCTTGGTTGGTTAG | 140 |
| Rp49 | AGGGTATCGACAACAGAGTG | CACCAGGAACTTCTTGAATC | 122 |
| tobi | CTCGATCACGAGGGAAGCTC | CCTTGGTTGGTGGCTTTTCG | 472 |
| Vago | GGGAGGATAGGTAAGCGTGC | CCCCCGAATTCGACTCGTAG | 133 |
