# Supplementary material
Source: publisher figshare collection journal article supplement (https://gsajournals.figshare.com/articles/dataset/_/11317307)
Supplement: Supplementary file 1 [file 1 › TableS4_GOresults.xlsx]

## Sheet: ReadME
Abbreviations:
Vber	Virgin Berlin female										Be sure to scroll all the way to the right to see all lists in each sheet
VFG	Virgin female with a germline (tud/+)
VFN	Virgin female without a germline (tud/+)
1MG	Berlin female mated to a male with a germline (tud/+) (1 day post-mating)
1MN	Berlin female mated to a male without a germline (tud/+) (1 day post-mating)
1FG	Female with a germline (tud/+) mated to Berlin male (1 day post-mating)
1FN	Female without a germline (tud/+) mated to a Berlin male (1 day post-mating)
3MG	Berlin female mated to a male with a germline (tud/+) (3 days post-mating)
3MN	Berlin female mated to a male without a germline (tud/+) (3 days post-mating)
3FG	Female with a germline (tud/+) mated to Berlin male (3 days post-mating)
3FN	Female without a germline (tud/+) mated to a Berlin male (3 days post-mating)
VFN_VFG	Terms in each category from all differentially expressed genes are shown first followed by the terms from those genes that were induced by absence of a germline and the those that are repressed by absence of a germline.
VFG_Vber	Terms in each category from the list of genes that are more highly expressed in the VFG condition followed by those that are more highly expressed in the Vber condition
All other tabs	Terms in each category from the list of genes that are induced by mating followed by those that are repressed by mating in the comparison

## Sheet: VFG_VFN
ALL																				Induced by absence of a germline (higher in virgin females without a germline)																				Repressed by absence of a germline (higher in virgin females with a germline)
Biological Process				Cellular Component				Molecular Function				Protein Domain Enrichment				Pathway Enrichment				Biological Process				Cellular Component				Molecular Function				Protein Domain Enrichment				Pathway Enrichment				Biological Process				Cellular Component				Molecular Function
GO term	GO Identifier	P-value	Genes	GO term	GO Identifier	P-value	Genes	GO term	GO Identifier	P-value	Genes	Protein Domain	IPR Identifier	P-value	Genes	Pathways	Pathway Identifier	P-value	Genes	GO term	GO Identifier	P-value	Genes	GO term	GO Identifier	P-value	Genes	GO term	GO Identifier	P-value	Genes	Protein Domain	IPR Identifier	P-value	Genes	Pathways	Pathway Identifier	P-value	Genes	GO term	GO Identifier	P-value	Genes	GO term	GO Identifier	P-value	Genes	GO term	GO Identifier
single-organism metabolic process	GO:0044710	0.00392698	FBgn0000053,FBgn0000459,FBgn0001125,FBgn0001142,FBgn0003067,FBgn0003965,FBgn0004396,FBgn0005626,FBgn0015035,FBgn0019643,FBgn0020385,FBgn0025454,FBgn0025595,FBgn0027348,FBgn0027579,FBgn0030558,FBgn0031694,FBgn0032405,FBgn0033101,FBgn0033543,FBgn0034117,FBgn0034276,FBgn0034356,FBgn0034387,FBgn0034500,FBgn0034618,FBgn0035348,FBgn0036046,FBgn0036449,FBgn0036659,FBgn0037819,FBgn0038172,FBgn0038467,FBg…	extracellular region	GO:0005576	1.98675e-06	FBgn0002565,FBgn0004047,FBgn0011722,FBgn0025583,FBgn0026403,FBgn0027579,FBgn0031701,FBgn0032773,FBgn0034328,FBgn0035282,FBgn0035791,FBgn0036046,FBgn0036619,FBgn0036876,FBgn0036995,FBgn0038147,FBgn0038172,FBgn0039298,FBgn0039299,FBgn0039800,FBgn0039801,FBgn0040653,FBgn0040736,FBgn0042201,FBgn0044047,FBgn0044048,FBgn0044050,FBgn0051704,FBgn0052029,FBgn0052282,FBgn0267348	hormone activity	GO:0005179	0.000746909	FBgn0035282,FBgn0036046,FBgn0038147,FBgn0042201,FBgn0044047,FBgn0044048,FBgn0044050	Insulin-like	IPR016179	0.00260198	FBgn0036046,FBgn0044047,FBgn0044048,FBgn0044050	Metabolic pathways	1100	9.98593e-06	FBgn0000053,FBgn0001125,FBgn0001142,FBgn0003067,FBgn0003965,FBgn0005626,FBgn0015569,FBgn0019643,FBgn0020385,FBgn0027348,FBgn0027579,FBgn0028540,FBgn0030558,FBgn0033101,FBgn0034276,FBgn0034356,FBgn0034618,FBgn0035348,FBgn0038172,FBgn0038467,FBgn0039094,FBgn0039241,FBgn0043791,FBgn0046114,FBgn0053138,FBgn0260746,FBgn0261575,FBgn0270926	None				None				hormone activity	GO:0005179	0.00915749	FBgn0035282,FBgn0036046,FBgn0038147,FBgn0044048,FBgn0044050	Insulin family	IPR022352	0.0127947	FBgn0036046,FBgn0044048,FBgn0044050	None				muscle cell development	GO:0055001	0.0142521	FBgn0000044,FBgn0002773,FBgn0004169,FBgn0005666,FBgn0264695	actin cytoskeleton	GO:0015629	0.000128903	FBgn0000044,FBgn0000046,FBgn0002773,FBgn0004169,FBgn0005666,FBgn0023540,FBgn0264695	None
single-organism catabolic process	GO:0044712	0.00404536	FBgn0001125,FBgn0003965,FBgn0019643,FBgn0025454,FBgn0025595,FBgn0034117,FBgn0034276,FBgn0034618,FBgn0036449,FBgn0037819,FBgn0038172,FBgn0039094,FBgn0039114,FBgn0040349	extracellular region part	GO:0044421	7.87978e-05	FBgn0002565,FBgn0011722,FBgn0026403,FBgn0027579,FBgn0031701,FBgn0035282,FBgn0035791,FBgn0036046,FBgn0036619,FBgn0036876,FBgn0036995,FBgn0038147,FBgn0038172,FBgn0039298,FBgn0039299,FBgn0039801,FBgn0040653,FBgn0044047,FBgn0044048,FBgn0044050,FBgn0051704,FBgn0052029,FBgn0267348	insulin receptor binding	GO:0005158	0.00921597	FBgn0036046,FBgn0044047,FBgn0044048,FBgn0044050	Immune-induced protein Dim	IPR013172	0.00762352	FBgn0025583,FBgn0034328,FBgn0040735,FBgn0040736	Metabolism	R-DME-1430728	1.31365e-05	FBgn0000053,FBgn0001125,FBgn0001142,FBgn0003067,FBgn0003965,FBgn0004047,FBgn0005626,FBgn0020385,FBgn0025454,FBgn0025814,FBgn0027348,FBgn0027579,FBgn0029765,FBgn0030218,FBgn0030558,FBgn0033543,FBgn0034117,FBgn0034276,FBgn0034356,FBgn0034479,FBgn0034618,FBgn0035348,FBgn0036449,FBgn0037912,FBgn0037913,FBgn0038467,FBgn0039241,FBgn0043791,FBgn0046114,FBgn0053138,FBgn0260746									insulin receptor binding	GO:0005158	0.0264746	FBgn0036046,FBgn0044048,FBgn0044050	Insulin, conserved site	IPR022353	0.0127947	FBgn0036046,FBgn0044048,FBgn0044050					striated muscle cell development	GO:0055002	0.0163896	FBgn0000044,FBgn0002773,FBgn0004169,FBgn0005666,FBgn0264695	extracellular region	GO:0005576	0.00072693	FBgn0011722,FBgn0025583,FBgn0026403,FBgn0027579,FBgn0031701,FBgn0032773,FBgn0034328,FBgn0036619,FBgn0036876,FBgn0038172,FBgn0040653,FBgn0040736,FBgn0042201,FBgn0044047,FBgn0052029,FBgn0267348
small molecule metabolic process	GO:0044281	0.00663955	FBgn0000053,FBgn0000459,FBgn0001125,FBgn0001142,FBgn0003067,FBgn0003965,FBgn0004396,FBgn0005626,FBgn0019643,FBgn0020385,FBgn0027348,FBgn0030558,FBgn0033543,FBgn0034276,FBgn0034356,FBgn0035348,FBgn0036046,FBgn0037819,FBgn0038172,FBgn0038467,FBgn0039094,FBgn0039241,FBgn0040309,FBgn0040349,FBgn0044048,FBgn0270926	extracellular space	GO:0005615	0.00197477	FBgn0002565,FBgn0031701,FBgn0035282,FBgn0035791,FBgn0036046,FBgn0036619,FBgn0036876,FBgn0038147,FBgn0038172,FBgn0039298,FBgn0039299,FBgn0039801,FBgn0040653,FBgn0044047,FBgn0044048,FBgn0044050,FBgn0051704	ligase activity, forming carbon-nitrogen bonds	GO:0016879	0.0177688	FBgn0000053,FBgn0001142,FBgn0020385,FBgn0046114,FBgn0270926	Insulin family	IPR022352	0.0252265	FBgn0036046,FBgn0044048,FBgn0044050	Alanine, aspartate and glutamate metabolism	250	0.00608875	FBgn0001125,FBgn0001142,FBgn0033543,FBgn0038467,FBgn0270926									phosphoenolpyruvate carboxykinase activity	GO:0004611	0.0320202	FBgn0003067,FBgn0034356	Insulin-like	IPR016179	0.0148068	FBgn0036046,FBgn0044048,FBgn0044050					alpha-amino acid catabolic process	GO:1901606	0.0171172	FBgn0001125,FBgn0003965,FBgn0034276,FBgn0039094	basement membrane	GO:0005604	0.00728048	FBgn0011722,FBgn0026403,FBgn0267348
cellular amino acid metabolic process	GO:0006520	0.00820874	FBgn0001125,FBgn0001142,FBgn0003965,FBgn0005626,FBgn0020385,FBgn0030558,FBgn0033543,FBgn0034276,FBgn0039094,FBgn0270926	actin cytoskeleton	GO:0015629	0.00970227	FBgn0000044,FBgn0000046,FBgn0002773,FBgn0004169,FBgn0005666,FBgn0023540,FBgn0264695	hydrolase activity, hydrolyzing O-glycosyl compounds	GO:0004553	0.0271074	FBgn0034117,FBgn0034618,FBgn0036659,FBgn0053138,FBgn0260746,FBgn0261575	Insulin, conserved site	IPR022353	0.0252265	FBgn0036046,FBgn0044048,FBgn0044050	Metabolism of carbohydrates	R-DME-71387	0.0355981	FBgn0001125,FBgn0003067,FBgn0029765,FBgn0034356,FBgn0034618,FBgn0037912,FBgn0053138,FBgn0260746									phosphoenolpyruvate carboxykinase (GTP) activity	GO:0004613	0.0320202	FBgn0003067,FBgn0034356									cellular amino acid metabolic process	GO:0006520	0.0185882	FBgn0001125,FBgn0001142,FBgn0003965,FBgn0020385,FBgn0033543,FBgn0034276,FBgn0039094	extracellular matrix component	GO:0044420	0.00728048	FBgn0011722,FBgn0026403,FBgn0267348
sleep	GO:0030431	0.0250512	FBgn0019643,FBgn0025454,FBgn0027348,FBgn0031305,FBgn0036046,FBgn0036449,FBgn0040732,FBgn0044048,FBgn0044050	lipid droplet	GO:0005811	0.0223024	FBgn0036449,FBgn0039114,FBgn0259682	hydrolase activity, acting on glycosyl bonds	GO:0016798	0.036219	FBgn0034117,FBgn0034618,FBgn0036659,FBgn0053138,FBgn0260746,FBgn0261575	Glycoside hydrolase superfamily	IPR017853	0.0252687	FBgn0034117,FBgn0034618,FBgn0036659,FBgn0053138,FBgn0260746,FBgn0261575	Purine ribonucleoside monophosphate biosynthesis	R-DME-73817	0.0399756	FBgn0000053,FBgn0038467,FBgn0039241																					cellular amino acid catabolic process	GO:0009063	0.0189459	FBgn0001125,FBgn0003965,FBgn0034276,FBgn0039094	myofibril	GO:0030016	0.0128743	FBgn0002773,FBgn0004169,FBgn0005666,FBgn0264695
carboxylic acid metabolic process	GO:0019752	0.0398537	FBgn0001125,FBgn0001142,FBgn0003965,FBgn0005626,FBgn0020385,FBgn0027348,FBgn0030558,FBgn0033543,FBgn0034276,FBgn0037819,FBgn0039094,FBgn0040349,FBgn0270926	basement membrane	GO:0005604	0.0434062	FBgn0011722,FBgn0026403,FBgn0267348	phosphoenolpyruvate carboxykinase activity	GO:0004611	0.0471976	FBgn0003067,FBgn0034356					One carbon pool by folate	670	0.0454475	FBgn0000053,FBgn0020385,FBgn0039241																					muscle system process	GO:0003012	0.0213666	FBgn0002773,FBgn0004169,FBgn0005666,FBgn0264695	extracellular region part	GO:0044421	0.013471	FBgn0011722,FBgn0026403,FBgn0027579,FBgn0031701,FBgn0036619,FBgn0036876,FBgn0038172,FBgn0040653,FBgn0044047,FBgn0052029,FBgn0267348
cellular amino acid biosynthetic process	GO:0008652	0.0420833	FBgn0001125,FBgn0001142,FBgn0020385,FBgn0039094,FBgn0270926	extracellular matrix component	GO:0044420	0.0434062	FBgn0011722,FBgn0026403,FBgn0267348	phosphoenolpyruvate carboxykinase (GTP) activity	GO:0004613	0.0471976	FBgn0003067,FBgn0034356																													cellular amino acid biosynthetic process	GO:0008652	0.0213666	FBgn0001125,FBgn0001142,FBgn0020385,FBgn0039094	supramolecular complex	GO:0099080	0.0144268	FBgn0000044,FBgn0000046,FBgn0002773,FBgn0004169,FBgn0005666,FBgn0264695
alpha-amino acid metabolic process	GO:1901605	0.0448842	FBgn0001125,FBgn0001142,FBgn0003965,FBgn0033543,FBgn0034276,FBgn0039094,FBgn0270926																																					carboxylic acid metabolic process	GO:0019752	0.0229462	FBgn0001125,FBgn0001142,FBgn0003965,FBgn0020385,FBgn0027348,FBgn0033543,FBgn0034276,FBgn0039094,FBgn0040349	supramolecular polymer	GO:0099081	0.0153036	FBgn0000044,FBgn0000046,FBgn0002773,FBgn0004169,FBgn0005666,FBgn0264695
																																								organic acid catabolic process	GO:0016054	0.0249771	FBgn0001125,FBgn0003965,FBgn0034276,FBgn0039094,FBgn0040349	contractile fiber	GO:0043292	0.0155399	FBgn0002773,FBgn0004169,FBgn0005666,FBgn0264695
																																								carboxylic acid catabolic process	GO:0046395	0.0249771	FBgn0001125,FBgn0003965,FBgn0034276,FBgn0039094,FBgn0040349	supramolecular fiber	GO:0099512	0.0164796	FBgn0000044,FBgn0000046,FBgn0002773,FBgn0004169,FBgn0005666,FBgn0264695
																																								single-organism catabolic process	GO:0044712	0.0265871	FBgn0001125,FBgn0003965,FBgn0025454,FBgn0034276,FBgn0034618,FBgn0036449,FBgn0038172,FBgn0039094,FBgn0040349	myosin complex	GO:0016459	0.0218019	FBgn0002773,FBgn0005666,FBgn0264695
																																								organic acid metabolic process	GO:0006082	0.026999	FBgn0001125,FBgn0001142,FBgn0003965,FBgn0020385,FBgn0027348,FBgn0033543,FBgn0034276,FBgn0039094,FBgn0040349
																																								oxoacid metabolic process	GO:0043436	0.026999	FBgn0001125,FBgn0001142,FBgn0003965,FBgn0020385,FBgn0027348,FBgn0033543,FBgn0034276,FBgn0039094,FBgn0040349
																																								myofibril assembly	GO:0030239	0.0289245	FBgn0002773,FBgn0004169,FBgn0005666,FBgn0264695
																																								single-organism biosynthetic process	GO:0044711	0.0296708	FBgn0000053,FBgn0001125,FBgn0001142,FBgn0003965,FBgn0020385,FBgn0027579,FBgn0034618,FBgn0038467,FBgn0039094,FBgn0039241,FBgn0053138
																																								alpha-amino acid metabolic process	GO:1901605	0.0316383	FBgn0001125,FBgn0001142,FBgn0003965,FBgn0033543,FBgn0034276,FBgn0039094
[truncated: 10 more columns]

## Sheet: VFG_VBer
Higher in VFG																				Higher in Vber
Biological Process				Cellular Component				Molecular Function				Protein Domain Enrichment				Pathway Enrichment				Biological Process				Cellular Component				Molecular Function				Protein Domain Enrichment				Pathway Enrichment
GO term	GO Identifier	P-value	Genes	GO term	GO Identifier	P-value	Genes	GO term	GO Identifier	P-value	Genes	Protein Domain	IPR Identifier	P-value	Genes	Pathways	Pathway Identifier	P-value	Genes	GO term	GO Identifier	P-value	Genes	GO term	GO Identifier	P-value	Genes	GO term	GO Identifier	P-value	Genes	Protein Domain	IPR Identifier	P-value	Genes	Pathways	Pathway Identifier	P-value	Genes
oxidation-reduction process	GO:0055114	0.000876861	FBgn0000406,FBgn0000473,FBgn0000565,FBgn0002937,FBgn0013675,FBgn0026268,FBgn0030588,FBgn0030589,FBgn0031694,FBgn0032945,FBgn0033093,FBgn0033205,FBgn0033367,FBgn0033520,FBgn0033521,FBgn0033978,FBgn0036290,FBgn0036750,FBgn0036910,FBgn0036992,FBgn0038236,FBgn0038516,FBgn0040211,FBgn0040349,FBgn0050489,FBgn0051075,FBgn0053503,FBgn0283437	None				oxidoreductase activity	GO:0016491	0.000203128	FBgn0000406,FBgn0000473,FBgn0000565,FBgn0002937,FBgn0013675,FBgn0026268,FBgn0030588,FBgn0030589,FBgn0031694,FBgn0032945,FBgn0033093,FBgn0033205,FBgn0033367,FBgn0033520,FBgn0033521,FBgn0033978,FBgn0036290,FBgn0036750,FBgn0036910,FBgn0036992,FBgn0038236,FBgn0038516,FBgn0040211,FBgn0040349,FBgn0050489,FBgn0051075,FBgn0053503,FBgn0283437	None				Biological oxidations	R-DME-211859	0.00175243	FBgn0000473,FBgn0025814,FBgn0030484,FBgn0030882,FBgn0033978,FBgn0036750,FBgn0037697,FBgn0038236,FBgn0039052,FBgn0052495	cytoplasmic translation	GO:0002181	6.27177e-09	FBgn0002593,FBgn0002622,FBgn0004403,FBgn0010078,FBgn0010198,FBgn0010265,FBgn0011284,FBgn0019936,FBgn0020910,FBgn0023170,FBgn0024733,FBgn0029897,FBgn0033555,FBgn0039359,FBgn0039857,FBgn0066084,FBgn0086710,FBgn0261596,FBgn0261599	ribosomal subunit	GO:0044391	9.95571e-07	FBgn0002593,FBgn0002622,FBgn0004403,FBgn0010078,FBgn0010198,FBgn0010265,FBgn0011284,FBgn0019936,FBgn0020910,FBgn0023170,FBgn0024733,FBgn0029897,FBgn0033555,FBgn0039359,FBgn0039857,FBgn0066084,FBgn0086710,FBgn0261596,FBgn0261599	structural constituent of ribosome	GO:0003735	0.000732677	FBgn0002593,FBgn0002622,FBgn0004403,FBgn0010078,FBgn0010198,FBgn0010265,FBgn0011284,FBgn0019936,FBgn0020910,FBgn0023170,FBgn0024733,FBgn0029897,FBgn0033555,FBgn0039359,FBgn0039857,FBgn0066084,FBgn0086710,FBgn0261596,FBgn0261599	Cecropin, diptera	IPR020400	0.000733664	FBgn0000276,FBgn0000277,FBgn0000278,FBgn0000279	Ribosome	3010	2.16639e-11	FBgn0002593,FBgn0002622,FBgn0004403,FBgn0010078,FBgn0010198,FBgn0010265,FBgn0011284,FBgn0019936,FBgn0020910,FBgn0023170,FBgn0024733,FBgn0029897,FBgn0033555,FBgn0039359,FBgn0039857,FBgn0066084,FBgn0086710,FBgn0261596,FBgn0261599
single-organism metabolic process	GO:0044710	0.00112165	FBgn0000406,FBgn0000473,FBgn0000565,FBgn0001234,FBgn0002937,FBgn0003748,FBgn0013675,FBgn0023511,FBgn0026268,FBgn0027348,FBgn0027550,FBgn0027843,FBgn0028519,FBgn0030588,FBgn0030589,FBgn0030828,FBgn0031381,FBgn0031694,FBgn0032945,FBgn0033093,FBgn0033205,FBgn0033367,FBgn0033520,FBgn0033521,FBgn0033978,FBgn0034117,FBgn0035977,FBgn0036290,FBgn0036560,FBgn0036750,FBgn0036752,FBgn0036910,FBgn0036992,FBg…					catalytic activity	GO:0003824	0.00568615	FBgn0000406,FBgn0000473,FBgn0000565,FBgn0002905,FBgn0002937,FBgn0003082,FBgn0003748,FBgn0004629,FBgn0013675,FBgn0023511,FBgn0025814,FBgn0026206,FBgn0026268,FBgn0027074,FBgn0027348,FBgn0027843,FBgn0027932,FBgn0028519,FBgn0028984,FBgn0029828,FBgn0030588,FBgn0030589,FBgn0030773,FBgn0030828,FBgn0030882,FBgn0031081,FBgn0031694,FBgn0032387,FBgn0032945,FBgn0033093,FBgn0033205,FBgn0033367,FBgn0033520,FBg…					Tyrosine metabolism	350	0.00197683	FBgn0036992,FBgn0037697,FBgn0040211,FBgn0042175,FBgn0283437	antibacterial humoral response	GO:0019731	5.75065e-08	FBgn0000276,FBgn0000277,FBgn0000278,FBgn0000279,FBgn0004240,FBgn0012042,FBgn0014018,FBgn0014865,FBgn0040736,FBgn0041579,FBgn0041581,FBgn0283462	cytosolic ribosome	GO:0022626	2.43978e-06	FBgn0002593,FBgn0002622,FBgn0004403,FBgn0010078,FBgn0010198,FBgn0010265,FBgn0011284,FBgn0019936,FBgn0020910,FBgn0023170,FBgn0024733,FBgn0029897,FBgn0033555,FBgn0039359,FBgn0039857,FBgn0066084,FBgn0086710,FBgn0261596,FBgn0261599					Cecropin	IPR000875	0.00180852	FBgn0000276,FBgn0000277,FBgn0000278,FBgn0000279	GTP hydrolysis and joining of the 60S ribosomal subunit	R-DME-72706	1.03122e-10	FBgn0002593,FBgn0002622,FBgn0004403,FBgn0010078,FBgn0010198,FBgn0010265,FBgn0011284,FBgn0019936,FBgn0020910,FBgn0023170,FBgn0024733,FBgn0029897,FBgn0033555,FBgn0039359,FBgn0039857,FBgn0086710,FBgn0261596,FBgn0261599
response to toxic substance	GO:0009636	0.0358774	FBgn0000473,FBgn0004118,FBgn0030882,FBgn0033520,FBgn0033521,FBgn0050489,FBgn0052495,FBgn0053503													Metabolism	R-DME-1430728	0.0022514	FBgn0000473,FBgn0002937,FBgn0025814,FBgn0027348,FBgn0027843,FBgn0028519,FBgn0030484,FBgn0030828,FBgn0030882,FBgn0032785,FBgn0032945,FBgn0033978,FBgn0034117,FBgn0036272,FBgn0036623,FBgn0036750,FBgn0036992,FBgn0037697,FBgn0038236,FBgn0038516,FBgn0039052,FBgn0039341,FBgn0040211,FBgn0042175,FBgn0050295,FBgn0050382,FBgn0051683,FBgn0052495,FBgn0259734,FBgn0263121	defense response to Gram-positive bacterium	GO:0050830	1.42177e-05	FBgn0000276,FBgn0000277,FBgn0000278,FBgn0000279,FBgn0012042,FBgn0014865,FBgn0033593,FBgn0034407,FBgn0041579,FBgn0041581	cytosolic part	GO:0044445	3.14948e-05	FBgn0002593,FBgn0002622,FBgn0004403,FBgn0004852,FBgn0010078,FBgn0010198,FBgn0010265,FBgn0011284,FBgn0019936,FBgn0020910,FBgn0023170,FBgn0024733,FBgn0029897,FBgn0033555,FBgn0039359,FBgn0039857,FBgn0066084,FBgn0086710,FBgn0261596,FBgn0261599					Attacin, C-terminal	IPR005521	0.00180852	FBgn0012042,FBgn0034407,FBgn0041579,FBgn0041581	Formation of a pool of free 40S subunits	R-DME-72689	1.19003e-10	FBgn0002593,FBgn0002622,FBgn0004403,FBgn0010078,FBgn0010198,FBgn0010265,FBgn0011284,FBgn0019936,FBgn0020910,FBgn0023170,FBgn0024733,FBgn0027619,FBgn0029897,FBgn0033555,FBgn0039359,FBgn0039857,FBgn0086710,FBgn0261596,FBgn0261599
response to DDT	GO:0046680	0.0404626	FBgn0000473,FBgn0050489,FBgn0053503													Glutathione metabolism	480	0.00299154	FBgn0025814,FBgn0030484,FBgn0030882,FBgn0036272,FBgn0037697,FBgn0052495,FBgn0063498	response to bacterium	GO:0009617	2.49222e-05	FBgn0000276,FBgn0000277,FBgn0000278,FBgn0000279,FBgn0004240,FBgn0012042,FBgn0014018,FBgn0014865,FBgn0025583,FBgn0033593,FBgn0033980,FBgn0034407,FBgn0035089,FBgn0035975,FBgn0040736,FBgn0041182,FBgn0041579,FBgn0041581,FBgn0067905,FBgn0283462	cytosolic large ribosomal subunit	GO:0022625	3.90996e-05	FBgn0002593,FBgn0010078,FBgn0020910,FBgn0023170,FBgn0024733,FBgn0029897,FBgn0039359,FBgn0039857,FBgn0066084,FBgn0086710					Cytochrome P450, conserved site	IPR017972	0.0199008	FBgn0005670,FBgn0013772,FBgn0015035,FBgn0015038,FBgn0015714,FBgn0031925,FBgn0033065,FBgn0033397,FBgn0033980	Nonsense Mediated Decay (NMD) independent of the Exon Junction Complex (EJC)	R-DME-975956	1.38561e-10	FBgn0002593,FBgn0002622,FBgn0004403,FBgn0010078,FBgn0010198,FBgn0010265,FBgn0011284,FBgn0019936,FBgn0020910,FBgn0023170,FBgn0024733,FBgn0029897,FBgn0033555,FBgn0039359,FBgn0039857,FBgn0086710,FBgn0261596,FBgn0261599
response to insecticide	GO:0017085	0.0429517	FBgn0000473,FBgn0004118,FBgn0050489,FBgn0053503													Glutathione conjugation	R-DME-156590	0.00612022	FBgn0025814,FBgn0030484,FBgn0030882,FBgn0037697,FBgn0052495	defense response	GO:0006952	9.09041e-05	FBgn0000276,FBgn0000277,FBgn0000278,FBgn0000279,FBgn0004240,FBgn0012042,FBgn0014018,FBgn0014865,FBgn0025583,FBgn0030262,FBgn0030270,FBgn0033593,FBgn0033980,FBgn0034407,FBgn0035975,FBgn0040734,FBgn0040736,FBgn0041182,FBgn0041579,FBgn0041581,FBgn0043578,FBgn0067905,FBgn0087007,FBgn0087035,FBgn0283462	cytosolic small ribosomal subunit	GO:0022627	5.1122e-05	FBgn0002622,FBgn0004403,FBgn0010198,FBgn0010265,FBgn0011284,FBgn0019936,FBgn0033555,FBgn0261596,FBgn0261599					Cytochrome P450	IPR001128	0.0292427	FBgn0005670,FBgn0013772,FBgn0015035,FBgn0015038,FBgn0015714,FBgn0031925,FBgn0033065,FBgn0033397,FBgn0033980	SRP-dependent cotranslational protein targeting to membrane	R-DME-1799339	1.42465e-10	FBgn0002593,FBgn0002622,FBgn0004403,FBgn0010078,FBgn0010198,FBgn0010265,FBgn0011284,FBgn0019936,FBgn0020910,FBgn0023170,FBgn0024733,FBgn0029897,FBgn0033555,FBgn0039359,FBgn0039857,FBgn0086710,FBgn0261596,FBgn0261599
sleep	GO:0030431	0.0486946	FBgn0027348,FBgn0027657,FBgn0028519,FBgn0032785,FBgn0034136,FBgn0036022,FBgn0038733,FBgn0085434,FBgn0261262,FBgn0283437													Phase II - Conjugation of compounds	R-DME-156580	0.0431473	FBgn0025814,FBgn0030484,FBgn0030882,FBgn0037697,FBgn0052495	response to biotic stimulus	GO:0009607	0.000110218	FBgn0000276,FBgn0000277,FBgn0000278,FBgn0000279,FBgn0004240,FBgn0012042,FBgn0014018,FBgn0014865,FBgn0025583,FBgn0030262,FBgn0030270,FBgn0033593,FBgn0033980,FBgn0034407,FBgn0035089,FBgn0035975,FBgn0038299,FBgn0040736,FBgn0041182,FBgn0041579,FBgn0041581,FBgn0067905,FBgn0087035,FBgn0283462	extracellular region	GO:0005576	0.000128745	FBgn0000276,FBgn0000277,FBgn0000278,FBgn0000279,FBgn0000564,FBgn0001257,FBgn0002121,FBgn0002563,FBgn0005664,FBgn0011283,FBgn0012042,FBgn0014865,FBgn0025583,FBgn0026761,FBgn0027611,FBgn0030262,FBgn0030270,FBgn0032889,FBgn0033593,FBgn0033730,FBgn0034407,FBgn0034470,FBgn0035089,FBgn0035282,FBgn0036875,FBgn0036995,FBgn0037396,FBgn0038142,FBgn0038299,FBgn0040582,FBgn0040609,FBgn0040734,FBgn0040736,FBg…					Attacin, N-terminal	IPR005520	0.0329858	FBgn0012042,FBgn0041579,FBgn0041581	L13a-mediated translational silencing of Ceruloplasmin expression	R-DME-156827	6.42976e-10	FBgn0002593,FBgn0002622,FBgn0004403,FBgn0010078,FBgn0010198,FBgn0010265,FBgn0011284,FBgn0019936,FBgn0020910,FBgn0023170,FBgn0024733,FBgn0027619,FBgn0029897,FBgn0033555,FBgn0039359,FBgn0039857,FBgn0086710,FBgn0261596,FBgn0261599
																				response to external biotic stimulus	GO:0043207	0.000110218	FBgn0000276,FBgn0000277,FBgn0000278,FBgn0000279,FBgn0004240,FBgn0012042,FBgn0014018,FBgn0014865,FBgn0025583,FBgn0030262,FBgn0030270,FBgn0033593,FBgn0033980,FBgn0034407,FBgn0035089,FBgn0035975,FBgn0038299,FBgn0040736,FBgn0041182,FBgn0041579,FBgn0041581,FBgn0067905,FBgn0087035,FBgn0283462	extracellular space	GO:0005615	0.000136281	FBgn0000276,FBgn0000277,FBgn0000278,FBgn0000279,FBgn0000564,FBgn0001257,FBgn0002563,FBgn0011283,FBgn0012042,FBgn0026761,FBgn0030262,FBgn0030270,FBgn0033593,FBgn0034407,FBgn0034470,FBgn0035089,FBgn0035282,FBgn0036875,FBgn0037396,FBgn0038299,FBgn0040582,FBgn0040734,FBgn0041182,FBgn0041579,FBgn0041581,FBgn0260462,FBgn0283462									Eukaryotic Translation Initiation	R-DME-72613	1.44007e-09	FBgn0002593,FBgn0002622,FBgn0004403,FBgn0010078,FBgn0010198,FBgn0010265,FBgn0011284,FBgn0019936,FBgn0020910,FBgn0023170,FBgn0024733,FBgn0027619,FBgn0029897,FBgn0033555,FBgn0039359,FBgn0039857,FBgn0086710,FBgn0261596,FBgn0261599
																				response to other organism	GO:0051707	0.000110218	FBgn0000276,FBgn0000277,FBgn0000278,FBgn0000279,FBgn0004240,FBgn0012042,FBgn0014018,FBgn0014865,FBgn0025583,FBgn0030262,FBgn0030270,FBgn0033593,FBgn0033980,FBgn0034407,FBgn0035089,FBgn0035975,FBgn0038299,FBgn0040736,FBgn0041182,FBgn0041579,FBgn0041581,FBgn0067905,FBgn0087035,FBgn0283462	ribosome	GO:0005840	0.000137302	FBgn0002593,FBgn0002622,FBgn0004403,FBgn0010078,FBgn0010198,FBgn0010265,FBgn0011284,FBgn0019936,FBgn0020910,FBgn0023170,FBgn0024733,FBgn0029897,FBgn0033555,FBgn0039359,FBgn0039857,FBgn0066084,FBgn0086710,FBgn0261596,FBgn0261599									Cap-dependent Translation Initiation	R-DME-72737	1.44007e-09	FBgn0002593,FBgn0002622,FBgn0004403,FBgn0010078,FBgn0010198,FBgn0010265,FBgn0011284,FBgn0019936,FBgn0020910,FBgn0023170,FBgn0024733,FBgn0027619,FBgn0029897,FBgn0033555,FBgn0039359,FBgn0039857,FBgn0086710,FBgn0261596,FBgn0261599
																				antimicrobial humoral response	GO:0019730	0.000241303	FBgn0000276,FBgn0000277,FBgn0000278,FBgn0000279,FBgn0004240,FBgn0012042,FBgn0014018,FBgn0014865,FBgn0040736,FBgn0041579,FBgn0041581,FBgn0283462	extracellular region part	GO:0044421	0.00106905	FBgn0000276,FBgn0000277,FBgn0000278,FBgn0000279,FBgn0000564,FBgn0001257,FBgn0002121,FBgn0002563,FBgn0005664,FBgn0011283,FBgn0012042,FBgn0026761,FBgn0030262,FBgn0030270,FBgn0033593,FBgn0033730,FBgn0034407,FBgn0034470,FBgn0035089,FBgn0035282,FBgn0036875,FBgn0036995,FBgn0037396,FBgn0038299,FBgn0040582,FBgn0040734,FBgn0041182,FBgn0041579,FBgn0041581,FBgn0260462,FBgn0283462									Nonsense-Mediated Decay (NMD)	R-DME-927802	1.66341e-09	FBgn0002593,FBgn0002622,FBgn0004403,FBgn0010078,FBgn0010198,FBgn0010265,FBgn0011284,FBgn0019936,FBgn0020910,FBgn0023170,FBgn0024733,FBgn0029897,FBgn0033555,FBgn0039359,FBgn0039857,FBgn0086710,FBgn0261596,FBgn0261599
																				humoral immune response	GO:0006959	0.000245886	FBgn0000276,FBgn0000277,FBgn0000278,FBgn0000279,FBgn0004240,FBgn0012042,FBgn0014018,FBgn0014865,FBgn0034407,FBgn0040736,FBgn0041579,FBgn0041581,FBgn0283462	small ribosomal subunit	GO:0015935	0.00160041	FBgn0002622,FBgn0004403,FBgn0010198,FBgn0010265,FBgn0011284,FBgn0019936,FBgn0033555,FBgn0261596,FBgn0261599									Nonsense Mediated Decay (NMD) enhanced by the Exon Junction Complex (EJC)	R-DME-975957	1.66341e-09	FBgn0002593,FBgn0002622,FBgn0004403,FBgn0010078,FBgn0010198,FBgn0010265,FBgn0011284,FBgn0019936,FBgn0020910,FBgn0023170,FBgn0024733,FBgn0029897,FBgn0033555,FBgn0039359,FBgn0039857,FBgn0086710,FBgn0261596,FBgn0261599
																				response to stress	GO:0006950	0.000519018	FBgn0000276,FBgn0000277,FBgn0000278,FBgn0000279,FBgn0001223,FBgn0002622,FBgn0004240,FBgn0004852,FBgn0010590,FBgn0010651,FBgn0011296,FBgn0012042,FBgn0014018,FBgn0014865,FBgn0020618,FBgn0025583,FBgn0026761,FBgn0030262,FBgn0030270,FBgn0031857,FBgn0031907,FBgn0033593,FBgn0033926,FBgn0033980,FBgn0034140,FBgn0034407,FBgn0034914,FBgn0035227,FBgn0035438,FBgn0035975,FBgn0037327,FBgn0038074,FBgn0038473,FBg…	large ribosomal subunit	GO:0015934	0.00280221	FBgn0002593,FBgn0010078,FBgn0020910,FBgn0023170,FBgn0024733,FBgn0029897,FBgn0039359,FBgn0039857,FBgn0066084,FBgn0086710									Translation	R-DME-72766	8.8418e-06	FBgn0002593,FBgn0002622,FBgn0004403,FBgn0010078,FBgn0010198,FBgn0010265,FBgn0011284,FBgn0019936,FBgn0020910,FBgn0023170,FBgn0024733,FBgn0027619,FBgn0029897,FBgn0033555,FBgn0039359,FBgn0039857,FBgn0086710,FBgn0261596,FBgn0261599
																				defense response to other organism	GO:0098542	0.000685902	FBgn0000276,FBgn0000277,FBgn0000278,FBgn0000279,FBgn0004240,FBgn0012042,FBgn0014018,FBgn0014865,FBgn0030262,FBgn0030270,FBgn0033593,FBgn0033980,FBgn0034407,FBgn0040736,FBgn0041182,FBgn0041579,FBgn0041581,FBgn0087035,FBgn0283462													Formation of the ternary complex, and subsequently, the 43S complex	R-DME-72695	2.90142e-05	FBgn0002622,FBgn0004403,FBgn0010198,FBgn0010265,FBgn0011284,FBgn0019936,FBgn0027619,FBgn0033555,FBgn0261596,FBgn0261599
																				defense response to bacterium	GO:0042742	0.000759644	FBgn0000276,FBgn0000277,FBgn0000278,FBgn0000279,FBgn0004240,FBgn0012042,FBgn0014018,FBgn0014865,FBgn0033593,FBgn0033980,FBgn0034407,FBgn0040736,FBgn0041182,FBgn0041579,FBgn0041581,FBgn0283462													Translation initiation complex formation	R-DME-72649	0.000148148	FBgn0002622,FBgn0004403,FBgn0010198,FBgn0010265,FBgn0011284,FBgn0019936,FBgn0027619,FBgn0033555,FBgn0261596,FBgn0261599
																				defense response to Gram-negative bacterium	GO:0050829	0.00145213	FBgn0000276,FBgn0000277,FBgn0000278,FBgn0000279,FBgn0004240,FBgn0012042,FBgn0014018,FBgn0014865,FBgn0033593,FBgn0033980,FBgn0041182													Activation of the mRNA upon binding of the cap-binding complex and eIFs, and subsequent binding to 43S	R-DME-72662	0.000158033	FBgn0002622,FBgn0004403,FBgn0010198,FBgn0010265,FBgn0011284,FBgn0019936,FBgn0027619,FBgn0033555,FBgn0261596,FBgn0261599
																				oxidation-reduction process	GO:0055114	0.0424391	FBgn0005670,FBgn0010222,FBgn0012036,FBgn0013681,FBgn0013772,FBgn0015035,FBgn0015038,FBgn0015714,FBgn0020618,FBgn0023507,FBgn0031925,FBgn0032116,FBgn0032819,FBgn0032889,FBgn0033065,FBgn0033101,FBgn0033397,FBgn0033879,FBgn0033980,FBgn0034145,FBgn0034390,FBgn0034628,FBgn0034943,FBgn0035438,FBgn0037298,FBgn0037819,FBgn0039827,FBgn0053092,FBgn0263987													Ribosomal scanning and start codon recognition	R-DME-72702	0.000158033	FBgn0002622,FBgn0004403,FBgn0010198,FBgn0010265,FBgn0011284,FBgn0019936,FBgn0027619,FBgn0033555,FBgn0261596,FBgn0261599
																				carboxylic acid metabolic process	GO:0019752	0.0424625	FBgn0010222,FBgn0012036,FBgn0013307,FBgn0013772,FBgn0014455,FBgn0023507,FBgn0027580,FBgn0033879,FBgn0034390,FBgn0034628,FBgn0036821,FBgn0036975,FBgn0037819,FBgn0038074,FBgn0038662,FBgn0039827,FBgn0261625,FBgn0263987													Major pathway of rRNA processing in the nucleolus and cytosol	R-DME-6791226	0.00232197	FBgn0002622,FBgn0004403,FBgn0010198,FBgn0010265,FBgn0011284,FBgn0019936,FBgn0032919,FBgn0033555,FBgn0038473,FBgn0261596,FBgn0261599
																				immune response	GO:0006955	0.0463626	FBgn0000276,FBgn0000277,FBgn0000278,FBgn0000279,FBgn0004240,FBgn0012042,FBgn0014018,FBgn0014865,FBgn0034407,FBgn0035975,FBgn0037396,FBgn0040736,FBgn0041579,FBgn0041581,FBgn0043578,FBgn0087007,FBgn0283462													rRNA processing	R-DME-72312	0.00232197	FBgn0002622,FBgn0004403,FBgn0010198,FBgn0010265,FBgn0011284,FBgn0019936,FBgn0032919,FBgn0033555,FBgn0038473,FBgn0261596,FBgn0261599
																																				rRNA processing in the nucleus and cytosol	R-DME-8868773	0.00232197	FBgn0002622,FBgn0004403,FBgn0010198,FBgn0010265,FBgn0011284,FBgn0019936,FBgn0032919,FBgn0033555,FBgn0038473,FBgn0261596,FBgn0261599
																																				Metabolism	R-DME-1430728	0.00486604	FBgn0004852,FBgn0010222,FBgn0010590,FBgn0012036,FBgn0013307,FBgn0013672,FBgn0013772,FBgn0014455,FBgn0015038,FBgn0015714,FBgn0023507,FBgn0027580,FBgn0027611,FBgn0030013,FBgn0030041,FBgn0030218,FBgn0031489,FBgn0031913,FBgn0032820,FBgn0032889,FBgn0033065,FBgn0033170,FBgn0033373,FBgn0033760,FBgn0033836,FBgn0033879,FBgn0034145,FBgn0034356,FBgn0034390,FBgn0034479,FBgn0034538,FBgn0034628,FBgn0036821,FBg…
																																				Metabolism of RNA	R-DME-8953854	0.029904	FBgn0002593,FBgn0002622,FBgn0004403,FBgn0010078,FBgn0010198,FBgn0010265,FBgn0010590,FBgn0011284,FBgn0011296,FBgn0019936,FBgn0020910,FBgn0023170,FBgn0024733,FBgn0029897,FBgn0032919,FBgn0033555,FBgn0038473,FBgn0039359,FBgn0039857,FBgn0086710,FBgn0261596,FBgn0261599

## Sheet: 1FG_VFG
Induced by Mating																				Repressed by mating
Biological Process				Cellular Component				Molecular Function				Protein Domain Enrichment				Pathway Enrichment				Biological Process				Cellular Component				Molecular Function				Protein Domain Enrichment				Pathway Enrichment
GO term	GO Identifier	P-value	Genes	GO term	GO Identifier	P-value	Genes	GO term	GO Identifier	P-value	Genes	Protein Domain	IPR Identifier	P-value	Genes	Pathways	Pathway Identifier	P-value	Genes	GO term	GO Identifier	P-value	Genes	GO term	GO Identifier	P-value	Genes	GO term	GO Identifier	P-value	Genes	Protein Domain	IPR Identifier	P-value	Genes	Pathways	Pathway Identifier	P-value	Genes
cellular amino acid metabolic process	GO:0006520	1.19947e-10	FBgn0000566,FBgn0001145,FBgn0002069,FBgn0003965,FBgn0005674,FBgn0014455,FBgn0023129,FBgn0023535,FBgn0027079,FBgn0027080,FBgn0027086,FBgn0027088,FBgn0027091,FBgn0027094,FBgn0029823,FBgn0030482,FBgn0031497,FBgn0031824,FBgn0032287,FBgn0034390,FBgn0034401,FBgn0035911,FBgn0037801,FBgn0038074,FBgn0039094,FBgn0039175,FBgn0039849,FBgn0086443,FBgn0270926	nucleolus	GO:0005730	1.77042e-10	FBgn0002780,FBgn0003062,FBgn0003278,FBgn0011824,FBgn0013269,FBgn0015393,FBgn0016685,FBgn0019938,FBgn0020909,FBgn0026079,FBgn0026196,FBgn0028744,FBgn0030067,FBgn0031736,FBgn0032408,FBgn0033379,FBgn0033485,FBgn0033741,FBgn0034734,FBgn0036254,FBgn0036514,FBgn0037137,FBgn0037810,FBgn0038146,FBgn0038473,FBgn0038964,FBgn0039182,FBgn0052418,FBgn0259937,FBgn0263396,FBgn0266581	aminoacyl-tRNA ligase activity	GO:0004812	4.71391e-06	FBgn0002069,FBgn0005674,FBgn0027079,FBgn0027080,FBgn0027086,FBgn0027088,FBgn0027091,FBgn0027094,FBgn0031497,FBgn0034401,FBgn0039175,FBgn0086443	Rossmann-like alpha/beta/alpha sandwich fold	IPR014729	0.003186	FBgn0005674,FBgn0020389,FBgn0027079,FBgn0027080,FBgn0027086,FBgn0027091,FBgn0032482,FBgn0033375,FBgn0034401,FBgn0053123	Protein export	3060	2.54265e-09	FBgn0001218,FBgn0010391,FBgn0010638,FBgn0011509,FBgn0030306,FBgn0031049,FBgn0033691,FBgn0035771,FBgn0035947,FBgn0038808,FBgn0038810,FBgn0086357,FBgn0262801	oxidation-reduction process	GO:0055114	1.41254e-07	FBgn0000261,FBgn0000406,FBgn0001112,FBgn0002719,FBgn0010548,FBgn0011754,FBgn0011768,FBgn0013771,FBgn0015040,FBgn0022359,FBgn0022768,FBgn0025454,FBgn0026428,FBgn0030589,FBgn0030968,FBgn0031182,FBgn0031418,FBgn0031432,FBgn0031689,FBgn0032775,FBgn0033093,FBgn0033820,FBgn0033978,FBgn0033981,FBgn0036211,FBgn0036428,FBgn0036910,FBgn0036992,FBgn0037643,FBgn0038037,FBgn0038149,FBgn0038349,FBgn0038516,FBg…	extracellular region	GO:0005576	8.82567e-07	FBgn0000116,FBgn0002565,FBgn0003390,FBgn0004629,FBgn0013763,FBgn0022355,FBgn0026061,FBgn0027586,FBgn0027611,FBgn0028526,FBgn0029093,FBgn0030398,FBgn0030828,FBgn0031381,FBgn0032213,FBgn0032494,FBgn0033268,FBgn0033320,FBgn0033799,FBgn0034162,FBgn0034229,FBgn0034468,FBgn0034474,FBgn0034509,FBgn0035434,FBgn0036619,FBgn0036880,FBgn0038105,FBgn0038198,FBgn0038422,FBgn0039102,FBgn0039483,FBgn0039678,FBg…	oxidoreductase activity	GO:0016491	1.24073e-07	FBgn0000261,FBgn0000406,FBgn0001112,FBgn0002719,FBgn0010548,FBgn0011768,FBgn0013771,FBgn0015040,FBgn0022359,FBgn0022768,FBgn0025454,FBgn0030589,FBgn0030968,FBgn0031182,FBgn0031418,FBgn0031432,FBgn0031689,FBgn0032775,FBgn0033093,FBgn0033820,FBgn0033978,FBgn0033981,FBgn0036211,FBgn0036910,FBgn0036992,FBgn0038037,FBgn0038149,FBgn0038349,FBgn0038516,FBgn0038610,FBgn0038680,FBgn0040211,FBgn0040349,FBg…	Cytochrome P450, conserved site	IPR017972	1.80975e-06	FBgn0013771,FBgn0015040,FBgn0025454,FBgn0031182,FBgn0031432,FBgn0031689,FBgn0033978,FBgn0033981,FBgn0036910,FBgn0038037,FBgn0038680,FBgn0041337,FBgn0050489,FBgn0053503	Metabolism	R-DME-1430728	3.98587e-06	FBgn0000116,FBgn0001124,FBgn0003067,FBgn0003189,FBgn0010053,FBgn0010548,FBgn0011754,FBgn0011768,FBgn0013771,FBgn0015040,FBgn0016013,FBgn0020236,FBgn0022359,FBgn0025454,FBgn0025814,FBgn0026061,FBgn0027348,FBgn0027611,FBgn0027843,FBgn0028399,FBgn0028519,FBgn0029765,FBgn0030484,FBgn0030828,FBgn0030968,FBgn0031182,FBgn0032076,FBgn0032775,FBgn0032785,FBgn0033717,FBgn0033978,FBgn0033981,FBgn0034117,FBg…
ncRNA metabolic process	GO:0034660	2.99571e-09	FBgn0002069,FBgn0003062,FBgn0005674,FBgn0011824,FBgn0015393,FBgn0022069,FBgn0026079,FBgn0026196,FBgn0027079,FBgn0027080,FBgn0027086,FBgn0027088,FBgn0027091,FBgn0027094,FBgn0028744,FBgn0030067,FBgn0030720,FBgn0031227,FBgn0031497,FBgn0031736,FBgn0032408,FBgn0032919,FBgn0033375,FBgn0033485,FBgn0033661,FBgn0033741,FBgn0034401,FBgn0034734,FBgn0036254,FBgn0036514,FBgn0036686,FBgn0037137,FBgn0037810,FBg…	preribosome	GO:0030684	1.2539e-09	FBgn0003062,FBgn0015393,FBgn0022069,FBgn0026196,FBgn0028744,FBgn0030067,FBgn0031736,FBgn0032408,FBgn0033661,FBgn0034734,FBgn0036254,FBgn0036460,FBgn0036514,FBgn0036686,FBgn0037810,FBgn0038146,FBgn0038964,FBgn0039182	ligase activity, forming carbon-oxygen bonds	GO:0016875	4.71391e-06	FBgn0002069,FBgn0005674,FBgn0027079,FBgn0027080,FBgn0027086,FBgn0027088,FBgn0027091,FBgn0027094,FBgn0031497,FBgn0034401,FBgn0039175,FBgn0086443					Protein processing in endoplasmic reticulum	4141	4.08307e-05	FBgn0001218,FBgn0010638,FBgn0011016,FBgn0011296,FBgn0014002,FBgn0021795,FBgn0023529,FBgn0025678,FBgn0025700,FBgn0028327,FBgn0031049,FBgn0031256,FBgn0033010,FBgn0033691,FBgn0035771,FBgn0035909,FBgn0037718,FBgn0039562,FBgn0040340,FBgn0086357,FBgn0262125,FBgn0262126	single-organism metabolic process	GO:0044710	1.11492e-06	FBgn0000261,FBgn0000406,FBgn0000459,FBgn0001112,FBgn0001124,FBgn0002719,FBgn0003067,FBgn0003189,FBgn0003748,FBgn0010053,FBgn0010548,FBgn0010620,FBgn0011754,FBgn0011768,FBgn0013771,FBgn0015040,FBgn0016013,FBgn0020236,FBgn0022359,FBgn0022768,FBgn0025454,FBgn0025595,FBgn0026428,FBgn0027348,FBgn0027550,FBgn0027611,FBgn0027843,FBgn0028519,FBgn0030589,FBgn0030828,FBgn0030968,FBgn0031182,FBgn0031381,FBg…	extracellular space	GO:0005615	0.000397008	FBgn0002565,FBgn0004629,FBgn0013763,FBgn0022355,FBgn0026061,FBgn0027586,FBgn0030828,FBgn0031381,FBgn0032494,FBgn0033268,FBgn0033799,FBgn0034162,FBgn0034229,FBgn0034468,FBgn0034474,FBgn0034509,FBgn0036619,FBgn0038198,FBgn0039483,FBgn0039678,FBgn0039801,FBgn0040653,FBgn0041180,FBgn0085256,FBgn0250848,FBgn0260745	catalytic activity	GO:0003824	2.01588e-06	FBgn0000116,FBgn0000206,FBgn0000261,FBgn0000406,FBgn0001112,FBgn0001124,FBgn0001942,FBgn0002719,FBgn0003067,FBgn0003189,FBgn0003748,FBgn0004629,FBgn0010053,FBgn0010548,FBgn0010620,FBgn0011754,FBgn0011768,FBgn0013763,FBgn0013771,FBgn0015040,FBgn0016013,FBgn0017581,FBgn0020236,FBgn0020304,FBgn0022359,FBgn0022768,FBgn0025454,FBgn0025680,FBgn0025814,FBgn0025827,FBgn0026061,FBgn0026428,FBgn0027348,FBg…	Cytochrome P450, E-class, group I	IPR002401	2.53239e-06	FBgn0013771,FBgn0015040,FBgn0025454,FBgn0031182,FBgn0031432,FBgn0031689,FBgn0033978,FBgn0033981,FBgn0036910,FBgn0038037,FBgn0038680,FBgn0041337,FBgn0050489,FBgn0053503	Phase I - Functionalization of compounds	R-DME-211945	6.6644e-06	FBgn0010053,FBgn0010548,FBgn0011768,FBgn0013771,FBgn0015040,FBgn0025454,FBgn0031182,FBgn0033978,FBgn0033981,FBgn0034405,FBgn0036211,FBgn0038037
small molecule metabolic process	GO:0044281	3.61915e-09	FBgn0000052,FBgn0000053,FBgn0000546,FBgn0000566,FBgn0001145,FBgn0001218,FBgn0002069,FBgn0002526,FBgn0003162,FBgn0003360,FBgn0003965,FBgn0004396,FBgn0004852,FBgn0005674,FBgn0010222,FBgn0010591,FBgn0011703,FBgn0011704,FBgn0013672,FBgn0013678,FBgn0013683,FBgn0013684,FBgn0014455,FBgn0020251,FBgn0020306,FBgn0020513,FBgn0022160,FBgn0023129,FBgn0023215,FBgn0023535,FBgn0027079,FBgn0027080,FBgn0027086,FBg…	nucleolar part	GO:0044452	1.63311e-08	FBgn0003062,FBgn0003278,FBgn0011824,FBgn0015393,FBgn0019938,FBgn0026196,FBgn0028744,FBgn0031736,FBgn0034734,FBgn0036254,FBgn0036514,FBgn0036686,FBgn0038146,FBgn0038473,FBgn0038964,FBgn0039182,FBgn0259937	ligase activity, forming aminoacyl-tRNA and related compounds	GO:0016876	4.71391e-06	FBgn0002069,FBgn0005674,FBgn0027079,FBgn0027080,FBgn0027086,FBgn0027088,FBgn0027091,FBgn0027094,FBgn0031497,FBgn0034401,FBgn0039175,FBgn0086443					Aminoacyl-tRNA biosynthesis	970	6.69171e-05	FBgn0002069,FBgn0005674,FBgn0027079,FBgn0027080,FBgn0027086,FBgn0027088,FBgn0027091,FBgn0027094,FBgn0031497,FBgn0034401,FBgn0039175,FBgn0086443	cholesterol transport	GO:0030301	0.00404933	FBgn0031381,FBgn0031449,FBgn0031515,FBgn0038198,FBgn0039800,FBgn0039801	extracellular region part	GO:0044421	0.000680696	FBgn0002565,FBgn0003390,FBgn0004629,FBgn0013763,FBgn0022355,FBgn0026061,FBgn0027586,FBgn0030398,FBgn0030828,FBgn0031381,FBgn0032494,FBgn0033268,FBgn0033799,FBgn0034162,FBgn0034229,FBgn0034468,FBgn0034474,FBgn0034509,FBgn0036619,FBgn0036880,FBgn0038198,FBgn0039483,FBgn0039678,FBgn0039801,FBgn0040653,FBgn0041180,FBgn0042119,FBgn0050163,FBgn0085256,FBgn0250848,FBgn0260745	tetrapyrrole binding	GO:0046906	6.83457e-06	FBgn0000261,FBgn0000406,FBgn0013771,FBgn0015040,FBgn0025454,FBgn0031182,FBgn0031432,FBgn0031689,FBgn0033978,FBgn0033981,FBgn0036910,FBgn0038037,FBgn0038680,FBgn0041337,FBgn0050489,FBgn0053503	Cytochrome P450	IPR001128	4.54661e-06	FBgn0013771,FBgn0015040,FBgn0025454,FBgn0031182,FBgn0031432,FBgn0031689,FBgn0033978,FBgn0033981,FBgn0036910,FBgn0038037,FBgn0038680,FBgn0041337,FBgn0050489,FBgn0053503	Fatty acid metabolism	R-DME-8978868	6.79797e-06	FBgn0010548,FBgn0013771,FBgn0015040,FBgn0020236,FBgn0025454,FBgn0025814,FBgn0027348,FBgn0028519,FBgn0031182,FBgn0032775,FBgn0033717,FBgn0033978,FBgn0033981,FBgn0038037,FBgn0061356,FBgn0086687,FBgn0261862
ribosome biogenesis	GO:0042254	8.48536e-09	FBgn0003062,FBgn0011824,FBgn0015393,FBgn0020255,FBgn0020909,FBgn0021995,FBgn0022069,FBgn0026196,FBgn0028744,FBgn0030067,FBgn0030720,FBgn0031736,FBgn0032408,FBgn0032919,FBgn0033379,FBgn0033485,FBgn0033661,FBgn0033741,FBgn0034734,FBgn0036254,FBgn0036460,FBgn0036514,FBgn0036686,FBgn0037137,FBgn0037810,FBgn0038146,FBgn0038473,FBgn0038964,FBgn0259937	t-UTP complex	GO:0034455	1.11326e-05	FBgn0003062,FBgn0015393,FBgn0026196,FBgn0031736,FBgn0034734,FBgn0036254,FBgn0036514,FBgn0036686,FBgn0038146,FBgn0038964,FBgn0039182	ligase activity	GO:0016874	0.00217776	FBgn0000052,FBgn0000053,FBgn0000546,FBgn0001145,FBgn0002069,FBgn0005674,FBgn0020513,FBgn0027079,FBgn0027080,FBgn0027086,FBgn0027088,FBgn0027091,FBgn0027094,FBgn0030305,FBgn0031497,FBgn0034401,FBgn0034629,FBgn0035049,FBgn0035091,FBgn0036974,FBgn0039175,FBgn0086443,FBgn0270926					XBP1(S) activates chaperone genes	R-DME-381038	0.000301525	FBgn0010638,FBgn0031049,FBgn0033691,FBgn0035771,FBgn0047135,FBgn0086357	sterol transport	GO:0015918	0.00565798	FBgn0031381,FBgn0031449,FBgn0031515,FBgn0038198,FBgn0039800,FBgn0039801	vacuole	GO:0005773	0.0314574	FBgn0028343,FBgn0029093,FBgn0033717,FBgn0034229,FBgn0035227,FBgn0035290,FBgn0036211,FBgn0036623,FBgn0037074,FBgn0037917,FBgn0039678,FBgn0040259,FBgn0051414,FBgn0053523,FBgn0250848,FBgn0261862	heme binding	GO:0020037	8.16715e-06	FBgn0000261,FBgn0000406,FBgn0013771,FBgn0015040,FBgn0025454,FBgn0031182,FBgn0031432,FBgn0031689,FBgn0033978,FBgn0033981,FBgn0036910,FBgn0038037,FBgn0038680,FBgn0041337,FBgn0050489,FBgn0053503	ML domain, Npc2 like	IPR033916	0.0100722	FBgn0031381,FBgn0038198,FBgn0039800,FBgn0039801	Biological oxidations	R-DME-211859	1.07507e-05	FBgn0010053,FBgn0010548,FBgn0011768,FBgn0013771,FBgn0015040,FBgn0025454,FBgn0025814,FBgn0030484,FBgn0031182,FBgn0033978,FBgn0033981,FBgn0034405,FBgn0036211,FBgn0037697,FBgn0038037
protein localization to endoplasmic reticulum	GO:0070972	1.60743e-08	FBgn0010391,FBgn0010638,FBgn0011016,FBgn0011509,FBgn0021795,FBgn0025700,FBgn0030306,FBgn0035771,FBgn0035947,FBgn0036300,FBgn0038808,FBgn0038810	vacuole	GO:0005773	1.81879e-05	FBgn0001218,FBgn0010391,FBgn0010470,FBgn0010638,FBgn0011016,FBgn0011509,FBgn0014002,FBgn0019925,FBgn0021795,FBgn0023529,FBgn0025678,FBgn0028327,FBgn0030306,FBgn0031260,FBgn0035909,FBgn0037010,FBgn0037396,FBgn0037718,FBgn0037930,FBgn0038535,FBgn0039562,FBgn0039900,FBgn0045866,FBgn0053113,FBgn0053129,FBgn0069242,FBgn0086357,FBgn0262801,FBgn0263260,FBgn0264294,FBgn0266369,FBgn0267348	tRNA binding	GO:0000049	0.0176711	FBgn0026079,FBgn0027080,FBgn0027086,FBgn0027091,FBgn0027094,FBgn0033375					Unfolded Protein Response (UPR)	R-DME-381119	0.000439891	FBgn0010638,FBgn0031049,FBgn0033010,FBgn0033691,FBgn0035771,FBgn0047135,FBgn0086357	intracellular sterol transport	GO:0032366	0.00718209	FBgn0031381,FBgn0038198,FBgn0039800,FBgn0039801					iron ion binding	GO:0005506	0.000173782	FBgn0013771,FBgn0015040,FBgn0025454,FBgn0031182,FBgn0031432,FBgn0031689,FBgn0033978,FBgn0033981,FBgn0036910,FBgn0038037,FBgn0038349,FBgn0038680,FBgn0041337,FBgn0050489,FBgn0053503	MD-2-related lipid-recognition domain	IPR003172	0.0158604	FBgn0031381,FBgn0038198,FBgn0039800,FBgn0039801	Tyrosine metabolism	350	3.06905e-05	FBgn0001124,FBgn0010548,FBgn0011768,FBgn0016013,FBgn0036992,FBgn0037697,FBgn0040211
organic acid metabolic process	GO:0006082	2.25543e-08	FBgn0000566,FBgn0001145,FBgn0002069,FBgn0003162,FBgn0003965,FBgn0005674,FBgn0010222,FBgn0010591,FBgn0014455,FBgn0020251,FBgn0023129,FBgn0023535,FBgn0027079,FBgn0027080,FBgn0027086,FBgn0027088,FBgn0027091,FBgn0027094,FBgn0029823,FBgn0030482,FBgn0031497,FBgn0031824,FBgn0032287,FBgn0034390,FBgn0034401,FBgn0034629,FBgn0035911,FBgn0036975,FBgn0037801,FBgn0037819,FBgn0038074,FBgn0038524,FBgn0038662,FBg…	small-subunit processome	GO:0032040	0.000138188	FBgn0003062,FBgn0015393,FBgn0026196,FBgn0031736,FBgn0034734,FBgn0036514,FBgn0038146,FBgn0038964,FBgn0039182	small molecule binding	GO:0036094	0.0347286	FBgn0000053,FBgn0000546,FBgn0000566,FBgn0002069,FBgn0002638,FBgn0003278,FBgn0003676,FBgn0005278,FBgn0005674,FBgn0010348,FBgn0010391,FBgn0010591,FBgn0010621,FBgn0010638,FBgn0011703,FBgn0014455,FBgn0020255,FBgn0020306,FBgn0020389,FBgn0020443,FBgn0020633,FBgn0021995,FBgn0026259,FBgn0027079,FBgn0027080,FBgn0027086,FBgn0027088,FBgn0027091,FBgn0027094,FBgn0029823,FBgn0030151,FBgn0030321,FBgn0031069,FBg…					IRE1alpha activates chaperones	R-DME-381070	0.00048233	FBgn0010638,FBgn0031049,FBgn0033691,FBgn0035771,FBgn0047135,FBgn0086357	intracellular cholesterol transport	GO:0032367	0.00718209	FBgn0031381,FBgn0038198,FBgn0039800,FBgn0039801					oxidoreductase activity, acting on paired donors, with incorporation or reduction of molecular oxygen	GO:0016705	0.000204219	FBgn0013771,FBgn0015040,FBgn0025454,FBgn0031182,FBgn0031432,FBgn0031689,FBgn0033978,FBgn0033981,FBgn0036910,FBgn0038037,FBgn0038680,FBgn0041337,FBgn0050489,FBgn0053503,FBgn0086687					Synthesis of Prostaglandins (PG) and Thromboxanes (TX)	R-DME-2162123	3.94301e-05	FBgn0013771,FBgn0015040,FBgn0025454,FBgn0025814,FBgn0031182,FBgn0033978,FBgn0033981,FBgn0038037
oxoacid metabolic process	GO:0043436	2.25543e-08	FBgn0000566,FBgn0001145,FBgn0002069,FBgn0003162,FBgn0003965,FBgn0005674,FBgn0010222,FBgn0010591,FBgn0014455,FBgn0020251,FBgn0023129,FBgn0023535,FBgn0027079,FBgn0027080,FBgn0027086,FBgn0027088,FBgn0027091,FBgn0027094,FBgn0029823,FBgn0030482,FBgn0031497,FBgn0031824,FBgn0032287,FBgn0034390,FBgn0034401,FBgn0034629,FBgn0035911,FBgn0036975,FBgn0037801,FBgn0037819,FBgn0038074,FBgn0038524,FBgn0038662,FBg…	preribosome, large subunit precursor	GO:0030687	0.000604334	FBgn0022069,FBgn0028744,FBgn0030067,FBgn0032408,FBgn0033661,FBgn0036460,FBgn0037810	carboxy-lyase activity	GO:0016831	0.0391859	FBgn0010591,FBgn0019932,FBgn0020513,FBgn0026576,FBgn0034356,FBgn0036975					Purine ribonucleoside monophosphate biosynthesis	R-DME-73817	0.00048233	FBgn0000052,FBgn0000053,FBgn0020513,FBgn0038467,FBgn0039241,FBgn0041194	carboxylic acid metabolic process	GO:0019752	0.00958312	FBgn0001124,FBgn0002719,FBgn0003189,FBgn0016013,FBgn0020236,FBgn0026428,FBgn0027348,FBgn0028519,FBgn0032076,FBgn0032775,FBgn0036992,FBgn0037643,FBgn0037697,FBgn0038105,FBgn0038516,FBgn0040211,FBgn0040349,FBgn0051075,FBgn0086355,FBgn0086687					hydrolase activity, hydrolyzing O-glycosyl compounds	GO:0004553	0.000359271	FBgn0003748,FBgn0013763,FBgn0025827,FBgn0027611,FBgn0034117,FBgn0034162,FBgn0041630,FBgn0051414,FBgn0053080,FBgn0261575					Eicosanoids	R-DME-211979	9.88581e-05	FBgn0013771,FBgn0015040,FBgn0025454,FBgn0031182,FBgn0033978,FBgn0033981,FBgn0038037
carboxylic acid metabolic process	GO:0019752	3.76408e-08	FBgn0000566,FBgn0001145,FBgn0002069,FBgn0003162,FBgn0003965,FBgn0005674,FBgn0010222,FBgn0010591,FBgn0014455,FBgn0023129,FBgn0023535,FBgn0027079,FBgn0027080,FBgn0027086,FBgn0027088,FBgn0027091,FBgn0027094,FBgn0029823,FBgn0030482,FBgn0031497,FBgn0031824,FBgn0032287,FBgn0034390,FBgn0034401,FBgn0034629,FBgn0035911,FBgn0036975,FBgn0037801,FBgn0037819,FBgn0038074,FBgn0038662,FBgn0039094,FBgn0039175,FBg…	intracellular membrane-bounded organelle	GO:0043231	0.000688965	FBgn0000546,FBgn0000964,FBgn0001218,FBgn0001234,FBgn0002031,FBgn0002638,FBgn0002780,FBgn0003062,FBgn0003278,FBgn0003360,FBgn0003435,FBgn0004396,FBgn0004595,FBgn0004606,FBgn0004638,FBgn0004652,FBgn0005391,FBgn0005648,FBgn0005655,FBgn0010222,FBgn0010292,FBgn0010348,FBgn0010391,FBgn0010470,FBgn0010638,FBgn0011016,FBgn0011224,FBgn0011509,FBgn0011638,FBgn0011666,FBgn0011824,FBgn0013269,FBgn0013672,FBg…	signal recognition particle binding	GO:0005047	0.0471333	FBgn0010391,FBgn0011509,FBgn0035947					Ribosome biogenesis in eukaryotes	3008	0.000559592	FBgn0003062,FBgn0011824,FBgn0015393,FBgn0020255,FBgn0020909,FBgn0026196,FBgn0033661,FBgn0036187,FBgn0036514,FBgn0036686,FBgn0038146,FBgn0038473,FBgn0038964,FBgn0050349,FBgn0259937,FBgn0263605	small molecule metabolic process	GO:0044281	0.00983406	FBgn0000459,FBgn0001112,FBgn0001124,FBgn0002719,FBgn0003067,FBgn0003189,FBgn0010620,FBgn0011754,FBgn0011768,FBgn0016013,FBgn0020236,FBgn0026428,FBgn0027348,FBgn0027550,FBgn0027611,FBgn0027843,FBgn0028519,FBgn0030589,FBgn0031381,FBgn0032076,FBgn0032775,FBgn0036428,FBgn0036992,FBgn0037612,FBgn0037643,FBgn0037697,FBgn0037788,FBgn0038105,FBgn0038198,FBgn0038349,FBgn0038516,FBgn0040211,FBgn0040349,FBg…					hydrolase activity, acting on glycosyl bonds	GO:0016798	0.00128537	FBgn0003748,FBgn0013763,FBgn0025827,FBgn0027611,FBgn0034117,FBgn0034162,FBgn0041630,FBgn0051414,FBgn0053080,FBgn0261575					Arachidonic acid metabolism	R-DME-2142753	0.000174239	FBgn0013771,FBgn0015040,FBgn0025454,FBgn0025814,FBgn0031182,FBgn0033717,FBgn0033978,FBgn0033981,FBgn0038037
protein targeting to ER	GO:0045047	4.12929e-08	FBgn0010391,FBgn0010638,FBgn0011509,FBgn0025700,FBgn0030306,FBgn0035771,FBgn0035947,FBgn0036300,FBgn0038808,FBgn0038810	signal recognition particle, endoplasmic reticulum targeting	GO:0005786	0.000712752	FBgn0011016,FBgn0021795,FBgn0035947,FBgn0038808,FBgn0038810									Nucleobase biosynthesis	R-DME-8956320	0.00209116	FBgn0000052,FBgn0000053,FBgn0020513,FBgn0038467,FBgn0039241,FBgn0041194	intracellular lipid transport	GO:0032365	0.0101028	FBgn0031381,FBgn0038198,FBgn0039800,FBgn0039801					sterol binding	GO:0032934	0.0411551	FBgn0031381,FBgn0038198,FBgn0039800,FBgn0039801					Metabolism of lipids	R-DME-556833	0.00374754	FBgn0010548,FBgn0013771,FBgn0015040,FBgn0020236,FBgn0025454,FBgn0025814,FBgn0027348,FBgn0028519,FBgn0030828,FBgn0031182,FBgn0032775,FBgn0033717,FBgn0033978,FBgn0033981,FBgn0034117,FBgn0036623,FBgn0037913,FBgn0038037,FBgn0041630,FBgn0051414,FBgn0061356,FBgn0086687,FBgn0261862
rRNA processing	GO:0006364	4.34919e-08	FBgn0003062,FBgn0011824,FBgn0015393,FBgn0022069,FBgn0026196,FBgn0028744,FBgn0030067,FBgn0030720,FBgn0031736,FBgn0032408,FBgn0032919,FBgn0033485,FBgn0033661,FBgn0033741,FBgn0034734,FBgn0036254,FBgn0036514,FBgn0036686,FBgn0037137,FBgn0037810,FBgn0038146,FBgn0038964,FBgn0259937	signal recognition particle	GO:0048500	0.000712752	FBgn0011016,FBgn0021795,FBgn0035947,FBgn0038808,FBgn0038810									Glycine, serine and threonine metabolism	260	0.00209749	FBgn0000566,FBgn0023129,FBgn0029823,FBgn0032287,FBgn0036857,FBgn0037801,FBgn0038074,FBgn0039094	organic hydroxy compound transport	GO:0015850	0.012851	FBgn0031381,FBgn0031449,FBgn0031515,FBgn0038198,FBgn0039800,FBgn0039801					steroid binding	GO:0005496	0.049714	FBgn0031381,FBgn0038198,FBgn0039800,FBgn0039801					Cytochrome P450 - arranged by substrate type	R-DME-211897	0.00622634	FBgn0013771,FBgn0015040,FBgn0025454,FBgn0031182,FBgn0033978,FBgn0033981,FBgn0038037
protein targeting to membrane	GO:0006612	4.38114e-08	FBgn0010391,FBgn0010638,FBgn0011016,FBgn0011509,FBgn0025700,FBgn0028327,FBgn0035771,FBgn0035947,FBgn0038808,FBgn0038810,FBgn0262125,FBgn0262126	rough endoplasmic reticulum	GO:0005791	0.000924317	FBgn0010391,FBgn0010638,FBgn0011509,FBgn0014002,FBgn0086357									Metabolism of amino acids and derivatives	R-DME-71291	0.00851134	FBgn0000566,FBgn0001145,FBgn0003965,FBgn0005278,FBgn0014455,FBgn0019932,FBgn0023129,FBgn0023535,FBgn0025687,FBgn0029823,FBgn0030482,FBgn0031824,FBgn0033830,FBgn0034215,FBgn0034390,FBgn0035911,FBgn0036749,FBgn0036857,FBgn0037801,FBgn0038074,FBgn0039827,FBgn0039849,FBgn0053092	sleep	GO:0030431	0.0142405	FBgn0002719,FBgn0017581,FBgn0025454,FBgn0025680,FBgn0027348,FBgn0028519,FBgn0032785,FBgn0036022,FBgn0037090,FBgn0038733,FBgn0039135,FBgn0040732													Phenylalanine and tyrosine catabolism	R-DME-71182	0.00959324	FBgn0016013,FBgn0036992,FBgn0037697,FBgn0040211
cotranslational protein targeting to membrane	GO:0006613	5.27327e-08	FBgn0010391,FBgn0010638,FBgn0011016,FBgn0011509,FBgn0025700,FBgn0028327,FBgn0035947,FBgn0038808,FBgn0038810	aminoacyl-tRNA synthetase multienzyme complex	GO:0017101	0.000924317	FBgn0002069,FBgn0005674,FBgn0027080,FBgn0027086,FBgn0034401									Cysteine and methionine metabolism	270	0.0087396	FBgn0000566,FBgn0005278,FBgn0014455,FBgn0019932,FBgn0032726,FBgn0034215,FBgn0039849	aromatic amino acid family metabolic process	GO:0009072	0.0147533	FBgn0016013,FBgn0036992,FBgn0037697,FBgn0038105,FBgn0040211													Metabolism of xenobiotics by cytochrome P450	980	0.032674	FBgn0010548,FBgn0011768,FBgn0025814,FBgn0030484,FBgn0031418,FBgn0037697,FBgn0040260
establishment of protein localization to endoplasmic reticulum	GO:0072599	6.50713e-08	FBgn0010391,FBgn0010638,FBgn0011509,FBgn0025700,FBgn0030306,FBgn0035771,FBgn0035947,FBgn0036300,FBgn0038808,FBgn0038810	membrane-bounded organelle	GO:0043227	0.000975578	FBgn0000546,FBgn0000964,FBgn0001218,FBgn0001234,FBgn0002031,FBgn0002638,FBgn0002780,FBgn0003062,FBgn0003278,FBgn0003360,FBgn0003435,FBgn0004396,FBgn0004595,FBgn0004606,FBgn0004638,FBgn0004652,FBgn0005391,FBgn0005648,FBgn0005655,FBgn0010222,FBgn0010292,FBgn0010348,FBgn0010391,FBgn0010470,FBgn0010638,FBgn0011016,FBgn0011224,FBgn0011509,FBgn0011638,FBgn0011666,FBgn0011824,FBgn0013269,FBgn0013672,FBg…									VLDL assembly	R-DME-8866423	0.00896062	FBgn0014002,FBgn0087002,FBgn0266369	organic acid metabolic process	GO:0006082	0.0172473	FBgn0001124,FBgn0002719,FBgn0003189,FBgn0016013,FBgn0020236,FBgn0026428,FBgn0027348,FBgn0028519,FBgn0032076,FBgn0032775,FBgn0036992,FBgn0037643,FBgn0037697,FBgn0038105,FBgn0038516,FBgn0040211,FBgn0040349,FBgn0051075,FBgn0086355,FBgn0086687
rRNA metabolic process	GO:0016072	1.8236e-07	FBgn0003062,FBgn0011824,FBgn0015393,FBgn0022069,FBgn0026196,FBgn0028744,FBgn0030067,FBgn0030720,FBgn0031736,FBgn0032408,FBgn0032919,FBgn0033485,FBgn0033661,FBgn0033741,FBgn0034734,FBgn0036254,FBgn0036514,FBgn0036686,FBgn0037137,FBgn0037810,FBgn0038146,FBgn0038964,FBgn0259937	endoplasmic reticulum	GO:0005783	0.000984314	FBgn0001218,FBgn0010391,FBgn0010470,FBgn0010638,FBgn0011016,FBgn0011509,FBgn0014002,FBgn0020251,FBgn0021795,FBgn0025678,FBgn0028327,FBgn0030306,FBgn0031260,FBgn0035947,FBgn0036147,FBgn0036919,FBgn0037728,FBgn0038524,FBgn0038535,FBgn0039450,FBgn0047135,FBgn0053113,FBgn0086357,FBgn0243512,FBgn0250820,FBgn0262125,FBgn0262126,FBgn0262801,FBgn0263260									Chylomicron assembly	R-DME-8963888	0.00896062	FBgn0014002,FBgn0087002,FBgn0266369	oxoacid metabolic process	GO:0043436	0.0172473	FBgn0001124,FBgn0002719,FBgn0003189,FBgn0016013,FBgn0020236,FBgn0026428,FBgn0027348,FBgn0028519,FBgn0032076,FBgn0032775,FBgn0036992,FBgn0037643,FBgn0037697,FBgn0038105,FBgn0038516,FBgn0040211,FBgn0040349,FBgn0051075,FBgn0086355,FBgn0086687
ribonucleoprotein complex biogenesis	GO:0022613	5.54441e-07	FBgn0003062,FBgn0004926,FBgn0011824,FBgn0015393,FBgn0020255,FBgn0020909,FBgn0021995,FBgn0022069,FBgn0026196,FBgn0028744,FBgn0030067,FBgn0030720,FBgn0031736,FBgn0032408,FBgn0032919,FBgn0033379,FBgn0033485,FBgn0033661,FBgn0033741,FBgn0034734,FBgn0036254,FBgn0036460,FBgn0036514,FBgn0036686,FBgn0037137,FBgn0037810,FBgn0038146,FBgn0038473,FBgn0038964,FBgn0259937,FBgn0263740	intracellular part	GO:0044424	0.0010311	FBgn0000052,FBgn0000053,FBgn0000546,FBgn0000566,FBgn0000964,FBgn0001145,FBgn0001218,FBgn0001234,FBgn0002031,FBgn0002069,FBgn0002638,FBgn0002780,FBgn0003062,FBgn0003162,FBgn0003278,FBgn0003360,FBgn0003435,FBgn0003676,FBgn0004047,FBgn0004396,FBgn0004595,FBgn0004606,FBgn0004638,FBgn0004652,FBgn0004852,FBgn0004926,FBgn0005278,FBgn0005391,FBgn0005648,FBgn0005655,FBgn0005674,FBgn0010222,FBgn0010292,FBg…									Plasma lipoprotein assembly	R-DME-8963898	0.00896062	FBgn0014002,FBgn0087002,FBgn0266369	response to DDT	GO:0046680	0.0360602	FBgn0025454,FBgn0050489,FBgn0053503
tRNA aminoacylation for protein translation	GO:0006418	1.90068e-06	FBgn0002069,FBgn0005674,FBgn0027079,FBgn0027080,FBgn0027086,FBgn0027088,FBgn0027091,FBgn0027094,FBgn0031497,FBgn0034401,FBgn0039175,FBgn0086443	small nucleolar ribonucleoprotein complex	GO:0005732	0.00107704	FBgn0003062,FBgn0011824,FBgn0015393,FBgn0026196,FBgn0038964,FBgn0259937									Major pathway of rRNA processing in the nucleolus and cytosol	R-DME-6791226	0.0093265	FBgn0010292,FBgn0015393,FBgn0020909,FBgn0026196,FBgn0028744,FBgn0032919,FBgn0034734,FBgn0036187,FBgn0036514,FBgn0036686,FBgn0038146,FBgn0038473,FBgn0038964,FBgn0039182,FBgn0050349,FBgn0263605
tRNA aminoacylation	GO:0043039	1.90068e-06	FBgn0002069,FBgn0005674,FBgn0027079,FBgn0027080,FBgn0027086,FBgn0027088,FBgn0027091,FBgn0027094,FBgn0031497,FBgn0034401,FBgn0039175,FBgn0086443	box C/D snoRNP complex	GO:0031428	0.00127952	FBgn0003062,FBgn0015393,FBgn0026196,FBgn0038964									rRNA processing	R-DME-72312	0.0093265	FBgn0010292,FBgn0015393,FBgn0020909,FBgn0026196,FBgn0028744,FBgn0032919,FBgn0034734,FBgn0036187,FBgn0036514,FBgn0036686,FBgn0038146,FBgn0038473,FBgn0038964,FBgn0039182,FBgn0050349,FBgn0263605
amino acid activation	GO:0043038	2.31731e-06	FBgn0002069,FBgn0005674,FBgn0027079,FBgn0027080,FBgn0027086,FBgn0027088,FBgn0027091,FBgn0027094,FBgn0031497,FBgn0034401,FBgn0039175,FBgn0086443	cytoplasmic part	GO:0044444	0.00137491	FBgn0000053,FBgn0001218,FBgn0002031,FBgn0003360,FBgn0003676,FBgn0004047,FBgn0004595,FBgn0004852,FBgn0004926,FBgn0005278,FBgn0010222,FBgn0010348,FBgn0010391,FBgn0010470,FBgn0010621,FBgn0010638,FBgn0011016,FBgn0011224,FBgn0011296,FBgn0011509,FBgn0013672,FBgn0013678,FBgn0013679,FBgn0013683,FBgn0013686,FBgn0014002,FBgn0014141,FBgn0014455,FBgn0016041,FBgn0019925,FBgn0019932,FBgn0020251,FBgn0020255,FBg…									rRNA processing in the nucleus and cytosol	R-DME-8868773	0.0093265	FBgn0010292,FBgn0015393,FBgn0020909,FBgn0026196,FBgn0028744,FBgn0032919,FBgn0034734,FBgn0036187,FBgn0036514,FBgn0036686,FBgn0038146,FBgn0038473,FBgn0038964,FBgn0039182,FBgn0050349,FBgn0263605
protein targeting	GO:0006605	3.03522e-06	FBgn0010391,FBgn0010638,FBgn0011016,FBgn0011509,FBgn0016041,FBgn0025700,FBgn0027359,FBgn0028327,FBgn0030306,FBgn0031049,FBgn0033691,FBgn0033918,FBgn0035771,FBgn0035947,FBgn0036300,FBgn0038808,FBgn0038810,FBgn0262125,FBgn0262126	endomembrane system	GO:0012505	0.00366778	FBgn0001218,FBgn0010348,FBgn0010391,FBgn0010470,FBgn0010638,FBgn0011016,FBgn0011509,FBgn0014002,FBgn0019925,FBgn0020251,FBgn0020655,FBgn0021795,FBgn0023529,FBgn0025678,FBgn0025724,FBgn0025726,FBgn0028327,FBgn0030306,FBgn0031260,FBgn0035909,FBgn0035947,FBgn0036147,FBgn0036919,FBgn0037010,FBgn0037718,FBgn0037728,FBgn0037930,FBgn0038524,FBgn0038535,FBgn0038609,FBgn0039450,FBgn0039562,FBgn0039900,FBg…									One carbon pool by folate	670	0.00961361	FBgn0000053,FBgn0010222,FBgn0029823,FBgn0032287,FBgn0039241
ncRNA processing	GO:0034470	3.98081e-06	FBgn0003062,FBgn0011824,FBgn0015393,FBgn0022069,FBgn0026079,FBgn0026196,FBgn0027094,FBgn0028744,FBgn0030067,FBgn0030720,FBgn0031227,FBgn0031736,FBgn0032408,FBgn0032919,FBgn0033375,FBgn0033485,FBgn0033661,FBgn0033741,FBgn0034734,FBgn0036254,FBgn0036514,FBgn0036686,FBgn0037137,FBgn0037810,FBgn0038146,FBgn0038964,FBgn0259937	rough endoplasmic reticulum membrane	GO:0030867	0.00899533	FBgn0010391,FBgn0010638,FBgn0011509									Purine metabolism	230	0.021502	FBgn0000052,FBgn0000053,FBgn0003278,FBgn0004852,FBgn0011703,FBgn0011704,FBgn0019938,FBgn0020389,FBgn0020513,FBgn0035348,FBgn0036030,FBgn0036337,FBgn0038467,FBgn0039241,FBgn0041194,FBgn0051793
cellular response to starvation	GO:0009267	5.95467e-06	FBgn0003062,FBgn0011824,FBgn0020255,FBgn0020909,FBgn0026196,FBgn0033661,FBgn0035538,FBgn0036187,FBgn0036514,FBgn0036686,FBgn0038074,FBgn0038146,FBgn0038473,FBgn0038964,FBgn0050349,FBgn0052350,FBgn0259937,FBgn0263605	cytoplasm	GO:0005737	0.0139854	FBgn0000052,FBgn0000053,FBgn0000546,FBgn0000566,FBgn0001145,FBgn0001218,FBgn0002031,FBgn0002069,FBgn0002780,FBgn0003162,FBgn0003360,FBgn0003676,FBgn0004047,FBgn0004595,FBgn0004638,FBgn0004852,FBgn0004926,FBgn0005278,FBgn0005648,FBgn0005674,FBgn0010222,FBgn0010348,FBgn0010391,FBgn0010470,FBgn0010621,FBgn0010638,FBgn0011016,FBgn0011224,FBgn0011296,FBgn0011509,FBgn0013672,FBgn0013678,FBgn0013679,FBg…									Metabolic pathways	1100	0.0221048	FBgn0000052,FBgn0000053,FBgn0000566,FBgn0001145,FBgn0003162,FBgn0003278,FBgn0003965,FBgn0005278,FBgn0005674,FBgn0010222,FBgn0010591,FBgn0010611,FBgn0011703,FBgn0011704,FBgn0014455,FBgn0019932,FBgn0019938,FBgn0020251,FBgn0020389,FBgn0020513,FBgn0023129,FBgn0023535,FBgn0024957,FBgn0025687,FBgn0026576,FBgn0029823,FBgn0030041,FBgn0030482,FBgn0031824,FBgn0031948,FBgn0032287,FBgn0032382,FBgn0032482,FBg…
single-organism metabolic process	GO:0044710	7.98006e-06	FBgn0000052,FBgn0000053,FBgn0000546,FBgn0000566,FBgn0001145,FBgn0001218,FBgn0001234,FBgn0002069,FBgn0002526,FBgn0003162,FBgn0003360,FBgn0003965,FBgn0004396,FBgn0004638,FBgn0004852,FBgn0005648,FBgn0005655,FBgn0005674,FBgn0010222,FBgn0010591,FBgn0010611,FBgn0011703,FBgn0011704,FBgn0013672,FBgn0013678,FBgn0013679,FBgn0013683,FBgn0013684,FBgn0014002,FBgn0014455,FBgn0015037,FBgn0016694,FBgn0020251,FBg…	intracellular ribonucleoprotein complex	GO:0030529	0.0177875	FBgn0003062,FBgn0004047,FBgn0004926,FBgn0005648,FBgn0011016,FBgn0011224,FBgn0011638,FBgn0011824,FBgn0013686,FBgn0015393,FBgn0021795,FBgn0022069,FBgn0024183,FBgn0026196,FBgn0027835,FBgn0028744,FBgn0030067,FBgn0030786,FBgn0031736,FBgn0032408,FBgn0033485,FBgn0033661,FBgn0034734,FBgn0035121,FBgn0035162,FBgn0035947,FBgn0036254,FBgn0036460,FBgn0036514,FBgn0036686,FBgn0037810,FBgn0038146,FBgn0038535,FBg…
cellular response to nutrient levels	GO:0031669	8.47784e-06	FBgn0003062,FBgn0011824,FBgn0020255,FBgn0020909,FBgn0026196,FBgn0033661,FBgn0035538,FBgn0036187,FBgn0036514,FBgn0036686,FBgn0038074,FBgn0038146,FBgn0038473,FBgn0038964,FBgn0050349,FBgn0052350,FBgn0259937,FBgn0263605	ribonucleoprotein complex	GO:1990904	0.0177875	FBgn0003062,FBgn0004047,FBgn0004926,FBgn0005648,FBgn0011016,FBgn0011224,FBgn0011638,FBgn0011824,FBgn0013686,FBgn0015393,FBgn0021795,FBgn0022069,FBgn0024183,FBgn0026196,FBgn0027835,FBgn0028744,FBgn0030067,FBgn0030786,FBgn0031736,FBgn0032408,FBgn0033485,FBgn0033661,FBgn0034734,FBgn0035121,FBgn0035162,FBgn0035947,FBgn0036254,FBgn0036460,FBgn0036514,FBgn0036686,FBgn0037810,FBgn0038146,FBgn0038535,FBg…
SRP-dependent cotranslational protein targeting to membrane	GO:0006614	9.69746e-06	FBgn0010391,FBgn0010638,FBgn0011509,FBgn0025700,FBgn0035947,FBgn0038808,FBgn0038810	fusome	GO:0045169	0.0301033	FBgn0014002,FBgn0019925,FBgn0028327,FBgn0035771,FBgn0053113,FBgn0086357
cellular response to extracellular stimulus	GO:0031668	1.03974e-05	FBgn0003062,FBgn0011824,FBgn0020255,FBgn0020909,FBgn0026196,FBgn0033661,FBgn0035538,FBgn0036187,FBgn0036514,FBgn0036686,FBgn0038074,FBgn0038146,FBgn0038473,FBgn0038964,FBgn0050349,FBgn0052350,FBgn0259937,FBgn0263605	basement membrane	GO:0005604	0.0344128	FBgn0002526,FBgn0011722,FBgn0026403,FBgn0267348
alpha-amino acid metabolic process	GO:1901605	1.18633e-05	FBgn0000566,FBgn0001145,FBgn0003965,FBgn0014455,FBgn0023129,FBgn0023535,FBgn0029823,FBgn0030482,FBgn0031824,FBgn0032287,FBgn0035911,FBgn0037801,FBgn0038074,FBgn0039094,FBgn0039849,FBgn0270926	extracellular matrix component	GO:0044420	0.0344128	FBgn0002526,FBgn0011722,FBgn0026403,FBgn0267348
cellular response to external stimulus	GO:0071496	2.19369e-05	FBgn0003062,FBgn0011824,FBgn0020255,FBgn0020909,FBgn0026196,FBgn0033661,FBgn0035538,FBgn0036187,FBgn0036514,FBgn0036686,FBgn0038074,FBgn0038146,FBgn0038473,FBgn0038964,FBgn0050349,FBgn0052350,FBgn0259937,FBgn0263605
serine family amino acid metabolic process	GO:0009069	3.53064e-05	FBgn0000566,FBgn0014455,FBgn0023129,FBgn0029823,FBgn0032287,FBgn0037801,FBgn0038074,FBgn0039094
establishment of protein localization to membrane	GO:0090150	4.21406e-05	FBgn0010391,FBgn0010638,FBgn0011016,FBgn0011509,FBgn0025700,FBgn0028327,FBgn0035771,FBgn0035947,FBgn0038808,FBgn0038810,FBgn0262125,FBgn0262126
alpha-amino acid catabolic process	GO:1901606	0.000128004	FBgn0001145,FBgn0003965,FBgn0014455,FBgn0023535,FBgn0031824,FBgn0032287,FBgn0035911,FBgn0037801,FBgn0039094
cellular amino acid catabolic process	GO:0009063	0.000223302	FBgn0001145,FBgn0003965,FBgn0014455,FBgn0023535,FBgn0031824,FBgn0032287,FBgn0035911,FBgn0037801,FBgn0039094
response to starvation	GO:0042594	0.000311326	FBgn0003062,FBgn0004852,FBgn0011824,FBgn0020255,FBgn0020909,FBgn0026196,FBgn0033661,FBgn0035538,FBgn0036187,FBgn0036514,FBgn0036686,FBgn0038074,FBgn0038146,FBgn0038473,FBgn0038964,FBgn0050349,FBgn0052350,FBgn0259937,FBgn0262656,FBgn0263605
ribosomal large subunit biogenesis	GO:0042273	0.000345	FBgn0015393,FBgn0028744,FBgn0030067,FBgn0032408,FBgn0033379,FBgn0033485,FBgn0033661,FBgn0033741,FBgn0036460,FBgn0037810,FBgn0038473
peptide transport	GO:0015833	0.000345225	FBgn0002638,FBgn0010391,FBgn0010638,FBgn0011016,FBgn0011509,FBgn0016041,FBgn0020255,FBgn0025700,FBgn0025724,FBgn0026252,FBgn0027359,FBgn0028327,FBgn0029939,FBgn0030306,FBgn0031049,FBgn0031461,FBgn0033379,FBgn0033691,FBgn0033918,FBgn0034475,FBgn0035770,FBgn0035771,FBgn0035947,FBgn0036187,FBgn0036300,FBgn0036995,FBgn0038808,FBgn0038810,FBgn0039450,FBgn0069242,FBgn0086357,FBgn0086674,FBgn0243512,FBg…
organic substance transport	GO:0071702	0.00034659	FBgn0002638,FBgn0003360,FBgn0010391,FBgn0010638,FBgn0011016,FBgn0011509,FBgn0016041,FBgn0019952,FBgn0020255,FBgn0025700,FBgn0025724,FBgn0026252,FBgn0027359,FBgn0028327,FBgn0028646,FBgn0029939,FBgn0030306,FBgn0031049,FBgn0031069,FBgn0031461,FBgn0032136,FBgn0032938,FBgn0033379,FBgn0033691,FBgn0033918,FBgn0034475,FBgn0035770,FBgn0035771,FBgn0035947,FBgn0036187,FBgn0036300,FBgn0036995,FBgn0038524,FBg…
alpha-amino acid biosynthetic process	GO:1901607	0.000351243	FBgn0000566,FBgn0001145,FBgn0023129,FBgn0029823,FBgn0030482,FBgn0038074,FBgn0039094,FBgn0039849,FBgn0270926
amide transport	GO:0042886	0.000355343	FBgn0002638,FBgn0010391,FBgn0010638,FBgn0011016,FBgn0011509,FBgn0016041,FBgn0020255,FBgn0025700,FBgn0025724,FBgn0026252,FBgn0027359,FBgn0028327,FBgn0029939,FBgn0030306,FBgn0031049,FBgn0031461,FBgn0033379,FBgn0033691,FBgn0033918,FBgn0034475,FBgn0035770,FBgn0035771,FBgn0035947,FBgn0036187,FBgn0036300,FBgn0036995,FBgn0038808,FBgn0038810,FBgn0039450,FBgn0069242,FBgn0086357,FBgn0086674,FBgn0243512,FBg…
tRNA metabolic process	GO:0006399	0.000374544	FBgn0002069,FBgn0003062,FBgn0005674,FBgn0026079,FBgn0027079,FBgn0027080,FBgn0027086,FBgn0027088,FBgn0027091,FBgn0027094,FBgn0031227,FBgn0031497,FBgn0033375,FBgn0034401,FBgn0039175,FBgn0086443
response to nutrient levels	GO:0031667	0.000375366	FBgn0003062,FBgn0004852,FBgn0011824,FBgn0016694,FBgn0020255,FBgn0020909,FBgn0026196,FBgn0033661,FBgn0035538,FBgn0036187,FBgn0036514,FBgn0036686,FBgn0038074,FBgn0038146,FBgn0038473,FBgn0038964,FBgn0050349,FBgn0052350,FBgn0259937,FBgn0262656,FBgn0263605
nitrogen compound transport	GO:0071705	0.000396784	FBgn0002638,FBgn0003360,FBgn0010391,FBgn0010638,FBgn0011016,FBgn0011509,FBgn0016041,FBgn0020255,FBgn0025700,FBgn0025724,FBgn0026252,FBgn0027359,FBgn0028327,FBgn0028646,FBgn0029939,FBgn0030306,FBgn0031049,FBgn0031461,FBgn0032938,FBgn0033379,FBgn0033691,FBgn0033918,FBgn0034475,FBgn0035770,FBgn0035771,FBgn0035947,FBgn0036187,FBgn0036300,FBgn0036995,FBgn0038524,FBgn0038808,FBgn0038810,FBgn0039450,FBg…
response to extracellular stimulus	GO:0009991	0.000422042	FBgn0003062,FBgn0004852,FBgn0011824,FBgn0016694,FBgn0020255,FBgn0020909,FBgn0026196,FBgn0033661,FBgn0035538,FBgn0036187,FBgn0036514,FBgn0036686,FBgn0038074,FBgn0038146,FBgn0038473,FBgn0038964,FBgn0050349,FBgn0052350,FBgn0259937,FBgn0262656,FBgn0263605
rRNA modification	GO:0000154	0.00045884	FBgn0003062,FBgn0011824,FBgn0026196,FBgn0030720,FBgn0033741,FBgn0037137,FBgn0038964,FBgn0259937
cellular amino acid biosynthetic process	GO:0008652	0.000586556	FBgn0000566,FBgn0001145,FBgn0023129,FBgn0029823,FBgn0030482,FBgn0038074,FBgn0039094,FBgn0039849,FBgn0270926
peptide secretion	GO:0002790	0.000777329	FBgn0010391,FBgn0029939,FBgn0031461,FBgn0034475,FBgn0035770,FBgn0036187,FBgn0039450,FBgn0069242,FBgn0086674,FBgn0243512,FBgn0262126,FBgn0262656,FBgn0263260
organonitrogen compound biosynthetic process	GO:1901566	0.00176826	FBgn0000052,FBgn0000053,FBgn0000566,FBgn0001145,FBgn0002069,FBgn0003162,FBgn0003360,FBgn0004852,FBgn0004926,FBgn0005648,FBgn0005674,FBgn0010391,FBgn0011224,FBgn0011296,FBgn0011509,FBgn0011666,FBgn0013672,FBgn0015393,FBgn0019932,FBgn0020251,FBgn0020306,FBgn0020443,FBgn0020513,FBgn0023129,FBgn0023213,FBgn0025700,FBgn0026259,FBgn0027079,FBgn0027080,FBgn0027086,FBgn0027088,FBgn0027091,FBgn0027094,FBg…
aspartate family amino acid metabolic process	GO:0009066	0.00279709	FBgn0000566,FBgn0014455,FBgn0031824,FBgn0038074,FBgn0039094,FBgn0039849,FBgn0270926
protein localization to membrane	GO:0072657	0.00391306	FBgn0010391,FBgn0010638,FBgn0011016,FBgn0011509,FBgn0025700,FBgn0028327,FBgn0035771,FBgn0035947,FBgn0038808,FBgn0038810,FBgn0262125,FBgn0262126
protein transport	GO:0015031	0.00391696	FBgn0002638,FBgn0010391,FBgn0010638,FBgn0011016,FBgn0011509,FBgn0016041,FBgn0020255,FBgn0025700,FBgn0025724,FBgn0026252,FBgn0027359,FBgn0028327,FBgn0030306,FBgn0031049,FBgn0031461,FBgn0033379,FBgn0033691,FBgn0033918,FBgn0035770,FBgn0035771,FBgn0035947,FBgn0036300,FBgn0036995,FBgn0038808,FBgn0038810,FBgn0039450,FBgn0069242,FBgn0086357,FBgn0086674,FBgn0243512,FBgn0262125,FBgn0262126,FBgn0263260,FBg…
RNA processing	GO:0006396	0.00433486	FBgn0003062,FBgn0003435,FBgn0005648,FBgn0011224,FBgn0011638,FBgn0011824,FBgn0015393,FBgn0016977,FBgn0020306,FBgn0020909,FBgn0022069,FBgn0026079,FBgn0026196,FBgn0027094,FBgn0028744,FBgn0030067,FBgn0030720,FBgn0031227,FBgn0031736,FBgn0032408,FBgn0032919,FBgn0033375,FBgn0033485,FBgn0033661,FBgn0033741,FBgn0034734,FBgn0035162,FBgn0036254,FBgn0036514,FBgn0036686,FBgn0037137,FBgn0037810,FBgn0038146,FBg…
organic acid catabolic process	GO:0016054	0.00490579	FBgn0001145,FBgn0003965,FBgn0014455,FBgn0023535,FBgn0031824,FBgn0032287,FBgn0034629,FBgn0035911,FBgn0037801,FBgn0037819,FBgn0039094
carboxylic acid catabolic process	GO:0046395	0.00490579	FBgn0001145,FBgn0003965,FBgn0014455,FBgn0023535,FBgn0031824,FBgn0032287,FBgn0034629,FBgn0035911,FBgn0037801,FBgn0037819,FBgn0039094
'de novo' IMP biosynthetic process	GO:0006189	0.00542279	FBgn0000052,FBgn0000053,FBgn0020513
establishment of protein localization	GO:0045184	0.00741452	FBgn0002638,FBgn0010391,FBgn0010638,FBgn0011016,FBgn0011509,FBgn0016041,FBgn0020255,FBgn0025700,FBgn0025724,FBgn0026252,FBgn0027359,FBgn0028327,FBgn0030306,FBgn0031049,FBgn0031461,FBgn0033379,FBgn0033691,FBgn0033918,FBgn0035770,FBgn0035771,FBgn0035947,FBgn0036300,FBgn0036995,FBgn0038808,FBgn0038810,FBgn0039450,FBgn0069242,FBgn0086357,FBgn0086674,FBgn0243512,FBgn0262125,FBgn0262126,FBgn0263260,FBg…
RNA modification	GO:0009451	0.00925796	FBgn0003062,FBgn0011824,FBgn0026079,FBgn0026196,FBgn0027094,FBgn0030720,FBgn0031227,FBgn0033375,FBgn0033741,FBgn0037137,FBgn0038964,FBgn0259937
single-organism biosynthetic process	GO:0044711	0.00931525	FBgn0000052,FBgn0000053,FBgn0000566,FBgn0001145,FBgn0003162,FBgn0003360,FBgn0003965,FBgn0004852,FBgn0005655,FBgn0010611,FBgn0011703,FBgn0011704,FBgn0013672,FBgn0020251,FBgn0020513,FBgn0023129,FBgn0026576,FBgn0029823,FBgn0030482,FBgn0031948,FBgn0032820,FBgn0034356,FBgn0035538,FBgn0036030,FBgn0036337,FBgn0037010,FBgn0038074,FBgn0038467,FBgn0038524,FBgn0039094,FBgn0039241,FBgn0039849,FBgn0041194,FBg…
glycine metabolic process	GO:0006544	0.0105357	FBgn0029823,FBgn0032287,FBgn0037801,FBgn0039094
heterocycle metabolic process	GO:0046483	0.0128356	FBgn0000052,FBgn0000053,FBgn0000546,FBgn0000964,FBgn0002069,FBgn0003062,FBgn0003162,FBgn0003278,FBgn0003360,FBgn0003435,FBgn0003965,FBgn0004396,FBgn0004595,FBgn0004606,FBgn0004638,FBgn0004652,FBgn0004852,FBgn0005648,FBgn0005655,FBgn0005674,FBgn0010222,FBgn0011224,FBgn0011638,FBgn0011703,FBgn0011704,FBgn0011824,FBgn0013672,FBgn0013678,FBgn0013683,FBgn0013684,FBgn0014388,FBgn0014455,FBgn0015393,FBg…
cellular nitrogen compound metabolic process	GO:0034641	0.0137133	FBgn0000052,FBgn0000053,FBgn0000546,FBgn0000566,FBgn0000964,FBgn0002069,FBgn0003062,FBgn0003162,FBgn0003278,FBgn0003360,FBgn0003435,FBgn0003965,FBgn0004396,FBgn0004595,FBgn0004606,FBgn0004638,FBgn0004652,FBgn0004852,FBgn0004926,FBgn0005648,FBgn0005655,FBgn0005674,FBgn0010222,FBgn0010391,FBgn0011224,FBgn0011296,FBgn0011509,FBgn0011638,FBgn0011666,FBgn0011703,FBgn0011704,FBgn0011824,FBgn0013672,FBg…
nucleobase-containing small molecule metabolic process	GO:0055086	0.014821	FBgn0000052,FBgn0000053,FBgn0003360,FBgn0004852,FBgn0011703,FBgn0011704,FBgn0013672,FBgn0013678,FBgn0013683,FBgn0013684,FBgn0014455,FBgn0020513,FBgn0022160,FBgn0034215,FBgn0035348,FBgn0035538,FBgn0036030,FBgn0036337,FBgn0038074,FBgn0038467,FBgn0039241,FBgn0039464,FBgn0041194,FBgn0086450,FBgn0260446,FBgn0262952
single-organism cellular process	GO:0044763	0.0168171	FBgn0000052,FBgn0000053,FBgn0000546,FBgn0000566,FBgn0000964,FBgn0001145,FBgn0001218,FBgn0001234,FBgn0002069,FBgn0002526,FBgn0002638,FBgn0002780,FBgn0002789,FBgn0003162,FBgn0003278,FBgn0003360,FBgn0003435,FBgn0003676,FBgn0003965,FBgn0004595,FBgn0004606,FBgn0004638,FBgn0004652,FBgn0004852,FBgn0004926,FBgn0005391,FBgn0005648,FBgn0005655,FBgn0005674,FBgn0010222,FBgn0010348,FBgn0010391,FBgn0010470,FBg…
negative regulation of autophagy	GO:0010507	0.017394	FBgn0003360,FBgn0010638,FBgn0013269,FBgn0031049,FBgn0031461,FBgn0086357
IMP biosynthetic process	GO:0006188	0.0177385	FBgn0000052,FBgn0000053,FBgn0020513
cellular aromatic compound metabolic process	GO:0006725	0.0214688	FBgn0000052,FBgn0000053,FBgn0000546,FBgn0000964,FBgn0002069,FBgn0002526,FBgn0003062,FBgn0003162,FBgn0003278,FBgn0003360,FBgn0003435,FBgn0003965,FBgn0004396,FBgn0004595,FBgn0004606,FBgn0004638,FBgn0004652,FBgn0004852,FBgn0005648,FBgn0005655,FBgn0005674,FBgn0010222,FBgn0011224,FBgn0011638,FBgn0011703,FBgn0011704,FBgn0011824,FBgn0013672,FBgn0013678,FBgn0013683,FBgn0013684,FBgn0014388,FBgn0014455,FBg…
basement membrane organization	GO:0071711	0.0215584	FBgn0026562,FBgn0035049,FBgn0262125,FBgn0262126,FBgn0267348
serine family amino acid biosynthetic process	GO:0009070	0.0258108	FBgn0000566,FBgn0023129,FBgn0029823,FBgn0039094
establishment of protein localization to organelle	GO:0072594	0.0265945	FBgn0002638,FBgn0010391,FBgn0010638,FBgn0011509,FBgn0016041,FBgn0020255,FBgn0025700,FBgn0026252,FBgn0027359,FBgn0030306,FBgn0033918,FBgn0035771,FBgn0035947,FBgn0036300,FBgn0038808,FBgn0038810,FBgn0266580
nucleotide biosynthetic process	GO:0009165	0.0276984	FBgn0000052,FBgn0000053,FBgn0003360,FBgn0004852,FBgn0011703,FBgn0011704,FBgn0013672,FBgn0020513,FBgn0035538,FBgn0036030,FBgn0036337,FBgn0038467,FBgn0039241,FBgn0260446
nucleoside phosphate biosynthetic process	GO:1901293	0.0276984	FBgn0000052,FBgn0000053,FBgn0003360,FBgn0004852,FBgn0011703,FBgn0011704,FBgn0013672,FBgn0020513,FBgn0035538,FBgn0036030,FBgn0036337,FBgn0038467,FBgn0039241,FBgn0260446
macromolecule localization	GO:0033036	0.0279081	FBgn0001234,FBgn0001257,FBgn0002638,FBgn0004595,FBgn0010348,FBgn0010391,FBgn0010638,FBgn0011016,FBgn0011509,FBgn0014141,FBgn0016041,FBgn0020255,FBgn0021795,FBgn0025700,FBgn0025724,FBgn0026252,FBgn0027359,FBgn0028327,FBgn0030306,FBgn0031049,FBgn0031069,FBgn0031461,FBgn0032136,FBgn0032938,FBgn0033379,FBgn0033539,FBgn0033691,FBgn0033918,FBgn0035770,FBgn0035771,FBgn0035947,FBgn0036300,FBgn0036995,FBg…
cellular metabolic process	GO:0044237	0.0297922	FBgn0000052,FBgn0000053,FBgn0000546,FBgn0000566,FBgn0000964,FBgn0001145,FBgn0001218,FBgn0001234,FBgn0002069,FBgn0002526,FBgn0003062,FBgn0003162,FBgn0003278,FBgn0003360,FBgn0003435,FBgn0003965,FBgn0004396,FBgn0004595,FBgn0004606,FBgn0004638,FBgn0004652,FBgn0004852,FBgn0004926,FBgn0005278,FBgn0005648,FBgn0005655,FBgn0005674,FBgn0010222,FBgn0010391,FBgn0010470,FBgn0010591,FBgn0010611,FBgn0010638,FBg…
cellular response to stress	GO:0033554	0.0298073	FBgn0001234,FBgn0002031,FBgn0003062,FBgn0003360,FBgn0004638,FBgn0004926,FBgn0005655,FBgn0011224,FBgn0011296,FBgn0011666,FBgn0011824,FBgn0014002,FBgn0016041,FBgn0020255,FBgn0020633,FBgn0020909,FBgn0023213,FBgn0025678,FBgn0026143,FBgn0026196,FBgn0031260,FBgn0033661,FBgn0035538,FBgn0036187,FBgn0036300,FBgn0036514,FBgn0036686,FBgn0038074,FBgn0038146,FBgn0038473,FBgn0038964,FBgn0039629,FBgn0039959,FBg…
nucleobase-containing compound metabolic process	GO:0006139	0.0310789	FBgn0000052,FBgn0000053,FBgn0000546,FBgn0000964,FBgn0002069,FBgn0003062,FBgn0003278,FBgn0003360,FBgn0003435,FBgn0004396,FBgn0004595,FBgn0004606,FBgn0004638,FBgn0004652,FBgn0004852,FBgn0005648,FBgn0005655,FBgn0005674,FBgn0011224,FBgn0011638,FBgn0011703,FBgn0011704,FBgn0011824,FBgn0013672,FBgn0013678,FBgn0013683,FBgn0013684,FBgn0014388,FBgn0014455,FBgn0015393,FBgn0016694,FBgn0016977,FBgn0019938,FBg…
organic acid biosynthetic process	GO:0016053	0.0364956	FBgn0000566,FBgn0001145,FBgn0003162,FBgn0023129,FBgn0029823,FBgn0030482,FBgn0038074,FBgn0039094,FBgn0039849,FBgn0270926
carboxylic acid biosynthetic process	GO:0046394	0.0364956	FBgn0000566,FBgn0001145,FBgn0003162,FBgn0023129,FBgn0029823,FBgn0030482,FBgn0038074,FBgn0039094,FBgn0039849,FBgn0270926
IMP metabolic process	GO:0046040	0.0367253	FBgn0000052,FBgn0000053,FBgn0020513
protein secretion	GO:0009306	0.0369473	FBgn0010391,FBgn0031461,FBgn0035770,FBgn0039450,FBgn0069242,FBgn0086674,FBgn0243512,FBgn0262126,FBgn0263260
intracellular protein transport	GO:0006886	0.0370582	FBgn0002638,FBgn0010391,FBgn0010638,FBgn0011016,FBgn0011509,FBgn0016041,FBgn0020255,FBgn0025700,FBgn0025724,FBgn0026252,FBgn0027359,FBgn0028327,FBgn0030306,FBgn0031049,FBgn0033379,FBgn0033691,FBgn0033918,FBgn0035771,FBgn0035947,FBgn0036300,FBgn0036995,FBgn0038808,FBgn0038810,FBgn0069242,FBgn0262125,FBgn0262126,FBgn0263396,FBgn0266580
regulation of secretion by cell	GO:1903530	0.0382813	FBgn0010391,FBgn0029939,FBgn0031461,FBgn0036187,FBgn0039900,FBgn0069242,FBgn0262125,FBgn0262126,FBgn0262656,FBgn0263260
organic cyclic compound metabolic process	GO:1901360	0.0410306	FBgn0000052,FBgn0000053,FBgn0000546,FBgn0000964,FBgn0002069,FBgn0002526,FBgn0003062,FBgn0003162,FBgn0003278,FBgn0003360,FBgn0003435,FBgn0003965,FBgn0004396,FBgn0004595,FBgn0004606,FBgn0004638,FBgn0004652,FBgn0004852,FBgn0005648,FBgn0005655,FBgn0005674,FBgn0010222,FBgn0011224,FBgn0011638,FBgn0011703,FBgn0011704,FBgn0011824,FBgn0013672,FBgn0013678,FBgn0013683,FBgn0013684,FBgn0014388,FBgn0014455,FBg…
regulation of peptide secretion	GO:0002791	0.0415539	FBgn0010391,FBgn0029939,FBgn0031461,FBgn0036187,FBgn0069242,FBgn0262656,FBgn0263260
cellular process	GO:0009987	0.0454306	FBgn0000052,FBgn0000053,FBgn0000546,FBgn0000566,FBgn0000964,FBgn0001145,FBgn0001218,FBgn0001234,FBgn0001257,FBgn0002031,FBgn0002069,FBgn0002526,FBgn0002638,FBgn0002780,FBgn0002789,FBgn0003062,FBgn0003162,FBgn0003278,FBgn0003360,FBgn0003435,FBgn0003676,FBgn0003965,FBgn0004396,FBgn0004595,FBgn0004606,FBgn0004638,FBgn0004652,FBgn0004852,FBgn0004926,FBgn0005278,FBgn0005391,FBgn0005648,FBgn0005655,FBg…
cellular modified amino acid biosynthetic process	GO:0042398	0.0457173	FBgn0000566,FBgn0003162,FBgn0037010,FBgn0038074

## Sheet: 1FN_VFN
Induced by Mating																				Repressed by mating
Biological Process				Cellular Component				Molecular Function				Protein Domain Enrichment				Pathway Enrichment				Biological Process				Cellular Component				Molecular Function				Protein Domain Enrichment				Pathway Enrichment
GO term	GO Identifier	P-value	Genes	GO term	GO Identifier	P-value	Genes	GO term	GO Identifier	P-value	Genes	Protein Domain	IPR Identifier	P-value	Genes	Pathways	Pathway Identifier	P-value	Genes	GO term	GO Identifier	P-value	Genes	GO term	GO Identifier	P-value	Genes	GO term	GO Identifier	P-value	Genes	Protein Domain	IPR Identifier	P-value	Genes	Pathways	Pathway Identifier	P-value	Genes
small molecule metabolic process	GO:0044281	2.02039e-05	FBgn0000052,FBgn0000053,FBgn0001248,FBgn0001258,FBgn0003308,FBgn0004396,FBgn0004852,FBgn0013307,FBgn0013683,FBgn0013684,FBgn0014455,FBgn0020251,FBgn0020513,FBgn0022160,FBgn0023537,FBgn0027580,FBgn0029114,FBgn0029969,FBgn0030482,FBgn0030612,FBgn0030737,FBgn0031824,FBgn0032287,FBgn0032820,FBgn0032945,FBgn0034276,FBgn0034356,FBgn0034390,FBgn0035266,FBgn0036262,FBgn0037612,FBgn0038662,FBgn0039094,FBg…	None				transferase activity, transferring one-carbon groups	GO:0016741	0.00954487	FBgn0000053,FBgn0014455,FBgn0030720,FBgn0032287,FBgn0032945,FBgn0033741,FBgn0034276,FBgn0039241,FBgn0040372,FBgn0264495	None				Metabolic pathways	1100	4.23403e-06	FBgn0000052,FBgn0000053,FBgn0001248,FBgn0001258,FBgn0003308,FBgn0013307,FBgn0014455,FBgn0019932,FBgn0020251,FBgn0020389,FBgn0020513,FBgn0023537,FBgn0024957,FBgn0025687,FBgn0027580,FBgn0029969,FBgn0030041,FBgn0030482,FBgn0030612,FBgn0030737,FBgn0031824,FBgn0032287,FBgn0032726,FBgn0032820,FBgn0033518,FBgn0034276,FBgn0034356,FBgn0034390,FBgn0035266,FBgn0036622,FBgn0037010,FBgn0037167,FBgn0038083,FBg…	None				extracellular space	GO:0005615	0.00153139	FBgn0000500,FBgn0001257,FBgn0033268,FBgn0033574,FBgn0034162,FBgn0034229,FBgn0036619,FBgn0036752,FBgn0036837,FBgn0037290,FBgn0038198,FBgn0039298,FBgn0039685,FBgn0085256	None				None				Metabolism of xenobiotics by cytochrome P450	980	0.0368232	FBgn0010548,FBgn0025814,FBgn0030484,FBgn0031418,FBgn0250732
organic acid metabolic process	GO:0006082	0.000223597	FBgn0001248,FBgn0001258,FBgn0003308,FBgn0013307,FBgn0014455,FBgn0020251,FBgn0023537,FBgn0027580,FBgn0029969,FBgn0030482,FBgn0030612,FBgn0030737,FBgn0031824,FBgn0032287,FBgn0032945,FBgn0034276,FBgn0034390,FBgn0038662,FBgn0039094,FBgn0270926					hydroxymethyl-, formyl- and related transferase activity	GO:0016742	0.0338327	FBgn0000053,FBgn0032945,FBgn0039241					Metabolism	R-DME-1430728	0.000577549	FBgn0000052,FBgn0000053,FBgn0001248,FBgn0001258,FBgn0003308,FBgn0004045,FBgn0004852,FBgn0005391,FBgn0013307,FBgn0014455,FBgn0019932,FBgn0020251,FBgn0020389,FBgn0020513,FBgn0022160,FBgn0023537,FBgn0025687,FBgn0027580,FBgn0029969,FBgn0030041,FBgn0030218,FBgn0030482,FBgn0030607,FBgn0030612,FBgn0030737,FBgn0031824,FBgn0032820,FBgn0032945,FBgn0034276,FBgn0034356,FBgn0034390,FBgn0035266,FBgn0036262,FBg…					extracellular region	GO:0005576	0.00751659	FBgn0000500,FBgn0001257,FBgn0003390,FBgn0033268,FBgn0033574,FBgn0034162,FBgn0034229,FBgn0036619,FBgn0036752,FBgn0036837,FBgn0037290,FBgn0038142,FBgn0038198,FBgn0039298,FBgn0039685,FBgn0043535,FBgn0052282,FBgn0085256									Biological oxidations	R-DME-211859	0.0495789	FBgn0010548,FBgn0015582,FBgn0025814,FBgn0030484,FBgn0031182,FBgn0046114
oxoacid metabolic process	GO:0043436	0.000223597	FBgn0001248,FBgn0001258,FBgn0003308,FBgn0013307,FBgn0014455,FBgn0020251,FBgn0023537,FBgn0027580,FBgn0029969,FBgn0030482,FBgn0030612,FBgn0030737,FBgn0031824,FBgn0032287,FBgn0032945,FBgn0034276,FBgn0034390,FBgn0038662,FBgn0039094,FBgn0270926													Branched-chain amino acid catabolism	R-DME-70895	0.00601077	FBgn0023537,FBgn0029969,FBgn0030482,FBgn0030612,FBgn0034390					extracellular region part	GO:0044421	0.00846438	FBgn0000500,FBgn0001257,FBgn0003390,FBgn0033268,FBgn0033574,FBgn0034162,FBgn0034229,FBgn0036619,FBgn0036752,FBgn0036837,FBgn0037290,FBgn0038198,FBgn0039298,FBgn0039685,FBgn0085256
carboxylic acid metabolic process	GO:0019752	0.000236747	FBgn0001248,FBgn0001258,FBgn0003308,FBgn0013307,FBgn0014455,FBgn0023537,FBgn0027580,FBgn0029969,FBgn0030482,FBgn0030612,FBgn0030737,FBgn0031824,FBgn0032287,FBgn0032945,FBgn0034276,FBgn0034390,FBgn0038662,FBgn0039094,FBgn0270926													One carbon pool by folate	670	0.00693605	FBgn0000053,FBgn0032287,FBgn0032945,FBgn0039241
alpha-amino acid metabolic process	GO:1901605	0.00045933	FBgn0003308,FBgn0013307,FBgn0014455,FBgn0023537,FBgn0030482,FBgn0031824,FBgn0032287,FBgn0034276,FBgn0039094,FBgn0270926													Purine ribonucleoside monophosphate biosynthesis	R-DME-73817	0.00745461	FBgn0000052,FBgn0000053,FBgn0020513,FBgn0039241
'de novo' IMP biosynthetic process	GO:0006189	0.00294184	FBgn0000052,FBgn0000053,FBgn0020513													Nucleobase biosynthesis	R-DME-8956320	0.0121959	FBgn0000052,FBgn0000053,FBgn0020513,FBgn0039241
organic acid catabolic process	GO:0016054	0.0056549	FBgn0001248,FBgn0014455,FBgn0029969,FBgn0031824,FBgn0032287,FBgn0032945,FBgn0034276,FBgn0039094													Lysine degradation	310	0.0232748	FBgn0025687,FBgn0029969,FBgn0031824,FBgn0040372,FBgn0264495
carboxylic acid catabolic process	GO:0046395	0.0056549	FBgn0001248,FBgn0014455,FBgn0029969,FBgn0031824,FBgn0032287,FBgn0032945,FBgn0034276,FBgn0039094													Metabolism of amino acids and derivatives	R-DME-71291	0.0245866	FBgn0013307,FBgn0014455,FBgn0019932,FBgn0023537,FBgn0025687,FBgn0029969,FBgn0030218,FBgn0030482,FBgn0030612,FBgn0031824,FBgn0034276,FBgn0034390
single-organism metabolic process	GO:0044710	0.00572189	FBgn0000052,FBgn0000053,FBgn0000097,FBgn0001234,FBgn0001248,FBgn0001258,FBgn0003308,FBgn0004396,FBgn0004852,FBgn0013307,FBgn0013683,FBgn0013684,FBgn0014455,FBgn0020251,FBgn0020513,FBgn0022160,FBgn0023537,FBgn0025687,FBgn0027580,FBgn0029114,FBgn0029969,FBgn0030026,FBgn0030482,FBgn0030607,FBgn0030612,FBgn0030737,FBgn0031044,FBgn0031417,FBgn0031824,FBgn0032287,FBgn0032820,FBgn0032945,FBgn0033518,FBg…													Valine, leucine and isoleucine degradation	280	0.0294703	FBgn0023537,FBgn0029969,FBgn0030482,FBgn0030612,FBgn0034390
cellular modified amino acid catabolic process	GO:0042219	0.00590865	FBgn0014455,FBgn0031824,FBgn0032945,FBgn0034276
cellular amino acid metabolic process	GO:0006520	0.00615726	FBgn0003308,FBgn0013307,FBgn0014455,FBgn0023537,FBgn0030482,FBgn0031824,FBgn0032287,FBgn0034276,FBgn0034390,FBgn0039094,FBgn0270926
IMP biosynthetic process	GO:0006188	0.00635552	FBgn0000052,FBgn0000053,FBgn0020513
small molecule catabolic process	GO:0044282	0.00636389	FBgn0001248,FBgn0014455,FBgn0029969,FBgn0031824,FBgn0032287,FBgn0032945,FBgn0034276,FBgn0036262,FBgn0039094
aspartate family amino acid metabolic process	GO:0009066	0.0112566	FBgn0014455,FBgn0031824,FBgn0034276,FBgn0039094,FBgn0270926
IMP metabolic process	GO:0046040	0.0115374	FBgn0000052,FBgn0000053,FBgn0020513
alpha-amino acid catabolic process	GO:1901606	0.02411	FBgn0014455,FBgn0031824,FBgn0032287,FBgn0034276,FBgn0039094
cellular amino acid catabolic process	GO:0009063	0.0310228	FBgn0014455,FBgn0031824,FBgn0032287,FBgn0034276,FBgn0039094

## Sheet: 3FG_VFG
Induced by Mating																				Repressed by mating
Biological Process				Cellular Component				Molecular Function				Protein Domain Enrichment				Pathway Enrichment				Biological Process				Cellular Component				Molecular Function				Protein Domain Enrichment				Pathway Enrichment
GO term	GO Identifier	P-value	Genes	GO term	GO Identifier	P-value	Genes	GO term	GO Identifier	P-value	Genes	Protein Domain	IPR Identifier	P-value	Genes	Pathways	Pathway Identifier	P-value	Genes	GO term	GO Identifier	P-value	Genes	GO term	GO Identifier	P-value	Genes	GO term	GO Identifier	P-value	Genes	Protein Domain	IPR Identifier	P-value	Genes	Pathways	Pathway Identifier	P-value	Genes
carboxylic acid metabolic process	GO:0019752	4.35436e-07	FBgn0000565,FBgn0001208,FBgn0013307,FBgn0013772,FBgn0014427,FBgn0014455,FBgn0027080,FBgn0027084,FBgn0027086,FBgn0027621,FBgn0029969,FBgn0030558,FBgn0031860,FBgn0032160,FBgn0032945,FBgn0033543,FBgn0034401,FBgn0034628,FBgn0036381,FBgn0036975,FBgn0037356,FBgn0037643,FBgn0038984,FBgn0040064,FBgn0052068,FBgn0086443,FBgn0086687,FBgn0263120,FBgn0263593	ribosomal subunit	GO:0044391	0.000186666	FBgn0003274,FBgn0010198,FBgn0010411,FBgn0015756,FBgn0017545,FBgn0024733,FBgn0028697,FBgn0031660,FBgn0032987,FBgn0033485,FBgn0033555,FBgn0036213,FBgn0036462,FBgn0037899,FBgn0040007,FBgn0064225	catalytic activity	GO:0003824	0.0171056	FBgn0000052,FBgn0000406,FBgn0000536,FBgn0000565,FBgn0000723,FBgn0001208,FBgn0001565,FBgn0002936,FBgn0003257,FBgn0004623,FBgn0005278,FBgn0005391,FBgn0010611,FBgn0013307,FBgn0013672,FBgn0013678,FBgn0013772,FBgn0014417,FBgn0014427,FBgn0014455,FBgn0015277,FBgn0016126,FBgn0019932,FBgn0020513,FBgn0024740,FBgn0024957,FBgn0025687,FBgn0027080,FBgn0027084,FBgn0027086,FBgn0027560,FBgn0027579,FBgn0027621,FBg…	None				Formation of a pool of free 40S subunits	R-DME-72689	5.36601e-07	FBgn0003274,FBgn0010198,FBgn0010411,FBgn0015756,FBgn0017545,FBgn0022023,FBgn0024733,FBgn0028697,FBgn0032987,FBgn0033555,FBgn0033902,FBgn0034237,FBgn0034258,FBgn0034654,FBgn0036213,FBgn0036258,FBgn0040007,FBgn0064225	response to external stimulus	GO:0009605	6.34127e-12	FBgn0000017,FBgn0000253,FBgn0000276,FBgn0000277,FBgn0000308,FBgn0000490,FBgn0000568,FBgn0000636,FBgn0001122,FBgn0001226,FBgn0002921,FBgn0003380,FBgn0003435,FBgn0004198,FBgn0004240,FBgn0004244,FBgn0004507,FBgn0004595,FBgn0004838,FBgn0005585,FBgn0005614,FBgn0005626,FBgn0005677,FBgn0010388,FBgn0011766,FBgn0012042,FBgn0014865,FBgn0016061,FBgn0023076,FBgn0032638,FBgn0032946,FBgn0033593,FBgn0034328,FBg…	extracellular space	GO:0005615	0.00508516	FBgn0000276,FBgn0000277,FBgn0000490,FBgn0001218,FBgn0002562,FBgn0005585,FBgn0012042,FBgn0023529,FBgn0026077,FBgn0033033,FBgn0033268,FBgn0033593,FBgn0034407,FBgn0036619,FBgn0036876,FBgn0037153,FBgn0038147,FBgn0039562,FBgn0040817,FBgn0041579,FBgn0041581,FBgn0050159,FBgn0052185,FBgn0052190,FBgn0086677	None				Attacin, C-terminal	IPR005521	0.00266561	FBgn0012042,FBgn0034407,FBgn0041579,FBgn0041581	Regulation of Insulin-like Growth Factor (IGF) transport and uptake by Insulin-like Growth Factor Binding Proteins (IGFBPs)	R-DME-381426	0.0172033	FBgn0000490,FBgn0003463,FBgn0025678,FBgn0039562,FBgn0052190,FBgn0259984,FBgn0263930
organic acid metabolic process	GO:0006082	8.01921e-07	FBgn0000565,FBgn0001208,FBgn0013307,FBgn0013772,FBgn0014427,FBgn0014455,FBgn0027080,FBgn0027084,FBgn0027086,FBgn0027621,FBgn0029969,FBgn0030558,FBgn0031860,FBgn0032160,FBgn0032945,FBgn0033543,FBgn0034401,FBgn0034628,FBgn0036381,FBgn0036975,FBgn0037356,FBgn0037643,FBgn0038984,FBgn0040064,FBgn0052068,FBgn0086443,FBgn0086687,FBgn0263120,FBgn0263593	cytosolic large ribosomal subunit	GO:0022625	0.000195935	FBgn0003274,FBgn0015756,FBgn0024733,FBgn0028697,FBgn0032987,FBgn0033485,FBgn0036213,FBgn0037899,FBgn0040007,FBgn0064225	carboxy-lyase activity	GO:0016831	0.0190337	FBgn0003257,FBgn0013307,FBgn0019932,FBgn0020513,FBgn0034356,FBgn0036975					L13a-mediated translational silencing of Ceruloplasmin expression	R-DME-156827	2.2647e-06	FBgn0003274,FBgn0010198,FBgn0010411,FBgn0015756,FBgn0017545,FBgn0022023,FBgn0024733,FBgn0028697,FBgn0032987,FBgn0033555,FBgn0033902,FBgn0034237,FBgn0034258,FBgn0034654,FBgn0036213,FBgn0036258,FBgn0040007,FBgn0064225	defense response to Gram-positive bacterium	GO:0050830	2.48221e-11	FBgn0000276,FBgn0000277,FBgn0010388,FBgn0012042,FBgn0014865,FBgn0032638,FBgn0033593,FBgn0034328,FBgn0034407,FBgn0039494,FBgn0041579,FBgn0041581,FBgn0050098,FBgn0052185	extracellular region	GO:0005576	0.00645751	FBgn0000276,FBgn0000277,FBgn0000490,FBgn0001218,FBgn0002562,FBgn0003984,FBgn0005585,FBgn0010388,FBgn0012042,FBgn0014865,FBgn0015399,FBgn0023529,FBgn0026077,FBgn0033033,FBgn0033268,FBgn0033593,FBgn0033602,FBgn0034328,FBgn0034407,FBgn0036619,FBgn0036876,FBgn0037153,FBgn0038147,FBgn0039494,FBgn0039562,FBgn0040817,FBgn0041579,FBgn0041581,FBgn0042201,FBgn0043575,FBgn0050052,FBgn0050159,FBgn0052185,FBg…					RNA recognition motif domain	IPR000504	0.0410659	FBgn0003435,FBgn0004838,FBgn0011206,FBgn0011666,FBgn0030479,FBgn0035016,FBgn0035424,FBgn0052423,FBgn0086675,FBgn0260400,FBgn0260943,FBgn0263995	Post-translational protein phosphorylation	R-DME-8957275	0.0172033	FBgn0000490,FBgn0003463,FBgn0025678,FBgn0039562,FBgn0052190,FBgn0259984,FBgn0263930
oxoacid metabolic process	GO:0043436	8.01921e-07	FBgn0000565,FBgn0001208,FBgn0013307,FBgn0013772,FBgn0014427,FBgn0014455,FBgn0027080,FBgn0027084,FBgn0027086,FBgn0027621,FBgn0029969,FBgn0030558,FBgn0031860,FBgn0032160,FBgn0032945,FBgn0033543,FBgn0034401,FBgn0034628,FBgn0036381,FBgn0036975,FBgn0037356,FBgn0037643,FBgn0038984,FBgn0040064,FBgn0052068,FBgn0086443,FBgn0086687,FBgn0263120,FBgn0263593	eukaryotic translation initiation factor 3 complex	GO:0005852	0.000204354	FBgn0022023,FBgn0033902,FBgn0034237,FBgn0034258,FBgn0034654,FBgn0036258,FBgn0086706	ligase activity	GO:0016874	0.0256784	FBgn0000052,FBgn0000565,FBgn0020513,FBgn0027080,FBgn0027084,FBgn0027086,FBgn0029969,FBgn0032160,FBgn0034110,FBgn0034366,FBgn0034401,FBgn0034628,FBgn0037643,FBgn0040064,FBgn0086443,FBgn0263120					Metabolism	R-DME-1430728	2.87446e-06	FBgn0000052,FBgn0000536,FBgn0001208,FBgn0003257,FBgn0005278,FBgn0005391,FBgn0010611,FBgn0013307,FBgn0013672,FBgn0013678,FBgn0013772,FBgn0014417,FBgn0014427,FBgn0014455,FBgn0015277,FBgn0019932,FBgn0020513,FBgn0025687,FBgn0027579,FBgn0027610,FBgn0027621,FBgn0028425,FBgn0029969,FBgn0030041,FBgn0030218,FBgn0030558,FBgn0030607,FBgn0031117,FBgn0031489,FBgn0031913,FBgn0032160,FBgn0032482,FBgn0032945,FBg…	response to stimulus	GO:0050896	7.32948e-07	FBgn0000017,FBgn0000253,FBgn0000273,FBgn0000276,FBgn0000277,FBgn0000308,FBgn0000448,FBgn0000479,FBgn0000490,FBgn0000568,FBgn0000636,FBgn0001122,FBgn0001226,FBgn0002643,FBgn0002921,FBgn0003380,FBgn0003435,FBgn0003463,FBgn0003984,FBgn0004198,FBgn0004240,FBgn0004244,FBgn0004507,FBgn0004595,FBgn0004838,FBgn0004858,FBgn0005585,FBgn0005614,FBgn0005626,FBgn0005677,FBgn0010388,FBgn0011666,FBgn0011766,FBg…									Attacin, N-terminal	IPR005520	0.0437622	FBgn0012042,FBgn0041579,FBgn0041581	Opioid Signalling	R-DME-111885	0.0186586	FBgn0000253,FBgn0000273,FBgn0000479,FBgn0001122,FBgn0259680
small molecule metabolic process	GO:0044281	9.49802e-06	FBgn0000052,FBgn0000565,FBgn0001208,FBgn0003257,FBgn0013307,FBgn0013672,FBgn0013678,FBgn0013772,FBgn0014427,FBgn0014455,FBgn0016076,FBgn0016126,FBgn0020513,FBgn0027080,FBgn0027084,FBgn0027086,FBgn0027621,FBgn0029969,FBgn0030558,FBgn0031489,FBgn0031860,FBgn0032160,FBgn0032482,FBgn0032945,FBgn0033543,FBgn0034356,FBgn0034401,FBgn0034628,FBgn0036030,FBgn0036046,FBgn0036262,FBgn0036381,FBgn0036975,FBg…	large ribosomal subunit	GO:0015934	0.000294803	FBgn0003274,FBgn0015756,FBgn0024733,FBgn0028697,FBgn0031660,FBgn0032987,FBgn0033485,FBgn0036213,FBgn0036462,FBgn0037899,FBgn0040007,FBgn0064225									Eukaryotic Translation Initiation	R-DME-72613	3.33396e-06	FBgn0003274,FBgn0010198,FBgn0010411,FBgn0015756,FBgn0017545,FBgn0022023,FBgn0024733,FBgn0028697,FBgn0032987,FBgn0033555,FBgn0033902,FBgn0034237,FBgn0034258,FBgn0034654,FBgn0036213,FBgn0036258,FBgn0040007,FBgn0064225	defense response to bacterium	GO:0042742	2.87867e-06	FBgn0000276,FBgn0000277,FBgn0001226,FBgn0004240,FBgn0004507,FBgn0010388,FBgn0012042,FBgn0014865,FBgn0032638,FBgn0033593,FBgn0034328,FBgn0034407,FBgn0039494,FBgn0041579,FBgn0041581,FBgn0050098,FBgn0052185,FBgn0052190,FBgn0283461													HuR (ELAVL1) binds and stabilizes mRNA	R-DME-450520	0.0190758	FBgn0086675,FBgn0259680,FBgn0260400
single-organism metabolic process	GO:0044710	2.44603e-05	FBgn0000052,FBgn0000406,FBgn0000536,FBgn0000565,FBgn0001208,FBgn0002936,FBgn0003257,FBgn0010611,FBgn0013307,FBgn0013672,FBgn0013678,FBgn0013772,FBgn0014427,FBgn0014455,FBgn0015277,FBgn0015622,FBgn0016076,FBgn0016126,FBgn0020513,FBgn0024740,FBgn0025687,FBgn0027080,FBgn0027084,FBgn0027086,FBgn0027560,FBgn0027579,FBgn0027621,FBgn0029648,FBgn0029831,FBgn0029969,FBgn0030558,FBgn0030607,FBgn0031489,FBg…	aminoacyl-tRNA synthetase multienzyme complex	GO:0017101	0.00645798	FBgn0027080,FBgn0027084,FBgn0027086,FBgn0034401									Cap-dependent Translation Initiation	R-DME-72737	3.33396e-06	FBgn0003274,FBgn0010198,FBgn0010411,FBgn0015756,FBgn0017545,FBgn0022023,FBgn0024733,FBgn0028697,FBgn0032987,FBgn0033555,FBgn0033902,FBgn0034237,FBgn0034258,FBgn0034654,FBgn0036213,FBgn0036258,FBgn0040007,FBgn0064225	antibacterial humoral response	GO:0019731	3.3176e-06	FBgn0000276,FBgn0000277,FBgn0004240,FBgn0010388,FBgn0012042,FBgn0014865,FBgn0034328,FBgn0041579,FBgn0041581,FBgn0283461
cytoplasmic translation	GO:0002181	2.68384e-05	FBgn0003274,FBgn0010198,FBgn0010411,FBgn0015756,FBgn0017545,FBgn0024733,FBgn0028697,FBgn0032987,FBgn0033485,FBgn0033555,FBgn0033902,FBgn0036213,FBgn0037899,FBgn0040007,FBgn0064225	cytosolic ribosome	GO:0022626	0.00692519	FBgn0003274,FBgn0010198,FBgn0010411,FBgn0015756,FBgn0017545,FBgn0024733,FBgn0028697,FBgn0032987,FBgn0033485,FBgn0033555,FBgn0036213,FBgn0037899,FBgn0040007,FBgn0064225									Ribosome	3010	0.000254555	FBgn0003274,FBgn0010198,FBgn0010411,FBgn0015756,FBgn0017545,FBgn0024733,FBgn0028697,FBgn0032987,FBgn0033555,FBgn0036213,FBgn0037899,FBgn0040007,FBgn0064225	single-multicellular organism process	GO:0044707	4.1967e-06	FBgn0000017,FBgn0000253,FBgn0000256,FBgn0000273,FBgn0000276,FBgn0000308,FBgn0000448,FBgn0000479,FBgn0000490,FBgn0000568,FBgn0000636,FBgn0001122,FBgn0001218,FBgn0001226,FBgn0002643,FBgn0002921,FBgn0002931,FBgn0003174,FBgn0003380,FBgn0003435,FBgn0003463,FBgn0003984,FBgn0004169,FBgn0004198,FBgn0004244,FBgn0004396,FBgn0004507,FBgn0004595,FBgn0004838,FBgn0004858,FBgn0004880,FBgn0005585,FBgn0005626,FBg…
cellular amino acid metabolic process	GO:0006520	0.000511158	FBgn0000565,FBgn0001208,FBgn0013307,FBgn0014427,FBgn0014455,FBgn0027080,FBgn0027084,FBgn0027086,FBgn0030558,FBgn0031860,FBgn0033543,FBgn0034401,FBgn0036381,FBgn0052068,FBgn0086443	ribosome	GO:0005840	0.0195028	FBgn0003274,FBgn0010198,FBgn0010411,FBgn0015756,FBgn0017545,FBgn0024733,FBgn0028697,FBgn0031660,FBgn0032987,FBgn0033485,FBgn0033555,FBgn0036213,FBgn0036462,FBgn0037899,FBgn0040007,FBgn0064225									Translation	R-DME-72766	0.000289454	FBgn0003274,FBgn0010198,FBgn0010411,FBgn0015756,FBgn0017545,FBgn0022023,FBgn0024733,FBgn0028697,FBgn0031660,FBgn0032987,FBgn0033555,FBgn0033902,FBgn0034237,FBgn0034258,FBgn0034654,FBgn0036213,FBgn0036258,FBgn0036462,FBgn0040007,FBgn0064225	system development	GO:0048731	4.61474e-06	FBgn0000017,FBgn0000253,FBgn0000273,FBgn0000276,FBgn0000308,FBgn0000448,FBgn0000479,FBgn0000490,FBgn0000636,FBgn0001122,FBgn0002643,FBgn0002921,FBgn0002931,FBgn0003174,FBgn0003380,FBgn0003435,FBgn0003463,FBgn0003984,FBgn0004169,FBgn0004198,FBgn0004396,FBgn0004595,FBgn0004838,FBgn0004858,FBgn0004880,FBgn0005585,FBgn0005626,FBgn0005677,FBgn0010113,FBgn0011481,FBgn0011666,FBgn0011766,FBgn0013343,FBg…
ribosome biogenesis	GO:0042254	0.00136792	FBgn0001565,FBgn0010411,FBgn0024733,FBgn0026196,FBgn0029885,FBgn0032138,FBgn0032919,FBgn0033454,FBgn0033485,FBgn0036213,FBgn0037899,FBgn0038146,FBgn0038473,FBgn0039183,FBgn0064225,FBgn0086706	cytoplasm	GO:0005737	0.0199275	FBgn0000052,FBgn0000406,FBgn0000536,FBgn0002936,FBgn0003274,FBgn0004623,FBgn0005278,FBgn0010198,FBgn0010411,FBgn0013307,FBgn0013672,FBgn0013678,FBgn0014396,FBgn0014427,FBgn0014455,FBgn0015277,FBgn0015622,FBgn0015756,FBgn0016126,FBgn0016685,FBgn0017545,FBgn0019932,FBgn0020513,FBgn0022023,FBgn0024733,FBgn0027080,FBgn0027084,FBgn0027086,FBgn0027560,FBgn0027579,FBgn0027610,FBgn0027621,FBgn0028697,FBg…									Formation of the ternary complex, and subsequently, the 43S complex	R-DME-72695	0.000581031	FBgn0010198,FBgn0010411,FBgn0017545,FBgn0022023,FBgn0033555,FBgn0033902,FBgn0034237,FBgn0034258,FBgn0034654,FBgn0036258	defense response to other organism	GO:0098542	8.74052e-06	FBgn0000276,FBgn0000277,FBgn0001226,FBgn0004240,FBgn0004507,FBgn0010388,FBgn0012042,FBgn0014865,FBgn0032638,FBgn0033593,FBgn0034328,FBgn0034407,FBgn0034511,FBgn0039494,FBgn0040817,FBgn0041579,FBgn0041581,FBgn0050098,FBgn0052185,FBgn0052190,FBgn0283461
cellular lipid metabolic process	GO:0044255	0.00547703	FBgn0000536,FBgn0010611,FBgn0013772,FBgn0015277,FBgn0027579,FBgn0029969,FBgn0030607,FBgn0032160,FBgn0034628,FBgn0036837,FBgn0037166,FBgn0037167,FBgn0037356,FBgn0037612,FBgn0038984,FBgn0040064,FBgn0050503,FBgn0086687,FBgn0263120,FBgn0263593	cytosolic part	GO:0044445	0.0327905	FBgn0003274,FBgn0010198,FBgn0010411,FBgn0015756,FBgn0017545,FBgn0024733,FBgn0028697,FBgn0032987,FBgn0033485,FBgn0033555,FBgn0033902,FBgn0036213,FBgn0037899,FBgn0040007,FBgn0064225									GTP hydrolysis and joining of the 60S ribosomal subunit	R-DME-72706	0.000835823	FBgn0003274,FBgn0010198,FBgn0010411,FBgn0015756,FBgn0017545,FBgn0024733,FBgn0028697,FBgn0032987,FBgn0033555,FBgn0036213,FBgn0040007,FBgn0064225	humoral immune response	GO:0006959	1.06371e-05	FBgn0000276,FBgn0000277,FBgn0000568,FBgn0004240,FBgn0010388,FBgn0011766,FBgn0012042,FBgn0014865,FBgn0034328,FBgn0034407,FBgn0041579,FBgn0041581,FBgn0052185,FBgn0283461
fatty acid metabolic process	GO:0006631	0.00880809	FBgn0013772,FBgn0029969,FBgn0032160,FBgn0034628,FBgn0037356,FBgn0038984,FBgn0040064,FBgn0086687,FBgn0263120,FBgn0263593													Nonsense Mediated Decay (NMD) independent of the Exon Junction Complex (EJC)	R-DME-975956	0.00125995	FBgn0003274,FBgn0010198,FBgn0010411,FBgn0015756,FBgn0017545,FBgn0024733,FBgn0028697,FBgn0032987,FBgn0033555,FBgn0036213,FBgn0040007,FBgn0064225	response to bacterium	GO:0009617	1.09648e-05	FBgn0000276,FBgn0000277,FBgn0001226,FBgn0004240,FBgn0004507,FBgn0010388,FBgn0012042,FBgn0014865,FBgn0032638,FBgn0033593,FBgn0034328,FBgn0034407,FBgn0039494,FBgn0041579,FBgn0041581,FBgn0050098,FBgn0052185,FBgn0052190,FBgn0283461
organic acid catabolic process	GO:0016054	0.0126957	FBgn0001208,FBgn0014455,FBgn0029969,FBgn0032160,FBgn0032945,FBgn0034628,FBgn0036381,FBgn0040064,FBgn0263593													SRP-dependent cotranslational protein targeting to membrane	R-DME-1799339	0.00135135	FBgn0003274,FBgn0010198,FBgn0010411,FBgn0015756,FBgn0017545,FBgn0024733,FBgn0028697,FBgn0032987,FBgn0033555,FBgn0036213,FBgn0040007,FBgn0064225	multicellular organism development	GO:0007275	2.32082e-05	FBgn0000017,FBgn0000253,FBgn0000256,FBgn0000273,FBgn0000276,FBgn0000308,FBgn0000448,FBgn0000479,FBgn0000490,FBgn0000568,FBgn0000636,FBgn0001122,FBgn0001226,FBgn0002643,FBgn0002921,FBgn0002931,FBgn0003174,FBgn0003380,FBgn0003435,FBgn0003463,FBgn0003984,FBgn0004169,FBgn0004198,FBgn0004396,FBgn0004507,FBgn0004595,FBgn0004838,FBgn0004858,FBgn0004880,FBgn0005585,FBgn0005626,FBgn0005677,FBgn0010113,FBg…
carboxylic acid catabolic process	GO:0046395	0.0126957	FBgn0001208,FBgn0014455,FBgn0029969,FBgn0032160,FBgn0032945,FBgn0034628,FBgn0036381,FBgn0040064,FBgn0263593													Metabolism of amino acids and derivatives	R-DME-71291	0.00135484	FBgn0001208,FBgn0005278,FBgn0013307,FBgn0014427,FBgn0014455,FBgn0019932,FBgn0025687,FBgn0027610,FBgn0028425,FBgn0029969,FBgn0030218,FBgn0030558,FBgn0033543,FBgn0036007,FBgn0036116,FBgn0036381,FBgn0052068,FBgn0053092	biological regulation	GO:0065007	2.77866e-05	FBgn0000017,FBgn0000253,FBgn0000256,FBgn0000273,FBgn0000276,FBgn0000308,FBgn0000448,FBgn0000479,FBgn0000490,FBgn0000568,FBgn0001122,FBgn0001186,FBgn0001218,FBgn0002643,FBgn0002921,FBgn0002931,FBgn0003380,FBgn0003463,FBgn0003984,FBgn0004169,FBgn0004198,FBgn0004240,FBgn0004244,FBgn0004396,FBgn0004507,FBgn0004595,FBgn0004838,FBgn0004858,FBgn0004880,FBgn0005614,FBgn0005626,FBgn0005677,FBgn0010113,FBg…
organic acid transport	GO:0015849	0.0160873	FBgn0027610,FBgn0028425,FBgn0030218,FBgn0031069,FBgn0036007,FBgn0036116,FBgn0036764,FBgn0039525,FBgn0042641,FBgn0050503													Translation initiation complex formation	R-DME-72649	0.00184473	FBgn0010198,FBgn0010411,FBgn0017545,FBgn0022023,FBgn0033555,FBgn0033902,FBgn0034237,FBgn0034258,FBgn0034654,FBgn0036258	response to biotic stimulus	GO:0009607	2.86446e-05	FBgn0000276,FBgn0000277,FBgn0000568,FBgn0001226,FBgn0004240,FBgn0004507,FBgn0010388,FBgn0011766,FBgn0012042,FBgn0014865,FBgn0032638,FBgn0033593,FBgn0034328,FBgn0034407,FBgn0034511,FBgn0039494,FBgn0040817,FBgn0041579,FBgn0041581,FBgn0050098,FBgn0052185,FBgn0052190,FBgn0283461
carboxylic acid transport	GO:0046942	0.0160873	FBgn0027610,FBgn0028425,FBgn0030218,FBgn0031069,FBgn0036007,FBgn0036116,FBgn0036764,FBgn0039525,FBgn0042641,FBgn0050503													Histidine, lysine, phenylalanine, tyrosine, proline and tryptophan catabolism	R-DME-6788656	0.00184976	FBgn0001208,FBgn0025687,FBgn0028425,FBgn0030558,FBgn0036007,FBgn0036116,FBgn0036381,FBgn0053092	response to external biotic stimulus	GO:0043207	2.86446e-05	FBgn0000276,FBgn0000277,FBgn0000568,FBgn0001226,FBgn0004240,FBgn0004507,FBgn0010388,FBgn0011766,FBgn0012042,FBgn0014865,FBgn0032638,FBgn0033593,FBgn0034328,FBgn0034407,FBgn0034511,FBgn0039494,FBgn0040817,FBgn0041579,FBgn0041581,FBgn0050098,FBgn0052185,FBgn0052190,FBgn0283461
lipid metabolic process	GO:0006629	0.0178158	FBgn0000406,FBgn0000536,FBgn0010611,FBgn0013772,FBgn0015277,FBgn0024740,FBgn0027579,FBgn0029831,FBgn0029969,FBgn0030607,FBgn0032160,FBgn0034628,FBgn0036837,FBgn0037166,FBgn0037167,FBgn0037356,FBgn0037612,FBgn0038984,FBgn0040064,FBgn0050503,FBgn0086687,FBgn0263120,FBgn0263593													Activation of the mRNA upon binding of the cap-binding complex and eIFs, and subsequent binding to 43S	R-DME-72662	0.00195541	FBgn0010198,FBgn0010411,FBgn0017545,FBgn0022023,FBgn0033555,FBgn0033902,FBgn0034237,FBgn0034258,FBgn0034654,FBgn0036258	response to other organism	GO:0051707	2.86446e-05	FBgn0000276,FBgn0000277,FBgn0000568,FBgn0001226,FBgn0004240,FBgn0004507,FBgn0010388,FBgn0011766,FBgn0012042,FBgn0014865,FBgn0032638,FBgn0033593,FBgn0034328,FBgn0034407,FBgn0034511,FBgn0039494,FBgn0040817,FBgn0041579,FBgn0041581,FBgn0050098,FBgn0052185,FBgn0052190,FBgn0283461
small molecule catabolic process	GO:0044282	0.0202568	FBgn0001208,FBgn0014455,FBgn0029969,FBgn0032160,FBgn0032945,FBgn0034628,FBgn0036262,FBgn0036381,FBgn0040064,FBgn0263593													Ribosomal scanning and start codon recognition	R-DME-72702	0.00195541	FBgn0010198,FBgn0010411,FBgn0017545,FBgn0022023,FBgn0033555,FBgn0033902,FBgn0034237,FBgn0034258,FBgn0034654,FBgn0036258	multi-organism process	GO:0051704	2.89998e-05	FBgn0000017,FBgn0000256,FBgn0000273,FBgn0000276,FBgn0000277,FBgn0000308,FBgn0000479,FBgn0000490,FBgn0000568,FBgn0000636,FBgn0001226,FBgn0002643,FBgn0003380,FBgn0003463,FBgn0003984,FBgn0004198,FBgn0004240,FBgn0004244,FBgn0004507,FBgn0004595,FBgn0004838,FBgn0005626,FBgn0010388,FBgn0011206,FBgn0011666,FBgn0011766,FBgn0012042,FBgn0013343,FBgn0013759,FBgn0014865,FBgn0015399,FBgn0032638,FBgn0033593,FBg…
lipid modification	GO:0030258	0.031323	FBgn0015277,FBgn0029969,FBgn0032160,FBgn0034628,FBgn0037166,FBgn0037167,FBgn0037612,FBgn0038984,FBgn0040064													Nonsense-Mediated Decay (NMD)	R-DME-927802	0.00444134	FBgn0003274,FBgn0010198,FBgn0010411,FBgn0015756,FBgn0017545,FBgn0024733,FBgn0028697,FBgn0032987,FBgn0033555,FBgn0036213,FBgn0040007,FBgn0064225	antimicrobial humoral response	GO:0019730	4.4078e-05	FBgn0000276,FBgn0000277,FBgn0000568,FBgn0004240,FBgn0010388,FBgn0011766,FBgn0012042,FBgn0014865,FBgn0034328,FBgn0041579,FBgn0041581,FBgn0283461
single-organism catabolic process	GO:0044712	0.0320275	FBgn0001208,FBgn0014455,FBgn0027621,FBgn0029831,FBgn0029969,FBgn0030607,FBgn0031489,FBgn0032160,FBgn0032945,FBgn0034110,FBgn0034366,FBgn0034628,FBgn0036262,FBgn0036381,FBgn0036837,FBgn0040064,FBgn0263593													Nonsense Mediated Decay (NMD) enhanced by the Exon Junction Complex (EJC)	R-DME-975957	0.00444134	FBgn0003274,FBgn0010198,FBgn0010411,FBgn0015756,FBgn0017545,FBgn0024733,FBgn0028697,FBgn0032987,FBgn0033555,FBgn0036213,FBgn0040007,FBgn0064225	multicellular organismal process	GO:0032501	8.22973e-05	FBgn0000017,FBgn0000253,FBgn0000256,FBgn0000273,FBgn0000276,FBgn0000308,FBgn0000448,FBgn0000479,FBgn0000490,FBgn0000568,FBgn0000636,FBgn0001122,FBgn0001218,FBgn0001226,FBgn0002643,FBgn0002921,FBgn0002931,FBgn0003174,FBgn0003380,FBgn0003435,FBgn0003463,FBgn0003984,FBgn0004169,FBgn0004198,FBgn0004244,FBgn0004396,FBgn0004507,FBgn0004595,FBgn0004838,FBgn0004858,FBgn0004880,FBgn0005585,FBgn0005614,FBg…
ribonucleoprotein complex biogenesis	GO:0022613	0.0424193	FBgn0001565,FBgn0010411,FBgn0024733,FBgn0026196,FBgn0029885,FBgn0032138,FBgn0032919,FBgn0033454,FBgn0033485,FBgn0036213,FBgn0037899,FBgn0038146,FBgn0038473,FBgn0039183,FBgn0064225,FBgn0086706													Synthesis of PE	R-DME-1483213	0.00827447	FBgn0000536,FBgn0032482,FBgn0036381,FBgn0263593	defense response	GO:0006952	9.75004e-05	FBgn0000017,FBgn0000276,FBgn0000277,FBgn0001226,FBgn0004240,FBgn0004507,FBgn0010388,FBgn0012042,FBgn0014865,FBgn0032638,FBgn0033593,FBgn0034328,FBgn0034407,FBgn0034511,FBgn0039494,FBgn0040817,FBgn0041579,FBgn0041581,FBgn0043575,FBgn0050098,FBgn0052185,FBgn0052190,FBgn0283461
ribosomal large subunit biogenesis	GO:0042273	0.045195	FBgn0024733,FBgn0032138,FBgn0033485,FBgn0036213,FBgn0037899,FBgn0038473,FBgn0064225													Cysteine and methionine metabolism	270	0.0250014	FBgn0005278,FBgn0014455,FBgn0019932,FBgn0030558,FBgn0052068	regulation of biological process	GO:0050789	0.000117137	FBgn0000017,FBgn0000253,FBgn0000256,FBgn0000273,FBgn0000276,FBgn0000308,FBgn0000448,FBgn0000479,FBgn0000490,FBgn0000568,FBgn0001122,FBgn0001218,FBgn0002643,FBgn0002921,FBgn0002931,FBgn0003380,FBgn0003463,FBgn0003984,FBgn0004169,FBgn0004198,FBgn0004240,FBgn0004244,FBgn0004396,FBgn0004507,FBgn0004595,FBgn0004838,FBgn0004858,FBgn0004880,FBgn0005614,FBgn0005626,FBgn0005677,FBgn0010113,FBgn0010388,FBg…
																Nucleobase biosynthesis	R-DME-8956320	0.0250408	FBgn0000052,FBgn0003257,FBgn0020513,FBgn0039241	immune system process	GO:0002376	0.000135231	FBgn0000017,FBgn0000276,FBgn0000277,FBgn0000490,FBgn0000568,FBgn0004240,FBgn0004507,FBgn0010388,FBgn0011766,FBgn0012042,FBgn0014865,FBgn0028550,FBgn0033593,FBgn0034328,FBgn0034407,FBgn0039494,FBgn0040817,FBgn0041579,FBgn0041581,FBgn0043575,FBgn0052185,FBgn0259984,FBgn0263995,FBgn0265193,FBgn0283461
																Metabolic pathways	1100	0.0350024	FBgn0000052,FBgn0000536,FBgn0001208,FBgn0003257,FBgn0005278,FBgn0010611,FBgn0013307,FBgn0014417,FBgn0014427,FBgn0014455,FBgn0015277,FBgn0015569,FBgn0019932,FBgn0020513,FBgn0024957,FBgn0025687,FBgn0027579,FBgn0029831,FBgn0029969,FBgn0030041,FBgn0030558,FBgn0031489,FBgn0031860,FBgn0032382,FBgn0032482,FBgn0034356,FBgn0034605,FBgn0034628,FBgn0036030,FBgn0036975,FBgn0037166,FBgn0037167,FBgn0037356,FBg…	animal organ morphogenesis	GO:0009887	0.000158671	FBgn0000017,FBgn0000253,FBgn0000273,FBgn0000276,FBgn0000308,FBgn0000490,FBgn0001122,FBgn0002643,FBgn0002921,FBgn0002931,FBgn0003174,FBgn0003463,FBgn0003984,FBgn0004169,FBgn0004198,FBgn0004396,FBgn0004595,FBgn0004858,FBgn0005585,FBgn0005677,FBgn0010113,FBgn0026411,FBgn0031118,FBgn0033033,FBgn0034408,FBgn0036801,FBgn0086677,FBgn0259789,FBgn0259984,FBgn0263930,FBgn0264006,FBgn0264272,FBgn0264442,FBg…
																Metabolism of lipids	R-DME-556833	0.0416694	FBgn0000536,FBgn0005391,FBgn0010611,FBgn0013772,FBgn0015277,FBgn0027579,FBgn0029969,FBgn0030607,FBgn0032160,FBgn0032482,FBgn0033065,FBgn0033464,FBgn0034628,FBgn0035028,FBgn0036381,FBgn0037166,FBgn0037167,FBgn0040064,FBgn0043791,FBgn0050503,FBgn0086687,FBgn0263120,FBgn0263593	immune response	GO:0006955	0.00016287	FBgn0000017,FBgn0000276,FBgn0000277,FBgn0000568,FBgn0004240,FBgn0004507,FBgn0010388,FBgn0011766,FBgn0012042,FBgn0014865,FBgn0028550,FBgn0034328,FBgn0034407,FBgn0039494,FBgn0041579,FBgn0041581,FBgn0043575,FBgn0052185,FBgn0265193,FBgn0283461
																				regulation of cellular process	GO:0050794	0.00029621	FBgn0000017,FBgn0000253,FBgn0000256,FBgn0000273,FBgn0000276,FBgn0000308,FBgn0000448,FBgn0000479,FBgn0000490,FBgn0000568,FBgn0001122,FBgn0001218,FBgn0002643,FBgn0002921,FBgn0002931,FBgn0003380,FBgn0003463,FBgn0003984,FBgn0004198,FBgn0004244,FBgn0004396,FBgn0004507,FBgn0004595,FBgn0004838,FBgn0004858,FBgn0004880,FBgn0005614,FBgn0005626,FBgn0005677,FBgn0010113,FBgn0010388,FBgn0011206,FBgn0011481,FBg…
																				defense response to Gram-negative bacterium	GO:0050829	0.000312331	FBgn0000276,FBgn0000277,FBgn0004240,FBgn0004507,FBgn0010388,FBgn0012042,FBgn0014865,FBgn0033593,FBgn0052185,FBgn0052190,FBgn0283461
																				anatomical structure development	GO:0048856	0.00031639	FBgn0000017,FBgn0000253,FBgn0000256,FBgn0000273,FBgn0000276,FBgn0000308,FBgn0000448,FBgn0000479,FBgn0000490,FBgn0000568,FBgn0000636,FBgn0001122,FBgn0001226,FBgn0002643,FBgn0002921,FBgn0002931,FBgn0003174,FBgn0003380,FBgn0003435,FBgn0003463,FBgn0003984,FBgn0004169,FBgn0004198,FBgn0004396,FBgn0004507,FBgn0004595,FBgn0004838,FBgn0004858,FBgn0004880,FBgn0005585,FBgn0005626,FBgn0005677,FBgn0010113,FBg…
																				axon development	GO:0061564	0.000319669	FBgn0000017,FBgn0000253,FBgn0000273,FBgn0000308,FBgn0000479,FBgn0000636,FBgn0003380,FBgn0003435,FBgn0004595,FBgn0004838,FBgn0005677,FBgn0010113,FBgn0014163,FBgn0016061,FBgn0086677,FBgn0259984,FBgn0261509,FBgn0263930,FBgn0264006,FBgn0264442
																				cell morphogenesis involved in neuron differentiation	GO:0048667	0.00036294	FBgn0000017,FBgn0000253,FBgn0000308,FBgn0000479,FBgn0000636,FBgn0001122,FBgn0003380,FBgn0003435,FBgn0004198,FBgn0004595,FBgn0004838,FBgn0004880,FBgn0005677,FBgn0010113,FBgn0011766,FBgn0014163,FBgn0016061,FBgn0027339,FBgn0085450,FBgn0086677,FBgn0259984,FBgn0261509,FBgn0263930,FBgn0264006,FBgn0264442
																				taxis	GO:0042330	0.000375633	FBgn0000017,FBgn0000253,FBgn0000308,FBgn0000490,FBgn0000636,FBgn0003435,FBgn0004198,FBgn0004595,FBgn0004838,FBgn0005626,FBgn0005677,FBgn0016061,FBgn0037163,FBgn0052423,FBgn0086677,FBgn0259984,FBgn0261509,FBgn0263930,FBgn0264006,FBgn0264442
																				animal organ development	GO:0048513	0.000419113	FBgn0000017,FBgn0000253,FBgn0000273,FBgn0000276,FBgn0000308,FBgn0000448,FBgn0000490,FBgn0001122,FBgn0002643,FBgn0002921,FBgn0002931,FBgn0003174,FBgn0003463,FBgn0003984,FBgn0004169,FBgn0004198,FBgn0004396,FBgn0004595,FBgn0004858,FBgn0005585,FBgn0005626,FBgn0005677,FBgn0010113,FBgn0011481,FBgn0011666,FBgn0011766,FBgn0013343,FBgn0026084,FBgn0026411,FBgn0030054,FBgn0031118,FBgn0033033,FBgn0034408,FBg…
																				cell morphogenesis involved in differentiation	GO:0000904	0.000497193	FBgn0000017,FBgn0000253,FBgn0000308,FBgn0000479,FBgn0000636,FBgn0001122,FBgn0003380,FBgn0003435,FBgn0004198,FBgn0004595,FBgn0004838,FBgn0004880,FBgn0005677,FBgn0010113,FBgn0011766,FBgn0014163,FBgn0016061,FBgn0027339,FBgn0085450,FBgn0086677,FBgn0259984,FBgn0261509,FBgn0263930,FBgn0264006,FBgn0264442,FBgn0266084
																				axonogenesis	GO:0007409	0.00063049	FBgn0000017,FBgn0000253,FBgn0000308,FBgn0000479,FBgn0000636,FBgn0003380,FBgn0003435,FBgn0004595,FBgn0004838,FBgn0005677,FBgn0010113,FBgn0014163,FBgn0016061,FBgn0086677,FBgn0259984,FBgn0261509,FBgn0263930,FBgn0264006,FBgn0264442
																				nervous system development	GO:0007399	0.000636282	FBgn0000017,FBgn0000253,FBgn0000273,FBgn0000308,FBgn0000448,FBgn0000479,FBgn0000636,FBgn0001122,FBgn0002643,FBgn0002921,FBgn0003380,FBgn0003435,FBgn0003984,FBgn0004198,FBgn0004595,FBgn0004838,FBgn0004858,FBgn0004880,FBgn0005585,FBgn0005677,FBgn0010113,FBgn0011481,FBgn0011766,FBgn0013759,FBgn0014163,FBgn0016061,FBgn0026084,FBgn0027339,FBgn0028550,FBgn0029814,FBgn0038063,FBgn0052423,FBgn0083963,FBg…
																				developmental process	GO:0032502	0.000642724	FBgn0000017,FBgn0000253,FBgn0000256,FBgn0000273,FBgn0000276,FBgn0000308,FBgn0000448,FBgn0000479,FBgn0000490,FBgn0000568,FBgn0000636,FBgn0001122,FBgn0001226,FBgn0002643,FBgn0002921,FBgn0002931,FBgn0003174,FBgn0003380,FBgn0003435,FBgn0003463,FBgn0003984,FBgn0004169,FBgn0004198,FBgn0004396,FBgn0004507,FBgn0004595,FBgn0004838,FBgn0004858,FBgn0004880,FBgn0005585,FBgn0005626,FBgn0005677,FBgn0010113,FBg…
																				imaginal disc development	GO:0007444	0.00064605	FBgn0000273,FBgn0000308,FBgn0000490,FBgn0001122,FBgn0002643,FBgn0002931,FBgn0003463,FBgn0003984,FBgn0004198,FBgn0004858,FBgn0005626,FBgn0005677,FBgn0011481,FBgn0011766,FBgn0013343,FBgn0026411,FBgn0030054,FBgn0031118,FBgn0033033,FBgn0036801,FBgn0036814,FBgn0050069,FBgn0259789,FBgn0263930,FBgn0264272,FBgn0264442,FBgn0266084
																				anatomical structure morphogenesis	GO:0009653	0.000732075	FBgn0000017,FBgn0000253,FBgn0000256,FBgn0000273,FBgn0000276,FBgn0000308,FBgn0000479,FBgn0000490,FBgn0000636,FBgn0001122,FBgn0002643,FBgn0002921,FBgn0002931,FBgn0003174,FBgn0003380,FBgn0003435,FBgn0003463,FBgn0003984,FBgn0004169,FBgn0004198,FBgn0004396,FBgn0004595,FBgn0004838,FBgn0004858,FBgn0004880,FBgn0005585,FBgn0005677,FBgn0010113,FBgn0011481,FBgn0011766,FBgn0013343,FBgn0014163,FBgn0016061,FBg…
																				cell projection organization	GO:0030030	0.000835236	FBgn0000017,FBgn0000253,FBgn0000273,FBgn0000308,FBgn0000479,FBgn0000490,FBgn0000636,FBgn0001122,FBgn0003380,FBgn0003435,FBgn0003984,FBgn0004198,FBgn0004595,FBgn0004838,FBgn0004880,FBgn0005677,FBgn0010113,FBgn0011481,FBgn0011766,FBgn0014163,FBgn0016061,FBgn0027339,FBgn0036165,FBgn0041094,FBgn0085450,FBgn0086677,FBgn0259984,FBgn0261509,FBgn0263930,FBgn0264006,FBgn0264272,FBgn0264442,FBgn0265487
																				imaginal disc-derived appendage development	GO:0048737	0.001048	FBgn0000273,FBgn0000490,FBgn0001122,FBgn0002643,FBgn0002931,FBgn0003463,FBgn0003984,FBgn0004198,FBgn0004858,FBgn0005677,FBgn0013343,FBgn0026411,FBgn0031118,FBgn0036801,FBgn0259789,FBgn0263930,FBgn0264272,FBgn0264442,FBgn0266084
																				chemotaxis	GO:0006935	0.00107186	FBgn0000017,FBgn0000253,FBgn0000308,FBgn0000490,FBgn0000636,FBgn0003435,FBgn0004198,FBgn0004595,FBgn0004838,FBgn0005677,FBgn0016061,FBgn0086677,FBgn0259984,FBgn0261509,FBgn0263930,FBgn0264006,FBgn0264442
																				single-organism developmental process	GO:0044767	0.00107921	FBgn0000017,FBgn0000253,FBgn0000256,FBgn0000273,FBgn0000276,FBgn0000308,FBgn0000448,FBgn0000479,FBgn0000490,FBgn0000568,FBgn0000636,FBgn0001122,FBgn0001226,FBgn0002643,FBgn0002921,FBgn0002931,FBgn0003174,FBgn0003380,FBgn0003435,FBgn0003463,FBgn0003984,FBgn0004169,FBgn0004198,FBgn0004396,FBgn0004507,FBgn0004595,FBgn0004838,FBgn0004858,FBgn0004880,FBgn0005585,FBgn0005626,FBgn0005677,FBgn0010113,FBg…
																				neuron projection development	GO:0031175	0.00108838	FBgn0000017,FBgn0000253,FBgn0000273,FBgn0000308,FBgn0000479,FBgn0000636,FBgn0001122,FBgn0003380,FBgn0003435,FBgn0004198,FBgn0004595,FBgn0004838,FBgn0004880,FBgn0005677,FBgn0010113,FBgn0011481,FBgn0011766,FBgn0014163,FBgn0016061,FBgn0027339,FBgn0085450,FBgn0086677,FBgn0259984,FBgn0261509,FBgn0263930,FBgn0264006,FBgn0264442
																				locomotion	GO:0040011	0.00125795	FBgn0000017,FBgn0000253,FBgn0000308,FBgn0000490,FBgn0000636,FBgn0001186,FBgn0003435,FBgn0003984,FBgn0004198,FBgn0004507,FBgn0004595,FBgn0004838,FBgn0005585,FBgn0005626,FBgn0005677,FBgn0013759,FBgn0016061,FBgn0037163,FBgn0052423,FBgn0086677,FBgn0259984,FBgn0261509,FBgn0261836,FBgn0263930,FBgn0264006,FBgn0264442,FBgn0266000,FBgn0266084
																				appendage development	GO:0048736	0.00126508	FBgn0000273,FBgn0000490,FBgn0001122,FBgn0002643,FBgn0002931,FBgn0003463,FBgn0003984,FBgn0004198,FBgn0004858,FBgn0005677,FBgn0013343,FBgn0026411,FBgn0031118,FBgn0036801,FBgn0259789,FBgn0263930,FBgn0264272,FBgn0264442,FBgn0266084
																				neuron projection morphogenesis	GO:0048812	0.00140647	FBgn0000017,FBgn0000253,FBgn0000308,FBgn0000479,FBgn0000636,FBgn0001122,FBgn0003380,FBgn0003435,FBgn0004198,FBgn0004595,FBgn0004838,FBgn0004880,FBgn0005677,FBgn0010113,FBgn0011481,FBgn0011766,FBgn0014163,FBgn0016061,FBgn0027339,FBgn0085450,FBgn0086677,FBgn0259984,FBgn0261509,FBgn0263930,FBgn0264006,FBgn0264442
																				cell projection morphogenesis	GO:0048858	0.00141776	FBgn0000017,FBgn0000253,FBgn0000308,FBgn0000479,FBgn0000636,FBgn0001122,FBgn0003380,FBgn0003435,FBgn0004198,FBgn0004595,FBgn0004838,FBgn0004880,FBgn0005677,FBgn0010113,FBgn0011481,FBgn0011766,FBgn0014163,FBgn0016061,FBgn0027339,FBgn0085450,FBgn0086677,FBgn0259984,FBgn0261509,FBgn0263930,FBgn0264006,FBgn0264442
																				plasma membrane bounded cell projection morphogenesis	GO:0120039	0.00141776	FBgn0000017,FBgn0000253,FBgn0000308,FBgn0000479,FBgn0000636,FBgn0001122,FBgn0003380,FBgn0003435,FBgn0004198,FBgn0004595,FBgn0004838,FBgn0004880,FBgn0005677,FBgn0010113,FBgn0011481,FBgn0011766,FBgn0014163,FBgn0016061,FBgn0027339,FBgn0085450,FBgn0086677,FBgn0259984,FBgn0261509,FBgn0263930,FBgn0264006,FBgn0264442
																				plasma membrane bounded cell projection organization	GO:0120036	0.00146171	FBgn0000017,FBgn0000253,FBgn0000273,FBgn0000308,FBgn0000479,FBgn0000490,FBgn0000636,FBgn0001122,FBgn0003380,FBgn0003435,FBgn0004198,FBgn0004595,FBgn0004838,FBgn0004880,FBgn0005677,FBgn0010113,FBgn0011481,FBgn0011766,FBgn0014163,FBgn0016061,FBgn0027339,FBgn0036165,FBgn0041094,FBgn0085450,FBgn0086677,FBgn0259984,FBgn0261509,FBgn0263930,FBgn0264006,FBgn0264272,FBgn0264442,FBgn0265487
																				metamorphosis	GO:0007552	0.00154368	FBgn0000253,FBgn0000273,FBgn0000276,FBgn0000308,FBgn0000448,FBgn0000490,FBgn0001122,FBgn0002643,FBgn0002931,FBgn0003463,FBgn0003984,FBgn0004198,FBgn0005677,FBgn0010113,FBgn0026411,FBgn0031118,FBgn0033033,FBgn0036801,FBgn0052423,FBgn0259789,FBgn0263930,FBgn0264272,FBgn0264442,FBgn0266084
																				tissue development	GO:0009888	0.00156864	FBgn0000017,FBgn0000256,FBgn0000273,FBgn0000308,FBgn0000490,FBgn0000636,FBgn0001122,FBgn0002643,FBgn0002931,FBgn0003463,FBgn0003984,FBgn0004169,FBgn0004198,FBgn0004838,FBgn0004858,FBgn0005626,FBgn0005677,FBgn0010113,FBgn0011481,FBgn0011766,FBgn0013343,FBgn0013759,FBgn0026411,FBgn0030054,FBgn0031118,FBgn0033033,FBgn0034408,FBgn0036801,FBgn0036814,FBgn0050069,FBgn0085446,FBgn0086677,FBgn0259789,FBg…
																				cell morphogenesis	GO:0000902	0.00157138	FBgn0000017,FBgn0000253,FBgn0000308,FBgn0000479,FBgn0000490,FBgn0000636,FBgn0001122,FBgn0002921,FBgn0003380,FBgn0003435,FBgn0004198,FBgn0004595,FBgn0004838,FBgn0004880,FBgn0005677,FBgn0010113,FBgn0011481,FBgn0011766,FBgn0014163,FBgn0016061,FBgn0027339,FBgn0085450,FBgn0086677,FBgn0259984,FBgn0261509,FBgn0263930,FBgn0264006,FBgn0264442,FBgn0266084
																				cell part morphogenesis	GO:0032990	0.00179216	FBgn0000017,FBgn0000253,FBgn0000308,FBgn0000479,FBgn0000636,FBgn0001122,FBgn0003380,FBgn0003435,FBgn0004198,FBgn0004595,FBgn0004838,FBgn0004880,FBgn0005677,FBgn0010113,FBgn0011481,FBgn0011766,FBgn0014163,FBgn0016061,FBgn0027339,FBgn0085450,FBgn0086677,FBgn0259984,FBgn0261509,FBgn0263930,FBgn0264006,FBgn0264442
																				instar larval or pupal development	GO:0002165	0.00187834	FBgn0000253,FBgn0000273,FBgn0000276,FBgn0000308,FBgn0000490,FBgn0000568,FBgn0001122,FBgn0002643,FBgn0002931,FBgn0003463,FBgn0003984,FBgn0004198,FBgn0004396,FBgn0005677,FBgn0010113,FBgn0026084,FBgn0026411,FBgn0030593,FBgn0031118,FBgn0033033,FBgn0036801,FBgn0259789,FBgn0263930,FBgn0264272,FBgn0264442,FBgn0266084
																				synaptic signaling	GO:0099536	0.0018928	FBgn0000017,FBgn0000273,FBgn0000479,FBgn0002921,FBgn0003380,FBgn0004244,FBgn0013334,FBgn0013343,FBgn0013759,FBgn0028875,FBgn0030897,FBgn0032151,FBgn0083963,FBgn0086677,FBgn0262483,FBgn0263995,FBgn0264006
																				chemical synaptic transmission	GO:0007268	0.00191178	FBgn0000017,FBgn0000273,FBgn0000479,FBgn0002921,FBgn0003380,FBgn0004244,FBgn0013334,FBgn0013343,FBgn0013759,FBgn0028875,FBgn0030897,FBgn0032151,FBgn0083963,FBgn0086677,FBgn0262483,FBgn0263995,FBgn0264006
																				anterograde trans-synaptic signaling	GO:0098916	0.00191178	FBgn0000017,FBgn0000273,FBgn0000479,FBgn0002921,FBgn0003380,FBgn0004244,FBgn0013334,FBgn0013343,FBgn0013759,FBgn0028875,FBgn0030897,FBgn0032151,FBgn0083963,FBgn0086677,FBgn0262483,FBgn0263995,FBgn0264006
																				trans-synaptic signaling	GO:0099537	0.00191178	FBgn0000017,FBgn0000273,FBgn0000479,FBgn0002921,FBgn0003380,FBgn0004244,FBgn0013334,FBgn0013343,FBgn0013759,FBgn0028875,FBgn0030897,FBgn0032151,FBgn0083963,FBgn0086677,FBgn0262483,FBgn0263995,FBgn0264006
																				neuron projection guidance	GO:0097485	0.00192717	FBgn0000017,FBgn0000253,FBgn0000308,FBgn0000636,FBgn0003435,FBgn0004198,FBgn0004595,FBgn0004838,FBgn0005677,FBgn0016061,FBgn0086677,FBgn0259984,FBgn0261509,FBgn0263930,FBgn0264006,FBgn0264442
																				post-embryonic development	GO:0009791	0.00194722	FBgn0000253,FBgn0000273,FBgn0000276,FBgn0000308,FBgn0000490,FBgn0000568,FBgn0001122,FBgn0002643,FBgn0002931,FBgn0003463,FBgn0003984,FBgn0004198,FBgn0004396,FBgn0005677,FBgn0010113,FBgn0011766,FBgn0026084,FBgn0026411,FBgn0030593,FBgn0031118,FBgn0033033,FBgn0036801,FBgn0259789,FBgn0261836,FBgn0263930,FBgn0264272,FBgn0264442,FBgn0266084
																				single organism signaling	GO:0044700	0.00223072	FBgn0000017,FBgn0000253,FBgn0000273,FBgn0000448,FBgn0000479,FBgn0000490,FBgn0000568,FBgn0001122,FBgn0002643,FBgn0002921,FBgn0003174,FBgn0003380,FBgn0003463,FBgn0003984,FBgn0004198,FBgn0004244,FBgn0004838,FBgn0004858,FBgn0005614,FBgn0011206,FBgn0013334,FBgn0013343,FBgn0013759,FBgn0015399,FBgn0023540,FBgn0024941,FBgn0028875,FBgn0029814,FBgn0029837,FBgn0030812,FBgn0030897,FBgn0031118,FBgn0032151,FBg…
																				signaling	GO:0023052	0.00229569	FBgn0000017,FBgn0000253,FBgn0000273,FBgn0000448,FBgn0000479,FBgn0000490,FBgn0000568,FBgn0001122,FBgn0002643,FBgn0002921,FBgn0003174,FBgn0003380,FBgn0003463,FBgn0003984,FBgn0004198,FBgn0004244,FBgn0004838,FBgn0004858,FBgn0005614,FBgn0011206,FBgn0013334,FBgn0013343,FBgn0013759,FBgn0015399,FBgn0023540,FBgn0024941,FBgn0028875,FBgn0029814,FBgn0029837,FBgn0030812,FBgn0030897,FBgn0031118,FBgn0032151,FBg…
																				post-embryonic animal morphogenesis	GO:0009886	0.00249457	FBgn0000253,FBgn0000273,FBgn0000276,FBgn0000308,FBgn0000490,FBgn0001122,FBgn0002643,FBgn0002931,FBgn0003463,FBgn0003984,FBgn0004198,FBgn0005677,FBgn0010113,FBgn0026084,FBgn0026411,FBgn0031118,FBgn0033033,FBgn0036801,FBgn0259789,FBgn0263930,FBgn0264272,FBgn0264442,FBgn0266084
																				tube development	GO:0035295	0.00264563	FBgn0000273,FBgn0000308,FBgn0000490,FBgn0001122,FBgn0002643,FBgn0002931,FBgn0003463,FBgn0003984,FBgn0004198,FBgn0004858,FBgn0005626,FBgn0005677,FBgn0010113,FBgn0011481,FBgn0011766,FBgn0013343,FBgn0026411,FBgn0030054,FBgn0031118,FBgn0033033,FBgn0036801,FBgn0036814,FBgn0039562,FBgn0050069,FBgn0259789,FBgn0263930,FBgn0264272,FBgn0264442,FBgn0266084
																				axon guidance	GO:0007411	0.00417125	FBgn0000017,FBgn0000253,FBgn0000308,FBgn0000636,FBgn0003435,FBgn0004595,FBgn0004838,FBgn0005677,FBgn0016061,FBgn0086677,FBgn0259984,FBgn0261509,FBgn0263930,FBgn0264006,FBgn0264442
																				neuron development	GO:0048666	0.00418161	FBgn0000017,FBgn0000253,FBgn0000273,FBgn0000308,FBgn0000479,FBgn0000636,FBgn0001122,FBgn0003380,FBgn0003435,FBgn0004198,FBgn0004595,FBgn0004838,FBgn0004880,FBgn0005677,FBgn0010113,FBgn0011481,FBgn0011766,FBgn0014163,FBgn0016061,FBgn0027339,FBgn0052423,FBgn0085450,FBgn0086677,FBgn0259984,FBgn0261509,FBgn0263930,FBgn0264006,FBgn0264442,FBgn0265487
																				instar larval or pupal morphogenesis	GO:0048707	0.0046156	FBgn0000253,FBgn0000273,FBgn0000276,FBgn0000308,FBgn0000490,FBgn0001122,FBgn0002643,FBgn0002931,FBgn0003463,FBgn0003984,FBgn0004198,FBgn0005677,FBgn0010113,FBgn0026411,FBgn0031118,FBgn0033033,FBgn0036801,FBgn0259789,FBgn0263930,FBgn0264272,FBgn0264442,FBgn0266084
																				sleep	GO:0030431	0.00476995	FBgn0000273,FBgn0001218,FBgn0003380,FBgn0004244,FBgn0005585,FBgn0012042,FBgn0023076,FBgn0025678,FBgn0038733,FBgn0052423,FBgn0265193
																				imaginal disc morphogenesis	GO:0007560	0.00533528	FBgn0000273,FBgn0000308,FBgn0000490,FBgn0001122,FBgn0002643,FBgn0002931,FBgn0003463,FBgn0003984,FBgn0004198,FBgn0005677,FBgn0026411,FBgn0031118,FBgn0033033,FBgn0036801,FBgn0259789,FBgn0263930,FBgn0264272,FBgn0264442,FBgn0266084
																				post-embryonic animal organ morphogenesis	GO:0048563	0.00533528	FBgn0000273,FBgn0000308,FBgn0000490,FBgn0001122,FBgn0002643,FBgn0002931,FBgn0003463,FBgn0003984,FBgn0004198,FBgn0005677,FBgn0026411,FBgn0031118,FBgn0033033,FBgn0036801,FBgn0259789,FBgn0263930,FBgn0264272,FBgn0264442,FBgn0266084
																				post-embryonic animal organ development	GO:0048569	0.00537134	FBgn0000273,FBgn0000308,FBgn0000490,FBgn0001122,FBgn0002643,FBgn0002931,FBgn0003463,FBgn0003984,FBgn0004198,FBgn0005677,FBgn0011766,FBgn0026411,FBgn0031118,FBgn0033033,FBgn0036801,FBgn0259789,FBgn0261836,FBgn0263930,FBgn0264272,FBgn0264442,FBgn0266084
																				cell communication	GO:0007154	0.00555186	FBgn0000017,FBgn0000253,FBgn0000273,FBgn0000448,FBgn0000479,FBgn0000490,FBgn0000568,FBgn0001122,FBgn0002643,FBgn0002921,FBgn0003174,FBgn0003380,FBgn0003463,FBgn0003984,FBgn0004198,FBgn0004244,FBgn0004838,FBgn0004858,FBgn0005614,FBgn0011206,FBgn0013334,FBgn0013343,FBgn0013759,FBgn0015399,FBgn0023540,FBgn0024941,FBgn0028875,FBgn0029814,FBgn0029837,FBgn0030812,FBgn0030897,FBgn0031118,FBgn0032151,FBg…
																				response to abiotic stimulus	GO:0009628	0.00555641	FBgn0000253,FBgn0000273,FBgn0000479,FBgn0001122,FBgn0001226,FBgn0002921,FBgn0003380,FBgn0004240,FBgn0004244,FBgn0005614,FBgn0005626,FBgn0011666,FBgn0012042,FBgn0023076,FBgn0030054,FBgn0032946,FBgn0037163,FBgn0052423,FBgn0085387,FBgn0263995,FBgn0265193
																				system process	GO:0003008	0.00576267	FBgn0000017,FBgn0000253,FBgn0000273,FBgn0000479,FBgn0000636,FBgn0001122,FBgn0002921,FBgn0003380,FBgn0003984,FBgn0004169,FBgn0004198,FBgn0004244,FBgn0004595,FBgn0005585,FBgn0005614,FBgn0013334,FBgn0013759,FBgn0023076,FBgn0027556,FBgn0029893,FBgn0030812,FBgn0032946,FBgn0033268,FBgn0034286,FBgn0035016,FBgn0050052,FBgn0263995,FBgn0264006,FBgn0266084
																				imaginal disc-derived appendage morphogenesis	GO:0035114	0.00590679	FBgn0000273,FBgn0000490,FBgn0001122,FBgn0002643,FBgn0002931,FBgn0003463,FBgn0003984,FBgn0004198,FBgn0005677,FBgn0026411,FBgn0031118,FBgn0036801,FBgn0259789,FBgn0263930,FBgn0264272,FBgn0264442,FBgn0266084
																				epithelium development	GO:0060429	0.00602979	FBgn0000017,FBgn0000256,FBgn0000273,FBgn0000308,FBgn0000490,FBgn0000636,FBgn0001122,FBgn0002643,FBgn0002931,FBgn0003463,FBgn0003984,FBgn0004198,FBgn0004838,FBgn0004858,FBgn0005626,FBgn0005677,FBgn0010113,FBgn0011481,FBgn0011766,FBgn0013343,FBgn0013759,FBgn0026411,FBgn0030054,FBgn0031118,FBgn0033033,FBgn0034408,FBgn0036801,FBgn0036814,FBgn0050069,FBgn0259789,FBgn0259984,FBgn0263930,FBgn0264272,FBg…
																				wing disc development	GO:0035220	0.00625848	FBgn0000273,FBgn0000490,FBgn0001122,FBgn0002643,FBgn0002931,FBgn0003463,FBgn0003984,FBgn0004198,FBgn0004858,FBgn0005626,FBgn0011481,FBgn0036801,FBgn0036814,FBgn0050069,FBgn0259789,FBgn0263930,FBgn0264272,FBgn0264442,FBgn0266084
																				appendage morphogenesis	GO:0035107	0.00634916	FBgn0000273,FBgn0000490,FBgn0001122,FBgn0002643,FBgn0002931,FBgn0003463,FBgn0003984,FBgn0004198,FBgn0005677,FBgn0026411,FBgn0031118,FBgn0036801,FBgn0259789,FBgn0263930,FBgn0264272,FBgn0264442,FBgn0266084
																				neuron differentiation	GO:0030182	0.0067292	FBgn0000017,FBgn0000253,FBgn0000273,FBgn0000308,FBgn0000479,FBgn0000636,FBgn0001122,FBgn0003380,FBgn0003435,FBgn0004198,FBgn0004595,FBgn0004838,FBgn0004858,FBgn0004880,FBgn0005677,FBgn0010113,FBgn0011481,FBgn0011766,FBgn0014163,FBgn0016061,FBgn0027339,FBgn0052423,FBgn0085450,FBgn0086677,FBgn0259984,FBgn0261509,FBgn0263930,FBgn0264006,FBgn0264272,FBgn0264442,FBgn0265487
																				muscle cell cellular homeostasis	GO:0046716	0.00748236	FBgn0000253,FBgn0004169,FBgn0032151,FBgn0264006,FBgn0265487,FBgn0266084
																				cellular component morphogenesis	GO:0032989	0.00764359	FBgn0000017,FBgn0000253,FBgn0000308,FBgn0000479,FBgn0000490,FBgn0000636,FBgn0001122,FBgn0002921,FBgn0003380,FBgn0003435,FBgn0004169,FBgn0004198,FBgn0004595,FBgn0004838,FBgn0004880,FBgn0005677,FBgn0010113,FBgn0011481,FBgn0011766,FBgn0014163,FBgn0016061,FBgn0027339,FBgn0085450,FBgn0086677,FBgn0259984,FBgn0261509,FBgn0263930,FBgn0264006,FBgn0264442,FBgn0266084
																				regulation of cell communication	GO:0010646	0.00786224	FBgn0000253,FBgn0000273,FBgn0000479,FBgn0000490,FBgn0001122,FBgn0003380,FBgn0003463,FBgn0003984,FBgn0004198,FBgn0004244,FBgn0013334,FBgn0013759,FBgn0015399,FBgn0023540,FBgn0024941,FBgn0030812,FBgn0030897,FBgn0033593,FBgn0036165,FBgn0038063,FBgn0039494,FBgn0041094,FBgn0050159,FBgn0083963,FBgn0085450,FBgn0086677,FBgn0259678,FBgn0259984,FBgn0263930,FBgn0264006,FBgn0264894
																				regulation of signaling	GO:0023051	0.0079325	FBgn0000253,FBgn0000273,FBgn0000479,FBgn0000490,FBgn0001122,FBgn0003380,FBgn0003463,FBgn0003984,FBgn0004198,FBgn0004244,FBgn0013334,FBgn0013759,FBgn0015399,FBgn0023540,FBgn0024941,FBgn0030812,FBgn0030897,FBgn0033593,FBgn0036165,FBgn0038063,FBgn0039494,FBgn0041094,FBgn0050159,FBgn0083963,FBgn0085450,FBgn0086677,FBgn0259678,FBgn0259984,FBgn0263930,FBgn0264006,FBgn0264894
																				cell-cell signaling	GO:0007267	0.00834351	FBgn0000017,FBgn0000253,FBgn0000273,FBgn0000479,FBgn0001122,FBgn0002921,FBgn0003174,FBgn0003380,FBgn0003984,FBgn0004244,FBgn0004838,FBgn0011206,FBgn0013334,FBgn0013343,FBgn0013759,FBgn0028875,FBgn0030897,FBgn0032151,FBgn0051781,FBgn0083963,FBgn0086677,FBgn0262483,FBgn0263930,FBgn0263995,FBgn0264006,FBgn0264272
																				modulation of chemical synaptic transmission	GO:0050804	0.00867541	FBgn0000273,FBgn0003380,FBgn0004244,FBgn0013334,FBgn0013759,FBgn0030897,FBgn0083963,FBgn0086677,FBgn0264006
																				central nervous system development	GO:0007417	0.00885498	FBgn0000017,FBgn0000308,FBgn0000448,FBgn0001122,FBgn0002643,FBgn0003984,FBgn0004198,FBgn0004595,FBgn0005585,FBgn0005677,FBgn0011766,FBgn0026084,FBgn0259984,FBgn0260400,FBgn0264442
																				response to stress	GO:0006950	0.00919825	FBgn0000017,FBgn0000253,FBgn0000273,FBgn0000276,FBgn0000277,FBgn0000308,FBgn0001122,FBgn0001226,FBgn0004240,FBgn0004507,FBgn0005614,FBgn0005626,FBgn0010388,FBgn0011666,FBgn0012042,FBgn0014865,FBgn0025678,FBgn0030054,FBgn0032638,FBgn0033593,FBgn0034328,FBgn0034407,FBgn0034511,FBgn0036165,FBgn0036746,FBgn0039494,FBgn0039562,FBgn0040817,FBgn0041094,FBgn0041579,FBgn0041581,FBgn0043575,FBgn0050098,FBg…
																				post-embryonic appendage morphogenesis	GO:0035120	0.0122566	FBgn0000273,FBgn0000490,FBgn0001122,FBgn0002643,FBgn0002931,FBgn0003463,FBgn0003984,FBgn0004198,FBgn0026411,FBgn0031118,FBgn0036801,FBgn0259789,FBgn0263930,FBgn0264272,FBgn0264442,FBgn0266084
																				tube morphogenesis	GO:0035239	0.0141835	FBgn0000273,FBgn0000308,FBgn0000490,FBgn0001122,FBgn0002643,FBgn0002931,FBgn0003463,FBgn0003984,FBgn0004198,FBgn0005677,FBgn0010113,FBgn0026411,FBgn0031118,FBgn0033033,FBgn0036801,FBgn0039562,FBgn0259789,FBgn0263930,FBgn0264272,FBgn0264442,FBgn0266084
																				leg disc proximal/distal pattern formation	GO:0007479	0.0148429	FBgn0000490,FBgn0003984,FBgn0005677,FBgn0026411
																				negative regulation of biological process	GO:0048519	0.0148892	FBgn0000017,FBgn0000253,FBgn0000273,FBgn0000308,FBgn0000448,FBgn0000490,FBgn0000568,FBgn0001122,FBgn0001218,FBgn0002931,FBgn0003463,FBgn0003984,FBgn0004198,FBgn0004244,FBgn0004507,FBgn0004595,FBgn0004838,FBgn0004858,FBgn0004880,FBgn0005677,FBgn0010113,FBgn0011666,FBgn0011766,FBgn0015399,FBgn0023076,FBgn0026411,FBgn0027339,FBgn0030812,FBgn0031191,FBgn0033865,FBgn0036165,FBgn0037720,FBgn0039488,FBg…
																				epithelial tube morphogenesis	GO:0060562	0.0158471	FBgn0000273,FBgn0000308,FBgn0000490,FBgn0001122,FBgn0002643,FBgn0002931,FBgn0003463,FBgn0003984,FBgn0004198,FBgn0005677,FBgn0010113,FBgn0026411,FBgn0031118,FBgn0033033,FBgn0036801,FBgn0259789,FBgn0263930,FBgn0264272,FBgn0264442,FBgn0266084
																				neurological system process	GO:0050877	0.0183295	FBgn0000017,FBgn0000253,FBgn0000273,FBgn0000479,FBgn0000636,FBgn0001122,FBgn0002921,FBgn0003380,FBgn0003984,FBgn0004198,FBgn0004244,FBgn0004595,FBgn0005585,FBgn0005614,FBgn0013334,FBgn0013759,FBgn0029893,FBgn0030812,FBgn0032946,FBgn0033268,FBgn0034286,FBgn0035016,FBgn0050052,FBgn0263995,FBgn0264006
																				learning or memory	GO:0007611	0.0187217	FBgn0000017,FBgn0000273,FBgn0000479,FBgn0000636,FBgn0003380,FBgn0003984,FBgn0004244,FBgn0013334,FBgn0013759,FBgn0030812,FBgn0035016
																				cognition	GO:0050890	0.0187217	FBgn0000017,FBgn0000273,FBgn0000479,FBgn0000636,FBgn0003380,FBgn0003984,FBgn0004244,FBgn0013334,FBgn0013759,FBgn0030812,FBgn0035016
																				regulation of transcription from RNA polymerase II promoter	GO:0006357	0.0194101	FBgn0000448,FBgn0000490,FBgn0000568,FBgn0002643,FBgn0002931,FBgn0003463,FBgn0004198,FBgn0004396,FBgn0004595,FBgn0004880,FBgn0005677,FBgn0011481,FBgn0011766,FBgn0023076,FBgn0028550,FBgn0030479,FBgn0033865,FBgn0036746,FBgn0037720,FBgn0085450,FBgn0263930,FBgn0264442,FBgn0265193,FBgn0267033
																				signal transduction	GO:0007165	0.0194514	FBgn0000017,FBgn0000253,FBgn0000273,FBgn0000276,FBgn0000448,FBgn0000479,FBgn0000490,FBgn0000568,FBgn0001122,FBgn0002643,FBgn0003463,FBgn0003984,FBgn0004198,FBgn0004244,FBgn0004858,FBgn0005614,FBgn0010113,FBgn0011766,FBgn0015399,FBgn0023540,FBgn0024941,FBgn0028875,FBgn0029814,FBgn0029837,FBgn0030812,FBgn0031118,FBgn0032151,FBgn0033593,FBgn0034328,FBgn0035255,FBgn0036165,FBgn0037163,FBgn0038063,FBg…
																				developmental growth	GO:0048589	0.0195918	FBgn0000017,FBgn0000273,FBgn0000308,FBgn0000479,FBgn0000490,FBgn0001122,FBgn0002921,FBgn0003380,FBgn0010113,FBgn0013759,FBgn0026077,FBgn0030054,FBgn0038063,FBgn0086677,FBgn0259984,FBgn0263930,FBgn0264006
																				transcription from RNA polymerase II promoter	GO:0006366	0.0209303	FBgn0000448,FBgn0000490,FBgn0000568,FBgn0002643,FBgn0002931,FBgn0003463,FBgn0004198,FBgn0004396,FBgn0004595,FBgn0004880,FBgn0005677,FBgn0011481,FBgn0011766,FBgn0023076,FBgn0028550,FBgn0030479,FBgn0033865,FBgn0036746,FBgn0037720,FBgn0085450,FBgn0263930,FBgn0264442,FBgn0265193,FBgn0267033
																				behavior	GO:0007610	0.0211032	FBgn0000017,FBgn0000273,FBgn0000479,FBgn0000636,FBgn0002921,FBgn0003380,FBgn0003435,FBgn0003984,FBgn0004244,FBgn0004595,FBgn0005585,FBgn0005626,FBgn0011206,FBgn0013334,FBgn0013759,FBgn0023076,FBgn0030812,FBgn0035016,FBgn0052423,FBgn0053988,FBgn0085387,FBgn0086675,FBgn0263995,FBgn0264006,FBgn0265487
																				imaginal disc-derived wing morphogenesis	GO:0007476	0.0212203	FBgn0000273,FBgn0000490,FBgn0001122,FBgn0002643,FBgn0002931,FBgn0003463,FBgn0003984,FBgn0004198,FBgn0036801,FBgn0259789,FBgn0263930,FBgn0264272,FBgn0264442,FBgn0266084
																				leg disc pattern formation	GO:0035223	0.0213436	FBgn0000490,FBgn0003984,FBgn0005677,FBgn0026411
																				regulation of cellular biosynthetic process	GO:0031326	0.0246911	FBgn0000273,FBgn0000448,FBgn0000490,FBgn0000568,FBgn0001122,FBgn0002643,FBgn0002931,FBgn0003463,FBgn0004198,FBgn0004396,FBgn0004595,FBgn0004838,FBgn0004880,FBgn0005677,FBgn0010388,FBgn0011206,FBgn0011481,FBgn0011666,FBgn0011766,FBgn0023076,FBgn0024321,FBgn0026411,FBgn0027339,FBgn0028550,FBgn0030479,FBgn0030897,FBgn0033865,FBgn0035016,FBgn0036746,FBgn0037720,FBgn0038063,FBgn0039488,FBgn0085450,FBg…
																				regulation of gene expression	GO:0010468	0.0253233	FBgn0000273,FBgn0000448,FBgn0000490,FBgn0000568,FBgn0001218,FBgn0002643,FBgn0002931,FBgn0003463,FBgn0004198,FBgn0004396,FBgn0004595,FBgn0004838,FBgn0004858,FBgn0004880,FBgn0005677,FBgn0010113,FBgn0011206,FBgn0011481,FBgn0011666,FBgn0011766,FBgn0023076,FBgn0024321,FBgn0026411,FBgn0027339,FBgn0028550,FBgn0030479,FBgn0033865,FBgn0035016,FBgn0036746,FBgn0037720,FBgn0038063,FBgn0039488,FBgn0085450,FBg…
																				regulation of biosynthetic process	GO:0009889	0.0253834	FBgn0000273,FBgn0000448,FBgn0000490,FBgn0000568,FBgn0001122,FBgn0002643,FBgn0002931,FBgn0003463,FBgn0004198,FBgn0004396,FBgn0004595,FBgn0004838,FBgn0004880,FBgn0005677,FBgn0010388,FBgn0011206,FBgn0011481,FBgn0011666,FBgn0011766,FBgn0023076,FBgn0024321,FBgn0026411,FBgn0027339,FBgn0028550,FBgn0030479,FBgn0030897,FBgn0033865,FBgn0035016,FBgn0036746,FBgn0037720,FBgn0038063,FBgn0039488,FBgn0085450,FBg…
																				regulation of nucleobase-containing compound metabolic process	GO:0019219	0.0254187	FBgn0000273,FBgn0000448,FBgn0000490,FBgn0000568,FBgn0001122,FBgn0002643,FBgn0002931,FBgn0003463,FBgn0004198,FBgn0004396,FBgn0004595,FBgn0004838,FBgn0004880,FBgn0005677,FBgn0011481,FBgn0011766,FBgn0023076,FBgn0024321,FBgn0026411,FBgn0027339,FBgn0028550,FBgn0030479,FBgn0030897,FBgn0033865,FBgn0036746,FBgn0037720,FBgn0038063,FBgn0039488,FBgn0085450,FBgn0086675,FBgn0259789,FBgn0260400,FBgn0263930,FBg…
																				wing disc morphogenesis	GO:0007472	0.0265736	FBgn0000273,FBgn0000490,FBgn0001122,FBgn0002643,FBgn0002931,FBgn0003463,FBgn0003984,FBgn0004198,FBgn0036801,FBgn0259789,FBgn0263930,FBgn0264272,FBgn0264442,FBgn0266084
																				negative regulation of cellular process	GO:0048523	0.0269154	FBgn0000017,FBgn0000253,FBgn0000273,FBgn0000308,FBgn0000448,FBgn0000490,FBgn0000568,FBgn0001122,FBgn0002931,FBgn0003463,FBgn0003984,FBgn0004198,FBgn0004244,FBgn0004595,FBgn0004838,FBgn0004880,FBgn0010113,FBgn0011666,FBgn0011766,FBgn0015399,FBgn0023076,FBgn0026411,FBgn0027339,FBgn0030812,FBgn0031191,FBgn0033865,FBgn0036165,FBgn0037720,FBgn0039488,FBgn0041094,FBgn0085450,FBgn0086677,FBgn0260400,FBg…
																				generation of neurons	GO:0048699	0.0274339	FBgn0000017,FBgn0000253,FBgn0000273,FBgn0000308,FBgn0000479,FBgn0000636,FBgn0001122,FBgn0003380,FBgn0003435,FBgn0004198,FBgn0004595,FBgn0004838,FBgn0004858,FBgn0004880,FBgn0005677,FBgn0010113,FBgn0011481,FBgn0011766,FBgn0014163,FBgn0016061,FBgn0027339,FBgn0052423,FBgn0085450,FBgn0086677,FBgn0259984,FBgn0261509,FBgn0263930,FBgn0264006,FBgn0264272,FBgn0264442,FBgn0265487
																				regulation of RNA metabolic process	GO:0051252	0.0277745	FBgn0000273,FBgn0000448,FBgn0000490,FBgn0000568,FBgn0002643,FBgn0002931,FBgn0003463,FBgn0004198,FBgn0004396,FBgn0004595,FBgn0004838,FBgn0004880,FBgn0005677,FBgn0011481,FBgn0011766,FBgn0023076,FBgn0024321,FBgn0026411,FBgn0027339,FBgn0028550,FBgn0030479,FBgn0033865,FBgn0036746,FBgn0037720,FBgn0038063,FBgn0039488,FBgn0085450,FBgn0086675,FBgn0259789,FBgn0260400,FBgn0263930,FBgn0264442,FBgn0265193,FBg…
																				proximal/distal pattern formation, imaginal disc	GO:0007449	0.0282859	FBgn0000490,FBgn0003984,FBgn0005677,FBgn0026411
																				regulation of cellular component biogenesis	GO:0044087	0.0284932	FBgn0000017,FBgn0000256,FBgn0000273,FBgn0000308,FBgn0001122,FBgn0013343,FBgn0013759,FBgn0030479,FBgn0031191,FBgn0038063,FBgn0264006,FBgn0264272,FBgn0265193,FBgn0266084
																				cell development	GO:0048468	0.028656	FBgn0000017,FBgn0000253,FBgn0000256,FBgn0000273,FBgn0000276,FBgn0000308,FBgn0000479,FBgn0000490,FBgn0000568,FBgn0000636,FBgn0001122,FBgn0002643,FBgn0003380,FBgn0003435,FBgn0003463,FBgn0003984,FBgn0004169,FBgn0004198,FBgn0004595,FBgn0004838,FBgn0004880,FBgn0005677,FBgn0010113,FBgn0011481,FBgn0011666,FBgn0011766,FBgn0013343,FBgn0013759,FBgn0014163,FBgn0015399,FBgn0016061,FBgn0027339,FBgn0052423,FBg…
																				single-organism behavior	GO:0044708	0.0287362	FBgn0000017,FBgn0000273,FBgn0000479,FBgn0000636,FBgn0002921,FBgn0003380,FBgn0003435,FBgn0003984,FBgn0004244,FBgn0005585,FBgn0005626,FBgn0013334,FBgn0013759,FBgn0023076,FBgn0030812,FBgn0035016,FBgn0052423,FBgn0085387,FBgn0263995
																				growth	GO:0040007	0.0295086	FBgn0000017,FBgn0000273,FBgn0000308,FBgn0000479,FBgn0000490,FBgn0001122,FBgn0002921,FBgn0003380,FBgn0010113,FBgn0013759,FBgn0026077,FBgn0030054,FBgn0036165,FBgn0038063,FBgn0041094,FBgn0086677,FBgn0259984,FBgn0263930,FBgn0264006
																				positive regulation of biological process	GO:0048518	0.0295096	FBgn0000017,FBgn0000253,FBgn0000256,FBgn0000273,FBgn0000308,FBgn0000448,FBgn0000490,FBgn0002643,FBgn0003380,FBgn0003463,FBgn0003984,FBgn0004240,FBgn0004396,FBgn0004507,FBgn0004595,FBgn0004838,FBgn0010388,FBgn0011481,FBgn0011766,FBgn0013759,FBgn0023076,FBgn0023540,FBgn0025678,FBgn0026411,FBgn0030812,FBgn0030897,FBgn0033593,FBgn0033865,FBgn0035016,FBgn0036746,FBgn0037720,FBgn0038063,FBgn0039494,FBg…
																				regulation of biological quality	GO:0065008	0.0299522	FBgn0000017,FBgn0000253,FBgn0000256,FBgn0000308,FBgn0000490,FBgn0000568,FBgn0001122,FBgn0001186,FBgn0002921,FBgn0003380,FBgn0004169,FBgn0005614,FBgn0011206,FBgn0013334,FBgn0013343,FBgn0013759,FBgn0023076,FBgn0025678,FBgn0026077,FBgn0028550,FBgn0028875,FBgn0030593,FBgn0030897,FBgn0032151,FBgn0034408,FBgn0037153,FBgn0038063,FBgn0053988,FBgn0085387,FBgn0259789,FBgn0259984,FBgn0261836,FBgn0262736,FBg…
																				adult behavior	GO:0030534	0.0311419	FBgn0000273,FBgn0000479,FBgn0002921,FBgn0003380,FBgn0003435,FBgn0005626,FBgn0013759,FBgn0023076,FBgn0052423,FBgn0085387
																				locomotory behavior	GO:0007626	0.0317322	FBgn0000273,FBgn0000479,FBgn0002921,FBgn0003380,FBgn0005585,FBgn0005626,FBgn0013759,FBgn0023076,FBgn0052423,FBgn0053988,FBgn0085387,FBgn0264006
																				tissue morphogenesis	GO:0048729	0.0320169	FBgn0000017,FBgn0000273,FBgn0000308,FBgn0000490,FBgn0001122,FBgn0002643,FBgn0002931,FBgn0003463,FBgn0003984,FBgn0004198,FBgn0005677,FBgn0010113,FBgn0026411,FBgn0031118,FBgn0033033,FBgn0034408,FBgn0036801,FBgn0086677,FBgn0259789,FBgn0263930,FBgn0264272,FBgn0264442,FBgn0266084
																				negative regulation of transcription from RNA polymerase II promoter	GO:0000122	0.0386071	FBgn0000448,FBgn0000568,FBgn0002931,FBgn0004198,FBgn0004595,FBgn0004880,FBgn0011766,FBgn0023076,FBgn0033865,FBgn0264442
																				response to temperature stimulus	GO:0009266	0.0401245	FBgn0000273,FBgn0000479,FBgn0001122,FBgn0001226,FBgn0002921,FBgn0005626,FBgn0023076,FBgn0037163,FBgn0263995,FBgn0265193
																				regulation of cellular macromolecule biosynthetic process	GO:2000112	0.0407863	FBgn0000273,FBgn0000448,FBgn0000490,FBgn0000568,FBgn0002643,FBgn0002931,FBgn0003463,FBgn0004198,FBgn0004396,FBgn0004595,FBgn0004838,FBgn0004880,FBgn0005677,FBgn0011206,FBgn0011481,FBgn0011666,FBgn0011766,FBgn0023076,FBgn0024321,FBgn0026411,FBgn0027339,FBgn0028550,FBgn0030479,FBgn0033865,FBgn0035016,FBgn0036746,FBgn0037720,FBgn0038063,FBgn0039488,FBgn0085450,FBgn0259789,FBgn0260400,FBgn0263930,FBg…
																				sensory perception of sound	GO:0007605	0.0458933	FBgn0000253,FBgn0002921,FBgn0004198,FBgn0005614,FBgn0032946,FBgn0264006
																				anesthesia-resistant memory	GO:0007615	0.0465504	FBgn0000273,FBgn0000479,FBgn0013759
																				morphogenesis of an epithelium	GO:0002009	0.0489426	FBgn0000017,FBgn0000273,FBgn0000308,FBgn0000490,FBgn0001122,FBgn0002643,FBgn0002931,FBgn0003463,FBgn0003984,FBgn0004198,FBgn0005677,FBgn0010113,FBgn0026411,FBgn0031118,FBgn0033033,FBgn0034408,FBgn0036801,FBgn0259789,FBgn0263930,FBgn0264272,FBgn0264442,FBgn0266084
																				proximal/distal pattern formation	GO:0009954	0.049058	FBgn0000490,FBgn0003984,FBgn0005677,FBgn0026411
																				developmental growth involved in morphogenesis	GO:0060560	0.0491822	FBgn0000017,FBgn0000273,FBgn0000308,FBgn0000479,FBgn0003380,FBgn0010113,FBgn0259984
																				regulation of macromolecule biosynthetic process	GO:0010556	0.0492513	FBgn0000273,FBgn0000448,FBgn0000490,FBgn0000568,FBgn0002643,FBgn0002931,FBgn0003463,FBgn0004198,FBgn0004396,FBgn0004595,FBgn0004838,FBgn0004880,FBgn0005677,FBgn0011206,FBgn0011481,FBgn0011666,FBgn0011766,FBgn0023076,FBgn0024321,FBgn0026411,FBgn0027339,FBgn0028550,FBgn0030479,FBgn0033865,FBgn0035016,FBgn0036746,FBgn0037720,FBgn0038063,FBgn0039488,FBgn0085450,FBgn0259789,FBgn0260400,FBgn0263930,FBg…
																				neurogenesis	GO:0022008	0.0494188	FBgn0000017,FBgn0000253,FBgn0000273,FBgn0000308,FBgn0000479,FBgn0000636,FBgn0001122,FBgn0003380,FBgn0003435,FBgn0004198,FBgn0004595,FBgn0004838,FBgn0004858,FBgn0004880,FBgn0005677,FBgn0010113,FBgn0011481,FBgn0011766,FBgn0014163,FBgn0016061,FBgn0027339,FBgn0052423,FBgn0085450,FBgn0086677,FBgn0259984,FBgn0261509,FBgn0263930,FBgn0264006,FBgn0264272,FBgn0264442,FBgn0265487
																				negative regulation of gene expression	GO:0010629	0.0497156	FBgn0000448,FBgn0000490,FBgn0000568,FBgn0001218,FBgn0002931,FBgn0004198,FBgn0004595,FBgn0004838,FBgn0004858,FBgn0004880,FBgn0005677,FBgn0010113,FBgn0011666,FBgn0011766,FBgn0023076,FBgn0026411,FBgn0027339,FBgn0033865,FBgn0039488,FBgn0260400,FBgn0264442

## Sheet: 3FN_VFN
Induced by Mating																				Repressed by mating
Biological Process				Cellular Component				Molecular Function				Protein Domain Enrichment				Pathway Enrichment				Biological Process				Cellular Component				Molecular Function				Protein Domain Enrichment				Pathway Enrichment
GO term	GO Identifier	P-value	Genes	GO term	GO Identifier	P-value	Genes	GO term	GO Identifier	P-value	Genes	Protein Domain	IPR Identifier	P-value	Genes	Pathways	Pathway Identifier	P-value	Genes	GO term	GO Identifier	P-value	Genes	GO term	GO Identifier	P-value	Genes	GO term	GO Identifier	P-value	Genes	Protein Domain	IPR Identifier	P-value	Genes	Pathways	Pathway Identifier	P-value	Genes
cytoplasmic translation	GO:0002181	6.74731e-40	FBgn0000100,FBgn0002590,FBgn0002622,FBgn0002626,FBgn0003274,FBgn0003279,FBgn0003517,FBgn0003941,FBgn0003942,FBgn0004403,FBgn0004867,FBgn0004926,FBgn0005533,FBgn0005593,FBgn0010198,FBgn0010265,FBgn0010408,FBgn0010411,FBgn0011272,FBgn0011284,FBgn0013325,FBgn0014026,FBgn0015288,FBgn0015521,FBgn0015756,FBgn0016726,FBgn0017545,FBgn0017579,FBgn0020910,FBgn0023170,FBgn0024558,FBgn0024733,FBgn0026372,FBg…	cytosolic ribosome	GO:0022626	6.55006e-61	FBgn0000100,FBgn0002590,FBgn0002622,FBgn0002626,FBgn0003274,FBgn0003279,FBgn0003517,FBgn0003941,FBgn0003942,FBgn0004403,FBgn0004867,FBgn0005533,FBgn0005593,FBgn0010198,FBgn0010265,FBgn0010408,FBgn0010411,FBgn0011272,FBgn0011284,FBgn0013325,FBgn0014026,FBgn0015288,FBgn0015521,FBgn0015756,FBgn0016726,FBgn0017545,FBgn0017579,FBgn0020910,FBgn0023170,FBgn0024733,FBgn0026372,FBgn0028697,FBgn0029785,FBg…	structural constituent of ribosome	GO:0003735	1.4473e-40	FBgn0000100,FBgn0002590,FBgn0002622,FBgn0002626,FBgn0003274,FBgn0003279,FBgn0003517,FBgn0003941,FBgn0003942,FBgn0004403,FBgn0004867,FBgn0005533,FBgn0005593,FBgn0010198,FBgn0010265,FBgn0010408,FBgn0010411,FBgn0011272,FBgn0011284,FBgn0013325,FBgn0014026,FBgn0015288,FBgn0015521,FBgn0015756,FBgn0016726,FBgn0017545,FBgn0017579,FBgn0020910,FBgn0023170,FBgn0024733,FBgn0026372,FBgn0028697,FBgn0029785,FBg…	NAD(P)-binding domain	IPR016040	7.76147e-10	FBgn0000055,FBgn0000056,FBgn0001092,FBgn0001258,FBgn0002719,FBgn0004057,FBgn0004654,FBgn0010222,FBgn0011768,FBgn0014455,FBgn0015781,FBgn0020236,FBgn0020385,FBgn0021765,FBgn0022359,FBgn0024289,FBgn0025687,FBgn0028479,FBgn0029648,FBgn0030026,FBgn0030073,FBgn0030731,FBgn0030737,FBgn0030968,FBgn0031360,FBgn0031417,FBgn0031418,FBgn0032350,FBgn0032889,FBgn0033949,FBgn0034390,FBgn0035147,FBgn0035964,FBg…	Formation of a pool of free 40S subunits	R-DME-72689	2.37754e-38	FBgn0000100,FBgn0002590,FBgn0002622,FBgn0002626,FBgn0003274,FBgn0003279,FBgn0003517,FBgn0003941,FBgn0004403,FBgn0004867,FBgn0005533,FBgn0005593,FBgn0010198,FBgn0010265,FBgn0010408,FBgn0010411,FBgn0011272,FBgn0011284,FBgn0013325,FBgn0014026,FBgn0015288,FBgn0015521,FBgn0015756,FBgn0015834,FBgn0016726,FBgn0017545,FBgn0017579,FBgn0020910,FBgn0022023,FBgn0023170,FBgn0024733,FBgn0025582,FBgn0026372,FBg…	system development	GO:0048731	5.27738e-26	FBgn0000017,FBgn0000044,FBgn0000108,FBgn0000179,FBgn0000253,FBgn0000259,FBgn0000273,FBgn0000276,FBgn0000289,FBgn0000308,FBgn0000439,FBgn0000448,FBgn0000479,FBgn0000489,FBgn0000490,FBgn0000535,FBgn0000546,FBgn0000633,FBgn0000636,FBgn0000659,FBgn0001078,FBgn0001122,FBgn0001138,FBgn0001139,FBgn0001235,FBgn0001323,FBgn0001404,FBgn0001994,FBgn0002306,FBgn0002521,FBgn0002921,FBgn0003165,FBgn0003209,FBg…	cell periphery	GO:0071944	2.84465e-17	FBgn0000017,FBgn0000038,FBgn0000044,FBgn0000108,FBgn0000253,FBgn0000273,FBgn0000308,FBgn0000535,FBgn0000636,FBgn0001122,FBgn0002306,FBgn0002921,FBgn0003209,FBgn0003218,FBgn0003285,FBgn0003380,FBgn0003386,FBgn0003463,FBgn0003475,FBgn0004108,FBgn0004242,FBgn0004244,FBgn0004369,FBgn0004370,FBgn0004397,FBgn0004435,FBgn0004595,FBgn0004635,FBgn0004910,FBgn0005614,FBgn0005775,FBgn0010238,FBgn0010300,FBg…	protein binding	GO:0005515	2.13672e-08	FBgn0000017,FBgn0000108,FBgn0000179,FBgn0000253,FBgn0000259,FBgn0000273,FBgn0000289,FBgn0000308,FBgn0000439,FBgn0000448,FBgn0000489,FBgn0000490,FBgn0000546,FBgn0000636,FBgn0000659,FBgn0001078,FBgn0001122,FBgn0001138,FBgn0001139,FBgn0001235,FBgn0001994,FBgn0002521,FBgn0002723,FBgn0003285,FBgn0003463,FBgn0003475,FBgn0003896,FBgn0003997,FBgn0004102,FBgn0004117,FBgn0004242,FBgn0004397,FBgn0004435,FBg…	Immunoglobulin-like fold	IPR013783	1.53358e-15	FBgn0000633,FBgn0000636,FBgn0002306,FBgn0003285,FBgn0004369,FBgn0004370,FBgn0005666,FBgn0010238,FBgn0010473,FBgn0015399,FBgn0015400,FBgn0015609,FBgn0017590,FBgn0024189,FBgn0027499,FBgn0028369,FBgn0029082,FBgn0029974,FBgn0030505,FBgn0034072,FBgn0034286,FBgn0036454,FBgn0036862,FBgn0037240,FBgn0037736,FBgn0038498,FBgn0039584,FBgn0040726,FBgn0040823,FBgn0041097,FBgn0051708,FBgn0052057,FBgn0052311,FBg…	Neuronal System	R-DME-112316	6.43441e-09	FBgn0000038,FBgn0000253,FBgn0000535,FBgn0001142,FBgn0003380,FBgn0003386,FBgn0004242,FBgn0004516,FBgn0005586,FBgn0013342,FBgn0013759,FBgn0020386,FBgn0028875,FBgn0029761,FBgn0031424,FBgn0032151,FBgn0083963,FBgn0085397,FBgn0086778,FBgn0260446,FBgn0260964,FBgn0261625,FBgn0263397,FBgn0265784,FBgn0266347,FBgn0270928
carboxylic acid metabolic process	GO:0019752	1.63357e-38	FBgn0000565,FBgn0000566,FBgn0001092,FBgn0001124,FBgn0001125,FBgn0001187,FBgn0001208,FBgn0001248,FBgn0001258,FBgn0002069,FBgn0002719,FBgn0003074,FBgn0003189,FBgn0003308,FBgn0003965,FBgn0005674,FBgn0010222,FBgn0010516,FBgn0010591,FBgn0011770,FBgn0012034,FBgn0012036,FBgn0013307,FBgn0014031,FBgn0014427,FBgn0014455,FBgn0015781,FBgn0020236,FBgn0020385,FBgn0021765,FBgn0022774,FBgn0023129,FBgn0023507,FBg…	cytosolic part	GO:0044445	5.35267e-55	FBgn0000100,FBgn0002590,FBgn0002622,FBgn0002626,FBgn0003274,FBgn0003279,FBgn0003517,FBgn0003676,FBgn0003941,FBgn0003942,FBgn0004403,FBgn0004852,FBgn0004867,FBgn0004926,FBgn0005533,FBgn0005593,FBgn0010198,FBgn0010265,FBgn0010408,FBgn0010411,FBgn0011272,FBgn0011284,FBgn0013325,FBgn0014026,FBgn0015019,FBgn0015288,FBgn0015521,FBgn0015756,FBgn0016726,FBgn0017545,FBgn0017579,FBgn0020910,FBgn0022710,FBg…	catalytic activity	GO:0003824	2.89516e-19	FBgn0000052,FBgn0000053,FBgn0000055,FBgn0000056,FBgn0000150,FBgn0000239,FBgn0000406,FBgn0000447,FBgn0000455,FBgn0000477,FBgn0000536,FBgn0000559,FBgn0000565,FBgn0000566,FBgn0000592,FBgn0000615,FBgn0001092,FBgn0001114,FBgn0001124,FBgn0001125,FBgn0001187,FBgn0001208,FBgn0001248,FBgn0001258,FBgn0002022,FBgn0002069,FBgn0002284,FBgn0002622,FBgn0002719,FBgn0002905,FBgn0002930,FBgn0002936,FBgn0003062,FBg…	Rossmann-like alpha/beta/alpha sandwich fold	IPR014729	3.01926e-05	FBgn0000239,FBgn0005674,FBgn0010516,FBgn0020389,FBgn0026565,FBgn0027079,FBgn0027080,FBgn0027086,FBgn0027090,FBgn0027091,FBgn0027093,FBgn0030431,FBgn0032482,FBgn0034401,FBgn0035632,FBgn0039697,FBgn0270926	L13a-mediated translational silencing of Ceruloplasmin expression	R-DME-156827	1.57908e-36	FBgn0000100,FBgn0002590,FBgn0002622,FBgn0002626,FBgn0003274,FBgn0003279,FBgn0003517,FBgn0003941,FBgn0004403,FBgn0004867,FBgn0004926,FBgn0005533,FBgn0005593,FBgn0010198,FBgn0010265,FBgn0010408,FBgn0010411,FBgn0011272,FBgn0011284,FBgn0013325,FBgn0014026,FBgn0015288,FBgn0015521,FBgn0015756,FBgn0015834,FBgn0016726,FBgn0017545,FBgn0017579,FBgn0020910,FBgn0022023,FBgn0023170,FBgn0024733,FBgn0025582,FBg…	single-multicellular organism process	GO:0044707	9.69941e-26	FBgn0000017,FBgn0000044,FBgn0000108,FBgn0000179,FBgn0000253,FBgn0000259,FBgn0000273,FBgn0000276,FBgn0000289,FBgn0000308,FBgn0000439,FBgn0000448,FBgn0000479,FBgn0000489,FBgn0000490,FBgn0000535,FBgn0000546,FBgn0000568,FBgn0000633,FBgn0000636,FBgn0000659,FBgn0000810,FBgn0001078,FBgn0001122,FBgn0001138,FBgn0001139,FBgn0001235,FBgn0001323,FBgn0001404,FBgn0001994,FBgn0002306,FBgn0002521,FBgn0002921,FBg…	plasma membrane	GO:0005886	1.03786e-12	FBgn0000017,FBgn0000038,FBgn0000044,FBgn0000108,FBgn0000253,FBgn0000273,FBgn0000535,FBgn0000636,FBgn0001122,FBgn0002306,FBgn0002921,FBgn0003209,FBgn0003218,FBgn0003285,FBgn0003380,FBgn0003386,FBgn0003463,FBgn0004108,FBgn0004242,FBgn0004244,FBgn0004369,FBgn0004370,FBgn0004397,FBgn0004435,FBgn0004595,FBgn0004635,FBgn0004910,FBgn0005614,FBgn0005775,FBgn0010238,FBgn0010415,FBgn0010473,FBgn0011259,FBg…	nucleic acid binding transcription factor activity	GO:0001071	6.5232e-07	FBgn0000179,FBgn0000273,FBgn0000289,FBgn0000439,FBgn0000448,FBgn0000546,FBgn0000568,FBgn0000659,FBgn0001078,FBgn0001138,FBgn0001235,FBgn0001323,FBgn0001994,FBgn0002723,FBgn0003896,FBgn0004102,FBgn0004595,FBgn0004618,FBgn0004795,FBgn0004865,FBgn0011481,FBgn0011766,FBgn0013799,FBgn0015664,FBgn0022238,FBgn0023215,FBgn0028550,FBgn0029939,FBgn0030505,FBgn0032202,FBgn0036746,FBgn0037698,FBgn0038063,FBg…	Immunoglobulin-like domain	IPR007110	8.17836e-15	FBgn0000633,FBgn0000636,FBgn0003285,FBgn0004369,FBgn0005666,FBgn0010238,FBgn0010473,FBgn0015399,FBgn0015400,FBgn0017590,FBgn0024189,FBgn0028369,FBgn0029082,FBgn0029974,FBgn0034286,FBgn0036454,FBgn0037240,FBgn0037736,FBgn0039584,FBgn0040726,FBgn0040823,FBgn0041097,FBgn0051708,FBgn0052057,FBgn0052311,FBgn0052791,FBgn0053179,FBgn0053481,FBgn0085382,FBgn0259213,FBgn0260995,FBgn0261822,FBgn0262509,FBg…	Transmission across Chemical Synapses	R-DME-112315	9.9396e-07	FBgn0000038,FBgn0000253,FBgn0001142,FBgn0004242,FBgn0004516,FBgn0005586,FBgn0013342,FBgn0013759,FBgn0020386,FBgn0028875,FBgn0031424,FBgn0032151,FBgn0086778,FBgn0260446,FBgn0260964,FBgn0261625,FBgn0265784,FBgn0266347,FBgn0270928
organic acid metabolic process	GO:0006082	1.91286e-37	FBgn0000565,FBgn0000566,FBgn0001092,FBgn0001124,FBgn0001125,FBgn0001187,FBgn0001208,FBgn0001248,FBgn0001258,FBgn0002069,FBgn0002719,FBgn0003074,FBgn0003189,FBgn0003308,FBgn0003965,FBgn0005674,FBgn0010222,FBgn0010516,FBgn0010591,FBgn0011770,FBgn0012034,FBgn0012036,FBgn0013307,FBgn0014031,FBgn0014427,FBgn0014455,FBgn0015781,FBgn0020236,FBgn0020251,FBgn0020385,FBgn0021765,FBgn0022774,FBgn0023129,FBg…	ribosome	GO:0005840	4.07112e-48	FBgn0000100,FBgn0002590,FBgn0002622,FBgn0002626,FBgn0003274,FBgn0003279,FBgn0003517,FBgn0003941,FBgn0003942,FBgn0004403,FBgn0004867,FBgn0005533,FBgn0005593,FBgn0010198,FBgn0010265,FBgn0010408,FBgn0010411,FBgn0011272,FBgn0011284,FBgn0013325,FBgn0014026,FBgn0015288,FBgn0015521,FBgn0015756,FBgn0016726,FBgn0017545,FBgn0017579,FBgn0020910,FBgn0023170,FBgn0024733,FBgn0026372,FBgn0028697,FBgn0029785,FBg…	oxidoreductase activity	GO:0016491	7.99199e-19	FBgn0000055,FBgn0000056,FBgn0000406,FBgn0000447,FBgn0000565,FBgn0001092,FBgn0001187,FBgn0001208,FBgn0001248,FBgn0001258,FBgn0002719,FBgn0003074,FBgn0003204,FBgn0003308,FBgn0003965,FBgn0004057,FBgn0004654,FBgn0005670,FBgn0010222,FBgn0010226,FBgn0010516,FBgn0011703,FBgn0011768,FBgn0012036,FBgn0013773,FBgn0014002,FBgn0014469,FBgn0014903,FBgn0015039,FBgn0015040,FBgn0015781,FBgn0019957,FBgn0020385,FBg…	Pyridoxal phosphate-dependent transferase, subdomain 2	IPR015422	0.000187995	FBgn0000566,FBgn0001124,FBgn0001125,FBgn0010591,FBgn0014031,FBgn0014427,FBgn0022774,FBgn0029823,FBgn0030478,FBgn0036208,FBgn0036975,FBgn0037801,FBgn0037955,FBgn0039094	Ribosome	3010	1.7678e-36	FBgn0000100,FBgn0002590,FBgn0002622,FBgn0002626,FBgn0003274,FBgn0003279,FBgn0003517,FBgn0003941,FBgn0003942,FBgn0004403,FBgn0004867,FBgn0005533,FBgn0005593,FBgn0010198,FBgn0010265,FBgn0010408,FBgn0010411,FBgn0011272,FBgn0011284,FBgn0013325,FBgn0014026,FBgn0015288,FBgn0015521,FBgn0015756,FBgn0016726,FBgn0017545,FBgn0017579,FBgn0020910,FBgn0023170,FBgn0024733,FBgn0026372,FBgn0028697,FBgn0029785,FBg…	biological regulation	GO:0065007	1.0834e-21	FBgn0000017,FBgn0000038,FBgn0000044,FBgn0000108,FBgn0000179,FBgn0000253,FBgn0000259,FBgn0000273,FBgn0000276,FBgn0000289,FBgn0000308,FBgn0000439,FBgn0000448,FBgn0000479,FBgn0000490,FBgn0000535,FBgn0000546,FBgn0000568,FBgn0000659,FBgn0000810,FBgn0001078,FBgn0001122,FBgn0001138,FBgn0001139,FBgn0001186,FBgn0001235,FBgn0001323,FBgn0001404,FBgn0001994,FBgn0002521,FBgn0002723,FBgn0002868,FBgn0002921,FBg…	synapse	GO:0045202	1.05794e-10	FBgn0000038,FBgn0000636,FBgn0003165,FBgn0004242,FBgn0004575,FBgn0004580,FBgn0005586,FBgn0005775,FBgn0010415,FBgn0011288,FBgn0011582,FBgn0013334,FBgn0013342,FBgn0013343,FBgn0013759,FBgn0014010,FBgn0020386,FBgn0025726,FBgn0028397,FBgn0028400,FBgn0028408,FBgn0028582,FBgn0028875,FBgn0030897,FBgn0031424,FBgn0032151,FBgn0032901,FBgn0033926,FBgn0034072,FBgn0035756,FBgn0038659,FBgn0039914,FBgn0040505,FBg…	transcription factor activity, sequence-specific DNA binding	GO:0003700	6.5232e-07	FBgn0000179,FBgn0000273,FBgn0000289,FBgn0000439,FBgn0000448,FBgn0000546,FBgn0000568,FBgn0000659,FBgn0001078,FBgn0001138,FBgn0001235,FBgn0001323,FBgn0001994,FBgn0002723,FBgn0003896,FBgn0004102,FBgn0004595,FBgn0004618,FBgn0004795,FBgn0004865,FBgn0011481,FBgn0011766,FBgn0013799,FBgn0015664,FBgn0022238,FBgn0023215,FBgn0028550,FBgn0029939,FBgn0030505,FBgn0032202,FBgn0036746,FBgn0037698,FBgn0038063,FBg…	Immunoglobulin subtype 2	IPR003598	1.96209e-14	FBgn0000633,FBgn0003285,FBgn0005666,FBgn0010238,FBgn0010473,FBgn0015399,FBgn0015400,FBgn0017590,FBgn0024189,FBgn0028369,FBgn0029082,FBgn0029974,FBgn0034286,FBgn0036454,FBgn0037240,FBgn0037736,FBgn0040726,FBgn0040823,FBgn0041097,FBgn0051708,FBgn0052057,FBgn0052311,FBgn0052791,FBgn0053481,FBgn0085382,FBgn0259213,FBgn0260995,FBgn0261822,FBgn0262509,FBgn0264975,FBgn0265296,FBgn0266801	Neurotransmitter release cycle	R-DME-112310	0.000150486	FBgn0004242,FBgn0004516,FBgn0005586,FBgn0013342,FBgn0013759,FBgn0031424,FBgn0260964,FBgn0261625,FBgn0270928
oxoacid metabolic process	GO:0043436	1.91286e-37	FBgn0000565,FBgn0000566,FBgn0001092,FBgn0001124,FBgn0001125,FBgn0001187,FBgn0001208,FBgn0001248,FBgn0001258,FBgn0002069,FBgn0002719,FBgn0003074,FBgn0003189,FBgn0003308,FBgn0003965,FBgn0005674,FBgn0010222,FBgn0010516,FBgn0010591,FBgn0011770,FBgn0012034,FBgn0012036,FBgn0013307,FBgn0014031,FBgn0014427,FBgn0014455,FBgn0015781,FBgn0020236,FBgn0020251,FBgn0020385,FBgn0021765,FBgn0022774,FBgn0023129,FBg…	cytoplasm	GO:0005737	6.47029e-31	FBgn0000052,FBgn0000053,FBgn0000055,FBgn0000100,FBgn0000330,FBgn0000406,FBgn0000447,FBgn0000536,FBgn0000559,FBgn0000566,FBgn0000615,FBgn0000996,FBgn0001124,FBgn0001125,FBgn0001187,FBgn0001220,FBgn0001223,FBgn0001248,FBgn0001258,FBgn0002022,FBgn0002031,FBgn0002069,FBgn0002590,FBgn0002622,FBgn0002626,FBgn0002719,FBgn0002780,FBgn0002905,FBgn0002936,FBgn0003067,FBgn0003068,FBgn0003076,FBgn0003116,FBg…	structural molecule activity	GO:0005198	1.0632e-14	FBgn0000100,FBgn0002590,FBgn0002622,FBgn0002626,FBgn0003274,FBgn0003279,FBgn0003517,FBgn0003890,FBgn0003941,FBgn0003942,FBgn0004403,FBgn0004867,FBgn0005533,FBgn0005593,FBgn0005664,FBgn0008635,FBgn0010198,FBgn0010265,FBgn0010408,FBgn0010411,FBgn0011272,FBgn0011284,FBgn0013325,FBgn0014026,FBgn0015288,FBgn0015521,FBgn0015756,FBgn0016726,FBgn0017545,FBgn0017579,FBgn0020910,FBgn0023170,FBgn0024509,FBg…	Pyridoxal phosphate-dependent transferase	IPR015424	0.000355524	FBgn0000566,FBgn0001124,FBgn0001125,FBgn0010591,FBgn0014031,FBgn0014427,FBgn0022774,FBgn0029823,FBgn0030478,FBgn0036208,FBgn0036975,FBgn0037801,FBgn0037955,FBgn0039094	SRP-dependent cotranslational protein targeting to membrane	R-DME-1799339	4.11745e-34	FBgn0000100,FBgn0002590,FBgn0002622,FBgn0002626,FBgn0003274,FBgn0003279,FBgn0003517,FBgn0003941,FBgn0004403,FBgn0004867,FBgn0005533,FBgn0005593,FBgn0010198,FBgn0010265,FBgn0010408,FBgn0010411,FBgn0010747,FBgn0011272,FBgn0011284,FBgn0013325,FBgn0014026,FBgn0015288,FBgn0015521,FBgn0015756,FBgn0016726,FBgn0017545,FBgn0017579,FBgn0020910,FBgn0023170,FBgn0024733,FBgn0026372,FBgn0028697,FBgn0029785,FBg…	nervous system development	GO:0007399	1.10233e-21	FBgn0000017,FBgn0000108,FBgn0000253,FBgn0000259,FBgn0000273,FBgn0000308,FBgn0000448,FBgn0000479,FBgn0000535,FBgn0000546,FBgn0000636,FBgn0001078,FBgn0001122,FBgn0001138,FBgn0001139,FBgn0001235,FBgn0001404,FBgn0002306,FBgn0002521,FBgn0002921,FBgn0003165,FBgn0003209,FBgn0003380,FBgn0003435,FBgn0003896,FBgn0003997,FBgn0004102,FBgn0004108,FBgn0004198,FBgn0004369,FBgn0004370,FBgn0004395,FBgn0004397,FBg…	plasma membrane part	GO:0044459	5.8644e-09	FBgn0000017,FBgn0000038,FBgn0000253,FBgn0000273,FBgn0000308,FBgn0000490,FBgn0000535,FBgn0000546,FBgn0000636,FBgn0001122,FBgn0002306,FBgn0002921,FBgn0003218,FBgn0003380,FBgn0003386,FBgn0004108,FBgn0004244,FBgn0004369,FBgn0004370,FBgn0004397,FBgn0004435,FBgn0005614,FBgn0010113,FBgn0010473,FBgn0011582,FBgn0015399,FBgn0015400,FBgn0015609,FBgn0015777,FBgn0015872,FBgn0017590,FBgn0024941,FBgn0025391,FBg…	transcription regulatory region sequence-specific DNA binding	GO:0000976	7.24698e-07	FBgn0000179,FBgn0000289,FBgn0000439,FBgn0000448,FBgn0000546,FBgn0000568,FBgn0000659,FBgn0001078,FBgn0001138,FBgn0001235,FBgn0001323,FBgn0001994,FBgn0002521,FBgn0002723,FBgn0003896,FBgn0004102,FBgn0004198,FBgn0004595,FBgn0004618,FBgn0004795,FBgn0004865,FBgn0011481,FBgn0011766,FBgn0013799,FBgn0015664,FBgn0022238,FBgn0023215,FBgn0028550,FBgn0029939,FBgn0030505,FBgn0032202,FBgn0037698,FBgn0038063,FBg…	Immunoglobulin subtype	IPR003599	3.58965e-14	FBgn0000633,FBgn0003285,FBgn0005666,FBgn0010238,FBgn0010473,FBgn0015399,FBgn0015400,FBgn0017590,FBgn0024189,FBgn0028369,FBgn0029082,FBgn0029974,FBgn0034286,FBgn0036454,FBgn0037240,FBgn0037736,FBgn0040726,FBgn0040823,FBgn0041097,FBgn0051708,FBgn0052057,FBgn0052311,FBgn0052791,FBgn0053481,FBgn0085382,FBgn0259213,FBgn0260995,FBgn0261822,FBgn0262509,FBgn0264975,FBgn0265296,FBgn0266801	Signaling by GPCR	R-DME-372790	0.00303107	FBgn0000253,FBgn0000273,FBgn0000479,FBgn0001122,FBgn0004168,FBgn0004435,FBgn0011582,FBgn0014135,FBgn0020386,FBgn0020767,FBgn0022382,FBgn0027492,FBgn0028743,FBgn0033438,FBgn0036260,FBgn0036844,FBgn0038063,FBgn0038980,FBgn0051140,FBgn0052683,FBgn0085413,FBgn0259680,FBgn0260446,FBgn0262738,FBgn0265784
single-organism metabolic process	GO:0044710	2.87886e-34	FBgn0000052,FBgn0000053,FBgn0000055,FBgn0000056,FBgn0000150,FBgn0000239,FBgn0000330,FBgn0000406,FBgn0000447,FBgn0000536,FBgn0000565,FBgn0000566,FBgn0000592,FBgn0000996,FBgn0001092,FBgn0001124,FBgn0001125,FBgn0001187,FBgn0001208,FBgn0001220,FBgn0001248,FBgn0001258,FBgn0002069,FBgn0002719,FBgn0002936,FBgn0003067,FBgn0003074,FBgn0003076,FBgn0003116,FBgn0003189,FBgn0003204,FBgn0003308,FBgn0003507,FBg…	ribosomal subunit	GO:0044391	8.28716e-31	FBgn0000100,FBgn0002590,FBgn0002622,FBgn0002626,FBgn0003274,FBgn0003279,FBgn0003517,FBgn0003941,FBgn0003942,FBgn0004403,FBgn0004867,FBgn0004926,FBgn0005533,FBgn0005593,FBgn0010198,FBgn0010265,FBgn0010408,FBgn0010411,FBgn0011272,FBgn0011284,FBgn0013325,FBgn0014026,FBgn0015288,FBgn0015521,FBgn0015756,FBgn0016726,FBgn0017545,FBgn0017579,FBgn0020910,FBgn0023170,FBgn0024733,FBgn0026372,FBgn0028697,FBg…	ligase activity	GO:0016874	2.42065e-09	FBgn0000052,FBgn0000053,FBgn0000239,FBgn0000565,FBgn0002069,FBgn0003189,FBgn0005674,FBgn0010516,FBgn0012034,FBgn0020385,FBgn0020513,FBgn0026565,FBgn0027079,FBgn0027080,FBgn0027081,FBgn0027084,FBgn0027086,FBgn0027087,FBgn0027088,FBgn0027090,FBgn0027091,FBgn0027093,FBgn0027094,FBgn0027348,FBgn0027493,FBgn0027572,FBgn0027580,FBgn0028479,FBgn0028519,FBgn0029176,FBgn0029969,FBgn0030305,FBgn0030407,FBg…	Cytochrome P450, conserved site	IPR017972	0.000385755	FBgn0005670,FBgn0013773,FBgn0014469,FBgn0015039,FBgn0015040,FBgn0025454,FBgn0030339,FBgn0031126,FBgn0031432,FBgn0031689,FBgn0031693,FBgn0033065,FBgn0033775,FBgn0034756,FBgn0035344,FBgn0036806,FBgn0037817,FBgn0038194,FBgn0038681,FBgn0041337,FBgn0050489,FBgn0053503	Eukaryotic Translation Initiation	R-DME-72613	7.11089e-34	FBgn0000100,FBgn0002590,FBgn0002622,FBgn0002626,FBgn0003274,FBgn0003279,FBgn0003517,FBgn0003941,FBgn0004403,FBgn0004867,FBgn0004926,FBgn0005533,FBgn0005593,FBgn0010198,FBgn0010265,FBgn0010408,FBgn0010411,FBgn0011272,FBgn0011284,FBgn0013325,FBgn0014026,FBgn0015288,FBgn0015521,FBgn0015756,FBgn0015834,FBgn0016726,FBgn0017545,FBgn0017579,FBgn0020910,FBgn0022023,FBgn0023170,FBgn0024733,FBgn0025582,FBg…	multicellular organism development	GO:0007275	2.5999e-21	FBgn0000017,FBgn0000044,FBgn0000108,FBgn0000179,FBgn0000253,FBgn0000259,FBgn0000273,FBgn0000276,FBgn0000289,FBgn0000308,FBgn0000439,FBgn0000448,FBgn0000479,FBgn0000489,FBgn0000490,FBgn0000535,FBgn0000546,FBgn0000568,FBgn0000633,FBgn0000636,FBgn0000659,FBgn0000810,FBgn0001078,FBgn0001122,FBgn0001138,FBgn0001139,FBgn0001235,FBgn0001323,FBgn0001404,FBgn0001994,FBgn0002306,FBgn0002521,FBgn0002921,FBg…	synapse part	GO:0044456	1.29321e-08	FBgn0000038,FBgn0003165,FBgn0004242,FBgn0004575,FBgn0004580,FBgn0005586,FBgn0011288,FBgn0011582,FBgn0013342,FBgn0013343,FBgn0013759,FBgn0014010,FBgn0025726,FBgn0028397,FBgn0028400,FBgn0028408,FBgn0028582,FBgn0028875,FBgn0030897,FBgn0031424,FBgn0032151,FBgn0032901,FBgn0035756,FBgn0038659,FBgn0039914,FBgn0040505,FBgn0040752,FBgn0041605,FBgn0053547,FBgn0083228,FBgn0083963,FBgn0086677,FBgn0086778,FBg…	sequence-specific double-stranded DNA binding	GO:1990837	1.35159e-06	FBgn0000179,FBgn0000289,FBgn0000439,FBgn0000448,FBgn0000546,FBgn0000568,FBgn0000659,FBgn0001078,FBgn0001138,FBgn0001235,FBgn0001323,FBgn0001994,FBgn0002521,FBgn0002723,FBgn0003896,FBgn0004102,FBgn0004198,FBgn0004595,FBgn0004618,FBgn0004795,FBgn0004865,FBgn0011481,FBgn0011766,FBgn0013799,FBgn0015664,FBgn0022238,FBgn0023215,FBgn0028550,FBgn0029939,FBgn0030505,FBgn0032202,FBgn0037698,FBgn0038063,FBg…	WD40/YVTN repeat-like-containing domain	IPR015943	2.76321e-09	FBgn0000479,FBgn0000810,FBgn0001139,FBgn0003165,FBgn0003209,FBgn0004198,FBgn0004369,FBgn0004595,FBgn0004865,FBgn0010113,FBgn0010313,FBgn0011224,FBgn0011259,FBgn0011766,FBgn0016977,FBgn0026160,FBgn0027339,FBgn0029814,FBgn0029895,FBgn0030034,FBgn0030505,FBgn0030617,FBgn0031306,FBgn0032188,FBgn0033403,FBgn0035497,FBgn0035719,FBgn0035756,FBgn0036746,FBgn0037525,FBgn0039808,FBgn0051973,FBgn0052062,FBg…	Signal Transduction	R-DME-162582	0.00365224	FBgn0000017,FBgn0000044,FBgn0000046,FBgn0000253,FBgn0000273,FBgn0000479,FBgn0000490,FBgn0001122,FBgn0001139,FBgn0003463,FBgn0004168,FBgn0004435,FBgn0011224,FBgn0011582,FBgn0011817,FBgn0014135,FBgn0015024,FBgn0015777,FBgn0020386,FBgn0020767,FBgn0022382,FBgn0022987,FBgn0026375,FBgn0027492,FBgn0028494,FBgn0028582,FBgn0028743,FBgn0030505,FBgn0030976,FBgn0032946,FBgn0033438,FBgn0034789,FBgn0036260,FBg…
small molecule metabolic process	GO:0044281	1.60854e-29	FBgn0000052,FBgn0000053,FBgn0000055,FBgn0000150,FBgn0000239,FBgn0000447,FBgn0000565,FBgn0000566,FBgn0001092,FBgn0001124,FBgn0001125,FBgn0001187,FBgn0001208,FBgn0001248,FBgn0001258,FBgn0002069,FBgn0002719,FBgn0003067,FBgn0003074,FBgn0003076,FBgn0003116,FBgn0003189,FBgn0003204,FBgn0003308,FBgn0003507,FBgn0003731,FBgn0003965,FBgn0004057,FBgn0004654,FBgn0004852,FBgn0005674,FBgn0010217,FBgn0010222,FBg…	cytosolic large ribosomal subunit	GO:0022625	1.07961e-29	FBgn0000100,FBgn0002626,FBgn0003274,FBgn0003279,FBgn0003941,FBgn0005593,FBgn0011272,FBgn0013325,FBgn0014026,FBgn0015288,FBgn0015756,FBgn0016726,FBgn0017579,FBgn0020910,FBgn0023170,FBgn0024733,FBgn0026372,FBgn0028697,FBgn0029785,FBgn0029897,FBgn0030616,FBgn0030878,FBgn0031980,FBgn0032050,FBgn0032404,FBgn0032518,FBgn0032987,FBgn0034968,FBgn0035422,FBgn0035753,FBgn0036213,FBgn0036825,FBgn0037328,FBg…	cofactor binding	GO:0048037	1.8462e-08	FBgn0000056,FBgn0000566,FBgn0001092,FBgn0001124,FBgn0001125,FBgn0001248,FBgn0002719,FBgn0003308,FBgn0004057,FBgn0010387,FBgn0010516,FBgn0010591,FBgn0014455,FBgn0020236,FBgn0022774,FBgn0023507,FBgn0023537,FBgn0025456,FBgn0027572,FBgn0029823,FBgn0030478,FBgn0030737,FBgn0031824,FBgn0031860,FBgn0032350,FBgn0032889,FBgn0033079,FBgn0033543,FBgn0033949,FBgn0034390,FBgn0034488,FBgn0034628,FBgn0034629,FBg…	Cytochrome P450, E-class, group I	IPR002401	0.000879159	FBgn0005670,FBgn0013773,FBgn0014469,FBgn0015040,FBgn0025454,FBgn0030339,FBgn0031126,FBgn0031432,FBgn0031689,FBgn0031693,FBgn0033065,FBgn0033775,FBgn0034756,FBgn0035344,FBgn0036806,FBgn0037817,FBgn0038194,FBgn0038681,FBgn0041337,FBgn0050489,FBgn0053503	Cap-dependent Translation Initiation	R-DME-72737	7.11089e-34	FBgn0000100,FBgn0002590,FBgn0002622,FBgn0002626,FBgn0003274,FBgn0003279,FBgn0003517,FBgn0003941,FBgn0004403,FBgn0004867,FBgn0004926,FBgn0005533,FBgn0005593,FBgn0010198,FBgn0010265,FBgn0010408,FBgn0010411,FBgn0011272,FBgn0011284,FBgn0013325,FBgn0014026,FBgn0015288,FBgn0015521,FBgn0015756,FBgn0015834,FBgn0016726,FBgn0017545,FBgn0017579,FBgn0020910,FBgn0022023,FBgn0023170,FBgn0024733,FBgn0025582,FBg…	developmental process	GO:0032502	7.16436e-21	FBgn0000017,FBgn0000044,FBgn0000108,FBgn0000179,FBgn0000253,FBgn0000259,FBgn0000273,FBgn0000276,FBgn0000289,FBgn0000308,FBgn0000439,FBgn0000448,FBgn0000479,FBgn0000489,FBgn0000490,FBgn0000535,FBgn0000546,FBgn0000568,FBgn0000633,FBgn0000636,FBgn0000659,FBgn0000810,FBgn0001078,FBgn0001122,FBgn0001138,FBgn0001139,FBgn0001235,FBgn0001323,FBgn0001404,FBgn0001994,FBgn0002306,FBgn0002521,FBgn0002723,FBg…	neuron part	GO:0097458	6.86356e-08	FBgn0000017,FBgn0000273,FBgn0000308,FBgn0000546,FBgn0003165,FBgn0004242,FBgn0004244,FBgn0004369,FBgn0004370,FBgn0004575,FBgn0004580,FBgn0005586,FBgn0005614,FBgn0005775,FBgn0010113,FBgn0010300,FBgn0011206,FBgn0011288,FBgn0011582,FBgn0013342,FBgn0013343,FBgn0013759,FBgn0014010,FBgn0015609,FBgn0015774,FBgn0015777,FBgn0025726,FBgn0028400,FBgn0028582,FBgn0029761,FBgn0030897,FBgn0031424,FBgn0032840,FBg…	receptor activity	GO:0004872	1.52368e-06	FBgn0000038,FBgn0000253,FBgn0000448,FBgn0000535,FBgn0000546,FBgn0000568,FBgn0000636,FBgn0001078,FBgn0001122,FBgn0002306,FBgn0002723,FBgn0003218,FBgn0004168,FBgn0004244,FBgn0004369,FBgn0004370,FBgn0004435,FBgn0004569,FBgn0004865,FBgn0011582,FBgn0015399,FBgn0015609,FBgn0023178,FBgn0027109,FBgn0028875,FBgn0029761,FBgn0029814,FBgn0032048,FBgn0032151,FBgn0032840,FBgn0035023,FBgn0035092,FBgn0036260,FBg…	Immunoglobulin I-set	IPR013098	5.54547e-09	FBgn0003285,FBgn0005666,FBgn0010238,FBgn0010473,FBgn0015399,FBgn0017590,FBgn0024189,FBgn0028369,FBgn0029082,FBgn0029974,FBgn0040726,FBgn0040823,FBgn0041097,FBgn0051708,FBgn0052057,FBgn0052311,FBgn0052791,FBgn0085382,FBgn0260995,FBgn0264975,FBgn0265296	Acetylcholine binding and downstream events	R-DME-181431	0.00431911	FBgn0000038,FBgn0028875,FBgn0032151,FBgn0086778,FBgn0266347
organonitrogen compound biosynthetic process	GO:1901566	1.56075e-28	FBgn0000052,FBgn0000053,FBgn0000100,FBgn0000150,FBgn0000239,FBgn0000447,FBgn0000536,FBgn0000559,FBgn0000566,FBgn0001124,FBgn0001125,FBgn0002069,FBgn0002590,FBgn0002622,FBgn0002626,FBgn0002936,FBgn0003189,FBgn0003204,FBgn0003274,FBgn0003279,FBgn0003517,FBgn0003941,FBgn0003942,FBgn0004403,FBgn0004852,FBgn0004867,FBgn0004926,FBgn0005533,FBgn0005593,FBgn0005674,FBgn0010198,FBgn0010217,FBgn0010265,FBg…	cytoplasmic part	GO:0044444	2.20351e-29	FBgn0000053,FBgn0000055,FBgn0000100,FBgn0000330,FBgn0000406,FBgn0000447,FBgn0000559,FBgn0000615,FBgn0001124,FBgn0001125,FBgn0001187,FBgn0001220,FBgn0001223,FBgn0001248,FBgn0002022,FBgn0002031,FBgn0002590,FBgn0002622,FBgn0002626,FBgn0002719,FBgn0002936,FBgn0003067,FBgn0003076,FBgn0003116,FBgn0003274,FBgn0003279,FBgn0003308,FBgn0003517,FBgn0003656,FBgn0003676,FBgn0003941,FBgn0003942,FBgn0004047,FBg…	oxidoreductase activity, acting on the CH-OH group of donors, NAD or NADP as acceptor	GO:0016616	2.64384e-07	FBgn0000055,FBgn0000056,FBgn0001248,FBgn0001258,FBgn0002719,FBgn0003204,FBgn0004057,FBgn0004654,FBgn0011768,FBgn0021765,FBgn0022160,FBgn0023477,FBgn0028479,FBgn0030026,FBgn0030239,FBgn0030737,FBgn0032350,FBgn0032889,FBgn0033949,FBgn0034390,FBgn0050499,FBgn0051673,FBgn0262782,FBgn0283427	Cytochrome P450	IPR001128	0.00167918	FBgn0005670,FBgn0013773,FBgn0014469,FBgn0015039,FBgn0015040,FBgn0025454,FBgn0030339,FBgn0031126,FBgn0031432,FBgn0031689,FBgn0031693,FBgn0033065,FBgn0033775,FBgn0034756,FBgn0035344,FBgn0036806,FBgn0037817,FBgn0038194,FBgn0038681,FBgn0041337,FBgn0050489,FBgn0053503	GTP hydrolysis and joining of the 60S ribosomal subunit	R-DME-72706	6.06368e-33	FBgn0000100,FBgn0002590,FBgn0002622,FBgn0002626,FBgn0003274,FBgn0003279,FBgn0003517,FBgn0003941,FBgn0004403,FBgn0004867,FBgn0005533,FBgn0005593,FBgn0010198,FBgn0010265,FBgn0010408,FBgn0010411,FBgn0011272,FBgn0011284,FBgn0013325,FBgn0014026,FBgn0015288,FBgn0015521,FBgn0015756,FBgn0016726,FBgn0017545,FBgn0017579,FBgn0020910,FBgn0023170,FBgn0024733,FBgn0026372,FBgn0028697,FBgn0029785,FBgn0029897,FBg…	anatomical structure development	GO:0048856	1.33242e-20	FBgn0000017,FBgn0000044,FBgn0000108,FBgn0000179,FBgn0000253,FBgn0000259,FBgn0000273,FBgn0000276,FBgn0000289,FBgn0000308,FBgn0000439,FBgn0000448,FBgn0000479,FBgn0000489,FBgn0000490,FBgn0000535,FBgn0000546,FBgn0000568,FBgn0000633,FBgn0000636,FBgn0000659,FBgn0000810,FBgn0001078,FBgn0001122,FBgn0001138,FBgn0001139,FBgn0001235,FBgn0001323,FBgn0001404,FBgn0001994,FBgn0002306,FBgn0002521,FBgn0002773,FBg…	presynapse	GO:0098793	3.17364e-06	FBgn0003165,FBgn0004242,FBgn0004575,FBgn0004580,FBgn0005586,FBgn0011288,FBgn0011582,FBgn0013342,FBgn0013343,FBgn0013759,FBgn0014010,FBgn0025726,FBgn0028400,FBgn0028582,FBgn0030897,FBgn0031424,FBgn0032901,FBgn0035756,FBgn0038659,FBgn0040505,FBgn0041605,FBgn0053547,FBgn0083228,FBgn0083963,FBgn0086677,FBgn0086913,FBgn0259168,FBgn0259246,FBgn0260964,FBgn0261822,FBgn0262483	molecular transducer activity	GO:0060089	1.52368e-06	FBgn0000038,FBgn0000253,FBgn0000448,FBgn0000535,FBgn0000546,FBgn0000568,FBgn0000636,FBgn0001078,FBgn0001122,FBgn0002306,FBgn0002723,FBgn0003218,FBgn0004168,FBgn0004244,FBgn0004369,FBgn0004370,FBgn0004435,FBgn0004569,FBgn0004865,FBgn0011582,FBgn0015399,FBgn0015609,FBgn0023178,FBgn0027109,FBgn0028875,FBgn0029761,FBgn0029814,FBgn0032048,FBgn0032151,FBgn0032840,FBgn0035023,FBgn0035092,FBgn0036260,FBg…	CD80-like, immunoglobulin C2-set	IPR013162	2.54259e-06	FBgn0000636,FBgn0003285,FBgn0024189,FBgn0028369,FBgn0029082,FBgn0037736,FBgn0039584,FBgn0259213,FBgn0262509,FBgn0266801	Glutamate Neurotransmitter Release Cycle	R-DME-210500	0.00431911	FBgn0004242,FBgn0005586,FBgn0013342,FBgn0031424,FBgn0261625
cellular amino acid metabolic process	GO:0006520	7.84534e-25	FBgn0000565,FBgn0000566,FBgn0001124,FBgn0001125,FBgn0001208,FBgn0002069,FBgn0003189,FBgn0003308,FBgn0003965,FBgn0005674,FBgn0013307,FBgn0014031,FBgn0014427,FBgn0014455,FBgn0015781,FBgn0020385,FBgn0022774,FBgn0023129,FBgn0023535,FBgn0023537,FBgn0026565,FBgn0027079,FBgn0027080,FBgn0027081,FBgn0027084,FBgn0027086,FBgn0027087,FBgn0027088,FBgn0027090,FBgn0027091,FBgn0027093,FBgn0027094,FBgn0027945,FBg…	cytosol	GO:0005829	8.28842e-26	FBgn0000053,FBgn0000055,FBgn0000100,FBgn0000559,FBgn0001124,FBgn0001187,FBgn0002590,FBgn0002622,FBgn0002626,FBgn0002719,FBgn0003076,FBgn0003274,FBgn0003279,FBgn0003308,FBgn0003517,FBgn0003676,FBgn0003941,FBgn0003942,FBgn0004403,FBgn0004852,FBgn0004867,FBgn0004926,FBgn0005278,FBgn0005533,FBgn0005593,FBgn0010198,FBgn0010225,FBgn0010265,FBgn0010408,FBgn0010411,FBgn0011272,FBgn0011284,FBgn0013325,FBg…	oxidoreductase activity, acting on CH-OH group of donors	GO:0016614	2.53041e-06	FBgn0000055,FBgn0000056,FBgn0001248,FBgn0001258,FBgn0002719,FBgn0003204,FBgn0003308,FBgn0004057,FBgn0004654,FBgn0011768,FBgn0021765,FBgn0022160,FBgn0023477,FBgn0023507,FBgn0028479,FBgn0030026,FBgn0030239,FBgn0030737,FBgn0032350,FBgn0032889,FBgn0033949,FBgn0034390,FBgn0037896,FBgn0050499,FBgn0051673,FBgn0262782,FBgn0267408,FBgn0283427	Aminoacyl-tRNA synthetase, class II	IPR006195	0.00388076	FBgn0002069,FBgn0005674,FBgn0027081,FBgn0027084,FBgn0027087,FBgn0027088,FBgn0031497,FBgn0086443	Nonsense Mediated Decay (NMD) independent of the Exon Junction Complex (EJC)	R-DME-975956	1.86625e-30	FBgn0000100,FBgn0002590,FBgn0002622,FBgn0002626,FBgn0003274,FBgn0003279,FBgn0003517,FBgn0003941,FBgn0004403,FBgn0004867,FBgn0005533,FBgn0005593,FBgn0010198,FBgn0010265,FBgn0010408,FBgn0010411,FBgn0011272,FBgn0011284,FBgn0013325,FBgn0014026,FBgn0015288,FBgn0015521,FBgn0015756,FBgn0016726,FBgn0017545,FBgn0017579,FBgn0020910,FBgn0023170,FBgn0024733,FBgn0026372,FBgn0028697,FBgn0029785,FBgn0029897,FBg…	single-organism developmental process	GO:0044767	1.34734e-20	FBgn0000017,FBgn0000044,FBgn0000108,FBgn0000179,FBgn0000253,FBgn0000259,FBgn0000273,FBgn0000276,FBgn0000289,FBgn0000308,FBgn0000439,FBgn0000448,FBgn0000479,FBgn0000489,FBgn0000490,FBgn0000535,FBgn0000546,FBgn0000568,FBgn0000633,FBgn0000636,FBgn0000659,FBgn0000810,FBgn0001078,FBgn0001122,FBgn0001138,FBgn0001139,FBgn0001235,FBgn0001323,FBgn0001404,FBgn0001994,FBgn0002306,FBgn0002521,FBgn0002773,FBg…	contractile fiber	GO:0043292	8.3934e-06	FBgn0002773,FBgn0004117,FBgn0004169,FBgn0005666,FBgn0025391,FBgn0027556,FBgn0033926,FBgn0034072,FBgn0038294,FBgn0039897,FBgn0052311,FBgn0063485,FBgn0261836,FBgn0265487,FBgn0265991	sequence-specific DNA binding	GO:0043565	1.79609e-06	FBgn0000179,FBgn0000289,FBgn0000439,FBgn0000448,FBgn0000546,FBgn0000568,FBgn0000659,FBgn0001078,FBgn0001138,FBgn0001235,FBgn0001323,FBgn0001994,FBgn0002521,FBgn0002723,FBgn0003896,FBgn0004102,FBgn0004198,FBgn0004595,FBgn0004618,FBgn0004795,FBgn0004865,FBgn0011481,FBgn0011766,FBgn0013799,FBgn0015664,FBgn0022238,FBgn0023215,FBgn0024321,FBgn0026411,FBgn0028550,FBgn0029939,FBgn0030505,FBgn0032202,FBg…	Fibronectin type III	IPR003961	4.98262e-06	FBgn0002306,FBgn0004369,FBgn0004370,FBgn0005666,FBgn0010473,FBgn0017590,FBgn0024189,FBgn0027499,FBgn0029082,FBgn0036454,FBgn0037240,FBgn0037736,FBgn0041097,FBgn0085382,FBgn0262483,FBgn0264975,FBgn0265296	Postsynaptic nicotinic acetylcholine receptors	R-DME-622327	0.00431911	FBgn0000038,FBgn0028875,FBgn0032151,FBgn0086778,FBgn0266347
oxidation-reduction process	GO:0055114	4.59699e-24	FBgn0000055,FBgn0000056,FBgn0000406,FBgn0000447,FBgn0000565,FBgn0001092,FBgn0001208,FBgn0001248,FBgn0001258,FBgn0002719,FBgn0003076,FBgn0003204,FBgn0003308,FBgn0003965,FBgn0004057,FBgn0004654,FBgn0005670,FBgn0010222,FBgn0010226,FBgn0010516,FBgn0011703,FBgn0011768,FBgn0012036,FBgn0013773,FBgn0014002,FBgn0014469,FBgn0014903,FBgn0015039,FBgn0015040,FBgn0015781,FBgn0019957,FBgn0020385,FBgn0021765,FBg…	intracellular ribonucleoprotein complex	GO:0030529	5.74518e-25	FBgn0000100,FBgn0000615,FBgn0002590,FBgn0002622,FBgn0002626,FBgn0003062,FBgn0003274,FBgn0003279,FBgn0003517,FBgn0003941,FBgn0003942,FBgn0004047,FBgn0004403,FBgn0004867,FBgn0004926,FBgn0005533,FBgn0005593,FBgn0010198,FBgn0010265,FBgn0010408,FBgn0010411,FBgn0010747,FBgn0011016,FBgn0011272,FBgn0011284,FBgn0011638,FBgn0011824,FBgn0013325,FBgn0014026,FBgn0015288,FBgn0015393,FBgn0015521,FBgn0015756,FBg…	coenzyme binding	GO:0050662	1.2188e-05	FBgn0000056,FBgn0001092,FBgn0001248,FBgn0002719,FBgn0003308,FBgn0004057,FBgn0010387,FBgn0010516,FBgn0014455,FBgn0023507,FBgn0023537,FBgn0027572,FBgn0030737,FBgn0031824,FBgn0031860,FBgn0032350,FBgn0032889,FBgn0033079,FBgn0033543,FBgn0033949,FBgn0034390,FBgn0034488,FBgn0034628,FBgn0034629,FBgn0034943,FBgn0035911,FBgn0036824,FBgn0036997,FBgn0037001,FBgn0037896,FBgn0038742,FBgn0039827,FBgn0051673,FBg…	Pyridoxal phosphate-dependent transferase, major region, subdomain 1	IPR015421	0.00388557	FBgn0000566,FBgn0010591,FBgn0014031,FBgn0014427,FBgn0022774,FBgn0029823,FBgn0030478,FBgn0036208,FBgn0036975,FBgn0037801,FBgn0037955,FBgn0039094	Metabolism	R-DME-1430728	1.87763e-27	FBgn0000052,FBgn0000053,FBgn0000055,FBgn0000056,FBgn0000239,FBgn0000447,FBgn0000536,FBgn0000566,FBgn0001124,FBgn0001125,FBgn0001187,FBgn0001208,FBgn0001248,FBgn0001258,FBgn0002284,FBgn0003067,FBgn0003074,FBgn0003189,FBgn0003204,FBgn0003308,FBgn0003656,FBgn0003965,FBgn0004045,FBgn0004047,FBgn0004057,FBgn0004654,FBgn0004797,FBgn0004852,FBgn0005278,FBgn0005391,FBgn0010217,FBgn0010222,FBgn0010226,FBg…	regulation of biological process	GO:0050789	4.02342e-20	FBgn0000017,FBgn0000038,FBgn0000044,FBgn0000108,FBgn0000179,FBgn0000253,FBgn0000259,FBgn0000273,FBgn0000276,FBgn0000289,FBgn0000308,FBgn0000439,FBgn0000448,FBgn0000479,FBgn0000490,FBgn0000535,FBgn0000546,FBgn0000568,FBgn0000659,FBgn0000810,FBgn0001078,FBgn0001122,FBgn0001138,FBgn0001139,FBgn0001235,FBgn0001323,FBgn0001404,FBgn0001994,FBgn0002521,FBgn0002723,FBgn0002921,FBgn0003165,FBgn0003209,FBg…	myofibril	GO:0030016	1.48746e-05	FBgn0002773,FBgn0004117,FBgn0004169,FBgn0005666,FBgn0025391,FBgn0033926,FBgn0034072,FBgn0038294,FBgn0039897,FBgn0052311,FBgn0063485,FBgn0261836,FBgn0265487,FBgn0265991	signaling receptor activity	GO:0038023	1.82379e-06	FBgn0000038,FBgn0000253,FBgn0000448,FBgn0000535,FBgn0000546,FBgn0000568,FBgn0001078,FBgn0001122,FBgn0002723,FBgn0003218,FBgn0004168,FBgn0004244,FBgn0004369,FBgn0004370,FBgn0004435,FBgn0004865,FBgn0011582,FBgn0015399,FBgn0023178,FBgn0027109,FBgn0028875,FBgn0029761,FBgn0029814,FBgn0032048,FBgn0032151,FBgn0032840,FBgn0035023,FBgn0035092,FBgn0036260,FBgn0036494,FBgn0037976,FBgn0038063,FBgn0038880,FBg…	Immunoglobulin V-set domain	IPR013106	0.000576625	FBgn0010473,FBgn0028369,FBgn0034286,FBgn0037736,FBgn0039584,FBgn0040823,FBgn0041097,FBgn0053481,FBgn0260995,FBgn0262509	Activation of Nicotinic Acetylcholine Receptors	R-DME-629602	0.00431911	FBgn0000038,FBgn0028875,FBgn0032151,FBgn0086778,FBgn0266347
metabolic process	GO:0008152	2.49194e-23	FBgn0000052,FBgn0000053,FBgn0000055,FBgn0000056,FBgn0000100,FBgn0000150,FBgn0000239,FBgn0000330,FBgn0000406,FBgn0000447,FBgn0000455,FBgn0000477,FBgn0000504,FBgn0000536,FBgn0000559,FBgn0000565,FBgn0000566,FBgn0000592,FBgn0000615,FBgn0000964,FBgn0000996,FBgn0001092,FBgn0001124,FBgn0001125,FBgn0001187,FBgn0001208,FBgn0001220,FBgn0001248,FBgn0001258,FBgn0002022,FBgn0002069,FBgn0002284,FBgn0002590,FBg…	ribonucleoprotein complex	GO:1990904	5.74518e-25	FBgn0000100,FBgn0000615,FBgn0002590,FBgn0002622,FBgn0002626,FBgn0003062,FBgn0003274,FBgn0003279,FBgn0003517,FBgn0003941,FBgn0003942,FBgn0004047,FBgn0004403,FBgn0004867,FBgn0004926,FBgn0005533,FBgn0005593,FBgn0010198,FBgn0010265,FBgn0010408,FBgn0010411,FBgn0010747,FBgn0011016,FBgn0011272,FBgn0011284,FBgn0011638,FBgn0011824,FBgn0013325,FBgn0014026,FBgn0015288,FBgn0015393,FBgn0015521,FBgn0015756,FBg…	aminoacyl-tRNA ligase activity	GO:0004812	4.34103e-05	FBgn0002069,FBgn0005674,FBgn0027079,FBgn0027080,FBgn0027081,FBgn0027084,FBgn0027086,FBgn0027087,FBgn0027088,FBgn0027090,FBgn0027091,FBgn0027093,FBgn0027094,FBgn0031497,FBgn0034401,FBgn0086443	Short-chain dehydrogenase/reductase, conserved site	IPR020904	0.00461383	FBgn0000055,FBgn0000056,FBgn0021765,FBgn0029648,FBgn0030731,FBgn0030968,FBgn0035964,FBgn0037354,FBgn0040349,FBgn0051548	Nonsense-Mediated Decay (NMD)	R-DME-927802	4.34287e-25	FBgn0000100,FBgn0002590,FBgn0002622,FBgn0002626,FBgn0003274,FBgn0003279,FBgn0003517,FBgn0003941,FBgn0004403,FBgn0004867,FBgn0005533,FBgn0005593,FBgn0010198,FBgn0010265,FBgn0010408,FBgn0010411,FBgn0011272,FBgn0011284,FBgn0013325,FBgn0014026,FBgn0015288,FBgn0015521,FBgn0015756,FBgn0016726,FBgn0017545,FBgn0017579,FBgn0020910,FBgn0023170,FBgn0024733,FBgn0026372,FBgn0028697,FBgn0029785,FBgn0029897,FBg…	regulation of cellular process	GO:0050794	6.77237e-20	FBgn0000017,FBgn0000038,FBgn0000044,FBgn0000108,FBgn0000179,FBgn0000253,FBgn0000259,FBgn0000273,FBgn0000276,FBgn0000289,FBgn0000308,FBgn0000439,FBgn0000448,FBgn0000479,FBgn0000490,FBgn0000535,FBgn0000546,FBgn0000568,FBgn0000659,FBgn0000810,FBgn0001078,FBgn0001122,FBgn0001138,FBgn0001139,FBgn0001235,FBgn0001323,FBgn0001994,FBgn0002521,FBgn0002723,FBgn0002921,FBgn0003165,FBgn0003209,FBgn0003218,FBg…	terminal bouton	GO:0043195	2.92971e-05	FBgn0003165,FBgn0004242,FBgn0004575,FBgn0004580,FBgn0011288,FBgn0013342,FBgn0013343,FBgn0013759,FBgn0025726,FBgn0032901,FBgn0040505,FBgn0041605,FBgn0086677,FBgn0259168	regulatory region DNA binding	GO:0000975	2.02121e-06	FBgn0000179,FBgn0000289,FBgn0000439,FBgn0000448,FBgn0000546,FBgn0000568,FBgn0000659,FBgn0001078,FBgn0001138,FBgn0001235,FBgn0001323,FBgn0001994,FBgn0002521,FBgn0002723,FBgn0003896,FBgn0004102,FBgn0004198,FBgn0004595,FBgn0004618,FBgn0004795,FBgn0004865,FBgn0011481,FBgn0011766,FBgn0013799,FBgn0015664,FBgn0022238,FBgn0023215,FBgn0028550,FBgn0029939,FBgn0030505,FBgn0032202,FBgn0037698,FBgn0038063,FBg…	Tyrosine specific protein phosphatases domain	IPR000387	0.00374565	FBgn0004369,FBgn0004370,FBgn0024734,FBgn0028341,FBgn0030976,FBgn0031294,FBgn0036844,FBgn0243512,FBgn0267487	Phototransduction - fly	4745	0.0134755	FBgn0000044,FBgn0000046,FBgn0000253,FBgn0004435,FBgn0005614,FBgn0262738,FBgn0267252
cellular amide metabolic process	GO:0043603	3.37257e-23	FBgn0000100,FBgn0000559,FBgn0000566,FBgn0002069,FBgn0002590,FBgn0002622,FBgn0002626,FBgn0003274,FBgn0003279,FBgn0003517,FBgn0003941,FBgn0003942,FBgn0004403,FBgn0004867,FBgn0004926,FBgn0005533,FBgn0005593,FBgn0005674,FBgn0010198,FBgn0010222,FBgn0010226,FBgn0010265,FBgn0010391,FBgn0010408,FBgn0010411,FBgn0010747,FBgn0011272,FBgn0011284,FBgn0013325,FBgn0014026,FBgn0015288,FBgn0015393,FBgn0015521,FBg…	large ribosomal subunit	GO:0015934	8.87983e-19	FBgn0000100,FBgn0002626,FBgn0003274,FBgn0003279,FBgn0003941,FBgn0005593,FBgn0011272,FBgn0013325,FBgn0014026,FBgn0015288,FBgn0015756,FBgn0016726,FBgn0017579,FBgn0020910,FBgn0023170,FBgn0024733,FBgn0026372,FBgn0028697,FBgn0029785,FBgn0029897,FBgn0030433,FBgn0030616,FBgn0030786,FBgn0030878,FBgn0031660,FBgn0031980,FBgn0032050,FBgn0032404,FBgn0032518,FBgn0032987,FBgn0034968,FBgn0035422,FBgn0035753,FBg…	ligase activity, forming carbon-oxygen bonds	GO:0016875	4.34103e-05	FBgn0002069,FBgn0005674,FBgn0027079,FBgn0027080,FBgn0027081,FBgn0027084,FBgn0027086,FBgn0027087,FBgn0027088,FBgn0027090,FBgn0027091,FBgn0027093,FBgn0027094,FBgn0031497,FBgn0034401,FBgn0086443	Peptidase M13, N-terminal domain	IPR008753	0.0130852	FBgn0027578,FBgn0029769,FBgn0030425,FBgn0037230,FBgn0037727,FBgn0039022,FBgn0039023,FBgn0039024,FBgn0039611,FBgn0039612	Nonsense Mediated Decay (NMD) enhanced by the Exon Junction Complex (EJC)	R-DME-975957	4.34287e-25	FBgn0000100,FBgn0002590,FBgn0002622,FBgn0002626,FBgn0003274,FBgn0003279,FBgn0003517,FBgn0003941,FBgn0004403,FBgn0004867,FBgn0005533,FBgn0005593,FBgn0010198,FBgn0010265,FBgn0010408,FBgn0010411,FBgn0011272,FBgn0011284,FBgn0013325,FBgn0014026,FBgn0015288,FBgn0015521,FBgn0015756,FBgn0016726,FBgn0017545,FBgn0017579,FBgn0020910,FBgn0023170,FBgn0024733,FBgn0026372,FBgn0028697,FBgn0029785,FBgn0029897,FBg…	cellular developmental process	GO:0048869	3.7608e-19	FBgn0000017,FBgn0000044,FBgn0000108,FBgn0000253,FBgn0000259,FBgn0000273,FBgn0000276,FBgn0000308,FBgn0000479,FBgn0000490,FBgn0000535,FBgn0000546,FBgn0000568,FBgn0000633,FBgn0000636,FBgn0000659,FBgn0000810,FBgn0001078,FBgn0001122,FBgn0001138,FBgn0001139,FBgn0001235,FBgn0001323,FBgn0001404,FBgn0002306,FBgn0002521,FBgn0002773,FBgn0002921,FBgn0003165,FBgn0003209,FBgn0003285,FBgn0003380,FBgn0003435,FBg…	neuromuscular junction	GO:0031594	3.02225e-05	FBgn0000636,FBgn0003165,FBgn0004242,FBgn0005775,FBgn0010415,FBgn0013759,FBgn0020386,FBgn0028400,FBgn0032901,FBgn0034072,FBgn0040752,FBgn0041605,FBgn0259246,FBgn0260964,FBgn0263456,FBgn0266521	regulatory region nucleic acid binding	GO:0001067	2.02121e-06	FBgn0000179,FBgn0000289,FBgn0000439,FBgn0000448,FBgn0000546,FBgn0000568,FBgn0000659,FBgn0001078,FBgn0001138,FBgn0001235,FBgn0001323,FBgn0001994,FBgn0002521,FBgn0002723,FBgn0003896,FBgn0004102,FBgn0004198,FBgn0004595,FBgn0004618,FBgn0004795,FBgn0004865,FBgn0011481,FBgn0011766,FBgn0013799,FBgn0015664,FBgn0022238,FBgn0023215,FBgn0028550,FBgn0029939,FBgn0030505,FBgn0032202,FBgn0037698,FBgn0038063,FBg…	RNA recognition motif domain	IPR000504	0.00643647	FBgn0003435,FBgn0004838,FBgn0011206,FBgn0011224,FBgn0011666,FBgn0016977,FBgn0030479,FBgn0035016,FBgn0035424,FBgn0051140,FBgn0052062,FBgn0052423,FBgn0085383,FBgn0085391,FBgn0086675,FBgn0260400,FBgn0260943,FBgn0263198,FBgn0263995,FBgn0264001,FBgn0264270	G alpha (q) signalling events	R-DME-416476	0.0138582	FBgn0004435,FBgn0028743,FBgn0051140,FBgn0085413,FBgn0259680,FBgn0262738
amide biosynthetic process	GO:0043604	2.82359e-21	FBgn0000100,FBgn0000559,FBgn0000566,FBgn0002069,FBgn0002590,FBgn0002622,FBgn0002626,FBgn0003274,FBgn0003279,FBgn0003517,FBgn0003941,FBgn0003942,FBgn0004403,FBgn0004867,FBgn0004926,FBgn0005533,FBgn0005593,FBgn0005674,FBgn0010198,FBgn0010265,FBgn0010391,FBgn0010408,FBgn0010411,FBgn0010747,FBgn0011272,FBgn0011284,FBgn0013325,FBgn0014026,FBgn0015288,FBgn0015393,FBgn0015521,FBgn0015527,FBgn0015756,FBg…	cytosolic small ribosomal subunit	GO:0022627	4.90786e-17	FBgn0002590,FBgn0002622,FBgn0003517,FBgn0003942,FBgn0004403,FBgn0004867,FBgn0004926,FBgn0005533,FBgn0010198,FBgn0010265,FBgn0010408,FBgn0010411,FBgn0011284,FBgn0015521,FBgn0017545,FBgn0033555,FBgn0033699,FBgn0033912,FBgn0034743,FBgn0035423,FBgn0038834,FBgn0039300,FBgn0039713,FBgn0039757,FBgn0260441,FBgn0261592,FBgn0261597,FBgn0261609,FBgn0263740	ligase activity, forming aminoacyl-tRNA and related compounds	GO:0016876	4.34103e-05	FBgn0002069,FBgn0005674,FBgn0027079,FBgn0027080,FBgn0027081,FBgn0027084,FBgn0027086,FBgn0027087,FBgn0027088,FBgn0027090,FBgn0027091,FBgn0027093,FBgn0027094,FBgn0031497,FBgn0034401,FBgn0086443	Aldolase-type TIM barrel	IPR013785	0.0130852	FBgn0000447,FBgn0003204,FBgn0023477,FBgn0027580,FBgn0033735,FBgn0034117,FBgn0050499,FBgn0061356,FBgn0086355,FBgn0086450	Translation	R-DME-72766	3.99111e-22	FBgn0000100,FBgn0000559,FBgn0002590,FBgn0002622,FBgn0002626,FBgn0003274,FBgn0003279,FBgn0003517,FBgn0003941,FBgn0004403,FBgn0004867,FBgn0004926,FBgn0005533,FBgn0005593,FBgn0010198,FBgn0010265,FBgn0010408,FBgn0010411,FBgn0010747,FBgn0011272,FBgn0011284,FBgn0013325,FBgn0014026,FBgn0015288,FBgn0015521,FBgn0015756,FBgn0015834,FBgn0016687,FBgn0016726,FBgn0017545,FBgn0017579,FBgn0020910,FBgn0022023,FBg…	cell differentiation	GO:0030154	3.95511e-19	FBgn0000017,FBgn0000044,FBgn0000108,FBgn0000253,FBgn0000259,FBgn0000273,FBgn0000276,FBgn0000308,FBgn0000479,FBgn0000490,FBgn0000535,FBgn0000546,FBgn0000568,FBgn0000633,FBgn0000636,FBgn0000659,FBgn0000810,FBgn0001078,FBgn0001122,FBgn0001138,FBgn0001139,FBgn0001235,FBgn0001323,FBgn0001404,FBgn0002306,FBgn0002521,FBgn0002773,FBgn0003165,FBgn0003209,FBgn0003285,FBgn0003380,FBgn0003435,FBgn0003463,FBg…	contractile fiber part	GO:0044449	3.12862e-05	FBgn0004117,FBgn0004169,FBgn0005666,FBgn0025391,FBgn0027556,FBgn0033926,FBgn0034072,FBgn0038294,FBgn0039897,FBgn0052311,FBgn0063485,FBgn0261836,FBgn0265487,FBgn0265991	transcription regulatory region DNA binding	GO:0044212	2.10343e-06	FBgn0000179,FBgn0000289,FBgn0000439,FBgn0000448,FBgn0000546,FBgn0000568,FBgn0000659,FBgn0001078,FBgn0001138,FBgn0001235,FBgn0001323,FBgn0001994,FBgn0002521,FBgn0002723,FBgn0003896,FBgn0004102,FBgn0004198,FBgn0004595,FBgn0004618,FBgn0004795,FBgn0004865,FBgn0011481,FBgn0011766,FBgn0013799,FBgn0015664,FBgn0022238,FBgn0023215,FBgn0028550,FBgn0029939,FBgn0030505,FBgn0032202,FBgn0037698,FBgn0038063,FBg…	VWFC domain	IPR001007	0.00730075	FBgn0002306,FBgn0003463,FBgn0032414,FBgn0039257,FBgn0051869,FBgn0259823	GPCR downstream signaling	R-DME-388396	0.0143183	FBgn0000479,FBgn0004435,FBgn0011582,FBgn0020386,FBgn0028743,FBgn0038063,FBgn0038980,FBgn0051140,FBgn0052683,FBgn0085413,FBgn0259680,FBgn0262738
peptide metabolic process	GO:0006518	2.93526e-20	FBgn0000100,FBgn0000559,FBgn0000566,FBgn0002069,FBgn0002590,FBgn0002622,FBgn0002626,FBgn0003274,FBgn0003279,FBgn0003517,FBgn0003941,FBgn0003942,FBgn0004403,FBgn0004867,FBgn0004926,FBgn0005533,FBgn0005593,FBgn0005674,FBgn0010198,FBgn0010226,FBgn0010265,FBgn0010391,FBgn0010408,FBgn0010411,FBgn0010747,FBgn0011272,FBgn0011284,FBgn0013325,FBgn0014026,FBgn0015288,FBgn0015393,FBgn0015521,FBgn0015527,FBg…	small ribosomal subunit	GO:0015935	6.46396e-11	FBgn0002590,FBgn0002622,FBgn0003517,FBgn0003942,FBgn0004403,FBgn0004867,FBgn0004926,FBgn0005533,FBgn0010198,FBgn0010265,FBgn0010408,FBgn0010411,FBgn0011284,FBgn0015521,FBgn0017545,FBgn0033555,FBgn0033699,FBgn0033912,FBgn0034743,FBgn0035423,FBgn0037529,FBgn0038834,FBgn0039300,FBgn0039713,FBgn0039757,FBgn0260441,FBgn0261592,FBgn0261597,FBgn0261609,FBgn0263740	fatty acid ligase activity	GO:0015645	9.64479e-05	FBgn0010516,FBgn0027348,FBgn0027572,FBgn0028479,FBgn0028519,FBgn0029969,FBgn0030731,FBgn0032161,FBgn0032162,FBgn0034628,FBgn0034629,FBgn0037440,FBgn0040064,FBgn0040349,FBgn0263120	Acyl-CoA oxidase/dehydrogenase, central domain	IPR006091	0.0144664	FBgn0027572,FBgn0031824,FBgn0034628,FBgn0034629,FBgn0035911,FBgn0036824,FBgn0038742	Metabolic pathways	1100	2.81189e-21	FBgn0000052,FBgn0000053,FBgn0000055,FBgn0000150,FBgn0000239,FBgn0000447,FBgn0000536,FBgn0000566,FBgn0000592,FBgn0001092,FBgn0001124,FBgn0001125,FBgn0001187,FBgn0001208,FBgn0001248,FBgn0001258,FBgn0002719,FBgn0003067,FBgn0003074,FBgn0003076,FBgn0003189,FBgn0003204,FBgn0003308,FBgn0003965,FBgn0004057,FBgn0004654,FBgn0004797,FBgn0005278,FBgn0005674,FBgn0010217,FBgn0010222,FBgn0010591,FBgn0010611,FBg…	multicellular organismal process	GO:0032501	9.91732e-19	FBgn0000017,FBgn0000044,FBgn0000108,FBgn0000179,FBgn0000253,FBgn0000259,FBgn0000273,FBgn0000276,FBgn0000289,FBgn0000308,FBgn0000439,FBgn0000448,FBgn0000479,FBgn0000489,FBgn0000490,FBgn0000535,FBgn0000546,FBgn0000568,FBgn0000633,FBgn0000636,FBgn0000659,FBgn0000810,FBgn0001078,FBgn0001122,FBgn0001138,FBgn0001139,FBgn0001235,FBgn0001323,FBgn0001404,FBgn0001994,FBgn0002306,FBgn0002521,FBgn0002773,FBg…	intrinsic component of plasma membrane	GO:0031226	3.22386e-05	FBgn0000038,FBgn0000535,FBgn0000636,FBgn0002306,FBgn0002921,FBgn0003218,FBgn0003380,FBgn0003386,FBgn0005614,FBgn0010473,FBgn0011582,FBgn0015399,FBgn0015400,FBgn0015609,FBgn0015777,FBgn0015872,FBgn0028704,FBgn0028875,FBgn0029663,FBgn0029762,FBgn0029814,FBgn0029837,FBgn0029974,FBgn0032151,FBgn0032946,FBgn0034286,FBgn0035975,FBgn0036260,FBgn0038063,FBgn0038498,FBgn0038880,FBgn0038980,FBgn0040726,FBg…	double-stranded DNA binding	GO:0003690	4.74309e-06	FBgn0000179,FBgn0000289,FBgn0000439,FBgn0000448,FBgn0000546,FBgn0000568,FBgn0000659,FBgn0001078,FBgn0001138,FBgn0001235,FBgn0001323,FBgn0001994,FBgn0002521,FBgn0002723,FBgn0003896,FBgn0004102,FBgn0004198,FBgn0004595,FBgn0004618,FBgn0004795,FBgn0004865,FBgn0011481,FBgn0011766,FBgn0013799,FBgn0015664,FBgn0022238,FBgn0023215,FBgn0028550,FBgn0029939,FBgn0030505,FBgn0032202,FBgn0037698,FBgn0038063,FBg…	Neurotransmitter-gated ion-channel transmembrane domain	IPR006029	0.0218916	FBgn0000038,FBgn0004244,FBgn0028875,FBgn0032151,FBgn0086778,FBgn0264908,FBgn0266347	Nephrin family interactions	R-DME-373753	0.0147142	FBgn0003285,FBgn0024189,FBgn0028369,FBgn0029082,FBgn0260657
peptide biosynthetic process	GO:0043043	5.16385e-20	FBgn0000100,FBgn0000559,FBgn0000566,FBgn0002069,FBgn0002590,FBgn0002622,FBgn0002626,FBgn0003274,FBgn0003279,FBgn0003517,FBgn0003941,FBgn0003942,FBgn0004403,FBgn0004867,FBgn0004926,FBgn0005533,FBgn0005593,FBgn0005674,FBgn0010198,FBgn0010265,FBgn0010391,FBgn0010408,FBgn0010411,FBgn0010747,FBgn0011272,FBgn0011284,FBgn0013325,FBgn0014026,FBgn0015288,FBgn0015393,FBgn0015521,FBgn0015527,FBgn0015756,FBg…	eukaryotic translation initiation factor 3 complex	GO:0005852	4.87562e-07	FBgn0015834,FBgn0022023,FBgn0025582,FBgn0033902,FBgn0034237,FBgn0034258,FBgn0034654,FBgn0036258,FBgn0037249,FBgn0037270,FBgn0040227,FBgn0086706	intramolecular oxidoreductase activity, interconverting aldoses and ketoses	GO:0016861	0.000189911	FBgn0003074,FBgn0004654,FBgn0011770,FBgn0023477,FBgn0031717,FBgn0037744,FBgn0050499,FBgn0086355	Aldehyde/histidinol dehydrogenase	IPR016161	0.0144664	FBgn0012036,FBgn0023537,FBgn0030451,FBgn0032945,FBgn0036857,FBgn0051075,FBgn0053092	Formation of the ternary complex, and subsequently, the 43S complex	R-DME-72695	2.56486e-19	FBgn0002590,FBgn0002622,FBgn0003517,FBgn0004403,FBgn0004867,FBgn0004926,FBgn0005533,FBgn0010198,FBgn0010265,FBgn0010408,FBgn0010411,FBgn0011284,FBgn0015521,FBgn0015834,FBgn0017545,FBgn0022023,FBgn0025582,FBgn0033555,FBgn0033699,FBgn0033902,FBgn0033912,FBgn0034237,FBgn0034258,FBgn0034654,FBgn0034743,FBgn0036258,FBgn0037249,FBgn0037270,FBgn0038834,FBgn0039300,FBgn0039713,FBgn0039757,FBgn0040227,FBg…	anatomical structure morphogenesis	GO:0009653	1.03388e-17	FBgn0000017,FBgn0000108,FBgn0000179,FBgn0000253,FBgn0000273,FBgn0000276,FBgn0000289,FBgn0000308,FBgn0000439,FBgn0000479,FBgn0000489,FBgn0000490,FBgn0000546,FBgn0000633,FBgn0000636,FBgn0000659,FBgn0001078,FBgn0001122,FBgn0001138,FBgn0001139,FBgn0001235,FBgn0001404,FBgn0002306,FBgn0002521,FBgn0002773,FBgn0002921,FBgn0003165,FBgn0003209,FBgn0003285,FBgn0003380,FBgn0003435,FBgn0003463,FBgn0003475,FBg…	neuron projection	GO:0043005	4.17715e-05	FBgn0000017,FBgn0000273,FBgn0000308,FBgn0000546,FBgn0003165,FBgn0004242,FBgn0004244,FBgn0004369,FBgn0004370,FBgn0004575,FBgn0004580,FBgn0005614,FBgn0005775,FBgn0010113,FBgn0011288,FBgn0013342,FBgn0013343,FBgn0013759,FBgn0015609,FBgn0015774,FBgn0015777,FBgn0025726,FBgn0032840,FBgn0032901,FBgn0033438,FBgn0036260,FBgn0037447,FBgn0040505,FBgn0040823,FBgn0041097,FBgn0041605,FBgn0052057,FBgn0052791,FBg…	binding	GO:0005488	5.43163e-06	FBgn0000017,FBgn0000038,FBgn0000108,FBgn0000179,FBgn0000253,FBgn0000259,FBgn0000273,FBgn0000289,FBgn0000308,FBgn0000439,FBgn0000448,FBgn0000489,FBgn0000490,FBgn0000546,FBgn0000568,FBgn0000636,FBgn0000659,FBgn0000810,FBgn0001078,FBgn0001122,FBgn0001138,FBgn0001139,FBgn0001186,FBgn0001235,FBgn0001323,FBgn0001994,FBgn0002521,FBgn0002723,FBgn0002773,FBgn0002868,FBgn0002921,FBgn0003165,FBgn0003218,FBg…	Nicotinic acetylcholine receptor	IPR002394	0.0220282	FBgn0000038,FBgn0028875,FBgn0032151,FBgn0086778,FBgn0266347	Acetylcholine Neurotransmitter Release Cycle	R-DME-264642	0.0147177	FBgn0004242,FBgn0005586,FBgn0013342,FBgn0270928
translation	GO:0006412	5.29787e-20	FBgn0000100,FBgn0000559,FBgn0002069,FBgn0002590,FBgn0002622,FBgn0002626,FBgn0003274,FBgn0003279,FBgn0003517,FBgn0003941,FBgn0003942,FBgn0004403,FBgn0004867,FBgn0004926,FBgn0005533,FBgn0005593,FBgn0005674,FBgn0010198,FBgn0010265,FBgn0010391,FBgn0010408,FBgn0010411,FBgn0010747,FBgn0011272,FBgn0011284,FBgn0013325,FBgn0014026,FBgn0015288,FBgn0015393,FBgn0015521,FBgn0015527,FBgn0015756,FBgn0015834,FBg…	intracellular part	GO:0044424	5.80394e-06	FBgn0000052,FBgn0000053,FBgn0000055,FBgn0000100,FBgn0000150,FBgn0000239,FBgn0000330,FBgn0000406,FBgn0000447,FBgn0000504,FBgn0000536,FBgn0000559,FBgn0000566,FBgn0000615,FBgn0000964,FBgn0000996,FBgn0001124,FBgn0001125,FBgn0001187,FBgn0001220,FBgn0001223,FBgn0001248,FBgn0001258,FBgn0002022,FBgn0002031,FBgn0002069,FBgn0002284,FBgn0002590,FBgn0002622,FBgn0002626,FBgn0002719,FBgn0002780,FBgn0002905,FBg…	iron ion binding	GO:0005506	0.000346371	FBgn0001208,FBgn0003308,FBgn0005670,FBgn0013773,FBgn0014469,FBgn0015039,FBgn0015040,FBgn0025454,FBgn0027657,FBgn0030339,FBgn0031126,FBgn0031432,FBgn0031689,FBgn0031693,FBgn0033065,FBgn0033775,FBgn0034364,FBgn0034756,FBgn0035344,FBgn0036147,FBgn0036262,FBgn0036806,FBgn0037817,FBgn0038194,FBgn0038681,FBgn0038795,FBgn0041337,FBgn0050489,FBgn0052500,FBgn0052857,FBgn0053502,FBgn0053503,FBgn0086706,FBg…	S15/NS1, RNA-binding	IPR009068	0.0147727	FBgn0005674,FBgn0010265,FBgn0027087,FBgn0027088,FBgn0034401	Metabolism of amino acids and derivatives	R-DME-71291	3.57163e-17	FBgn0000566,FBgn0001124,FBgn0001125,FBgn0001208,FBgn0002284,FBgn0003965,FBgn0005278,FBgn0013307,FBgn0014031,FBgn0014427,FBgn0014455,FBgn0014903,FBgn0015781,FBgn0016697,FBgn0019932,FBgn0021765,FBgn0022774,FBgn0023129,FBgn0023535,FBgn0023537,FBgn0025687,FBgn0027610,FBgn0027945,FBgn0028425,FBgn0028686,FBgn0028689,FBgn0028693,FBgn0029689,FBgn0029823,FBgn0029969,FBgn0030218,FBgn0030478,FBgn0030482,FBg…	neuron differentiation	GO:0030182	5.62646e-17	FBgn0000017,FBgn0000108,FBgn0000253,FBgn0000273,FBgn0000308,FBgn0000479,FBgn0000546,FBgn0000636,FBgn0001078,FBgn0001122,FBgn0001138,FBgn0001139,FBgn0001235,FBgn0001404,FBgn0002306,FBgn0002521,FBgn0003165,FBgn0003380,FBgn0003435,FBgn0003896,FBgn0003997,FBgn0004102,FBgn0004108,FBgn0004198,FBgn0004369,FBgn0004370,FBgn0004395,FBgn0004397,FBgn0004435,FBgn0004595,FBgn0004618,FBgn0004635,FBgn0004795,FBg…	cell junction	GO:0030054	4.46841e-05	FBgn0000017,FBgn0000636,FBgn0002921,FBgn0003285,FBgn0004397,FBgn0010238,FBgn0010415,FBgn0015609,FBgn0015777,FBgn0024189,FBgn0028369,FBgn0029082,FBgn0031850,FBgn0032731,FBgn0037240,FBgn0063485,FBgn0085387,FBgn0085409,FBgn0259745,FBgn0260799,FBgn0264975,FBgn0265991,FBgn0266409	signal transducer activity	GO:0004871	5.81873e-06	FBgn0000038,FBgn0000253,FBgn0000448,FBgn0000535,FBgn0000546,FBgn0000568,FBgn0001078,FBgn0001122,FBgn0002723,FBgn0003218,FBgn0004168,FBgn0004244,FBgn0004369,FBgn0004370,FBgn0004435,FBgn0004865,FBgn0011582,FBgn0011817,FBgn0014135,FBgn0015399,FBgn0023083,FBgn0023178,FBgn0024941,FBgn0027109,FBgn0028875,FBgn0029761,FBgn0029814,FBgn0032048,FBgn0032151,FBgn0032840,FBgn0035023,FBgn0035092,FBgn0036260,FBg…	Neurotransmitter-gated ion-channel	IPR006201	0.0245664	FBgn0000038,FBgn0004244,FBgn0028875,FBgn0032151,FBgn0086778,FBgn0264908,FBgn0266347	Opioid Signalling	R-DME-111885	0.0158732	FBgn0000253,FBgn0000273,FBgn0000479,FBgn0001122,FBgn0022382,FBgn0259680,FBgn0262738
formation of translation initiation ternary complex	GO:0001677	1.67175e-19	FBgn0000100,FBgn0002590,FBgn0002622,FBgn0002626,FBgn0003274,FBgn0003279,FBgn0003517,FBgn0003941,FBgn0003942,FBgn0004403,FBgn0004867,FBgn0004926,FBgn0005533,FBgn0005593,FBgn0010198,FBgn0010265,FBgn0010391,FBgn0010408,FBgn0010411,FBgn0010747,FBgn0011272,FBgn0011284,FBgn0013325,FBgn0014026,FBgn0015288,FBgn0015521,FBgn0015756,FBgn0015834,FBgn0016726,FBgn0017545,FBgn0017579,FBgn0020910,FBgn0022023,FBg…	mitochondrion	GO:0005739	6.92845e-06	FBgn0000406,FBgn0000447,FBgn0001124,FBgn0001125,FBgn0001220,FBgn0001223,FBgn0001248,FBgn0002031,FBgn0002719,FBgn0003067,FBgn0003116,FBgn0010217,FBgn0010222,FBgn0010516,FBgn0010551,FBgn0012036,FBgn0015245,FBgn0015268,FBgn0015808,FBgn0016691,FBgn0019644,FBgn0019957,FBgn0020235,FBgn0021765,FBgn0022160,FBgn0022774,FBgn0023507,FBgn0023535,FBgn0023536,FBgn0023537,FBgn0024556,FBgn0025592,FBgn0026576,FBg…	translation factor activity, RNA binding	GO:0008135	0.0014491	FBgn0000559,FBgn0004926,FBgn0015834,FBgn0022023,FBgn0024556,FBgn0025582,FBgn0028737,FBgn0029176,FBgn0030433,FBgn0032198,FBgn0033902,FBgn0034237,FBgn0034258,FBgn0034654,FBgn0035423,FBgn0036258,FBgn0037249,FBgn0037270,FBgn0040227,FBgn0261609,FBgn0263740	ATP-grasp fold	IPR011761	0.0147727	FBgn0000053,FBgn0003189,FBgn0027580,FBgn0033246,FBgn0037643	Translation initiation complex formation	R-DME-72649	1.57498e-15	FBgn0002590,FBgn0002622,FBgn0003517,FBgn0004403,FBgn0004867,FBgn0004926,FBgn0005533,FBgn0010198,FBgn0010265,FBgn0010408,FBgn0010411,FBgn0011284,FBgn0015521,FBgn0015834,FBgn0017545,FBgn0022023,FBgn0025582,FBgn0033555,FBgn0033699,FBgn0033902,FBgn0033912,FBgn0034237,FBgn0034258,FBgn0034654,FBgn0034743,FBgn0036258,FBgn0037249,FBgn0037270,FBgn0038834,FBgn0039300,FBgn0039713,FBgn0039757,FBgn0040227,FBg…	cell development	GO:0048468	2.61343e-16	FBgn0000017,FBgn0000044,FBgn0000108,FBgn0000253,FBgn0000259,FBgn0000273,FBgn0000276,FBgn0000308,FBgn0000479,FBgn0000490,FBgn0000535,FBgn0000546,FBgn0000568,FBgn0000636,FBgn0000659,FBgn0000810,FBgn0001078,FBgn0001122,FBgn0001138,FBgn0001139,FBgn0001235,FBgn0001404,FBgn0002306,FBgn0002521,FBgn0002773,FBgn0003165,FBgn0003209,FBgn0003285,FBgn0003380,FBgn0003435,FBgn0003463,FBgn0003475,FBgn0003896,FBg…	plasma membrane region	GO:0098590	4.6257e-05	FBgn0000017,FBgn0000038,FBgn0000253,FBgn0000273,FBgn0000308,FBgn0000490,FBgn0000546,FBgn0000636,FBgn0002306,FBgn0002921,FBgn0004108,FBgn0004244,FBgn0004369,FBgn0004370,FBgn0004397,FBgn0004435,FBgn0005614,FBgn0010113,FBgn0015609,FBgn0015777,FBgn0025726,FBgn0028397,FBgn0028400,FBgn0028408,FBgn0028875,FBgn0029082,FBgn0032151,FBgn0032840,FBgn0033438,FBgn0034072,FBgn0034789,FBgn0036260,FBgn0037447,FBg…	cation channel activity	GO:0005261	2.17004e-05	FBgn0000038,FBgn0000253,FBgn0000535,FBgn0003380,FBgn0003386,FBgn0005614,FBgn0027556,FBgn0028704,FBgn0028875,FBgn0029761,FBgn0030745,FBgn0032151,FBgn0035505,FBgn0040697,FBgn0053988,FBgn0085426,FBgn0086778,FBgn0259918,FBgn0260499,FBgn0260812,FBgn0261612,FBgn0263257,FBgn0263397,FBgn0264953,FBgn0266347	Neurotransmitter-gated ion-channel ligand-binding domain	IPR006202	0.0245664	FBgn0000038,FBgn0004244,FBgn0028875,FBgn0032151,FBgn0086778,FBgn0264908,FBgn0266347	Highly calcium permeable postsynaptic nicotinic acetylcholine receptors	R-DME-629594	0.0177754	FBgn0028875,FBgn0032151,FBgn0086778,FBgn0266347
translational initiation	GO:0006413	2.02253e-19	FBgn0000100,FBgn0002590,FBgn0002622,FBgn0002626,FBgn0003274,FBgn0003279,FBgn0003517,FBgn0003941,FBgn0003942,FBgn0004403,FBgn0004867,FBgn0004926,FBgn0005533,FBgn0005593,FBgn0010198,FBgn0010265,FBgn0010391,FBgn0010408,FBgn0010411,FBgn0010747,FBgn0011272,FBgn0011284,FBgn0013325,FBgn0014026,FBgn0015288,FBgn0015521,FBgn0015756,FBgn0015834,FBgn0016726,FBgn0017545,FBgn0017579,FBgn0020910,FBgn0022023,FBg…	aminoacyl-tRNA synthetase multienzyme complex	GO:0017101	8.47145e-06	FBgn0002069,FBgn0005674,FBgn0027080,FBgn0027084,FBgn0027086,FBgn0027090,FBgn0027093,FBgn0034401	ligase activity, forming carbon-nitrogen bonds	GO:0016879	0.00280927	FBgn0000052,FBgn0000053,FBgn0000239,FBgn0003189,FBgn0020385,FBgn0020513,FBgn0026565,FBgn0027493,FBgn0027580,FBgn0030407,FBgn0033246,FBgn0085453,FBgn0270926	Peptidase M13, C-terminal domain	IPR018497	0.0187742	FBgn0027578,FBgn0029769,FBgn0030425,FBgn0037727,FBgn0039022,FBgn0039023,FBgn0039024,FBgn0039611,FBgn0039612	Activation of the mRNA upon binding of the cap-binding complex and eIFs, and subsequent binding to 43S	R-DME-72662	2.90855e-15	FBgn0002590,FBgn0002622,FBgn0003517,FBgn0004403,FBgn0004867,FBgn0004926,FBgn0005533,FBgn0010198,FBgn0010265,FBgn0010408,FBgn0010411,FBgn0011284,FBgn0015521,FBgn0015834,FBgn0017545,FBgn0022023,FBgn0025582,FBgn0033555,FBgn0033699,FBgn0033902,FBgn0033912,FBgn0034237,FBgn0034258,FBgn0034654,FBgn0034743,FBgn0036258,FBgn0037249,FBgn0037270,FBgn0038834,FBgn0039300,FBgn0039713,FBgn0039757,FBgn0040227,FBg…	neurogenesis	GO:0022008	2.73949e-16	FBgn0000017,FBgn0000108,FBgn0000253,FBgn0000273,FBgn0000308,FBgn0000479,FBgn0000535,FBgn0000546,FBgn0000636,FBgn0001078,FBgn0001122,FBgn0001138,FBgn0001139,FBgn0001235,FBgn0001404,FBgn0002306,FBgn0002521,FBgn0003165,FBgn0003380,FBgn0003435,FBgn0003896,FBgn0003997,FBgn0004102,FBgn0004108,FBgn0004198,FBgn0004369,FBgn0004370,FBgn0004395,FBgn0004397,FBgn0004435,FBgn0004569,FBgn0004595,FBgn0004618,FBg…	axon terminus	GO:0043679	5.61824e-05	FBgn0003165,FBgn0004242,FBgn0004575,FBgn0004580,FBgn0011288,FBgn0013342,FBgn0013343,FBgn0013759,FBgn0025726,FBgn0032901,FBgn0040505,FBgn0041605,FBgn0086677,FBgn0259168	receptor binding	GO:0005102	2.77113e-05	FBgn0000017,FBgn0000490,FBgn0000636,FBgn0001122,FBgn0004435,FBgn0004569,FBgn0011259,FBgn0013759,FBgn0014135,FBgn0015399,FBgn0023178,FBgn0026375,FBgn0027109,FBgn0027111,FBgn0032048,FBgn0032414,FBgn0032840,FBgn0035023,FBgn0035092,FBgn0035542,FBgn0036752,FBgn0037976,FBgn0039914,FBgn0042201,FBgn0045038,FBgn0083963,FBgn0085407,FBgn0085443,FBgn0264270	Protein-tyrosine phosphatase-like	IPR029021	0.025577	FBgn0004369,FBgn0004370,FBgn0024734,FBgn0028341,FBgn0030976,FBgn0031294,FBgn0036844,FBgn0243512,FBgn0267487	DARPP-32 events	R-DME-180024	0.0249293	FBgn0000273,FBgn0000479,FBgn0022382
alpha-amino acid metabolic process	GO:1901605	4.23149e-18	FBgn0000566,FBgn0001124,FBgn0001125,FBgn0001208,FBgn0003189,FBgn0003308,FBgn0003965,FBgn0013307,FBgn0014031,FBgn0014427,FBgn0014455,FBgn0015781,FBgn0022774,FBgn0023129,FBgn0023535,FBgn0023537,FBgn0026565,FBgn0027945,FBgn0029689,FBgn0029823,FBgn0030482,FBgn0030518,FBgn0030653,FBgn0031824,FBgn0031860,FBgn0032076,FBgn0032224,FBgn0032287,FBgn0032727,FBgn0033543,FBgn0034276,FBgn0035911,FBgn0036157,FBg…	nucleolus	GO:0005730	2.3988e-05	FBgn0002590,FBgn0002626,FBgn0002780,FBgn0003062,FBgn0004867,FBgn0010265,FBgn0010408,FBgn0010411,FBgn0011824,FBgn0013269,FBgn0013325,FBgn0015393,FBgn0015527,FBgn0016685,FBgn0019938,FBgn0020909,FBgn0025366,FBgn0026079,FBgn0026196,FBgn0028473,FBgn0028744,FBgn0029148,FBgn0029714,FBgn0033454,FBgn0033699,FBgn0033741,FBgn0034243,FBgn0036916,FBgn0037073,FBgn0037137,FBgn0038146,FBgn0038473,FBgn0038964,FBg…	nucleotide binding	GO:0000166	0.00330599	FBgn0000053,FBgn0000056,FBgn0000150,FBgn0000239,FBgn0000559,FBgn0001092,FBgn0001187,FBgn0001220,FBgn0001248,FBgn0002069,FBgn0002719,FBgn0002905,FBgn0003067,FBgn0003189,FBgn0003308,FBgn0003676,FBgn0003731,FBgn0003890,FBgn0004057,FBgn0005278,FBgn0005674,FBgn0010217,FBgn0010241,FBgn0010246,FBgn0010339,FBgn0010391,FBgn0010516,FBgn0010638,FBgn0010747,FBgn0011205,FBgn0011703,FBgn0012034,FBgn0014455,FBg…	Short-chain dehydrogenase/reductase SDR	IPR002347	0.0189658	FBgn0000055,FBgn0000056,FBgn0021765,FBgn0029648,FBgn0030026,FBgn0030073,FBgn0030731,FBgn0030968,FBgn0031360,FBgn0035964,FBgn0037354,FBgn0039040,FBgn0039537,FBgn0040349,FBgn0051548	Ribosomal scanning and start codon recognition	R-DME-72702	2.90855e-15	FBgn0002590,FBgn0002622,FBgn0003517,FBgn0004403,FBgn0004867,FBgn0004926,FBgn0005533,FBgn0010198,FBgn0010265,FBgn0010408,FBgn0010411,FBgn0011284,FBgn0015521,FBgn0015834,FBgn0017545,FBgn0022023,FBgn0025582,FBgn0033555,FBgn0033699,FBgn0033902,FBgn0033912,FBgn0034237,FBgn0034258,FBgn0034654,FBgn0034743,FBgn0036258,FBgn0037249,FBgn0037270,FBgn0038834,FBgn0039300,FBgn0039713,FBgn0039757,FBgn0040227,FBg…	cell morphogenesis involved in neuron differentiation	GO:0048667	6.40558e-16	FBgn0000017,FBgn0000253,FBgn0000308,FBgn0000479,FBgn0000546,FBgn0000636,FBgn0001078,FBgn0001122,FBgn0001138,FBgn0001139,FBgn0001404,FBgn0002306,FBgn0002521,FBgn0003165,FBgn0003380,FBgn0003435,FBgn0003896,FBgn0003997,FBgn0004102,FBgn0004108,FBgn0004198,FBgn0004369,FBgn0004370,FBgn0004435,FBgn0004595,FBgn0004635,FBgn0004795,FBgn0004838,FBgn0004880,FBgn0010113,FBgn0010300,FBgn0010415,FBgn0010473,FBg…	neuron projection terminus	GO:0044306	5.61824e-05	FBgn0003165,FBgn0004242,FBgn0004575,FBgn0004580,FBgn0011288,FBgn0013342,FBgn0013343,FBgn0013759,FBgn0025726,FBgn0032901,FBgn0040505,FBgn0041605,FBgn0086677,FBgn0259168	cation transmembrane transporter activity	GO:0008324	8.92203e-05	FBgn0000038,FBgn0000253,FBgn0000535,FBgn0002921,FBgn0003218,FBgn0003380,FBgn0003386,FBgn0005614,FBgn0013673,FBgn0013995,FBgn0015777,FBgn0027556,FBgn0028704,FBgn0028875,FBgn0029663,FBgn0029761,FBgn0029762,FBgn0030745,FBgn0032151,FBgn0035505,FBgn0039561,FBgn0040697,FBgn0051100,FBgn0053181,FBgn0053988,FBgn0085426,FBgn0086778,FBgn0259918,FBgn0260499,FBgn0260812,FBgn0260964,FBgn0261612,FBgn0262476,FBg…					Neurotransmitter receptors and postsynaptic signal transmission	R-DME-112314	0.0256364	FBgn0000038,FBgn0000253,FBgn0020386,FBgn0028875,FBgn0032151,FBgn0086778,FBgn0260446,FBgn0265784,FBgn0266347
translational elongation	GO:0006414	1.8743e-17	FBgn0000100,FBgn0000559,FBgn0002590,FBgn0002622,FBgn0002626,FBgn0003274,FBgn0003279,FBgn0003517,FBgn0003941,FBgn0003942,FBgn0004403,FBgn0004867,FBgn0005533,FBgn0005593,FBgn0010198,FBgn0010265,FBgn0010391,FBgn0010408,FBgn0010411,FBgn0010747,FBgn0011272,FBgn0011284,FBgn0013325,FBgn0014026,FBgn0015288,FBgn0015521,FBgn0015756,FBgn0016726,FBgn0017545,FBgn0017579,FBgn0020910,FBgn0023170,FBgn0024556,FBg…	vacuole	GO:0005773	2.46909e-05	FBgn0010391,FBgn0010470,FBgn0010638,FBgn0011016,FBgn0011336,FBgn0014002,FBgn0014469,FBgn0014868,FBgn0015622,FBgn0019925,FBgn0021795,FBgn0027095,FBgn0027582,FBgn0028327,FBgn0029709,FBgn0029736,FBgn0029737,FBgn0030306,FBgn0030521,FBgn0030990,FBgn0031106,FBgn0031245,FBgn0031260,FBgn0031544,FBgn0031590,FBgn0032015,FBgn0032358,FBgn0032398,FBgn0033247,FBgn0033906,FBgn0034110,FBgn0034277,FBgn0034753,FBg…	nucleoside phosphate binding	GO:1901265	0.00330599	FBgn0000053,FBgn0000056,FBgn0000150,FBgn0000239,FBgn0000559,FBgn0001092,FBgn0001187,FBgn0001220,FBgn0001248,FBgn0002069,FBgn0002719,FBgn0002905,FBgn0003067,FBgn0003189,FBgn0003308,FBgn0003676,FBgn0003731,FBgn0003890,FBgn0004057,FBgn0005278,FBgn0005674,FBgn0010217,FBgn0010241,FBgn0010246,FBgn0010339,FBgn0010391,FBgn0010516,FBgn0010638,FBgn0010747,FBgn0011205,FBgn0011703,FBgn0012034,FBgn0014455,FBg…	Peptidase M13	IPR000718	0.0189735	FBgn0027578,FBgn0029769,FBgn0030425,FBgn0037230,FBgn0037727,FBgn0039022,FBgn0039023,FBgn0039024,FBgn0039611,FBgn0039612	Metabolism of carbohydrates	R-DME-71387	3.16966e-11	FBgn0001124,FBgn0001125,FBgn0001187,FBgn0003067,FBgn0003074,FBgn0004057,FBgn0004654,FBgn0014417,FBgn0020251,FBgn0020389,FBgn0022359,FBgn0023477,FBgn0024230,FBgn0024289,FBgn0027580,FBgn0027610,FBgn0027611,FBgn0027621,FBgn0028646,FBgn0029737,FBgn0029765,FBgn0030239,FBgn0030737,FBgn0030968,FBgn0031428,FBgn0031717,FBgn0032253,FBgn0032820,FBgn0033377,FBgn0033735,FBgn0033949,FBgn0034356,FBgn0034538,FBg…	cellular component morphogenesis	GO:0032989	7.97502e-16	FBgn0000017,FBgn0000108,FBgn0000253,FBgn0000308,FBgn0000479,FBgn0000490,FBgn0000546,FBgn0000636,FBgn0001078,FBgn0001122,FBgn0001138,FBgn0001139,FBgn0001404,FBgn0002306,FBgn0002521,FBgn0002773,FBgn0002921,FBgn0003165,FBgn0003209,FBgn0003380,FBgn0003435,FBgn0003896,FBgn0003997,FBgn0004102,FBgn0004108,FBgn0004117,FBgn0004169,FBgn0004198,FBgn0004369,FBgn0004370,FBgn0004397,FBgn0004435,FBgn0004595,FBg…	integral component of plasma membrane	GO:0005887	5.73929e-05	FBgn0000038,FBgn0000535,FBgn0000636,FBgn0002306,FBgn0002921,FBgn0003218,FBgn0003380,FBgn0003386,FBgn0005614,FBgn0010473,FBgn0011582,FBgn0015399,FBgn0015400,FBgn0015609,FBgn0015777,FBgn0015872,FBgn0028704,FBgn0028875,FBgn0029663,FBgn0029762,FBgn0029814,FBgn0029837,FBgn0029974,FBgn0032151,FBgn0032946,FBgn0034286,FBgn0035975,FBgn0036260,FBgn0038063,FBgn0038498,FBgn0038880,FBgn0038980,FBgn0040726,FBg…	translation repressor activity	GO:0030371	0.00013377	FBgn0003165,FBgn0010300,FBgn0011224,FBgn0011666,FBgn0053100,FBgn0260400,FBgn0264270					Collagen degradation	R-DME-1442490	0.0274808	FBgn0033438,FBgn0036381,FBgn0259244,FBgn0260660
single-organism catabolic process	GO:0044712	5.24991e-16	FBgn0000055,FBgn0001092,FBgn0001125,FBgn0001187,FBgn0001208,FBgn0001220,FBgn0001248,FBgn0003074,FBgn0003076,FBgn0003116,FBgn0003308,FBgn0003748,FBgn0003965,FBgn0010516,FBgn0010591,FBgn0014031,FBgn0014455,FBgn0023535,FBgn0025454,FBgn0027572,FBgn0027621,FBgn0027945,FBgn0028479,FBgn0028686,FBgn0029689,FBgn0029969,FBgn0030607,FBgn0030653,FBgn0030731,FBgn0030828,FBgn0031489,FBgn0031824,FBgn0032161,FBg…	peroxisome	GO:0005777	8.02259e-05	FBgn0001124,FBgn0001248,FBgn0014031,FBgn0015808,FBgn0027572,FBgn0028479,FBgn0029969,FBgn0030731,FBgn0031282,FBgn0031703,FBgn0031860,FBgn0033543,FBgn0033564,FBgn0034488,FBgn0034628,FBgn0034629,FBgn0037440,FBgn0037819,FBgn0039537,FBgn0061356,FBgn0262782,FBgn0263120	small molecule binding	GO:0036094	0.0034923	FBgn0000053,FBgn0000056,FBgn0000150,FBgn0000239,FBgn0000559,FBgn0000566,FBgn0001092,FBgn0001124,FBgn0001125,FBgn0001187,FBgn0001220,FBgn0001248,FBgn0002069,FBgn0002719,FBgn0002905,FBgn0003067,FBgn0003189,FBgn0003308,FBgn0003676,FBgn0003731,FBgn0003890,FBgn0004057,FBgn0005278,FBgn0005674,FBgn0010217,FBgn0010241,FBgn0010246,FBgn0010339,FBgn0010391,FBgn0010516,FBgn0010591,FBgn0010638,FBgn0010747,FBg…	Acyl-CoA dehydrogenase/oxidase C-terminal	IPR009075	0.0191879	FBgn0027572,FBgn0031824,FBgn0034628,FBgn0034629,FBgn0035911,FBgn0036824,FBgn0038742	Branched-chain amino acid catabolism	R-DME-70895	2.02956e-08	FBgn0014903,FBgn0021765,FBgn0023537,FBgn0029823,FBgn0029969,FBgn0030482,FBgn0030575,FBgn0030612,FBgn0034390,FBgn0035911,FBgn0036824,FBgn0037709,FBgn0038326,FBgn0038795,FBgn0042083	neuron projection development	GO:0031175	8.97042e-16	FBgn0000017,FBgn0000108,FBgn0000253,FBgn0000273,FBgn0000308,FBgn0000479,FBgn0000546,FBgn0000636,FBgn0001078,FBgn0001122,FBgn0001138,FBgn0001139,FBgn0001404,FBgn0002306,FBgn0002521,FBgn0003165,FBgn0003380,FBgn0003435,FBgn0003896,FBgn0003997,FBgn0004102,FBgn0004108,FBgn0004198,FBgn0004369,FBgn0004370,FBgn0004397,FBgn0004435,FBgn0004595,FBgn0004635,FBgn0004795,FBgn0004838,FBgn0004880,FBgn0005775,FBg…	axon	GO:0030424	8.37316e-05	FBgn0000017,FBgn0003165,FBgn0004242,FBgn0004244,FBgn0004369,FBgn0004370,FBgn0004575,FBgn0004580,FBgn0005775,FBgn0010113,FBgn0011288,FBgn0013342,FBgn0013343,FBgn0013759,FBgn0015609,FBgn0015774,FBgn0015777,FBgn0025726,FBgn0032840,FBgn0032901,FBgn0040505,FBgn0041097,FBgn0041605,FBgn0086677,FBgn0259168,FBgn0266579	RNA polymerase II regulatory region sequence-specific DNA binding	GO:0000977	0.000287193	FBgn0000179,FBgn0000439,FBgn0000448,FBgn0000546,FBgn0000568,FBgn0000659,FBgn0001078,FBgn0001138,FBgn0001235,FBgn0002521,FBgn0002723,FBgn0003896,FBgn0004102,FBgn0004198,FBgn0004595,FBgn0004618,FBgn0004795,FBgn0011481,FBgn0011766,FBgn0015664,FBgn0042696,FBgn0085432,FBgn0086680,FBgn0261703,FBgn0261793,FBgn0262477,FBgn0265193					Reelin signalling pathway	R-DME-8866376	0.0274808	FBgn0003285,FBgn0024189,FBgn0028369,FBgn0029082
translational termination	GO:0006415	1.06507e-15	FBgn0000100,FBgn0002590,FBgn0002622,FBgn0002626,FBgn0003274,FBgn0003279,FBgn0003517,FBgn0003941,FBgn0003942,FBgn0004403,FBgn0004867,FBgn0005533,FBgn0005593,FBgn0010198,FBgn0010265,FBgn0010391,FBgn0010408,FBgn0010411,FBgn0010747,FBgn0011272,FBgn0011284,FBgn0013325,FBgn0014026,FBgn0015288,FBgn0015521,FBgn0015756,FBgn0016726,FBgn0017545,FBgn0017579,FBgn0020910,FBgn0023170,FBgn0024733,FBgn0025700,FBg…	microbody	GO:0042579	8.02259e-05	FBgn0001124,FBgn0001248,FBgn0014031,FBgn0015808,FBgn0027572,FBgn0028479,FBgn0029969,FBgn0030731,FBgn0031282,FBgn0031703,FBgn0031860,FBgn0033543,FBgn0033564,FBgn0034488,FBgn0034628,FBgn0034629,FBgn0037440,FBgn0037819,FBgn0039537,FBgn0061356,FBgn0262782,FBgn0263120	translation initiation factor activity	GO:0003743	0.00597393	FBgn0004926,FBgn0015834,FBgn0022023,FBgn0025582,FBgn0030433,FBgn0033902,FBgn0034237,FBgn0034258,FBgn0034654,FBgn0035423,FBgn0036258,FBgn0037249,FBgn0037270,FBgn0040227,FBgn0261609,FBgn0263740	Acyl-CoA dehydrogenase/oxidase, N-terminal and middle domain	IPR009100	0.0191879	FBgn0027572,FBgn0031824,FBgn0034628,FBgn0034629,FBgn0035911,FBgn0036824,FBgn0038742	Valine, leucine and isoleucine degradation	280	3.85957e-08	FBgn0010611,FBgn0012036,FBgn0021765,FBgn0023537,FBgn0028479,FBgn0029969,FBgn0030482,FBgn0030612,FBgn0034390,FBgn0035298,FBgn0035911,FBgn0036824,FBgn0036857,FBgn0037709,FBgn0038326,FBgn0038742,FBgn0040064,FBgn0042083,FBgn0051075	behavior	GO:0007610	1.99566e-15	FBgn0000017,FBgn0000108,FBgn0000259,FBgn0000273,FBgn0000479,FBgn0000535,FBgn0000546,FBgn0000636,FBgn0001078,FBgn0001404,FBgn0002921,FBgn0003165,FBgn0003380,FBgn0003423,FBgn0003435,FBgn0004102,FBgn0004168,FBgn0004242,FBgn0004244,FBgn0004370,FBgn0004435,FBgn0004516,FBgn0004575,FBgn0004595,FBgn0004635,FBgn0004795,FBgn0005626,FBgn0010313,FBgn0010473,FBgn0010825,FBgn0011206,FBgn0011259,FBgn0011582,FBg…	membrane	GO:0016020	9.01741e-05	FBgn0000017,FBgn0000038,FBgn0000044,FBgn0000108,FBgn0000253,FBgn0000273,FBgn0000308,FBgn0000490,FBgn0000535,FBgn0000546,FBgn0000636,FBgn0001122,FBgn0001404,FBgn0002306,FBgn0002921,FBgn0003209,FBgn0003218,FBgn0003285,FBgn0003380,FBgn0003386,FBgn0003463,FBgn0004108,FBgn0004168,FBgn0004198,FBgn0004242,FBgn0004244,FBgn0004369,FBgn0004370,FBgn0004397,FBgn0004435,FBgn0004595,FBgn0004635,FBgn0004910,FBg…	RNA polymerase II regulatory region DNA binding	GO:0001012	0.000355291	FBgn0000179,FBgn0000439,FBgn0000448,FBgn0000546,FBgn0000568,FBgn0000659,FBgn0001078,FBgn0001138,FBgn0001235,FBgn0002521,FBgn0002723,FBgn0003896,FBgn0004102,FBgn0004198,FBgn0004595,FBgn0004618,FBgn0004795,FBgn0011481,FBgn0011766,FBgn0015664,FBgn0042696,FBgn0085432,FBgn0086680,FBgn0261703,FBgn0261793,FBgn0262477,FBgn0265193					Ca2+ pathway	R-DME-4086398	0.0277906	FBgn0000253,FBgn0001122,FBgn0011817,FBgn0030505,FBgn0085432
small molecule catabolic process	GO:0044282	1.1432e-15	FBgn0000055,FBgn0001125,FBgn0001208,FBgn0001248,FBgn0003076,FBgn0003965,FBgn0010516,FBgn0014031,FBgn0014455,FBgn0023535,FBgn0027572,FBgn0027945,FBgn0028479,FBgn0029689,FBgn0029969,FBgn0030653,FBgn0030731,FBgn0031824,FBgn0032161,FBgn0032162,FBgn0032287,FBgn0032945,FBgn0034276,FBgn0034488,FBgn0034628,FBgn0034629,FBgn0035298,FBgn0035679,FBgn0035911,FBgn0036208,FBgn0036262,FBgn0037440,FBgn0037709,FBg…	multi-eIF complex	GO:0043614	0.000269238	FBgn0004926,FBgn0035423,FBgn0037249,FBgn0261609,FBgn0263740	glucose-6-phosphate dehydrogenase activity	GO:0004345	0.00610882	FBgn0004057,FBgn0004654,FBgn0023477,FBgn0030239,FBgn0050499	Acyl-CoA dehydrogenase/oxidase, N-terminal	IPR013786	0.0191879	FBgn0027572,FBgn0031824,FBgn0034628,FBgn0034629,FBgn0035911,FBgn0036824,FBgn0038742	Major pathway of rRNA processing in the nucleolus and cytosol	R-DME-6791226	1.33486e-07	FBgn0002590,FBgn0002622,FBgn0003517,FBgn0004403,FBgn0004867,FBgn0005533,FBgn0010198,FBgn0010265,FBgn0010408,FBgn0010411,FBgn0011284,FBgn0015393,FBgn0015521,FBgn0017545,FBgn0020909,FBgn0026196,FBgn0028744,FBgn0029714,FBgn0030177,FBgn0033454,FBgn0033555,FBgn0033699,FBgn0033912,FBgn0034743,FBgn0036187,FBgn0036686,FBgn0036916,FBgn0037073,FBgn0038146,FBgn0038473,FBgn0038834,FBgn0038964,FBgn0039300,FBg…	regulation of multicellular organismal process	GO:0051239	2.29911e-15	FBgn0000017,FBgn0000273,FBgn0000308,FBgn0000490,FBgn0000535,FBgn0000546,FBgn0000568,FBgn0000659,FBgn0001122,FBgn0001138,FBgn0001235,FBgn0001404,FBgn0003165,FBgn0003209,FBgn0003285,FBgn0003380,FBgn0003997,FBgn0004102,FBgn0004168,FBgn0004169,FBgn0004242,FBgn0004244,FBgn0004395,FBgn0004435,FBgn0004569,FBgn0004595,FBgn0004876,FBgn0005626,FBgn0010113,FBgn0010300,FBgn0010415,FBgn0010473,FBgn0011259,FBg…	sarcomere	GO:0030017	0.000148969	FBgn0004117,FBgn0004169,FBgn0005666,FBgn0033926,FBgn0034072,FBgn0038294,FBgn0039897,FBgn0052311,FBgn0063485,FBgn0261836,FBgn0265487,FBgn0265991	translation regulator activity	GO:0045182	0.00035587	FBgn0003165,FBgn0010300,FBgn0011224,FBgn0011666,FBgn0053100,FBgn0260400,FBgn0264270					Axon guidance	R-DME-422475	0.0310416	FBgn0000017,FBgn0000044,FBgn0000046,FBgn0003285,FBgn0010415,FBgn0014135,FBgn0015774,FBgn0020767,FBgn0024189,FBgn0027492,FBgn0028369,FBgn0029082,FBgn0034789,FBgn0036844,FBgn0041097,FBgn0259244,FBgn0259680,FBgn0264273,FBgn0264975,FBgn0265784
ribonucleoprotein complex assembly	GO:0022618	1.15606e-15	FBgn0000100,FBgn0002590,FBgn0002622,FBgn0002626,FBgn0003274,FBgn0003279,FBgn0003517,FBgn0003941,FBgn0003942,FBgn0004403,FBgn0004867,FBgn0004926,FBgn0005533,FBgn0005593,FBgn0010198,FBgn0010265,FBgn0010391,FBgn0010408,FBgn0010411,FBgn0010747,FBgn0011272,FBgn0011284,FBgn0013325,FBgn0014026,FBgn0015288,FBgn0015521,FBgn0015756,FBgn0015834,FBgn0016726,FBgn0017545,FBgn0017579,FBgn0020910,FBgn0022023,FBg…	intracellular	GO:0005622	0.000414003	FBgn0000052,FBgn0000053,FBgn0000055,FBgn0000100,FBgn0000150,FBgn0000239,FBgn0000330,FBgn0000406,FBgn0000447,FBgn0000477,FBgn0000504,FBgn0000536,FBgn0000559,FBgn0000566,FBgn0000615,FBgn0000964,FBgn0000996,FBgn0001124,FBgn0001125,FBgn0001187,FBgn0001220,FBgn0001223,FBgn0001248,FBgn0001258,FBgn0002022,FBgn0002031,FBgn0002069,FBgn0002284,FBgn0002590,FBgn0002622,FBgn0002626,FBgn0002719,FBgn0002780,FBg…	phosphogluconate dehydrogenase (decarboxylating) activity	GO:0004616	0.00610882	FBgn0004654,FBgn0023477,FBgn0030239,FBgn0034390,FBgn0050499	WHEP-TRS domain	IPR000738	0.0195637	FBgn0005674,FBgn0027087,FBgn0027088,FBgn0034401	rRNA processing	R-DME-72312	1.33486e-07	FBgn0002590,FBgn0002622,FBgn0003517,FBgn0004403,FBgn0004867,FBgn0005533,FBgn0010198,FBgn0010265,FBgn0010408,FBgn0010411,FBgn0011284,FBgn0015393,FBgn0015521,FBgn0017545,FBgn0020909,FBgn0026196,FBgn0028744,FBgn0029714,FBgn0030177,FBgn0033454,FBgn0033555,FBgn0033699,FBgn0033912,FBgn0034743,FBgn0036187,FBgn0036686,FBgn0036916,FBgn0037073,FBgn0038146,FBgn0038473,FBgn0038834,FBgn0038964,FBgn0039300,FBg…	cell projection morphogenesis	GO:0048858	3.36438e-15	FBgn0000017,FBgn0000108,FBgn0000253,FBgn0000308,FBgn0000479,FBgn0000546,FBgn0000636,FBgn0001078,FBgn0001122,FBgn0001138,FBgn0001139,FBgn0001404,FBgn0002306,FBgn0002521,FBgn0003165,FBgn0003380,FBgn0003435,FBgn0003896,FBgn0003997,FBgn0004102,FBgn0004108,FBgn0004198,FBgn0004369,FBgn0004370,FBgn0004397,FBgn0004435,FBgn0004595,FBgn0004635,FBgn0004795,FBgn0004838,FBgn0004880,FBgn0010113,FBgn0010300,FBg…	axon part	GO:0033267	0.000245816	FBgn0003165,FBgn0004242,FBgn0004575,FBgn0004580,FBgn0005775,FBgn0011288,FBgn0013342,FBgn0013343,FBgn0013759,FBgn0015774,FBgn0025726,FBgn0032901,FBgn0040505,FBgn0041605,FBgn0086677,FBgn0259168	acetylcholine-gated cation-selective channel activity	GO:0022848	0.000363001	FBgn0000038,FBgn0028875,FBgn0032151,FBgn0086778,FBgn0260499,FBgn0266347					Developmental Biology	R-DME-1266738	0.0325596	FBgn0000017,FBgn0000044,FBgn0000046,FBgn0003285,FBgn0010415,FBgn0013343,FBgn0014135,FBgn0015774,FBgn0020767,FBgn0024189,FBgn0027492,FBgn0028369,FBgn0029082,FBgn0034720,FBgn0034789,FBgn0036844,FBgn0041097,FBgn0259110,FBgn0259244,FBgn0259680,FBgn0264273,FBgn0264975,FBgn0265784
ribonucleoprotein complex subunit organization	GO:0071826	2.35122e-15	FBgn0000100,FBgn0002590,FBgn0002622,FBgn0002626,FBgn0003274,FBgn0003279,FBgn0003517,FBgn0003941,FBgn0003942,FBgn0004403,FBgn0004867,FBgn0004926,FBgn0005533,FBgn0005593,FBgn0010198,FBgn0010265,FBgn0010391,FBgn0010408,FBgn0010411,FBgn0010747,FBgn0011272,FBgn0011284,FBgn0013325,FBgn0014026,FBgn0015288,FBgn0015521,FBgn0015756,FBgn0015834,FBgn0016726,FBgn0017545,FBgn0017579,FBgn0020910,FBgn0022023,FBg…	Golgi-associated vesicle	GO:0005798	0.000686252	FBgn0008635,FBgn0024509,FBgn0025724,FBgn0025725,FBgn0028969,FBgn0031260,FBgn0031990,FBgn0033339,FBgn0038947,FBgn0040512,FBgn0262125,FBgn0264978,FBgn0267330	lyase activity	GO:0016829	0.00856772	FBgn0000566,FBgn0001092,FBgn0001187,FBgn0002622,FBgn0003067,FBgn0003074,FBgn0004852,FBgn0010591,FBgn0013307,FBgn0019932,FBgn0020513,FBgn0022710,FBgn0024957,FBgn0026576,FBgn0027621,FBgn0028336,FBgn0028479,FBgn0030518,FBgn0030731,FBgn0032076,FBgn0032161,FBgn0032162,FBgn0033428,FBgn0033735,FBgn0034356,FBgn0036975,FBgn0038467,FBgn0039094,FBgn0086355,FBgn0250906,FBgn0260388,FBgn0283427	Ribosomal protein L7Ae/L30e/S12e/Gadd45	IPR004038	0.0220718	FBgn0014026,FBgn0015393,FBgn0029148,FBgn0086710,FBgn0260441	rRNA processing in the nucleus and cytosol	R-DME-8868773	1.33486e-07	FBgn0002590,FBgn0002622,FBgn0003517,FBgn0004403,FBgn0004867,FBgn0005533,FBgn0010198,FBgn0010265,FBgn0010408,FBgn0010411,FBgn0011284,FBgn0015393,FBgn0015521,FBgn0017545,FBgn0020909,FBgn0026196,FBgn0028744,FBgn0029714,FBgn0030177,FBgn0033454,FBgn0033555,FBgn0033699,FBgn0033912,FBgn0034743,FBgn0036187,FBgn0036686,FBgn0036916,FBgn0037073,FBgn0038146,FBgn0038473,FBgn0038834,FBgn0038964,FBgn0039300,FBg…	plasma membrane bounded cell projection morphogenesis	GO:0120039	3.36438e-15	FBgn0000017,FBgn0000108,FBgn0000253,FBgn0000308,FBgn0000479,FBgn0000546,FBgn0000636,FBgn0001078,FBgn0001122,FBgn0001138,FBgn0001139,FBgn0001404,FBgn0002306,FBgn0002521,FBgn0003165,FBgn0003380,FBgn0003435,FBgn0003896,FBgn0003997,FBgn0004102,FBgn0004108,FBgn0004198,FBgn0004369,FBgn0004370,FBgn0004397,FBgn0004435,FBgn0004595,FBgn0004635,FBgn0004795,FBgn0004838,FBgn0004880,FBgn0010113,FBgn0010300,FBg…	synaptic vesicle	GO:0008021	0.000255093	FBgn0004242,FBgn0004575,FBgn0005586,FBgn0013342,FBgn0013343,FBgn0025726,FBgn0028400,FBgn0031424,FBgn0035756,FBgn0053547,FBgn0083228,FBgn0086677,FBgn0086913,FBgn0260964	postsynaptic neurotransmitter receptor activity	GO:0098960	0.000363001	FBgn0000038,FBgn0028875,FBgn0032151,FBgn0086778,FBgn0260499,FBgn0266347					Extracellular matrix organization	R-DME-1474244	0.0326343	FBgn0000490,FBgn0010415,FBgn0014135,FBgn0031850,FBgn0033438,FBgn0036381,FBgn0259244,FBgn0260660,FBgn0261822
organic acid catabolic process	GO:0016054	2.82414e-14	FBgn0001125,FBgn0001208,FBgn0001248,FBgn0003965,FBgn0010516,FBgn0014031,FBgn0014455,FBgn0023535,FBgn0027572,FBgn0027945,FBgn0028479,FBgn0029689,FBgn0029969,FBgn0030653,FBgn0030731,FBgn0031824,FBgn0032161,FBgn0032162,FBgn0032287,FBgn0032945,FBgn0034276,FBgn0034488,FBgn0034628,FBgn0034629,FBgn0035911,FBgn0036208,FBgn0037440,FBgn0037709,FBgn0037801,FBgn0037819,FBgn0039094,FBgn0040064,FBgn0040349,FBg…	endoplasmic reticulum	GO:0005783	0.000786393	FBgn0002022,FBgn0002936,FBgn0003656,FBgn0010391,FBgn0010470,FBgn0010638,FBgn0011016,FBgn0011336,FBgn0014002,FBgn0014868,FBgn0015622,FBgn0020251,FBgn0021795,FBgn0025615,FBgn0027073,FBgn0027095,FBgn0027579,FBgn0028327,FBgn0029906,FBgn0030306,FBgn0031260,FBgn0031544,FBgn0032015,FBgn0032394,FBgn0032398,FBgn0032480,FBgn0033187,FBgn0033339,FBgn0034087,FBgn0034176,FBgn0034277,FBgn0035375,FBgn0035947,FBg…	gluconolactonase activity	GO:0004341	0.00888187	FBgn0004654,FBgn0023477,FBgn0030239,FBgn0050499	ABC transporter, conserved site	IPR017871	0.0236811	FBgn0010241,FBgn0023536,FBgn0030321,FBgn0030403,FBgn0031516,FBgn0032026,FBgn0032167,FBgn0036888,FBgn0039207,FBgn0051793,FBgn0086706,FBgn0263316,FBgn0264494	Fatty acid metabolism	71	1.54572e-07	FBgn0000055,FBgn0011768,FBgn0012036,FBgn0027348,FBgn0027572,FBgn0028479,FBgn0029969,FBgn0031703,FBgn0031824,FBgn0034628,FBgn0034629,FBgn0036824,FBgn0036857,FBgn0038742,FBgn0040064,FBgn0051075,FBgn0261862,FBgn0263120	cell morphogenesis	GO:0000902	4.65909e-15	FBgn0000017,FBgn0000108,FBgn0000253,FBgn0000308,FBgn0000479,FBgn0000490,FBgn0000546,FBgn0000636,FBgn0001078,FBgn0001122,FBgn0001138,FBgn0001139,FBgn0001404,FBgn0002306,FBgn0002521,FBgn0002921,FBgn0003165,FBgn0003209,FBgn0003380,FBgn0003435,FBgn0003896,FBgn0003997,FBgn0004102,FBgn0004108,FBgn0004198,FBgn0004369,FBgn0004370,FBgn0004397,FBgn0004435,FBgn0004595,FBgn0004635,FBgn0004795,FBgn0004838,FBg…	exocytic vesicle	GO:0070382	0.000260452	FBgn0004242,FBgn0004575,FBgn0005586,FBgn0013342,FBgn0013343,FBgn0025726,FBgn0028400,FBgn0031424,FBgn0035756,FBgn0053547,FBgn0083228,FBgn0086677,FBgn0086913,FBgn0260964	neurotransmitter receptor activity involved in regulation of postsynaptic membrane potential	GO:0099529	0.000363001	FBgn0000038,FBgn0028875,FBgn0032151,FBgn0086778,FBgn0260499,FBgn0266347					PLC beta mediated events	R-DME-112043	0.0370816	FBgn0000253,FBgn0000273,FBgn0001122,FBgn0022382,FBgn0259680,FBgn0262738
carboxylic acid catabolic process	GO:0046395	2.82414e-14	FBgn0001125,FBgn0001208,FBgn0001248,FBgn0003965,FBgn0010516,FBgn0014031,FBgn0014455,FBgn0023535,FBgn0027572,FBgn0027945,FBgn0028479,FBgn0029689,FBgn0029969,FBgn0030653,FBgn0030731,FBgn0031824,FBgn0032161,FBgn0032162,FBgn0032287,FBgn0032945,FBgn0034276,FBgn0034488,FBgn0034628,FBgn0034629,FBgn0035911,FBgn0036208,FBgn0037440,FBgn0037709,FBgn0037801,FBgn0037819,FBgn0039094,FBgn0040064,FBgn0040349,FBg…	Golgi-associated vesicle membrane	GO:0030660	0.00103276	FBgn0008635,FBgn0024509,FBgn0025724,FBgn0025725,FBgn0028969,FBgn0031260,FBgn0033339,FBgn0038947,FBgn0040512,FBgn0262125	transaminase activity	GO:0008483	0.00919344	FBgn0001124,FBgn0001125,FBgn0014031,FBgn0014427,FBgn0022774,FBgn0030482,FBgn0037955	Translation protein, beta-barrel domain	IPR009000	0.0268821	FBgn0000559,FBgn0011824,FBgn0020910,FBgn0024556,FBgn0027094,FBgn0027836,FBgn0037328,FBgn0037391,FBgn0263740	Nucleobase biosynthesis	R-DME-8956320	4.5716e-07	FBgn0000052,FBgn0000053,FBgn0000239,FBgn0000447,FBgn0003189,FBgn0003204,FBgn0020513,FBgn0027493,FBgn0038467,FBgn0039241,FBgn0041194	animal organ development	GO:0048513	4.80596e-15	FBgn0000017,FBgn0000044,FBgn0000108,FBgn0000179,FBgn0000253,FBgn0000259,FBgn0000273,FBgn0000276,FBgn0000289,FBgn0000308,FBgn0000439,FBgn0000448,FBgn0000489,FBgn0000490,FBgn0000546,FBgn0000633,FBgn0000659,FBgn0001078,FBgn0001122,FBgn0001138,FBgn0001235,FBgn0001994,FBgn0002921,FBgn0003209,FBgn0003285,FBgn0003463,FBgn0003896,FBgn0003997,FBgn0004102,FBgn0004117,FBgn0004169,FBgn0004198,FBgn0004395,FBg…	plasma membrane bounded cell projection	GO:0120025	0.000264479	FBgn0000017,FBgn0000253,FBgn0000273,FBgn0000308,FBgn0000490,FBgn0000546,FBgn0003165,FBgn0003218,FBgn0004242,FBgn0004244,FBgn0004369,FBgn0004370,FBgn0004435,FBgn0004575,FBgn0004580,FBgn0005614,FBgn0005775,FBgn0010113,FBgn0011288,FBgn0013342,FBgn0013343,FBgn0013759,FBgn0015609,FBgn0015774,FBgn0015777,FBgn0025726,FBgn0032840,FBgn0032901,FBgn0033438,FBgn0034789,FBgn0036260,FBgn0037447,FBgn0037614,FBg…	transmitter-gated ion channel activity involved in regulation of postsynaptic membrane potential	GO:1904315	0.000363001	FBgn0000038,FBgn0028875,FBgn0032151,FBgn0086778,FBgn0260499,FBgn0266347					Hemostasis	R-DME-109582	0.0378865	FBgn0000253,FBgn0000273,FBgn0004397,FBgn0004435,FBgn0013995,FBgn0014010,FBgn0015399,FBgn0015400,FBgn0015777,FBgn0020386,FBgn0022382,FBgn0031850,FBgn0032946,FBgn0033438,FBgn0033574,FBgn0051140,FBgn0052264,FBgn0052683,FBgn0085413,FBgn0259680,FBgn0261822,FBgn0264975,FBgn0267487
cellular protein complex disassembly	GO:0043624	5.3309e-14	FBgn0000100,FBgn0002590,FBgn0002622,FBgn0002626,FBgn0003274,FBgn0003279,FBgn0003517,FBgn0003941,FBgn0003942,FBgn0004403,FBgn0004867,FBgn0005533,FBgn0005593,FBgn0010198,FBgn0010265,FBgn0010391,FBgn0010408,FBgn0010411,FBgn0010747,FBgn0011272,FBgn0011284,FBgn0013325,FBgn0014026,FBgn0015288,FBgn0015521,FBgn0015756,FBgn0016726,FBgn0017545,FBgn0017579,FBgn0020910,FBgn0023170,FBgn0024733,FBgn0025700,FBg…	vesicle coat	GO:0030120	0.00296526	FBgn0008635,FBgn0024509,FBgn0025724,FBgn0025725,FBgn0028969,FBgn0033339,FBgn0038947,FBgn0040512,FBgn0262125	transferase activity, transferring nitrogenous groups	GO:0016769	0.00919344	FBgn0001124,FBgn0001125,FBgn0014031,FBgn0014427,FBgn0022774,FBgn0030482,FBgn0037955	Translation protein SH3-like domain	IPR008991	0.0295934	FBgn0017579,FBgn0032987,FBgn0036825,FBgn0039359,FBgn0040273,FBgn0261602	Glycine, serine and threonine metabolism	260	1.69863e-06	FBgn0000566,FBgn0014031,FBgn0014427,FBgn0023129,FBgn0029823,FBgn0031428,FBgn0031860,FBgn0032287,FBgn0032350,FBgn0034276,FBgn0036208,FBgn0036857,FBgn0037801,FBgn0038074,FBgn0039094	neuron development	GO:0048666	8.33184e-15	FBgn0000017,FBgn0000108,FBgn0000253,FBgn0000273,FBgn0000308,FBgn0000479,FBgn0000546,FBgn0000636,FBgn0001078,FBgn0001122,FBgn0001138,FBgn0001139,FBgn0001404,FBgn0002306,FBgn0002521,FBgn0003165,FBgn0003380,FBgn0003435,FBgn0003896,FBgn0003997,FBgn0004102,FBgn0004108,FBgn0004198,FBgn0004369,FBgn0004370,FBgn0004397,FBgn0004435,FBgn0004595,FBgn0004635,FBgn0004795,FBgn0004838,FBgn0004880,FBgn0005775,FBg…	cell projection	GO:0042995	0.000269061	FBgn0000017,FBgn0000253,FBgn0000273,FBgn0000308,FBgn0000490,FBgn0000546,FBgn0003165,FBgn0003218,FBgn0004242,FBgn0004244,FBgn0004369,FBgn0004370,FBgn0004435,FBgn0004575,FBgn0004580,FBgn0005614,FBgn0005775,FBgn0010113,FBgn0011288,FBgn0013342,FBgn0013343,FBgn0013759,FBgn0015609,FBgn0015774,FBgn0015777,FBgn0025726,FBgn0032840,FBgn0032901,FBgn0033438,FBgn0034789,FBgn0036260,FBgn0037447,FBgn0037614,FBg…	identical protein binding	GO:0042802	0.000524573	FBgn0000490,FBgn0000636,FBgn0002723,FBgn0004102,FBgn0004242,FBgn0005614,FBgn0010238,FBgn0010313,FBgn0011760,FBgn0015609,FBgn0022238,FBgn0032202,FBgn0034720,FBgn0036381,FBgn0259176,FBgn0259211,FBgn0263102,FBgn0264001,FBgn0264493,FBgn0265193,FBgn0265296					Basigin interactions	R-DME-210991	0.0394986	FBgn0015777,FBgn0032946,FBgn0033438,FBgn0261822,FBgn0264975
monocarboxylic acid metabolic process	GO:0032787	4.56957e-13	FBgn0001092,FBgn0001187,FBgn0001248,FBgn0002719,FBgn0003074,FBgn0010516,FBgn0011770,FBgn0012034,FBgn0012036,FBgn0014031,FBgn0020236,FBgn0021765,FBgn0023507,FBgn0027348,FBgn0027572,FBgn0027580,FBgn0027621,FBgn0028479,FBgn0028519,FBgn0029689,FBgn0029969,FBgn0030653,FBgn0030731,FBgn0030737,FBgn0032161,FBgn0032162,FBgn0032394,FBgn0033246,FBgn0033949,FBgn0034488,FBgn0034628,FBgn0034629,FBgn0037356,FBg…	membrane coat	GO:0030117	0.00314111	FBgn0000330,FBgn0008635,FBgn0024509,FBgn0025724,FBgn0025725,FBgn0028969,FBgn0033339,FBgn0038947,FBgn0040512,FBgn0262125	isomerase activity	GO:0016853	0.0116119	FBgn0001092,FBgn0001187,FBgn0002936,FBgn0003074,FBgn0003076,FBgn0004654,FBgn0010470,FBgn0011770,FBgn0013269,FBgn0014002,FBgn0023477,FBgn0027621,FBgn0028540,FBgn0031717,FBgn0033377,FBgn0034753,FBgn0035147,FBgn0035679,FBgn0036300,FBgn0037744,FBgn0038105,FBgn0043783,FBgn0050499,FBgn0086355,FBgn0250906	Ribosomal protein L2 domain 2	IPR014722	0.0295934	FBgn0017579,FBgn0031107,FBgn0036825,FBgn0039359,FBgn0040273,FBgn0261602	Purine ribonucleoside monophosphate biosynthesis	R-DME-73817	3.85766e-06	FBgn0000052,FBgn0000053,FBgn0000239,FBgn0003204,FBgn0020513,FBgn0027493,FBgn0038467,FBgn0039241,FBgn0041194	neuron projection morphogenesis	GO:0048812	8.81503e-15	FBgn0000017,FBgn0000108,FBgn0000253,FBgn0000308,FBgn0000479,FBgn0000546,FBgn0000636,FBgn0001078,FBgn0001122,FBgn0001138,FBgn0001139,FBgn0001404,FBgn0002306,FBgn0002521,FBgn0003165,FBgn0003380,FBgn0003435,FBgn0003896,FBgn0003997,FBgn0004102,FBgn0004108,FBgn0004198,FBgn0004369,FBgn0004370,FBgn0004397,FBgn0004435,FBgn0004595,FBgn0004635,FBgn0004795,FBgn0004838,FBgn0004880,FBgn0010113,FBgn0010300,FBg…	secretory vesicle	GO:0099503	0.000277219	FBgn0004242,FBgn0004575,FBgn0005586,FBgn0013342,FBgn0013343,FBgn0025726,FBgn0028400,FBgn0031424,FBgn0035756,FBgn0037153,FBgn0053547,FBgn0083228,FBgn0086677,FBgn0086913,FBgn0260964	neuropeptide hormone activity	GO:0005184	0.000548794	FBgn0023178,FBgn0027109,FBgn0032048,FBgn0032840,FBgn0035023,FBgn0035092,FBgn0037976,FBgn0042201,FBgn0045038					G-protein mediated events	R-DME-112040	0.0410555	FBgn0000253,FBgn0000273,FBgn0001122,FBgn0022382,FBgn0259680,FBgn0262738
protein complex disassembly	GO:0043241	5.47956e-13	FBgn0000100,FBgn0002590,FBgn0002622,FBgn0002626,FBgn0003274,FBgn0003279,FBgn0003517,FBgn0003941,FBgn0003942,FBgn0004403,FBgn0004867,FBgn0005533,FBgn0005593,FBgn0010198,FBgn0010265,FBgn0010391,FBgn0010408,FBgn0010411,FBgn0010747,FBgn0011272,FBgn0011284,FBgn0013325,FBgn0014026,FBgn0015288,FBgn0015521,FBgn0015756,FBgn0016726,FBgn0017545,FBgn0017579,FBgn0020910,FBgn0023170,FBgn0024733,FBgn0025700,FBg…	coated membrane	GO:0048475	0.00314111	FBgn0000330,FBgn0008635,FBgn0024509,FBgn0025724,FBgn0025725,FBgn0028969,FBgn0033339,FBgn0038947,FBgn0040512,FBgn0262125	oxidoreductase activity, acting on the CH-CH group of donors	GO:0016627	0.0144444	FBgn0000447,FBgn0010516,FBgn0027572,FBgn0031824,FBgn0034628,FBgn0034629,FBgn0035911,FBgn0036824,FBgn0038742,FBgn0040349,FBgn0086450,FBgn0283427	Aldehyde dehydrogenase domain	IPR015590	0.0295934	FBgn0012036,FBgn0023537,FBgn0032945,FBgn0036857,FBgn0051075,FBgn0053092	Cysteine and methionine metabolism	270	3.53808e-05	FBgn0000566,FBgn0001124,FBgn0001125,FBgn0001258,FBgn0005278,FBgn0014455,FBgn0019932,FBgn0030518,FBgn0032726,FBgn0034215,FBgn0034364,FBgn0037723,FBgn0052068	cell part morphogenesis	GO:0032990	8.91748e-15	FBgn0000017,FBgn0000108,FBgn0000253,FBgn0000308,FBgn0000479,FBgn0000546,FBgn0000636,FBgn0001078,FBgn0001122,FBgn0001138,FBgn0001139,FBgn0001404,FBgn0002306,FBgn0002521,FBgn0003165,FBgn0003380,FBgn0003435,FBgn0003896,FBgn0003997,FBgn0004102,FBgn0004108,FBgn0004198,FBgn0004369,FBgn0004370,FBgn0004397,FBgn0004435,FBgn0004595,FBgn0004635,FBgn0004795,FBgn0004838,FBgn0004880,FBgn0010113,FBgn0010300,FBg…	cell-cell junction	GO:0005911	0.000321291	FBgn0000017,FBgn0000636,FBgn0002921,FBgn0003285,FBgn0010238,FBgn0015609,FBgn0015777,FBgn0024189,FBgn0028369,FBgn0029082,FBgn0037240,FBgn0085387,FBgn0260799,FBgn0264975,FBgn0265991,FBgn0266409	G-protein coupled receptor activity	GO:0004930	0.000554609	FBgn0000253,FBgn0001122,FBgn0003218,FBgn0004168,FBgn0004435,FBgn0011582,FBgn0023178,FBgn0027109,FBgn0032048,FBgn0032840,FBgn0035023,FBgn0035092,FBgn0036260,FBgn0037976,FBgn0038063,FBgn0038880,FBgn0038980,FBgn0042201,FBgn0045038,FBgn0051140,FBgn0053639,FBgn0085413,FBgn0260446,FBgn0262738,FBgn0267252
macromolecular complex disassembly	GO:0032984	9.60508e-13	FBgn0000100,FBgn0002590,FBgn0002622,FBgn0002626,FBgn0003274,FBgn0003279,FBgn0003517,FBgn0003941,FBgn0003942,FBgn0004403,FBgn0004867,FBgn0005533,FBgn0005593,FBgn0010198,FBgn0010265,FBgn0010391,FBgn0010408,FBgn0010411,FBgn0010747,FBgn0011272,FBgn0011284,FBgn0013325,FBgn0014026,FBgn0015288,FBgn0015521,FBgn0015756,FBgn0016726,FBgn0017545,FBgn0017579,FBgn0020910,FBgn0023170,FBgn0024733,FBgn0025700,FBg…	preribosome	GO:0030684	0.00337982	FBgn0003062,FBgn0003517,FBgn0015393,FBgn0025366,FBgn0026196,FBgn0028744,FBgn0029714,FBgn0030177,FBgn0030878,FBgn0033454,FBgn0036460,FBgn0036686,FBgn0037073,FBgn0038146,FBgn0038964,FBgn0086451	heme binding	GO:0020037	0.0146611	FBgn0000406,FBgn0003965,FBgn0005670,FBgn0013773,FBgn0014469,FBgn0015039,FBgn0015040,FBgn0025454,FBgn0027657,FBgn0030339,FBgn0031126,FBgn0031432,FBgn0031689,FBgn0031693,FBgn0033065,FBgn0033775,FBgn0034756,FBgn0035344,FBgn0036806,FBgn0037817,FBgn0038194,FBgn0038465,FBgn0038681,FBgn0041337,FBgn0050489,FBgn0053503,FBgn0087002	Aldehyde dehydrogenase N-terminal domain	IPR016162	0.0295934	FBgn0012036,FBgn0023537,FBgn0032945,FBgn0036857,FBgn0051075,FBgn0053092	Pentose and glucuronate interconversions	40	0.000127319	FBgn0012036,FBgn0027073,FBgn0027552,FBgn0030737,FBgn0031418,FBgn0032684,FBgn0033101,FBgn0033949,FBgn0034605,FBgn0035978,FBgn0038083,FBgn0038463,FBgn0040091,FBgn0040256,FBgn0050499,FBgn0051075,FBgn0086254	animal organ morphogenesis	GO:0009887	1.01052e-14	FBgn0000017,FBgn0000179,FBgn0000253,FBgn0000273,FBgn0000276,FBgn0000289,FBgn0000308,FBgn0000489,FBgn0000490,FBgn0000546,FBgn0000633,FBgn0000659,FBgn0001078,FBgn0001122,FBgn0001138,FBgn0001235,FBgn0002921,FBgn0003209,FBgn0003285,FBgn0003463,FBgn0003896,FBgn0003997,FBgn0004102,FBgn0004169,FBgn0004198,FBgn0004395,FBgn0004435,FBgn0004569,FBgn0004595,FBgn0004618,FBgn0004635,FBgn0004795,FBgn0004858,FBg…	transport vesicle	GO:0030133	0.000876189	FBgn0004242,FBgn0004575,FBgn0005586,FBgn0013342,FBgn0013343,FBgn0025726,FBgn0028400,FBgn0031424,FBgn0035756,FBgn0053547,FBgn0083228,FBgn0086677,FBgn0086913,FBgn0260964,FBgn0270928	inorganic cation transmembrane transporter activity	GO:0022890	0.000626646	FBgn0000038,FBgn0000535,FBgn0002921,FBgn0003218,FBgn0003380,FBgn0003386,FBgn0005614,FBgn0013673,FBgn0013995,FBgn0015777,FBgn0027556,FBgn0028704,FBgn0028875,FBgn0029663,FBgn0029761,FBgn0029762,FBgn0030745,FBgn0032151,FBgn0035505,FBgn0039561,FBgn0040697,FBgn0053988,FBgn0085426,FBgn0086778,FBgn0259918,FBgn0260499,FBgn0260812,FBgn0261612,FBgn0262476,FBgn0262736,FBgn0263257,FBgn0263397,FBgn0266347
cellular component disassembly	GO:0022411	1.08003e-12	FBgn0000100,FBgn0000477,FBgn0001220,FBgn0002590,FBgn0002622,FBgn0002626,FBgn0003274,FBgn0003279,FBgn0003517,FBgn0003941,FBgn0003942,FBgn0004403,FBgn0004867,FBgn0005533,FBgn0005593,FBgn0010198,FBgn0010265,FBgn0010391,FBgn0010408,FBgn0010411,FBgn0010747,FBgn0011272,FBgn0011284,FBgn0013325,FBgn0014026,FBgn0015288,FBgn0015521,FBgn0015756,FBgn0016726,FBgn0017545,FBgn0017579,FBgn0020910,FBgn0023170,FBg…	coated vesicle	GO:0030135	0.00343452	FBgn0000330,FBgn0008635,FBgn0024509,FBgn0025724,FBgn0025725,FBgn0028484,FBgn0028969,FBgn0031990,FBgn0033339,FBgn0038947,FBgn0040512,FBgn0262125,FBgn0267330	oxidoreductase activity, acting on paired donors, with incorporation or reduction of molecular oxygen	GO:0016705	0.0146633	FBgn0001208,FBgn0005670,FBgn0013773,FBgn0014002,FBgn0014469,FBgn0015039,FBgn0015040,FBgn0025454,FBgn0030339,FBgn0031126,FBgn0031432,FBgn0031689,FBgn0031693,FBgn0033065,FBgn0033079,FBgn0033775,FBgn0034756,FBgn0034943,FBgn0035344,FBgn0036147,FBgn0036806,FBgn0037817,FBgn0037819,FBgn0038194,FBgn0038681,FBgn0038795,FBgn0041337,FBgn0050489,FBgn0053503,FBgn0086687,FBgn0283437	6-phosphogluconate dehydrogenase C-terminal domain-like	IPR008927	0.0408851	FBgn0004654,FBgn0015781,FBgn0028479,FBgn0030737,FBgn0033949,FBgn0034390	Pentose phosphate pathway	30	0.000149489	FBgn0003074,FBgn0003076,FBgn0004057,FBgn0004654,FBgn0023477,FBgn0030239,FBgn0032820,FBgn0033735,FBgn0034390,FBgn0036030,FBgn0037607,FBgn0050499	generation of neurons	GO:0048699	1.04634e-14	FBgn0000017,FBgn0000108,FBgn0000253,FBgn0000273,FBgn0000308,FBgn0000479,FBgn0000546,FBgn0000636,FBgn0001078,FBgn0001122,FBgn0001138,FBgn0001139,FBgn0001235,FBgn0001404,FBgn0002306,FBgn0002521,FBgn0003165,FBgn0003380,FBgn0003435,FBgn0003896,FBgn0003997,FBgn0004102,FBgn0004108,FBgn0004198,FBgn0004369,FBgn0004370,FBgn0004395,FBgn0004397,FBgn0004435,FBgn0004569,FBgn0004595,FBgn0004618,FBgn0004635,FBg…	postsynaptic membrane	GO:0045211	0.00098406	FBgn0000038,FBgn0025726,FBgn0028400,FBgn0028408,FBgn0028875,FBgn0032151,FBgn0086778,FBgn0266347	RNA polymerase II transcription factor activity, sequence-specific DNA binding	GO:0000981	0.000869647	FBgn0000439,FBgn0000448,FBgn0000546,FBgn0000568,FBgn0000659,FBgn0001078,FBgn0001138,FBgn0001235,FBgn0002723,FBgn0003896,FBgn0004102,FBgn0004595,FBgn0004618,FBgn0004795,FBgn0011481,FBgn0011766,FBgn0015664,FBgn0042696,FBgn0085432,FBgn0086680,FBgn0261703,FBgn0261793,FBgn0262477,FBgn0265193
organonitrogen compound metabolic process	GO:1901564	1.49032e-12	FBgn0000052,FBgn0000053,FBgn0000100,FBgn0000150,FBgn0000239,FBgn0000330,FBgn0000447,FBgn0000455,FBgn0000536,FBgn0000559,FBgn0000565,FBgn0000566,FBgn0001092,FBgn0001124,FBgn0001125,FBgn0001187,FBgn0001208,FBgn0002022,FBgn0002069,FBgn0002284,FBgn0002590,FBgn0002622,FBgn0002626,FBgn0002930,FBgn0002936,FBgn0003062,FBgn0003068,FBgn0003074,FBgn0003116,FBgn0003189,FBgn0003204,FBgn0003274,FBgn0003279,FBg…	COPI vesicle coat	GO:0030126	0.00345877	FBgn0008635,FBgn0025724,FBgn0025725,FBgn0028969,FBgn0040512	tetrapyrrole binding	GO:0046906	0.0156567	FBgn0000406,FBgn0003965,FBgn0005670,FBgn0013773,FBgn0014469,FBgn0015039,FBgn0015040,FBgn0025454,FBgn0027657,FBgn0030339,FBgn0031126,FBgn0031432,FBgn0031689,FBgn0031693,FBgn0033065,FBgn0033775,FBgn0034756,FBgn0035344,FBgn0036806,FBgn0037817,FBgn0038194,FBgn0038465,FBgn0038681,FBgn0041337,FBgn0050489,FBgn0053503,FBgn0087002	Thiolase-like	IPR016039	0.0408851	FBgn0010611,FBgn0015808,FBgn0029969,FBgn0037356,FBgn0040064,FBgn0283427	Glycolysis / Gluconeogenesis	10	0.000162659	FBgn0000055,FBgn0001092,FBgn0001187,FBgn0001258,FBgn0003067,FBgn0003074,FBgn0003076,FBgn0011768,FBgn0012034,FBgn0012036,FBgn0028540,FBgn0032820,FBgn0034356,FBgn0035679,FBgn0036857,FBgn0043783,FBgn0051075,FBgn0086355,FBgn0250906	cell morphogenesis involved in differentiation	GO:0000904	1.50783e-14	FBgn0000017,FBgn0000253,FBgn0000308,FBgn0000479,FBgn0000546,FBgn0000636,FBgn0001078,FBgn0001122,FBgn0001138,FBgn0001139,FBgn0001404,FBgn0002306,FBgn0002521,FBgn0003165,FBgn0003380,FBgn0003435,FBgn0003896,FBgn0003997,FBgn0004102,FBgn0004108,FBgn0004198,FBgn0004369,FBgn0004370,FBgn0004435,FBgn0004595,FBgn0004635,FBgn0004795,FBgn0004838,FBgn0004880,FBgn0010113,FBgn0010300,FBgn0010415,FBgn0010473,FBg…	cell-substrate adherens junction	GO:0005924	0.00146062	FBgn0000017,FBgn0004397,FBgn0010415,FBgn0031850,FBgn0032731,FBgn0063485,FBgn0085409,FBgn0259745,FBgn0265991	ammonium ion binding	GO:0070405	0.00103045	FBgn0000038,FBgn0004168,FBgn0011582,FBgn0028875,FBgn0032151,FBgn0086778,FBgn0266347,FBgn0270928
coenzyme metabolic process	GO:0006732	1.78671e-10	FBgn0001092,FBgn0001187,FBgn0003074,FBgn0003965,FBgn0004057,FBgn0004654,FBgn0005278,FBgn0010222,FBgn0011205,FBgn0012034,FBgn0014455,FBgn0020236,FBgn0020385,FBgn0021765,FBgn0022160,FBgn0023477,FBgn0027621,FBgn0029823,FBgn0030239,FBgn0030407,FBgn0030431,FBgn0032945,FBgn0033373,FBgn0034276,FBgn0035436,FBgn0035632,FBgn0037001,FBgn0037709,FBgn0038074,FBgn0039737,FBgn0039856,FBgn0050499,FBgn0051472,FBg…	COPI-coated vesicle	GO:0030137	0.00345877	FBgn0008635,FBgn0025724,FBgn0025725,FBgn0028969,FBgn0040512	flavin adenine dinucleotide binding	GO:0050660	0.0197741	FBgn0003308,FBgn0010516,FBgn0023507,FBgn0027572,FBgn0031824,FBgn0031860,FBgn0033079,FBgn0033543,FBgn0034628,FBgn0034629,FBgn0034943,FBgn0035911,FBgn0036824,FBgn0037896,FBgn0038742,FBgn0267408	Alkyl hydroperoxide reductase subunit C/ Thiol specific antioxidant	IPR000866	0.0424473	FBgn0033518,FBgn0033520,FBgn0033521,FBgn0040308,FBgn0040309	Glucose metabolism	R-DME-70326	0.000168568	FBgn0001124,FBgn0001125,FBgn0001187,FBgn0003067,FBgn0003074,FBgn0027580,FBgn0027610,FBgn0027621,FBgn0028646,FBgn0031717,FBgn0032820,FBgn0033377,FBgn0034356,FBgn0034611,FBgn0039674,FBgn0086355,FBgn0250906,FBgn0262782	response to stimulus	GO:0050896	3.5252e-14	FBgn0000017,FBgn0000038,FBgn0000108,FBgn0000253,FBgn0000259,FBgn0000273,FBgn0000276,FBgn0000277,FBgn0000308,FBgn0000448,FBgn0000479,FBgn0000490,FBgn0000535,FBgn0000546,FBgn0000568,FBgn0000636,FBgn0000659,FBgn0001078,FBgn0001122,FBgn0001138,FBgn0001139,FBgn0001235,FBgn0001404,FBgn0002306,FBgn0002723,FBgn0002868,FBgn0002921,FBgn0003165,FBgn0003209,FBgn0003218,FBgn0003380,FBgn0003423,FBgn0003435,FBg…	cell-substrate junction	GO:0030055	0.00146062	FBgn0000017,FBgn0004397,FBgn0010415,FBgn0031850,FBgn0032731,FBgn0063485,FBgn0085409,FBgn0259745,FBgn0265991	substrate-specific channel activity	GO:0022838	0.00105072	FBgn0000038,FBgn0000253,FBgn0000535,FBgn0003380,FBgn0003386,FBgn0004244,FBgn0005614,FBgn0015558,FBgn0015872,FBgn0027556,FBgn0028704,FBgn0028875,FBgn0029761,FBgn0030745,FBgn0032151,FBgn0035505,FBgn0040697,FBgn0053988,FBgn0085426,FBgn0086778,FBgn0259918,FBgn0260499,FBgn0260812,FBgn0261612,FBgn0263257,FBgn0263397,FBgn0264908,FBgn0264953,FBgn0266347
single-organism biosynthetic process	GO:0044711	1.84278e-10	FBgn0000052,FBgn0000053,FBgn0000150,FBgn0000239,FBgn0000330,FBgn0000447,FBgn0000536,FBgn0000566,FBgn0000592,FBgn0000996,FBgn0001124,FBgn0001125,FBgn0002936,FBgn0003067,FBgn0003074,FBgn0003076,FBgn0003189,FBgn0003204,FBgn0003965,FBgn0004797,FBgn0004852,FBgn0005655,FBgn0010217,FBgn0010516,FBgn0010611,FBgn0011205,FBgn0011703,FBgn0012034,FBgn0013307,FBgn0014031,FBgn0014427,FBgn0015622,FBgn0015781,FBg…	COPI-coated vesicle membrane	GO:0030663	0.00345877	FBgn0008635,FBgn0025724,FBgn0025725,FBgn0028969,FBgn0040512	carboxy-lyase activity	GO:0016831	0.0202362	FBgn0003067,FBgn0010591,FBgn0013307,FBgn0019932,FBgn0020513,FBgn0026576,FBgn0033428,FBgn0034356,FBgn0036975	Zinc-binding ribosomal protein	IPR011332	0.0424473	FBgn0003942,FBgn0030616,FBgn0031980,FBgn0039300,FBgn0261608	Gluconeogenesis	R-DME-70263	0.00022815	FBgn0001124,FBgn0001125,FBgn0003067,FBgn0003074,FBgn0027580,FBgn0027610,FBgn0028646,FBgn0032820,FBgn0034356,FBgn0034611,FBgn0039674,FBgn0086355,FBgn0250906,FBgn0262782	signaling	GO:0023052	2.23423e-13	FBgn0000017,FBgn0000038,FBgn0000253,FBgn0000273,FBgn0000448,FBgn0000479,FBgn0000490,FBgn0000535,FBgn0000546,FBgn0000568,FBgn0001078,FBgn0001122,FBgn0001139,FBgn0001235,FBgn0002723,FBgn0002921,FBgn0003165,FBgn0003209,FBgn0003218,FBgn0003285,FBgn0003380,FBgn0003463,FBgn0003896,FBgn0003997,FBgn0004168,FBgn0004198,FBgn0004242,FBgn0004244,FBgn0004369,FBgn0004370,FBgn0004435,FBgn0004569,FBgn0004575,FBg…	presynaptic active zone	GO:0048786	0.00164269	FBgn0005586,FBgn0013342,FBgn0025726,FBgn0041605,FBgn0053547,FBgn0259246,FBgn0261822,FBgn0262483	channel activity	GO:0015267	0.00108318	FBgn0000038,FBgn0000253,FBgn0000535,FBgn0003380,FBgn0003386,FBgn0004244,FBgn0005614,FBgn0015558,FBgn0015872,FBgn0027556,FBgn0028704,FBgn0028875,FBgn0029761,FBgn0030745,FBgn0032151,FBgn0035505,FBgn0040697,FBgn0053988,FBgn0085387,FBgn0085426,FBgn0086778,FBgn0259918,FBgn0260499,FBgn0260812,FBgn0261612,FBgn0263257,FBgn0263397,FBgn0264908,FBgn0264953,FBgn0266347
ribosome biogenesis	GO:0042254	3.57732e-10	FBgn0000100,FBgn0003062,FBgn0003517,FBgn0005533,FBgn0005593,FBgn0010411,FBgn0011824,FBgn0013325,FBgn0014026,FBgn0015075,FBgn0015393,FBgn0015521,FBgn0020909,FBgn0023542,FBgn0024733,FBgn0025366,FBgn0026196,FBgn0026372,FBgn0028744,FBgn0029148,FBgn0029714,FBgn0029785,FBgn0030177,FBgn0030720,FBgn0030878,FBgn0032050,FBgn0032404,FBgn0032518,FBgn0033454,FBgn0033741,FBgn0034743,FBgn0034968,FBgn0036213,FBg…	endoplasmic reticulum part	GO:0044432	0.00354519	FBgn0002022,FBgn0002936,FBgn0003656,FBgn0010391,FBgn0010638,FBgn0011336,FBgn0014868,FBgn0015622,FBgn0028327,FBgn0029906,FBgn0030306,FBgn0031260,FBgn0032015,FBgn0032398,FBgn0033187,FBgn0033339,FBgn0034176,FBgn0034277,FBgn0036153,FBgn0037612,FBgn0038524,FBgn0038535,FBgn0038947,FBgn0039172,FBgn0053303,FBgn0260234,FBgn0261020,FBgn0261283,FBgn0262125,FBgn0262801,FBgn0267972	racemase and epimerase activity, acting on carbohydrates and derivatives	GO:0016857	0.0204945	FBgn0004654,FBgn0023477,FBgn0035147,FBgn0035679,FBgn0043783,FBgn0050499	Peroxiredoxin, C-terminal	IPR019479	0.0424473	FBgn0033518,FBgn0033520,FBgn0033521,FBgn0040308,FBgn0040309	Metabolism of RNA	R-DME-8953854	0.000267072	FBgn0000100,FBgn0002284,FBgn0002590,FBgn0002622,FBgn0002626,FBgn0003274,FBgn0003279,FBgn0003517,FBgn0003941,FBgn0004403,FBgn0004867,FBgn0005533,FBgn0005593,FBgn0010198,FBgn0010265,FBgn0010408,FBgn0010411,FBgn0011272,FBgn0011284,FBgn0013325,FBgn0014026,FBgn0015288,FBgn0015393,FBgn0015521,FBgn0015756,FBgn0016697,FBgn0016726,FBgn0017545,FBgn0017579,FBgn0020909,FBgn0020910,FBgn0023170,FBgn0024733,FBg…	regulation of developmental process	GO:0050793	3.60352e-13	FBgn0000017,FBgn0000273,FBgn0000308,FBgn0000439,FBgn0000448,FBgn0000490,FBgn0000546,FBgn0000568,FBgn0000659,FBgn0001078,FBgn0001122,FBgn0001138,FBgn0001235,FBgn0002723,FBgn0002921,FBgn0003165,FBgn0003209,FBgn0003285,FBgn0003997,FBgn0004102,FBgn0004117,FBgn0004242,FBgn0004395,FBgn0004435,FBgn0004569,FBgn0004595,FBgn0004876,FBgn0005626,FBgn0010113,FBgn0010300,FBgn0010415,FBgn0010473,FBgn0011259,FBg…	adherens junction	GO:0005912	0.00181595	FBgn0000017,FBgn0000636,FBgn0003285,FBgn0004397,FBgn0010415,FBgn0028369,FBgn0029082,FBgn0031850,FBgn0032731,FBgn0063485,FBgn0085409,FBgn0259745,FBgn0260799,FBgn0265991	passive transmembrane transporter activity	GO:0022803	0.00108318	FBgn0000038,FBgn0000253,FBgn0000535,FBgn0003380,FBgn0003386,FBgn0004244,FBgn0005614,FBgn0015558,FBgn0015872,FBgn0027556,FBgn0028704,FBgn0028875,FBgn0029761,FBgn0030745,FBgn0032151,FBgn0035505,FBgn0040697,FBgn0053988,FBgn0085387,FBgn0085426,FBgn0086778,FBgn0259918,FBgn0260499,FBgn0260812,FBgn0261612,FBgn0263257,FBgn0263397,FBgn0264908,FBgn0264953,FBgn0266347
cofactor metabolic process	GO:0051186	5.19791e-10	FBgn0001092,FBgn0001187,FBgn0003074,FBgn0003965,FBgn0004057,FBgn0004654,FBgn0005278,FBgn0010222,FBgn0011205,FBgn0012034,FBgn0014455,FBgn0020236,FBgn0020385,FBgn0021765,FBgn0022160,FBgn0023477,FBgn0023536,FBgn0027621,FBgn0029823,FBgn0030239,FBgn0030407,FBgn0030431,FBgn0032945,FBgn0033373,FBgn0033428,FBgn0034276,FBgn0035436,FBgn0035632,FBgn0037001,FBgn0037709,FBgn0038074,FBgn0039737,FBgn0039856,FBg…	translation preinitiation complex	GO:0070993	0.0089001	FBgn0004926,FBgn0035423,FBgn0261609,FBgn0263740	ligase activity, forming carbon-sulfur bonds	GO:0016877	0.0219062	FBgn0000565,FBgn0010516,FBgn0012034,FBgn0027348,FBgn0027572,FBgn0028479,FBgn0028519,FBgn0029176,FBgn0029969,FBgn0030305,FBgn0030521,FBgn0030653,FBgn0030731,FBgn0032161,FBgn0032162,FBgn0034110,FBgn0034628,FBgn0034629,FBgn0035091,FBgn0035850,FBgn0037270,FBgn0037440,FBgn0037643,FBgn0040064,FBgn0040349,FBgn0040383,FBgn0044452,FBgn0260746,FBgn0263120	Peroxiredoxin, AhpC-type	IPR024706	0.0424473	FBgn0033518,FBgn0033520,FBgn0033521,FBgn0040308,FBgn0040309	One carbon pool by folate	670	0.000308284	FBgn0000053,FBgn0010222,FBgn0020385,FBgn0029823,FBgn0032287,FBgn0032945,FBgn0036157,FBgn0039241	plasma membrane bounded cell projection organization	GO:0120036	3.88539e-13	FBgn0000017,FBgn0000108,FBgn0000253,FBgn0000273,FBgn0000308,FBgn0000479,FBgn0000490,FBgn0000546,FBgn0000636,FBgn0001078,FBgn0001122,FBgn0001138,FBgn0001139,FBgn0001404,FBgn0002306,FBgn0002521,FBgn0003165,FBgn0003380,FBgn0003435,FBgn0003896,FBgn0003997,FBgn0004102,FBgn0004108,FBgn0004198,FBgn0004369,FBgn0004370,FBgn0004397,FBgn0004435,FBgn0004595,FBgn0004635,FBgn0004795,FBgn0004838,FBgn0004880,FBg…	anchoring junction	GO:0070161	0.00181595	FBgn0000017,FBgn0000636,FBgn0003285,FBgn0004397,FBgn0010415,FBgn0028369,FBgn0029082,FBgn0031850,FBgn0032731,FBgn0063485,FBgn0085409,FBgn0259745,FBgn0260799,FBgn0265991	acetylcholine receptor activity	GO:0015464	0.00134212	FBgn0000038,FBgn0028875,FBgn0032151,FBgn0086778,FBgn0260499,FBgn0266347
biosynthetic process	GO:0009058	2.9048e-09	FBgn0000052,FBgn0000053,FBgn0000100,FBgn0000150,FBgn0000239,FBgn0000330,FBgn0000447,FBgn0000504,FBgn0000536,FBgn0000559,FBgn0000566,FBgn0000592,FBgn0000964,FBgn0000996,FBgn0001124,FBgn0001125,FBgn0002069,FBgn0002590,FBgn0002622,FBgn0002626,FBgn0002905,FBgn0002936,FBgn0003067,FBgn0003068,FBgn0003074,FBgn0003076,FBgn0003116,FBgn0003189,FBgn0003204,FBgn0003274,FBgn0003279,FBgn0003507,FBgn0003517,FBg…	coated vesicle membrane	GO:0030662	0.00971591	FBgn0008635,FBgn0024509,FBgn0025724,FBgn0025725,FBgn0028969,FBgn0033339,FBgn0038947,FBgn0040512,FBgn0262125	acyl-CoA dehydrogenase activity	GO:0003995	0.0273632	FBgn0010516,FBgn0031824,FBgn0035911,FBgn0036824,FBgn0038742	Carbohydrate kinase, FGGY	IPR000577	0.0444434	FBgn0025592,FBgn0035266,FBgn0035484,FBgn0038463	Pentose phosphate pathway (hexose monophosphate shunt)	R-DME-71336	0.000351396	FBgn0004057,FBgn0004654,FBgn0023477,FBgn0030239,FBgn0033377,FBgn0033735,FBgn0036030,FBgn0037607,FBgn0050499	single organism signaling	GO:0044700	4.04363e-13	FBgn0000017,FBgn0000038,FBgn0000253,FBgn0000273,FBgn0000448,FBgn0000479,FBgn0000490,FBgn0000535,FBgn0000546,FBgn0000568,FBgn0001078,FBgn0001122,FBgn0001139,FBgn0001235,FBgn0002723,FBgn0002921,FBgn0003165,FBgn0003209,FBgn0003218,FBgn0003285,FBgn0003380,FBgn0003463,FBgn0003896,FBgn0003997,FBgn0004168,FBgn0004198,FBgn0004242,FBgn0004244,FBgn0004369,FBgn0004370,FBgn0004435,FBgn0004569,FBgn0004575,FBg…	synaptic membrane	GO:0097060	0.00198326	FBgn0000038,FBgn0025726,FBgn0028397,FBgn0028400,FBgn0028408,FBgn0028875,FBgn0032151,FBgn0086778,FBgn0259246,FBgn0266347	acetylcholine binding	GO:0042166	0.00134212	FBgn0000038,FBgn0028875,FBgn0032151,FBgn0086778,FBgn0266347,FBgn0270928
organic substance metabolic process	GO:0071704	3.69809e-09	FBgn0000052,FBgn0000053,FBgn0000055,FBgn0000100,FBgn0000150,FBgn0000239,FBgn0000330,FBgn0000406,FBgn0000447,FBgn0000455,FBgn0000477,FBgn0000504,FBgn0000536,FBgn0000559,FBgn0000565,FBgn0000566,FBgn0000615,FBgn0000964,FBgn0000996,FBgn0001092,FBgn0001124,FBgn0001125,FBgn0001187,FBgn0001208,FBgn0001248,FBgn0001258,FBgn0002022,FBgn0002069,FBgn0002284,FBgn0002590,FBgn0002622,FBgn0002626,FBgn0002719,FBg…	signal recognition particle, endoplasmic reticulum targeting	GO:0005786	0.0146031	FBgn0010747,FBgn0011016,FBgn0021795,FBgn0035947,FBgn0038810	hydroxymethyl-, formyl- and related transferase activity	GO:0016742	0.0291057	FBgn0000053,FBgn0029823,FBgn0032945,FBgn0039241	KOW	IPR005824	0.0444434	FBgn0011284,FBgn0036825,FBgn0039359,FBgn0040273	Aminoacyl-tRNA biosynthesis	970	0.000353169	FBgn0002069,FBgn0005674,FBgn0027079,FBgn0027080,FBgn0027081,FBgn0027084,FBgn0027086,FBgn0027087,FBgn0027088,FBgn0027090,FBgn0027091,FBgn0027093,FBgn0027094,FBgn0031497,FBgn0034401,FBgn0086443	cell communication	GO:0007154	4.95483e-13	FBgn0000017,FBgn0000038,FBgn0000253,FBgn0000259,FBgn0000273,FBgn0000448,FBgn0000479,FBgn0000490,FBgn0000535,FBgn0000546,FBgn0000568,FBgn0001078,FBgn0001122,FBgn0001139,FBgn0001235,FBgn0002723,FBgn0002921,FBgn0003165,FBgn0003209,FBgn0003218,FBgn0003285,FBgn0003380,FBgn0003463,FBgn0003896,FBgn0003997,FBgn0004168,FBgn0004198,FBgn0004242,FBgn0004244,FBgn0004369,FBgn0004370,FBgn0004435,FBgn0004569,FBg…	acetylcholine-gated channel complex	GO:0005892	0.00202832	FBgn0000038,FBgn0028875,FBgn0032151,FBgn0086778,FBgn0266347	metal ion transmembrane transporter activity	GO:0046873	0.00136883	FBgn0000535,FBgn0002921,FBgn0003218,FBgn0003380,FBgn0003386,FBgn0005614,FBgn0013995,FBgn0015777,FBgn0027556,FBgn0028704,FBgn0029663,FBgn0029761,FBgn0029762,FBgn0030745,FBgn0035505,FBgn0039561,FBgn0040697,FBgn0053988,FBgn0085426,FBgn0259918,FBgn0260499,FBgn0260812,FBgn0261612,FBgn0262476,FBgn0263257,FBgn0263397
aspartate family amino acid metabolic process	GO:0009066	8.55818e-09	FBgn0000566,FBgn0001124,FBgn0001125,FBgn0014455,FBgn0029689,FBgn0030518,FBgn0030653,FBgn0031824,FBgn0032727,FBgn0034276,FBgn0036157,FBgn0036208,FBgn0038074,FBgn0039094,FBgn0052068,FBgn0270926	signal recognition particle	GO:0048500	0.0146031	FBgn0010747,FBgn0011016,FBgn0021795,FBgn0035947,FBgn0038810,FBgn0267972	carbohydrate phosphatase activity	GO:0019203	0.0291057	FBgn0027560,FBgn0027621,FBgn0031907,FBgn0032820	ClpP/crotonase-like domain	IPR029045	0.0468879	FBgn0028479,FBgn0032161,FBgn0032162,FBgn0032229,FBgn0033246,FBgn0038326,FBgn0042083	Metabolism of vitamins and cofactors	R-DME-196854	0.000635908	FBgn0001248,FBgn0003308,FBgn0010222,FBgn0011205,FBgn0020385,FBgn0027580,FBgn0029823,FBgn0030407,FBgn0030431,FBgn0031913,FBgn0032783,FBgn0032945,FBgn0033246,FBgn0033373,FBgn0034479,FBgn0035436,FBgn0035632,FBgn0036157,FBgn0036211,FBgn0040512,FBgn0042083,FBgn0050344,FBgn0051472,FBgn0085453,FBgn0086254,FBgn0260388,FBgn0267408,FBgn0283427	cell projection organization	GO:0030030	6.62448e-13	FBgn0000017,FBgn0000108,FBgn0000253,FBgn0000273,FBgn0000308,FBgn0000479,FBgn0000490,FBgn0000546,FBgn0000636,FBgn0001078,FBgn0001122,FBgn0001138,FBgn0001139,FBgn0001404,FBgn0002306,FBgn0002521,FBgn0003165,FBgn0003380,FBgn0003435,FBgn0003896,FBgn0003997,FBgn0004102,FBgn0004108,FBgn0004198,FBgn0004369,FBgn0004370,FBgn0004397,FBgn0004435,FBgn0004595,FBgn0004635,FBgn0004795,FBgn0004838,FBgn0004880,FBg…	cytoskeleton of presynaptic active zone	GO:0048788	0.0026441	FBgn0053547,FBgn0259246,FBgn0261822,FBgn0262483	ion channel activity	GO:0005216	0.00160127	FBgn0000038,FBgn0000253,FBgn0000535,FBgn0003380,FBgn0003386,FBgn0004244,FBgn0005614,FBgn0015558,FBgn0027556,FBgn0028704,FBgn0028875,FBgn0029761,FBgn0030745,FBgn0032151,FBgn0035505,FBgn0040697,FBgn0053988,FBgn0085426,FBgn0086778,FBgn0259918,FBgn0260499,FBgn0260812,FBgn0261612,FBgn0263257,FBgn0263397,FBgn0264908,FBgn0264953,FBgn0266347
cellular metabolic process	GO:0044237	1.14781e-08	FBgn0000052,FBgn0000053,FBgn0000055,FBgn0000100,FBgn0000150,FBgn0000239,FBgn0000330,FBgn0000447,FBgn0000477,FBgn0000504,FBgn0000536,FBgn0000559,FBgn0000565,FBgn0000566,FBgn0000592,FBgn0000615,FBgn0000964,FBgn0000996,FBgn0001092,FBgn0001124,FBgn0001125,FBgn0001187,FBgn0001208,FBgn0001220,FBgn0001248,FBgn0001258,FBgn0002022,FBgn0002069,FBgn0002284,FBgn0002590,FBgn0002622,FBgn0002626,FBgn0002719,FBg…	nucleolar part	GO:0044452	0.0147859	FBgn0003062,FBgn0003517,FBgn0011824,FBgn0015393,FBgn0019938,FBgn0026196,FBgn0028744,FBgn0029148,FBgn0029714,FBgn0033454,FBgn0036686,FBgn0038146,FBgn0038473,FBgn0038964,FBgn0086451	cyclohydrolase activity	GO:0019238	0.0291057	FBgn0010222,FBgn0020385,FBgn0025615,FBgn0039241					Amino acid synthesis and interconversion (transamination)	R-DME-70614	0.000637879	FBgn0001124,FBgn0001125,FBgn0014427,FBgn0015781,FBgn0022774,FBgn0023129,FBgn0029689,FBgn0030478,FBgn0032350,FBgn0037955	regulation of biological quality	GO:0065008	8.43241e-13	FBgn0000017,FBgn0000038,FBgn0000044,FBgn0000253,FBgn0000308,FBgn0000490,FBgn0000535,FBgn0000546,FBgn0000568,FBgn0001078,FBgn0001122,FBgn0001186,FBgn0001323,FBgn0001404,FBgn0002868,FBgn0002921,FBgn0003165,FBgn0003209,FBgn0003380,FBgn0003475,FBgn0003896,FBgn0004169,FBgn0004242,FBgn0004397,FBgn0004435,FBgn0004575,FBgn0004580,FBgn0004618,FBgn0004635,FBgn0004795,FBgn0005586,FBgn0005614,FBgn0010238,FBg…	presynaptic active zone cytoplasmic component	GO:0098831	0.0026441	FBgn0053547,FBgn0259246,FBgn0261822,FBgn0262483	transmembrane signaling receptor activity	GO:0004888	0.00164809	FBgn0000038,FBgn0000253,FBgn0001122,FBgn0003218,FBgn0004168,FBgn0004244,FBgn0004369,FBgn0004370,FBgn0004435,FBgn0011582,FBgn0015399,FBgn0023178,FBgn0027109,FBgn0028875,FBgn0029814,FBgn0032048,FBgn0032151,FBgn0032840,FBgn0035023,FBgn0035092,FBgn0036260,FBgn0037976,FBgn0038063,FBgn0038880,FBgn0038980,FBgn0040505,FBgn0042201,FBgn0045038,FBgn0051140,FBgn0053639,FBgn0085413,FBgn0086677,FBgn0086778,FBg…
cellular amino acid biosynthetic process	GO:0008652	1.74601e-08	FBgn0000566,FBgn0001124,FBgn0001125,FBgn0014031,FBgn0014427,FBgn0015781,FBgn0020385,FBgn0023129,FBgn0026565,FBgn0029823,FBgn0030482,FBgn0030518,FBgn0032076,FBgn0032224,FBgn0032727,FBgn0038074,FBgn0039094,FBgn0052068,FBgn0270926	COPII vesicle coat	GO:0030127	0.0218347	FBgn0024509,FBgn0033339,FBgn0038947,FBgn0262125	snoRNA binding	GO:0030515	0.0306166	FBgn0011824,FBgn0026196,FBgn0029148,FBgn0033454,FBgn0036686,FBgn0037073,FBgn0038964,FBgn0086451					Alanine, aspartate and glutamate metabolism	250	0.00070845	FBgn0001124,FBgn0001125,FBgn0003189,FBgn0014031,FBgn0026565,FBgn0027493,FBgn0030478,FBgn0032076,FBgn0033543,FBgn0037687,FBgn0038467,FBgn0041194,FBgn0270926	taxis	GO:0042330	1.35625e-12	FBgn0000017,FBgn0000253,FBgn0000308,FBgn0000490,FBgn0000636,FBgn0001138,FBgn0001404,FBgn0002306,FBgn0003423,FBgn0003435,FBgn0003896,FBgn0004108,FBgn0004198,FBgn0004369,FBgn0004370,FBgn0004435,FBgn0004595,FBgn0004795,FBgn0004838,FBgn0005626,FBgn0005775,FBgn0010300,FBgn0010415,FBgn0010473,FBgn0011259,FBgn0011582,FBgn0011817,FBgn0014135,FBgn0015609,FBgn0015774,FBgn0016977,FBgn0022382,FBgn0023178,FBg…	presynaptic cytoskeleton	GO:0099569	0.0026441	FBgn0053547,FBgn0259246,FBgn0261822,FBgn0262483	potassium ion transmembrane transporter activity	GO:0015079	0.00182693	FBgn0000535,FBgn0002921,FBgn0003380,FBgn0003386,FBgn0015777,FBgn0027556,FBgn0028704,FBgn0029761,FBgn0030745,FBgn0260499,FBgn0261612,FBgn0263257,FBgn0263397
alpha-amino acid biosynthetic process	GO:1901607	2.92642e-08	FBgn0000566,FBgn0001124,FBgn0001125,FBgn0014031,FBgn0014427,FBgn0015781,FBgn0023129,FBgn0026565,FBgn0029823,FBgn0030482,FBgn0030518,FBgn0032076,FBgn0032224,FBgn0032727,FBgn0038074,FBgn0039094,FBgn0052068,FBgn0270926	box C/D snoRNP complex	GO:0031428	0.0218347	FBgn0003062,FBgn0015393,FBgn0026196,FBgn0038964	intramolecular oxidoreductase activity	GO:0016860	0.0307254	FBgn0003074,FBgn0004654,FBgn0011770,FBgn0014002,FBgn0023477,FBgn0031717,FBgn0037744,FBgn0038105,FBgn0050499,FBgn0086355					Propanoate metabolism	640	0.000851531	FBgn0001258,FBgn0012034,FBgn0012036,FBgn0023537,FBgn0028479,FBgn0029969,FBgn0033246,FBgn0036857,FBgn0037643,FBgn0038326,FBgn0051075	response to external stimulus	GO:0009605	2.07047e-12	FBgn0000017,FBgn0000253,FBgn0000259,FBgn0000276,FBgn0000277,FBgn0000308,FBgn0000490,FBgn0000568,FBgn0000636,FBgn0001122,FBgn0001138,FBgn0001404,FBgn0002306,FBgn0002921,FBgn0003218,FBgn0003380,FBgn0003423,FBgn0003435,FBgn0003896,FBgn0003997,FBgn0004108,FBgn0004198,FBgn0004240,FBgn0004244,FBgn0004369,FBgn0004370,FBgn0004435,FBgn0004516,FBgn0004595,FBgn0004618,FBgn0004795,FBgn0004838,FBgn0005614,FBg…	transmembrane transporter complex	GO:1902495	0.00478831	FBgn0000038,FBgn0000535,FBgn0002921,FBgn0003380,FBgn0003386,FBgn0005614,FBgn0015777,FBgn0028875,FBgn0032151,FBgn0032946,FBgn0086778,FBgn0260499,FBgn0261612,FBgn0263257,FBgn0266347	translation repressor activity, nucleic acid binding	GO:0000900	0.00244248	FBgn0003165,FBgn0011224,FBgn0011666,FBgn0260400,FBgn0264270
organic acid biosynthetic process	GO:0016053	3.49628e-08	FBgn0000566,FBgn0001124,FBgn0001125,FBgn0014031,FBgn0014427,FBgn0015781,FBgn0020236,FBgn0020385,FBgn0023129,FBgn0026565,FBgn0029823,FBgn0029969,FBgn0030407,FBgn0030482,FBgn0030518,FBgn0032076,FBgn0032224,FBgn0032394,FBgn0032727,FBgn0033246,FBgn0037356,FBgn0038074,FBgn0039094,FBgn0052068,FBgn0085453,FBgn0086687,FBgn0261283,FBgn0270926	intracellular organelle	GO:0043229	0.0240789	FBgn0000100,FBgn0000150,FBgn0000239,FBgn0000330,FBgn0000406,FBgn0000447,FBgn0000504,FBgn0000615,FBgn0000964,FBgn0000996,FBgn0001124,FBgn0001125,FBgn0001220,FBgn0001223,FBgn0001248,FBgn0002022,FBgn0002031,FBgn0002590,FBgn0002622,FBgn0002626,FBgn0002719,FBgn0002780,FBgn0002936,FBgn0003062,FBgn0003067,FBgn0003068,FBgn0003116,FBgn0003274,FBgn0003279,FBgn0003507,FBgn0003517,FBgn0003656,FBgn0003890,FBg…	intramolecular transferase activity, phosphotransferases	GO:0016868	0.0307254	FBgn0001092,FBgn0001187,FBgn0003074,FBgn0003076,FBgn0027621,FBgn0033377,FBgn0036300,FBgn0037744,FBgn0086355,FBgn0250906					Protein export	3060	0.000851531	FBgn0010391,FBgn0010638,FBgn0010747,FBgn0030306,FBgn0031049,FBgn0035771,FBgn0035947,FBgn0038810,FBgn0039172,FBgn0086357,FBgn0262801	axon development	GO:0061564	2.81639e-12	FBgn0000017,FBgn0000253,FBgn0000273,FBgn0000308,FBgn0000479,FBgn0000636,FBgn0001138,FBgn0001404,FBgn0002306,FBgn0003380,FBgn0003435,FBgn0003896,FBgn0004108,FBgn0004369,FBgn0004370,FBgn0004435,FBgn0004595,FBgn0004635,FBgn0004795,FBgn0004838,FBgn0005775,FBgn0010113,FBgn0010300,FBgn0010415,FBgn0010473,FBgn0011259,FBgn0014010,FBgn0014163,FBgn0015609,FBgn0015774,FBgn0016977,FBgn0022382,FBgn0026375,FBg…	rhabdomere	GO:0016028	0.00580495	FBgn0000253,FBgn0003218,FBgn0004435,FBgn0005614,FBgn0034789,FBgn0259918,FBgn0262738,FBgn0267252	translation regulator activity, nucleic acid binding	GO:0090079	0.00244248	FBgn0003165,FBgn0011224,FBgn0011666,FBgn0260400,FBgn0264270
carboxylic acid biosynthetic process	GO:0046394	3.49628e-08	FBgn0000566,FBgn0001124,FBgn0001125,FBgn0014031,FBgn0014427,FBgn0015781,FBgn0020236,FBgn0020385,FBgn0023129,FBgn0026565,FBgn0029823,FBgn0029969,FBgn0030407,FBgn0030482,FBgn0030518,FBgn0032076,FBgn0032224,FBgn0032394,FBgn0032727,FBgn0033246,FBgn0037356,FBgn0038074,FBgn0039094,FBgn0052068,FBgn0085453,FBgn0086687,FBgn0261283,FBgn0270926	organelle	GO:0043226	0.0374534	FBgn0000100,FBgn0000150,FBgn0000239,FBgn0000330,FBgn0000406,FBgn0000447,FBgn0000504,FBgn0000615,FBgn0000964,FBgn0000996,FBgn0001124,FBgn0001125,FBgn0001220,FBgn0001223,FBgn0001248,FBgn0002022,FBgn0002031,FBgn0002590,FBgn0002622,FBgn0002626,FBgn0002719,FBgn0002780,FBgn0002936,FBgn0003062,FBgn0003067,FBgn0003068,FBgn0003116,FBgn0003274,FBgn0003279,FBgn0003507,FBgn0003517,FBgn0003656,FBgn0003890,FBg…	anion binding	GO:0043168	0.0311616	FBgn0000053,FBgn0000150,FBgn0000239,FBgn0000559,FBgn0000566,FBgn0001124,FBgn0001125,FBgn0001187,FBgn0001220,FBgn0002069,FBgn0002905,FBgn0003067,FBgn0003189,FBgn0003308,FBgn0003676,FBgn0003731,FBgn0003890,FBgn0005278,FBgn0005674,FBgn0010217,FBgn0010222,FBgn0010241,FBgn0010246,FBgn0010339,FBgn0010387,FBgn0010391,FBgn0010516,FBgn0010591,FBgn0010638,FBgn0010747,FBgn0011205,FBgn0011703,FBgn0012034,FBg…					Fatty acid metabolism	R-DME-8978868	0.000911076	FBgn0000055,FBgn0000056,FBgn0010226,FBgn0013773,FBgn0015039,FBgn0015040,FBgn0015808,FBgn0020236,FBgn0025454,FBgn0027348,FBgn0027572,FBgn0028479,FBgn0028519,FBgn0030731,FBgn0031126,FBgn0031703,FBgn0032161,FBgn0032162,FBgn0032358,FBgn0032394,FBgn0032513,FBgn0033065,FBgn0033246,FBgn0033775,FBgn0034488,FBgn0034628,FBgn0034629,FBgn0037440,FBgn0038742,FBgn0039856,FBgn0040064,FBgn0061356,FBgn0086687,FBg…	system process	GO:0003008	5.98579e-12	FBgn0000017,FBgn0000108,FBgn0000253,FBgn0000273,FBgn0000479,FBgn0000535,FBgn0000546,FBgn0000636,FBgn0001122,FBgn0002773,FBgn0002921,FBgn0003165,FBgn0003218,FBgn0003380,FBgn0004117,FBgn0004168,FBgn0004169,FBgn0004198,FBgn0004244,FBgn0004370,FBgn0004435,FBgn0004516,FBgn0004575,FBgn0004595,FBgn0004618,FBgn0004635,FBgn0005614,FBgn0005666,FBgn0010415,FBgn0011259,FBgn0011582,FBgn0013334,FBgn0013576,FBg…	Z disc	GO:0030018	0.00703916	FBgn0005666,FBgn0034072,FBgn0039897,FBgn0052311,FBgn0063485,FBgn0261836,FBgn0265487,FBgn0265991	transmembrane receptor activity	GO:0099600	0.00273236	FBgn0000038,FBgn0000253,FBgn0001122,FBgn0003218,FBgn0004168,FBgn0004244,FBgn0004369,FBgn0004370,FBgn0004435,FBgn0011582,FBgn0015399,FBgn0023178,FBgn0027109,FBgn0028875,FBgn0029814,FBgn0032048,FBgn0032151,FBgn0032840,FBgn0035023,FBgn0035092,FBgn0036260,FBgn0037976,FBgn0038063,FBgn0038880,FBgn0038980,FBgn0040505,FBgn0042201,FBgn0045038,FBgn0051140,FBgn0053639,FBgn0085413,FBgn0086677,FBgn0086778,FBg…
carbohydrate metabolic process	GO:0005975	4.92408e-08	FBgn0001092,FBgn0001187,FBgn0001248,FBgn0001258,FBgn0003067,FBgn0003074,FBgn0003076,FBgn0003507,FBgn0003731,FBgn0003748,FBgn0004057,FBgn0004654,FBgn0010217,FBgn0010222,FBgn0013763,FBgn0019957,FBgn0020236,FBgn0020251,FBgn0020306,FBgn0020415,FBgn0020416,FBgn0021872,FBgn0022160,FBgn0023477,FBgn0025592,FBgn0027550,FBgn0027560,FBgn0027580,FBgn0027611,FBgn0027621,FBgn0028540,FBgn0030239,FBgn0031717,FBg…	t-UTP complex	GO:0034455	0.038081	FBgn0003062,FBgn0003517,FBgn0015393,FBgn0026196,FBgn0029714,FBgn0033454,FBgn0036686,FBgn0038146,FBgn0038964,FBgn0086451	O-acyltransferase activity	GO:0008374	0.0391766	FBgn0004797,FBgn0027579,FBgn0037440,FBgn0037612,FBgn0042175,FBgn0051683,FBgn0053120					Glyoxylate metabolism and glycine degradation	R-DME-389661	0.00100726	FBgn0001125,FBgn0014031,FBgn0027945,FBgn0030612,FBgn0032889,FBgn0033543,FBgn0037709,FBgn0037801,FBgn0038074,FBgn0039827,FBgn0051673,FBgn0053092,FBgn0061356	axonogenesis	GO:0007409	9.87205e-12	FBgn0000017,FBgn0000253,FBgn0000308,FBgn0000479,FBgn0000636,FBgn0001138,FBgn0001404,FBgn0002306,FBgn0003380,FBgn0003435,FBgn0003896,FBgn0004108,FBgn0004369,FBgn0004370,FBgn0004435,FBgn0004595,FBgn0004635,FBgn0004795,FBgn0004838,FBgn0010113,FBgn0010300,FBgn0010415,FBgn0010473,FBgn0011259,FBgn0014010,FBgn0014163,FBgn0015609,FBgn0015774,FBgn0016977,FBgn0022382,FBgn0026375,FBgn0033438,FBgn0034072,FBg…	I band	GO:0031674	0.00703916	FBgn0005666,FBgn0034072,FBgn0039897,FBgn0052311,FBgn0063485,FBgn0261836,FBgn0265487,FBgn0265991	voltage-gated potassium channel activity	GO:0005249	0.0028306	FBgn0000535,FBgn0003380,FBgn0003386,FBgn0260499,FBgn0261612,FBgn0263257,FBgn0263397
cellular biosynthetic process	GO:0044249	5.06024e-08	FBgn0000052,FBgn0000053,FBgn0000100,FBgn0000150,FBgn0000239,FBgn0000330,FBgn0000447,FBgn0000504,FBgn0000536,FBgn0000559,FBgn0000566,FBgn0000592,FBgn0000964,FBgn0000996,FBgn0001124,FBgn0001125,FBgn0002069,FBgn0002590,FBgn0002622,FBgn0002626,FBgn0002905,FBgn0002936,FBgn0003068,FBgn0003076,FBgn0003116,FBgn0003189,FBgn0003204,FBgn0003274,FBgn0003279,FBgn0003507,FBgn0003517,FBgn0003867,FBgn0003941,FBg…					racemase and epimerase activity	GO:0016854	0.0450309	FBgn0004654,FBgn0023477,FBgn0035147,FBgn0035679,FBgn0043783,FBgn0050499					Metabolism of water-soluble vitamins and cofactors	R-DME-196849	0.00133877	FBgn0003308,FBgn0010222,FBgn0011205,FBgn0020385,FBgn0027580,FBgn0029823,FBgn0030407,FBgn0030431,FBgn0032945,FBgn0033246,FBgn0033373,FBgn0034479,FBgn0035436,FBgn0035632,FBgn0036157,FBgn0036211,FBgn0040512,FBgn0042083,FBgn0050344,FBgn0051472,FBgn0085453,FBgn0260388,FBgn0267408,FBgn0283427	locomotion	GO:0040011	2.75657e-11	FBgn0000017,FBgn0000253,FBgn0000308,FBgn0000490,FBgn0000546,FBgn0000636,FBgn0001138,FBgn0001186,FBgn0001323,FBgn0001404,FBgn0002306,FBgn0002773,FBgn0003165,FBgn0003423,FBgn0003435,FBgn0003896,FBgn0004108,FBgn0004198,FBgn0004369,FBgn0004370,FBgn0004435,FBgn0004595,FBgn0004795,FBgn0004838,FBgn0005626,FBgn0005775,FBgn0010300,FBgn0010415,FBgn0010473,FBgn0011259,FBgn0011582,FBgn0011817,FBgn0013759,FBg…	ion channel complex	GO:0034702	0.00737851	FBgn0000038,FBgn0000535,FBgn0003380,FBgn0003386,FBgn0005614,FBgn0028875,FBgn0032151,FBgn0086778,FBgn0260499,FBgn0261612,FBgn0263257,FBgn0266347	protein homodimerization activity	GO:0042803	0.00293006	FBgn0000490,FBgn0000636,FBgn0002723,FBgn0004102,FBgn0004242,FBgn0010238,FBgn0010313,FBgn0011760,FBgn0015609,FBgn0022238,FBgn0032202,FBgn0034720,FBgn0259176,FBgn0259211,FBgn0263102,FBgn0264001,FBgn0264493,FBgn0265193
fatty acid metabolic process	GO:0006631	5.63055e-08	FBgn0001248,FBgn0010516,FBgn0020236,FBgn0021765,FBgn0027348,FBgn0027572,FBgn0028479,FBgn0028519,FBgn0029969,FBgn0030731,FBgn0030737,FBgn0032161,FBgn0032162,FBgn0032394,FBgn0033246,FBgn0033949,FBgn0034488,FBgn0034628,FBgn0034629,FBgn0037356,FBgn0037440,FBgn0037819,FBgn0038984,FBgn0040064,FBgn0040349,FBgn0086687,FBgn0261283,FBgn0263120,FBgn0263593					peroxiredoxin activity	GO:0051920	0.0455527	FBgn0033518,FBgn0033520,FBgn0033521,FBgn0040308,FBgn0040309					Protein processing in endoplasmic reticulum	4141	0.00137212	FBgn0010638,FBgn0011016,FBgn0011336,FBgn0014002,FBgn0014868,FBgn0015622,FBgn0021795,FBgn0021872,FBgn0024314,FBgn0024509,FBgn0025700,FBgn0028327,FBgn0030990,FBgn0031049,FBgn0031256,FBgn0032015,FBgn0032398,FBgn0032480,FBgn0033339,FBgn0034277,FBgn0035771,FBgn0035909,FBgn0038947,FBgn0039562,FBgn0040340,FBgn0053303,FBgn0086357,FBgn0261014,FBgn0261609,FBgn0261984,FBgn0262125,FBgn0267972	negative regulation of cellular process	GO:0048523	3.23791e-11	FBgn0000017,FBgn0000108,FBgn0000179,FBgn0000253,FBgn0000273,FBgn0000308,FBgn0000439,FBgn0000448,FBgn0000490,FBgn0000546,FBgn0000568,FBgn0000659,FBgn0000810,FBgn0001122,FBgn0001139,FBgn0001323,FBgn0002521,FBgn0002723,FBgn0003165,FBgn0003209,FBgn0003463,FBgn0004102,FBgn0004168,FBgn0004198,FBgn0004244,FBgn0004435,FBgn0004569,FBgn0004595,FBgn0004795,FBgn0004838,FBgn0004865,FBgn0004876,FBgn0004880,FBg…	actin cytoskeleton	GO:0015629	0.00756927	FBgn0000044,FBgn0000046,FBgn0000253,FBgn0000308,FBgn0002773,FBgn0004117,FBgn0004169,FBgn0004397,FBgn0005666,FBgn0024238,FBgn0039897,FBgn0261836,FBgn0263391,FBgn0265935,FBgn0265991	poly(U) RNA binding	GO:0008266	0.00326265	FBgn0086675,FBgn0260400,FBgn0260943,FBgn0264270
organic substance biosynthetic process	GO:1901576	5.98633e-08	FBgn0000052,FBgn0000053,FBgn0000100,FBgn0000150,FBgn0000239,FBgn0000330,FBgn0000447,FBgn0000504,FBgn0000536,FBgn0000559,FBgn0000566,FBgn0000964,FBgn0000996,FBgn0001124,FBgn0001125,FBgn0002069,FBgn0002590,FBgn0002622,FBgn0002626,FBgn0002905,FBgn0002936,FBgn0003067,FBgn0003068,FBgn0003074,FBgn0003076,FBgn0003116,FBgn0003189,FBgn0003204,FBgn0003274,FBgn0003279,FBgn0003507,FBgn0003517,FBgn0003867,FBg…					pyridoxal phosphate binding	GO:0030170	0.0459086	FBgn0000566,FBgn0001124,FBgn0001125,FBgn0010591,FBgn0022774,FBgn0029823,FBgn0030478,FBgn0036208,FBgn0036975,FBgn0037955					Fructose and mannose metabolism	51	0.00140887	FBgn0001187,FBgn0022359,FBgn0024289,FBgn0027552,FBgn0027621,FBgn0032820,FBgn0033101,FBgn0033377,FBgn0036300,FBgn0037279,FBgn0037744,FBgn0086254,FBgn0086355	chemotaxis	GO:0006935	3.85816e-11	FBgn0000017,FBgn0000253,FBgn0000308,FBgn0000490,FBgn0000636,FBgn0001138,FBgn0001404,FBgn0002306,FBgn0003435,FBgn0003896,FBgn0004108,FBgn0004198,FBgn0004369,FBgn0004370,FBgn0004435,FBgn0004595,FBgn0004795,FBgn0004838,FBgn0005775,FBgn0010300,FBgn0010415,FBgn0010473,FBgn0011259,FBgn0014135,FBgn0015609,FBgn0015774,FBgn0016977,FBgn0022382,FBgn0033438,FBgn0034072,FBgn0036494,FBgn0040271,FBgn0040505,FBg…	extrinsic component of plasma membrane	GO:0019897	0.00914937	FBgn0000017,FBgn0001122,FBgn0004435,FBgn0005614,FBgn0017590,FBgn0024941,FBgn0259918,FBgn0262738,FBgn0267252	ubiquitin-like protein conjugating enzyme activity	GO:0061650	0.00340809	FBgn0000253,FBgn0000276,FBgn0000546,FBgn0003209,FBgn0003997,FBgn0004910,FBgn0010113,FBgn0011760,FBgn0027932,FBgn0035497,FBgn0035542,FBgn0039685,FBgn0259176,FBgn0261793,FBgn0264848
primary metabolic process	GO:0044238	6.07855e-08	FBgn0000052,FBgn0000053,FBgn0000100,FBgn0000150,FBgn0000239,FBgn0000330,FBgn0000406,FBgn0000447,FBgn0000455,FBgn0000477,FBgn0000504,FBgn0000536,FBgn0000559,FBgn0000565,FBgn0000566,FBgn0000615,FBgn0000964,FBgn0000996,FBgn0001092,FBgn0001124,FBgn0001125,FBgn0001187,FBgn0001208,FBgn0001248,FBgn0001258,FBgn0002022,FBgn0002069,FBgn0002284,FBgn0002590,FBgn0002622,FBgn0002626,FBgn0002905,FBgn0002930,FBg…					vitamin B6 binding	GO:0070279	0.0459086	FBgn0000566,FBgn0001124,FBgn0001125,FBgn0010591,FBgn0022774,FBgn0029823,FBgn0030478,FBgn0036208,FBgn0036975,FBgn0037955					Triglyceride metabolism	R-DME-8979227	0.00142194	FBgn0004797,FBgn0022160,FBgn0025592,FBgn0027579,FBgn0030607,FBgn0035266,FBgn0036449,FBgn0263593	single-organism behavior	GO:0044708	4.09208e-11	FBgn0000017,FBgn0000108,FBgn0000273,FBgn0000479,FBgn0000535,FBgn0000546,FBgn0000636,FBgn0001078,FBgn0002921,FBgn0003165,FBgn0003380,FBgn0003435,FBgn0004102,FBgn0004168,FBgn0004242,FBgn0004244,FBgn0004370,FBgn0004435,FBgn0004516,FBgn0004575,FBgn0004635,FBgn0005626,FBgn0010473,FBgn0011582,FBgn0013334,FBgn0013759,FBgn0017590,FBgn0022382,FBgn0026086,FBgn0027109,FBgn0027932,FBgn0028397,FBgn0030812,FBg…	transporter complex	GO:1990351	0.00919776	FBgn0000038,FBgn0000535,FBgn0002921,FBgn0003380,FBgn0003386,FBgn0005614,FBgn0015777,FBgn0028875,FBgn0032151,FBgn0032946,FBgn0086778,FBgn0260499,FBgn0261612,FBgn0263257,FBgn0266347	potassium channel activity	GO:0005267	0.00417914	FBgn0000535,FBgn0003380,FBgn0003386,FBgn0027556,FBgn0029761,FBgn0030745,FBgn0260499,FBgn0261612,FBgn0263257,FBgn0263397
serine family amino acid metabolic process	GO:0009069	1.75866e-07	FBgn0000566,FBgn0014031,FBgn0014427,FBgn0014455,FBgn0023129,FBgn0027945,FBgn0029823,FBgn0032224,FBgn0032287,FBgn0034276,FBgn0037801,FBgn0038074,FBgn0039094					hydrolase activity, acting on carbon-nitrogen (but not peptide) bonds	GO:0016810	0.0463659	FBgn0003189,FBgn0010222,FBgn0020385,FBgn0023535,FBgn0024945,FBgn0025615,FBgn0026428,FBgn0029689,FBgn0030653,FBgn0034046,FBgn0035806,FBgn0037513,FBgn0037687,FBgn0037818,FBgn0038172,FBgn0039052,FBgn0039241,FBgn0043578					Catabolism of glucuronate to xylulose-5-phosphate	R-DME-5661270	0.00265427	FBgn0022359,FBgn0024289,FBgn0030737,FBgn0030968,FBgn0033949,FBgn0038463	response to abiotic stimulus	GO:0009628	4.41861e-11	FBgn0000108,FBgn0000253,FBgn0000273,FBgn0000479,FBgn0001122,FBgn0002921,FBgn0003218,FBgn0003380,FBgn0003423,FBgn0003997,FBgn0004240,FBgn0004244,FBgn0004435,FBgn0004516,FBgn0004575,FBgn0004618,FBgn0005614,FBgn0005626,FBgn0010415,FBgn0010473,FBgn0011582,FBgn0011666,FBgn0011817,FBgn0013275,FBgn0013276,FBgn0013576,FBgn0013995,FBgn0023178,FBgn0023215,FBgn0026086,FBgn0030505,FBgn0031857,FBgn0032840,FBg…	muscle tendon junction	GO:0005927	0.0101008	FBgn0000017,FBgn0031850,FBgn0032731,FBgn0259745,FBgn0265991	growth factor activity	GO:0008083	0.00461811	FBgn0000490,FBgn0014135,FBgn0027111,FBgn0036752,FBgn0039914,FBgn0085407,FBgn0264270
monocarboxylic acid catabolic process	GO:0072329	3.2902e-07	FBgn0001248,FBgn0010516,FBgn0014031,FBgn0027572,FBgn0028479,FBgn0029689,FBgn0029969,FBgn0030653,FBgn0030731,FBgn0032161,FBgn0032162,FBgn0034488,FBgn0034628,FBgn0034629,FBgn0037440,FBgn0037819,FBgn0040064,FBgn0040349,FBgn0263593					aldehyde dehydrogenase (NAD) activity	GO:0004029	0.0474998	FBgn0012036,FBgn0032945,FBgn0051075					Galactose metabolism	52	0.00309464	FBgn0001187,FBgn0003076,FBgn0027552,FBgn0033101,FBgn0034117,FBgn0035147,FBgn0035978,FBgn0086254,FBgn0260746,FBgn0261575,FBgn0263199,FBgn0263200	cell adhesion	GO:0007155	1.06246e-10	FBgn0000546,FBgn0000636,FBgn0001122,FBgn0001138,FBgn0001404,FBgn0003285,FBgn0004397,FBgn0004569,FBgn0004635,FBgn0005775,FBgn0010238,FBgn0010473,FBgn0015229,FBgn0015609,FBgn0015777,FBgn0017590,FBgn0024189,FBgn0028369,FBgn0029082,FBgn0031850,FBgn0036844,FBgn0037240,FBgn0038498,FBgn0039584,FBgn0053179,FBgn0083963,FBgn0086359,FBgn0259745,FBgn0260660,FBgn0260799,FBgn0261822,FBgn0264078,FBgn0264273,FBg…	side of membrane	GO:0098552	0.0105811	FBgn0000017,FBgn0001122,FBgn0004397,FBgn0004435,FBgn0024941,FBgn0033438,FBgn0085426,FBgn0260499,FBgn0262869,FBgn0267252	RNA polymerase II transcription factor activity, ligand-activated sequence-specific DNA binding	GO:0004879	0.0050183	FBgn0000448,FBgn0000546,FBgn0000568,FBgn0001078,FBgn0002723,FBgn0261703
ribosomal large subunit biogenesis	GO:0042273	6.88127e-07	FBgn0005593,FBgn0013325,FBgn0014026,FBgn0015393,FBgn0024733,FBgn0025366,FBgn0026372,FBgn0028744,FBgn0029148,FBgn0029785,FBgn0030878,FBgn0032050,FBgn0032404,FBgn0032518,FBgn0033741,FBgn0034968,FBgn0036213,FBgn0036460,FBgn0037899,FBgn0038473,FBgn0064225					carbon-carbon lyase activity	GO:0016830	0.0479698	FBgn0003067,FBgn0010591,FBgn0013307,FBgn0019932,FBgn0020513,FBgn0026576,FBgn0033428,FBgn0033735,FBgn0034356,FBgn0036975,FBgn0039094					Metabolism of nucleotides	R-DME-15869	0.00360568	FBgn0000052,FBgn0000053,FBgn0000239,FBgn0000447,FBgn0003189,FBgn0003204,FBgn0003308,FBgn0019982,FBgn0020513,FBgn0027493,FBgn0031489,FBgn0035348,FBgn0036337,FBgn0037513,FBgn0038467,FBgn0039241,FBgn0039464,FBgn0041194,FBgn0086450,FBgn0267408	synapse organization	GO:0050808	1.31098e-10	FBgn0000017,FBgn0000044,FBgn0000108,FBgn0001122,FBgn0002921,FBgn0003165,FBgn0004516,FBgn0004575,FBgn0004595,FBgn0005586,FBgn0010300,FBgn0010415,FBgn0011259,FBgn0011817,FBgn0013759,FBgn0020386,FBgn0029974,FBgn0030897,FBgn0034286,FBgn0034720,FBgn0034789,FBgn0036544,FBgn0038063,FBgn0038980,FBgn0040726,FBgn0040752,FBgn0040823,FBgn0041605,FBgn0051708,FBgn0052057,FBgn0052791,FBgn0053481,FBgn0083228,FBg…	rhabdomere membrane	GO:0033583	0.0111807	FBgn0005614,FBgn0034789,FBgn0259918	transcription factor activity, direct ligand regulated sequence-specific DNA binding	GO:0098531	0.0050183	FBgn0000448,FBgn0000546,FBgn0000568,FBgn0001078,FBgn0002723,FBgn0261703
cellular amino acid catabolic process	GO:0009063	7.47553e-07	FBgn0001125,FBgn0001208,FBgn0003965,FBgn0014455,FBgn0023535,FBgn0027945,FBgn0029689,FBgn0030653,FBgn0031824,FBgn0032287,FBgn0034276,FBgn0035911,FBgn0036208,FBgn0037709,FBgn0037801,FBgn0039094													Glycerolipid metabolism	561	0.0042989	FBgn0004797,FBgn0012036,FBgn0025592,FBgn0027552,FBgn0027579,FBgn0031428,FBgn0033101,FBgn0034117,FBgn0035266,FBgn0036622,FBgn0036857,FBgn0037166,FBgn0037167,FBgn0051075,FBgn0086254	biological adhesion	GO:0022610	1.64158e-10	FBgn0000546,FBgn0000636,FBgn0001122,FBgn0001138,FBgn0001404,FBgn0003285,FBgn0004397,FBgn0004569,FBgn0004635,FBgn0005775,FBgn0010238,FBgn0010473,FBgn0015229,FBgn0015609,FBgn0015777,FBgn0017590,FBgn0024189,FBgn0028369,FBgn0029082,FBgn0031850,FBgn0036844,FBgn0037240,FBgn0038498,FBgn0039584,FBgn0053179,FBgn0083963,FBgn0086359,FBgn0259745,FBgn0260660,FBgn0260799,FBgn0261822,FBgn0264078,FBgn0264273,FBg…	postsynapse	GO:0098794	0.0135548	FBgn0000038,FBgn0003165,FBgn0025726,FBgn0028400,FBgn0028408,FBgn0028875,FBgn0032151,FBgn0040752,FBgn0086778,FBgn0266347	voltage-gated cation channel activity	GO:0022843	0.00525983	FBgn0000535,FBgn0003380,FBgn0003386,FBgn0085426,FBgn0260499,FBgn0261612,FBgn0263257,FBgn0263397
ribonucleoprotein complex biogenesis	GO:0022613	1.42962e-06	FBgn0000100,FBgn0003062,FBgn0003517,FBgn0004926,FBgn0005533,FBgn0005593,FBgn0010411,FBgn0011824,FBgn0013325,FBgn0014026,FBgn0015075,FBgn0015393,FBgn0015521,FBgn0020909,FBgn0023542,FBgn0024733,FBgn0025366,FBgn0026196,FBgn0026372,FBgn0028744,FBgn0029148,FBgn0029714,FBgn0029785,FBgn0030177,FBgn0030720,FBgn0030878,FBgn0032050,FBgn0032404,FBgn0032518,FBgn0033454,FBgn0033741,FBgn0034743,FBgn0034968,FBg…													COPI-dependent Golgi-to-ER retrograde traffic	R-DME-6811434	0.00654718	FBgn0008635,FBgn0019925,FBgn0025724,FBgn0025725,FBgn0028969,FBgn0029709,FBgn0037182,FBgn0040512,FBgn0053105,FBgn0069242,FBgn0267330	signal transduction	GO:0007165	2.00201e-10	FBgn0000017,FBgn0000038,FBgn0000253,FBgn0000273,FBgn0000276,FBgn0000448,FBgn0000479,FBgn0000490,FBgn0000535,FBgn0000546,FBgn0000568,FBgn0001078,FBgn0001122,FBgn0001139,FBgn0001235,FBgn0002723,FBgn0003165,FBgn0003209,FBgn0003218,FBgn0003285,FBgn0003463,FBgn0003896,FBgn0003997,FBgn0004168,FBgn0004198,FBgn0004244,FBgn0004369,FBgn0004370,FBgn0004435,FBgn0004569,FBgn0004635,FBgn0004858,FBgn0004865,FBg…	plasma membrane protein complex	GO:0098797	0.015558	FBgn0001122,FBgn0004435,FBgn0005614,FBgn0024941,FBgn0025391,FBgn0029082,FBgn0034072,FBgn0259918,FBgn0261836,FBgn0262736,FBgn0262738,FBgn0264078,FBgn0267252,FBgn0270928	ion transmembrane transporter activity	GO:0015075	0.00624585	FBgn0000038,FBgn0000253,FBgn0000535,FBgn0002921,FBgn0003218,FBgn0003380,FBgn0003386,FBgn0004244,FBgn0005614,FBgn0013673,FBgn0013995,FBgn0015558,FBgn0015777,FBgn0027556,FBgn0028704,FBgn0028875,FBgn0029663,FBgn0029761,FBgn0029762,FBgn0030745,FBgn0031424,FBgn0032151,FBgn0034497,FBgn0035505,FBgn0039561,FBgn0040697,FBgn0051100,FBgn0053181,FBgn0053988,FBgn0085426,FBgn0086778,FBgn0259918,FBgn0260499,FBg…
alpha-amino acid catabolic process	GO:1901606	2.26658e-06	FBgn0001125,FBgn0001208,FBgn0003965,FBgn0014455,FBgn0023535,FBgn0027945,FBgn0029689,FBgn0030653,FBgn0031824,FBgn0032287,FBgn0034276,FBgn0035911,FBgn0036208,FBgn0037801,FBgn0039094													XBP1(S) activates chaperone genes	R-DME-381038	0.00657382	FBgn0010638,FBgn0031049,FBgn0033191,FBgn0035771,FBgn0047135,FBgn0086357	regulation of multicellular organismal development	GO:2000026	4.12554e-10	FBgn0000017,FBgn0000273,FBgn0000308,FBgn0000490,FBgn0000546,FBgn0000568,FBgn0001122,FBgn0001138,FBgn0001235,FBgn0003165,FBgn0003209,FBgn0003285,FBgn0003997,FBgn0004102,FBgn0004242,FBgn0004395,FBgn0004435,FBgn0004569,FBgn0004595,FBgn0004876,FBgn0005626,FBgn0010113,FBgn0010300,FBgn0010415,FBgn0010473,FBgn0011259,FBgn0011760,FBgn0011817,FBgn0013343,FBgn0013759,FBgn0013799,FBgn0014135,FBgn0015609,FBg…	supramolecular fiber	GO:0099512	0.0186869	FBgn0000044,FBgn0000046,FBgn0002773,FBgn0004117,FBgn0004169,FBgn0005666,FBgn0024238,FBgn0025391,FBgn0026620,FBgn0027556,FBgn0033926,FBgn0034072,FBgn0038294,FBgn0039897,FBgn0051363,FBgn0052311,FBgn0063485,FBgn0261836,FBgn0263391,FBgn0264975,FBgn0265487,FBgn0265991,FBgn0266579	calcium ion binding	GO:0005509	0.00636486	FBgn0000253,FBgn0002773,FBgn0004169,FBgn0004242,FBgn0004580,FBgn0004910,FBgn0013995,FBgn0015609,FBgn0015664,FBgn0024238,FBgn0028704,FBgn0030897,FBgn0031850,FBgn0032731,FBgn0034072,FBgn0039054,FBgn0039634,FBgn0053978,FBgn0083228,FBgn0262738,FBgn0264975,FBgn0265595
small molecule biosynthetic process	GO:0044283	3.26392e-06	FBgn0000566,FBgn0001124,FBgn0001125,FBgn0003067,FBgn0003074,FBgn0014031,FBgn0014427,FBgn0015781,FBgn0020236,FBgn0020385,FBgn0023129,FBgn0026565,FBgn0027580,FBgn0029823,FBgn0029969,FBgn0030407,FBgn0030482,FBgn0030518,FBgn0032076,FBgn0032224,FBgn0032394,FBgn0032727,FBgn0032820,FBgn0033246,FBgn0034356,FBgn0037001,FBgn0037356,FBgn0038074,FBgn0039094,FBgn0051472,FBgn0052068,FBgn0085453,FBgn0086355,FBg…													Pyruvate metabolism	620	0.00949087	FBgn0001258,FBgn0002719,FBgn0003067,FBgn0012034,FBgn0012036,FBgn0027552,FBgn0027580,FBgn0029969,FBgn0033101,FBgn0033246,FBgn0034356,FBgn0036857,FBgn0051075,FBgn0086254,FBgn0262782	tissue development	GO:0009888	4.54009e-10	FBgn0000017,FBgn0000044,FBgn0000179,FBgn0000273,FBgn0000289,FBgn0000308,FBgn0000489,FBgn0000490,FBgn0000546,FBgn0000633,FBgn0000636,FBgn0000659,FBgn0000810,FBgn0001078,FBgn0001122,FBgn0001138,FBgn0001235,FBgn0001404,FBgn0003209,FBgn0003285,FBgn0003463,FBgn0003475,FBgn0003896,FBgn0003997,FBgn0004102,FBgn0004169,FBgn0004198,FBgn0004395,FBgn0004569,FBgn0004635,FBgn0004838,FBgn0004858,FBgn0004919,FBg…	membrane part	GO:0044425	0.0189125	FBgn0000017,FBgn0000038,FBgn0000253,FBgn0000273,FBgn0000308,FBgn0000490,FBgn0000535,FBgn0000546,FBgn0000636,FBgn0001122,FBgn0001404,FBgn0002306,FBgn0002921,FBgn0003218,FBgn0003285,FBgn0003380,FBgn0003386,FBgn0004108,FBgn0004168,FBgn0004242,FBgn0004244,FBgn0004369,FBgn0004370,FBgn0004397,FBgn0004435,FBgn0004635,FBgn0004957,FBgn0005614,FBgn0010113,FBgn0010473,FBgn0011259,FBgn0011288,FBgn0011582,FBg…	Atg12 transferase activity	GO:0019777	0.00647535	FBgn0000253,FBgn0000276,FBgn0000546,FBgn0003209,FBgn0003997,FBgn0004910,FBgn0010113,FBgn0011760,FBgn0027932,FBgn0035497,FBgn0035542,FBgn0039685,FBgn0259176,FBgn0261793
fatty acid oxidation	GO:0019395	3.34541e-06	FBgn0001248,FBgn0010516,FBgn0027572,FBgn0028479,FBgn0029969,FBgn0030731,FBgn0032161,FBgn0032162,FBgn0034488,FBgn0034628,FBgn0034629,FBgn0037440,FBgn0037819,FBgn0038984,FBgn0040064,FBgn0040349													IRE1alpha activates chaperones	R-DME-381070	0.0138862	FBgn0010638,FBgn0031049,FBgn0033191,FBgn0035771,FBgn0047135,FBgn0086357	neuron projection guidance	GO:0097485	4.92528e-10	FBgn0000017,FBgn0000253,FBgn0000308,FBgn0000636,FBgn0001138,FBgn0001404,FBgn0002306,FBgn0003435,FBgn0003896,FBgn0004108,FBgn0004198,FBgn0004369,FBgn0004370,FBgn0004435,FBgn0004595,FBgn0004795,FBgn0004838,FBgn0010300,FBgn0010415,FBgn0010473,FBgn0011259,FBgn0015609,FBgn0015774,FBgn0016977,FBgn0022382,FBgn0033438,FBgn0034072,FBgn0036494,FBgn0040271,FBgn0040505,FBgn0041097,FBgn0086677,FBgn0086680,FBg…	supramolecular polymer	GO:0099081	0.021015	FBgn0000044,FBgn0000046,FBgn0002773,FBgn0004117,FBgn0004169,FBgn0005666,FBgn0024238,FBgn0025391,FBgn0026620,FBgn0027556,FBgn0033926,FBgn0034072,FBgn0038294,FBgn0039897,FBgn0051363,FBgn0052311,FBgn0063485,FBgn0261836,FBgn0263391,FBgn0264975,FBgn0265487,FBgn0265991,FBgn0266579	Atg12 activating enzyme activity	GO:0019778	0.00647535	FBgn0000253,FBgn0000276,FBgn0000546,FBgn0003209,FBgn0003997,FBgn0004910,FBgn0010113,FBgn0011760,FBgn0027932,FBgn0035497,FBgn0035542,FBgn0039685,FBgn0259176,FBgn0261793
cellular lipid catabolic process	GO:0044242	4.88555e-06	FBgn0001248,FBgn0010516,FBgn0010591,FBgn0027572,FBgn0028479,FBgn0029969,FBgn0030607,FBgn0030731,FBgn0032161,FBgn0032162,FBgn0034488,FBgn0034628,FBgn0034629,FBgn0034997,FBgn0036449,FBgn0036836,FBgn0037440,FBgn0037819,FBgn0040064,FBgn0040349,FBgn0051414,FBgn0263593													Metabolism of folate and pterines	R-DME-196757	0.0146291	FBgn0010222,FBgn0020385,FBgn0029823,FBgn0030407,FBgn0032945,FBgn0036157,FBgn0050344,FBgn0085453,FBgn0260388	negative regulation of biological process	GO:0048519	9.12224e-10	FBgn0000017,FBgn0000108,FBgn0000179,FBgn0000253,FBgn0000273,FBgn0000308,FBgn0000439,FBgn0000448,FBgn0000490,FBgn0000546,FBgn0000568,FBgn0000659,FBgn0000810,FBgn0001122,FBgn0001139,FBgn0001323,FBgn0002521,FBgn0002723,FBgn0003165,FBgn0003209,FBgn0003463,FBgn0003896,FBgn0004102,FBgn0004168,FBgn0004198,FBgn0004244,FBgn0004435,FBgn0004569,FBgn0004580,FBgn0004595,FBgn0004635,FBgn0004795,FBgn0004838,FBg…	inaD signaling complex	GO:0016027	0.0212141	FBgn0004435,FBgn0005614,FBgn0259918,FBgn0262738	Atg8-specific protease activity	GO:0019786	0.00647535	FBgn0000253,FBgn0000276,FBgn0000546,FBgn0003209,FBgn0003997,FBgn0004910,FBgn0010113,FBgn0011760,FBgn0027932,FBgn0035497,FBgn0035542,FBgn0039685,FBgn0259176,FBgn0261793
lipid oxidation	GO:0034440	5.21614e-06	FBgn0001248,FBgn0010516,FBgn0027572,FBgn0028479,FBgn0029969,FBgn0030731,FBgn0032161,FBgn0032162,FBgn0034488,FBgn0034628,FBgn0034629,FBgn0037440,FBgn0037819,FBgn0038984,FBgn0040064,FBgn0040349													Metabolism of lipids	R-DME-556833	0.0146487	FBgn0000055,FBgn0000056,FBgn0000536,FBgn0003656,FBgn0004045,FBgn0004047,FBgn0004797,FBgn0005391,FBgn0010226,FBgn0010241,FBgn0010591,FBgn0010611,FBgn0013773,FBgn0015039,FBgn0015040,FBgn0015808,FBgn0020236,FBgn0022160,FBgn0025454,FBgn0025592,FBgn0027348,FBgn0027506,FBgn0027572,FBgn0027579,FBgn0028479,FBgn0028519,FBgn0029969,FBgn0030607,FBgn0030731,FBgn0030828,FBgn0031126,FBgn0031703,FBgn0032029,FBg…	chemical synaptic transmission	GO:0007268	1.35661e-09	FBgn0000017,FBgn0000038,FBgn0000273,FBgn0000479,FBgn0002921,FBgn0003165,FBgn0003380,FBgn0004242,FBgn0004244,FBgn0004435,FBgn0004575,FBgn0005586,FBgn0011288,FBgn0013334,FBgn0013342,FBgn0013343,FBgn0013759,FBgn0025726,FBgn0028400,FBgn0028582,FBgn0028875,FBgn0030505,FBgn0030897,FBgn0031424,FBgn0032151,FBgn0032901,FBgn0034072,FBgn0035756,FBgn0038659,FBgn0040505,FBgn0041605,FBgn0053547,FBgn0083228,FBg…	supramolecular complex	GO:0099080	0.0231812	FBgn0000044,FBgn0000046,FBgn0002773,FBgn0004117,FBgn0004169,FBgn0005666,FBgn0024238,FBgn0025391,FBgn0026620,FBgn0027556,FBgn0033926,FBgn0034072,FBgn0038294,FBgn0039897,FBgn0051363,FBgn0052311,FBgn0063485,FBgn0261836,FBgn0263391,FBgn0264975,FBgn0265487,FBgn0265991,FBgn0266579	Atg12 conjugating enzyme activity	GO:0061651	0.00647535	FBgn0000253,FBgn0000276,FBgn0000546,FBgn0003209,FBgn0003997,FBgn0004910,FBgn0010113,FBgn0011760,FBgn0027932,FBgn0035497,FBgn0035542,FBgn0039685,FBgn0259176,FBgn0261793
nucleobase-containing small molecule metabolic process	GO:0055086	9.87493e-06	FBgn0000052,FBgn0000053,FBgn0000150,FBgn0000239,FBgn0000447,FBgn0001092,FBgn0001187,FBgn0003074,FBgn0003116,FBgn0003189,FBgn0003204,FBgn0003308,FBgn0004057,FBgn0004654,FBgn0004852,FBgn0010217,FBgn0010516,FBgn0011205,FBgn0011703,FBgn0014455,FBgn0016691,FBgn0019644,FBgn0019957,FBgn0020235,FBgn0020385,FBgn0020513,FBgn0021765,FBgn0022160,FBgn0022710,FBgn0023477,FBgn0023537,FBgn0027493,FBgn0027621,FBg…													Metabolism of proteins	R-DME-392499	0.0157205	FBgn0000100,FBgn0000559,FBgn0002284,FBgn0002590,FBgn0002622,FBgn0002626,FBgn0003274,FBgn0003279,FBgn0003517,FBgn0003676,FBgn0003941,FBgn0004403,FBgn0004867,FBgn0004926,FBgn0005533,FBgn0005593,FBgn0008635,FBgn0010198,FBgn0010265,FBgn0010408,FBgn0010411,FBgn0010638,FBgn0010747,FBgn0011272,FBgn0011284,FBgn0013325,FBgn0014002,FBgn0014026,FBgn0015019,FBgn0015288,FBgn0015521,FBgn0015622,FBgn0015756,FBg…	anterograde trans-synaptic signaling	GO:0098916	1.35661e-09	FBgn0000017,FBgn0000038,FBgn0000273,FBgn0000479,FBgn0002921,FBgn0003165,FBgn0003380,FBgn0004242,FBgn0004244,FBgn0004435,FBgn0004575,FBgn0005586,FBgn0011288,FBgn0013334,FBgn0013342,FBgn0013343,FBgn0013759,FBgn0025726,FBgn0028400,FBgn0028582,FBgn0028875,FBgn0030505,FBgn0030897,FBgn0031424,FBgn0032151,FBgn0032901,FBgn0034072,FBgn0035756,FBgn0038659,FBgn0040505,FBgn0041605,FBgn0053547,FBgn0083228,FBg…	septate junction	GO:0005918	0.0245754	FBgn0000636,FBgn0002921,FBgn0010238,FBgn0015777,FBgn0037240,FBgn0264975,FBgn0266409	Atg12 ligase activity	GO:0061660	0.00647535	FBgn0000253,FBgn0000276,FBgn0000546,FBgn0003209,FBgn0003997,FBgn0004910,FBgn0010113,FBgn0011760,FBgn0027932,FBgn0035497,FBgn0035542,FBgn0039685,FBgn0259176,FBgn0261793
protein localization to endoplasmic reticulum	GO:0070972	1.14815e-05	FBgn0010391,FBgn0010638,FBgn0010747,FBgn0011016,FBgn0021795,FBgn0025700,FBgn0030306,FBgn0035771,FBgn0035947,FBgn0036300,FBgn0038810,FBgn0039172,FBgn0267330													Metabolism of polyamines	R-DME-351202	0.0164161	FBgn0002284,FBgn0013307,FBgn0016697,FBgn0019932,FBgn0023535,FBgn0028686,FBgn0028689,FBgn0028693,FBgn0030218,FBgn0032076,FBgn0034215,FBgn0036749,FBgn0036750,FBgn0037723,FBgn0050382,FBgn0052068,FBgn0250746,FBgn0261394,FBgn0261396,FBgn0263121	trans-synaptic signaling	GO:0099537	1.35661e-09	FBgn0000017,FBgn0000038,FBgn0000273,FBgn0000479,FBgn0002921,FBgn0003165,FBgn0003380,FBgn0004242,FBgn0004244,FBgn0004435,FBgn0004575,FBgn0005586,FBgn0011288,FBgn0013334,FBgn0013342,FBgn0013343,FBgn0013759,FBgn0025726,FBgn0028400,FBgn0028582,FBgn0028875,FBgn0030505,FBgn0030897,FBgn0031424,FBgn0032151,FBgn0032901,FBgn0034072,FBgn0035756,FBgn0038659,FBgn0040505,FBgn0041605,FBgn0053547,FBgn0083228,FBg…	Cajal body	GO:0015030	0.0245754	FBgn0003920,FBgn0003922,FBgn0003923,FBgn0004191,FBgn0004192,FBgn0041720,FBgn0260400	transcription factor binding	GO:0008134	0.00910575	FBgn0000439,FBgn0000546,FBgn0000659,FBgn0001078,FBgn0001138,FBgn0001139,FBgn0001235,FBgn0002723,FBgn0003896,FBgn0004795,FBgn0010825,FBgn0011766,FBgn0026262,FBgn0028397,FBgn0030034,FBgn0033865,FBgn0034795,FBgn0035542,FBgn0036746,FBgn0037698,FBgn0052062,FBgn0085432,FBgn0261703,FBgn0285917
fatty acid catabolic process	GO:0009062	1.21992e-05	FBgn0001248,FBgn0010516,FBgn0027572,FBgn0028479,FBgn0029969,FBgn0030731,FBgn0032161,FBgn0032162,FBgn0034488,FBgn0034628,FBgn0034629,FBgn0037440,FBgn0037819,FBgn0040064,FBgn0040349,FBgn0263593													beta-Alanine metabolism	410	0.0207332	FBgn0012036,FBgn0028479,FBgn0036857,FBgn0037513,FBgn0037723,FBgn0038326,FBgn0051075,FBgn0086450	synaptic signaling	GO:0099536	1.45063e-09	FBgn0000017,FBgn0000038,FBgn0000273,FBgn0000479,FBgn0002921,FBgn0003165,FBgn0003380,FBgn0004242,FBgn0004244,FBgn0004435,FBgn0004575,FBgn0005586,FBgn0011288,FBgn0013334,FBgn0013342,FBgn0013343,FBgn0013759,FBgn0025726,FBgn0028400,FBgn0028582,FBgn0028875,FBgn0030505,FBgn0030897,FBgn0031424,FBgn0032151,FBgn0032901,FBgn0034072,FBgn0035756,FBgn0038659,FBgn0040505,FBgn0041605,FBgn0053547,FBgn0083228,FBg…	cell projection part	GO:0044463	0.026029	FBgn0003165,FBgn0003218,FBgn0004242,FBgn0004435,FBgn0004575,FBgn0004580,FBgn0005614,FBgn0005775,FBgn0011288,FBgn0013342,FBgn0013343,FBgn0013759,FBgn0015774,FBgn0025726,FBgn0032901,FBgn0034789,FBgn0040505,FBgn0040823,FBgn0041605,FBgn0052057,FBgn0052791,FBgn0086677,FBgn0086778,FBgn0259168,FBgn0259918,FBgn0262738	hormone activity	GO:0005179	0.0107933	FBgn0023178,FBgn0027109,FBgn0032048,FBgn0032840,FBgn0035023,FBgn0035092,FBgn0037976,FBgn0042201,FBgn0045038
tRNA aminoacylation for protein translation	GO:0006418	1.833e-05	FBgn0002069,FBgn0005674,FBgn0027079,FBgn0027080,FBgn0027081,FBgn0027084,FBgn0027086,FBgn0027087,FBgn0027088,FBgn0027090,FBgn0027091,FBgn0027093,FBgn0027094,FBgn0031497,FBgn0034401,FBgn0086443													Arginine and proline metabolism	330	0.0226841	FBgn0001124,FBgn0001125,FBgn0012036,FBgn0013307,FBgn0015781,FBgn0019932,FBgn0022774,FBgn0023535,FBgn0026565,FBgn0031860,FBgn0032076,FBgn0036857,FBgn0037723,FBgn0037818,FBgn0051075	cell-cell signaling	GO:0007267	1.94325e-09	FBgn0000017,FBgn0000038,FBgn0000253,FBgn0000273,FBgn0000479,FBgn0001122,FBgn0001139,FBgn0002921,FBgn0003165,FBgn0003285,FBgn0003380,FBgn0004242,FBgn0004244,FBgn0004435,FBgn0004569,FBgn0004575,FBgn0004838,FBgn0004957,FBgn0005586,FBgn0010473,FBgn0011206,FBgn0011288,FBgn0011817,FBgn0013334,FBgn0013342,FBgn0013343,FBgn0013759,FBgn0015024,FBgn0016977,FBgn0025726,FBgn0028400,FBgn0028582,FBgn0028875,FBg…	plasma membrane bounded cell projection part	GO:0120038	0.026029	FBgn0003165,FBgn0003218,FBgn0004242,FBgn0004435,FBgn0004575,FBgn0004580,FBgn0005614,FBgn0005775,FBgn0011288,FBgn0013342,FBgn0013343,FBgn0013759,FBgn0015774,FBgn0025726,FBgn0032901,FBgn0034789,FBgn0040505,FBgn0040823,FBgn0041605,FBgn0052057,FBgn0052791,FBgn0086677,FBgn0086778,FBgn0259168,FBgn0259918,FBgn0262738	gated channel activity	GO:0022836	0.0142333	FBgn0000038,FBgn0000535,FBgn0003380,FBgn0003386,FBgn0004244,FBgn0028875,FBgn0029761,FBgn0030745,FBgn0032151,FBgn0053988,FBgn0085426,FBgn0086778,FBgn0260499,FBgn0261612,FBgn0263257,FBgn0263397,FBgn0264908,FBgn0264953,FBgn0266347
tRNA aminoacylation	GO:0043039	1.833e-05	FBgn0002069,FBgn0005674,FBgn0027079,FBgn0027080,FBgn0027081,FBgn0027084,FBgn0027086,FBgn0027087,FBgn0027088,FBgn0027090,FBgn0027091,FBgn0027093,FBgn0027094,FBgn0031497,FBgn0034401,FBgn0086443													Plasma lipoprotein assembly, remodeling, and clearance	R-DME-174824	0.0256055	FBgn0014002,FBgn0031516,FBgn0032167,FBgn0037612,FBgn0042175,FBgn0051683,FBgn0087002,FBgn0260866,FBgn0264494,FBgn0266369	axon guidance	GO:0007411	2.31311e-09	FBgn0000017,FBgn0000253,FBgn0000308,FBgn0000636,FBgn0001138,FBgn0001404,FBgn0002306,FBgn0003435,FBgn0003896,FBgn0004108,FBgn0004369,FBgn0004370,FBgn0004435,FBgn0004595,FBgn0004795,FBgn0004838,FBgn0010300,FBgn0010415,FBgn0010473,FBgn0011259,FBgn0015609,FBgn0015774,FBgn0016977,FBgn0022382,FBgn0033438,FBgn0034072,FBgn0040271,FBgn0040505,FBgn0041097,FBgn0086677,FBgn0086680,FBgn0260660,FBgn0263391,FBg…	cell-cell adherens junction	GO:0005913	0.0286314	FBgn0000636,FBgn0003285,FBgn0029082,FBgn0260799,FBgn0265991	transcriptional activator activity, RNA polymerase II transcription regulatory region sequence-specific binding	GO:0001228	0.0144202	FBgn0000546,FBgn0001078,FBgn0001138,FBgn0004102,FBgn0004795,FBgn0011481,FBgn0011766,FBgn0085432,FBgn0086680,FBgn0265193
amino acid activation	GO:0043038	2.66917e-05	FBgn0002069,FBgn0005674,FBgn0027079,FBgn0027080,FBgn0027081,FBgn0027084,FBgn0027086,FBgn0027087,FBgn0027088,FBgn0027090,FBgn0027091,FBgn0027093,FBgn0027094,FBgn0031497,FBgn0034401,FBgn0086443													Carnitine synthesis	R-DME-71262	0.025821	FBgn0014903,FBgn0029823,FBgn0030575,FBgn0038795	learning or memory	GO:0007611	4.32672e-09	FBgn0000017,FBgn0000108,FBgn0000273,FBgn0000479,FBgn0000535,FBgn0000546,FBgn0000636,FBgn0003165,FBgn0003380,FBgn0004168,FBgn0004244,FBgn0004370,FBgn0004516,FBgn0004575,FBgn0004635,FBgn0011582,FBgn0013334,FBgn0013759,FBgn0017590,FBgn0028397,FBgn0030812,FBgn0035016,FBgn0040505,FBgn0052062,FBgn0053207,FBgn0250823,FBgn0259168,FBgn0259246,FBgn0260793,FBgn0262477,FBgn0262739,FBgn0265784	receptor complex	GO:0043235	0.0347187	FBgn0000038,FBgn0000546,FBgn0028875,FBgn0032151,FBgn0086778,FBgn0260446,FBgn0261612,FBgn0261836,FBgn0263257,FBgn0266347	collagen binding	GO:0005518	0.0145836	FBgn0000490,FBgn0003463,FBgn0085409
protein complex subunit organization	GO:0071822	2.86542e-05	FBgn0000100,FBgn0000565,FBgn0002590,FBgn0002622,FBgn0002626,FBgn0003274,FBgn0003279,FBgn0003517,FBgn0003941,FBgn0003942,FBgn0003965,FBgn0004403,FBgn0004867,FBgn0005533,FBgn0005593,FBgn0010198,FBgn0010225,FBgn0010265,FBgn0010391,FBgn0010408,FBgn0010411,FBgn0010747,FBgn0011272,FBgn0011284,FBgn0013325,FBgn0014026,FBgn0015288,FBgn0015521,FBgn0015756,FBgn0016726,FBgn0017545,FBgn0017579,FBgn0020910,FBg…													Amino sugar and nucleotide sugar metabolism	520	0.0270661	FBgn0001187,FBgn0003074,FBgn0003076,FBgn0031717,FBgn0033377,FBgn0035147,FBgn0035978,FBgn0036211,FBgn0036300,FBgn0037279,FBgn0037744,FBgn0039690,FBgn0263199,FBgn0263200	cognition	GO:0050890	4.32672e-09	FBgn0000017,FBgn0000108,FBgn0000273,FBgn0000479,FBgn0000535,FBgn0000546,FBgn0000636,FBgn0003165,FBgn0003380,FBgn0004168,FBgn0004244,FBgn0004370,FBgn0004516,FBgn0004575,FBgn0004635,FBgn0011582,FBgn0013334,FBgn0013759,FBgn0017590,FBgn0028397,FBgn0030812,FBgn0035016,FBgn0040505,FBgn0052062,FBgn0053207,FBgn0250823,FBgn0259168,FBgn0259246,FBgn0260793,FBgn0262477,FBgn0262739,FBgn0265784	cell cortex region	GO:0099738	0.0371736	FBgn0000017,FBgn0004595,FBgn0010300,FBgn0024238,FBgn0034408,FBgn0053547,FBgn0259246,FBgn0261822,FBgn0262483	protein dimerization activity	GO:0046983	0.0148677	FBgn0000289,FBgn0000490,FBgn0000546,FBgn0000636,FBgn0001078,FBgn0001994,FBgn0002723,FBgn0004102,FBgn0004242,FBgn0004828,FBgn0005614,FBgn0010238,FBgn0010313,FBgn0011760,FBgn0011766,FBgn0015609,FBgn0022238,FBgn0023215,FBgn0023531,FBgn0028550,FBgn0032202,FBgn0033403,FBgn0034720,FBgn0259176,FBgn0259211,FBgn0260446,FBgn0261703,FBgn0263102,FBgn0263772,FBgn0264001,FBgn0264493,FBgn0265193,FBgn0265784,FBg…
rRNA processing	GO:0006364	4.82199e-05	FBgn0003062,FBgn0003517,FBgn0005593,FBgn0011824,FBgn0014026,FBgn0015393,FBgn0015521,FBgn0025366,FBgn0026196,FBgn0028744,FBgn0029148,FBgn0029714,FBgn0029785,FBgn0030177,FBgn0030720,FBgn0032050,FBgn0032404,FBgn0033454,FBgn0033741,FBgn0034743,FBgn0036213,FBgn0036686,FBgn0036916,FBgn0037073,FBgn0037137,FBgn0037529,FBgn0038146,FBgn0038964,FBgn0039713,FBgn0086451,FBgn0261592													Unfolded Protein Response (UPR)	R-DME-381119	0.0285946	FBgn0010638,FBgn0031049,FBgn0033191,FBgn0035771,FBgn0047135,FBgn0086357,FBgn0261609	regulation of cell communication	GO:0010646	8.61476e-09	FBgn0000253,FBgn0000273,FBgn0000479,FBgn0000490,FBgn0001122,FBgn0001139,FBgn0001235,FBgn0003165,FBgn0003209,FBgn0003218,FBgn0003380,FBgn0003463,FBgn0004168,FBgn0004198,FBgn0004242,FBgn0004244,FBgn0004435,FBgn0004569,FBgn0004635,FBgn0004876,FBgn0004957,FBgn0005586,FBgn0010825,FBgn0011288,FBgn0011582,FBgn0011817,FBgn0013334,FBgn0013759,FBgn0014135,FBgn0015024,FBgn0015399,FBgn0015400,FBgn0016977,FBg…	cAMP-dependent protein kinase complex	GO:0005952	0.0402467	FBgn0000273,FBgn0000489,FBgn0022382	heparin binding	GO:0008201	0.0148953	FBgn0000108,FBgn0000490,FBgn0011259,FBgn0027111,FBgn0031850
cellular macromolecular complex assembly	GO:0034622	5.6331e-05	FBgn0000100,FBgn0002590,FBgn0002622,FBgn0002626,FBgn0003274,FBgn0003279,FBgn0003517,FBgn0003941,FBgn0003942,FBgn0004403,FBgn0004867,FBgn0004926,FBgn0005533,FBgn0005593,FBgn0010198,FBgn0010225,FBgn0010265,FBgn0010391,FBgn0010408,FBgn0010411,FBgn0010747,FBgn0011272,FBgn0011284,FBgn0013325,FBgn0014026,FBgn0015268,FBgn0015288,FBgn0015521,FBgn0015756,FBgn0015834,FBgn0016726,FBgn0017545,FBgn0017579,FBg…													Tryptophan metabolism	380	0.0290321	FBgn0003965,FBgn0012036,FBgn0028479,FBgn0029969,FBgn0031824,FBgn0036857,FBgn0037955,FBgn0051075	regulation of signaling	GO:0023051	9.00823e-09	FBgn0000253,FBgn0000273,FBgn0000479,FBgn0000490,FBgn0001122,FBgn0001139,FBgn0001235,FBgn0003165,FBgn0003209,FBgn0003218,FBgn0003380,FBgn0003463,FBgn0004168,FBgn0004198,FBgn0004242,FBgn0004244,FBgn0004435,FBgn0004569,FBgn0004635,FBgn0004876,FBgn0004957,FBgn0005586,FBgn0010825,FBgn0011288,FBgn0011582,FBgn0011817,FBgn0013334,FBgn0013759,FBgn0014135,FBgn0015024,FBgn0015399,FBgn0015400,FBgn0016977,FBg…	type Is terminal bouton	GO:0061177	0.0402467	FBgn0003165,FBgn0040505,FBgn0086677	actin binding	GO:0003779	0.0150028	FBgn0000308,FBgn0003475,FBgn0004117,FBgn0004397,FBgn0005666,FBgn0024238,FBgn0026084,FBgn0039897,FBgn0052264,FBgn0052311,FBgn0063485,FBgn0085446,FBgn0261836,FBgn0265935,FBgn0265991
catabolic process	GO:0009056	8.22892e-05	FBgn0000055,FBgn0000477,FBgn0000565,FBgn0001092,FBgn0001125,FBgn0001187,FBgn0001208,FBgn0001220,FBgn0001248,FBgn0002284,FBgn0003074,FBgn0003076,FBgn0003116,FBgn0003308,FBgn0003507,FBgn0003748,FBgn0003941,FBgn0003965,FBgn0010516,FBgn0010591,FBgn0010638,FBgn0013269,FBgn0013763,FBgn0014031,FBgn0014455,FBgn0016697,FBgn0023535,FBgn0024314,FBgn0025454,FBgn0027572,FBgn0027621,FBgn0027945,FBgn0028479,FBg…													ABC-family proteins mediated transport	R-DME-382556	0.0308612	FBgn0004926,FBgn0010241,FBgn0030321,FBgn0031516,FBgn0032026,FBgn0032167,FBgn0039207,FBgn0051793,FBgn0261609,FBgn0263316,FBgn0263740,FBgn0264494	regulation of cell differentiation	GO:0045595	1.44251e-08	FBgn0000017,FBgn0000273,FBgn0000308,FBgn0000490,FBgn0000546,FBgn0001122,FBgn0001138,FBgn0001235,FBgn0003997,FBgn0004102,FBgn0004117,FBgn0004242,FBgn0004395,FBgn0004435,FBgn0004569,FBgn0004595,FBgn0004876,FBgn0010113,FBgn0010300,FBgn0010473,FBgn0011259,FBgn0011760,FBgn0011766,FBgn0013343,FBgn0015609,FBgn0015774,FBgn0020269,FBgn0023215,FBgn0026375,FBgn0028369,FBgn0028582,FBgn0040505,FBgn0063485,FBg…	U2 snRNP	GO:0005686	0.0422333	FBgn0003920,FBgn0003922,FBgn0003923,FBgn0004191,FBgn0004192,FBgn0036734,FBgn0041720	small protein activating enzyme activity	GO:0008641	0.017444	FBgn0000253,FBgn0000276,FBgn0000546,FBgn0003209,FBgn0003997,FBgn0004910,FBgn0010113,FBgn0011760,FBgn0027932,FBgn0035497,FBgn0035542,FBgn0039685,FBgn0259176,FBgn0261793
single-organism process	GO:0044699	8.42434e-05	FBgn0000052,FBgn0000053,FBgn0000055,FBgn0000056,FBgn0000100,FBgn0000150,FBgn0000239,FBgn0000330,FBgn0000406,FBgn0000447,FBgn0000477,FBgn0000504,FBgn0000536,FBgn0000565,FBgn0000566,FBgn0000592,FBgn0000615,FBgn0000964,FBgn0000996,FBgn0001092,FBgn0001114,FBgn0001124,FBgn0001125,FBgn0001187,FBgn0001208,FBgn0001220,FBgn0001223,FBgn0001248,FBgn0001258,FBgn0002022,FBgn0002069,FBgn0002565,FBgn0002590,FBg…													Starch and sucrose metabolism	500	0.0308904	FBgn0001187,FBgn0003074,FBgn0003076,FBgn0003748,FBgn0027073,FBgn0027560,FBgn0031907,FBgn0032684,FBgn0034605,FBgn0034618,FBgn0035978,FBgn0038083,FBgn0040091,FBgn0040256,FBgn0053138,FBgn0261575	modulation of chemical synaptic transmission	GO:0050804	1.49481e-08	FBgn0000273,FBgn0003165,FBgn0003380,FBgn0004242,FBgn0004244,FBgn0004435,FBgn0005586,FBgn0011288,FBgn0013334,FBgn0013759,FBgn0028400,FBgn0030505,FBgn0030897,FBgn0034072,FBgn0040505,FBgn0041605,FBgn0053547,FBgn0083228,FBgn0083963,FBgn0086677,FBgn0259246,FBgn0260499,FBgn0263397,FBgn0264006	A band	GO:0031672	0.0436284	FBgn0005666,FBgn0038294,FBgn0052311,FBgn0063485,FBgn0265487	steroid hormone receptor activity	GO:0003707	0.0202725	FBgn0000448,FBgn0000546,FBgn0000568,FBgn0001078,FBgn0004865
protein targeting to ER	GO:0045047	8.74127e-05	FBgn0010391,FBgn0010638,FBgn0010747,FBgn0025700,FBgn0030306,FBgn0035771,FBgn0035947,FBgn0036300,FBgn0038810,FBgn0039172													Peroxisome	4146	0.0353322	FBgn0001248,FBgn0003308,FBgn0014031,FBgn0015808,FBgn0027572,FBgn0030731,FBgn0031282,FBgn0031703,FBgn0031860,FBgn0033543,FBgn0033564,FBgn0034488,FBgn0034628,FBgn0034629,FBgn0037440,FBgn0061356,FBgn0263120	neurological system process	GO:0050877	2.99897e-08	FBgn0000017,FBgn0000108,FBgn0000253,FBgn0000273,FBgn0000479,FBgn0000535,FBgn0000546,FBgn0000636,FBgn0001122,FBgn0002921,FBgn0003165,FBgn0003218,FBgn0003380,FBgn0004168,FBgn0004198,FBgn0004244,FBgn0004370,FBgn0004435,FBgn0004516,FBgn0004575,FBgn0004595,FBgn0004618,FBgn0004635,FBgn0005614,FBgn0010415,FBgn0011259,FBgn0011582,FBgn0013334,FBgn0013576,FBgn0013759,FBgn0013995,FBgn0015777,FBgn0017590,FBg…	occluding junction	GO:0070160	0.0479273	FBgn0000636,FBgn0002921,FBgn0010238,FBgn0015777,FBgn0037240,FBgn0264975,FBgn0266409	protein tyrosine phosphatase activity	GO:0004725	0.0219575	FBgn0004369,FBgn0004370,FBgn0024734,FBgn0028341,FBgn0030976,FBgn0031294,FBgn0243512,FBgn0267487
ncRNA metabolic process	GO:0034660	8.82447e-05	FBgn0002069,FBgn0003062,FBgn0003517,FBgn0005593,FBgn0005674,FBgn0011824,FBgn0014026,FBgn0015393,FBgn0015521,FBgn0021765,FBgn0025366,FBgn0026079,FBgn0026196,FBgn0027079,FBgn0027080,FBgn0027081,FBgn0027084,FBgn0027086,FBgn0027087,FBgn0027088,FBgn0027090,FBgn0027091,FBgn0027093,FBgn0027094,FBgn0027579,FBgn0028426,FBgn0028744,FBgn0029148,FBgn0029714,FBgn0029785,FBgn0030177,FBgn0030720,FBgn0031497,FBg…													Histidine, lysine, phenylalanine, tyrosine, proline and tryptophan catabolism	R-DME-6788656	0.0392168	FBgn0001208,FBgn0003965,FBgn0025687,FBgn0028425,FBgn0030653,FBgn0031824,FBgn0035964,FBgn0036007,FBgn0036857,FBgn0037533,FBgn0037955,FBgn0040383,FBgn0053092	regulation of cellular biosynthetic process	GO:0031326	4.26365e-08	FBgn0000179,FBgn0000273,FBgn0000289,FBgn0000439,FBgn0000448,FBgn0000490,FBgn0000546,FBgn0000568,FBgn0000659,FBgn0000810,FBgn0001078,FBgn0001122,FBgn0001138,FBgn0001139,FBgn0001235,FBgn0001323,FBgn0001994,FBgn0002521,FBgn0002723,FBgn0003165,FBgn0003463,FBgn0003896,FBgn0004102,FBgn0004168,FBgn0004198,FBgn0004435,FBgn0004595,FBgn0004618,FBgn0004795,FBgn0004838,FBgn0004865,FBgn0004880,FBgn0010300,FBg…					substrate-specific transmembrane transporter activity	GO:0022891	0.0234049	FBgn0000038,FBgn0000253,FBgn0000535,FBgn0002921,FBgn0003218,FBgn0003380,FBgn0003386,FBgn0004244,FBgn0005614,FBgn0013673,FBgn0013995,FBgn0015558,FBgn0015777,FBgn0015872,FBgn0027556,FBgn0028704,FBgn0028875,FBgn0029663,FBgn0029761,FBgn0029762,FBgn0030745,FBgn0031424,FBgn0032151,FBgn0034497,FBgn0035505,FBgn0039561,FBgn0040697,FBgn0051100,FBgn0053181,FBgn0053988,FBgn0085426,FBgn0086778,FBgn0259918,FBg…
pyridine-containing compound metabolic process	GO:0072524	0.000100213	FBgn0001092,FBgn0001187,FBgn0003074,FBgn0004057,FBgn0004654,FBgn0022160,FBgn0023477,FBgn0027621,FBgn0030239,FBgn0033373,FBgn0035436,FBgn0050499,FBgn0051472,FBgn0086355,FBgn0250906,FBgn0262782,FBgn0267408													Ascorbate and aldarate metabolism	53	0.0393832	FBgn0012036,FBgn0027073,FBgn0032684,FBgn0034605,FBgn0036262,FBgn0036857,FBgn0038083,FBgn0040091,FBgn0040256,FBgn0051075	cell-cell adhesion	GO:0098609	4.61041e-08	FBgn0000636,FBgn0001138,FBgn0001404,FBgn0003285,FBgn0004569,FBgn0004635,FBgn0005775,FBgn0010238,FBgn0010473,FBgn0015229,FBgn0015609,FBgn0017590,FBgn0024189,FBgn0028369,FBgn0029082,FBgn0036844,FBgn0038498,FBgn0039584,FBgn0053179,FBgn0083963,FBgn0259745,FBgn0260799,FBgn0261822,FBgn0264975,FBgn0265296					channel regulator activity	GO:0016247	0.0265269	FBgn0027556,FBgn0035505,FBgn0040697,FBgn0259918,FBgn0260812
macromolecular complex assembly	GO:0065003	0.000134608	FBgn0000100,FBgn0000565,FBgn0002590,FBgn0002622,FBgn0002626,FBgn0003274,FBgn0003279,FBgn0003517,FBgn0003941,FBgn0003942,FBgn0003965,FBgn0004403,FBgn0004867,FBgn0004926,FBgn0005533,FBgn0005593,FBgn0010198,FBgn0010225,FBgn0010265,FBgn0010391,FBgn0010408,FBgn0010411,FBgn0010747,FBgn0011272,FBgn0011284,FBgn0013325,FBgn0014026,FBgn0015268,FBgn0015288,FBgn0015521,FBgn0015756,FBgn0015834,FBgn0016726,FBg…													Lysine degradation	310	0.0393832	FBgn0012036,FBgn0025687,FBgn0028479,FBgn0029969,FBgn0030575,FBgn0031824,FBgn0036147,FBgn0036857,FBgn0038795,FBgn0051075	regulation of biosynthetic process	GO:0009889	4.70188e-08	FBgn0000179,FBgn0000273,FBgn0000289,FBgn0000439,FBgn0000448,FBgn0000490,FBgn0000546,FBgn0000568,FBgn0000659,FBgn0000810,FBgn0001078,FBgn0001122,FBgn0001138,FBgn0001139,FBgn0001235,FBgn0001323,FBgn0001994,FBgn0002521,FBgn0002723,FBgn0003165,FBgn0003463,FBgn0003896,FBgn0004102,FBgn0004168,FBgn0004198,FBgn0004435,FBgn0004595,FBgn0004618,FBgn0004795,FBgn0004838,FBgn0004865,FBgn0004880,FBgn0010300,FBg…					voltage-gated ion channel activity	GO:0005244	0.0289388	FBgn0000535,FBgn0003380,FBgn0003386,FBgn0085426,FBgn0260499,FBgn0261612,FBgn0263257,FBgn0263397
carbohydrate catabolic process	GO:0016052	0.000135836	FBgn0001092,FBgn0001187,FBgn0003074,FBgn0003076,FBgn0003748,FBgn0027621,FBgn0033735,FBgn0034110,FBgn0034618,FBgn0035679,FBgn0035850,FBgn0036262,FBgn0043783,FBgn0044452,FBgn0086355,FBgn0250906,FBgn0263200													Fructose biosynthesis	R-DME-5652227	0.0395066	FBgn0022359,FBgn0024289,FBgn0086254	regulation of primary metabolic process	GO:0080090	4.75894e-08	FBgn0000017,FBgn0000179,FBgn0000259,FBgn0000273,FBgn0000289,FBgn0000439,FBgn0000448,FBgn0000490,FBgn0000546,FBgn0000568,FBgn0000659,FBgn0000810,FBgn0001078,FBgn0001122,FBgn0001138,FBgn0001139,FBgn0001235,FBgn0001323,FBgn0001994,FBgn0002521,FBgn0002723,FBgn0003165,FBgn0003209,FBgn0003463,FBgn0003896,FBgn0003997,FBgn0004102,FBgn0004168,FBgn0004198,FBgn0004369,FBgn0004435,FBgn0004595,FBgn0004618,FBg…					voltage-gated channel activity	GO:0022832	0.0289388	FBgn0000535,FBgn0003380,FBgn0003386,FBgn0085426,FBgn0260499,FBgn0261612,FBgn0263257,FBgn0263397
cellular lipid metabolic process	GO:0044255	0.000142333	FBgn0000536,FBgn0001248,FBgn0003308,FBgn0003656,FBgn0004797,FBgn0010516,FBgn0010591,FBgn0010611,FBgn0020236,FBgn0021765,FBgn0025592,FBgn0025615,FBgn0026576,FBgn0027348,FBgn0027572,FBgn0027579,FBgn0028479,FBgn0028519,FBgn0029906,FBgn0029969,FBgn0030607,FBgn0030731,FBgn0030737,FBgn0032161,FBgn0032162,FBgn0032394,FBgn0033187,FBgn0033246,FBgn0033949,FBgn0034488,FBgn0034628,FBgn0034629,FBgn0034997,FBg…													Urea cycle	R-DME-70635	0.0395066	FBgn0023535,FBgn0030218,FBgn0032076	regulation of cellular metabolic process	GO:0031323	5.18415e-08	FBgn0000017,FBgn0000179,FBgn0000259,FBgn0000273,FBgn0000289,FBgn0000439,FBgn0000448,FBgn0000490,FBgn0000546,FBgn0000568,FBgn0000659,FBgn0000810,FBgn0001078,FBgn0001122,FBgn0001138,FBgn0001139,FBgn0001235,FBgn0001323,FBgn0001994,FBgn0002521,FBgn0002723,FBgn0003165,FBgn0003209,FBgn0003463,FBgn0003896,FBgn0003997,FBgn0004102,FBgn0004168,FBgn0004198,FBgn0004369,FBgn0004435,FBgn0004595,FBgn0004618,FBg…					ubiquitin-like protein ligase activity	GO:0061659	0.0305237	FBgn0000253,FBgn0000276,FBgn0000546,FBgn0003209,FBgn0003997,FBgn0004910,FBgn0004919,FBgn0010113,FBgn0011760,FBgn0027932,FBgn0031857,FBgn0035497,FBgn0035542,FBgn0039685,FBgn0052369,FBgn0052850,FBgn0259176,FBgn0261793,FBgn0264848
establishment of protein localization to endoplasmic reticulum	GO:0072599	0.000158475	FBgn0010391,FBgn0010638,FBgn0010747,FBgn0025700,FBgn0030306,FBgn0035771,FBgn0035947,FBgn0036300,FBgn0038810,FBgn0039172													Ethanol oxidation	R-DME-71384	0.0395066	FBgn0011768,FBgn0012034,FBgn0012036	response to chemical	GO:0042221	5.42792e-08	FBgn0000017,FBgn0000253,FBgn0000273,FBgn0000308,FBgn0000448,FBgn0000479,FBgn0000490,FBgn0000535,FBgn0000546,FBgn0000568,FBgn0000636,FBgn0000659,FBgn0001078,FBgn0001138,FBgn0001404,FBgn0002306,FBgn0002723,FBgn0002868,FBgn0003165,FBgn0003380,FBgn0003435,FBgn0003463,FBgn0003896,FBgn0003997,FBgn0004108,FBgn0004198,FBgn0004244,FBgn0004369,FBgn0004370,FBgn0004435,FBgn0004516,FBgn0004575,FBgn0004595,FBg…					neurotransmitter transporter activity	GO:0005326	0.0307118	FBgn0029663,FBgn0029762,FBgn0031424,FBgn0041605,FBgn0262476,FBgn0270928
maturation of LSU-rRNA	GO:0000470	0.000158788	FBgn0005593,FBgn0014026,FBgn0015393,FBgn0025366,FBgn0028744,FBgn0029148,FBgn0029785,FBgn0032050,FBgn0032404,FBgn0033741,FBgn0036213													VLDL assembly	R-DME-8866423	0.0395066	FBgn0014002,FBgn0087002,FBgn0266369	tissue morphogenesis	GO:0048729	6.10975e-08	FBgn0000017,FBgn0000179,FBgn0000273,FBgn0000289,FBgn0000308,FBgn0000489,FBgn0000490,FBgn0000546,FBgn0000633,FBgn0000659,FBgn0001078,FBgn0001122,FBgn0001235,FBgn0001404,FBgn0003209,FBgn0003463,FBgn0003896,FBgn0003997,FBgn0004102,FBgn0004198,FBgn0004395,FBgn0004569,FBgn0004635,FBgn0004919,FBgn0010113,FBgn0010238,FBgn0010313,FBgn0010825,FBgn0011224,FBgn0011760,FBgn0011817,FBgn0014010,FBgn0014135,FBg…					monovalent inorganic cation transmembrane transporter activity	GO:0015077	0.0344576	FBgn0000535,FBgn0002921,FBgn0003380,FBgn0003386,FBgn0013673,FBgn0013995,FBgn0015777,FBgn0027556,FBgn0028704,FBgn0029663,FBgn0029761,FBgn0029762,FBgn0030745,FBgn0035505,FBgn0040697,FBgn0260499,FBgn0261612,FBgn0262476,FBgn0262736,FBgn0263257,FBgn0263397
cellular nitrogen compound biosynthetic process	GO:0044271	0.000174692	FBgn0000052,FBgn0000053,FBgn0000100,FBgn0000150,FBgn0000239,FBgn0000447,FBgn0000504,FBgn0000559,FBgn0000566,FBgn0000964,FBgn0000996,FBgn0002069,FBgn0002590,FBgn0002622,FBgn0002626,FBgn0002905,FBgn0003068,FBgn0003189,FBgn0003204,FBgn0003274,FBgn0003279,FBgn0003507,FBgn0003517,FBgn0003867,FBgn0003941,FBgn0003942,FBgn0004403,FBgn0004852,FBgn0004867,FBgn0004926,FBgn0005533,FBgn0005593,FBgn0005655,FBg…													Chylomicron assembly	R-DME-8963888	0.0395066	FBgn0014002,FBgn0087002,FBgn0266369	positive regulation of biological process	GO:0048518	6.64146e-08	FBgn0000017,FBgn0000044,FBgn0000253,FBgn0000273,FBgn0000308,FBgn0000439,FBgn0000448,FBgn0000490,FBgn0000546,FBgn0000659,FBgn0001078,FBgn0001138,FBgn0001235,FBgn0002521,FBgn0002723,FBgn0003165,FBgn0003380,FBgn0003463,FBgn0003475,FBgn0003896,FBgn0003997,FBgn0004102,FBgn0004117,FBgn0004240,FBgn0004242,FBgn0004569,FBgn0004595,FBgn0004618,FBgn0004635,FBgn0004795,FBgn0004838,FBgn0010388,FBgn0010415,FBg…					poly-pyrimidine tract binding	GO:0008187	0.0356298	FBgn0086675,FBgn0260400,FBgn0260943,FBgn0264270
organic substance catabolic process	GO:1901575	0.000256304	FBgn0000055,FBgn0000477,FBgn0001092,FBgn0001125,FBgn0001187,FBgn0001208,FBgn0001248,FBgn0002284,FBgn0003074,FBgn0003076,FBgn0003116,FBgn0003308,FBgn0003748,FBgn0003941,FBgn0003965,FBgn0010516,FBgn0010591,FBgn0013763,FBgn0014031,FBgn0014455,FBgn0016697,FBgn0023535,FBgn0024314,FBgn0027572,FBgn0027621,FBgn0027945,FBgn0028479,FBgn0028686,FBgn0028689,FBgn0028693,FBgn0028978,FBgn0029689,FBgn0029969,FBg…													Plasma lipoprotein assembly	R-DME-8963898	0.0395066	FBgn0014002,FBgn0087002,FBgn0266369	developmental growth	GO:0048589	6.6926e-08	FBgn0000017,FBgn0000179,FBgn0000273,FBgn0000308,FBgn0000479,FBgn0000490,FBgn0000535,FBgn0000659,FBgn0001122,FBgn0002921,FBgn0003165,FBgn0003209,FBgn0003380,FBgn0003997,FBgn0004575,FBgn0010113,FBgn0010300,FBgn0010415,FBgn0011817,FBgn0013759,FBgn0014010,FBgn0015609,FBgn0020386,FBgn0026077,FBgn0032840,FBgn0034072,FBgn0034720,FBgn0034789,FBgn0036494,FBgn0038063,FBgn0038980,FBgn0039532,FBgn0040752,FBg…					receptor regulator activity	GO:0030545	0.0356298	FBgn0004569,FBgn0015399,FBgn0035092,FBgn0086677
cellular aldehyde metabolic process	GO:0006081	0.000337343	FBgn0000055,FBgn0001248,FBgn0004654,FBgn0011770,FBgn0012036,FBgn0014031,FBgn0023477,FBgn0030239,FBgn0050499,FBgn0051472,FBgn0086355,FBgn0267408													Triglyceride biosynthesis	R-DME-75109	0.0466999	FBgn0004797,FBgn0025592,FBgn0027579,FBgn0035266,FBgn0263593	single-organism process	GO:0044699	6.72363e-08	FBgn0000017,FBgn0000038,FBgn0000044,FBgn0000108,FBgn0000179,FBgn0000253,FBgn0000259,FBgn0000273,FBgn0000276,FBgn0000289,FBgn0000308,FBgn0000439,FBgn0000448,FBgn0000479,FBgn0000489,FBgn0000490,FBgn0000535,FBgn0000546,FBgn0000568,FBgn0000633,FBgn0000636,FBgn0000659,FBgn0000810,FBgn0001078,FBgn0001122,FBgn0001138,FBgn0001139,FBgn0001142,FBgn0001186,FBgn0001235,FBgn0001323,FBgn0001404,FBgn0001994,FBg…					protein complex binding	GO:0032403	0.0385174	FBgn0000490,FBgn0001122,FBgn0003463,FBgn0004117,FBgn0004397,FBgn0004435,FBgn0005666,FBgn0024238,FBgn0032414,FBgn0033865,FBgn0063670,FBgn0085409,FBgn0261836,FBgn0265935
aspartate family amino acid catabolic process	GO:0009068	0.000338743	FBgn0001125,FBgn0029689,FBgn0030653,FBgn0031824,FBgn0036208,FBgn0039094																	positive regulation of cellular process	GO:0048522	7.30147e-08	FBgn0000017,FBgn0000308,FBgn0000439,FBgn0000448,FBgn0000490,FBgn0000546,FBgn0000659,FBgn0001078,FBgn0001138,FBgn0001235,FBgn0002521,FBgn0002723,FBgn0003165,FBgn0003463,FBgn0003475,FBgn0003896,FBgn0003997,FBgn0004102,FBgn0004117,FBgn0004242,FBgn0004569,FBgn0004595,FBgn0004618,FBgn0004635,FBgn0004795,FBgn0004838,FBgn0010388,FBgn0010415,FBgn0011481,FBgn0011582,FBgn0011760,FBgn0011766,FBgn0011817,FBg…					neurotransmitter binding	GO:0042165	0.0394283	FBgn0000038,FBgn0004168,FBgn0004244,FBgn0011582,FBgn0028875,FBgn0032151,FBgn0086778,FBgn0266347,FBgn0270928
rRNA metabolic process	GO:0016072	0.000344028	FBgn0003062,FBgn0003517,FBgn0005593,FBgn0011824,FBgn0014026,FBgn0015393,FBgn0015521,FBgn0025366,FBgn0026196,FBgn0028744,FBgn0029148,FBgn0029714,FBgn0029785,FBgn0030177,FBgn0030720,FBgn0032050,FBgn0032404,FBgn0033454,FBgn0033741,FBgn0034743,FBgn0036213,FBgn0036686,FBgn0036916,FBgn0037073,FBgn0037137,FBgn0037529,FBgn0038146,FBgn0038964,FBgn0039713,FBgn0086451,FBgn0261592																	post-embryonic development	GO:0009791	9.05017e-08	FBgn0000179,FBgn0000253,FBgn0000273,FBgn0000276,FBgn0000289,FBgn0000308,FBgn0000489,FBgn0000490,FBgn0000546,FBgn0000568,FBgn0000659,FBgn0001078,FBgn0001122,FBgn0001235,FBgn0001994,FBgn0002306,FBgn0003209,FBgn0003463,FBgn0003997,FBgn0004102,FBgn0004198,FBgn0004395,FBgn0004569,FBgn0004635,FBgn0004910,FBgn0010113,FBgn0010313,FBgn0010825,FBgn0011224,FBgn0011760,FBgn0011766,FBgn0011817,FBgn0014010,FBg…					neurotransmitter receptor activity	GO:0030594	0.0440405	FBgn0000038,FBgn0004168,FBgn0004244,FBgn0011582,FBgn0028875,FBgn0032151,FBgn0086778,FBgn0260499,FBgn0266347
cellular catabolic process	GO:0044248	0.000398819	FBgn0000477,FBgn0000565,FBgn0001125,FBgn0001208,FBgn0001220,FBgn0001248,FBgn0002284,FBgn0003116,FBgn0003308,FBgn0003507,FBgn0003748,FBgn0003941,FBgn0003965,FBgn0010516,FBgn0010591,FBgn0010638,FBgn0013269,FBgn0014031,FBgn0014455,FBgn0016697,FBgn0023535,FBgn0024314,FBgn0025454,FBgn0027572,FBgn0027945,FBgn0028479,FBgn0028686,FBgn0028689,FBgn0028693,FBgn0028978,FBgn0029176,FBgn0029689,FBgn0029969,FBg…																	locomotory behavior	GO:0007626	1.30421e-07	FBgn0000259,FBgn0000273,FBgn0000479,FBgn0000535,FBgn0000546,FBgn0002921,FBgn0003380,FBgn0003423,FBgn0004102,FBgn0004242,FBgn0004435,FBgn0004516,FBgn0005626,FBgn0010473,FBgn0011259,FBgn0013759,FBgn0022382,FBgn0023178,FBgn0026086,FBgn0027109,FBgn0035023,FBgn0037976,FBgn0038839,FBgn0052423,FBgn0053988,FBgn0085387,FBgn0086778,FBgn0259246,FBgn0262738,FBgn0263391,FBgn0263397,FBgn0264006,FBgn0265784,FBg…
serine family amino acid biosynthetic process	GO:0009070	0.000424575	FBgn0000566,FBgn0014031,FBgn0014427,FBgn0023129,FBgn0029823,FBgn0032224,FBgn0039094																	negative regulation of cell communication	GO:0010648	1.87003e-07	FBgn0000253,FBgn0000273,FBgn0001139,FBgn0003165,FBgn0003209,FBgn0003463,FBgn0004168,FBgn0004198,FBgn0004244,FBgn0004435,FBgn0004569,FBgn0004876,FBgn0010825,FBgn0011817,FBgn0015024,FBgn0015399,FBgn0015400,FBgn0027932,FBgn0029791,FBgn0029939,FBgn0030505,FBgn0033438,FBgn0035719,FBgn0036165,FBgn0036844,FBgn0039273,FBgn0040271,FBgn0040505,FBgn0041094,FBgn0041605,FBgn0085432,FBgn0085450,FBgn0086677,FBg…
single-organism carbohydrate catabolic process	GO:0044724	0.000438517	FBgn0001092,FBgn0001187,FBgn0003074,FBgn0003076,FBgn0003748,FBgn0027621,FBgn0034110,FBgn0034618,FBgn0035679,FBgn0035850,FBgn0036262,FBgn0043783,FBgn0044452,FBgn0086355,FBgn0250906,FBgn0263200																	negative regulation of signaling	GO:0023057	1.87003e-07	FBgn0000253,FBgn0000273,FBgn0001139,FBgn0003165,FBgn0003209,FBgn0003463,FBgn0004168,FBgn0004198,FBgn0004244,FBgn0004435,FBgn0004569,FBgn0004876,FBgn0010825,FBgn0011817,FBgn0015024,FBgn0015399,FBgn0015400,FBgn0027932,FBgn0029791,FBgn0029939,FBgn0030505,FBgn0033438,FBgn0035719,FBgn0036165,FBgn0036844,FBgn0039273,FBgn0040271,FBgn0040505,FBgn0041094,FBgn0041605,FBgn0085432,FBgn0085450,FBgn0086677,FBg…
single-organism carbohydrate metabolic process	GO:0044723	0.000447986	FBgn0001092,FBgn0001187,FBgn0001248,FBgn0003067,FBgn0003074,FBgn0003076,FBgn0003507,FBgn0003731,FBgn0003748,FBgn0004057,FBgn0004654,FBgn0010217,FBgn0019957,FBgn0020236,FBgn0020251,FBgn0020306,FBgn0021872,FBgn0022160,FBgn0025592,FBgn0027550,FBgn0027560,FBgn0027580,FBgn0027611,FBgn0027621,FBgn0031907,FBgn0032253,FBgn0032820,FBgn0032940,FBgn0033246,FBgn0034110,FBgn0034356,FBgn0034618,FBgn0035147,FBg…																	adult behavior	GO:0030534	1.87422e-07	FBgn0000273,FBgn0000479,FBgn0000535,FBgn0002921,FBgn0003165,FBgn0003380,FBgn0003435,FBgn0004102,FBgn0004435,FBgn0004575,FBgn0004635,FBgn0005626,FBgn0010473,FBgn0013759,FBgn0017590,FBgn0022382,FBgn0026086,FBgn0027932,FBgn0031453,FBgn0032840,FBgn0037976,FBgn0039298,FBgn0052423,FBgn0053207,FBgn0085387,FBgn0086778,FBgn0259246,FBgn0262738
pyridine nucleotide metabolic process	GO:0019362	0.000478824	FBgn0001092,FBgn0001187,FBgn0003074,FBgn0004057,FBgn0004654,FBgn0022160,FBgn0023477,FBgn0027621,FBgn0030239,FBgn0033373,FBgn0035436,FBgn0050499,FBgn0086355,FBgn0250906,FBgn0262782																	metamorphosis	GO:0007552	1.91039e-07	FBgn0000179,FBgn0000253,FBgn0000273,FBgn0000276,FBgn0000289,FBgn0000308,FBgn0000448,FBgn0000489,FBgn0000490,FBgn0000546,FBgn0000659,FBgn0001078,FBgn0001122,FBgn0001235,FBgn0003209,FBgn0003463,FBgn0003997,FBgn0004102,FBgn0004198,FBgn0004395,FBgn0004569,FBgn0004635,FBgn0004910,FBgn0010113,FBgn0010313,FBgn0010825,FBgn0011224,FBgn0011760,FBgn0011817,FBgn0014010,FBgn0016977,FBgn0020521,FBgn0024244,FBg…
nicotinamide nucleotide metabolic process	GO:0046496	0.000478824	FBgn0001092,FBgn0001187,FBgn0003074,FBgn0004057,FBgn0004654,FBgn0022160,FBgn0023477,FBgn0027621,FBgn0030239,FBgn0033373,FBgn0035436,FBgn0050499,FBgn0086355,FBgn0250906,FBgn0262782																	instar larval or pupal morphogenesis	GO:0048707	1.95407e-07	FBgn0000179,FBgn0000253,FBgn0000273,FBgn0000276,FBgn0000289,FBgn0000308,FBgn0000489,FBgn0000490,FBgn0000546,FBgn0000659,FBgn0001078,FBgn0001122,FBgn0001235,FBgn0003209,FBgn0003463,FBgn0003997,FBgn0004102,FBgn0004198,FBgn0004395,FBgn0004569,FBgn0004635,FBgn0004910,FBgn0010113,FBgn0010313,FBgn0010825,FBgn0011224,FBgn0011760,FBgn0011817,FBgn0014010,FBgn0016977,FBgn0020521,FBgn0024244,FBgn0026411,FBg…
triglyceride homeostasis	GO:0070328	0.000608318	FBgn0011205,FBgn0025615,FBgn0028519,FBgn0032940,FBgn0034140,FBgn0035632,FBgn0036046,FBgn0036449,FBgn0038074,FBgn0038984,FBgn0086687																	post-embryonic animal morphogenesis	GO:0009886	1.97582e-07	FBgn0000179,FBgn0000253,FBgn0000273,FBgn0000276,FBgn0000289,FBgn0000308,FBgn0000489,FBgn0000490,FBgn0000546,FBgn0000659,FBgn0001078,FBgn0001122,FBgn0001235,FBgn0003209,FBgn0003463,FBgn0003997,FBgn0004102,FBgn0004198,FBgn0004395,FBgn0004569,FBgn0004635,FBgn0004910,FBgn0010113,FBgn0010313,FBgn0010825,FBgn0011224,FBgn0011760,FBgn0011817,FBgn0014010,FBgn0016977,FBgn0020521,FBgn0024244,FBgn0026084,FBg…
methionine metabolic process	GO:0006555	0.000689148	FBgn0000566,FBgn0014455,FBgn0030518,FBgn0032727,FBgn0034276,FBgn0036157,FBgn0038074,FBgn0052068																	growth	GO:0040007	2.08606e-07	FBgn0000017,FBgn0000179,FBgn0000273,FBgn0000308,FBgn0000479,FBgn0000490,FBgn0000535,FBgn0000546,FBgn0000659,FBgn0001122,FBgn0002921,FBgn0003165,FBgn0003209,FBgn0003380,FBgn0003997,FBgn0004575,FBgn0010113,FBgn0010300,FBgn0010415,FBgn0011817,FBgn0013759,FBgn0014010,FBgn0015609,FBgn0020386,FBgn0023215,FBgn0026077,FBgn0032840,FBgn0034072,FBgn0034720,FBgn0034789,FBgn0036165,FBgn0036494,FBgn0038063,FBg…
cotranslational protein targeting to membrane	GO:0006613	0.000689148	FBgn0010391,FBgn0010638,FBgn0010747,FBgn0011016,FBgn0025700,FBgn0028327,FBgn0035947,FBgn0038810																	regulation of nucleobase-containing compound metabolic process	GO:0019219	2.42198e-07	FBgn0000179,FBgn0000273,FBgn0000289,FBgn0000439,FBgn0000448,FBgn0000490,FBgn0000546,FBgn0000568,FBgn0000659,FBgn0001078,FBgn0001122,FBgn0001138,FBgn0001139,FBgn0001235,FBgn0001323,FBgn0001994,FBgn0002521,FBgn0002723,FBgn0003165,FBgn0003463,FBgn0003896,FBgn0004102,FBgn0004168,FBgn0004198,FBgn0004435,FBgn0004595,FBgn0004618,FBgn0004795,FBgn0004838,FBgn0004865,FBgn0004880,FBgn0010313,FBgn0010825,FBg…
fatty acid beta-oxidation	GO:0006635	0.000695977	FBgn0010516,FBgn0027572,FBgn0028479,FBgn0029969,FBgn0030731,FBgn0032161,FBgn0032162,FBgn0034628,FBgn0034629,FBgn0037440,FBgn0040064,FBgn0040349																	circadian rhythm	GO:0007623	2.44726e-07	FBgn0000259,FBgn0000273,FBgn0000479,FBgn0000546,FBgn0003380,FBgn0003997,FBgn0004168,FBgn0004244,FBgn0004618,FBgn0022382,FBgn0023178,FBgn0026086,FBgn0027109,FBgn0032048,FBgn0032840,FBgn0035023,FBgn0039298,FBgn0040382,FBgn0053988,FBgn0259168,FBgn0260499,FBgn0262738,FBgn0263397,FBgn0264006,FBgn0265784
sulfur amino acid metabolic process	GO:0000096	0.000762118	FBgn0000565,FBgn0000566,FBgn0014455,FBgn0030518,FBgn0032727,FBgn0034276,FBgn0036157,FBgn0038074,FBgn0052068																	single-organism cellular process	GO:0044763	2.6924e-07	FBgn0000017,FBgn0000038,FBgn0000044,FBgn0000108,FBgn0000253,FBgn0000259,FBgn0000273,FBgn0000276,FBgn0000308,FBgn0000439,FBgn0000479,FBgn0000490,FBgn0000535,FBgn0000546,FBgn0000568,FBgn0000633,FBgn0000636,FBgn0000659,FBgn0000810,FBgn0001078,FBgn0001122,FBgn0001138,FBgn0001139,FBgn0001142,FBgn0001186,FBgn0001235,FBgn0001323,FBgn0001404,FBgn0002306,FBgn0002521,FBgn0002723,FBgn0002773,FBgn0002921,FBg…
acylglycerol homeostasis	GO:0055090	0.000892849	FBgn0011205,FBgn0025615,FBgn0028519,FBgn0032940,FBgn0034140,FBgn0035632,FBgn0036046,FBgn0036449,FBgn0038074,FBgn0038984,FBgn0086687																	morphogenesis of an epithelium	GO:0002009	2.76601e-07	FBgn0000017,FBgn0000179,FBgn0000273,FBgn0000289,FBgn0000308,FBgn0000489,FBgn0000490,FBgn0000546,FBgn0000633,FBgn0000659,FBgn0001078,FBgn0001122,FBgn0001235,FBgn0001404,FBgn0003209,FBgn0003463,FBgn0003896,FBgn0003997,FBgn0004102,FBgn0004198,FBgn0004395,FBgn0004569,FBgn0004635,FBgn0010113,FBgn0010238,FBgn0010313,FBgn0010825,FBgn0011224,FBgn0011760,FBgn0011817,FBgn0014010,FBgn0014135,FBgn0015609,FBg…
glycine metabolic process	GO:0006544	0.00105461	FBgn0014031,FBgn0027945,FBgn0029823,FBgn0032287,FBgn0037801,FBgn0039094																	regulation of metabolic process	GO:0019222	2.76612e-07	FBgn0000017,FBgn0000179,FBgn0000259,FBgn0000273,FBgn0000289,FBgn0000439,FBgn0000448,FBgn0000490,FBgn0000546,FBgn0000568,FBgn0000659,FBgn0000810,FBgn0001078,FBgn0001122,FBgn0001138,FBgn0001139,FBgn0001235,FBgn0001323,FBgn0001994,FBgn0002521,FBgn0002723,FBgn0003165,FBgn0003209,FBgn0003463,FBgn0003896,FBgn0003997,FBgn0004102,FBgn0004168,FBgn0004198,FBgn0004369,FBgn0004435,FBgn0004595,FBgn0004618,FBg…
folic acid-containing compound metabolic process	GO:0006760	0.00105461	FBgn0010222,FBgn0020385,FBgn0029823,FBgn0030407,FBgn0032945,FBgn0085453																	rhythmic process	GO:0048511	3.20259e-07	FBgn0000259,FBgn0000273,FBgn0000479,FBgn0000546,FBgn0003380,FBgn0003997,FBgn0004168,FBgn0004244,FBgn0004618,FBgn0022382,FBgn0023178,FBgn0026086,FBgn0027109,FBgn0032048,FBgn0032840,FBgn0035023,FBgn0039298,FBgn0040382,FBgn0053988,FBgn0259168,FBgn0260499,FBgn0262738,FBgn0263397,FBgn0264006,FBgn0265784
cellular nitrogen compound metabolic process	GO:0034641	0.00106115	FBgn0000052,FBgn0000053,FBgn0000100,FBgn0000150,FBgn0000239,FBgn0000447,FBgn0000477,FBgn0000504,FBgn0000559,FBgn0000566,FBgn0000615,FBgn0000964,FBgn0000996,FBgn0001092,FBgn0001187,FBgn0002022,FBgn0002069,FBgn0002590,FBgn0002622,FBgn0002626,FBgn0002905,FBgn0003062,FBgn0003068,FBgn0003074,FBgn0003116,FBgn0003189,FBgn0003204,FBgn0003274,FBgn0003279,FBgn0003308,FBgn0003507,FBgn0003517,FBgn0003867,FBg…																	regulation of nitrogen compound metabolic process	GO:0051171	3.78735e-07	FBgn0000179,FBgn0000259,FBgn0000273,FBgn0000289,FBgn0000439,FBgn0000448,FBgn0000490,FBgn0000546,FBgn0000568,FBgn0000659,FBgn0000810,FBgn0001078,FBgn0001122,FBgn0001138,FBgn0001139,FBgn0001235,FBgn0001323,FBgn0001994,FBgn0002521,FBgn0002723,FBgn0003165,FBgn0003209,FBgn0003463,FBgn0003896,FBgn0003997,FBgn0004102,FBgn0004168,FBgn0004198,FBgn0004435,FBgn0004595,FBgn0004618,FBgn0004795,FBgn0004838,FBg…
sulfur compound metabolic process	GO:0006790	0.00148397	FBgn0000565,FBgn0000566,FBgn0003965,FBgn0005278,FBgn0010226,FBgn0012034,FBgn0014455,FBgn0020236,FBgn0020251,FBgn0020389,FBgn0021765,FBgn0027590,FBgn0030518,FBgn0032727,FBgn0034276,FBgn0036157,FBgn0037709,FBgn0038074,FBgn0038524,FBgn0039737,FBgn0039856,FBgn0052068,FBgn0052500,FBgn0052857,FBgn0053502,FBgn0063491,FBgn0063493,FBgn0263120																	dendrite morphogenesis	GO:0048813	4.43773e-07	FBgn0000017,FBgn0000546,FBgn0001078,FBgn0001122,FBgn0001139,FBgn0002521,FBgn0003165,FBgn0003896,FBgn0003997,FBgn0004198,FBgn0004595,FBgn0004795,FBgn0004880,FBgn0010473,FBgn0011259,FBgn0011766,FBgn0014010,FBgn0015609,FBgn0015664,FBgn0015774,FBgn0023215,FBgn0027339,FBgn0036494,FBgn0085369,FBgn0085391,FBgn0085409,FBgn0085450,FBgn0086680,FBgn0260799,FBgn0263930,FBgn0264273,FBgn0264442,FBgn0264953,FBg…
oxidoreduction coenzyme metabolic process	GO:0006733	0.00148784	FBgn0001092,FBgn0001187,FBgn0003074,FBgn0004057,FBgn0004654,FBgn0022160,FBgn0023477,FBgn0027621,FBgn0030239,FBgn0033373,FBgn0035436,FBgn0037001,FBgn0050499,FBgn0086355,FBgn0250906,FBgn0262782																	instar larval or pupal development	GO:0002165	4.50707e-07	FBgn0000179,FBgn0000253,FBgn0000273,FBgn0000276,FBgn0000289,FBgn0000308,FBgn0000489,FBgn0000490,FBgn0000546,FBgn0000568,FBgn0000659,FBgn0001078,FBgn0001122,FBgn0001235,FBgn0002306,FBgn0003209,FBgn0003463,FBgn0003997,FBgn0004102,FBgn0004198,FBgn0004395,FBgn0004569,FBgn0004635,FBgn0004910,FBgn0010113,FBgn0010313,FBgn0010825,FBgn0011224,FBgn0011760,FBgn0011817,FBgn0014010,FBgn0016977,FBgn0020521,FBg…
lipid catabolic process	GO:0016042	0.00153475	FBgn0001248,FBgn0010516,FBgn0010591,FBgn0027572,FBgn0028479,FBgn0029969,FBgn0030607,FBgn0030731,FBgn0030828,FBgn0032161,FBgn0032162,FBgn0034488,FBgn0034628,FBgn0034629,FBgn0034997,FBgn0036449,FBgn0036836,FBgn0037440,FBgn0037819,FBgn0040064,FBgn0040349,FBgn0051414,FBgn0263593																	regulation of response to stimulus	GO:0048583	7.55873e-07	FBgn0000253,FBgn0000273,FBgn0000308,FBgn0000479,FBgn0000490,FBgn0001122,FBgn0001139,FBgn0001235,FBgn0003165,FBgn0003209,FBgn0003218,FBgn0003463,FBgn0003997,FBgn0004168,FBgn0004198,FBgn0004240,FBgn0004244,FBgn0004435,FBgn0004569,FBgn0004580,FBgn0004635,FBgn0004876,FBgn0004957,FBgn0010388,FBgn0010825,FBgn0011224,FBgn0011259,FBgn0011582,FBgn0011817,FBgn0013576,FBgn0013799,FBgn0014135,FBgn0015024,FBg…
macromolecular complex subunit organization	GO:0043933	0.00172316	FBgn0000100,FBgn0000565,FBgn0002590,FBgn0002622,FBgn0002626,FBgn0003274,FBgn0003279,FBgn0003517,FBgn0003941,FBgn0003942,FBgn0003965,FBgn0004403,FBgn0004867,FBgn0004926,FBgn0005533,FBgn0005593,FBgn0010198,FBgn0010225,FBgn0010265,FBgn0010391,FBgn0010408,FBgn0010411,FBgn0010747,FBgn0011272,FBgn0011284,FBgn0013325,FBgn0014026,FBgn0015268,FBgn0015288,FBgn0015521,FBgn0015756,FBgn0015834,FBgn0016687,FBg…																	regulation of cell development	GO:0060284	8.40929e-07	FBgn0000017,FBgn0000273,FBgn0000308,FBgn0000546,FBgn0001122,FBgn0001235,FBgn0003997,FBgn0004102,FBgn0004117,FBgn0004242,FBgn0004395,FBgn0004435,FBgn0004569,FBgn0004595,FBgn0004876,FBgn0010113,FBgn0010300,FBgn0010473,FBgn0011259,FBgn0011760,FBgn0011766,FBgn0013343,FBgn0015609,FBgn0015774,FBgn0023215,FBgn0026375,FBgn0063485,FBgn0085391,FBgn0085409,FBgn0086680,FBgn0243512,FBgn0259168,FBgn0259176,FBg…
protein targeting to membrane	GO:0006612	0.00184224	FBgn0010391,FBgn0010638,FBgn0010747,FBgn0011016,FBgn0025700,FBgn0028327,FBgn0035771,FBgn0035947,FBgn0038810,FBgn0038947,FBgn0262125																	neuromuscular junction development	GO:0007528	1.05517e-06	FBgn0000017,FBgn0000044,FBgn0001122,FBgn0002921,FBgn0003165,FBgn0004516,FBgn0004575,FBgn0010300,FBgn0010415,FBgn0011817,FBgn0013759,FBgn0020386,FBgn0030897,FBgn0034720,FBgn0034789,FBgn0036544,FBgn0038063,FBgn0038980,FBgn0040752,FBgn0041605,FBgn0083228,FBgn0083963,FBgn0086677,FBgn0259168,FBgn0263456,FBgn0264006,FBgn0265784,FBgn0266521
tetrahydrofolate metabolic process	GO:0046653	0.00247501	FBgn0010222,FBgn0020385,FBgn0029823,FBgn0032945,FBgn0085453																	post-embryonic animal organ development	GO:0048569	1.10562e-06	FBgn0000179,FBgn0000273,FBgn0000289,FBgn0000308,FBgn0000489,FBgn0000490,FBgn0000546,FBgn0001078,FBgn0001122,FBgn0001235,FBgn0001994,FBgn0003463,FBgn0003997,FBgn0004102,FBgn0004198,FBgn0004395,FBgn0004569,FBgn0004635,FBgn0010313,FBgn0010825,FBgn0011224,FBgn0011760,FBgn0011766,FBgn0011817,FBgn0014010,FBgn0016977,FBgn0020521,FBgn0022238,FBgn0024189,FBgn0024244,FBgn0026411,FBgn0028369,FBgn0033033,FBg…
triglyceride metabolic process	GO:0006641	0.00249485	FBgn0004797,FBgn0025592,FBgn0030607,FBgn0033246,FBgn0035266,FBgn0036449,FBgn0053120,FBgn0263593,FBgn0264494,FBgn0283427																	compound eye development	GO:0048749	1.18584e-06	FBgn0000017,FBgn0000179,FBgn0000253,FBgn0000273,FBgn0000490,FBgn0001235,FBgn0003285,FBgn0003997,FBgn0004102,FBgn0004395,FBgn0004435,FBgn0004569,FBgn0004595,FBgn0004618,FBgn0004858,FBgn0004876,FBgn0010473,FBgn0011817,FBgn0015609,FBgn0015664,FBgn0015774,FBgn0016977,FBgn0017590,FBgn0024189,FBgn0026411,FBgn0028369,FBgn0028704,FBgn0029082,FBgn0034408,FBgn0039532,FBgn0040505,FBgn0086677,FBgn0086898,FBg…
ammonium ion metabolic process	GO:0097164	0.0034504	FBgn0000536,FBgn0003656,FBgn0013307,FBgn0019932,FBgn0025615,FBgn0027095,FBgn0033367,FBgn0034997,FBgn0037723,FBgn0038795,FBgn0086367,FBgn0283437																	dendrite development	GO:0016358	1.21781e-06	FBgn0000017,FBgn0000546,FBgn0001078,FBgn0001122,FBgn0001139,FBgn0002521,FBgn0003165,FBgn0003896,FBgn0003997,FBgn0004198,FBgn0004595,FBgn0004795,FBgn0004880,FBgn0010473,FBgn0011259,FBgn0011766,FBgn0014010,FBgn0015609,FBgn0015664,FBgn0015774,FBgn0023215,FBgn0027339,FBgn0036494,FBgn0085369,FBgn0085391,FBgn0085409,FBgn0085450,FBgn0086680,FBgn0260799,FBgn0263930,FBgn0264273,FBgn0264442,FBgn0264953,FBg…
amine metabolic process	GO:0009308	0.00362067	FBgn0002022,FBgn0003308,FBgn0003965,FBgn0013307,FBgn0019932,FBgn0025615,FBgn0031824,FBgn0032482,FBgn0037723,FBgn0086367																	regulation of membrane potential	GO:0042391	1.32512e-06	FBgn0000038,FBgn0000535,FBgn0003380,FBgn0004435,FBgn0015664,FBgn0026086,FBgn0028875,FBgn0029761,FBgn0031424,FBgn0032151,FBgn0085387,FBgn0086778,FBgn0259918,FBgn0260499,FBgn0260812,FBgn0261612,FBgn0263257,FBgn0263397,FBgn0264953,FBgn0266347
cellular amine metabolic process	GO:0044106	0.00362067	FBgn0002022,FBgn0003308,FBgn0003965,FBgn0013307,FBgn0019932,FBgn0025615,FBgn0031824,FBgn0032482,FBgn0037723,FBgn0086367																	regulation of cellular component organization	GO:0051128	1.77293e-06	FBgn0000017,FBgn0000044,FBgn0000273,FBgn0000308,FBgn0000490,FBgn0000659,FBgn0001122,FBgn0001323,FBgn0002921,FBgn0003165,FBgn0003209,FBgn0003475,FBgn0004117,FBgn0004242,FBgn0004595,FBgn0005586,FBgn0010300,FBgn0010415,FBgn0010473,FBgn0010825,FBgn0011259,FBgn0011817,FBgn0013343,FBgn0013759,FBgn0014010,FBgn0015024,FBgn0015609,FBgn0015774,FBgn0020269,FBgn0020386,FBgn0023215,FBgn0026375,FBgn0026620,FBg…
nucleobase biosynthetic process	GO:0046112	0.0037013	FBgn0000053,FBgn0000447,FBgn0003189,FBgn0020385,FBgn0037513,FBgn0041194,FBgn0086450																	tube development	GO:0035295	1.89143e-06	FBgn0000179,FBgn0000273,FBgn0000289,FBgn0000308,FBgn0000489,FBgn0000490,FBgn0000546,FBgn0000633,FBgn0000659,FBgn0001078,FBgn0001122,FBgn0001235,FBgn0003209,FBgn0003463,FBgn0003896,FBgn0003997,FBgn0004102,FBgn0004198,FBgn0004395,FBgn0004569,FBgn0004635,FBgn0004858,FBgn0005626,FBgn0010113,FBgn0010313,FBgn0010825,FBgn0011224,FBgn0011481,FBgn0011760,FBgn0011766,FBgn0011817,FBgn0013343,FBgn0014010,FBg…
nucleotide metabolic process	GO:0009117	0.00437469	FBgn0000052,FBgn0000053,FBgn0000150,FBgn0000239,FBgn0001092,FBgn0001187,FBgn0003074,FBgn0003116,FBgn0003204,FBgn0004057,FBgn0004654,FBgn0004852,FBgn0010217,FBgn0010516,FBgn0011205,FBgn0011703,FBgn0016691,FBgn0019644,FBgn0019957,FBgn0020235,FBgn0020513,FBgn0021765,FBgn0022160,FBgn0022710,FBgn0023477,FBgn0027493,FBgn0027621,FBgn0030239,FBgn0030431,FBgn0031489,FBgn0032833,FBgn0033373,FBgn0033735,FBg…																	epithelial tube morphogenesis	GO:0060562	1.98082e-06	FBgn0000179,FBgn0000273,FBgn0000289,FBgn0000308,FBgn0000489,FBgn0000490,FBgn0000546,FBgn0000633,FBgn0000659,FBgn0001078,FBgn0001122,FBgn0001235,FBgn0003209,FBgn0003463,FBgn0003997,FBgn0004102,FBgn0004198,FBgn0004395,FBgn0004569,FBgn0004635,FBgn0010113,FBgn0010313,FBgn0010825,FBgn0011224,FBgn0011760,FBgn0011817,FBgn0014010,FBgn0014135,FBgn0016977,FBgn0020521,FBgn0024244,FBgn0026411,FBgn0032414,FBg…
NADPH regeneration	GO:0006740	0.00464915	FBgn0004654,FBgn0023477,FBgn0030239,FBgn0050499																	eye development	GO:0001654	2.08321e-06	FBgn0000017,FBgn0000179,FBgn0000253,FBgn0000273,FBgn0000490,FBgn0001235,FBgn0003285,FBgn0003997,FBgn0004102,FBgn0004395,FBgn0004435,FBgn0004569,FBgn0004595,FBgn0004618,FBgn0004858,FBgn0004876,FBgn0010473,FBgn0010825,FBgn0011817,FBgn0015609,FBgn0015664,FBgn0015774,FBgn0016977,FBgn0017590,FBgn0024189,FBgn0026411,FBgn0028369,FBgn0028704,FBgn0029082,FBgn0034408,FBgn0039532,FBgn0040505,FBgn0086677,FBg…
pentose-phosphate shunt, oxidative branch	GO:0009051	0.00464915	FBgn0004654,FBgn0023477,FBgn0030239,FBgn0050499																	epithelium development	GO:0060429	2.64897e-06	FBgn0000017,FBgn0000179,FBgn0000273,FBgn0000289,FBgn0000308,FBgn0000489,FBgn0000490,FBgn0000546,FBgn0000633,FBgn0000636,FBgn0000659,FBgn0000810,FBgn0001078,FBgn0001122,FBgn0001235,FBgn0001404,FBgn0003209,FBgn0003463,FBgn0003475,FBgn0003896,FBgn0003997,FBgn0004102,FBgn0004198,FBgn0004395,FBgn0004569,FBgn0004635,FBgn0004838,FBgn0004858,FBgn0005626,FBgn0010113,FBgn0010238,FBgn0010313,FBgn0010825,FBg…
nucleoside phosphate metabolic process	GO:0006753	0.00491907	FBgn0000052,FBgn0000053,FBgn0000150,FBgn0000239,FBgn0001092,FBgn0001187,FBgn0003074,FBgn0003116,FBgn0003204,FBgn0004057,FBgn0004654,FBgn0004852,FBgn0010217,FBgn0010516,FBgn0011205,FBgn0011703,FBgn0016691,FBgn0019644,FBgn0019957,FBgn0020235,FBgn0020513,FBgn0021765,FBgn0022160,FBgn0022710,FBgn0023477,FBgn0027493,FBgn0027621,FBgn0030239,FBgn0030431,FBgn0031489,FBgn0032833,FBgn0033373,FBgn0033735,FBg…																	regulation of macromolecule biosynthetic process	GO:0010556	2.64939e-06	FBgn0000179,FBgn0000273,FBgn0000289,FBgn0000439,FBgn0000448,FBgn0000490,FBgn0000546,FBgn0000568,FBgn0000659,FBgn0000810,FBgn0001078,FBgn0001138,FBgn0001139,FBgn0001235,FBgn0001323,FBgn0001994,FBgn0002521,FBgn0002723,FBgn0003165,FBgn0003463,FBgn0003896,FBgn0004102,FBgn0004198,FBgn0004595,FBgn0004618,FBgn0004795,FBgn0004838,FBgn0004865,FBgn0004880,FBgn0010300,FBgn0010313,FBgn0010415,FBgn0010825,FBg…
neutral lipid metabolic process	GO:0006638	0.0050036	FBgn0004797,FBgn0025592,FBgn0030607,FBgn0033246,FBgn0035266,FBgn0036449,FBgn0053120,FBgn0263593,FBgn0264494,FBgn0283427																	regulation of cellular macromolecule biosynthetic process	GO:2000112	2.66548e-06	FBgn0000179,FBgn0000273,FBgn0000289,FBgn0000439,FBgn0000448,FBgn0000490,FBgn0000546,FBgn0000568,FBgn0000659,FBgn0000810,FBgn0001078,FBgn0001138,FBgn0001139,FBgn0001235,FBgn0001323,FBgn0001994,FBgn0002521,FBgn0002723,FBgn0003165,FBgn0003463,FBgn0003896,FBgn0004102,FBgn0004198,FBgn0004595,FBgn0004618,FBgn0004795,FBgn0004838,FBgn0004865,FBgn0004880,FBgn0010300,FBgn0010313,FBgn0010415,FBgn0010825,FBg…
acylglycerol metabolic process	GO:0006639	0.0050036	FBgn0004797,FBgn0025592,FBgn0030607,FBgn0033246,FBgn0035266,FBgn0036449,FBgn0053120,FBgn0263593,FBgn0264494,FBgn0283427																	neurotransmitter transport	GO:0006836	3.24733e-06	FBgn0004242,FBgn0004575,FBgn0005586,FBgn0011288,FBgn0013342,FBgn0013343,FBgn0013759,FBgn0025726,FBgn0028400,FBgn0028582,FBgn0029663,FBgn0029762,FBgn0030505,FBgn0030897,FBgn0031424,FBgn0035756,FBgn0038659,FBgn0041605,FBgn0053547,FBgn0083228,FBgn0259246,FBgn0260964,FBgn0262476,FBgn0263397,FBgn0270928
nucleobase metabolic process	GO:0009112	0.0050036	FBgn0000053,FBgn0000447,FBgn0003189,FBgn0003308,FBgn0020385,FBgn0023537,FBgn0037513,FBgn0041194,FBgn0086450,FBgn0267408																	negative regulation of biosynthetic process	GO:0009890	3.99694e-06	FBgn0000179,FBgn0000439,FBgn0000448,FBgn0000546,FBgn0000568,FBgn0000659,FBgn0000810,FBgn0001139,FBgn0001323,FBgn0002521,FBgn0003165,FBgn0004102,FBgn0004168,FBgn0004198,FBgn0004595,FBgn0004795,FBgn0004838,FBgn0004865,FBgn0004880,FBgn0010300,FBgn0010313,FBgn0010415,FBgn0010825,FBgn0011224,FBgn0011666,FBgn0011766,FBgn0022238,FBgn0023215,FBgn0024244,FBgn0026086,FBgn0026411,FBgn0026573,FBgn0027339,FBg…
galactose metabolic process	GO:0006012	0.00552487	FBgn0003076,FBgn0035147,FBgn0035679,FBgn0043783,FBgn0263199,FBgn0263200																	negative regulation of cellular biosynthetic process	GO:0031327	3.99694e-06	FBgn0000179,FBgn0000439,FBgn0000448,FBgn0000546,FBgn0000568,FBgn0000659,FBgn0000810,FBgn0001139,FBgn0001323,FBgn0002521,FBgn0003165,FBgn0004102,FBgn0004168,FBgn0004198,FBgn0004595,FBgn0004795,FBgn0004838,FBgn0004865,FBgn0004880,FBgn0010300,FBgn0010313,FBgn0010415,FBgn0010825,FBgn0011224,FBgn0011666,FBgn0011766,FBgn0022238,FBgn0023215,FBgn0024244,FBgn0026086,FBgn0026411,FBgn0026573,FBgn0027339,FBg…
lipid modification	GO:0030258	0.00622279	FBgn0001248,FBgn0010516,FBgn0027572,FBgn0028479,FBgn0029969,FBgn0030731,FBgn0032161,FBgn0032162,FBgn0034488,FBgn0034628,FBgn0034629,FBgn0035945,FBgn0037166,FBgn0037167,FBgn0037440,FBgn0037612,FBgn0037819,FBgn0038984,FBgn0040064,FBgn0040349																	imaginal disc development	GO:0007444	4.857e-06	FBgn0000179,FBgn0000273,FBgn0000289,FBgn0000308,FBgn0000489,FBgn0000490,FBgn0000546,FBgn0001078,FBgn0001122,FBgn0001235,FBgn0003463,FBgn0003896,FBgn0003997,FBgn0004102,FBgn0004198,FBgn0004395,FBgn0004569,FBgn0004635,FBgn0004858,FBgn0005626,FBgn0010313,FBgn0010825,FBgn0011224,FBgn0011481,FBgn0011760,FBgn0011766,FBgn0011817,FBgn0013343,FBgn0014010,FBgn0014135,FBgn0016977,FBgn0020521,FBgn0023083,FBg…
glucose homeostasis	GO:0042593	0.00624775	FBgn0001187,FBgn0023479,FBgn0032940,FBgn0034140,FBgn0036046,FBgn0038984,FBgn0086687																	imaginal disc-derived appendage development	GO:0048737	4.98308e-06	FBgn0000179,FBgn0000273,FBgn0000289,FBgn0000489,FBgn0000490,FBgn0000546,FBgn0001078,FBgn0001122,FBgn0001235,FBgn0003463,FBgn0003997,FBgn0004198,FBgn0004395,FBgn0004569,FBgn0004635,FBgn0004858,FBgn0010313,FBgn0010825,FBgn0011224,FBgn0011760,FBgn0011817,FBgn0013343,FBgn0014010,FBgn0016977,FBgn0020521,FBgn0024244,FBgn0026411,FBgn0034072,FBgn0035719,FBgn0036844,FBgn0039257,FBgn0039532,FBgn0052062,FBg…
branched-chain amino acid metabolic process	GO:0009081	0.00700808	FBgn0023537,FBgn0030482,FBgn0035911,FBgn0037709,FBgn0042083																	negative regulation of macromolecule biosynthetic process	GO:0010558	5.00471e-06	FBgn0000179,FBgn0000439,FBgn0000448,FBgn0000546,FBgn0000568,FBgn0000659,FBgn0000810,FBgn0001139,FBgn0001323,FBgn0002521,FBgn0003165,FBgn0004102,FBgn0004198,FBgn0004595,FBgn0004795,FBgn0004838,FBgn0004865,FBgn0004880,FBgn0010300,FBgn0010313,FBgn0010415,FBgn0010825,FBgn0011224,FBgn0011666,FBgn0011766,FBgn0022238,FBgn0023215,FBgn0024244,FBgn0026086,FBgn0026411,FBgn0026573,FBgn0027339,FBgn0027499,FBg…
cofactor biosynthetic process	GO:0051188	0.00717006	FBgn0005278,FBgn0011205,FBgn0012034,FBgn0020236,FBgn0020385,FBgn0023536,FBgn0030407,FBgn0030431,FBgn0033373,FBgn0033428,FBgn0035436,FBgn0035632,FBgn0037001,FBgn0037709,FBgn0051472,FBgn0052500,FBgn0052857,FBgn0053502,FBgn0085453,FBgn0263120																	detection of external stimulus	GO:0009581	5.03488e-06	FBgn0000253,FBgn0001122,FBgn0003218,FBgn0003380,FBgn0004435,FBgn0005614,FBgn0010415,FBgn0013576,FBgn0013995,FBgn0023215,FBgn0032840,FBgn0033438,FBgn0034789,FBgn0036260,FBgn0085385,FBgn0085387,FBgn0085391,FBgn0085409,FBgn0262738,FBgn0263995,FBgn0264953,FBgn0267252
pteridine-containing compound metabolic process	GO:0042558	0.0105299	FBgn0003116,FBgn0010222,FBgn0020385,FBgn0029823,FBgn0030407,FBgn0032945,FBgn0085453																	detection of abiotic stimulus	GO:0009582	5.03488e-06	FBgn0000253,FBgn0001122,FBgn0003218,FBgn0003380,FBgn0004435,FBgn0005614,FBgn0010415,FBgn0013576,FBgn0013995,FBgn0023215,FBgn0032840,FBgn0033438,FBgn0034789,FBgn0036260,FBgn0085385,FBgn0085387,FBgn0085391,FBgn0085409,FBgn0262738,FBgn0263995,FBgn0264953,FBgn0267252
aspartate family amino acid biosynthetic process	GO:0009067	0.0106699	FBgn0000566,FBgn0001124,FBgn0030518,FBgn0032727,FBgn0052068,FBgn0270926																	response to temperature stimulus	GO:0009266	5.16574e-06	FBgn0000273,FBgn0000479,FBgn0001122,FBgn0002921,FBgn0004435,FBgn0004575,FBgn0005626,FBgn0011582,FBgn0013275,FBgn0013276,FBgn0013576,FBgn0023215,FBgn0026086,FBgn0031857,FBgn0032840,FBgn0085385,FBgn0085391,FBgn0085409,FBgn0262737,FBgn0262738,FBgn0263106,FBgn0263995,FBgn0264953,FBgn0265193,FBgn0265605,FBgn0265784
ncRNA processing	GO:0034470	0.0108044	FBgn0003062,FBgn0003517,FBgn0005593,FBgn0011824,FBgn0014026,FBgn0015393,FBgn0015521,FBgn0021765,FBgn0025366,FBgn0026079,FBgn0026196,FBgn0027094,FBgn0028426,FBgn0028744,FBgn0029148,FBgn0029714,FBgn0029785,FBgn0030177,FBgn0030720,FBgn0032050,FBgn0032404,FBgn0033454,FBgn0033741,FBgn0034743,FBgn0036213,FBgn0036686,FBgn0036916,FBgn0037073,FBgn0037137,FBgn0037529,FBgn0037713,FBgn0037926,FBgn0038146,FBg…																	regulation of gene expression	GO:0010468	5.22645e-06	FBgn0000179,FBgn0000273,FBgn0000289,FBgn0000439,FBgn0000448,FBgn0000490,FBgn0000546,FBgn0000568,FBgn0000659,FBgn0000810,FBgn0001078,FBgn0001138,FBgn0001139,FBgn0001235,FBgn0001323,FBgn0001994,FBgn0002521,FBgn0002723,FBgn0003165,FBgn0003463,FBgn0003896,FBgn0004102,FBgn0004198,FBgn0004595,FBgn0004618,FBgn0004635,FBgn0004795,FBgn0004838,FBgn0004858,FBgn0004865,FBgn0004880,FBgn0010113,FBgn0010300,FBg…
coenzyme biosynthetic process	GO:0009108	0.0115686	FBgn0005278,FBgn0011205,FBgn0012034,FBgn0020236,FBgn0020385,FBgn0030407,FBgn0030431,FBgn0033373,FBgn0035436,FBgn0035632,FBgn0037001,FBgn0037709,FBgn0051472,FBgn0085453,FBgn0263120																	imaginal disc morphogenesis	GO:0007560	5.54689e-06	FBgn0000179,FBgn0000273,FBgn0000289,FBgn0000308,FBgn0000489,FBgn0000490,FBgn0000546,FBgn0001078,FBgn0001122,FBgn0001235,FBgn0003463,FBgn0003997,FBgn0004102,FBgn0004198,FBgn0004395,FBgn0004569,FBgn0004635,FBgn0010313,FBgn0010825,FBgn0011224,FBgn0011760,FBgn0011817,FBgn0014010,FBgn0016977,FBgn0020521,FBgn0024244,FBgn0026411,FBgn0033033,FBgn0033438,FBgn0034072,FBgn0035719,FBgn0036844,FBgn0039257,FBg…
lipid homeostasis	GO:0055088	0.0115686	FBgn0011205,FBgn0025615,FBgn0028519,FBgn0030607,FBgn0032940,FBgn0034140,FBgn0035632,FBgn0036046,FBgn0036449,FBgn0037612,FBgn0038074,FBgn0038984,FBgn0086687,FBgn0261283,FBgn0263593																	post-embryonic animal organ morphogenesis	GO:0048563	5.54689e-06	FBgn0000179,FBgn0000273,FBgn0000289,FBgn0000308,FBgn0000489,FBgn0000490,FBgn0000546,FBgn0001078,FBgn0001122,FBgn0001235,FBgn0003463,FBgn0003997,FBgn0004102,FBgn0004198,FBgn0004395,FBgn0004569,FBgn0004635,FBgn0010313,FBgn0010825,FBgn0011224,FBgn0011760,FBgn0011817,FBgn0014010,FBgn0016977,FBgn0020521,FBgn0024244,FBgn0026411,FBgn0033033,FBgn0033438,FBgn0034072,FBgn0035719,FBgn0036844,FBgn0039257,FBg…
glutamine family amino acid metabolic process	GO:0009064	0.0123081	FBgn0001124,FBgn0001125,FBgn0003189,FBgn0003308,FBgn0015781,FBgn0023535,FBgn0026565,FBgn0029689,FBgn0030653,FBgn0032076																	tube morphogenesis	GO:0035239	5.70531e-06	FBgn0000179,FBgn0000273,FBgn0000289,FBgn0000308,FBgn0000489,FBgn0000490,FBgn0000546,FBgn0000633,FBgn0000659,FBgn0001078,FBgn0001122,FBgn0001235,FBgn0003209,FBgn0003463,FBgn0003997,FBgn0004102,FBgn0004198,FBgn0004395,FBgn0004569,FBgn0004635,FBgn0010113,FBgn0010313,FBgn0010825,FBgn0011224,FBgn0011760,FBgn0011817,FBgn0014010,FBgn0014135,FBgn0016977,FBgn0020521,FBgn0022238,FBgn0024244,FBgn0026411,FBg…
cellular modified amino acid metabolic process	GO:0006575	0.0125158	FBgn0000566,FBgn0010222,FBgn0010226,FBgn0014455,FBgn0020385,FBgn0026565,FBgn0027590,FBgn0029823,FBgn0030407,FBgn0031824,FBgn0032945,FBgn0034276,FBgn0038074,FBgn0063491,FBgn0063493,FBgn0085453																	cellular component organization	GO:0016043	5.72347e-06	FBgn0000017,FBgn0000044,FBgn0000046,FBgn0000108,FBgn0000253,FBgn0000273,FBgn0000276,FBgn0000308,FBgn0000479,FBgn0000490,FBgn0000535,FBgn0000546,FBgn0000636,FBgn0000659,FBgn0000810,FBgn0001078,FBgn0001122,FBgn0001138,FBgn0001139,FBgn0001142,FBgn0001323,FBgn0001404,FBgn0002306,FBgn0002521,FBgn0002773,FBgn0002921,FBgn0003165,FBgn0003209,FBgn0003227,FBgn0003285,FBgn0003380,FBgn0003386,FBgn0003435,FBg…
acyl-CoA metabolic process	GO:0006637	0.0126271	FBgn0003965,FBgn0012034,FBgn0020236,FBgn0021765,FBgn0037709,FBgn0039737,FBgn0039856,FBgn0263120																	positive regulation of biosynthetic process	GO:0009891	5.75658e-06	FBgn0000439,FBgn0000448,FBgn0000546,FBgn0000659,FBgn0001078,FBgn0001138,FBgn0001235,FBgn0002521,FBgn0002723,FBgn0003165,FBgn0003896,FBgn0004102,FBgn0004595,FBgn0004618,FBgn0004795,FBgn0004838,FBgn0010388,FBgn0011481,FBgn0011582,FBgn0011766,FBgn0013799,FBgn0015664,FBgn0022238,FBgn0023178,FBgn0024244,FBgn0026160,FBgn0026262,FBgn0026411,FBgn0030034,FBgn0030897,FBgn0032048,FBgn0032202,FBgn0033865,FBg…
thioester metabolic process	GO:0035383	0.0126271	FBgn0003965,FBgn0012034,FBgn0020236,FBgn0021765,FBgn0037709,FBgn0039737,FBgn0039856,FBgn0263120																	positive regulation of cellular biosynthetic process	GO:0031328	5.75658e-06	FBgn0000439,FBgn0000448,FBgn0000546,FBgn0000659,FBgn0001078,FBgn0001138,FBgn0001235,FBgn0002521,FBgn0002723,FBgn0003165,FBgn0003896,FBgn0004102,FBgn0004595,FBgn0004618,FBgn0004795,FBgn0004838,FBgn0010388,FBgn0011481,FBgn0011582,FBgn0011766,FBgn0013799,FBgn0015664,FBgn0022238,FBgn0023178,FBgn0024244,FBgn0026160,FBgn0026262,FBgn0026411,FBgn0030034,FBgn0030897,FBgn0032048,FBgn0032202,FBgn0033865,FBg…
protein targeting	GO:0006605	0.0137096	FBgn0010391,FBgn0010638,FBgn0010747,FBgn0011016,FBgn0015245,FBgn0025700,FBgn0028327,FBgn0030306,FBgn0030679,FBgn0031049,FBgn0031282,FBgn0033918,FBgn0035771,FBgn0035947,FBgn0036300,FBgn0036920,FBgn0038810,FBgn0038947,FBgn0039172,FBgn0083968,FBgn0086679,FBgn0250814,FBgn0262125																	regulation of RNA metabolic process	GO:0051252	6.09419e-06	FBgn0000179,FBgn0000273,FBgn0000289,FBgn0000439,FBgn0000448,FBgn0000490,FBgn0000546,FBgn0000568,FBgn0000659,FBgn0001078,FBgn0001138,FBgn0001139,FBgn0001235,FBgn0001323,FBgn0001994,FBgn0002521,FBgn0002723,FBgn0003165,FBgn0003463,FBgn0003896,FBgn0004102,FBgn0004198,FBgn0004595,FBgn0004618,FBgn0004795,FBgn0004838,FBgn0004865,FBgn0004880,FBgn0010313,FBgn0010825,FBgn0011481,FBgn0011766,FBgn0013799,FBg…
sleep	GO:0030431	0.0140284	FBgn0000477,FBgn0002719,FBgn0003068,FBgn0014396,FBgn0015245,FBgn0023129,FBgn0024289,FBgn0025454,FBgn0026563,FBgn0027348,FBgn0027657,FBgn0028519,FBgn0029969,FBgn0031305,FBgn0032940,FBgn0033949,FBgn0034501,FBgn0036046,FBgn0036449,FBgn0038250,FBgn0038299,FBgn0039464,FBgn0040732,FBgn0044048,FBgn0044050,FBgn0260866,FBgn0283437																	appendage development	GO:0048736	6.88943e-06	FBgn0000179,FBgn0000273,FBgn0000289,FBgn0000489,FBgn0000490,FBgn0000546,FBgn0001078,FBgn0001122,FBgn0001235,FBgn0003463,FBgn0003997,FBgn0004198,FBgn0004395,FBgn0004569,FBgn0004635,FBgn0004858,FBgn0010313,FBgn0010825,FBgn0011224,FBgn0011760,FBgn0011817,FBgn0013343,FBgn0014010,FBgn0016977,FBgn0020521,FBgn0024244,FBgn0026411,FBgn0034072,FBgn0035719,FBgn0036844,FBgn0039257,FBgn0039532,FBgn0052062,FBg…
cellular response to starvation	GO:0009267	0.0140343	FBgn0003062,FBgn0011824,FBgn0020909,FBgn0023542,FBgn0026196,FBgn0029148,FBgn0029714,FBgn0030177,FBgn0033247,FBgn0033454,FBgn0033624,FBgn0034110,FBgn0034140,FBgn0035850,FBgn0036187,FBgn0036686,FBgn0038074,FBgn0038146,FBgn0038473,FBgn0038964,FBgn0044452,FBgn0086451																	muscle structure development	GO:0061061	6.91853e-06	FBgn0000044,FBgn0000490,FBgn0000546,FBgn0001235,FBgn0001994,FBgn0002773,FBgn0003285,FBgn0003896,FBgn0004117,FBgn0004169,FBgn0004795,FBgn0005666,FBgn0010825,FBgn0020269,FBgn0024189,FBgn0025391,FBgn0028369,FBgn0029082,FBgn0031850,FBgn0033988,FBgn0034072,FBgn0040505,FBgn0063485,FBgn0085369,FBgn0086677,FBgn0259745,FBgn0261822,FBgn0261836,FBgn0263391,FBgn0264442,FBgn0264491,FBgn0265487,FBgn0265935,FBg…
organophosphate metabolic process	GO:0019637	0.0141906	FBgn0000052,FBgn0000053,FBgn0000150,FBgn0000239,FBgn0000536,FBgn0001092,FBgn0001187,FBgn0003074,FBgn0003116,FBgn0003204,FBgn0003308,FBgn0003656,FBgn0004057,FBgn0004654,FBgn0004852,FBgn0010217,FBgn0010516,FBgn0011205,FBgn0011703,FBgn0016691,FBgn0019644,FBgn0019957,FBgn0020235,FBgn0020513,FBgn0021765,FBgn0022160,FBgn0022710,FBgn0023477,FBgn0025592,FBgn0026576,FBgn0027493,FBgn0027579,FBgn0027621,FBg…																	synapse assembly	GO:0007416	7.71948e-06	FBgn0000017,FBgn0001122,FBgn0002921,FBgn0003165,FBgn0004516,FBgn0004575,FBgn0004595,FBgn0010300,FBgn0010415,FBgn0011259,FBgn0011817,FBgn0013759,FBgn0020386,FBgn0034720,FBgn0034789,FBgn0038063,FBgn0038980,FBgn0040752,FBgn0041605,FBgn0083963,FBgn0086677,FBgn0259168,FBgn0262739,FBgn0263456,FBgn0264006,FBgn0266521
glycosyl compound metabolic process	GO:1901657	0.0145177	FBgn0000150,FBgn0000239,FBgn0003204,FBgn0014455,FBgn0031489,FBgn0034117,FBgn0034215,FBgn0034276,FBgn0035348,FBgn0035436,FBgn0036030,FBgn0036337,FBgn0038074,FBgn0038172,FBgn0039464,FBgn0041194																	regulation of localization	GO:0032879	8.29586e-06	FBgn0000017,FBgn0000044,FBgn0000253,FBgn0000273,FBgn0000308,FBgn0000535,FBgn0003380,FBgn0003386,FBgn0004242,FBgn0004595,FBgn0005586,FBgn0005626,FBgn0010300,FBgn0011259,FBgn0013343,FBgn0013759,FBgn0014010,FBgn0014135,FBgn0015609,FBgn0015774,FBgn0027556,FBgn0028400,FBgn0029939,FBgn0030505,FBgn0030897,FBgn0031294,FBgn0032901,FBgn0035505,FBgn0040697,FBgn0041605,FBgn0063485,FBgn0083228,FBgn0085426,FBg…
triglyceride biosynthetic process	GO:0019432	0.0152489	FBgn0004797,FBgn0033246,FBgn0053120,FBgn0263593,FBgn0283427																	negative regulation of cellular macromolecule biosynthetic process	GO:2000113	8.29586e-06	FBgn0000179,FBgn0000439,FBgn0000448,FBgn0000546,FBgn0000568,FBgn0000659,FBgn0000810,FBgn0001139,FBgn0001323,FBgn0002521,FBgn0003165,FBgn0004102,FBgn0004198,FBgn0004595,FBgn0004795,FBgn0004838,FBgn0004865,FBgn0004880,FBgn0010300,FBgn0010313,FBgn0010415,FBgn0010825,FBgn0011224,FBgn0011666,FBgn0011766,FBgn0022238,FBgn0023215,FBgn0024244,FBgn0026086,FBgn0026411,FBgn0026573,FBgn0027339,FBgn0027499,FBg…
carbohydrate biosynthetic process	GO:0016051	0.0162053	FBgn0003067,FBgn0003074,FBgn0003076,FBgn0020251,FBgn0027560,FBgn0027580,FBgn0031907,FBgn0032820,FBgn0034356,FBgn0034618,FBgn0035375,FBgn0053138,FBgn0086355																	movement of cell or subcellular component	GO:0006928	9.56295e-06	FBgn0000017,FBgn0000253,FBgn0000308,FBgn0000490,FBgn0000546,FBgn0000636,FBgn0001138,FBgn0001323,FBgn0001404,FBgn0002306,FBgn0003165,FBgn0003435,FBgn0003896,FBgn0004108,FBgn0004198,FBgn0004369,FBgn0004370,FBgn0004435,FBgn0004595,FBgn0004795,FBgn0004838,FBgn0005626,FBgn0010300,FBgn0010415,FBgn0010473,FBgn0011259,FBgn0011760,FBgn0013759,FBgn0014010,FBgn0014135,FBgn0015609,FBgn0015774,FBgn0016977,FBg…
pyruvate metabolic process	GO:0006090	0.016316	FBgn0001092,FBgn0001187,FBgn0002719,FBgn0003074,FBgn0012036,FBgn0027580,FBgn0027621,FBgn0029969,FBgn0038662,FBgn0051075,FBgn0086355,FBgn0250906																	positive regulation of cellular metabolic process	GO:0031325	9.56295e-06	FBgn0000439,FBgn0000448,FBgn0000490,FBgn0000546,FBgn0000659,FBgn0001078,FBgn0001138,FBgn0001235,FBgn0002521,FBgn0002723,FBgn0003165,FBgn0003896,FBgn0003997,FBgn0004102,FBgn0004595,FBgn0004618,FBgn0004795,FBgn0004838,FBgn0010388,FBgn0011481,FBgn0011582,FBgn0011766,FBgn0013799,FBgn0014135,FBgn0015024,FBgn0015664,FBgn0022238,FBgn0023178,FBgn0024244,FBgn0026160,FBgn0026262,FBgn0026411,FBgn0027499,FBg…
nucleotide biosynthetic process	GO:0009165	0.0165744	FBgn0000052,FBgn0000053,FBgn0000150,FBgn0000239,FBgn0003204,FBgn0004852,FBgn0010217,FBgn0010516,FBgn0011205,FBgn0011703,FBgn0016691,FBgn0019644,FBgn0020235,FBgn0020513,FBgn0022710,FBgn0027493,FBgn0030431,FBgn0033373,FBgn0035436,FBgn0035632,FBgn0036030,FBgn0036337,FBgn0038467,FBgn0039241,FBgn0039697,FBgn0260388																	sensory organ development	GO:0007423	9.9797e-06	FBgn0000017,FBgn0000179,FBgn0000253,FBgn0000273,FBgn0000490,FBgn0001235,FBgn0003285,FBgn0003896,FBgn0003997,FBgn0004102,FBgn0004395,FBgn0004435,FBgn0004569,FBgn0004595,FBgn0004618,FBgn0004858,FBgn0004876,FBgn0010473,FBgn0010825,FBgn0011666,FBgn0011760,FBgn0011817,FBgn0015609,FBgn0015664,FBgn0015774,FBgn0016977,FBgn0017590,FBgn0024189,FBgn0026411,FBgn0028369,FBgn0028704,FBgn0029082,FBgn0034408,FBg…
nucleoside phosphate biosynthetic process	GO:1901293	0.0165744	FBgn0000052,FBgn0000053,FBgn0000150,FBgn0000239,FBgn0003204,FBgn0004852,FBgn0010217,FBgn0010516,FBgn0011205,FBgn0011703,FBgn0016691,FBgn0019644,FBgn0020235,FBgn0020513,FBgn0022710,FBgn0027493,FBgn0030431,FBgn0033373,FBgn0035436,FBgn0035632,FBgn0036030,FBgn0036337,FBgn0038467,FBgn0039241,FBgn0039697,FBgn0260388																	compound eye morphogenesis	GO:0001745	1.00012e-05	FBgn0000179,FBgn0000253,FBgn0000490,FBgn0001235,FBgn0003285,FBgn0003997,FBgn0004102,FBgn0004435,FBgn0004569,FBgn0004595,FBgn0004618,FBgn0004858,FBgn0004876,FBgn0010473,FBgn0011817,FBgn0015609,FBgn0015664,FBgn0017590,FBgn0024189,FBgn0028369,FBgn0029082,FBgn0034408,FBgn0039532,FBgn0040505,FBgn0086677,FBgn0086898,FBgn0243512,FBgn0250823,FBgn0259176,FBgn0259211,FBgn0260799,FBgn0262738,FBgn0264006,FBg…
gluconeogenesis	GO:0006094	0.0165938	FBgn0003067,FBgn0003074,FBgn0027580,FBgn0032820,FBgn0034356,FBgn0086355																	regulation of anatomical structure morphogenesis	GO:0022603	1.08184e-05	FBgn0000017,FBgn0000308,FBgn0000439,FBgn0000490,FBgn0001122,FBgn0002921,FBgn0003209,FBgn0003997,FBgn0004102,FBgn0004117,FBgn0004435,FBgn0004595,FBgn0004876,FBgn0010473,FBgn0011259,FBgn0015024,FBgn0015609,FBgn0015664,FBgn0015774,FBgn0020269,FBgn0023215,FBgn0026375,FBgn0027932,FBgn0028369,FBgn0039532,FBgn0039908,FBgn0085391,FBgn0085409,FBgn0086680,FBgn0250823,FBgn0259211,FBgn0262738,FBgn0264953
SRP-dependent cotranslational protein targeting to membrane	GO:0006614	0.0165938	FBgn0010391,FBgn0010638,FBgn0010747,FBgn0025700,FBgn0035947,FBgn0038810																	positive regulation of nitrogen compound metabolic process	GO:0051173	1.11381e-05	FBgn0000439,FBgn0000448,FBgn0000490,FBgn0000546,FBgn0000659,FBgn0001078,FBgn0001138,FBgn0001235,FBgn0002521,FBgn0002723,FBgn0003165,FBgn0003896,FBgn0003997,FBgn0004102,FBgn0004595,FBgn0004618,FBgn0004795,FBgn0004838,FBgn0010388,FBgn0011481,FBgn0011582,FBgn0011766,FBgn0013799,FBgn0014135,FBgn0015024,FBgn0015664,FBgn0022238,FBgn0023178,FBgn0024244,FBgn0026160,FBgn0026262,FBgn0026411,FBgn0027499,FBg…
hexose biosynthetic process	GO:0019319	0.0165938	FBgn0003067,FBgn0003074,FBgn0027580,FBgn0032820,FBgn0034356,FBgn0086355																	positive regulation of nucleobase-containing compound metabolic process	GO:0045935	1.25821e-05	FBgn0000439,FBgn0000448,FBgn0000546,FBgn0000659,FBgn0001078,FBgn0001138,FBgn0001235,FBgn0002521,FBgn0002723,FBgn0003165,FBgn0003896,FBgn0004102,FBgn0004595,FBgn0004618,FBgn0004795,FBgn0011481,FBgn0011582,FBgn0011766,FBgn0013799,FBgn0015664,FBgn0022238,FBgn0023178,FBgn0024244,FBgn0026160,FBgn0026262,FBgn0026411,FBgn0027499,FBgn0030034,FBgn0030897,FBgn0032048,FBgn0032202,FBgn0033865,FBgn0035542,FBg…
monosaccharide biosynthetic process	GO:0046364	0.0165938	FBgn0003067,FBgn0003074,FBgn0027580,FBgn0032820,FBgn0034356,FBgn0086355																	negative regulation of signal transduction	GO:0009968	1.34127e-05	FBgn0000253,FBgn0000273,FBgn0001139,FBgn0003165,FBgn0003209,FBgn0003463,FBgn0004168,FBgn0004198,FBgn0004435,FBgn0004569,FBgn0004876,FBgn0010825,FBgn0011817,FBgn0015024,FBgn0015399,FBgn0015400,FBgn0027932,FBgn0029791,FBgn0030505,FBgn0033438,FBgn0035719,FBgn0036165,FBgn0036844,FBgn0039273,FBgn0040271,FBgn0041094,FBgn0085432,FBgn0085450,FBgn0243512,FBgn0259176,FBgn0260499,FBgn0263930,FBgn0264493,FBg…
cellular biogenic amine metabolic process	GO:0006576	0.0166928	FBgn0003308,FBgn0003965,FBgn0013307,FBgn0019932,FBgn0031824,FBgn0032482,FBgn0037723,FBgn0086367																	embryo development	GO:0009790	1.42712e-05	FBgn0000017,FBgn0000273,FBgn0000308,FBgn0000439,FBgn0000490,FBgn0000546,FBgn0000633,FBgn0000659,FBgn0000810,FBgn0001078,FBgn0001235,FBgn0002921,FBgn0003165,FBgn0003209,FBgn0003463,FBgn0003475,FBgn0003896,FBgn0003997,FBgn0004102,FBgn0004198,FBgn0004242,FBgn0004635,FBgn0004795,FBgn0004838,FBgn0004876,FBgn0004919,FBgn0010238,FBgn0010825,FBgn0013343,FBgn0013799,FBgn0014010,FBgn0019662,FBgn0022238,FBg…
carbohydrate homeostasis	GO:0033500	0.0166928	FBgn0001187,FBgn0023479,FBgn0032940,FBgn0034140,FBgn0036046,FBgn0038984,FBgn0086687,FBgn0263200																	learning	GO:0007612	1.6285e-05	FBgn0000273,FBgn0000479,FBgn0000535,FBgn0000636,FBgn0004244,FBgn0004516,FBgn0004575,FBgn0004635,FBgn0011582,FBgn0013334,FBgn0017590,FBgn0030812,FBgn0040505,FBgn0053207,FBgn0250823,FBgn0259168,FBgn0262477,FBgn0262739
arginine metabolic process	GO:0006525	0.0169707	FBgn0003308,FBgn0023535,FBgn0026565,FBgn0032076																	pattern specification process	GO:0007389	1.66069e-05	FBgn0000179,FBgn0000259,FBgn0000273,FBgn0000308,FBgn0000439,FBgn0000490,FBgn0000546,FBgn0000810,FBgn0001078,FBgn0001235,FBgn0003165,FBgn0003463,FBgn0003475,FBgn0003896,FBgn0004102,FBgn0004198,FBgn0004242,FBgn0004569,FBgn0004635,FBgn0004795,FBgn0004838,FBgn0010300,FBgn0010313,FBgn0010825,FBgn0011224,FBgn0011817,FBgn0013343,FBgn0014010,FBgn0015609,FBgn0015774,FBgn0016977,FBgn0022238,FBgn0024244,FBg…
ornithine metabolic process	GO:0006591	0.0169707	FBgn0013307,FBgn0022774,FBgn0023535,FBgn0032076																	brain development	GO:0007420	1.90782e-05	FBgn0000108,FBgn0000259,FBgn0000308,FBgn0000448,FBgn0000546,FBgn0001078,FBgn0001235,FBgn0004102,FBgn0004595,FBgn0004635,FBgn0010300,FBgn0011259,FBgn0026084,FBgn0026375,FBgn0041097,FBgn0053207,FBgn0086359,FBgn0086680,FBgn0086758,FBgn0259176,FBgn0264442,FBgn0264975
IMP metabolic process	GO:0046040	0.0169707	FBgn0000052,FBgn0000053,FBgn0020513,FBgn0027493																	imaginal disc-derived appendage morphogenesis	GO:0035114	1.9091e-05	FBgn0000179,FBgn0000273,FBgn0000289,FBgn0000489,FBgn0000490,FBgn0000546,FBgn0001078,FBgn0001122,FBgn0001235,FBgn0003463,FBgn0003997,FBgn0004198,FBgn0004395,FBgn0004569,FBgn0004635,FBgn0010313,FBgn0010825,FBgn0011224,FBgn0011760,FBgn0011817,FBgn0014010,FBgn0016977,FBgn0020521,FBgn0024244,FBgn0026411,FBgn0034072,FBgn0035719,FBgn0036844,FBgn0039257,FBgn0039532,FBgn0052062,FBgn0085432,FBgn0086898,FBg…
glycogen metabolic process	GO:0005977	0.0171845	FBgn0003076,FBgn0033246,FBgn0034110,FBgn0034618,FBgn0035850,FBgn0035978,FBgn0044452,FBgn0053138,FBgn0283427																	rhythmic behavior	GO:0007622	1.92227e-05	FBgn0000259,FBgn0000273,FBgn0000479,FBgn0000546,FBgn0003380,FBgn0004168,FBgn0004244,FBgn0022382,FBgn0023178,FBgn0026086,FBgn0027109,FBgn0032048,FBgn0035023,FBgn0039298,FBgn0053988,FBgn0260499,FBgn0263397,FBgn0264006,FBgn0265784
cellular glucan metabolic process	GO:0006073	0.0171845	FBgn0003076,FBgn0033246,FBgn0034110,FBgn0034618,FBgn0035850,FBgn0035978,FBgn0044452,FBgn0053138,FBgn0283427																	gland development	GO:0048732	2.10207e-05	FBgn0000253,FBgn0000276,FBgn0000308,FBgn0000490,FBgn0000546,FBgn0000633,FBgn0000659,FBgn0001235,FBgn0003209,FBgn0003463,FBgn0003896,FBgn0003997,FBgn0004618,FBgn0004635,FBgn0004795,FBgn0004910,FBgn0010113,FBgn0011760,FBgn0011766,FBgn0015774,FBgn0022238,FBgn0027932,FBgn0035497,FBgn0036752,FBgn0039532,FBgn0039685,FBgn0085407,FBgn0085432,FBgn0086677,FBgn0259176,FBgn0261793
energy reserve metabolic process	GO:0006112	0.0171845	FBgn0003076,FBgn0033246,FBgn0034110,FBgn0034618,FBgn0035850,FBgn0035978,FBgn0044452,FBgn0053138,FBgn0283427																	appendage morphogenesis	GO:0035107	2.35689e-05	FBgn0000179,FBgn0000273,FBgn0000289,FBgn0000489,FBgn0000490,FBgn0000546,FBgn0001078,FBgn0001122,FBgn0001235,FBgn0003463,FBgn0003997,FBgn0004198,FBgn0004395,FBgn0004569,FBgn0004635,FBgn0010313,FBgn0010825,FBgn0011224,FBgn0011760,FBgn0011817,FBgn0014010,FBgn0016977,FBgn0020521,FBgn0024244,FBgn0026411,FBgn0034072,FBgn0035719,FBgn0036844,FBgn0039257,FBgn0039532,FBgn0052062,FBgn0085432,FBgn0086898,FBg…
glucan metabolic process	GO:0044042	0.0171845	FBgn0003076,FBgn0033246,FBgn0034110,FBgn0034618,FBgn0035850,FBgn0035978,FBgn0044452,FBgn0053138,FBgn0283427																	head development	GO:0060322	2.36135e-05	FBgn0000108,FBgn0000259,FBgn0000308,FBgn0000439,FBgn0000448,FBgn0000490,FBgn0000546,FBgn0001078,FBgn0001235,FBgn0004102,FBgn0004595,FBgn0004635,FBgn0010300,FBgn0011259,FBgn0026084,FBgn0026375,FBgn0041097,FBgn0053207,FBgn0086359,FBgn0086680,FBgn0086758,FBgn0259176,FBgn0264442,FBgn0264975
purine-containing compound biosynthetic process	GO:0072522	0.0172713	FBgn0000052,FBgn0000053,FBgn0000150,FBgn0000239,FBgn0003204,FBgn0004852,FBgn0010217,FBgn0010516,FBgn0011205,FBgn0016691,FBgn0019644,FBgn0020235,FBgn0020385,FBgn0020513,FBgn0022710,FBgn0027493,FBgn0035632,FBgn0036337,FBgn0038467,FBgn0039241,FBgn0039697,FBgn0041194,FBgn0260388																	positive regulation of metabolic process	GO:0009893	2.37096e-05	FBgn0000439,FBgn0000448,FBgn0000490,FBgn0000546,FBgn0000659,FBgn0001078,FBgn0001138,FBgn0001235,FBgn0002521,FBgn0002723,FBgn0003165,FBgn0003896,FBgn0003997,FBgn0004102,FBgn0004595,FBgn0004618,FBgn0004795,FBgn0004838,FBgn0010388,FBgn0011481,FBgn0011582,FBgn0011766,FBgn0013799,FBgn0014135,FBgn0015024,FBgn0015664,FBgn0022238,FBgn0023178,FBgn0024244,FBgn0026160,FBgn0026262,FBgn0026411,FBgn0027499,FBg…
lipid metabolic process	GO:0006629	0.0174933	FBgn0000406,FBgn0000536,FBgn0001248,FBgn0003308,FBgn0003656,FBgn0004797,FBgn0010516,FBgn0010591,FBgn0010611,FBgn0020236,FBgn0021765,FBgn0024740,FBgn0025592,FBgn0025615,FBgn0026576,FBgn0027348,FBgn0027572,FBgn0027579,FBgn0028479,FBgn0028519,FBgn0029906,FBgn0029969,FBgn0030607,FBgn0030731,FBgn0030737,FBgn0030828,FBgn0032029,FBgn0032161,FBgn0032162,FBgn0032394,FBgn0032402,FBgn0033187,FBgn0033246,FBg…																	eye morphogenesis	GO:0048592	2.41333e-05	FBgn0000179,FBgn0000253,FBgn0000490,FBgn0001235,FBgn0003285,FBgn0003997,FBgn0004102,FBgn0004435,FBgn0004569,FBgn0004595,FBgn0004618,FBgn0004858,FBgn0004876,FBgn0010473,FBgn0011817,FBgn0015609,FBgn0015664,FBgn0017590,FBgn0024189,FBgn0028369,FBgn0029082,FBgn0034408,FBgn0039532,FBgn0040505,FBgn0086677,FBgn0086898,FBgn0243512,FBgn0250823,FBgn0259176,FBgn0259211,FBgn0260799,FBgn0262738,FBgn0264006,FBg…
cellular response to nutrient levels	GO:0031669	0.017821	FBgn0003062,FBgn0011824,FBgn0020909,FBgn0023542,FBgn0026196,FBgn0029148,FBgn0029714,FBgn0030177,FBgn0033247,FBgn0033454,FBgn0033624,FBgn0034110,FBgn0034140,FBgn0035850,FBgn0036187,FBgn0036686,FBgn0038074,FBgn0038146,FBgn0038473,FBgn0038964,FBgn0044452,FBgn0086451																	sensory organ morphogenesis	GO:0090596	2.41333e-05	FBgn0000179,FBgn0000253,FBgn0000490,FBgn0001235,FBgn0003285,FBgn0003997,FBgn0004102,FBgn0004435,FBgn0004569,FBgn0004595,FBgn0004618,FBgn0004858,FBgn0004876,FBgn0010473,FBgn0011817,FBgn0015609,FBgn0015664,FBgn0017590,FBgn0024189,FBgn0028369,FBgn0029082,FBgn0034408,FBgn0039532,FBgn0040505,FBgn0086677,FBgn0086898,FBgn0243512,FBgn0250823,FBgn0259176,FBgn0259211,FBgn0260799,FBgn0262738,FBgn0264006,FBg…
cellular protein metabolic process	GO:0044267	0.0183469	FBgn0000100,FBgn0000150,FBgn0000239,FBgn0000330,FBgn0000559,FBgn0002069,FBgn0002284,FBgn0002590,FBgn0002622,FBgn0002626,FBgn0002936,FBgn0003062,FBgn0003068,FBgn0003274,FBgn0003279,FBgn0003517,FBgn0003656,FBgn0003731,FBgn0003941,FBgn0003942,FBgn0004403,FBgn0004867,FBgn0004926,FBgn0005533,FBgn0005593,FBgn0005674,FBgn0010198,FBgn0010265,FBgn0010391,FBgn0010408,FBgn0010411,FBgn0010470,FBgn0010747,FBg…																	post-embryonic appendage morphogenesis	GO:0035120	2.53048e-05	FBgn0000179,FBgn0000273,FBgn0000289,FBgn0000489,FBgn0000490,FBgn0000546,FBgn0001078,FBgn0001122,FBgn0001235,FBgn0003463,FBgn0004198,FBgn0004395,FBgn0004569,FBgn0004635,FBgn0010313,FBgn0010825,FBgn0011224,FBgn0011760,FBgn0011817,FBgn0014010,FBgn0016977,FBgn0020521,FBgn0024244,FBgn0026411,FBgn0034072,FBgn0035719,FBgn0036844,FBgn0039257,FBgn0039532,FBgn0052062,FBgn0085432,FBgn0086898,FBgn0263102,FBg…
protein metabolic process	GO:0019538	0.0185381	FBgn0000100,FBgn0000150,FBgn0000239,FBgn0000330,FBgn0000455,FBgn0000559,FBgn0002069,FBgn0002284,FBgn0002590,FBgn0002622,FBgn0002626,FBgn0002930,FBgn0002936,FBgn0003062,FBgn0003068,FBgn0003274,FBgn0003279,FBgn0003517,FBgn0003656,FBgn0003731,FBgn0003941,FBgn0003942,FBgn0004403,FBgn0004867,FBgn0004885,FBgn0004926,FBgn0005533,FBgn0005593,FBgn0005674,FBgn0010198,FBgn0010265,FBgn0010391,FBgn0010408,FBg…																	synaptic vesicle cycle	GO:0099504	2.56505e-05	FBgn0004242,FBgn0004575,FBgn0005586,FBgn0010300,FBgn0011288,FBgn0013342,FBgn0013343,FBgn0013759,FBgn0014010,FBgn0025726,FBgn0028400,FBgn0028582,FBgn0030505,FBgn0032901,FBgn0035756,FBgn0038659,FBgn0041605,FBgn0053547,FBgn0083963,FBgn0259168,FBgn0260964
cellular response to external stimulus	GO:0071496	0.0189902	FBgn0003062,FBgn0011824,FBgn0020909,FBgn0023542,FBgn0026196,FBgn0028396,FBgn0029148,FBgn0029714,FBgn0030177,FBgn0033247,FBgn0033454,FBgn0033624,FBgn0034110,FBgn0034140,FBgn0035850,FBgn0036187,FBgn0036686,FBgn0038074,FBgn0038146,FBgn0038473,FBgn0038964,FBgn0044452,FBgn0086451																	cellular response to stimulus	GO:0051716	2.83168e-05	FBgn0000017,FBgn0000038,FBgn0000253,FBgn0000259,FBgn0000273,FBgn0000308,FBgn0000448,FBgn0000479,FBgn0000490,FBgn0000535,FBgn0000546,FBgn0000568,FBgn0001078,FBgn0001122,FBgn0001139,FBgn0001235,FBgn0002723,FBgn0003165,FBgn0003209,FBgn0003218,FBgn0003380,FBgn0003463,FBgn0003896,FBgn0003997,FBgn0004168,FBgn0004198,FBgn0004244,FBgn0004369,FBgn0004370,FBgn0004435,FBgn0004569,FBgn0004635,FBgn0004858,FBg…
nucleoside metabolic process	GO:0009116	0.0194598	FBgn0000150,FBgn0000239,FBgn0003204,FBgn0014455,FBgn0031489,FBgn0034215,FBgn0034276,FBgn0035348,FBgn0035436,FBgn0036030,FBgn0036337,FBgn0038074,FBgn0038172,FBgn0039464,FBgn0041194																	regulation of transport	GO:0051049	3.00781e-05	FBgn0000017,FBgn0000044,FBgn0000253,FBgn0000535,FBgn0003380,FBgn0003386,FBgn0004242,FBgn0005586,FBgn0010300,FBgn0013343,FBgn0013759,FBgn0014010,FBgn0027556,FBgn0028400,FBgn0029939,FBgn0030505,FBgn0030897,FBgn0031294,FBgn0032901,FBgn0035505,FBgn0040697,FBgn0041605,FBgn0083228,FBgn0085426,FBgn0086913,FBgn0250823,FBgn0259168,FBgn0260499,FBgn0261612,FBgn0262738,FBgn0262740,FBgn0263257,FBgn0263397,FBg…
ribosomal small subunit biogenesis	GO:0042274	0.0194598	FBgn0003517,FBgn0005533,FBgn0015393,FBgn0015521,FBgn0029714,FBgn0030177,FBgn0033454,FBgn0034743,FBgn0036686,FBgn0037073,FBgn0037529,FBgn0039300,FBgn0039713,FBgn0086451,FBgn0261592																	supramolecular fiber organization	GO:0097435	3.07899e-05	FBgn0000017,FBgn0000308,FBgn0002773,FBgn0003475,FBgn0004117,FBgn0004169,FBgn0004876,FBgn0005666,FBgn0011760,FBgn0024238,FBgn0025391,FBgn0026084,FBgn0026620,FBgn0034072,FBgn0039532,FBgn0039897,FBgn0051363,FBgn0063485,FBgn0086758,FBgn0250823,FBgn0259733,FBgn0261822,FBgn0261836,FBgn0263391,FBgn0263456,FBgn0263929,FBgn0264491,FBgn0265991,FBgn0266521
single-organism cellular process	GO:0044763	0.0194729	FBgn0000052,FBgn0000053,FBgn0000055,FBgn0000100,FBgn0000150,FBgn0000239,FBgn0000330,FBgn0000447,FBgn0000477,FBgn0000504,FBgn0000536,FBgn0000565,FBgn0000566,FBgn0000592,FBgn0000615,FBgn0000964,FBgn0000996,FBgn0001092,FBgn0001114,FBgn0001124,FBgn0001125,FBgn0001187,FBgn0001208,FBgn0001220,FBgn0001248,FBgn0001258,FBgn0002022,FBgn0002069,FBgn0002565,FBgn0002590,FBgn0002622,FBgn0002626,FBgn0002719,FBg…																	actin cytoskeleton organization	GO:0030036	3.16154e-05	FBgn0000017,FBgn0000308,FBgn0001122,FBgn0002773,FBgn0003475,FBgn0004117,FBgn0004169,FBgn0004876,FBgn0005666,FBgn0011760,FBgn0024189,FBgn0024238,FBgn0025391,FBgn0026084,FBgn0034072,FBgn0039532,FBgn0039897,FBgn0052264,FBgn0063485,FBgn0086758,FBgn0243512,FBgn0250823,FBgn0259733,FBgn0260799,FBgn0261822,FBgn0261836,FBgn0263391,FBgn0263456,FBgn0263929,FBgn0264491,FBgn0265935,FBgn0265991
cellular response to extracellular stimulus	GO:0031668	0.0221122	FBgn0003062,FBgn0011824,FBgn0020909,FBgn0023542,FBgn0026196,FBgn0029148,FBgn0029714,FBgn0030177,FBgn0033247,FBgn0033454,FBgn0033624,FBgn0034110,FBgn0034140,FBgn0035850,FBgn0036187,FBgn0036686,FBgn0038074,FBgn0038146,FBgn0038473,FBgn0038964,FBgn0044452,FBgn0086451																	regulation of nervous system development	GO:0051960	3.16668e-05	FBgn0000017,FBgn0000308,FBgn0000546,FBgn0001122,FBgn0001235,FBgn0003165,FBgn0004102,FBgn0004395,FBgn0004569,FBgn0004595,FBgn0004876,FBgn0010113,FBgn0010300,FBgn0010415,FBgn0010473,FBgn0011259,FBgn0011760,FBgn0011817,FBgn0013759,FBgn0015609,FBgn0015774,FBgn0023215,FBgn0026375,FBgn0034720,FBgn0034789,FBgn0038063,FBgn0038980,FBgn0085391,FBgn0085409,FBgn0086680,FBgn0259168,FBgn0259176,FBgn0260964,FBg…
polysaccharide metabolic process	GO:0005976	0.0228098	FBgn0003076,FBgn0020251,FBgn0033246,FBgn0034110,FBgn0034618,FBgn0035850,FBgn0035978,FBgn0044452,FBgn0053138,FBgn0283427																	imaginal disc-derived wing morphogenesis	GO:0007476	3.47081e-05	FBgn0000179,FBgn0000273,FBgn0000289,FBgn0000489,FBgn0000490,FBgn0000546,FBgn0001122,FBgn0001235,FBgn0003463,FBgn0004198,FBgn0004395,FBgn0004569,FBgn0004635,FBgn0010313,FBgn0010825,FBgn0011224,FBgn0011760,FBgn0011817,FBgn0016977,FBgn0020521,FBgn0034072,FBgn0035719,FBgn0036844,FBgn0039257,FBgn0039532,FBgn0052062,FBgn0085432,FBgn0086898,FBgn0263102,FBgn0263930,FBgn0264442,FBgn0264491,FBgn0285917
cellular polysaccharide metabolic process	GO:0044264	0.0228098	FBgn0003076,FBgn0020251,FBgn0033246,FBgn0034110,FBgn0034618,FBgn0035850,FBgn0035978,FBgn0044452,FBgn0053138,FBgn0283427																	regulation of macromolecule metabolic process	GO:0060255	3.47314e-05	FBgn0000179,FBgn0000259,FBgn0000273,FBgn0000289,FBgn0000439,FBgn0000448,FBgn0000490,FBgn0000546,FBgn0000568,FBgn0000659,FBgn0000810,FBgn0001078,FBgn0001138,FBgn0001139,FBgn0001235,FBgn0001323,FBgn0001994,FBgn0002521,FBgn0002723,FBgn0003165,FBgn0003209,FBgn0003463,FBgn0003896,FBgn0003997,FBgn0004102,FBgn0004198,FBgn0004595,FBgn0004618,FBgn0004635,FBgn0004795,FBgn0004838,FBgn0004858,FBgn0004865,FBg…
NADP metabolic process	GO:0006739	0.025021	FBgn0004057,FBgn0004654,FBgn0023477,FBgn0030239,FBgn0033373,FBgn0050499																	actin filament-based process	GO:0030029	3.72805e-05	FBgn0000017,FBgn0000253,FBgn0000308,FBgn0001122,FBgn0002773,FBgn0003475,FBgn0004117,FBgn0004169,FBgn0004876,FBgn0005666,FBgn0011760,FBgn0024189,FBgn0024238,FBgn0025391,FBgn0026084,FBgn0034072,FBgn0039532,FBgn0039897,FBgn0052264,FBgn0063485,FBgn0086758,FBgn0243512,FBgn0250823,FBgn0259733,FBgn0260799,FBgn0261822,FBgn0261836,FBgn0263391,FBgn0263456,FBgn0263929,FBgn0264491,FBgn0265935,FBgn0265991
generation of precursor metabolites and energy	GO:0006091	0.0251302	FBgn0001092,FBgn0001187,FBgn0001248,FBgn0003074,FBgn0003076,FBgn0010516,FBgn0019957,FBgn0022160,FBgn0023507,FBgn0026428,FBgn0027572,FBgn0027621,FBgn0028336,FBgn0028646,FBgn0030612,FBgn0031717,FBgn0032833,FBgn0033246,FBgn0034110,FBgn0034618,FBgn0035850,FBgn0035978,FBgn0037001,FBgn0037643,FBgn0039697,FBgn0039827,FBgn0044452,FBgn0053138,FBgn0086355,FBgn0250814,FBgn0250906,FBgn0262782,FBgn0283427																	response to light stimulus	GO:0009416	4.03864e-05	FBgn0000253,FBgn0003218,FBgn0003380,FBgn0003423,FBgn0003997,FBgn0004435,FBgn0004575,FBgn0004618,FBgn0005614,FBgn0010415,FBgn0011582,FBgn0013995,FBgn0023178,FBgn0033438,FBgn0034789,FBgn0036260,FBgn0085387,FBgn0086778,FBgn0259168,FBgn0259918,FBgn0262738,FBgn0263397,FBgn0267252
glyceraldehyde-3-phosphate metabolic process	GO:0019682	0.0256898	FBgn0004654,FBgn0023477,FBgn0030239,FBgn0050499,FBgn0086355																	salivary gland development	GO:0007431	4.09525e-05	FBgn0000253,FBgn0000276,FBgn0000308,FBgn0000490,FBgn0000546,FBgn0000633,FBgn0000659,FBgn0001235,FBgn0003209,FBgn0003997,FBgn0004635,FBgn0004795,FBgn0004910,FBgn0010113,FBgn0011760,FBgn0015774,FBgn0022238,FBgn0027932,FBgn0035497,FBgn0039532,FBgn0039685,FBgn0085407,FBgn0085432,FBgn0086677,FBgn0259176,FBgn0261793
neutral lipid biosynthetic process	GO:0046460	0.0256898	FBgn0004797,FBgn0033246,FBgn0053120,FBgn0263593,FBgn0283427																	exocrine system development	GO:0035272	4.09525e-05	FBgn0000253,FBgn0000276,FBgn0000308,FBgn0000490,FBgn0000546,FBgn0000633,FBgn0000659,FBgn0001235,FBgn0003209,FBgn0003997,FBgn0004635,FBgn0004795,FBgn0004910,FBgn0010113,FBgn0011760,FBgn0015774,FBgn0022238,FBgn0027932,FBgn0035497,FBgn0039532,FBgn0039685,FBgn0085407,FBgn0085432,FBgn0086677,FBgn0259176,FBgn0261793
acylglycerol biosynthetic process	GO:0046463	0.0256898	FBgn0004797,FBgn0033246,FBgn0053120,FBgn0263593,FBgn0283427																	regulation of signal transduction	GO:0009966	4.17164e-05	FBgn0000253,FBgn0000273,FBgn0000479,FBgn0000490,FBgn0001122,FBgn0001139,FBgn0001235,FBgn0003165,FBgn0003209,FBgn0003218,FBgn0003463,FBgn0004168,FBgn0004198,FBgn0004435,FBgn0004569,FBgn0004635,FBgn0004876,FBgn0004957,FBgn0010825,FBgn0011582,FBgn0011817,FBgn0014135,FBgn0015024,FBgn0015399,FBgn0015400,FBgn0016977,FBgn0020767,FBgn0024941,FBgn0027492,FBgn0027932,FBgn0028582,FBgn0029082,FBgn0029791,FBg…
rRNA modification	GO:0000154	0.0257586	FBgn0003062,FBgn0011824,FBgn0026196,FBgn0029148,FBgn0029714,FBgn0030720,FBgn0033741,FBgn0037137,FBgn0038964																	regulation of circadian rhythm	GO:0042752	4.17351e-05	FBgn0000273,FBgn0000546,FBgn0003380,FBgn0003997,FBgn0004168,FBgn0004244,FBgn0004618,FBgn0023178,FBgn0026086,FBgn0032048,FBgn0040382,FBgn0260499,FBgn0262738,FBgn0263397,FBgn0265784
regulation of lipid storage	GO:0010883	0.0257586	FBgn0004797,FBgn0008635,FBgn0025615,FBgn0025724,FBgn0025725,FBgn0028969,FBgn0036449,FBgn0040512,FBgn0263120																	wing disc development	GO:0035220	4.906e-05	FBgn0000179,FBgn0000273,FBgn0000289,FBgn0000489,FBgn0000490,FBgn0000546,FBgn0001122,FBgn0001235,FBgn0003463,FBgn0003896,FBgn0004198,FBgn0004395,FBgn0004569,FBgn0004635,FBgn0004858,FBgn0005626,FBgn0010313,FBgn0010825,FBgn0011224,FBgn0011481,FBgn0011760,FBgn0011817,FBgn0014010,FBgn0016977,FBgn0020521,FBgn0023083,FBgn0034072,FBgn0035719,FBgn0036814,FBgn0036844,FBgn0038294,FBgn0039257,FBgn0039532,FBg…
purine nucleoside monophosphate biosynthetic process	GO:0009127	0.0262809	FBgn0000052,FBgn0000053,FBgn0000239,FBgn0010217,FBgn0010516,FBgn0016691,FBgn0019644,FBgn0020235,FBgn0020513,FBgn0027493,FBgn0036337,FBgn0038467,FBgn0039697																	cell-cell adhesion via plasma-membrane adhesion molecules	GO:0098742	4.98066e-05	FBgn0000636,FBgn0003285,FBgn0005775,FBgn0010238,FBgn0015229,FBgn0015609,FBgn0017590,FBgn0024189,FBgn0028369,FBgn0029082,FBgn0038498,FBgn0039584,FBgn0053179,FBgn0265296
purine ribonucleoside monophosphate biosynthetic process	GO:0009168	0.0262809	FBgn0000052,FBgn0000053,FBgn0000239,FBgn0010217,FBgn0010516,FBgn0016691,FBgn0019644,FBgn0020235,FBgn0020513,FBgn0027493,FBgn0036337,FBgn0038467,FBgn0039697																	regulation of nucleic acid-templated transcription	GO:1903506	5.01253e-05	FBgn0000179,FBgn0000273,FBgn0000289,FBgn0000439,FBgn0000448,FBgn0000490,FBgn0000546,FBgn0000568,FBgn0000659,FBgn0001078,FBgn0001138,FBgn0001139,FBgn0001235,FBgn0001323,FBgn0001994,FBgn0002521,FBgn0002723,FBgn0003165,FBgn0003463,FBgn0003896,FBgn0004102,FBgn0004198,FBgn0004595,FBgn0004618,FBgn0004795,FBgn0004865,FBgn0004880,FBgn0010313,FBgn0010825,FBgn0011481,FBgn0011766,FBgn0013799,FBgn0015664,FBg…
regulation of lipid localization	GO:1905952	0.0278421	FBgn0004797,FBgn0008635,FBgn0025615,FBgn0025724,FBgn0025725,FBgn0028969,FBgn0032136,FBgn0036449,FBgn0040512,FBgn0263120																	regulation of RNA biosynthetic process	GO:2001141	5.01253e-05	FBgn0000179,FBgn0000273,FBgn0000289,FBgn0000439,FBgn0000448,FBgn0000490,FBgn0000546,FBgn0000568,FBgn0000659,FBgn0001078,FBgn0001138,FBgn0001139,FBgn0001235,FBgn0001323,FBgn0001994,FBgn0002521,FBgn0002723,FBgn0003165,FBgn0003463,FBgn0003896,FBgn0004102,FBgn0004198,FBgn0004595,FBgn0004618,FBgn0004795,FBgn0004865,FBgn0004880,FBgn0010313,FBgn0010825,FBgn0011481,FBgn0011766,FBgn0013799,FBgn0015664,FBg…
ribosomal large subunit assembly	GO:0000027	0.0282707	FBgn0013325,FBgn0024733,FBgn0026372,FBgn0032518,FBgn0034968,FBgn0037899,FBgn0064225																	cell fate commitment	GO:0045165	5.39744e-05	FBgn0000253,FBgn0000479,FBgn0000490,FBgn0000546,FBgn0000633,FBgn0001139,FBgn0001235,FBgn0001323,FBgn0001404,FBgn0003285,FBgn0003896,FBgn0004102,FBgn0004569,FBgn0004595,FBgn0004618,FBgn0004635,FBgn0004838,FBgn0004858,FBgn0004876,FBgn0010113,FBgn0010300,FBgn0010473,FBgn0011206,FBgn0011666,FBgn0013759,FBgn0016977,FBgn0017590,FBgn0025726,FBgn0028582,FBgn0033438,FBgn0033988,FBgn0035023,FBgn0051140,FBg…
ribonucleoside monophosphate biosynthetic process	GO:0009156	0.028334	FBgn0000052,FBgn0000053,FBgn0000239,FBgn0010217,FBgn0010516,FBgn0016691,FBgn0019644,FBgn0020235,FBgn0020513,FBgn0027493,FBgn0036030,FBgn0036337,FBgn0038467,FBgn0039697																	regulation of behavior	GO:0050795	5.60349e-05	FBgn0000273,FBgn0000546,FBgn0001404,FBgn0003380,FBgn0004168,FBgn0004244,FBgn0011582,FBgn0015872,FBgn0023178,FBgn0032048,FBgn0038839,FBgn0040505,FBgn0259168,FBgn0260499,FBgn0262739,FBgn0263397,FBgn0265784
'de novo' IMP biosynthetic process	GO:0006189	0.0319005	FBgn0000052,FBgn0000053,FBgn0020513																	circadian behavior	GO:0048512	5.60475e-05	FBgn0000259,FBgn0000273,FBgn0000479,FBgn0000546,FBgn0003380,FBgn0004168,FBgn0004244,FBgn0022382,FBgn0023178,FBgn0026086,FBgn0027109,FBgn0032048,FBgn0035023,FBgn0053988,FBgn0260499,FBgn0263397,FBgn0264006,FBgn0265784
L-serine biosynthetic process	GO:0006564	0.0319005	FBgn0014427,FBgn0023129,FBgn0029823																	cellular component organization or biogenesis	GO:0071840	5.61511e-05	FBgn0000017,FBgn0000044,FBgn0000046,FBgn0000108,FBgn0000253,FBgn0000273,FBgn0000276,FBgn0000308,FBgn0000479,FBgn0000490,FBgn0000535,FBgn0000546,FBgn0000636,FBgn0000659,FBgn0000810,FBgn0001078,FBgn0001122,FBgn0001138,FBgn0001139,FBgn0001142,FBgn0001323,FBgn0001404,FBgn0002306,FBgn0002521,FBgn0002773,FBgn0002921,FBgn0003165,FBgn0003209,FBgn0003227,FBgn0003285,FBgn0003380,FBgn0003386,FBgn0003435,FBg…
10-formyltetrahydrofolate metabolic process	GO:0009256	0.0319005	FBgn0010222,FBgn0020385,FBgn0032945																	motor neuron axon guidance	GO:0008045	5.86363e-05	FBgn0000017,FBgn0001138,FBgn0003896,FBgn0004369,FBgn0004370,FBgn0010415,FBgn0011259,FBgn0015774,FBgn0033438,FBgn0040271,FBgn0086680,FBgn0260660,FBgn0263930,FBgn0264975
glyoxylate metabolic process	GO:0046487	0.0319005	FBgn0001248,FBgn0011770,FBgn0014031																	negative regulation of nitrogen compound metabolic process	GO:0051172	5.91171e-05	FBgn0000179,FBgn0000439,FBgn0000448,FBgn0000546,FBgn0000568,FBgn0000659,FBgn0000810,FBgn0001139,FBgn0001323,FBgn0002521,FBgn0003165,FBgn0003209,FBgn0004102,FBgn0004168,FBgn0004198,FBgn0004595,FBgn0004795,FBgn0004838,FBgn0004865,FBgn0004880,FBgn0010300,FBgn0010313,FBgn0010415,FBgn0010825,FBgn0011224,FBgn0011666,FBgn0011766,FBgn0015399,FBgn0022238,FBgn0023215,FBgn0024244,FBgn0026086,FBgn0026411,FBg…
response to mercury ion	GO:0046689	0.0319005	FBgn0025454,FBgn0028396,FBgn0262146																	salivary gland morphogenesis	GO:0007435	5.91366e-05	FBgn0000253,FBgn0000276,FBgn0000308,FBgn0000546,FBgn0000633,FBgn0000659,FBgn0003209,FBgn0003997,FBgn0004635,FBgn0004795,FBgn0004910,FBgn0010113,FBgn0011760,FBgn0022238,FBgn0027932,FBgn0035497,FBgn0039532,FBgn0039685,FBgn0085407,FBgn0085432,FBgn0086677,FBgn0259176,FBgn0261793
protein ufmylation	GO:0071569	0.0319005	FBgn0030305,FBgn0034061,FBgn0085220																	gland morphogenesis	GO:0022612	5.91366e-05	FBgn0000253,FBgn0000276,FBgn0000308,FBgn0000546,FBgn0000633,FBgn0000659,FBgn0003209,FBgn0003997,FBgn0004635,FBgn0004795,FBgn0004910,FBgn0010113,FBgn0011760,FBgn0022238,FBgn0027932,FBgn0035497,FBgn0039532,FBgn0039685,FBgn0085407,FBgn0085432,FBgn0086677,FBgn0259176,FBgn0261793
nucleoside monophosphate biosynthetic process	GO:0009124	0.0326265	FBgn0000052,FBgn0000053,FBgn0000239,FBgn0010217,FBgn0010516,FBgn0016691,FBgn0019644,FBgn0020235,FBgn0020513,FBgn0027493,FBgn0036030,FBgn0036337,FBgn0038467,FBgn0039697																	wing disc morphogenesis	GO:0007472	5.92449e-05	FBgn0000179,FBgn0000273,FBgn0000289,FBgn0000489,FBgn0000490,FBgn0000546,FBgn0001122,FBgn0001235,FBgn0003463,FBgn0004198,FBgn0004395,FBgn0004569,FBgn0004635,FBgn0010313,FBgn0010825,FBgn0011224,FBgn0011760,FBgn0011817,FBgn0016977,FBgn0020521,FBgn0034072,FBgn0035719,FBgn0036844,FBgn0039257,FBgn0039532,FBgn0052062,FBgn0085432,FBgn0086898,FBgn0263102,FBgn0263930,FBgn0264442,FBgn0264491,FBgn0285917
cellular carbohydrate metabolic process	GO:0044262	0.0351873	FBgn0001187,FBgn0001248,FBgn0003076,FBgn0003507,FBgn0003731,FBgn0003748,FBgn0004654,FBgn0010217,FBgn0019957,FBgn0020236,FBgn0020251,FBgn0020306,FBgn0021872,FBgn0022160,FBgn0025592,FBgn0027550,FBgn0027560,FBgn0027621,FBgn0031907,FBgn0032820,FBgn0032940,FBgn0033246,FBgn0034110,FBgn0034618,FBgn0035266,FBgn0035850,FBgn0035978,FBgn0036046,FBgn0036262,FBgn0038463,FBgn0040309,FBgn0044048,FBgn0044452,FBg…																	regulation of transcription, DNA-templated	GO:0006355	5.94142e-05	FBgn0000179,FBgn0000273,FBgn0000289,FBgn0000439,FBgn0000448,FBgn0000490,FBgn0000546,FBgn0000568,FBgn0000659,FBgn0001078,FBgn0001138,FBgn0001139,FBgn0001235,FBgn0001323,FBgn0001994,FBgn0002521,FBgn0002723,FBgn0003165,FBgn0003463,FBgn0003896,FBgn0004102,FBgn0004198,FBgn0004595,FBgn0004618,FBgn0004795,FBgn0004865,FBgn0004880,FBgn0010313,FBgn0010825,FBgn0011481,FBgn0011766,FBgn0013799,FBgn0015664,FBg…
pyrimidine nucleobase metabolic process	GO:0006206	0.0355079	FBgn0000447,FBgn0003189,FBgn0003308,FBgn0023537,FBgn0037513,FBgn0086450																	muscle cell differentiation	GO:0042692	7.8875e-05	FBgn0000044,FBgn0002773,FBgn0003285,FBgn0003896,FBgn0004117,FBgn0004169,FBgn0005666,FBgn0020269,FBgn0024189,FBgn0025391,FBgn0028369,FBgn0029082,FBgn0033988,FBgn0034072,FBgn0063485,FBgn0086677,FBgn0261822,FBgn0263391,FBgn0264491,FBgn0265991
glucose 6-phosphate metabolic process	GO:0051156	0.0355079	FBgn0001187,FBgn0004057,FBgn0004654,FBgn0023477,FBgn0030239,FBgn0050499																	neuron recognition	GO:0008038	8.21306e-05	FBgn0000017,FBgn0000636,FBgn0004108,FBgn0004369,FBgn0004435,FBgn0005775,FBgn0010473,FBgn0011259,FBgn0015609,FBgn0015774,FBgn0026375,FBgn0033438,FBgn0040271,FBgn0041097,FBgn0085407,FBgn0262509,FBgn0264273,FBgn0264442
establishment of protein localization to membrane	GO:0090150	0.0355719	FBgn0010391,FBgn0010638,FBgn0010747,FBgn0011016,FBgn0025700,FBgn0028327,FBgn0035088,FBgn0035771,FBgn0035947,FBgn0038810,FBgn0038947,FBgn0083968,FBgn0262125																	synaptic growth at neuromuscular junction	GO:0051124	8.75687e-05	FBgn0000017,FBgn0001122,FBgn0002921,FBgn0003165,FBgn0004575,FBgn0010300,FBgn0010415,FBgn0011817,FBgn0013759,FBgn0020386,FBgn0034720,FBgn0034789,FBgn0038063,FBgn0038980,FBgn0040752,FBgn0041605,FBgn0086677,FBgn0259168,FBgn0263456,FBgn0264006,FBgn0266521
protein exit from endoplasmic reticulum	GO:0032527	0.0356088	FBgn0029709,FBgn0032398,FBgn0038947,FBgn0069242																	regulation of cell morphogenesis	GO:0022604	9.40543e-05	FBgn0000017,FBgn0000308,FBgn0000490,FBgn0001122,FBgn0002921,FBgn0003209,FBgn0004595,FBgn0010473,FBgn0011259,FBgn0015024,FBgn0015609,FBgn0015774,FBgn0023215,FBgn0026375,FBgn0039532,FBgn0039908,FBgn0085391,FBgn0085409,FBgn0086680,FBgn0250823,FBgn0259211,FBgn0264953
tRNA metabolic process	GO:0006399	0.0357781	FBgn0002069,FBgn0003062,FBgn0005674,FBgn0021765,FBgn0026079,FBgn0027079,FBgn0027080,FBgn0027081,FBgn0027084,FBgn0027086,FBgn0027087,FBgn0027088,FBgn0027090,FBgn0027091,FBgn0027093,FBgn0027094,FBgn0028426,FBgn0031497,FBgn0034401,FBgn0037926,FBgn0038893,FBgn0086443																	muscle organ development	GO:0007517	9.76226e-05	FBgn0000044,FBgn0000490,FBgn0000546,FBgn0003285,FBgn0004169,FBgn0004795,FBgn0024189,FBgn0025391,FBgn0028369,FBgn0029082,FBgn0031850,FBgn0033988,FBgn0034072,FBgn0040505,FBgn0085369,FBgn0086677,FBgn0259745,FBgn0261836,FBgn0264442,FBgn0264491,FBgn0265487
response to starvation	GO:0042594	0.0358752	FBgn0003062,FBgn0004852,FBgn0011824,FBgn0020909,FBgn0023542,FBgn0026196,FBgn0028479,FBgn0028956,FBgn0029148,FBgn0029714,FBgn0030177,FBgn0033247,FBgn0033454,FBgn0033624,FBgn0034110,FBgn0034140,FBgn0035850,FBgn0036187,FBgn0036686,FBgn0038074,FBgn0038146,FBgn0038473,FBgn0038964,FBgn0040309,FBgn0044452,FBgn0086451,FBgn0086687,FBgn0261862,FBgn0263593																	synaptic vesicle transport	GO:0048489	9.88537e-05	FBgn0004242,FBgn0004575,FBgn0005586,FBgn0010300,FBgn0011288,FBgn0013342,FBgn0013343,FBgn0013759,FBgn0014010,FBgn0025726,FBgn0028400,FBgn0028582,FBgn0030505,FBgn0032901,FBgn0035756,FBgn0038659,FBgn0041605,FBgn0053547,FBgn0083963,FBgn0259168
[truncated: 425 more rows]

## Sheet: 1MG_VBer
Induced by Mating																				Repressed by mating
Biological Process				Cellular Component				Molecular Function				Protein Domain Enrichment				Pathway Enrichment				Biological Process				Cellular Component				Molecular Function				Protein Domain Enrichment				Pathway Enrichment
[truncated: 90 more rows]

## Sheet: 1MN_VBer
Induced by Mating																				Repressed by mating
[truncated: 76 more rows]

## Sheet: 3MG_VBer
Induced by Mating																				Repressed by mating
[truncated: 36 more rows]

[truncated: 1 more sheets: 3MN_VBer]
