# Supplementary material
Source: publisher figshare collection journal article supplement (https://gsajournals.figshare.com/articles/dataset/_/11317307)
Supplement: Supplementary file 1 [file 1 › TableS5_ANOVA_TukeyHSD_Results.xlsx]

## Sheet: README
All statistical analysis were performed in JMP® Pro 14.0.0
Tabs indicate the corresponding Figure.
Berlin and tud/+ females were considered separately for statistical analysis
Tab:	Behavior/Experiment
Avg. sleep per individual day	Average daytime sleep per individual fly
Avg. sleep per individual night	Average nighttime sleep per individual fly
ANOVA Sleep results	Summary of ANOVA sleep
FigS5A_Day	Daytime sleep across wild-type strains
FigS5B_Night	Nighttime sleep across wild-type strains
Fig4A_Day	Daytime sleep
Fig4B_Night	Nighttime sleep
Re-mating Results	Percent re-mating for each vial group
ANOVA Summary Re-mating Results	Summary of ANOVA re-mating
Fig4D	Re-mating

## Sheet:  Avg. sleep per individual day
Condition	Light_status	mean_sleep_per_ind
Virgin Berlin	Day	0.128333
Virgin Berlin	Day	0.366
Virgin Berlin	Day	0.330333
Virgin Berlin	Day	0.229333
Virgin Berlin	Day	0.047
Virgin Berlin	Day	0.121333
Virgin Berlin	Day	0.053
Virgin Berlin	Day	0.0613333
Virgin Berlin	Day	0.0763333
Virgin Berlin	Day	0.129667
Virgin Berlin	Day	0.116
Virgin Berlin	Day	0.0666667
Virgin Berlin	Day	0.204667
Virgin Berlin	Day	0.0986667
Virgin Berlin	Day	0.348
Virgin Berlin	Day	0.0223333
Virgin Berlin	Day	0.148
Virgin Berlin	Day	0.0786667
Virgin Berlin	Day	0.0533333
Virgin Berlin	Day	0.119667
Virgin Berlin	Day	0.162667
Virgin Berlin	Day	0.415667
Virgin Berlin	Day	0.06
Virgin Berlin	Day	0.136333
Virgin Berlin	Day	0.096
Virgin Berlin	Day	0.172667
Virgin Berlin	Day	0.04
Virgin Berlin	Day	0.408
Virgin Berlin	Day	0.0383333
Virgin Berlin	Day	0.081
Virgin Berlin	Day	0.108
Virgin Berlin	Day	0.0716667
Virgin Berlin	Day	0.0876667
Virgin Berlin	Day	0.148
Virgin Berlin	Day	0.129333
Virgin Berlin	Day	0.0656667
Virgin Berlin	Day	0.0523333
Virgin Berlin	Day	0.153
Virgin Berlin	Day	0.259667
Virgin Berlin	Day	0.321667
Virgin Berlin	Day	0.183667
Virgin Berlin	Day	0.154333
Virgin Berlin	Day	0.0383333
Virgin Berlin	Day	0.298333
Virgin Berlin	Day	0.208
Virgin Berlin	Day	0.282333
Virgin Berlin	Day	0.244667
Virgin Berlin	Day	0.183
Virgin Berlin	Day	0.272667
Virgin Berlin	Day	0.153
Virgin Berlin	Day	0.087
Virgin Berlin	Day	0.021
Virgin Berlin	Day	0.144
Virgin Berlin	Day	0.185333
Virgin Berlin	Day	0.0473333
Virgin Berlin	Day	0.200667
Virgin Berlin	Day	0.407
Virgin Berlin	Day	0.0853333
Virgin Berlin	Day	0.0953333
Virgin Berlin	Day	0.301
Virgin Berlin	Day	0.178333
Virgin Berlin	Day	0.098
Virgin Berlin	Day	0.120333
Virgin Berlin	Day	0.197
Virgin Berlin	Day	0.0106667
Virgin Berlin	Day	0.144333
Virgin Berlin	Day	0.238667
Virgin Berlin	Day	0.335333
Virgin Berlin	Day	0.342
Virgin Berlin	Day	0.128
tud/+ no germline mated to Berlin male	Day	0.322333
tud/+ no germline mated to Berlin male	Day	0.331
tud/+ no germline mated to Berlin male	Day	0.316333
tud/+ no germline mated to Berlin male	Day	0.098
tud/+ no germline mated to Berlin male	Day	0.206333
tud/+ no germline mated to Berlin male	Day	0.422667
tud/+ no germline mated to Berlin male	Day	0.207
tud/+ no germline mated to Berlin male	Day	0.371333
tud/+ no germline mated to Berlin male	Day	0.355
tud/+ no germline mated to Berlin male	Day	0.327
tud/+ no germline mated to Berlin male	Day	0.523667
tud/+ no germline mated to Berlin male	Day	0.439333
tud/+ no germline mated to Berlin male	Day	0.106333
tud/+ no germline mated to Berlin male	Day	0.378333
tud/+ no germline mated to Berlin male	Day	0.389
tud/+ no germline mated to Berlin male	Day	0.55
tud/+ no germline mated to Berlin male	Day	0.260333
tud/+ no germline mated to Berlin male	Day	0.274
tud/+ no germline mated to Berlin male	Day	0.415667
tud/+ no germline mated to Berlin male	Day	0.557
tud/+ no germline mated to Berlin male	Day	0.599333
tud/+ no germline mated to Berlin male	Day	0.446667
tud/+ no germline mated to Berlin male	Day	0.134333
tud/+ no germline mated to Berlin male	Day	0.300333
tud/+ no germline mated to Berlin male	Day	0.320667
tud/+ no germline mated to Berlin male	Day	0.204333
tud/+ no germline mated to Berlin male	Day	0.344667
tud/+ no germline mated to Berlin male	Day	0.201
tud/+ no germline mated to Berlin male	Day	0.350333
tud/+ no germline mated to Berlin male	Day	0.497
tud/+ no germline mated to Berlin male	Day	0.100333
tud/+ no germline mated to Berlin male	Day	0.421
tud/+ no germline mated to Berlin male	Day	0.167
tud/+ no germline mated to Berlin male	Day	0.235667
tud/+ no germline mated to Berlin male	Day	0.299333
tud/+ no germline mated to Berlin male	Day	0.479
tud/+ no germline mated to Berlin male	Day	0.385333
tud/+ no germline mated to Berlin male	Day	0.191667
tud/+ no germline mated to Berlin male	Day	0.252333
tud/+ no germline mated to Berlin male	Day	0.158667
tud/+ no germline mated to Berlin male	Day	0.29
tud/+ no germline mated to Berlin male	Day	0.161333
tud/+ no germline mated to Berlin male	Day	0.461667
tud/+ no germline mated to Berlin male	Day	0.589333
tud/+ no germline mated to Berlin male	Day	0.324
tud/+ no germline mated to Berlin male	Day	0.124
tud/+ no germline mated to Berlin male	Day	0.516
tud/+ no germline mated to Berlin male	Day	0.128667
tud/+ no germline mated to Berlin male	Day	0.115667
tud/+ no germline mated to Berlin male	Day	0.489333
tud/+ no germline mated to Berlin male	Day	0.349667
tud/+ no germline mated to Berlin male	Day	0.277
tud/+ no germline mated to Berlin male	Day	0.438
tud/+ no germline mated to Berlin male	Day	0.111667
tud/+ no germline mated to Berlin male	Day	0.402333
tud/+ no germline mated to Berlin male	Day	0.160667
tud/+ no germline mated to Berlin male	Day	0.409667
tud/+ no germline mated to Berlin male	Day	0.414333
tud/+ no germline mated to Berlin male	Day	0.41
tud/+ no germline mated to Berlin male	Day	0.389667
tud/+ no germline mated to Berlin male	Day	0.424667
tud/+ no germline mated to Berlin male	Day	0.388667
tud/+ no germline mated to Berlin male	Day	0.248333
tud/+ no germline mated to Berlin male	Day	0.460333
tud/+ no germline mated to Berlin male	Day	0.532
tud/+ no germline mated to Berlin male	Day	0.149333
tud/+ no germline mated to Berlin male	Day	0.53
tud/+ no germline mated to Berlin male	Day	0.352
tud/+ no germline mated to Berlin male	Day	0.315333
Berlin mated to tud/+ male with a germline	Day	0.303667
Berlin mated to tud/+ male with a germline	Day	0.0606667
Berlin mated to tud/+ male with a germline	Day	0.044
Berlin mated to tud/+ male with a germline	Day	0.217333
Berlin mated to tud/+ male with a germline	Day	0.356
Berlin mated to tud/+ male with a germline	Day	0.433667
Berlin mated to tud/+ male with a germline	Day	0.141333
Berlin mated to tud/+ male with a germline	Day	0.305667
Berlin mated to tud/+ male with a germline	Day	0.188667
Berlin mated to tud/+ male with a germline	Day	0.159
Berlin mated to tud/+ male with a germline	Day	0.0803333
Berlin mated to tud/+ male with a germline	Day	0.181333
Berlin mated to tud/+ male with a germline	Day	0.300667
Berlin mated to tud/+ male with a germline	Day	0.312
Berlin mated to tud/+ male with a germline	Day	0.273667
Berlin mated to tud/+ male with a germline	Day	0.233333
Berlin mated to tud/+ male with a germline	Day	0.329333
Berlin mated to tud/+ male with a germline	Day	0.166333
Berlin mated to tud/+ male with a germline	Day	0.259667
Berlin mated to tud/+ male with a germline	Day	0.189
Berlin mated to tud/+ male with a germline	Day	0.272667
Berlin mated to tud/+ male with a germline	Day	0.171
Berlin mated to tud/+ male with a germline	Day	0.152333
Berlin mated to tud/+ male with a germline	Day	0.354333
Berlin mated to tud/+ male with a germline	Day	0.0273333
Berlin mated to tud/+ male with a germline	Day	0.143
Berlin mated to tud/+ male with a germline	Day	0.185333
Berlin mated to tud/+ male with a germline	Day	0.237
Berlin mated to tud/+ male with a germline	Day	0.0986667
Berlin mated to tud/+ male with a germline	Day	0.157667
Berlin mated to tud/+ male with a germline	Day	0.135667
Berlin mated to tud/+ male with a germline	Day	0.138333
Berlin mated to tud/+ male with a germline	Day	0.08
Berlin mated to tud/+ male with a germline	Day	0.520667
Berlin mated to tud/+ male with a germline	Day	0.25
Berlin mated to tud/+ male with a germline	Day	0.407
Berlin mated to tud/+ male with a germline	Day	0.122
Berlin mated to tud/+ male with a germline	Day	0.150667
Berlin mated to tud/+ male with a germline	Day	0.091
Berlin mated to tud/+ male with a germline	Day	0.362667
Berlin mated to tud/+ male with a germline	Day	0.168
Berlin mated to tud/+ male with a germline	Day	0.868333
Berlin mated to tud/+ male with a germline	Day	0.0896667
Berlin mated to tud/+ male with a germline	Day	0.491
Berlin mated to tud/+ male with a germline	Day	0.252667
Berlin mated to tud/+ male with a germline	Day	0.260333
Berlin mated to tud/+ male with a germline	Day	0.248
Berlin mated to tud/+ male with a germline	Day	0.254667
Berlin mated to tud/+ male with a germline	Day	0.138333
Berlin mated to tud/+ male with a germline	Day	0.142333
Berlin mated to tud/+ male with a germline	Day	0.519333
Berlin mated to tud/+ male with a germline	Day	0.108
Berlin mated to tud/+ male with a germline	Day	0.0503333
Berlin mated to tud/+ male with a germline	Day	0.276667
Berlin mated to tud/+ male with a germline	Day	0.146667
Berlin mated to tud/+ male with a germline	Day	0.185667
Berlin mated to tud/+ male with a germline	Day	0.0653333
Berlin mated to tud/+ male with a germline	Day	0.199
Berlin mated to tud/+ male with a germline	Day	0.018
Berlin mated to tud/+ male with a germline	Day	0.220333
Berlin mated to tud/+ male with a germline	Day	0.305667
Berlin mated to tud/+ male with a germline	Day	0.106333
Berlin mated to tud/+ male with a germline	Day	0.112
Berlin mated to tud/+ male with a germline	Day	0.115667
Berlin mated to tud/+ male with a germline	Day	0.217
Berlin mated to tud/+ male with a germline	Day	0.0896667
Berlin mated to tud/+ male with a germline	Day	0.611
Berlin mated to tud/+ male with a germline	Day	0.092
Virgin white Canton S	Day	0.456
Virgin white Canton S	Day	0.471667
Virgin white Canton S	Day	0.492
Virgin white Canton S	Day	0.548667
Virgin white Canton S	Day	0.441
Virgin white Canton S	Day	0.381
Virgin white Canton S	Day	0.580333
Virgin white Canton S	Day	0.669333
Virgin white Canton S	Day	0.451333
Virgin white Canton S	Day	0.258333
Virgin white Canton S	Day	0.404333
Virgin white Canton S	Day	0.375333
Virgin white Canton S	Day	0.547667
Virgin white Canton S	Day	0.468667
Virgin white Canton S	Day	0.202667
Virgin white Canton S	Day	0.490667
Virgin white Canton S	Day	0.472
Virgin white Canton S	Day	0.352333
Virgin white Canton S	Day	0.719
Virgin white Canton S	Day	0.620333
Virgin white Canton S	Day	0.51
Virgin white Canton S	Day	0.411667
Virgin white Canton S	Day	0.547333
Virgin white Canton S	Day	0.502667
Virgin white Canton S	Day	0.605667
Virgin white Canton S	Day	0.231333
Virgin white Canton S	Day	0.151333
Virgin white Canton S	Day	0.587667
Virgin white Canton S	Day	0.293
Virgin white Canton S	Day	0.22
Virgin white Canton S	Day	0.271
Virgin white Canton S	Day	0.557333
Virgin white Canton S	Day	0.309
Virgin white Canton S	Day	0.542333
Virgin white Canton S	Day	0.422333
Virgin white Canton S	Day	0.552
Virgin white Canton S	Day	0.497333
Virgin white Canton S	Day	0.523667
Virgin white Canton S	Day	0.523333
Virgin white Canton S	Day	0.455667
Virgin white Canton S	Day	0.322
Virgin white Canton S	Day	0.501
Virgin white Canton S	Day	0.512333
Virgin white Canton S	Day	0.249667
Virgin white Canton S	Day	0.169667
Virgin white Canton S	Day	0.404333
Virgin white Canton S	Day	0.447667
Virgin white Canton S	Day	0.530333
Virgin white Canton S	Day	0.707
Virgin white Canton S	Day	0.692333
Virgin white Canton S	Day	0.458
Virgin white Canton S	Day	0.438333
Virgin white Canton S	Day	0.226667
Virgin white Canton S	Day	0.336667
Virgin white Canton S	Day	0.414
Virgin white Canton S	Day	0.582
Virgin white Canton S	Day	0.417333
Virgin white Canton S	Day	0.426333
Virgin white Canton S	Day	0.450667
Virgin white Canton S	Day	0.476
Virgin white Canton S	Day	0.338
Virgin white Canton S	Day	0.387667
Virgin white Canton S	Day	0.198667
Virgin white Canton S	Day	0.398667
Virgin white Canton S	Day	0.323
Virgin white Canton S	Day	0.130667
Virgin white Canton S	Day	0.38
Virgin white Canton S	Day	0.551333
Virgin white Canton S	Day	0.631
Virgin white Canton S	Day	0.541
Berlin female mated to Berlin male	Day	0.108
Berlin female mated to Berlin male	Day	0.0526667
Berlin female mated to Berlin male	Day	0.126667
Berlin female mated to Berlin male	Day	0.0943333
Berlin female mated to Berlin male	Day	0.146333
Berlin female mated to Berlin male	Day	0.174667
Berlin female mated to Berlin male	Day	0.0963333
Berlin female mated to Berlin male	Day	0.236667
Berlin female mated to Berlin male	Day	0.225
Berlin female mated to Berlin male	Day	0.0473333
Berlin female mated to Berlin male	Day	0.145667
Berlin female mated to Berlin male	Day	0.308667
Berlin female mated to Berlin male	Day	0.110333
Berlin female mated to Berlin male	Day	0.063
Berlin female mated to Berlin male	Day	0.170667
Berlin female mated to Berlin male	Day	0.342667
Berlin female mated to Berlin male	Day	0.182
Berlin female mated to Berlin male	Day	0.186667
Berlin female mated to Berlin male	Day	0.105333
Berlin female mated to Berlin male	Day	0.323
Berlin female mated to Berlin male	Day	0.185667
Berlin female mated to Berlin male	Day	0.303
Berlin female mated to Berlin male	Day	0.215333
Berlin female mated to Berlin male	Day	0.283667
Berlin female mated to Berlin male	Day	0.17
Berlin female mated to Berlin male	Day	0.202667
Berlin female mated to Berlin male	Day	0.282333
Berlin female mated to Berlin male	Day	0.086
Berlin female mated to Berlin male	Day	0.167667
Berlin female mated to Berlin male	Day	0.239667
Berlin female mated to Berlin male	Day	0.100667
Berlin female mated to Berlin male	Day	0.135667
Berlin female mated to Berlin male	Day	0.262
Berlin female mated to Berlin male	Day	0.331
Berlin female mated to Berlin male	Day	0.355667
Berlin female mated to Berlin male	Day	0.0643333
Berlin female mated to Berlin male	Day	0.235333
Berlin female mated to Berlin male	Day	0.202333
Berlin female mated to Berlin male	Day	0.256667
Berlin female mated to Berlin male	Day	0.125333
Berlin female mated to Berlin male	Day	0.258
Berlin female mated to Berlin male	Day	0.114
Berlin female mated to Berlin male	Day	0.300667
Berlin female mated to Berlin male	Day	0.236667
Berlin female mated to Berlin male	Day	0.331
Berlin female mated to Berlin male	Day	0.116333
Berlin female mated to Berlin male	Day	0.183667
Berlin female mated to Berlin male	Day	0.349333
Berlin female mated to Berlin male	Day	0.216667
Berlin female mated to Berlin male	Day	0.171667
Berlin female mated to Berlin male	Day	0.136667
Berlin female mated to Berlin male	Day	0.374
Berlin female mated to Berlin male	Day	0.374
Berlin female mated to Berlin male	Day	0.562
Berlin female mated to Berlin male	Day	0.217333
Berlin female mated to Berlin male	Day	0.296667
Berlin female mated to Berlin male	Day	0.142
Berlin female mated to Berlin male	Day	0.361
Berlin female mated to Berlin male	Day	0.291
Berlin female mated to Berlin male	Day	0.506
Berlin female mated to Berlin male	Day	0.211333
Berlin female mated to Berlin male	Day	0.326333
Berlin female mated to Berlin male	Day	0.0813333
Berlin female mated to Berlin male	Day	0.253667
Berlin female mated to Berlin male	Day	0.1
Berlin female mated to Berlin male	Day	0.217
Berlin female mated to Berlin male	Day	0.177
Berlin female mated to Berlin male	Day	0.37
Virgin tud/+ female no germline	Day	0.219333
Virgin tud/+ female no germline	Day	0.263333
Virgin tud/+ female no germline	Day	0.286333
Virgin tud/+ female no germline	Day	0.405333
Virgin tud/+ female no germline	Day	0.292
Virgin tud/+ female no germline	Day	0.251333
Virgin tud/+ female no germline	Day	0.309
Virgin tud/+ female no germline	Day	0.0876667
Virgin tud/+ female no germline	Day	0.279667
Virgin tud/+ female no germline	Day	0.199667
Virgin tud/+ female no germline	Day	0.237
Virgin tud/+ female no germline	Day	0.15
Virgin tud/+ female no germline	Day	0.236
Virgin tud/+ female no germline	Day	0.306333
Virgin tud/+ female no germline	Day	0.32
Virgin tud/+ female no germline	Day	0.234667
Virgin tud/+ female no germline	Day	0.399
Virgin tud/+ female no germline	Day	0.170667
Virgin tud/+ female no germline	Day	0.218
Virgin tud/+ female no germline	Day	0.374667
Virgin tud/+ female no germline	Day	0.339
Virgin tud/+ female no germline	Day	0.418333
Virgin tud/+ female no germline	Day	0.286667
Virgin tud/+ female no germline	Day	0.113667
Virgin tud/+ female no germline	Day	0.281
Virgin tud/+ female no germline	Day	0.183
Virgin tud/+ female no germline	Day	0.415667
Virgin tud/+ female no germline	Day	0.146667
Virgin tud/+ female no germline	Day	0.393667
Virgin tud/+ female no germline	Day	0.326333
Virgin tud/+ female no germline	Day	0.196
Virgin tud/+ female no germline	Day	0.240333
Virgin tud/+ female no germline	Day	0.403
Virgin tud/+ female no germline	Day	0.299
Virgin tud/+ female no germline	Day	0.124667
Virgin tud/+ female no germline	Day	0.170333
Virgin tud/+ female no germline	Day	0.156667
Virgin tud/+ female no germline	Day	0.211667
Virgin tud/+ female no germline	Day	0.337
Virgin tud/+ female no germline	Day	0.344
Virgin tud/+ female no germline	Day	0.301667
Virgin tud/+ female no germline	Day	0.526667
Virgin tud/+ female no germline	Day	0.301333
Virgin tud/+ female no germline	Day	0.207333
Virgin tud/+ female no germline	Day	0.161
Virgin tud/+ female no germline	Day	0.311
Virgin tud/+ female no germline	Day	0.250333
Virgin tud/+ female no germline	Day	0.121667
Virgin tud/+ female no germline	Day	0.224333
Virgin tud/+ female no germline	Day	0.314
Virgin tud/+ female no germline	Day	0.0253333
Virgin tud/+ female no germline	Day	0.216667
Virgin tud/+ female no germline	Day	0.249667
Virgin tud/+ female no germline	Day	0.498
Virgin tud/+ female no germline	Day	0.161
Virgin tud/+ female no germline	Day	0.05
Virgin tud/+ female no germline	Day	0.357
Virgin tud/+ female no germline	Day	0.319667
Virgin tud/+ female no germline	Day	0.153
Virgin tud/+ female no germline	Day	0.506667
Virgin tud/+ female no germline	Day	0.471667
Virgin tud/+ female no germline	Day	0.148
Virgin tud/+ female no germline	Day	0.271
Virgin tud/+ female no germline	Day	0.248
Virgin tud/+ female no germline	Day	0.233667
tud/+ female with germline mated to Berlin male	Day	0.045
tud/+ female with germline mated to Berlin male	Day	0.100667
tud/+ female with germline mated to Berlin male	Day	0.291333
tud/+ female with germline mated to Berlin male	Day	0.225667
tud/+ female with germline mated to Berlin male	Day	0.0583333
tud/+ female with germline mated to Berlin male	Day	0.237667
tud/+ female with germline mated to Berlin male	Day	0.00833333
tud/+ female with germline mated to Berlin male	Day	0.0976667
tud/+ female with germline mated to Berlin male	Day	0.0936667
tud/+ female with germline mated to Berlin male	Day	0.233667
tud/+ female with germline mated to Berlin male	Day	0.0846667
tud/+ female with germline mated to Berlin male	Day	0.186
tud/+ female with germline mated to Berlin male	Day	0.208
tud/+ female with germline mated to Berlin male	Day	0.0813333
tud/+ female with germline mated to Berlin male	Day	0.145
tud/+ female with germline mated to Berlin male	Day	0.309333
tud/+ female with germline mated to Berlin male	Day	0.324
tud/+ female with germline mated to Berlin male	Day	0.217333
tud/+ female with germline mated to Berlin male	Day	0.127667
tud/+ female with germline mated to Berlin male	Day	0.227
tud/+ female with germline mated to Berlin male	Day	0.324333
tud/+ female with germline mated to Berlin male	Day	0.187
tud/+ female with germline mated to Berlin male	Day	0.088
tud/+ female with germline mated to Berlin male	Day	0.462333
tud/+ female with germline mated to Berlin male	Day	0.0876667
tud/+ female with germline mated to Berlin male	Day	0.200667
tud/+ female with germline mated to Berlin male	Day	0.296667
tud/+ female with germline mated to Berlin male	Day	0.1
tud/+ female with germline mated to Berlin male	Day	0.111667
tud/+ female with germline mated to Berlin male	Day	0.150333
tud/+ female with germline mated to Berlin male	Day	0.057
tud/+ female with germline mated to Berlin male	Day	0.110333
tud/+ female with germline mated to Berlin male	Day	0.0846667
tud/+ female with germline mated to Berlin male	Day	0.05
tud/+ female with germline mated to Berlin male	Day	0.450667
tud/+ female with germline mated to Berlin male	Day	0.0993333
tud/+ female with germline mated to Berlin male	Day	0.376333
tud/+ female with germline mated to Berlin male	Day	0.119
tud/+ female with germline mated to Berlin male	Day	0.265667
tud/+ female with germline mated to Berlin male	Day	0.216333
tud/+ female with germline mated to Berlin male	Day	0.182667
tud/+ female with germline mated to Berlin male	Day	0.372
tud/+ female with germline mated to Berlin male	Day	0.323333
tud/+ female with germline mated to Berlin male	Day	0.216333
tud/+ female with germline mated to Berlin male	Day	0.0113333
tud/+ female with germline mated to Berlin male	Day	0.292333
tud/+ female with germline mated to Berlin male	Day	0.0763333
tud/+ female with germline mated to Berlin male	Day	0.127
tud/+ female with germline mated to Berlin male	Day	0.258
tud/+ female with germline mated to Berlin male	Day	0.248667
tud/+ female with germline mated to Berlin male	Day	0.31
tud/+ female with germline mated to Berlin male	Day	0.0863333
tud/+ female with germline mated to Berlin male	Day	0.057
tud/+ female with germline mated to Berlin male	Day	0.139667
tud/+ female with germline mated to Berlin male	Day	0.193
tud/+ female with germline mated to Berlin male	Day	0.402
tud/+ female with germline mated to Berlin male	Day	0.284
tud/+ female with germline mated to Berlin male	Day	0.061
tud/+ female with germline mated to Berlin male	Day	0.235333
tud/+ female with germline mated to Berlin male	Day	0.182667
tud/+ female with germline mated to Berlin male	Day	0.107333
tud/+ female with germline mated to Berlin male	Day	0.351
tud/+ female with germline mated to Berlin male	Day	0.109333
tud/+ female with germline mated to Berlin male	Day	0.084
tud/+ female with germline mated to Berlin male	Day	0.143333
tud/+ female with germline mated to Berlin male	Day	0.0363333
tud/+ female with germline mated to Berlin male	Day	0.241667
tud/+ female with germline mated to Berlin male	Day	0.277333
Berlin female mated to tud/+ male with no germline	Day	0.406333
Berlin female mated to tud/+ male with no germline	Day	0.136333
Berlin female mated to tud/+ male with no germline	Day	0.345333
Berlin female mated to tud/+ male with no germline	Day	0.510667
Berlin female mated to tud/+ male with no germline	Day	0.196333
Berlin female mated to tud/+ male with no germline	Day	0.195667
Berlin female mated to tud/+ male with no germline	Day	0.0336667
Berlin female mated to tud/+ male with no germline	Day	0.180333
Berlin female mated to tud/+ male with no germline	Day	0.210333
Berlin female mated to tud/+ male with no germline	Day	0.314333
Berlin female mated to tud/+ male with no germline	Day	0.121667
Berlin female mated to tud/+ male with no germline	Day	0.201
Berlin female mated to tud/+ male with no germline	Day	0.135667
Berlin female mated to tud/+ male with no germline	Day	0.369667
Berlin female mated to tud/+ male with no germline	Day	0.117667
Berlin female mated to tud/+ male with no germline	Day	0.106667
Berlin female mated to tud/+ male with no germline	Day	0.242667
Berlin female mated to tud/+ male with no germline	Day	0.168
Berlin female mated to tud/+ male with no germline	Day	0.09
Berlin female mated to tud/+ male with no germline	Day	0.186333
Berlin female mated to tud/+ male with no germline	Day	0.220667
Berlin female mated to tud/+ male with no germline	Day	0.272667
Berlin female mated to tud/+ male with no germline	Day	0.0923333
Berlin female mated to tud/+ male with no germline	Day	0.112667
Berlin female mated to tud/+ male with no germline	Day	0.0866667
Berlin female mated to tud/+ male with no germline	Day	0.233667
Berlin female mated to tud/+ male with no germline	Day	0.140333
Berlin female mated to tud/+ male with no germline	Day	0.129667
Berlin female mated to tud/+ male with no germline	Day	0.299667
Berlin female mated to tud/+ male with no germline	Day	0.171333
Berlin female mated to tud/+ male with no germline	Day	0.351
Berlin female mated to tud/+ male with no germline	Day	0.101667
Berlin female mated to tud/+ male with no germline	Day	0.402
Berlin female mated to tud/+ male with no germline	Day	0.187
Berlin female mated to tud/+ male with no germline	Day	0.0826667
Berlin female mated to tud/+ male with no germline	Day	0.033
Berlin female mated to tud/+ male with no germline	Day	0.049
Berlin female mated to tud/+ male with no germline	Day	0.137
Berlin female mated to tud/+ male with no germline	Day	0.247333
Berlin female mated to tud/+ male with no germline	Day	0.221
Berlin female mated to tud/+ male with no germline	Day	0.295
Berlin female mated to tud/+ male with no germline	Day	0.033
Berlin female mated to tud/+ male with no germline	Day	0.0693333
Berlin female mated to tud/+ male with no germline	Day	0.0806667
Berlin female mated to tud/+ male with no germline	Day	0.148667
Berlin female mated to tud/+ male with no germline	Day	0.178
Berlin female mated to tud/+ male with no germline	Day	0.288333
Berlin female mated to tud/+ male with no germline	Day	0.0943333
Berlin female mated to tud/+ male with no germline	Day	0.15
Berlin female mated to tud/+ male with no germline	Day	0.247333
Berlin female mated to tud/+ male with no germline	Day	0.282333
Berlin female mated to tud/+ male with no germline	Day	0.226667
Berlin female mated to tud/+ male with no germline	Day	0.469667
Berlin female mated to tud/+ male with no germline	Day	0.256667
Berlin female mated to tud/+ male with no germline	Day	0.192667
Berlin female mated to tud/+ male with no germline	Day	0.0473333
Berlin female mated to tud/+ male with no germline	Day	0.011
Berlin female mated to tud/+ male with no germline	Day	0.157
Berlin female mated to tud/+ male with no germline	Day	0.0766667
Berlin female mated to tud/+ male with no germline	Day	0.102667
Berlin female mated to tud/+ male with no germline	Day	0.246667
Berlin female mated to tud/+ male with no germline	Day	0.073
Berlin female mated to tud/+ male with no germline	Day	0.153667
Berlin female mated to tud/+ male with no germline	Day	0.311
Berlin female mated to tud/+ male with no germline	Day	0.079
Berlin female mated to tud/+ male with no germline	Day	0.083
Berlin female mated to tud/+ male with no germline	Day	0.301
Berlin female mated to tud/+ male with no germline	Day	0.311333
Berlin female mated to tud/+ male with no germline	Day	0.234
Virgin tud/+ female with a germline	Day	0.0796667
Virgin tud/+ female with a germline	Day	0.260333
Virgin tud/+ female with a germline	Day	0.0216667
Virgin tud/+ female with a germline	Day	0.273667
Virgin tud/+ female with a germline	Day	0.028
Virgin tud/+ female with a germline	Day	0.202667
Virgin tud/+ female with a germline	Day	0.133667
Virgin tud/+ female with a germline	Day	0.136333
Virgin tud/+ female with a germline	Day	0.484
Virgin tud/+ female with a germline	Day	0.357667
Virgin tud/+ female with a germline	Day	0.531
Virgin tud/+ female with a germline	Day	0.0646667
Virgin tud/+ female with a germline	Day	0.244667
Virgin tud/+ female with a germline	Day	0.426333
Virgin tud/+ female with a germline	Day	0.295
Virgin tud/+ female with a germline	Day	0.158333
Virgin tud/+ female with a germline	Day	0.158
Virgin tud/+ female with a germline	Day	0.177
Virgin tud/+ female with a germline	Day	0.0966667
Virgin tud/+ female with a germline	Day	0.310333
Virgin tud/+ female with a germline	Day	0.121333
Virgin tud/+ female with a germline	Day	0.409333
Virgin tud/+ female with a germline	Day	0.250333
Virgin tud/+ female with a germline	Day	0.0166667
Virgin tud/+ female with a germline	Day	0.0793333
Virgin tud/+ female with a germline	Day	0.0233333
Virgin tud/+ female with a germline	Day	0.160333
Virgin tud/+ female with a germline	Day	0.195
Virgin tud/+ female with a germline	Day	0.126333
Virgin tud/+ female with a germline	Day	0.336
Virgin tud/+ female with a germline	Day	0.102667
Virgin tud/+ female with a germline	Day	0.314667
Virgin tud/+ female with a germline	Day	0.191667
Virgin tud/+ female with a germline	Day	0.26
Virgin tud/+ female with a germline	Day	0.214667
Virgin tud/+ female with a germline	Day	0.0443333
Virgin tud/+ female with a germline	Day	0.264
Virgin tud/+ female with a germline	Day	0.241333
Virgin tud/+ female with a germline	Day	0.159333
Virgin tud/+ female with a germline	Day	0.135667
Virgin tud/+ female with a germline	Day	0.398667
Virgin tud/+ female with a germline	Day	0.387333
Virgin tud/+ female with a germline	Day	0.293
Virgin tud/+ female with a germline	Day	0.054
Virgin tud/+ female with a germline	Day	0.297333
Virgin tud/+ female with a germline	Day	0.378333
Virgin tud/+ female with a germline	Day	0.064
Virgin tud/+ female with a germline	Day	0.359333
Virgin tud/+ female with a germline	Day	0.04
Virgin tud/+ female with a germline	Day	0.400333
Virgin tud/+ female with a germline	Day	0.516667
Virgin tud/+ female with a germline	Day	0.378667
Virgin tud/+ female with a germline	Day	0.292333
Virgin tud/+ female with a germline	Day	0.160667
Virgin tud/+ female with a germline	Day	0.206333
Virgin tud/+ female with a germline	Day	0.0946667
Virgin tud/+ female with a germline	Day	0.251
Virgin tud/+ female with a germline	Day	0.031
Virgin tud/+ female with a germline	Day	0.230667
Virgin tud/+ female with a germline	Day	0.341
Virgin tud/+ female with a germline	Day	0.061
Virgin tud/+ female with a germline	Day	0.363667
Virgin tud/+ female with a germline	Day	0.276333
Virgin tud/+ female with a germline	Day	0.218667
Virgin tud/+ female with a germline	Day	0.278
Virgin tud/+ female with a germline	Day	0.181
Virgin tud/+ female with a germline	Day	0.139667
White Canton S female mated to white Canton S male	Day	0.392333
White Canton S female mated to white Canton S male	Day	0.33
White Canton S female mated to white Canton S male	Day	0.302
White Canton S female mated to white Canton S male	Day	0.154667
White Canton S female mated to white Canton S male	Day	0.122
White Canton S female mated to white Canton S male	Day	0.184
White Canton S female mated to white Canton S male	Day	0.417
White Canton S female mated to white Canton S male	Day	0.411
White Canton S female mated to white Canton S male	Day	0.303333
White Canton S female mated to white Canton S male	Day	0.238
White Canton S female mated to white Canton S male	Day	0.117667
White Canton S female mated to white Canton S male	Day	0.158333
White Canton S female mated to white Canton S male	Day	0.164667
White Canton S female mated to white Canton S male	Day	0.451333
White Canton S female mated to white Canton S male	Day	0.341333
White Canton S female mated to white Canton S male	Day	0.168
White Canton S female mated to white Canton S male	Day	0.442667
White Canton S female mated to white Canton S male	Day	0.419
White Canton S female mated to white Canton S male	Day	0.332667
White Canton S female mated to white Canton S male	Day	0.264333
White Canton S female mated to white Canton S male	Day	0.300333
White Canton S female mated to white Canton S male	Day	0.358667
White Canton S female mated to white Canton S male	Day	0.0893333
White Canton S female mated to white Canton S male	Day	0.227667
White Canton S female mated to white Canton S male	Day	0.34
White Canton S female mated to white Canton S male	Day	0.38
White Canton S female mated to white Canton S male	Day	0.344667
White Canton S female mated to white Canton S male	Day	0.171333
White Canton S female mated to white Canton S male	Day	0.267
White Canton S female mated to white Canton S male	Day	0.554333
White Canton S female mated to white Canton S male	Day	0.42
White Canton S female mated to white Canton S male	Day	0.178667
White Canton S female mated to white Canton S male	Day	0.141333
White Canton S female mated to white Canton S male	Day	0.314667
White Canton S female mated to white Canton S male	Day	0.301333
White Canton S female mated to white Canton S male	Day	0.322667
White Canton S female mated to white Canton S male	Day	0.351667
White Canton S female mated to white Canton S male	Day	0.311667
White Canton S female mated to white Canton S male	Day	0.293
White Canton S female mated to white Canton S male	Day	0.338
White Canton S female mated to white Canton S male	Day	0.366
White Canton S female mated to white Canton S male	Day	0.362667
White Canton S female mated to white Canton S male	Day	0.369667
White Canton S female mated to white Canton S male	Day	0.314667
White Canton S female mated to white Canton S male	Day	0.238667
White Canton S female mated to white Canton S male	Day	0.386333
White Canton S female mated to white Canton S male	Day	0.177667
White Canton S female mated to white Canton S male	Day	0.153
White Canton S female mated to white Canton S male	Day	0.461
White Canton S female mated to white Canton S male	Day	0.179333
White Canton S female mated to white Canton S male	Day	0.213333
White Canton S female mated to white Canton S male	Day	0.351667
White Canton S female mated to white Canton S male	Day	0.158
White Canton S female mated to white Canton S male	Day	0.212333
White Canton S female mated to white Canton S male	Day	0.212
White Canton S female mated to white Canton S male	Day	0.346
White Canton S female mated to white Canton S male	Day	0.289667
White Canton S female mated to white Canton S male	Day	0.410667
White Canton S female mated to white Canton S male	Day	0.323
White Canton S female mated to white Canton S male	Day	0.234667
White Canton S female mated to white Canton S male	Day	0.274333
White Canton S female mated to white Canton S male	Day	0.174667
White Canton S female mated to white Canton S male	Day	0.348
White Canton S female mated to white Canton S male	Day	0.132333
White Canton S female mated to white Canton S male	Day	0.273333
White Canton S female mated to white Canton S male	Day	0.207
White Canton S female mated to white Canton S male	Day	0.257667
White Canton S female mated to white Canton S male	Day	0.321333
White Canton S female mated to white Canton S male	Day	0.240333

## Sheet: Avg. sleep per individual night
Condition	Light_status	mean_sleep_per_ind
Virgin Berlin	Night	0.42893
Virgin Berlin	Night	0.667224
Virgin Berlin	Night	0.493311
Virgin Berlin	Night	0.494983
Virgin Berlin	Night	0.223244
Virgin Berlin	Night	0.700669
Virgin Berlin	Night	0.291806
Virgin Berlin	Night	0.332776
Virgin Berlin	Night	0.345318
Virgin Berlin	Night	0.464883
Virgin Berlin	Night	0.0911371
Virgin Berlin	Night	0.324415
Virgin Berlin	Night	0.43311
Virgin Berlin	Night	0.478261
Virgin Berlin	Night	0.323579
Virgin Berlin	Night	0.532609
Virgin Berlin	Night	0.304348
Virgin Berlin	Night	0.421405
Virgin Berlin	Night	0.208194
Virgin Berlin	Night	0.599498
Virgin Berlin	Night	0.479933
Virgin Berlin	Night	0.301839
Virgin Berlin	Night	0.367893
Virgin Berlin	Night	0.407191
Virgin Berlin	Night	0.523411
Virgin Berlin	Night	0.287625
Virgin Berlin	Night	0.170569
Virgin Berlin	Night	0.258361
Virgin Berlin	Night	0.167224
Virgin Berlin	Night	0.624582
Virgin Berlin	Night	0.526756
Virgin Berlin	Night	0.229933
Virgin Berlin	Night	0.326087
Virgin Berlin	Night	0.770067
Virgin Berlin	Night	0.596154
Virgin Berlin	Night	0.41806
Virgin Berlin	Night	0.305184
Virgin Berlin	Night	0.335284
Virgin Berlin	Night	0.219064
Virgin Berlin	Night	0.400502
Virgin Berlin	Night	0.270903
Virgin Berlin	Night	0.255853
Virgin Berlin	Night	0.296823
Virgin Berlin	Night	0.647993
Virgin Berlin	Night	0.474916
Virgin Berlin	Night	0.687291
Virgin Berlin	Night	0.183946
Virgin Berlin	Night	0.462375
Virgin Berlin	Night	0.406355
Virgin Berlin	Night	0.39214
Virgin Berlin	Night	0.394649
Virgin Berlin	Night	0.361204
Virgin Berlin	Night	0.239967
Virgin Berlin	Night	0.566054
Virgin Berlin	Night	0.389632
Virgin Berlin	Night	0.448997
Virgin Berlin	Night	0.429766
Virgin Berlin	Night	0.506689
Virgin Berlin	Night	0.54097
Virgin Berlin	Night	0.498328
Virgin Berlin	Night	0.309365
Virgin Berlin	Night	0.41806
Virgin Berlin	Night	0.325251
Virgin Berlin	Night	0.507525
Virgin Berlin	Night	0.327759
Virgin Berlin	Night	0.414716
Virgin Berlin	Night	0.464047
Virgin Berlin	Night	0.639632
Virgin Berlin	Night	0.479933
Virgin Berlin	Night	0.380435
tud/+ no germline mated to Berlin male	Night	0.792642
tud/+ no germline mated to Berlin male	Night	0.76505
tud/+ no germline mated to Berlin male	Night	0.916388
tud/+ no germline mated to Berlin male	Night	0.811037
tud/+ no germline mated to Berlin male	Night	0.754181
tud/+ no germline mated to Berlin male	Night	0.817726
tud/+ no germline mated to Berlin male	Night	0.779264
tud/+ no germline mated to Berlin male	Night	0.603679
tud/+ no germline mated to Berlin male	Night	0.610368
tud/+ no germline mated to Berlin male	Night	0.738294
tud/+ no germline mated to Berlin male	Night	0.816054
tud/+ no germline mated to Berlin male	Night	0.924749
tud/+ no germline mated to Berlin male	Night	0.876254
tud/+ no germline mated to Berlin male	Night	0.569398
tud/+ no germline mated to Berlin male	Night	0.308528
tud/+ no germline mated to Berlin male	Night	0.85786
tud/+ no germline mated to Berlin male	Night	0.60786
tud/+ no germline mated to Berlin male	Night	0.533445
tud/+ no germline mated to Berlin male	Night	0.776756
tud/+ no germline mated to Berlin male	Night	0.799331
tud/+ no germline mated to Berlin male	Night	0.712375
tud/+ no germline mated to Berlin male	Night	0.466555
tud/+ no germline mated to Berlin male	Night	0.851171
tud/+ no germline mated to Berlin male	Night	0.790134
tud/+ no germline mated to Berlin male	Night	0.568562
tud/+ no germline mated to Berlin male	Night	0.820234
tud/+ no germline mated to Berlin male	Night	0.770067
tud/+ no germline mated to Berlin male	Night	0.479933
tud/+ no germline mated to Berlin male	Night	0.7801
tud/+ no germline mated to Berlin male	Night	0.850334
tud/+ no germline mated to Berlin male	Night	0.623746
tud/+ no germline mated to Berlin male	Night	0.778428
tud/+ no germline mated to Berlin male	Night	0.705686
tud/+ no germline mated to Berlin male	Night	0.446488
tud/+ no germline mated to Berlin male	Night	0.847826
tud/+ no germline mated to Berlin male	Night	0.693144
tud/+ no germline mated to Berlin male	Night	0.634615
tud/+ no germline mated to Berlin male	Night	0.576087
tud/+ no germline mated to Berlin male	Night	0.81689
tud/+ no germline mated to Berlin male	Night	0.878763
tud/+ no germline mated to Berlin male	Night	0.806856
tud/+ no germline mated to Berlin male	Night	0.581104
tud/+ no germline mated to Berlin male	Night	0.686455
tud/+ no germline mated to Berlin male	Night	0.835284
tud/+ no germline mated to Berlin male	Night	0.884615
tud/+ no germline mated to Berlin male	Night	0.753344
tud/+ no germline mated to Berlin male	Night	0.799331
tud/+ no germline mated to Berlin male	Night	0.464883
tud/+ no germline mated to Berlin male	Night	0.631271
tud/+ no germline mated to Berlin male	Night	0.606187
tud/+ no germline mated to Berlin male	Night	0.725753
tud/+ no germline mated to Berlin male	Night	0.636288
tud/+ no germline mated to Berlin male	Night	0.908863
tud/+ no germline mated to Berlin male	Night	0.83194
tud/+ no germline mated to Berlin male	Night	0.490803
tud/+ no germline mated to Berlin male	Night	0.679766
tud/+ no germline mated to Berlin male	Night	0.553512
tud/+ no germline mated to Berlin male	Night	0.931438
tud/+ no germline mated to Berlin male	Night	0.90301
tud/+ no germline mated to Berlin male	Night	0.88796
tud/+ no germline mated to Berlin male	Night	0.600334
tud/+ no germline mated to Berlin male	Night	0.651338
tud/+ no germline mated to Berlin male	Night	0.67893
tud/+ no germline mated to Berlin male	Night	0.729097
tud/+ no germline mated to Berlin male	Night	0.572742
tud/+ no germline mated to Berlin male	Night	0.711538
tud/+ no germline mated to Berlin male	Night	0.554348
tud/+ no germline mated to Berlin male	Night	0.624582
tud/+ no germline mated to Berlin male	Night	0.712375
Berlin mated to tud/+ male with a germline	Night	0.331104
Berlin mated to tud/+ male with a germline	Night	0.647993
Berlin mated to tud/+ male with a germline	Night	0.928094
Berlin mated to tud/+ male with a germline	Night	0.652174
Berlin mated to tud/+ male with a germline	Night	0.468227
Berlin mated to tud/+ male with a germline	Night	0.618729
Berlin mated to tud/+ male with a germline	Night	0.680602
Berlin mated to tud/+ male with a germline	Night	0.627926
Berlin mated to tud/+ male with a germline	Night	0.303512
Berlin mated to tud/+ male with a germline	Night	0.411371
Berlin mated to tud/+ male with a germline	Night	0.449833
Berlin mated to tud/+ male with a germline	Night	0.573579
Berlin mated to tud/+ male with a germline	Night	0.458194
Berlin mated to tud/+ male with a germline	Night	0.58612
Berlin mated to tud/+ male with a germline	Night	0.519231
Berlin mated to tud/+ male with a germline	Night	0.627926
Berlin mated to tud/+ male with a germline	Night	0.465719
Berlin mated to tud/+ male with a germline	Night	0.892977
Berlin mated to tud/+ male with a germline	Night	0.397157
Berlin mated to tud/+ male with a germline	Night	0.448997
Berlin mated to tud/+ male with a germline	Night	0.83612
Berlin mated to tud/+ male with a germline	Night	0.744147
Berlin mated to tud/+ male with a germline	Night	0.704013
Berlin mated to tud/+ male with a germline	Night	0.693144
Berlin mated to tud/+ male with a germline	Night	0.526756
Berlin mated to tud/+ male with a germline	Night	0.465719
Berlin mated to tud/+ male with a germline	Night	0.771739
Berlin mated to tud/+ male with a germline	Night	0.502508
Berlin mated to tud/+ male with a germline	Night	0.579431
Berlin mated to tud/+ male with a germline	Night	0.438127
Berlin mated to tud/+ male with a germline	Night	0.429766
Berlin mated to tud/+ male with a germline	Night	0.552676
Berlin mated to tud/+ male with a germline	Night	0.284281
Berlin mated to tud/+ male with a germline	Night	0.222408
Berlin mated to tud/+ male with a germline	Night	0.479933
Berlin mated to tud/+ male with a germline	Night	0.33612
Berlin mated to tud/+ male with a germline	Night	0.766722
Berlin mated to tud/+ male with a germline	Night	0.440635
Berlin mated to tud/+ male with a germline	Night	0.689799
Berlin mated to tud/+ male with a germline	Night	0.543478
Berlin mated to tud/+ male with a germline	Night	0.234114
Berlin mated to tud/+ male with a germline	Night	0.640468
Berlin mated to tud/+ male with a germline	Night	0.322742
Berlin mated to tud/+ male with a germline	Night	0.448161
Berlin mated to tud/+ male with a germline	Night	0.834448
Berlin mated to tud/+ male with a germline	Night	0.154682
Berlin mated to tud/+ male with a germline	Night	0.290134
Berlin mated to tud/+ male with a germline	Night	0.721572
Berlin mated to tud/+ male with a germline	Night	0.752508
Berlin mated to tud/+ male with a germline	Night	0.658863
Berlin mated to tud/+ male with a germline	Night	0.254181
Berlin mated to tud/+ male with a germline	Night	0.553512
Berlin mated to tud/+ male with a germline	Night	0.433946
Berlin mated to tud/+ male with a germline	Night	0.45903
Berlin mated to tud/+ male with a germline	Night	0.658863
Berlin mated to tud/+ male with a germline	Night	0.344482
Berlin mated to tud/+ male with a germline	Night	0.608696
Berlin mated to tud/+ male with a germline	Night	0.433946
Berlin mated to tud/+ male with a germline	Night	0.659699
Berlin mated to tud/+ male with a germline	Night	0.470736
Berlin mated to tud/+ male with a germline	Night	0.643813
Berlin mated to tud/+ male with a germline	Night	0.656355
Berlin mated to tud/+ male with a germline	Night	0.529264
Berlin mated to tud/+ male with a germline	Night	0.441472
Berlin mated to tud/+ male with a germline	Night	0.32107
Berlin mated to tud/+ male with a germline	Night	0.388796
Berlin mated to tud/+ male with a germline	Night	0.5301
Berlin mated to tud/+ male with a germline	Night	0.578595
Virgin white Canton S	Night	0.779264
Virgin white Canton S	Night	0.732441
Virgin white Canton S	Night	0.792642
Virgin white Canton S	Night	0.86204
Virgin white Canton S	Night	0.813545
Virgin white Canton S	Night	0.608696
Virgin white Canton S	Night	0.73913
Virgin white Canton S	Night	0.670569
Virgin white Canton S	Night	0.618729
Virgin white Canton S	Night	0.845318
Virgin white Canton S	Night	0.602007
Virgin white Canton S	Night	0.653846
Virgin white Canton S	Night	0.733278
Virgin white Canton S	Night	0.805184
Virgin white Canton S	Night	0.725753
Virgin white Canton S	Night	0.62291
Virgin white Canton S	Night	0.7801
Virgin white Canton S	Night	0.704849
Virgin white Canton S	Night	0.76505
Virgin white Canton S	Night	0.866221
Virgin white Canton S	Night	0.852007
Virgin white Canton S	Night	0.672241
Virgin white Canton S	Night	0.751672
Virgin white Canton S	Night	0.879599
Virgin white Canton S	Night	0.811037
Virgin white Canton S	Night	0.699833
Virgin white Canton S	Night	0.817726
Virgin white Canton S	Night	0.757525
Virgin white Canton S	Night	0.67893
Virgin white Canton S	Night	0.881271
Virgin white Canton S	Night	0.593645
Virgin white Canton S	Night	0.68311
Virgin white Canton S	Night	0.80602
Virgin white Canton S	Night	0.765886
Virgin white Canton S	Night	0.778428
Virgin white Canton S	Night	0.785117
Virgin white Canton S	Night	0.649666
Virgin white Canton S	Night	0.605351
Virgin white Canton S	Night	0.551839
Virgin white Canton S	Night	0.297659
Virgin white Canton S	Night	0.52592
Virgin white Canton S	Night	0.309365
Virgin white Canton S	Night	0.881271
Virgin white Canton S	Night	0.749164
Virgin white Canton S	Night	0.860368
Virgin white Canton S	Night	0.856187
Virgin white Canton S	Night	0.770067
Virgin white Canton S	Night	0.828595
Virgin white Canton S	Night	0.797659
Virgin white Canton S	Night	0.727425
Virgin white Canton S	Night	0.776756
Virgin white Canton S	Night	0.419732
Virgin white Canton S	Night	0.509197
Virgin white Canton S	Night	0.732441
Virgin white Canton S	Night	0.871237
Virgin white Canton S	Night	0.855351
Virgin white Canton S	Night	0.663043
Virgin white Canton S	Night	0.812709
Virgin white Canton S	Night	0.791806
Virgin white Canton S	Night	0.506689
Virgin white Canton S	Night	0.571906
Virgin white Canton S	Night	0.573579
Virgin white Canton S	Night	0.642977
Virgin white Canton S	Night	0.773411
Virgin white Canton S	Night	0.734114
Virgin white Canton S	Night	0.801839
Virgin white Canton S	Night	0.854515
Virgin white Canton S	Night	0.698997
Virgin white Canton S	Night	0.809365
Virgin white Canton S	Night	0.788462
Berlin female mated to Berlin male	Night	0.347826
Berlin female mated to Berlin male	Night	0.401338
Berlin female mated to Berlin male	Night	0.740803
Berlin female mated to Berlin male	Night	0.308528
Berlin female mated to Berlin male	Night	0.535117
Berlin female mated to Berlin male	Night	0.578595
Berlin female mated to Berlin male	Night	0.462375
Berlin female mated to Berlin male	Night	0.462375
Berlin female mated to Berlin male	Night	0.454849
Berlin female mated to Berlin male	Night	0.342809
Berlin female mated to Berlin male	Night	0.362876
Berlin female mated to Berlin male	Night	0.425585
Berlin female mated to Berlin male	Night	0.317726
Berlin female mated to Berlin male	Night	0.183946
Berlin female mated to Berlin male	Night	0.554348
Berlin female mated to Berlin male	Night	0.540134
Berlin female mated to Berlin male	Night	0.311037
Berlin female mated to Berlin male	Night	0.282609
Berlin female mated to Berlin male	Night	0.66388
Berlin female mated to Berlin male	Night	0.653846
Berlin female mated to Berlin male	Night	0.477425
Berlin female mated to Berlin male	Night	0.545987
Berlin female mated to Berlin male	Night	0.227425
Berlin female mated to Berlin male	Night	0.714047
Berlin female mated to Berlin male	Night	0.467391
Berlin female mated to Berlin male	Night	0.652174
Berlin female mated to Berlin male	Night	0.488294
Berlin female mated to Berlin male	Night	0.432274
Berlin female mated to Berlin male	Night	0.390468
Berlin female mated to Berlin male	Night	0.289298
Berlin female mated to Berlin male	Night	0.676421
Berlin female mated to Berlin male	Night	0.445652
Berlin female mated to Berlin male	Night	0.252508
Berlin female mated to Berlin male	Night	0.520903
Berlin female mated to Berlin male	Night	0.640468
Berlin female mated to Berlin male	Night	0.378763
Berlin female mated to Berlin male	Night	0.391304
Berlin female mated to Berlin male	Night	0.67893
Berlin female mated to Berlin male	Night	0.321906
Berlin female mated to Berlin male	Night	0.26505
Berlin female mated to Berlin male	Night	0.540134
Berlin female mated to Berlin male	Night	0.672241
Berlin female mated to Berlin male	Night	0.624582
Berlin female mated to Berlin male	Night	0.435619
Berlin female mated to Berlin male	Night	0.45903
Berlin female mated to Berlin male	Night	0.731605
Berlin female mated to Berlin male	Night	0.537625
Berlin female mated to Berlin male	Night	0.664716
Berlin female mated to Berlin male	Night	0.393813
Berlin female mated to Berlin male	Night	0.501672
Berlin female mated to Berlin male	Night	0.185619
Berlin female mated to Berlin male	Night	0.555184
Berlin female mated to Berlin male	Night	0.314381
Berlin female mated to Berlin male	Night	0.285953
Berlin female mated to Berlin male	Night	0.687291
Berlin female mated to Berlin male	Night	0.244983
Berlin female mated to Berlin male	Night	0.626254
Berlin female mated to Berlin male	Night	0.434783
Berlin female mated to Berlin male	Night	0.521739
Berlin female mated to Berlin male	Night	0.389632
Berlin female mated to Berlin male	Night	0.599498
Berlin female mated to Berlin male	Night	0.501672
Berlin female mated to Berlin male	Night	0.637124
Berlin female mated to Berlin male	Night	0.678094
Berlin female mated to Berlin male	Night	0.361204
Berlin female mated to Berlin male	Night	0.261706
Berlin female mated to Berlin male	Night	0.675585
Berlin female mated to Berlin male	Night	0.423077
Virgin tud/+ female no germline	Night	0.213211
Virgin tud/+ female no germline	Night	0.433946
Virgin tud/+ female no germline	Night	0.811037
Virgin tud/+ female no germline	Night	0.844482
Virgin tud/+ female no germline	Night	0.505853
Virgin tud/+ female no germline	Night	0.642977
Virgin tud/+ female no germline	Night	0.673077
Virgin tud/+ female no germline	Night	0.466555
Virgin tud/+ female no germline	Night	0.11204
Virgin tud/+ female no germline	Night	0.634615
Virgin tud/+ female no germline	Night	0.524247
Virgin tud/+ female no germline	Night	0.866221
Virgin tud/+ female no germline	Night	0.817726
Virgin tud/+ female no germline	Night	0.604515
Virgin tud/+ female no germline	Night	0.576923
Virgin tud/+ female no germline	Night	0.453177
Virgin tud/+ female no germline	Night	0.392977
Virgin tud/+ female no germline	Night	0.365385
Virgin tud/+ female no germline	Night	0.506689
Virgin tud/+ female no germline	Night	0.694816
Virgin tud/+ female no germline	Night	0.518395
Virgin tud/+ female no germline	Night	0.691472
Virgin tud/+ female no germline	Night	0.311037
Virgin tud/+ female no germline	Night	0.422241
Virgin tud/+ female no germline	Night	0.583612
Virgin tud/+ female no germline	Night	0.494983
Virgin tud/+ female no germline	Night	0.801839
Virgin tud/+ female no germline	Night	0.494147
Virgin tud/+ female no germline	Night	0.451505
Virgin tud/+ female no germline	Night	0.188963
Virgin tud/+ female no germline	Night	0.38796
Virgin tud/+ female no germline	Night	0.332776
Virgin tud/+ female no germline	Night	0.318562
Virgin tud/+ female no germline	Night	0.893813
Virgin tud/+ female no germline	Night	0.765886
Virgin tud/+ female no germline	Night	0.244983
Virgin tud/+ female no germline	Night	0.552676
Virgin tud/+ female no germline	Night	0.745819
Virgin tud/+ female no germline	Night	0.322742
Virgin tud/+ female no germline	Night	0.346154
Virgin tud/+ female no germline	Night	0.562709
Virgin tud/+ female no germline	Night	0.549331
Virgin tud/+ female no germline	Night	0.414716
Virgin tud/+ female no germline	Night	0.658027
Virgin tud/+ female no germline	Night	0.482441
Virgin tud/+ female no germline	Night	0.736622
Virgin tud/+ female no germline	Night	0.208194
Virgin tud/+ female no germline	Night	0.836957
Virgin tud/+ female no germline	Night	0.550167
Virgin tud/+ female no germline	Night	0.182274
Virgin tud/+ female no germline	Night	0.7801
Virgin tud/+ female no germline	Night	0.428094
Virgin tud/+ female no germline	Night	0.815217
Virgin tud/+ female no germline	Night	0.538462
Virgin tud/+ female no germline	Night	0.720736
Virgin tud/+ female no germline	Night	0.323579
Virgin tud/+ female no germline	Night	0.832776
Virgin tud/+ female no germline	Night	0.622074
Virgin tud/+ female no germline	Night	0.634615
Virgin tud/+ female no germline	Night	0.808528
Virgin tud/+ female no germline	Night	0.341973
Virgin tud/+ female no germline	Night	0.782609
Virgin tud/+ female no germline	Night	0.521739
Virgin tud/+ female no germline	Night	0.664716
Virgin tud/+ female no germline	Night	0.43311
tud/+ female with germline mated to Berlin male	Night	0.565217
tud/+ female with germline mated to Berlin male	Night	0.412207
tud/+ female with germline mated to Berlin male	Night	0.450669
tud/+ female with germline mated to Berlin male	Night	0.605351
tud/+ female with germline mated to Berlin male	Night	0.551839
tud/+ female with germline mated to Berlin male	Night	0.550167
tud/+ female with germline mated to Berlin male	Night	0.383779
tud/+ female with germline mated to Berlin male	Night	0.373746
tud/+ female with germline mated to Berlin male	Night	0.641304
tud/+ female with germline mated to Berlin male	Night	0.810201
tud/+ female with germline mated to Berlin male	Night	0.439799
tud/+ female with germline mated to Berlin male	Night	0.67893
tud/+ female with germline mated to Berlin male	Night	0.37291
tud/+ female with germline mated to Berlin male	Night	0.586957
tud/+ female with germline mated to Berlin male	Night	0.431438
tud/+ female with germline mated to Berlin male	Night	0.368729
tud/+ female with germline mated to Berlin male	Night	0.330268
tud/+ female with germline mated to Berlin male	Night	0.407191
tud/+ female with germline mated to Berlin male	Night	0.344482
tud/+ female with germline mated to Berlin male	Night	0.809365
tud/+ female with germline mated to Berlin male	Night	0.736622
tud/+ female with germline mated to Berlin male	Night	0.45903
tud/+ female with germline mated to Berlin male	Night	0.671405
tud/+ female with germline mated to Berlin male	Night	0.241639
tud/+ female with germline mated to Berlin male	Night	0.901338
tud/+ female with germline mated to Berlin male	Night	0.569398
tud/+ female with germline mated to Berlin male	Night	0.233278
tud/+ female with germline mated to Berlin male	Night	0.39214
tud/+ female with germline mated to Berlin male	Night	0.76505
tud/+ female with germline mated to Berlin male	Night	0.632107
tud/+ female with germline mated to Berlin male	Night	0.504181
tud/+ female with germline mated to Berlin male	Night	0.355351
tud/+ female with germline mated to Berlin male	Night	0.765886
tud/+ female with germline mated to Berlin male	Night	0.610368
tud/+ female with germline mated to Berlin male	Night	0.412207
tud/+ female with germline mated to Berlin male	Night	0.527592
tud/+ female with germline mated to Berlin male	Night	0.700669
tud/+ female with germline mated to Berlin male	Night	0.48913
tud/+ female with germline mated to Berlin male	Night	0.321906
tud/+ female with germline mated to Berlin male	Night	0.4699
tud/+ female with germline mated to Berlin male	Night	0.618729
tud/+ female with germline mated to Berlin male	Night	0.411371
tud/+ female with germline mated to Berlin male	Night	0.76505
tud/+ female with germline mated to Berlin male	Night	0.632107
tud/+ female with germline mated to Berlin male	Night	0.505853
tud/+ female with germline mated to Berlin male	Night	0.434783
tud/+ female with germline mated to Berlin male	Night	0.604515
tud/+ female with germline mated to Berlin male	Night	0.434783
tud/+ female with germline mated to Berlin male	Night	0.206522
tud/+ female with germline mated to Berlin male	Night	0.676421
tud/+ female with germline mated to Berlin male	Night	0.306856
tud/+ female with germline mated to Berlin male	Night	0.58612
tud/+ female with germline mated to Berlin male	Night	0.590301
tud/+ female with germline mated to Berlin male	Night	0.478261
tud/+ female with germline mated to Berlin male	Night	0.639632
tud/+ female with germline mated to Berlin male	Night	0.44398
tud/+ female with germline mated to Berlin male	Night	0.819398
tud/+ female with germline mated to Berlin male	Night	0.388796
tud/+ female with germline mated to Berlin male	Night	0.551003
tud/+ female with germline mated to Berlin male	Night	0.879599
tud/+ female with germline mated to Berlin male	Night	0.544314
tud/+ female with germline mated to Berlin male	Night	0.571906
tud/+ female with germline mated to Berlin male	Night	0.778428
tud/+ female with germline mated to Berlin male	Night	0.608696
tud/+ female with germline mated to Berlin male	Night	0.664716
tud/+ female with germline mated to Berlin male	Night	0.40301
tud/+ female with germline mated to Berlin male	Night	0.510033
tud/+ female with germline mated to Berlin male	Night	0.769231
Berlin female mated to tud/+ male with no germline	Night	0.645485
Berlin female mated to tud/+ male with no germline	Night	0.551839
Berlin female mated to tud/+ male with no germline	Night	0.708194
Berlin female mated to tud/+ male with no germline	Night	0.615385
Berlin female mated to tud/+ male with no germline	Night	0.340301
Berlin female mated to tud/+ male with no germline	Night	0.563545
Berlin female mated to tud/+ male with no germline	Night	0.419732
Berlin female mated to tud/+ male with no germline	Night	0.638796
Berlin female mated to tud/+ male with no germline	Night	0.505017
Berlin female mated to tud/+ male with no germline	Night	0.62291
Berlin female mated to tud/+ male with no germline	Night	0.26505
Berlin female mated to tud/+ male with no germline	Night	0.624582
Berlin female mated to tud/+ male with no germline	Night	0.735786
Berlin female mated to tud/+ male with no germline	Night	0.505853
Berlin female mated to tud/+ male with no germline	Night	0.711538
Berlin female mated to tud/+ male with no germline	Night	0.303512
Berlin female mated to tud/+ male with no germline	Night	0.582776
Berlin female mated to tud/+ male with no germline	Night	0.773411
Berlin female mated to tud/+ male with no germline	Night	0.351171
Berlin female mated to tud/+ male with no germline	Night	0.604515
Berlin female mated to tud/+ male with no germline	Night	0.319398
Berlin female mated to tud/+ male with no germline	Night	0.5301
Berlin female mated to tud/+ male with no germline	Night	0.625418
Berlin female mated to tud/+ male with no germline	Night	0.502508
Berlin female mated to tud/+ male with no germline	Night	0.48495
Berlin female mated to tud/+ male with no germline	Night	0.317726
Berlin female mated to tud/+ male with no germline	Night	0.651338
Berlin female mated to tud/+ male with no germline	Night	0.63796
Berlin female mated to tud/+ male with no germline	Night	0.56689
Berlin female mated to tud/+ male with no germline	Night	0.609532
Berlin female mated to tud/+ male with no germline	Night	0.600334
Berlin female mated to tud/+ male with no germline	Night	0.5
Berlin female mated to tud/+ male with no germline	Night	0.386288
Berlin female mated to tud/+ male with no germline	Night	0.454849
Berlin female mated to tud/+ male with no germline	Night	0.445652
Berlin female mated to tud/+ male with no germline	Night	0.563545
Berlin female mated to tud/+ male with no germline	Night	0.516722
Berlin female mated to tud/+ male with no germline	Night	0.0861204
Berlin female mated to tud/+ male with no germline	Night	0.533445
Berlin female mated to tud/+ male with no germline	Night	0.636288
Berlin female mated to tud/+ male with no germline	Night	0.284281
Berlin female mated to tud/+ male with no germline	Night	0.317726
Berlin female mated to tud/+ male with no germline	Night	0.496656
Berlin female mated to tud/+ male with no germline	Night	0.731605
Berlin female mated to tud/+ male with no germline	Night	0.759197
Berlin female mated to tud/+ male with no germline	Night	0.509197
Berlin female mated to tud/+ male with no germline	Night	0.378763
Berlin female mated to tud/+ male with no germline	Night	0.356187
Berlin female mated to tud/+ male with no germline	Night	0.477425
Berlin female mated to tud/+ male with no germline	Night	0.242475
Berlin female mated to tud/+ male with no germline	Night	0.576087
Berlin female mated to tud/+ male with no germline	Night	0.581104
Berlin female mated to tud/+ male with no germline	Night	0.65301
Berlin female mated to tud/+ male with no germline	Night	0.499164
Berlin female mated to tud/+ male with no germline	Night	0.339465
Berlin female mated to tud/+ male with no germline	Night	0.581104
Berlin female mated to tud/+ male with no germline	Night	0.304348
Berlin female mated to tud/+ male with no germline	Night	0.711538
Berlin female mated to tud/+ male with no germline	Night	0.663043
Berlin female mated to tud/+ male with no germline	Night	0.434783
Berlin female mated to tud/+ male with no germline	Night	0.249164
Berlin female mated to tud/+ male with no germline	Night	0.62291
Berlin female mated to tud/+ male with no germline	Night	0.408027
Berlin female mated to tud/+ male with no germline	Night	0.516722
Berlin female mated to tud/+ male with no germline	Night	0.582776
Berlin female mated to tud/+ male with no germline	Night	0.520903
Berlin female mated to tud/+ male with no germline	Night	0.268395
Berlin female mated to tud/+ male with no germline	Night	0.393813
Berlin female mated to tud/+ male with no germline	Night	0.72408
Virgin tud/+ female with a germline	Night	0.654682
Virgin tud/+ female with a germline	Night	0.773411
Virgin tud/+ female with a germline	Night	0.820234
Virgin tud/+ female with a germline	Night	0.638796
Virgin tud/+ female with a germline	Night	0.391304
Virgin tud/+ female with a germline	Night	0.475753
Virgin tud/+ female with a germline	Night	0.555184
Virgin tud/+ female with a germline	Night	0.620401
Virgin tud/+ female with a germline	Night	0.719064
Virgin tud/+ female with a germline	Night	0.914716
Virgin tud/+ female with a germline	Night	0.884615
Virgin tud/+ female with a germline	Night	0.387124
Virgin tud/+ female with a germline	Night	0.479097
Virgin tud/+ female with a germline	Night	0.744147
Virgin tud/+ female with a germline	Night	0.718227
Virgin tud/+ female with a germline	Night	0.55602
Virgin tud/+ female with a germline	Night	0.657191
Virgin tud/+ female with a germline	Night	0.632943
Virgin tud/+ female with a germline	Night	0.824415
Virgin tud/+ female with a germline	Night	0.773411
Virgin tud/+ female with a germline	Night	0.714047
Virgin tud/+ female with a germline	Night	0.124582
Virgin tud/+ female with a germline	Night	0.874582
Virgin tud/+ female with a germline	Night	0.481605
Virgin tud/+ female with a germline	Night	0.589465
Virgin tud/+ female with a germline	Night	0.602843
Virgin tud/+ female with a germline	Night	0.605351
Virgin tud/+ female with a germline	Night	0.593645
Virgin tud/+ female with a germline	Night	0.32107
Virgin tud/+ female with a germline	Night	0.666388
Virgin tud/+ female with a germline	Night	0.744147
Virgin tud/+ female with a germline	Night	0.506689
Virgin tud/+ female with a germline	Night	0.619565
Virgin tud/+ female with a germline	Night	0.773411
Virgin tud/+ female with a germline	Night	0.671405
Virgin tud/+ female with a germline	Night	0.744147
Virgin tud/+ female with a germline	Night	0.679766
Virgin tud/+ female with a germline	Night	0.66806
Virgin tud/+ female with a germline	Night	0.488294
Virgin tud/+ female with a germline	Night	0.629599
Virgin tud/+ female with a germline	Night	0.552676
Virgin tud/+ female with a germline	Night	0.776756
Virgin tud/+ female with a germline	Night	0.841973
Virgin tud/+ female with a germline	Night	0.435619
Virgin tud/+ female with a germline	Night	0.685619
Virgin tud/+ female with a germline	Night	0.883779
Virgin tud/+ female with a germline	Night	0.769231
Virgin tud/+ female with a germline	Night	0.68311
Virgin tud/+ female with a germline	Night	0.481605
Virgin tud/+ female with a germline	Night	0.284281
Virgin tud/+ female with a germline	Night	0.851171
Virgin tud/+ female with a germline	Night	0.556856
Virgin tud/+ female with a germline	Night	0.0886288
Virgin tud/+ female with a germline	Night	0.674749
Virgin tud/+ female with a germline	Night	0.381271
Virgin tud/+ female with a germline	Night	0.316054
Virgin tud/+ female with a germline	Night	0.530936
Virgin tud/+ female with a germline	Night	0.469064
Virgin tud/+ female with a germline	Night	0.901338
Virgin tud/+ female with a germline	Night	0.88796
Virgin tud/+ female with a germline	Night	0.673913
Virgin tud/+ female with a germline	Night	0.730769
Virgin tud/+ female with a germline	Night	0.80602
Virgin tud/+ female with a germline	Night	0.624582
Virgin tud/+ female with a germline	Night	0.778428
Virgin tud/+ female with a germline	Night	0.743311
Virgin tud/+ female with a germline	Night	0.611204
White Canton S female mated to white Canton S male	Night	0.422241
White Canton S female mated to white Canton S male	Night	0.639632
White Canton S female mated to white Canton S male	Night	0.620401
White Canton S female mated to white Canton S male	Night	0.535953
White Canton S female mated to white Canton S male	Night	0.70903
White Canton S female mated to white Canton S male	Night	0.25
White Canton S female mated to white Canton S male	Night	0.231605
White Canton S female mated to white Canton S male	Night	0.454849
White Canton S female mated to white Canton S male	Night	0.522575
White Canton S female mated to white Canton S male	Night	0.668896
White Canton S female mated to white Canton S male	Night	0.570234
White Canton S female mated to white Canton S male	Night	0.371237
White Canton S female mated to white Canton S male	Night	0.373746
White Canton S female mated to white Canton S male	Night	0.411371
White Canton S female mated to white Canton S male	Night	0.688127
White Canton S female mated to white Canton S male	Night	0.889632
White Canton S female mated to white Canton S male	Night	0.704849
White Canton S female mated to white Canton S male	Night	0.454849
White Canton S female mated to white Canton S male	Night	0.255853
White Canton S female mated to white Canton S male	Night	0.752508
White Canton S female mated to white Canton S male	Night	0.312709
White Canton S female mated to white Canton S male	Night	0.559365
White Canton S female mated to white Canton S male	Night	0.580268
White Canton S female mated to white Canton S male	Night	0.225753
White Canton S female mated to white Canton S male	Night	0.54097
White Canton S female mated to white Canton S male	Night	0.663043
White Canton S female mated to white Canton S male	Night	0.656355
White Canton S female mated to white Canton S male	Night	0.130435
White Canton S female mated to white Canton S male	Night	0.491639
White Canton S female mated to white Canton S male	Night	0.472408
White Canton S female mated to white Canton S male	Night	0.755853
White Canton S female mated to white Canton S male	Night	0.547659
White Canton S female mated to white Canton S male	Night	0.380435
White Canton S female mated to white Canton S male	Night	0.29097
White Canton S female mated to white Canton S male	Night	0.385452
White Canton S female mated to white Canton S male	Night	0.878763
White Canton S female mated to white Canton S male	Night	0.722408
White Canton S female mated to white Canton S male	Night	0.477425
White Canton S female mated to white Canton S male	Night	0.548495
White Canton S female mated to white Canton S male	Night	0.322742
White Canton S female mated to white Canton S male	Night	0.62709
White Canton S female mated to white Canton S male	Night	0.717391
White Canton S female mated to white Canton S male	Night	0.533445
White Canton S female mated to white Canton S male	Night	0.523411
White Canton S female mated to white Canton S male	Night	0.270067
White Canton S female mated to white Canton S male	Night	0.516722
White Canton S female mated to white Canton S male	Night	0.309365
White Canton S female mated to white Canton S male	Night	0.586957
White Canton S female mated to white Canton S male	Night	0.77592
White Canton S female mated to white Canton S male	Night	0.665552
White Canton S female mated to white Canton S male	Night	0.795987
White Canton S female mated to white Canton S male	Night	0.271739
White Canton S female mated to white Canton S male	Night	0.566054
White Canton S female mated to white Canton S male	Night	0.310201
White Canton S female mated to white Canton S male	Night	0.576923
White Canton S female mated to white Canton S male	Night	0.63796
White Canton S female mated to white Canton S male	Night	0.621237
White Canton S female mated to white Canton S male	Night	0.75
White Canton S female mated to white Canton S male	Night	0.674749
White Canton S female mated to white Canton S male	Night	0.575251
White Canton S female mated to white Canton S male	Night	0.364548
White Canton S female mated to white Canton S male	Night	0.299331
White Canton S female mated to white Canton S male	Night	0.244983
White Canton S female mated to white Canton S male	Night	0.30602
White Canton S female mated to white Canton S male	Night	0.403846
White Canton S female mated to white Canton S male	Night	0.457358
White Canton S female mated to white Canton S male	Night	0.749164
White Canton S female mated to white Canton S male	Night	0.278428
White Canton S female mated to white Canton S male	Night	0.455686

## Sheet: ANOVA Summary Sleep results
ANOVA results for sleep behavioral analyses (Figure 4A and B and Figure S6)
Female strains: wCS, Ber, and tud/+ with a germline (Figure S6)
Effect of strain and mating
Daytime Sleep
Female strain	P = 0.0001
Mating	P < 0.0001
Female Strain * Mating	P < 0.0001
Nighttime Sleep
Female strain	P < 0.0001
Mating	P < 0.0001
Female Strain * Mating	P < 0.0001
Female strains: virgin Berlin, Berlin mated to tud/+ with a germline males, and Berlin mated to tud/+ with no germline (Figure 4A and B, green bars)
Effect of Mating
Daytime Sleep
Mating	P = 0.0174
Nighttime Sleep
Mating	P < 0.0001
Female strains: virgin tud/+ with a germline, virgin tud/+ with no germline, tud/+ with a germline mated to Berlin males, tud/+ with no germline mated to Berlin males (Figure 4A and B, purple bars)
Effect of female germline and mating
Daytime Sleep
Mating	P = 0.3074
Female germline	P < 0.0001
Mating * Female Germline	P = 0.0007
Nighttime Sleep
Mating	P = 0.0707
Female germline	P = 0.0383
Mating * Female Germline	P < 0.0001

## Sheet: FigS6A_Day
To determine the effect of mating and strain on sleep, the sleep data from virgin and mated female flies of the Berlin, white Canton S, and tud/+ genetic background were analyzed. We performed a two-way ANOVA using mating (virgin or mated) and strain (Berlin, white Canton S, and tud/+) as factors
Effects of Mating and Strain
Analysis of Variance
Source	DF	Sum of Squares	Mean Square	F Ratio
Model	5	3.59194	0.718388	53.6276
Error	406	5.43872	0.013396	Prob > F
C. Total	411	9.03066		<.0001
Parameter Estimates
Term	Estimate	Std Error	t Ratio	Prob>|t|
Intercept	0.25111	0.005703	44.03	<.0001
Mating[Mated]	-0.022187	0.005703	-3.89	0.0001
Strain[Ber]	-0.06289	0.008055	-7.81	<.0001
Strain[CS]	0.111428	0.00804	13.86	<.0001
Mating[Mated]*Strain[Ber]	0.0505308	0.008055	6.27	<.0001
Mating[Mated]*Strain[CS]	-0.054699	0.00804	-6.8	<.0001
Effects Tests
Source	Nparm	DF	Sum of Squares	F Ratio	Prob > F
Mating	1	1	0.20276	15.136	0.0001
Strain	2	2	2.58932	96.6461	<.0001
Mating*Strain	2	2	0.770484	28.7583	<.0001
Tukey-HSD All-Pairs
	Virgin wCS	Virgin Berlin	Virgin tud/+ (germ)	Mated wCS	Mated Berlin	Mated tud/+ (germ)
Virgin wCS	x	<0.0001	<0.0001	<0.0001	<0.0001	<0.0001
Virgin Berlin		x	0.0276	<0.0001	0.0482	0.8106
Virgin tud/+ (germ)			x	0.0144	1	0.4612
Mated wCS				x	0.007	<0.0001
Mated Berlin					x	0.5906
Mated tud/+ (germ)						x

## Sheet: FigS6B_Night
To determine the effect of mating and strain on sleep, the sleep data from virgin and mated female flies of the Berlin, white Canton S, and tud/+ genetic background were analyzed. We performed a two-way ANOVA using mating (virgin or mated) and strain (Berlin, white Canton S, and tud/+) as factors
Effect of Strain and Mating
Analysis of Variance
Source	DF	Sum of Squares	Mean Square	F Ratio
Model	5	4.43192	0.886385	35.6981
Error	406	10.081	0.02483	Prob > F
C. Total	411	14.5129		<.0001
Parameter Estimates
Term	Estimate	Std Error	t Ratio	Prob>|t|
Intercept	0.547786	0.007764	70.55	<.0001
Mating[Mated]	-0.039677	0.007764	-5.11	<.0001
Female_Strain[Ber]	-0.107257	0.010967	-9.78	<.0001
Female_Strain[CS]	0.0692315	0.010947	6.32	<.0001
Mating[Mated]*Female_Strain[Ber]	0.0716786	0.010967	6.54	<.0001
Mating[Mated]*Female_Strain[CS]	-0.065223	0.010947	-5.96	<.0001
Effects Test
Source	Nparm	DF	Sum of Squares	F Ratio	Prob > F
Mating	1	1	0.64844	26.1152	<.0001
Female_Strain	2	2	2.4486	49.3073	<.0001
Mating*Female_Strain	2	2	1.30577	26.2942	<.0001
Tukey-HSD All-Pairs
	Virgin wCS	Virgin Berlin	Virgin tud/+ (germ)	Mated wCS	Mated Berlin	Mated tud/+ (germ)
Virgin wCS	x	<0.0001	0.0117	<0.0001	<0.0001	<0.0001
Virgin Berlin		x	<0.0001	0.0017	0.1638	<0.0001
Virgin tud/+ (germ)			x	0.0002	<0.0001	0.0095
Mated wCS				x	0.6835	0.9099
Mated Berlin					x	0.131
Mated tud/+ (germ)						x

## Sheet: Fig4A_Day
ANOVA Results shown in Figure 4
To determine the effect of the receipt of sperm, we analyzed sleep data from virgin Berlin females, Berlin females mated to males with sperm, and Berlin females mated to males without sperm. We performed a one-way ANOVA using mating as our factor (virgin, mated, mated with no sperm).								To test the effects of mating and the female germline on sleep, we examined virgin and mated tud/+ females with a germline and virgin and mated tud/+ females without a germline. We used a two-way ANOVA to test the effect of mating (virgin and mated), female germline (germline and no germline), as well as, the interaction of mating and female germline on sleep.
We compared sleep between virgin Berlin females and Berlin females mated to tud/+ males with sperm and without sperm and found a significant effect of mating during daytime sleep P=0.0174								We found mating alone did not have a significant effect on daytime sleep (P=0.3074), but both the female germline (P<0.0001) and the interaction of mating and the female germline (P=0.0007) were both significant.
Effect of the receipt of Sperm on daytime sleep (Green Bars)								Effect of Mating and the Female Germline on daytime sleep (Purple Bars)
Analysis of Variance								Analysis of Variance
Source	DF	Sum of Squares	Mean Square	F Ratio				Source	DF	Sum of Squares	Mean Square	F Ratio
Model	2	0.123781	0.061891	4.1347				Model	3	0.82773	0.27591	18.5502
Error	204	3.05363	0.014969	Prob > F				Error	265	3.94152	0.014874	Prob > F
C. Total	206	3.17741		0.0174				C. Total	268	4.76925		<.0001
Parameter Estimates								Parameter Estimates
								Term	Estimate	Std Error	t Ratio	Prob>|t|
Term	Estimate	Std Error	t Ratio	Prob>|t|				Intercept	0.250636	0.007438	33.7	<.0001
Intercept	0.189547	0.008504	22.29	<.0001				Mating[Mated]	0.0076069	0.007438	1.02	0.3074
Mating[Mated]	0.0302324	0.012071	2.5	0.013				Female_Germline[No]	0.0480633	0.007438	6.46	<.0001
Mating[Mated_NoSperm]	-0.000562	0.012026	-0.05	0.9628				Mating[Mated]*Female_Germline[No]	0.025626	0.007438	3.45	0.0007
Effect Tests								Effect Tests
Source	Nparm	DF	Sum of Squares	F Ratio	Prob > F			Source	Nparm	DF	Sum of Squares	F Ratio	Prob > F
Mating	2	2	0.123781	4.1347	0.0174			Mating	1	1	0.015558	1.046	0.3074
								Female_Germline	1	1	0.621107	41.7589	<.0001
Tukey-HSD All Pairs								Mating*Female_Germline	1	1	0.176563	11.8709	0.0007
	Virgin Berlin	Berlin mated Sperm	Berlin mated No sperm
Virgin Berlin	x	0.0124	0.3415					Tukey-HSD All Pairs
Berlin mated Sperm		x	0.3061						Virgin tud/+ (germ)	Virgin tud/+ (no germ)	Mated tud/+ (germ)	Mated tud/+ (no germ)
Berlin mated No sperm			x					Virgin tud/+ (germ)	x	0.1515	0.317	<0.0001
								Virgin tud/+ (no germ)		x	0.0009	0.0097
								Mated tud/+ (germ)			x	<0.0001
								Mated tud/+ (no germ)				x

## Sheet: Fig4B_Night
ANOVA results
To determine the effect of the receipt of sperm, we analyzed sleep data from virgin Berlin females, Berlin females mated to males with sperm, and Berlin females mated to males without sperm. We performed a one-way ANOVA using mating as our factor (virgin, mated, mated with no sperm).								To test the effects of mating and the female germline on sleep, we examined virgin and mated tud/+ females with a germline and virgin and mated tud/+ females without a germline. We used a two-way ANOVA to test the effect of mating (virgin and mated), female germline (germline and no germline), as well as, the interaction of mating and female germline on sleep.
We compared sleep between virgin Berlin females and Berlin females mated to tud/+ males with sperm and without sperm and found a significant effect of mating during nighttime sleep P<0.0001								We found mating alone did not have a significant effect on nighttime sleep (P=0.0707), but both the female germline (P=0.0383) and the interaction of mating and the female germline (P<0.0001) were both significant.
Effect of the receipt of Sperm on night time sleep (Green Bars)								Effect of Mating and the Female Germline on nighttime sleep (Purple Bars)
Analysis of Variance								Analysis of Variance
Source	DF	Sum of Squares	Mean Square	F Ratio				Source	DF	Sum of Squares	Mean Square	F Ratio
Model	2	0.598225	0.299112	12.6394				Model	3	1.36989	0.45663	15.779
Error	204	4.82769	0.023665	Prob > F				Error	265	7.66885	0.028939	Prob > F
C. Total	206	5.42591		<.0001				C. Total	268	9.03874		<.0001
Parameter Estimates								Parameter Estimates
Term	Estimate	Std Error	t Ratio	Prob>|t|				Term	Estimate	Std Error	t Ratio	Prob>|t|
Intercept	0.483398	0.010693	45.21	<.0001				Intercept	0.607415	0.010375	58.55	<.0001
Mating[Mated]	0.0477971	0.015177	3.15	0.0019				Mating[Mated]	0.0188293	0.010375	1.81	0.0707
Mating[Mated_NoSperm]	0.0270721	0.015122	1.79	0.0749				Female_Germline[No]	0.0216037	0.010375	2.08	0.0383
								Mating[Mated]*Female_Germline[No]	0.0649623	0.010375	6.26	<.0001
Effects Test								Effects Test
Source	Nparm	DF	Sum of Squares	F Ratio	Prob > F			Source	Nparm	DF	Sum of Squares	F Ratio	Prob > F
Mating	2	2	0.598225	12.6394	<.0001			Mating	1	1	0.0953253	3.294	0.0707
								Female_Germline	1	1	0.125487	4.3362	0.0383
								Mating*Female_Germline	1	1	1.13465	39.2083	<.0001
Tukey-HSD All Pairs
	Virgin Berlin	Berlin mated Sperm	Berlin mated No sperm
Virgin Berlin	x	<0.0001	0.0004					Tukey-HSD All Pairs
Berlin mated Sperm		x	0.7106						Virgin tud/+ (germ)	Virgin tud/+ (no germ)	Mated tud/+ (germ)	Mated tud/+ (no germ)
Berlin mated No sperm			x					Virgin tud/+ (germ)	x	0.0193	0.0098	0.0303
								Virgin tud/+ (no germ)		x	0.9976	<0.0001
								Mated tud/+ (germ)			x	<0.0001
								Mated tud/+ (no germ)				x

## Sheet: Re-mating Results
Condition	% Remating
Virgin Berlin	1
Virgin Berlin	1
Virgin Berlin	1
Virgin Berlin	1
Virgin Berlin	1
Virgin Berlin	1
Virgin Berlin	1
Berlin mated to tud/+ male with a germline 1-day post-mating	0.428571
Berlin mated to tud/+ male with a germline 1-day post-mating	0.285714
Berlin mated to tud/+ male with a germline 1-day post-mating	0.2
Berlin mated to tud/+ male with a germline 1-day post-mating	0.25
Berlin mated to tud/+ male with a germline 1-day post-mating	0.2
Berlin mated to tud/+ male with a germline 1-day post-mating	0.375
Berlin mated to tud/+ male with a germline 1-day post-mating	0.285714
Berlin mated to tud/+ male with no germline 1-day post-mating	0.555556
Berlin mated to tud/+ male with no germline 1-day post-mating	0.833333
Berlin mated to tud/+ male with no germline 1-day post-mating	0.875
Berlin mated to tud/+ male with no germline 1-day post-mating	1
Berlin mated to tud/+ male with no germline 1-day post-mating	0.5
Berlin mated to tud/+ male with no germline 1-day post-mating	0.8
Berlin mated to tud/+ male with no germline 1-day post-mating	0.888889
Berlin mated to tud/+ male with a germline 3-days post-mating	0.444444
Berlin mated to tud/+ male with a germline 3-days post-mating	0.142857
Berlin mated to tud/+ male with a germline 3-days post-mating	0.375
Berlin mated to tud/+ male with a germline 3-days post-mating	0.5
Berlin mated to tud/+ male with a germline 3-days post-mating	0.875
Berlin mated to tud/+ male with a germline 3-days post-mating	0.888889
Berlin mated to tud/+ male with a germline 3-days post-mating	0.142857
Berlin mated to tud/+ male with no germline 3-days post-mating	0.9
Berlin mated to tud/+ male with no germline 3-days post-mating	1
Berlin mated to tud/+ male with no germline 3-days post-mating	0.875
Berlin mated to tud/+ male with no germline 3-days post-mating	1
Berlin mated to tud/+ male with no germline 3-days post-mating	0.75
Berlin mated to tud/+ male with no germline 3-days post-mating	1
Berlin mated to tud/+ male with no germline 3-days post-mating	0.888889
Berlin mated to tud/+ male with no germline 3-days post-mating	1
Virgin tud/+ with germline	1
Virgin tud/+ with germline	1
Virgin tud/+ with germline	1
Virgin tud/+ with germline	1
Virgin tud/+ with germline	1
Virgin tud/+ with germline	0.888889
Virgin tud/+ with germline	1
tud/+ with germline mated to Berlin male 1-day post-mating	0.142857
tud/+ with germline mated to Berlin male 1-day post-mating	0.888889
tud/+ with germline mated to Berlin male 1-day post-mating	0.4
tud/+ with germline mated to Berlin male 1-day post-mating	0.142857
tud/+ with germline mated to Berlin male 1-day post-mating	0
tud/+ with germline mated to Berlin male 1-day post-mating	1
tud/+ with germline mated to Berlin male 1-day post-mating	0.555556
tud/+ with germline mated to Berlin male 1-day post-mating	0.5
tud/+ with germline mated to Berlin male 1-day post-mating	0.666667
tud/+ with germline mated to Berlin male 1-day post-mating	0.555556
tud/+ with germline mated to Berlin male 1-day post-mating	0.375
tud/+ with germline mated to Berlin male 3-days post-mating	0.75
tud/+ with germline mated to Berlin male 3-days post-mating	0.571429
tud/+ with germline mated to Berlin male 3-days post-mating	0.375
tud/+ with germline mated to Berlin male 3-days post-mating	0.6
tud/+ with germline mated to Berlin male 3-days post-mating	0.833333
tud/+ with germline mated to Berlin male 3-days post-mating	0.833333
tud/+ with germline mated to Berlin male 3-days post-mating	0.4
tud/+ with germline mated to Berlin male 3-days post-mating	1
tud/+ with germline mated to Berlin male 3-days post-mating	1
Virgin tud/+ no germline	1
Virgin tud/+ no germline	1
Virgin tud/+ no germline	1
Virgin tud/+ no germline	1
Virgin tud/+ no germline	1
Virgin tud/+ no germline	1
tud/+ no germline mated to Berlin male 1-day post-mating	0.111111
tud/+ no germline mated to Berlin male 1-day post-mating	0.5
tud/+ no germline mated to Berlin male 1-day post-mating	0.444444
tud/+ no germline mated to Berlin male 1-day post-mating	0.555556
tud/+ no germline mated to Berlin male 1-day post-mating	0
tud/+ no germline mated to Berlin male 1-day post-mating	0.285714
tud/+ no germline mated to Berlin male 1-day post-mating	0.111111
tud/+ no germline mated to Berlin male 1-day post-mating	0.7
tud/+ no germline mated to Berlin male 3-days post-mating	0.444444
tud/+ no germline mated to Berlin male 3-days post-mating	0.25
tud/+ no germline mated to Berlin male 3-days post-mating	0.571429
tud/+ no germline mated to Berlin male 3-days post-mating	1
tud/+ no germline mated to Berlin male 3-days post-mating	0.714286
tud/+ no germline mated to Berlin male 3-days post-mating	0.5
tud/+ no germline mated to Berlin male 3-days post-mating	0.3
tud/+ no germline mated to Berlin male 3-days post-mating	0.833333
tud/+ no germline mated to Berlin male 3-days post-mating	0.857143

## Sheet: Summary ANOVA Re-mating Results
ANOVA results for re-mating behavioral analyses (Figure 4D)
Female strains: tud/+ with a germline and tud/+ without a germline (purple bars)
Effect of female germline
Female germline	P = 0.311
Female strain: Berlin (green bars)
Effect of male germline
Male germline	P <.0001

[truncated: 1 more sheets: Fig4D_remating]
