# Supplementary material
Source: publisher figshare collection journal article supplement (https://gsajournals.figshare.com/articles/dataset/_/11317307)
Supplement: Supplementary file 1 [file 1 › TableS7_RankTransformedRemating.xlsx]

## Sheet: Ranked Female Remating
Genotype (Replicate)	Assay Block	Vial in Block	# females used to calculate remating rate	Remating Rate	Rank
r101	5	5	10	0	49
r101	5	3	10	0.1	492
r101	5	4	10	0.1	493
r101	5	6	10	0.1	494
r101	5	1	11	0.181818	693
r101	5	2	9	0.444444	960
r101(2)	17	5	8	0	303
r101(2)	17	6	10	0	304
r101(2)	17	1	9	0.111111	610
r101(2)	17	4	11	0.181818	712
r101(3)	25	2	9	0	395
r101(3)	25	3	9	0	396
r101(3)	25	4	9	0	397
r101(3)	25	5	10	0	398
r101(3)	25	6	9	0	399
r101(3)	25	1	8	0.125	677
r109	5	2	8	0.125	642
r109	5	6	8	0.125	643
r109	5	4	8	0.25	817
r109	5	5	8	0.625	1032
r129	13	6	8	0	200
r129	13	3	11	0.0909091	456
r129	13	4	9	0.111111	588
r129	13	5	9	0.111111	589
r129	13	1	8	0.125	657
r136	11	2	9	0	141
r136	11	4	9	0	142
r136	11	5	10	0	143
r136	11	6	10	0	144
r136	11	3	9	0.111111	582
r142(3)	27	3	8	0	411
r142(3)	27	1	8	0.125	681
r142(3)	27	2	11	0.181818	719
r142(3)	27	5	8	0.25	852
r142(3)	27	4	11	0.272727	865
r145	13	1	9	0	210
r145	13	2	10	0	211
r145	13	5	8	0	212
r145	13	4	9	0.444444	963
r149	5	1	9	0	55
r149	5	3	11	0	56
r149	5	4	9	0	57
r149	5	5	10	0.2	726
r153	8	5	11	0	75
r153	8	6	9	0.111111	572
r153	8	2	9	0.222222	776
r153	8	4	8	0.25	825
r158	12	2	10	0	150
r158	12	4	11	0	151
r158	12	1	10	0.1	515
r158	12	3	9	0.111111	583
r158	12	5	9	0.111111	584
r158	12	6	9	0.222222	783
r169	18	2	11	0	323
r169	18	6	11	0	324
r169	18	4	11	0.0909091	463
r169	18	3	9	0.111111	612
r176	18	4	9	0	321
r176	18	5	10	0	322
r176	18	2	9	0.111111	611
r177	20	3	10	0	354
r177	20	4	10	0	355
r177	20	5	8	0	356
r177	20	2	8	0.125	672
r181	11	6	10	0	132
r181	11	3	11	0.0909091	452
r181	11	4	10	0.1	511
r181	11	1	9	0.111111	580
r181	11	2	9	0.111111	581
r181	11	5	9	0.333333	902
r189	11	1	9	0	133
r189	11	2	8	0	134
r189	11	3	9	0	135
r189	11	6	9	0	136
r189(2)	31	2	10	0	427
r189(2)	31	6	9	0	428
r189(2)	31	3	8	0.125	685
r189(2)	31	4	8	0.125	686
r195	11	2	8	0	147
r195	11	3	8	0	148
r195	11	6	8	0	149
r195	11	4	10	0.1	513
r195	11	5	10	0.1	514
r208	16	2	10	0	273
r208	16	4	11	0	274
r208	16	3	11	0.0909091	460
r208	16	5	10	0.1	535
r208	16	6	9	0.111111	605
r208	16	1	9	0.444444	968
r208(2)	20	1	10	0	343
r208(2)	20	2	10	0	344
r208(2)	20	3	9	0	345
r208(2)	20	4	11	0	346
r208(2)	20	5	11	0	347
r208(2)	20	6	11	0	348
r21	2	2	9	0	6
r21	2	3	10	0	7
r21	2	4	8	0	8
r21	2	6	8	0	9
r217	12	2	10	0	155
r217	12	1	11	0.0909091	454
r217	12	6	10	0.2	737
r217	12	4	9	0.222222	784
r217	12	3	10	0.6	1023
r223	16	4	11	0	271
r223	16	6	11	0	272
r223	16	1	8	0.25	836
r223	16	3	9	0.333333	913
r223	16	5	9	0.333333	914
r227	10	1	8	0	114
r227	10	2	10	0	115
r227	10	4	10	0.1	508
r227	10	6	9	0.222222	781
r227(2)	11	1	9	0	116
r227(2)	11	4	9	0	117
r227(2)	11	6	11	0.0909091	450
r227(2)	11	3	10	0.1	509
r227(2)	11	5	9	0.111111	579
r227(2)	11	2	8	0.25	826
r228	10	1	8	0	107
r228	10	3	10	0	108
r228	10	4	9	0	109
r228	10	5	10	0	110
r228	10	6	10	0.2	734
r228	10	2	9	0.222222	780
r228(2)	11	1	8	0	118
r228(2)	11	2	8	0	119
r228(2)	11	4	10	0	120
r228(2)	11	6	9	0	121
r228(2)	11	5	11	0.0909091	451
r228(2)	11	3	9	0.222222	782
r235	27	4	10	0.1	550
r235	27	6	9	0.111111	631
r235	27	2	10	0.2	759
r235	27	3	9	0.555556	1017
r237	27	1	8	0	409
r237	27	5	8	0	410
r237	27	2	10	0.1	551
r237	27	6	11	0.181818	718
r237	27	4	11	0.272727	864
r239	11	2	10	0	122
r239	11	3	10	0	123
r239	11	4	11	0	124
r239	11	6	11	0	125
r239	11	5	8	0.125	655
r239(2)	23	2	9	0	377
r239(2)	23	4	9	0	378
r239(2)	23	5	11	0	379
r239(2)	23	6	11	0.0909091	471
r239(2)	23	1	9	0.111111	628
r239(2)	23	3	8	0.125	675
r256	17	1	9	0	313
r256	17	3	10	0	314
r256	17	4	9	0	315
r256	17	5	8	0	316
r256	17	6	11	0	317
r256	17	2	8	0.625	1034
r256(2)	26	1	11	0	403
r256(2)	26	6	8	0.25	849
r256(2)	26	5	11	0.272727	863
r256(2)	26	3	10	0.3	887
r256(2)	26	2	9	0.333333	919
r256(2)	26	4	10	0.4	955
r272	27	4	10	0	413
r272	27	5	9	0	414
r272	27	1	9	0.222222	807
r272	27	3	8	0.25	853
r272	27	6	8	0.25	854
r28	14	1	9	0	230
r28	14	2	8	0	231
r28	14	4	10	0	232
r28	14	6	10	0.2	744
r28	14	3	9	0.222222	793
r28	14	5	9	0.333333	908
r280	11	1	10	0	137
r280	11	2	10	0	138
r280	11	3	8	0	139
r280	11	5	8	0	140
r280	11	4	10	0.1	512
r280	11	6	8	0.25	828
r280(2)	12	1	9	0	156
r280(2)	12	3	8	0	157
r280(2)	12	4	8	0	158
r280(2)	12	5	9	0	159
r287	7	7	8	0.125	648
r287	7	1	9	0.222222	773
r287	7	4	9	0.333333	900
r287	7	3	8	0.5	995
r301	30	2	8	0	420
r301	30	4	9	0	421
r301	30	5	9	0.111111	633
r304	3	2	8	0	34
r304	3	4	9	0.222222	766
r304	3	1	8	0.25	814
r304	3	6	9	0.333333	894
r304(2)	6	3	9	0.111111	570
r309	10	1	8	0	111
r309	10	2	9	0	112
r309	10	5	10	0	113
r309	10	3	10	0.1	507
r309	10	4	11	0.181818	698
r309(2)	17	3	8	0	282
r309(2)	17	4	9	0	283
r309(2)	17	5	11	0.0909091	461
r309(2)	17	1	10	0.1	536
r309(2)	17	6	9	0.111111	607
r309(2)	17	2	8	0.25	838
r310	18	1	10	0	332
r310	18	4	9	0	333
r310	18	3	9	0.111111	615
r310	18	5	9	0.111111	616
r310	18	2	8	0.25	840
r313	17	2	9	0	284
r313	17	3	10	0	285
r313	17	4	10	0	286
r313	17	1	10	0.1	537
r315	3	2	10	0	31
r315	3	4	10	0	32
r315	3	5	11	0	33
r315	3	6	9	0.111111	562
r315	3	1	9	0.444444	957
r315(2)	9	2	10	0	82
r315(2)	9	4	9	0	83
r315(2)	9	5	11	0	84
r315(2)	9	6	10	0	85
r315(2)	9	1	10	0.1	503
r315(2)	9	3	9	0.111111	575
r315(3)	17	3	11	0	309
r315(3)	17	4	10	0	310
r315(3)	17	5	8	0	311
r315(3)	17	6	10	0	312
r315(3)	17	1	11	0.0909091	462
r325	12	1	9	0	183
r325	12	2	8	0	184
r325	12	4	9	0	185
r325	12	5	10	0.1	523
r325	12	6	10	0.2	740
r335	3	3	10	0	29
r335	3	4	10	0	30
r335	3	2	10	0.1	486
r338	13	3	11	0	214
r338	13	6	11	0.181818	702
r338	13	2	9	0.222222	787
r340	7	3	11	0.272727	857
r340(2)	27	6	10	0.1	549
r340(2)	27	3	11	0.181818	717
r340(2)	27	4	9	0.444444	978
r340(2)	27	1	11	0.727273	1048
r350	18	1	9	0	325
r350	18	3	9	0	326
r350	18	5	9	0	327
r350	18	2	9	0.111111	613
r350	18	6	9	0.111111	614
r350	18	4	9	0.444444	971
r352	4	4	8	0	44
r352	4	5	10	0.1	491
r352	4	3	9	0.333333	899
r352	4	6	9	0.555556	1010
r352	4	7	8	0.625	1030
r352	4	2	8	0.875	1064
r356	17	1	10	0	299
r356	17	3	9	0	300
r356	17	4	9	0	301
r356	17	5	8	0	302
r357	3	3	8	0	25
r357	3	5	10	0	26
r357	3	1	10	0.1	485
r357	3	2	9	0.111111	561
r357	3	6	9	0.555556	1008
r359	13	3	10	0	203
r359	13	4	10	0	204
r359	13	5	8	0.125	658
r359	13	6	8	0.125	659
r359	13	1	10	0.6	1024
r359	13	2	10	0.6	1025
r360	1	1	10	0	5
r360	1	2	9	0.111111	557
r360(2)	7	2	8	0.25	821
r360(2)	7	5	8	0.25	822
r360(2)	7	7	8	0.5	994
r360(2)	7	4	10	0.7	1046
r360(2)	7	6	10	0.9	1073
r361	12	1	10	0	169
r361	12	5	11	0.0909091	455
r361	12	3	10	0.1	518
r361	12	2	9	0.111111	586
r361	12	4	9	0.222222	785
r361	12	6	9	0.222222	786
r362	3	6	10	0	28
r362	3	4	10	0.2	721
r362	3	3	8	0.25	813
r362	3	2	8	0.375	922
r362	3	1	10	0.5	990
r365	12	1	9	0	175
r365	12	2	11	0	176
r365	12	3	8	0	177
r365	12	4	10	0	178
r365	12	5	11	0	179
r365	12	6	11	0	180
r365(2)	14	2	9	0	223
r365(2)	14	6	8	0.5	997
r365(2)	14	1	9	0.555556	1013
r365(2)	14	4	8	0.875	1066
r365(3)	24	1	10	0	385
r365(3)	24	2	9	0	386
r365(3)	24	3	9	0	387
r365(3)	24	4	10	0	388
r365(3)	24	5	8	0	389
r367	5	4	11	0	50
r367	5	6	9	0.111111	567
r367	5	2	10	0.6	1021
r367(2)	12	1	10	0	173
r367(2)	12	6	10	0	174
r367(2)	12	2	10	0.1	519
r367(2)	12	3	10	0.1	520
r367(2)	12	4	10	0.1	521
r367(2)	12	5	8	0.25	830
r370	27	5	10	0.1	552
r370	27	4	9	0.222222	808
r370	27	1	10	0.3	890
r370	27	6	9	0.888889	1071
r371	15	1	10	0	247
r371	15	6	10	0.3	877
r371	15	3	9	0.444444	965
r371	15	5	9	0.888889	1070
r373	9	1	10	0	90
r373	9	4	9	0	91
r373	9	5	8	0	92
r373	9	6	9	0	93
r373	9	2	9	0.111111	576
r374	16	2	8	0.125	670
r375	2	5	8	0.875	1063
r375(2)	3	2	8	0	27
r375(2)	3	1	10	0.3	870
r375(3)	6	6	8	0.125	646
r375(3)	6	2	10	0.4	941
r375(3)	6	5	9	0.666667	1039
r375(4)	9	2	8	0	86
r375(4)	9	4	9	0.222222	777
r375(4)	9	5	9	0.333333	901
r378	12	1	8	0	165
r378	12	3	10	0	166
r378	12	4	10	0	167
r378	12	6	9	0	168
r378	12	2	9	0.333333	903
r379	20	1	10	0	349
r379	20	2	8	0	350
r379	20	4	9	0	351
r379	20	5	9	0	352
r379	20	3	11	0.0909091	467
r38	12	2	10	0	170
r38	12	3	11	0	171
r38	12	5	9	0	172
r38	12	4	11	0.181818	701
r38	12	1	10	0.2	738
r38	12	6	8	0.25	829
r380	22	4	11	0	374
r380	22	5	10	0.1	544
r380	22	2	10	0.3	885
r380(2)	28	3	8	0.375	938
r380(2)	28	6	9	0.444444	980
r380(2)	28	5	8	0.75	1054
r380(3)	30	2	9	0	423
r380(3)	30	1	8	0.5	1004
r381	12	1	11	0	186
r381	12	2	10	0	187
r381	12	4	10	0	188
r381	12	6	9	0	189
r381	12	3	10	0.1	524
r381(2)	23	4	9	0	380
r381(2)	23	5	8	0	381
r381(2)	23	6	10	0	382
r381(2)	23	1	10	0.1	546
r381(2)	23	3	8	0.125	676
r381(2)	23	2	9	0.222222	802
r382	12	1	9	0	164
r382	12	2	8	0.125	656
r382	12	4	11	0.181818	700
r383	32	1	10	0	433
r383	32	5	9	0	434
r383	32	4	10	0.1	556
r383	32	3	8	0.125	688
r386	16	2	10	0	275
r386	16	3	9	0	276
r386	16	5	9	0	277
r386	16	6	10	0	278
r386	16	1	8	0.125	668
r386	16	4	8	0.375	930
r387	7	2	10	0	69
r387	7	3	8	0.125	649
r387(2)	27	3	9	0	408
r387(2)	27	2	11	0.0909091	474
r387(2)	27	5	10	0.2	760
r387(2)	27	4	9	0.222222	805
r387(2)	27	6	10	0.3	889
r391	15	1	9	0	239
r391	15	5	10	0	240
r391	15	4	9	0.111111	597
r391	15	6	9	0.111111	598
r391	15	2	9	0.222222	794
r392	5	4	11	0	62
r392	5	6	8	0	63
r392	5	5	11	0.0909091	447
r392	5	2	10	0.1	496
r392	5	3	11	0.181818	695
r392	5	1	10	0.2	728
r396	12	1	9	0	152
r396	12	5	11	0	153
r396	12	6	10	0	154
r396	12	3	10	0.1	516
r396	12	4	10	0.1	517
r396	12	2	11	0.181818	699
r398	4	2	10	0	47
r398	4	3	9	0	48
r398	4	7	9	0.222222	770
r398	4	6	8	0.25	816
r398	4	4	8	0.625	1031
r399	20	5	10	0	341
r399	20	6	10	0	342
r399	20	1	9	0.111111	618
r399	20	3	9	0.111111	619
r399	20	2	10	0.3	881
r409	12	3	11	0	181
r409	12	4	10	0	182
r409	12	5	10	0.1	522
r409	12	1	10	0.2	739
r426	12	4	8	0	190
r426	12	3	10	0.1	525
r426(2)	25	5	11	0	400
r426(2)	25	1	8	0.125	678
r426(2)	25	2	10	0.4	954
r426(2)	25	6	9	0.444444	977
r426(2)	25	4	8	0.625	1036
r427	22	4	10	0	371
r427	22	5	9	0	372
r427	22	2	9	0.111111	625
r427(2)	32	1	8	0.125	687
r437	17	3	9	0	297
r437	17	6	8	0	298
r437	17	4	9	0.111111	609
r440	16	1	10	0	269
r440	16	2	10	0	270
r440	16	6	9	0.111111	604
r440	16	3	11	0.272727	861
r440	16	4	9	0.333333	912
r441	27	4	9	0	407
r441	27	1	10	0.2	758
r441	27	2	8	0.25	851
r441	27	6	10	0.3	888
r441	27	3	10	0.4	956
r441	27	5	9	0.777778	1058
r443	12	1	9	0	191
r443	12	3	11	0	192
r443	12	4	11	0	193
r443	12	6	11	0	194
r443	12	2	10	0.1	526
r443	12	5	10	0.3	873
r443(2)	25	3	11	0	401
r443(2)	25	5	8	0	402
r443(2)	25	6	10	0.1	548
r443(2)	25	1	9	0.111111	630
r443(2)	25	4	8	0.125	679
r443(2)	25	2	9	0.222222	804
r476	11	2	9	0	146
r486	16	1	9	0	257
r486	16	2	10	0	258
r486	16	4	8	0	259
r486	16	5	9	0	260
r486	16	6	10	0	261
r486	16	3	10	0.1	534
r491	7	2	9	0.111111	571
r491	7	3	10	0.2	730
r491(2)	15	2	10	0	245
r491(2)	15	3	10	0	246
r491(2)	15	1	9	0.111111	601
r491(2)	15	4	8	0.125	663
r491(2)	15	5	10	0.2	746
r491(2)	15	6	9	0.444444	964
r502	10	1	10	0	102
r502	10	3	11	0	103
r502	10	4	9	0	104
r502	10	5	8	0	105
r502	10	2	9	0.111111	578
r502	10	6	10	0.2	733
r508	24	1	11	0	393
r508	24	3	11	0	394
r508	24	2	10	0.1	547
r508	24	4	10	0.3	886
r517	2	2	8	0.5	987
r517	2	3	8	0.625	1027
r517	2	6	8	0.625	1028
r517	2	4	9	0.666667	1037
r517(2)	8	5	9	0	81
r517(2)	8	3	9	0.111111	574
r517(2)	8	4	10	0.2	731
r517(2)	8	6	10	0.3	872
r517(2)	8	1	9	0.777778	1056
r517(2)	8	2	10	0.8	1060
r535	13	3	10	0	213
r535	13	1	9	0.111111	591
r535	13	5	8	0.125	660
r535	13	2	10	0.4	943
r554	20	1	10	0	339
r554	20	3	10	0	340
r554	20	2	10	0.1	540
r554	20	4	8	0.25	843
r554	20	5	10	0.4	951
r554	20	6	9	0.444444	972
r563	5	4	10	0	51
r563	5	2	9	0.111111	568
r563	5	1	8	0.25	818
r563	5	6	8	0.75	1050
r563	5	5	10	0.8	1059
r563	5	3	8	0.875	1065
r584	13	2	10	0	206
r584	13	3	9	0	207
r584	13	4	10	0	208
r584	13	6	8	0	209
r584	13	5	9	0.111111	590
r589	5	1	9	0	52
r589	5	3	11	0	53
r589	5	4	11	0	54
r589(2)	12	1	11	0	195
r589(2)	12	2	11	0	196
r589(2)	12	4	11	0	197
r589(2)	12	5	11	0	198
r589(2)	12	6	8	0	199
r589(2)	12	3	9	0.111111	587
r59	5	1	10	0	58
r59	5	5	11	0.181818	694
r59	5	2	10	0.2	727
r646	16	3	8	0.25	835
r703	33	2	8	0	440
r707	1	2	8	0.125	636
r707(2)	5	2	9	0	59
r707(2)	5	4	11	0	60
r707(2)	5	6	10	0	61
r707(2)	5	5	10	0.1	495
r707(2)	5	3	8	0.125	644
r712	3	6	9	0	35
r712	3	5	9	0.222222	767
r712	3	1	9	0.333333	895
r712	3	2	9	0.333333	896
r712	3	4	9	0.444444	958
r712	3	3	8	0.5	991
r712(2)	6	1	9	0	66
r712(2)	6	2	9	0.222222	772
r712(2)	6	5	8	0.375	924
r712(3)	9	1	9	0	96
r712(3)	9	3	10	0	97
r712(3)	9	4	10	0	98
r712(3)	9	6	8	0	99
r712(3)	9	2	10	0.2	732
r716	13	2	9	0	201
r716	13	5	10	0	202
r716	13	3	9	0.333333	904
r716	13	6	8	0.5	996
r721	7	3	8	0.125	647
r721	7	1	8	0.25	823
r721	7	4	8	0.75	1051
r721(2)	16	2	11	0	262
r721(2)	16	4	9	0	263
r721(2)	16	3	8	0.125	666
r721(2)	16	5	10	0.4	948
r721(3)	17	3	10	0	292
r721(3)	17	5	9	0.111111	608
r721(3)	17	2	8	0.25	839
r721(3)	17	1	11	0.272727	862
r732	3	1	8	0	18
r732	3	2	11	0	19
r732	3	6	9	0	20
r732	3	4	11	0.0909091	445
r732	3	5	10	0.1	482
r732	3	3	11	0.181818	692
r732(2)	6	2	10	0	64
r732(2)	6	5	8	0.25	819
r732(2)	6	1	10	0.3	871
r732(2)	6	4	8	0.5	992
r732(2)	6	6	10	0.7	1045
r737	16	3	8	0	267
r737	16	4	9	0	268
r737	16	1	9	0.444444	967
r737	16	6	10	0.9	1074
r738	13	1	8	0	216
r738	13	2	9	0.111111	592
r738	13	4	9	0.111111	593
r748	13	2	10	0	215
r748	13	3	8	0.125	661
r748	13	4	9	0.222222	788
r748	13	6	10	0.4	944
r75	13	2	8	0	205
r75	13	1	9	0.333333	905
r75(2)	26	1	8	0.125	680
r75(2)	26	4	10	0.2	756
r75(2)	26	5	10	0.2	757
r75(2)	26	2	8	0.25	850
r75(2)	26	6	8	0.375	936
r75(2)	26	3	8	0.75	1053
r765	3	2	11	0	21
r765	3	3	10	0	22
r765	3	4	11	0	23
r765	3	1	9	0.666667	1038
r765	3	6	8	0.75	1049
r774	3	6	10	0.1	483
r774	3	4	10	0.3	869
r774	3	2	8	0.375	921
r774	3	3	8	0.5	989
r774(2)	6	6	10	0.2	729
r774(2)	6	3	8	0.5	993
r776	15	1	9	0	253
r776	15	3	8	0	254
r776	15	4	11	0.0909091	459
r776	15	2	10	0.1	532
r776	15	5	10	0.2	748
r783	14	4	8	0.25	832
r783	14	3	8	0.375	927
r783(2)	21	8	9	0	361
r783(2)	21	7	9	0.222222	800
r783(2)	21	4	8	0.375	932
r783(2)	21	5	9	0.444444	973
r783(3)	27	6	9	0	412
r783(3)	27	2	9	0.222222	806
r783(3)	27	5	8	0.375	937
r783(3)	27	1	9	0.444444	979
r783(3)	27	3	9	0.555556	1018
r783(3)	27	4	9	0.666667	1044
r786	3	2	9	0	12
r786	3	3	8	0	13
r786	3	4	9	0	14
r786	3	6	9	0	15
r786	3	5	10	0.1	481
r786	3	1	11	0.454545	982
r786(2)	6	4	10	0.1	497
r786(2)	6	6	9	0.222222	771
r787	14	5	8	0	217
r787	14	6	11	0.0909091	457
r787	14	3	9	0.222222	789
r787	14	2	8	0.25	831
r787(2)	19	2	11	0.0909091	464
r787(2)	19	1	9	0.222222	796
r787(2)	19	3	9	0.222222	797
r790	14	1	8	0	226
r790	14	3	11	0.181818	704
r790	14	4	10	0.4	945
r790	14	6	10	0.4	946
r790	14	5	11	0.454545	984
r790(2)	21	6	9	0	360
r790(2)	21	4	11	0.181818	715
r790(2)	21	1	10	0.2	752
r790(2)	21	5	9	0.222222	799
r796	10	4	10	0	101
r796	10	5	8	0.125	653
r796	10	6	11	0.181818	697
r796	10	2	9	0.222222	779
r796	10	1	11	0.272727	860
r799	3	1	11	0	16
r799	3	6	9	0	17
r799	3	3	9	0.111111	559
r799	3	4	8	0.125	639
r799	3	2	8	0.25	812
r799(2)	6	3	8	0	67
r799(2)	6	4	10	0.1	498
r799(2)	6	6	9	0.111111	569
r799(2)	6	2	8	0.125	645
r799(2)	6	5	9	0.444444	961
r799(3)	18	2	10	0	328
r799(3)	18	3	10	0	329
r799(3)	18	5	11	0	330
r799(3)	18	6	10	0	331
r801	14	5	11	0	218
r801	14	2	9	0.111111	594
r801	14	4	11	0.181818	703
r801	14	6	9	0.222222	790
r801	14	3	9	0.333333	906
r801(2)	21	3	11	0	359
r801(2)	21	2	10	0.1	542
r801(2)	21	4	10	0.1	543
r801(2)	21	5	8	0.125	674
r801(2)	21	6	11	0.181818	714
r802	14	1	11	0	219
r802	14	3	10	0.3	874
r802(2)	19	2	10	0	334
r802(2)	19	3	11	0.0909091	465
r802(2)	19	1	8	0.25	841
r802(3)	34	2	9	0	441
r802(3)	34	3	11	0	442
r802(3)	34	4	10	0	443
r805	16	2	11	0	255
r805	16	6	10	0	256
r805	16	3	10	0.1	533
r805	16	4	8	0.125	665
r805	16	1	11	0.181818	708
r805	16	5	11	0.545455	1006
r808	4	1	8	0	36
r808	4	4	9	0	37
r808	4	6	8	0	38
r808	4	7	9	0	39
r808	4	5	8	0.125	640
r808	4	2	9	0.333333	897
r808(2)	11	2	10	0	126
r808(2)	11	3	9	0	127
r808(2)	11	4	10	0	128
r808(2)	11	6	9	0	129
r808(2)	11	5	10	0.1	510
r808(3)	14	4	8	0	228
r808(3)	14	5	8	0	229
r808(3)	14	6	10	0.1	529
r808(3)	14	3	9	0.111111	596
r808(4)	19	2	10	0	335
r808(4)	19	6	10	0	336
r808(4)	19	1	10	0.2	750
r810	14	3	11	0	220
r810	14	4	10	0	221
r810	14	5	9	0	222
r810	14	2	9	0.222222	791
r810	14	6	10	0.3	875
r819	14	5	10	0.2	741
r819	14	2	8	0.25	833
r819	14	1	9	0.333333	907
r819	14	6	8	0.375	928
r819(2)	19	4	11	0.0909091	466
r819(2)	19	3	11	0.181818	713
r819(2)	19	2	10	0.3	880
r820	2	4	10	0.1	477
r820	2	3	10	0.4	940
r820	2	1	10	0.5	986
r820	2	2	10	0.6	1020
r820	2	6	10	0.9	1072
r820(2)	9	2	8	0	100
r820(2)	9	3	10	0.1	506
r820(2)	9	4	9	0.111111	577
r821	14	5	10	0	227
r821	14	3	11	0.0909091	458
r821	14	4	10	0.1	528
r821	14	1	10	0.2	743
r821	14	2	10	0.3	876
r821	14	6	10	0.4	947
r821(2)	19	5	10	0.1	539
r821(2)	19	4	9	0.222222	798
r821(2)	19	2	10	0.9	1075
r822	4	1	10	0.1	488
r822	4	3	10	0.1	489
r822	4	6	10	0.1	490
r822	4	5	8	0.125	641
r822	4	2	10	0.2	724
r822	4	4	11	0.454545	983
r822(2)	14	3	9	0	224
r822(2)	14	6	11	0	225
r822(2)	14	2	10	0.1	527
r822(2)	14	1	9	0.111111	595
r822(2)	14	5	10	0.2	742
r822(2)	14	4	9	0.222222	792
r822(3)	17	1	10	0	287
r822(3)	17	3	8	0	288
r822(3)	17	4	8	0	289
r822(3)	17	5	13	0	290
r822(3)	17	6	8	0	291
r822(3)	17	2	11	0.181818	711
r837	14	3	8	0	233
r837	14	4	10	0	234
r837	14	1	8	0.25	834
r843	16	2	10	0	280
r843	16	4	9	0	281
r843	16	3	8	0.25	837
r843	16	1	8	0.5	1002
r843(2)	29	6	9	0	419
r843(2)	29	5	9	0.111111	632
r843(2)	29	2	8	0.25	855
r843(2)	29	1	8	0.375	939
r843(2)	29	4	9	0.555556	1019
r849	31	4	8	0	429
r849	31	5	11	0	430
r849	31	3	8	0.5	1005
r85	29	2	8	0	417
r85	29	4	9	0	418
r85	29	1	11	0.272727	866
r85	29	3	10	0.3	892
r85	29	5	8	0.5	1003
r85	29	6	8	0.875	1069
r850	16	1	8	0	279
r850	16	3	9	0.111111	606
r850	16	2	8	0.125	669
r850	16	5	9	0.444444	969
r850	16	4	11	0.454545	985
r850	16	6	10	0.5	1001
r852	3	1	10	0	24
r852	3	2	10	0.1	484
r852	3	4	9	0.111111	560
r852(2)	9	1	10	0	87
r852(2)	9	3	9	0	88
r852(2)	9	4	8	0	89
r852(2)	9	5	10	0.1	504
r852(2)	9	6	11	0.181818	696
r852(2)	9	2	11	0.272727	859
r853	21	4	9	0	367
r853	21	5	10	0	368
r853	21	6	10	0	369
r853	21	2	9	0.111111	623
r853	21	3	9	0.111111	624
r853	21	1	8	0.25	847
r853(2)	30	4	10	0	425
r853(2)	30	5	8	0	426
r853(2)	30	2	8	0.125	684
r855	16	3	9	0.444444	966
r855	16	2	10	0.5	1000
r855(2)	26	1	9	0	404
r855(2)	26	3	9	0	405
r855(2)	26	6	9	0	406
r855(2)	26	5	11	0.0909091	473
r855(2)	26	2	11	0.181818	716
r857	15	3	9	0	252
r857	15	2	9	0.333333	911
r857	15	4	10	0.5	999
r857	15	6	9	0.666667	1042
r857	15	1	9	0.777778	1057
r857(2)	23	5	8	0	383
r857(2)	23	6	11	0	384
r857(2)	23	4	10	0.2	755
r857(2)	23	3	9	0.222222	803
r857(2)	23	2	9	0.555556	1016
r859	16	1	11	0.181818	709
r859	16	6	11	0.181818	710
r859	16	3	9	0.222222	795
r859	16	5	10	0.3	878
r859	16	2	9	0.555556	1014
r859	16	4	8	0.875	1067
r861	17	1	9	0	318
r861	17	2	11	0	319
r861	17	3	8	0	320
r861	17	4	10	0.4	949
r861	17	5	9	0.555556	1015
r879	20	1	8	0	337
r879	20	4	9	0	338
r879	20	3	9	0.111111	617
r879	20	2	10	0.2	751
r879	20	5	8	0.25	842
r879	20	6	10	0.4	950
r879(2)	32	1	11	0	435
r882	20	1	11	0	353
r882	20	3	9	0.333333	915
r882	20	4	10	0.4	952
r882(2)	32	6	9	0	431
r882(2)	32	1	11	0.0909091	475
r882(2)	32	3	10	0.1	555
r882(2)	32	4	8	0.75	1055
r884	10	4	9	0	106
r884	10	5	11	0.0909091	449
r884	10	1	8	0.125	654
r884	10	3	10	0.4	942
r884	10	2	9	0.444444	962
r884(2)	17	1	10	0	293
r884(2)	17	2	9	0	294
r884(2)	17	5	9	0	295
r884(2)	17	6	8	0	296
r884(2)	17	4	10	0.1	538
r884(2)	17	3	10	0.3	879
r884(3)	22	3	10	0.3	884
r884(3)	22	5	8	0.375	934
r884(3)	22	4	9	0.444444	975
r884(3)	22	6	8	0.625	1035
r884(3)	22	2	10	0.7	1047
r884(3)	22	1	10	0.9	1076
r897	15	5	9	0	251
r897	15	1	9	0.111111	602
r897	15	2	9	0.111111	603
r897	15	4	9	0.333333	910
r897	15	3	10	0.6	1026
r900	4	1	11	0	42
r900	4	2	8	0	43
r900(2)	8	2	10	0	80
r900(2)	8	1	10	0.1	501
r900(2)	8	4	10	0.1	502
r900(2)	8	3	9	0.111111	573
r900(2)	8	5	8	0.125	652
r900(3)	17	1	8	0	305
r900(3)	17	3	8	0	306
r900(3)	17	4	9	0	307
r900(3)	17	5	10	0	308
r900(3)	17	2	8	0.125	671
r900(3)	17	6	9	0.444444	970
r907	15	1	8	0	248
r907	15	2	10	0	249
r907	15	6	9	0	250
r907	15	3	10	0.1	531
r907	15	4	8	0.125	664
r907	15	5	10	0.2	747
r908	15	1	8	0	236
r908	15	4	8	0	237
r908	15	5	8	0	238
r908	15	6	11	0.181818	706
r908	15	3	8	0.5	998
r91	15	1	11	0	241
r91	15	2	8	0	242
r91	15	5	8	0	243
r91	15	6	9	0	244
r91	15	4	8	0.125	662
r91	15	3	11	0.181818	707
r91(2)	24	3	8	0	390
r91(2)	24	4	8	0	391
r91(2)	24	5	8	0	392
r91(2)	24	1	11	0.0909091	472
r91(2)	24	2	9	0.111111	629
r911	16	1	8	0	264
r911	16	3	9	0	265
r911	16	4	10	0	266
r911	16	6	8	0.125	667
r911	16	5	10	0.2	749
r913	15	2	10	0.1	530
r913	15	4	9	0.111111	599
r913	15	5	9	0.111111	600
r913	15	1	10	0.2	745
r913	15	3	9	0.333333	909
r913	15	6	9	0.666667	1041
r93	15	3	10	0	235
r93	15	5	11	0.181818	705
r93	15	6	8	0.375	929
r93	15	1	9	0.666667	1040
w114	1	1	8	0	1
w114	1	3	9	0	2
w114	1	5	9	0	3
w114	1	6	8	0	4
w114	1	2	8	0.125	635
w114	1	4	9	0.222222	762
w114(2)	12	2	10	0	160
w114(2)	12	3	10	0	161
w114(2)	12	5	9	0	162
w114(2)	12	6	9	0	163
w114(2)	12	1	9	0.111111	585
w23	32	3	9	0	432
w23	32	1	11	0.0909091	476
w23	32	4	8	0.25	856
w26	2	1	10	0	10
w26	2	5	9	0	11
w26	2	2	9	0.222222	765
w26(2)	8	2	11	0	72
w26(2)	8	4	11	0	73
w26(2)	8	6	9	0	74
w26(2)	8	3	8	0.125	650
w26(2)	8	5	8	0.125	651
w26(2)	8	1	9	0.222222	775
w33	22	5	10	0	375
w33	22	6	8	0	376
w33	22	3	11	0.0909091	470
w33	22	1	9	0.111111	627
w33	22	2	10	0.2	754
w33(2)	28	1	10	0	415
w33(2)	28	2	9	0	416
w33(2)	28	5	10	0.1	553
w33(2)	28	3	8	0.125	682
w33(2)	28	4	10	0.3	891
w33(2)	28	6	10	0.8	1061
w33(3)	30	4	9	0.222222	809
w34	30	4	10	0	424
w34	30	6	10	0.2	761
w34	30	3	9	0.222222	810
w35	30	4	9	0.111111	634
w35	30	1	8	0.125	683
w36	21	5	11	0	362
w36	21	2	11	0.0909091	469
w36	21	6	9	0.111111	621
w36	21	4	10	0.2	753
w36	21	3	8	0.875	1068
w37	4	5	9	0	40
w37	4	7	10	0	41
w37	4	6	11	0.0909091	446
w37	4	3	10	0.2	723
w37	4	1	8	0.25	815
w376	22	2	10	0.1	545
w376	22	6	8	0.25	848
w376	22	1	9	0.333333	918
w376	22	3	8	0.375	935
w376	22	4	9	0.444444	976
w376	22	5	11	0.545455	1007
w38	21	4	11	0	363
w38	21	3	9	0.111111	622
w38	21	1	8	0.25	845
w38	21	6	8	0.25	846
w38	21	5	10	0.3	882
w38	21	2	9	0.444444	974
w40	21	4	11	0	357
w40	21	2	9	0.111111	620
w40	21	3	8	0.125	673
w40	21	1	9	0.333333	916
w40	21	6	8	0.375	931
w43	22	1	8	0	373
w43	22	2	9	0.111111	626
w43	22	6	9	0.222222	801
w43	22	4	9	0.333333	917
w47	4	5	9	0.111111	565
w47	4	1	9	0.333333	898
w47	4	2	8	0.625	1029
w47(2)	7	5	8	0.375	925
w52	32	1	8	0	436
w52	32	2	10	0	437
w52	32	4	10	0	438
w52	32	6	11	0	439
w52	32	5	8	0.125	689
w54	2	3	10	0.1	480
w54	2	1	10	0.3	868
w54	2	2	10	0.5	988
w54(2)	8	2	9	0	70
w54(2)	8	6	9	0	71
w54(2)	8	4	9	0.222222	774
w54(2)	8	3	11	0.272727	858
w55	21	4	8	0	364
w55	21	5	9	0	365
w55	21	6	11	0	366
w55	21	3	8	0.375	933
w55	21	2	10	0.4	953
w55	21	1	9	0.666667	1043
w60	2	5	9	0.111111	558
w60	2	1	11	0.454545	981
w60(2)	11	1	8	0	130
w60(2)	11	3	10	0	131
w60(2)	11	4	8	0.25	827
w60(2)	11	6	8	0.375	926
w62	22	4	11	0	370
w62	22	2	10	0.3	883
w63	1	2	11	0.0909091	444
w63(2)	7	2	8	0	68
w67	1	1	8	0.125	637
w67	1	2	10	0.3	867
w68	4	1	10	0.1	487
w68	4	5	13	0.153846	690
w68	4	2	10	0.2	722
w68	4	3	9	0.222222	768
w68	4	6	9	0.222222	769
w70	21	3	9	0	358
w70	21	5	11	0.0909091	468
w70	21	2	10	0.1	541
w70	21	1	8	0.25	844
w70(2)	30	2	8	0	422
w70(2)	30	1	10	0.1	554
w74	2	4	10	0.1	478
w74	2	5	10	0.1	479
w74	2	2	8	0.125	638
w74(2)	9	2	9	0	94
w74(2)	9	4	10	0	95
w74(2)	9	5	11	0.0909091	448
w74(2)	9	6	10	0.1	505
w74(2)	9	3	9	0.222222	778
w79	4	4	9	0	45
w79	4	7	9	0	46
w79	4	1	9	0.111111	566
w79	4	5	10	0.2	725
w79	4	6	8	0.375	923
w79(2)	7	3	10	0.1	499
w79(2)	7	4	10	0.1	500
w79(2)	7	2	8	0.25	824
w80	2	1	8	0.875	1062
w82	1	4	11	0.181818	691
w82	1	5	10	0.2	720
w82	1	2	9	0.222222	763
w82	1	3	9	0.222222	764
w82	1	1	8	0.375	920
w82(2)	4	5	9	0.111111	563
w82(2)	4	7	9	0.111111	564
w82(2)	4	4	9	0.444444	959
w82(2)	4	6	9	0.555556	1009
w82(3)	6	2	8	0	65
w82(3)	6	5	8	0.25	820
w82(3)	6	1	9	0.555556	1011
w82(3)	6	6	9	0.555556	1012
w86(2)	11	6	9	0	145
w86(2)	11	1	11	0.0909091	453
w86(2)	11	3	10	0.2	735
w86(2)	11	4	10	0.2	736
w86(2)	11	2	8	0.75	1052
w87	2	1	12	0.25	811
w87	2	4	9	0.333333	893
w87(2)	8	1	9	0	76
w87(2)	8	3	9	0	77
w87(2)	8	4	9	0	78
w87(2)	8	6	10	0	79
w87(2)	8	5	10	0.6	1022
w87(2)	8	2	8	0.625	1033

## Sheet: Average Rank
Line	Avg_Rank
r21	7.5
r476	146
r589	157.5
r335	181.667
r373	188.4
r149	223.5
r136	230.4
r280	236.75
w114	240.517
w63	256
r584	284
r502	287.5
r195	294.2
r315	299.978
r356	300.5
r486	304.833
r228	305.25
r378	314.6
w26	322.75
r900	327.533
r808	338.75
r189	345.5
r313	348
r239	357.233
r325	363
r396	365.167
r852	371.833
r379	373.8
r381	391.483
r145	400
r437	401.333
r309	404.85
r409	406
r227	406.583
w37	413.4
r392	415.167
r176	418
r357	421.8
r91	422.317
r799	429.1
r169	430.5
r765	432.2
r208	432.667
r177	434.25
r837	434.333
r703	440
r911	442.2
r786	444.25
r907	448.167
r776	449.2
r707	449.9
r386	451.333
w74	458.033
r158	461.333
r38	463.833
r365	464.083
r810	466.8
r738	467
r443	469.833
r908	483.8
r101	485.583
w52	487.8
r301	491.333
r59	493
r391	494
r129	498
r367	501.917
r822	504.556
r382	506.667
r802	512.444
r387	513.6
r732	520.067
w70	520.625
r853	522.5
r28	524
r712	524.578
r181	527
r383	527.75
r350	530
w79	535.067
r879	537.583
r398	544
r310	547.6
r361	550.5
r508	555.75
r399	560.8
r153	563
r338	568.333
r805	571.167
r427	571.5
r716	577.75
r426	584.45
r440	584.6
r861	585.8
w23	588.667
r237	591
r304	599.5
r535	602.75
r801	604.9
w54	612.75
r491	614.333
r360	617.7
r796	619
r849	622.667
w86	625
w87	625.25
r256	625.417
w62	628
r359	630.167
r787	630.75
r217	631.8
w60	638.25
r223	643.2
r737	646
r820	648.267
r748	653.5
w36	655.4
w35	658.5
w34	665.667
r554	665.833
w33	667.411
r272	669.4
r374	670
w55	672.667
r721	676.528
r897	680
w43	680.75
r884	684.289
r882	686.333
w68	688
r843	688.15
r362	696.8
r75	698.667
w40	701
r142	706.6
r790	710.2
r821	718.5
r93	729.25
r855	733.9
r913	738.667
r235	740.25
r375	746.25
r850	753.5
w67	753.5
w38	757.167
r352	759
w82	759.483
r857	762.4
r380	770.722
r563	770.833
r819	771.042
r85	779.833
r109	785
r371	792.5
r441	821.833
r287	831.5
r370	832.5
r646	837
r783	840.167
r774	840.625
r340	842.5
r859	864.333
w376	874.5
r517	877.292
w47	881.167
w80	1066
