# Supplementary material
Source: publisher figshare collection journal article supplement (https://gsajournals.figshare.com/articles/dataset/_/11317307)
Supplement: Supplementary file 1 [file 1 › TableS8_DGRP2Top100.xlsx]

## Sheet: TOP100
ID	MinorAllele	MajorAllele	MAF	MinorAlleleCount	MajorAlleleCount	SinglePval	SingleMixedPval	Nearest gene within 10kb region
X_21373247_SNP	T	C	0.05556	7	119	4.551e-07	3.85042e-07	CR45082
3R_21980124_SNP	G	A	0.2768	31	81	8.524e-07	4.37552e-07	No gene
X_21373572_SNP	T	C	0.07031	9	119	7.119e-07	5.52733e-07	CR45082
X_21373578_SNP	A	C	0.07031	9	119	7.119e-07	5.52733e-07	CR45082
3R_18903893_SNP	C	T	0.4322	51	67	9.803e-07	8.71397e-07	Cow
3R_18903892_SNP	A	T	0.4211	48	66	2.228e-06	1.81662e-06	Cow
2L_19316857_SNP	C	A	0.05	6	114	3.507e-06	1.89539e-06	No gene
2L_19316859_INS	TGTA	T	0.05785	7	114	3.752e-06	2.09526e-06	No gene
2L_6262204_INS	TGCGAGTACT	T	0.072	9	116	2.573e-06	2.09706e-06	Ddr
2L_21290182_SNP	C	G	0.05983	7	110	5.29e-06	2.09719e-06	Mondo
2L_19316854_INS	AACC	A	0.05	6	114	3.434e-06	2.46924e-06	No gene
3L_14143779_DEL	C	CCCTAACATTTC	0.1429	17	102	1.705e-06	2.56083e-06	No gene
3L_8019127_SNP	G	A	0.1074	13	108	3.868e-06	2.82086e-06	nmo
3L_3307167_INS	TGCA	G	0.06349	8	118	2.957e-06	3.00819e-06	ZnT63C
3L_10336246_INS	AA	A	0.05882	7	112	3.657e-06	4.82286e-06	CR46006
3L_18127530_SNP	A	G	0.1636	18	92	1.158e-05	5.69623e-06	in 5' region of Cyp312a1 and 3' region of CR44669
3R_13324673_SNP	T	G	0.0625	7	105	6.856e-06	5.98057e-06	Dscam3
2R_19225235_DEL	C	CATTCCATTCC	0.1376	15	94	9.774e-06	6.76011e-06	No gene
X_15992071_SNP	C	T	0.07087	9	118	1.07e-05	8.13474e-06	CG42354 and CG42353
3L_4921078_SNP	T	G	0.144	18	107	1.102e-05	9.13649e-06	in 3' region of Rh50
2L_6243294_SNP	T	C	0.06349	8	118	1.521e-05	1.13098e-05	No gene
X_12567600_INS	CA	C	0.287	33	82	1.902e-05	1.17941e-05	hwt
3L_4921049_SNP	G	A	0.1349	17	109	1.432e-05	1.18589e-05	in 3' region of Rh50
2L_6262221_DEL	A	AAGA	0.08197	10	112	1.792e-05	1.2011e-05	Ddr
3L_4921053_SNP	T	G	0.1417	18	109	1.419e-05	1.25476e-05	in 3' region of Rh50
3R_12318228_SNP	A	G	0.2167	26	94	1.534e-05	1.26123e-05	Cad89D
3R_25355545_SNP	A	G	0.1032	13	113	1.379e-05	1.32021e-05	5' region of CR43613
3L_8221279_SNP	C	G	0.08	10	115	1.859e-05	1.42031e-05	in 5' region of eIF4E3
X_17649463_SNP	A	G	0.2302	29	97	1.436e-05	1.45017e-05	in 3' region of CG42684
3L_4921119_SNP	T	A	0.144	18	107	1.397e-05	1.46311e-05	in 3' region of Rh50
2R_12984114_SNP	C	T	0.07874	10	117	1.823e-05	1.48721e-05	GstS1
3L_4921074_SNP	A	C	0.136	17	108	1.95e-05	1.54194e-05	in 3' region of Rh50
3L_4921055_SNP	G	T	0.1349	17	109	1.892e-05	1.61379e-05	in 3' region of Rh50
3R_14827197_SNP	T	A	0.1613	20	104	2.198e-05	1.71427e-05	gukh
2L_13114352_SNP	C	T	0.3596	41	73	3.545e-05	1.77939e-05	No gene
3L_2312640_SNP	C	G	0.12	15	110	2.739e-05	1.87364e-05	No gene
3R_25144666_SNP	T	G	0.08197	10	112	2.948e-05	1.89977e-05	Cnx99A
3L_4920965_SNP	G	A	0.144	18	107	1.934e-05	1.92338e-05	in 3' region of Rh50
3R_19765257_SNP	T	A	0.3559	42	76	2.428e-05	1.93347e-05	Gdh
3L_4920994_DEL	A	AGTGATTTTA	0.1311	16	106	2.632e-05	1.94627e-05	in 3' region of Rh50
X_2883348_DEL	C	CT	0.144	18	107	2.845e-05	1.96922e-05	kirre
X_21373559_SNP	T	C	0.2063	26	100	2.317e-05	2.09535e-05	CR45082
3R_25853866_SNP	T	G	0.056	7	118	3.083e-05	2.12642e-05	Axn
3L_1436996_SNP	T	C	0.09375	12	116	2.565e-05	2.13204e-05	Ptp61F/SA-2
3L_5637241_SNP	A	C	0.4472	55	68	3.447e-05	2.14222e-05	Blimp-1
2L_6262233_SNP	A	G	0.06504	8	115	1.979e-05	2.15904e-05	Ddr
3R_13460499_SNP	T	G	0.07258	9	115	1.943e-05	2.20414e-05	CG43175
2R_1151707_SNP	T	C	0.06604	7	99	3.779e-05	2.37412e-05	d4
2L_1620718_SNP	T	C	0.2397	29	92	2.803e-05	2.46782e-05	CR44603
2R_14662713_SNP	T	G	0.1148	14	108	3.71e-05	2.47114e-05	in 5' region of CR43964
X_19618183_SNP	A	T	0.296	37	88	2.565e-05	2.48554e-05	CG12531
2R_6148794_SNP	C	T	0.1429	17	102	4.221e-05	2.48987e-05	CG12911
X_12588122_SNP	T	G	0.09677	12	112	2.189e-05	2.53757e-05	Smr
X_21371216_SNP	A	G	0.05512	7	120	3.098e-05	2.56876e-05	CR45082
3L_4763665_SNP	C	G	0.096	12	113	1.87e-05	2.58808e-05	RhoGEF64C
2R_18292123_SNP	T	G	0.2667	32	88	2.686e-05	2.63588e-05	CG6044
X_12567604_DEL	A	AT	0.2783	32	83	3.712e-05	2.69182e-05	Tis11
X_12567609_INS	ATA	A	0.2783	32	83	3.712e-05	2.69182e-05	Tis11
2R_17402320_SNP	T	A	0.1789	22	101	3.65e-05	2.69968e-05	MESK2
3R_21231807_SNP	T	C	0.1864	22	96	2.639e-05	2.70396e-05	Fur1
3L_18127513_SNP	T	A	0.1842	21	93	4.524e-05	2.74595e-05	in 5' region of Cyp312a1 and 3' region of CR44669
3R_25669139_SNP	A	G	0.1301	16	107	3.336e-05	2.7476e-05	Cad99C
3R_15822838_SNP	G	T	0.1475	18	104	3.508e-05	2.75509e-05	Hs6st
2L_21403810_SNP	A	G	0.05085	6	112	4.753e-05	2.82128e-05	in 5' region of His-Psi:CR31616
2L_21290439_SNP	G	A	0.08264	10	111	3.408e-05	2.88515e-05	mondo
X_2883351_SNP	A	C	0.1371	17	107	4.374e-05	3.01506e-05	kirre
3L_6383876_SNP	A	T	0.05556	7	119	3.702e-05	3.0222e-05	No gene
2L_20506255_SNP	G	A	0.3036	34	78	5.187e-05	3.03429e-05	No gene
2L_21329922_SNP	A	T	0.1754	20	94	6.019e-05	3.06087e-05	in 5' region of dimm and 3' region of CR42696
3R_16366723_SNP	C	G	0.1639	20	102	5.219e-05	3.10636e-05	Stat92E
2R_11841107_SNP	G	A	0.4754	58	64	4.803e-05	3.17133e-05	Strn-Mlck
2L_6260580_SNP	G	C	0.06299	8	119	4.085e-05	3.18605e-05	Ddr
2R_19689825_INS	GGAAGGTCTGAAGGCTGAAGG	G	0.05785	7	114	5.418e-05	3.26348e-05	CG30177
3R_16366975_SNP	G	C	0.224	28	97	4.567e-05	3.28811e-05	Stat92E
2L_13114381_INS	T	TT	0.3942	41	63	7.142e-05	3.32257e-05	in 3' region of CG5142 and CR44198 and 5' region of CG43050
X_12567741_DEL	A	AAGTTCAA	0.2541	31	91	4.462e-05	3.35099e-05	Tis11
3L_6383816_SNP	G	T	0.056	7	118	4.712e-05	3.35664e-05	No gene
3L_18127555_DEL	T	TG	0.1518	17	95	4.99e-05	3.36028e-05	in 5' region of Cyp312a1 and 3' region of CR44669
X_12567782_SNP	G	C	0.272	34	91	4.553e-05	3.38224e-05	Tis11
3L_6383897_DEL	T	TT	0.05512	7	120	4.424e-05	3.45989e-05	No gene
2R_9254287_SNP	T	A	0.4098	50	72	4.21e-05	3.51151e-05	No gene
X_8810260_SNP	A	T	0.4882	62	65	4.5e-05	3.52638e-05	rdgA
3R_17742888_SNP	C	T	0.1754	20	94	4.579e-05	3.55719e-05	in 3' region of CG17843
3R_27016444_SNP	G	A	0.4034	48	71	4.558e-05	3.55779e-05	mesh
2R_11841073_SNP	C	A	0.438	53	68	4.731e-05	3.62958e-05	Strn-Mlck
2R_17854060_DEL	T	TGAATCATAAATATGCCATCCACCCACTAATTAACA	0.112	14	111	5.008e-05	3.64581e-05	ppk9
X_13697948_SNP	C	A	0.07812	10	118	4.37e-05	3.66906e-05	inaE
X_13697960_SNP	T	C	0.07812	10	118	4.37e-05	3.66906e-05	inaE
3L_18127562_SNP	T	C	0.1404	16	98	4.716e-05	3.69684e-05	in 5' region of Cyp312a1 and 3' region of CR44669
2L_21293675_SNP	T	G	0.08475	10	108	4.592e-05	3.70686e-05	mondo
X_5990490_SNP	G	A	0.07258	9	115	4.109e-05	3.77171e-05	Nep1
2L_21331774_SNP	T	C	0.1167	14	106	5.92e-05	3.79169e-05	dimm
3L_18127561_SNP	G	A	0.1478	17	98	4.577e-05	3.82413e-05	in 5' region of Cyp312a1 and 3' region of CR44669
3L_6610334_SNP	T	G	0.2167	26	94	5.204e-05	3.82626e-05	CG8398
3L_994270_SNP	G	C	0.07812	10	118	4.601e-05	3.86683e-05	CG12038
2R_11176309_SNP	G	C	0.0873	11	115	5.13e-05	3.98849e-05	Trpm
3L_18127544_SNP	C	T	0.1441	16	95	4.59e-05	3.99714e-05	in 5' region of Cyp312a1 and 3' region of CR44669
3L_4921056_SNP	G	A	0.1371	17	107	3.939e-05	4.00482e-05	in 3' region of Rh50
2L_7313250_SNP	G	A	0.2846	35	88	4.313e-05	4.00604e-05	wg
2L_21329003_SNP	G	C	0.1429	17	102	6.175e-05	4.04445e-05	in 5' region of dimm and 3' region of CR42696
