# Supplementary material
Source: publisher figshare collection journal article supplement (https://gsajournals.figshare.com/articles/dataset/_/11317307)
Supplement: Supplementary file 1 [file 2]

## Sheet: README
Abbreviations:
Vber	Virgin Berlin female
VFG	Virgin female with a germline (tud/+)
VFN	Virgin female without a germline (tud/+)
1MG	Berlin female mated to a male with a germline (tud/+) (1 day post-mating)
1MN	Berlin female mated to a male without a germline (tud/+) (1 day post-mating)
1FG	Female with a germline (tud/+) mated to Berlin male (1 day post-mating)
1FN	Female without a germline (tud/+) mated to a Berlin male (1 day post-mating)
3MG	Berlin female mated to a male with a germline (tud/+) (3 days post-mating)
3MN	Berlin female mated to a male without a germline (tud/+) (3 days post-mating)
3FG	Female with a germline (tud/+) mated to Berlin male (3 days post-mating)
3FN	Female without a germline (tud/+) mated to a Berlin male (3 days post-mating)
Differentially expressed genes with a FDR cut-off <0.05 shown in the following tabs. Tabs indicate the comparison (see legend above)
Gene	Flybase Gene ID
Symbol	Gene Symbol
Mean FPKM	Average normalized reads for specified condition
FDR p-value	FDR corrected p-value for specified condition
Fold change	Fold change based on average normalized reads

## Sheet: VFG_VFN
Gene	Symbol	Mean FPKM VFN	Mean FPKM VFG	FDR P-value	Fold Change
FBgn0038484	CG5246	7.10967	0.206783	7.8791e-12	34.3823
FBgn0039299	CG11854	2.06535	0.0945907	0.0258224	21.8346		Higher in VFN
FBgn0039298	to	128.334	28.3792	1.23031e-34	4.52212		Higher in VFG
FBgn0044050	Ilp3	58.5023	12.9945	4.49287e-30	4.50208
FBgn0015035	Cyp4e3	58.2559	15.0772	2.31641e-37	3.86383
FBgn0002565	Lsp2	4240.68	1241.4	1.60006e-33	3.41604
FBgn0036995	CG5195	4.41225	1.29682	3.37372e-10	3.40237
FBgn0044048	Ilp5	69.4715	22.3076	2.80308e-16	3.11425
FBgn0038914	fit	2343.48	972.906	3.63317e-23	2.40875
FBgn0035282	CG13936	12.0958	5.31327	5.72718e-06	2.27653
FBgn0040732	CG16926	267.181	127.786	1.68984e-15	2.09085
FBgn0034438	CG9416	12.6075	6.08258	3.34174e-08	2.07272
FBgn0029898	CG14439	33.0118	17.176	7.8791e-12	1.92198
FBgn0052425	CG32425	158.889	82.7427	5.02245e-12	1.92028
FBgn0052282	Drsl4	75.6389	41.3912	1.80628e-05	1.82741
FBgn0039801	Npc2h	139.329	76.2818	1.98332e-09	1.82651
FBgn0041711	yellow-e	8.02321	4.41321	0.00573086	1.818
FBgn0036046	Ilp2	133.529	74.1765	2.74899e-10	1.80015
FBgn0040364	CG11378	22.5572	12.6409	0.00160726	1.78447
FBgn0051704	CG31704	33.8844	19.2761	0.0472831	1.75785
FBgn0026593	CG5707	64.4827	37.0291	5.558e-08	1.74141
FBgn0034480	CG16898	20.4122	11.7764	0.000114553	1.73331
FBgn0036659	CG9701	7.51591	4.34098	0.0138815	1.73138
FBgn0041607	asparagine-synthetase	60.2946	36.0168	3.26451e-08	1.67407
FBgn0034117	CG7997	58.1442	34.8663	5.79449e-08	1.66763
FBgn0030558	CG1461	141.082	84.9854	2.74899e-10	1.66008
FBgn0034500	CG11200	27.6892	16.7717	0.000152237	1.65095
FBgn0263336	CR43417	22.5385	13.6699	0.00893775	1.64877
FBgn0038147	CCHa2	202.931	123.916	7.02866e-09	1.63765
FBgn0031801	CG9498	34.9973	21.385	3.08247e-05	1.63653
FBgn0031694	Cyp4ac2	31.2414	19.1836	9.45454e-06	1.62855
FBgn0034479	CG8654	46.2856	28.6962	5.79786e-08	1.61295
FBgn0034356	CG10924	23.8104	14.771	0.000324977	1.61197
FBgn0261575	tobi	615.698	388.734	9.19815e-05	1.58386
FBgn0024250	brk	9.34818	5.99325	0.00906541	1.55979
FBgn0032167	CG5853	28.8962	18.8165	9.22454e-05	1.53569
FBgn0086676	spin	68.0316	44.6991	1.12064e-07	1.52199
FBgn0033101	CG9436	38.0291	25.2324	0.000200262	1.50715
FBgn0001332	L	17.9146	11.9202	0.00125531	1.50288
FBgn0003067	Pepck	860.356	575.472	4.99758e-08	1.49504
FBgn0036549	CG10516	34.7141	23.5447	0.0188849	1.47439
FBgn0037819	CG14688	90.4166	61.5648	7.47229e-05	1.46864
FBgn0034387	Cyp12b2	33.3612	23.1124	0.00675166	1.44344
FBgn0038407	CG6126	46.9835	32.6145	7.94548e-05	1.44057
FBgn0035791	CG8539	56.4887	39.2211	0.000647745	1.44026
FBgn0039152	Rootletin	16.5792	11.5682	0.000113515	1.43317
FBgn0019643	Dat	47.5427	33.1756	0.000227277	1.43306
FBgn0015569	alpha-Est10	23.5371	16.5133	0.00209243	1.42534
FBgn0030218	CG1628	24.3608	17.2081	0.0316413	1.41566
FBgn0259682	Jabba	204.465	144.84	0.00203113	1.41166
FBgn0043791	CG8147	30.1392	21.4292	0.0424649	1.40646
FBgn0053120	CG33120	48.439	34.5736	0.000221019	1.40104
FBgn0046114	Gclm	87.3829	62.5944	0.0004533	1.39602
FBgn0032405	CG14946	11.4367	8.31489	0.0497194	1.37545
FBgn0039114	Lsd-1	166.595	122.252	0.00102018	1.36271
FBgn0014000	Hf	96.7551	72.0243	0.0181437	1.34337
FBgn0025595	AkhR	50.0239	37.5006	0.00945598	1.33395
FBgn0000459	disco	19.4565	14.6256	0.0232117	1.3303
FBgn0025814	Mgstl	222.736	167.783	0.00742951	1.32753
FBgn0037913	fabp	999.827	755.099	0.0013436	1.3241
FBgn0029765	CG16756	128.885	97.4922	0.00355288	1.322
FBgn0039800	Npc2g	356.437	270.691	0.00125531	1.31677
FBgn0032285	CG17108	1377.89	1056.02	0.00171779	1.30479
FBgn0004047	Yp3	26673.4	20502.8	0.0106601	1.30096
FBgn0025574	Pli	30.6407	23.5881	0.0316413	1.29899
FBgn0005626	ple	27.9462	21.5592	0.0214445	1.29625
FBgn0015576	alpha-Est8	69.7266	53.9679	0.0116468	1.292
FBgn0031305	Iris	151.066	117.25	0.0155522	1.28841
FBgn0051465	CG31465	4.34893	3.38015	1.92159e-05	1.28661
FBgn0085769	CR40728	3105.13	2419.51	0.00110327	1.28337
FBgn0004396	CrebA	29.0552	22.8262	0.0231072	1.27289
FBgn0085777	CR40959	1827.26	1441.88	0.00324279	1.26728
FBgn0085757	CR40621	4992.34	3945.63	0.00399252	1.26528
FBgn0085817	CR41607	1748.37	1382.43	0.00671278	1.26471
FBgn0085774	CR40779	6024.55	4766.77	0.00374921	1.26386
FBgn0085828	CR42195	1890.13	1497.98	0.0100062	1.26179
FBgn0040309	Jafrac1	307.716	243.97	0.00530334	1.26129
FBgn0085815	CR41605	1894.5	1508.97	0.0125862	1.25549
FBgn0085807	CR41590	3128.8	2501.61	0.009117	1.25072
FBgn0031645	CG3036	120.229	96.9526	0.0106601	1.24008
FBgn0085823	CR41617	5450.47	4423.54	0.0119765	1.23215
FBgn0085768	CR40712	5795.55	4742.89	0.0206809	1.22195
FBgn0037912	sea	47.3352	45.6121	0.0278216	1.03778
FBgn0020439	fau	127.66	167.988	0.0474321	0.759939
FBgn0038181	CG9297	68.2638	93.5169	0.0253744	0.729962
FBgn0000053	ade3	25.828	35.456	0.000383722	0.728453
FBgn0027579	CG5508	32.8103	45.2875	0.0110796	0.724489
FBgn0004028	wupA	99.6481	139.47	0.0448624	0.714477
FBgn0034761	CG4250	152.476	214.445	0.00741555	0.711028
FBgn0040653	IM4	1485.17	2092.31	0.0285064	0.709824
FBgn0042201	Nplp3	782.318	1103.65	0.00214614	0.708848
FBgn0040735	CG16836	263.469	374.429	0.00796933	0.703656
FBgn0033543	CG12338	43.7427	62.2092	0.0373874	0.703155
FBgn0001125	Got2	124.066	176.623	0.0390152	0.70243
FBgn0053307	CG33307	44.7935	65.0498	0.0285064	0.688603
FBgn0044047	Ilp6	22.1735	32.2361	0.0087138	0.687847
FBgn0005666	bt	22.6747	33.3665	0.0176263	0.679566
FBgn0004169	up	129.06	190.047	0.000349569	0.679096
FBgn0038211	CG9649	22.9607	33.8588	0.0106813	0.678133
FBgn0036449	bmm	21.8586	32.2807	0.0214445	0.677141
FBgn0033250	CG14762	73.3534	108.617	5.54519e-05	0.675338
FBgn0002528	LanB2	6.90795	10.2592	0.00265931	0.673343
FBgn0000046	Act87E	25.2388	37.7301	0.00463244	0.668929
FBgn0038467	CG3590	12.7458	19.0566	0.0450927	0.668839
FBgn0029766	CG15784	35.9243	54.4686	0.00034031	0.659542
FBgn0032773	fon	94.4647	143.817	8.34417e-05	0.656838
FBgn0020385	pug	59.4329	90.6418	0.000848405	0.655689
FBgn0264695	Mhc	139.493	213.623	0.00110327	0.652987
FBgn0027348	bgm	57.9469	88.7946	8.09233e-05	0.652594
FBgn0013984	InR	6.07815	9.32735	0.000231896	0.651648
FBgn0011722	Tig	23.3624	35.8853	4.06776e-06	0.651031
FBgn0002773	Mlc2	144.507	222.814	1.54319e-05	0.648554
FBgn0037935	CG6834	11.8252	18.2516	0.00496494	0.647899
FBgn0000044	Act57B	295.79	457.845	1.2709e-06	0.64605
FBgn0038820	CG4000	100.133	155.882	8.18733e-05	0.642363
FBgn0053138	AGBE	28.6345	44.6091	9.27872e-05	0.641899
FBgn0038172	Adgf-D	19.7672	30.9905	0.00535419	0.637847
FBgn0039238	CG7016	14.171	22.9606	0.0100062	0.617189
FBgn0034618	CG9485	14.2787	23.1941	9.50258e-08	0.615617
FBgn0040736	IM3	451.459	738.971	4.5239e-05	0.610929
FBgn0250824	CG33655	18.6728	31.2634	2.54247e-06	0.597272
FBgn0036619	Cpr72Ec	72.8602	122.573	9.57833e-08	0.594424
FBgn0023540	CG3630	10.1536	17.2099	0.0112254	0.589985
FBgn0052647	CG32647	42.5847	72.3095	4.55072e-05	0.588923
FBgn0001142	Gs1	50.3489	85.8218	6.46362e-07	0.586667
FBgn0031942	CG7203	34.4859	58.7963	0.000221019	0.586532
FBgn0040349	CG3699	52.2121	89.2537	0.000325838	0.584985
FBgn0034140	CG8317	37.1941	63.866	5.32699e-05	0.582377
FBgn0260746	Ect3	14.1973	24.4218	1.22294e-05	0.581336
FBgn0039094	CG10184	7.55815	13.6311	0.0114022	0.554479
FBgn0085282	CG34253	12.8223	23.2436	0.0135214	0.551651
FBgn0035348	CG16758	114.591	208.13	2.15483e-05	0.550576
FBgn0026403	Ndg	5.77879	10.5007	0.000129169	0.550323
FBgn0035189	CG9119	20.4344	37.652	9.1804e-05	0.542718
FBgn0025583	IM2	345.292	646.598	3.96249e-06	0.534013
FBgn0034276	CG6385	7.89932	15.8915	5.42942e-08	0.497077
FBgn0025454	Cyp6g1	28.8822	59.315	1.96964e-09	0.486929
FBgn0028540	CG9008	7.07655	15.2096	5.43315e-06	0.465269
FBgn0036876	CG9451	17.6497	38.3754	9.57833e-08	0.459921
FBgn0037635	CG9837	11.2324	24.6655	0.0214445	0.45539
FBgn0038160	CG9759	32.7694	72.503	4.99758e-08	0.451973
FBgn0031805	CG9505	3.10686	7.13195	0.000363745	0.435626
FBgn0039241	CG11089	29.7106	68.3868	1.45631e-13	0.43445
FBgn0034328	IM23	25.8611	59.6768	0.0214445	0.433353
FBgn0003965	v	14.324	33.6994	1.95522e-09	0.425053
FBgn0039564	CG5527	2.21268	6.40254	9.39777e-05	0.345594
FBgn0031701	TotM	11.6453	35.0984	0.011361	0.33179
FBgn0036850	Gem2	1.32336	4.04537	0.0474321	0.32713
FBgn0040993	CG17325	77.7788	256.319	1.97116e-38	0.303445
FBgn0039239	CG13641	2.50963	8.9484	0.00213214	0.280455
FBgn0014454	Acp1	0.865458	3.96619	0.0100062	0.218209
FBgn0052029	Cpr66D	0.237715	2.08557	0.0165367	0.113981

## Sheet: VFG_VBer
Gene	Symbol	Mean FPKM VFG	Mean FPKM Vber	FDR p-value	Fold change
FBgn0263830	CG40486	9.06587	0	4.62505e-17	#DIV/0!
FBgn0028519	CG4500	2.90028	0.0399083	6.91028e-11	72.6735
FBgn0003082	phr	4.60131	0.254822	5.86598e-19	18.0569
FBgn0262808	CG43179	8.09985	0.47447	8.63195e-06	17.0713		Higher VFG
FBgn0053459	CG33459	3.31122	0.218945	0.00451657	15.1235		Higher Vber
FBgn0051664	CG31664	5.32001	0.483304	1.05879e-11	11.0076
FBgn0000473	Cyp6a2	3.77892	0.548618	2.47843e-06	6.88807
FBgn0050148	CG30148	5.2442	0.810767	0.00176631	6.46819
FBgn0050098	CG30098	11.5356	1.98568	3.58133e-06	5.80941
FBgn0262150	CG42876	3.18831	0.550265	0.00506208	5.79413
FBgn0040629	CG18673	24.4472	4.28579	4.5058e-21	5.70424
FBgn0039325	CG10560	29.6187	5.24409	7.53548e-34	5.64802
FBgn0037229	CG9766	3.75335	0.687721	0.00868359	5.45767
FBgn0039052	CG6733	3.93445	0.729748	0.000263061	5.39151
FBgn0058160	CG40160	14.7409	3.63505	2.69126e-18	4.05521
FBgn0026144	CBP	2.81569	0.701715	0.0004711	4.01258
FBgn0004191	snRNA:U2:34ABa	30.1482	7.81415	7.84539e-05	3.85815
FBgn0039483	CG14259	36.8982	9.59823	6.67684e-25	3.84427
FBgn0027074	CG17324	4.8065	1.28833	0.000909199	3.73081
FBgn0038301	CG6654	10.0507	2.83364	3.29841e-13	3.54692
FBgn0034253	CG10936	4.39005	1.26482	1.84558e-13	3.47089
FBgn0033205	CG2064	6.49927	1.90865	0.0340962	3.40516
FBgn0039312	CG10514	5.66907	1.69356	0.00113592	3.34742
FBgn0036750	CG6034	4.97121	1.54715	0.00103836	3.21314
FBgn0033978	Cyp6a23	20.9183	6.9619	5.31143e-17	3.00469
FBgn0036022	CG8329	1285.24	435.13	1.1185e-66	2.9537
FBgn0053105	p24-2	21.0762	7.35403	1.61361e-37	2.86594
FBgn0051300	CG31300	9.23904	3.24702	2.30387e-05	2.84539
FBgn0041712	yellow-d	15.6445	5.54394	7.12979e-11	2.82191
FBgn0261393	alpha-Est5	5.00833	1.78867	0.0129364	2.80004
FBgn0034126	CG4398	17.5257	6.26805	2.28539e-06	2.79604
FBgn0261380	mRpL37	14.0048	5.15924	8.1388e-09	2.7145
FBgn0053503	Cyp12d1-d	5.17058	2.02359	8.67164e-05	2.55515
FBgn0002905	mus308	2.13374	0.864308	0.000320482	2.46873
FBgn0042173	CG18853	12.2033	4.96946	9.895e-09	2.45565
FBgn0033521	CG12896	9.37267	3.82124	0.000153914	2.45278
FBgn0035575	CG7509	5.16851	2.16434	0.0288686	2.38803
FBgn0030588	CG9521	10.2537	4.41392	1.27101e-06	2.32304
FBgn0036015	CG3088	1047.65	468.482	6.05496e-29	2.23627
FBgn0260463	Unc-115b	19.7991	8.95141	4.87766e-36	2.21184
FBgn0058470	CG40470	13.4566	6.11642	1.99873e-09	2.20008
FBgn0027348	bgm	88.7946	40.449	3.83974e-25	2.19522
FBgn0033520	Prx2540-1	18.252	8.33934	1.12119e-05	2.18867
FBgn0034381	List	11.5338	5.27497	0.00525862	2.18651
FBgn0026268	antdh	37.2858	17.0832	8.3255e-08	2.18261
FBgn0038830	CG17272	12.2271	5.72668	0.0242786	2.13511
FBgn0040211	hgo	22.1699	10.3949	0.000240238	2.13277
FBgn0050489	Cyp12d1-p	7.05363	3.34562	0.000472225	2.10832
FBgn0037979	CG3532	12.3388	5.90067	2.61372e-10	2.09109
FBgn0036910	Cyp305a1	14.7418	7.05875	0.000100221	2.08844
FBgn0030773	CG9676	725.041	352.118	4.80697e-29	2.05908
FBgn0033093	CG3270	15.3828	7.49119	9.59044e-05	2.05345
FBgn0039613	CG14527	3.57367	1.74378	0.0267797	2.04938
FBgn0050295	Ipk1	8.5595	4.20833	0.00193089	2.03394
FBgn0051352	Unc-115a	27.0471	13.5319	9.14293e-19	1.99876
FBgn0036752	Adgf-A	12.5525	6.31638	2.70755e-06	1.9873
FBgn0032387	CG16965	5.04837	2.54806	0.0289952	1.98126
FBgn0036290	CG10638	24.2147	12.2539	4.65263e-06	1.97608
FBgn0034117	CG7997	34.8663	17.6505	2.00131e-08	1.97538
FBgn0030589	CG9519	13.3328	6.81223	6.69193e-05	1.95719
FBgn0040571	CG17193	6.49908	3.32691	3.4542e-05	1.95349
FBgn0052843	Dh31-R1	4.75478	2.45059	0.00127303	1.94026
FBgn0034136	DAT	3.78214	1.96359	0.0148251	1.92614
FBgn0085256	CG34227	123.566	64.1815	5.192e-07	1.92525
FBgn0038236	Cyp313a1	90.4247	47.1771	2.696e-13	1.91671
FBgn0038820	CG4000	155.882	81.9335	3.81044e-12	1.90255
FBgn0043455	CG5986	20.464	10.7716	0.0260107	1.89981
FBgn0039040	CG13833	13.6364	7.2593	0.0208884	1.87847
FBgn0027657	glob1	305.76	163.288	2.696e-13	1.87252
FBgn0040502	CG8343	1327.75	709.577	7.09665e-19	1.87119
FBgn0030259	CG1545	17.1286	9.21051	0.0420112	1.85968
FBgn0042175	CG18858	19.9457	10.8739	1.33596e-08	1.83428
FBgn0030882	GS	17.7196	9.66122	2.31223e-06	1.8341
FBgn0052495	CG32495	17.7196	9.66122	2.51816e-06	1.8341
FBgn0037228	CG1092	21.5762	11.8618	0.00108648	1.81896
FBgn0050382	CG30382	25.9822	14.3476	3.54112e-06	1.8109
FBgn0263121	Prosalpha1	25.6246	14.1861	3.55112e-06	1.80632
FBgn0035986	CG4022	9.39399	5.21959	0.000148591	1.79976
FBgn0034480	CG16898	11.7764	6.54772	0.0275484	1.79855
FBgn0003920	snRNA:U2:14B	15.0223	8.36918	0.045928	1.79496
FBgn0003922	snRNA:U2:38ABa	15.0223	8.36918	0.045928	1.79496
FBgn0002868	MtnA	1279.7	713.868	7.40043e-15	1.79262
FBgn0051683	CG31683	16.4768	9.40908	2.34272e-07	1.75116
FBgn0259714	CG42368	6.46438	3.69513	0.0113464	1.74943
FBgn0037697	GstZ2	26.0264	15.016	0.00127731	1.73325
FBgn0039485	CG17189	29.352	17.0543	0.00451657	1.72109
FBgn0032945	CG8665	23.6957	13.7707	2.10949e-07	1.72073
FBgn0063498	GstE2	18.8803	11.0444	0.0398399	1.7095
FBgn0085342	CG34313	27.1153	15.8675	1.06894e-05	1.70886
FBgn0039703	CG7829	143.413	84.7727	1.33596e-08	1.69173
FBgn0033367	proPO45	30.385	17.962	3.45373e-06	1.69162
FBgn0039341	CG5112	11.2898	6.75799	0.0131228	1.67059
FBgn0032785	CG10026	24.589	14.9524	0.00950549	1.64448
FBgn0038290	CG6912	31.6389	19.3405	0.000472225	1.63589
FBgn0025878	wrapper	11.9238	7.3617	0.0298261	1.61971
FBgn0025712	CG13920	18.3621	11.3592	0.0176397	1.6165
FBgn0261575	tobi	388.734	241.878	0.00634448	1.60715
FBgn0030895	CG7135	21.3391	13.4495	0.0259165	1.58661
FBgn0259733	tal-AA	22.3741	14.164	0.00576783	1.57964
FBgn0027586	CG5867	156.004	98.9	2.21139e-06	1.5774
FBgn0053543	CG33543	12.9929	8.32564	0.015596	1.56059
FBgn0039678	Obp99a	548.859	353.056	0.000455366	1.5546
FBgn0036992	CG11796	96.2743	62.0016	0.000193158	1.55277
FBgn0038733	CG11407	41.302	26.6652	0.000761529	1.54891
FBgn0038665	CG12269	92.3216	59.6099	0.0307461	1.54876
FBgn0069973	CG40485	60.6418	39.1873	0.000240238	1.54749
FBgn0004118	nAcRbeta-96A	11.8893	7.68838	0.00713794	1.54639
FBgn0030237	CG15209	85.5006	55.41	0.00186744	1.54305
FBgn0039611	CG14528	39.391	25.5835	0.000256135	1.5397
FBgn0033268	Obp44a	553.382	360.363	5.10014e-07	1.53562
FBgn0031694	Cyp4ac2	19.1836	12.5274	0.0364709	1.53134
FBgn0032494	CG5945	216.608	142.622	6.26894e-06	1.51876
FBgn0023511	Edem1	10.2893	6.81727	0.0355938	1.5093
FBgn0036272	CG4300	21.8129	14.4982	0.00634448	1.50452
FBgn0036560	CG5895	22.5544	14.9988	0.0370592	1.50375
FBgn0043806	CG32032	50.8191	33.8132	0.00714926	1.50294
FBgn0032286	CG7300	40.0805	26.7126	0.00039831	1.50043
FBgn0040349	CG3699	89.2537	59.7319	0.00746377	1.49424
FBgn0053143	CG33143	9.68981	6.51202	0.0135706	1.48799
FBgn0261362	proPO-A1	33.2075	22.3452	0.00365318	1.48612
FBgn0037978	KLHL18	8.70388	5.86024	0.0418877	1.48524
FBgn0027932	Akap200	92.6146	62.7446	0.000627805	1.47606
FBgn0263508	CR43497	17.1725	11.646	0.0142622	1.47454
FBgn0031381	Npc2a	114.245	77.5477	0.00314813	1.47322
FBgn0030484	GstT4	37.1223	25.2054	0.0242786	1.47279
FBgn0051774	fred	6.22018	4.22775	0.023786	1.47127
FBgn0037976	Tk	22.8423	15.639	0.0195608	1.4606
FBgn0259734	CG42388	17.108	11.7248	0.0116789	1.45913
FBgn0051075	CG31075	38.9983	26.7299	0.00879192	1.45897
FBgn0033368	CG13743	12.1183	8.32126	0.0304835	1.45631
FBgn0032798	CG10132	11.5507	7.93613	0.015596	1.45546
FBgn0261046	Dscam3	7.41551	5.12306	0.00434387	1.44748
FBgn0000565	Eip71CD	52.3249	36.1839	0.0464879	1.44608
FBgn0025814	Mgstl	167.783	116.095	0.00185536	1.44523
FBgn0028984	Spn88Ea	27.9665	19.3755	0.0489617	1.44339
FBgn0051637	CG31637	18.3519	12.7338	0.0188273	1.4412
FBgn0002937	ninaB	32.249	22.4214	0.00873225	1.43831
FBgn0015872	Drip	24.0957	16.7657	0.0425992	1.4372
FBgn0032836	CG10680	267.533	186.24	0.00147092	1.4365
FBgn0027550	CG6495	27.4401	19.2384	0.0260117	1.42632
FBgn0262870	axo	10.8516	7.66642	0.00244342	1.41547
FBgn0004629	Cys	379.607	268.477	0.00147092	1.41393
FBgn0086778	gfA	30.0877	21.2909	0.0162296	1.41318
FBgn0031081	Nep3	16.2239	11.4841	0.0220493	1.41273
FBgn0260944	Rbp1	35.5259	25.231	0.0413392	1.40802
FBgn0085423	CG34394	26.5408	18.8614	0.0019009	1.40715
FBgn0036454	CG17839	53.791	38.2768	0.000516131	1.40532
FBgn0051973	Cda5	10.5115	7.50374	0.000209423	1.40084
FBgn0001991	Ca-alpha1D	19.4994	13.9404	0.00256069	1.39877
FBgn0038291	CG3984	33.0494	23.6472	0.0197996	1.39761
FBgn0052521	CG32521	177.534	127.066	0.000418005	1.39719
FBgn0051313	CG31313	159.523	114.481	0.0239112	1.39345
FBgn0261041	stj	23.6744	17.0571	0.0190304	1.38795
FBgn0261244	inaE	16.509	11.9228	0.0318523	1.38465
FBgn0034761	CG4250	214.445	155.22	0.00714926	1.38156
FBgn0042119	Cpr65Au	191.542	139.006	0.0288686	1.37794
FBgn0259108	futsch	42.9784	31.2319	0.00282974	1.3761
FBgn0030828	CG5162	41.3845	30.1716	0.0395514	1.37164
FBgn0033544	CG7220	82.7031	60.453	0.00350079	1.36806
FBgn0038516	CG5840	57.754	42.2307	0.000686136	1.36758
FBgn0013675	mt:CoII	2280.32	1667.79	0.00121593	1.36727
FBgn0000406	Cyt-b5-r	318.831	233.543	0.00119445	1.36519
FBgn0037705	mura	35.5626	26.1407	0.00714926	1.36043
FBgn0261797	Dhc64C	12.4088	9.20088	0.01543	1.34866
FBgn0263354	CG42784	38.0192	28.2675	0.0259462	1.34498
FBgn0085434	NaCP60E	39.4354	29.3539	0.01942	1.34345
FBgn0029828	CG6067	99.6022	74.1476	0.0175919	1.3433
FBgn0031424	VGlut	30.8879	23.0087	0.0379895	1.34244
FBgn0015609	CadN	19.194	14.3509	0.0148251	1.33747
FBgn0260745	mfas	74.6081	55.8887	0.00890534	1.33494
FBgn0036623	CG4729	87.0572	65.5121	0.0160779	1.32887
FBgn0261262	CG42613	111.233	83.7264	0.0318523	1.32853
FBgn0011666	msi	29.5046	22.2193	0.0304835	1.32788
FBgn0027843	CAH2	50.2172	37.8565	0.0437589	1.32651
FBgn0030706	CG8909	18.5829	14.0517	0.0457342	1.32247
FBgn0003748	Treh	108.847	82.4993	0.015596	1.31937
FBgn0011722	Tig	35.8853	27.4109	0.0206515	1.30916
FBgn0004575	Syn	65.782	50.4492	0.0286089	1.30393
FBgn0001234	Hsromega	139.544	110.451	7.4113e-13	1.2634
FBgn0035977	PGRP-LF	4.91973	3.89787	4.92616e-05	1.26216
FBgn0026206	mei-P26	48.8952	39.878	0.00631278	1.22612
FBgn0029738	CG4068	30.4458	31.7991	0.0338329	0.957441
FBgn0031857	CG11321	11.7845	13.1209	0.0260872	0.898148
FBgn0087035	AGO2	73.4221	82.5548	0.0129114	0.889374
FBgn0020618	Rack1	659.696	744.776	0.0434108	0.885764
FBgn0002593	RpLP1	1297.54	1472.12	0.0434108	0.881407
FBgn0000556	Ef1alpha48D	3781.17	4296.14	0.047565	0.880133
FBgn0010078	RpL23	1094.41	1252.47	0.0163171	0.873804
FBgn0024733	RpL10	907.776	1041.76	0.0422444	0.871389
FBgn0086710	RpL30	475.918	546.495	0.0289291	0.870856
FBgn0011284	RpS4	654.47	751.87	0.0313311	0.870457
FBgn0002622	RpS3	623.02	717.522	0.0223687	0.868294
FBgn0020910	RpL3	690.301	795.329	0.0304835	0.867944
FBgn0066084	RpL41	2233.27	2574.3	0.0231887	0.867524
FBgn0023170	RpL39	992.476	1144.17	0.0344337	0.86742
FBgn0261596	RpS24	557.623	643.192	0.0441842	0.866963
FBgn0031645	CG3036	96.9526	111.873	0.0393064	0.866633
FBgn0010265	RpS13	899.439	1039.18	0.0127555	0.86553
FBgn0004403	RpS14a	518.723	604.456	0.0304551	0.858165
FBgn0261599	RpS29	1368.7	1595.9	0.00738062	0.857635
FBgn0259736	CG42390	23.7987	27.8163	0.0420112	0.855569
FBgn0033504	CAP	47.8905	55.991	0.0286089	0.855326
FBgn0029897	RpL17	405.661	475.049	0.0213652	0.853934
FBgn0086676	spin	44.6991	52.5441	0.0395514	0.850698
FBgn0037298	CG2604	68.7194	80.8304	0.0387285	0.850168
FBgn0039857	RpL6	767.994	903.448	0.00807042	0.850071
FBgn0030157	CG1468	281.317	331.204	0.0242786	0.849378
FBgn0039359	RpL27	813.501	958.29	0.0242786	0.848908
FBgn0003149	Prm	44.0642	51.908	0.0182743	0.84889
FBgn0041182	Tep2	121.388	143.397	0.0371558	0.846517
FBgn0033555	RpS15Ab	87.9556	103.967	0.0186364	0.845993
FBgn0260462	CG12163	120.894	143	0.0372378	0.845417
FBgn0263987	spoon	41.3424	48.9715	0.0148251	0.844214
FBgn0002780	mod	39.7685	47.1699	0.0432178	0.843091
FBgn0026252	msk	25.0295	29.7534	0.0437589	0.84123
FBgn0027580	CG1516	101.803	121.121	0.0328605	0.840509
FBgn0019936	RpS20	816.636	974.243	0.00873225	0.838226
FBgn0002121	l(2)gl	16.3024	19.4822	0.0188737	0.836781
FBgn0034145	CG5065	53.6769	64.2113	0.00514237	0.835941
FBgn0032129	jp	23.1496	27.7246	0.0220069	0.834985
FBgn0030251	CG2145	67.9258	81.4716	0.0186046	0.833736
FBgn0085767	CR40685	276.226	332.034	0.0461424	0.831921
FBgn0038662	Mpc1	99.7703	120.293	0.0343101	0.829392
FBgn0035630	CG10576	50.6575	61.3049	0.031453	0.82632
FBgn0035227	CG12090	21.181	25.7606	0.0266662	0.822223
FBgn0026576	CG5991	86.4162	105.285	0.00890534	0.820787
FBgn0010198	RpS15Aa	664.577	811.088	0.00138236	0.819364
FBgn0040985	CG6115	154.485	188.625	0.0166868	0.819006
FBgn0034501	CG13868	120.358	147.052	0.00205115	0.818468
FBgn0035438	PHGPx	77.5014	95.1449	0.0461424	0.814561
FBgn0051205	CG31205	96.6593	118.739	0.0294443	0.814048
FBgn0013949	Ela	60.4789	74.4237	0.0344557	0.812629
FBgn0085826	CR41620	445.513	549.47	0.0457634	0.810804
FBgn0001257	ImpL2	41.3777	51.1433	0.0123621	0.809054
FBgn0033879	CG6543	98.1985	121.655	0.0387235	0.807188
FBgn0027619	Adam	50.526	62.7328	0.015799	0.805415
FBgn0042201	Nplp3	1103.65	1374.52	0.00344745	0.80293
FBgn0259938	cwo	20.1826	25.1376	0.00492985	0.802887
FBgn0035205	CG2469	14.4397	18.0002	0.0220069	0.802193
FBgn0250731	5.8SrRNA:CR40454	1686.25	2109.43	0.0395005	0.799385
FBgn0031069	Pmp70	37.3173	46.7324	0.00458674	0.798532
FBgn0036821	CG3961	114.334	143.741	0.000536153	0.795419
FBgn0026761	Trap1	15.8754	19.9602	0.0489441	0.795351
FBgn0034914	CG5554	22.6136	28.4459	0.0395005	0.794969
FBgn0014455	Ahcy13	35.1759	44.3067	0.0295911	0.793917
FBgn0023507	CG3835	53.9805	68.068	0.00317	0.793039
FBgn0038914	fit	972.906	1229.49	0.0199891	0.791309
FBgn0027611	LM408	145.033	184.77	4.92616e-05	0.784938
FBgn0053470	CG33470	113.828	145.132	0.0113102	0.784305
FBgn0033835	IM10	113.328	144.767	0.0259462	0.782831
FBgn0034290	CG5773	156.044	199.831	0.00104137	0.780879
FBgn0086367	t	44.0983	56.4752	0.00277803	0.780845
FBgn0031907	CG5171	52.79	67.6069	0.00745868	0.780837
FBgn0263321	CG43402	63.2193	81.0021	0.0259089	0.780466
FBgn0036975	CG5618	47.7051	62.5394	0.00181077	0.762801
FBgn0032889	CG9331	68.4041	89.7639	0.0026723	0.762045
FBgn0034140	CG8317	63.866	84.7261	0.00353074	0.753794
FBgn0032820	fbp	98.6917	131.021	0.00139046	0.753249
FBgn0031936	CG13794	22.5087	30.0155	0.0259462	0.749901
FBgn0035975	PGRP-LA	34.6111	46.2723	0.0016407	0.747988
FBgn0026593	CG5707	37.0291	49.561	0.0027675	0.747141
FBgn0029639	CG14419	69.904	93.955	0.00196132	0.744016
FBgn0004852	Ac76E	9.38771	12.619	0.000935362	0.743932
FBgn0261625	CG42708	9.87776	13.2844	0.0310165	0.743561
FBgn0011296	l(2)efl	32.3556	43.5322	0.0202324	0.743258
FBgn0031913	CG5958	72.6394	97.7798	0.000759805	0.742888
FBgn0032835	CG16772	134.338	180.88	0.00430412	0.74269
FBgn0034628	Acox57D-p	8.83638	11.9029	0.0344337	0.742372
FBgn0014018	Rel	26.171	35.2943	0.00036296	0.741509
FBgn0025583	IM2	646.598	873.472	0.00039831	0.740262
FBgn0030262	Vago	49.3147	66.683	0.00805914	0.73954
FBgn0030041	CG12116	110.483	149.566	0.000253765	0.738695
FBgn0031697	CG14024	15.1581	20.5322	0.00530556	0.738263
FBgn0010651	l(2)08717	31.6174	42.8522	0.00542918	0.737825
FBgn0033065	Cyp6w1	63.8551	87.1905	9.16142e-06	0.732363
FBgn0086704	stops	17.8477	24.5033	0.00591145	0.728381
FBgn0063494	GstE6	45.7983	62.9482	0.00244096	0.727555
FBgn0031970	CG7227	15.7415	21.6585	0.0269232	0.726804
FBgn0087007	bbg	10.0735	13.9187	0.000881968	0.723738
FBgn0033373	CG8080	13.1241	18.1445	0.0239112	0.723307
FBgn0033261	CG18316	23.8658	33.0458	0.000349516	0.722205
FBgn0040736	IM3	738.971	1028.03	0.000273025	0.718823
FBgn0067905	IM14	582.44	810.775	0.00115606	0.718375
FBgn0025621	CG16989	6.84111	9.52564	0.014159	0.718179
FBgn0031560	CG16713	109.995	154.134	0.0189154	0.713628
FBgn0040305	MTF-1	7.1955	10.089	0.0420112	0.713202
FBgn0010590	Prosbeta1	25.6916	36.1042	0.017838	0.711596
FBgn0043578	PGRP-SB1	165.124	232.197	6.64731e-05	0.711139
FBgn0026314	Ugt35b	16.7749	23.6028	0.00137699	0.710718
FBgn0034860	CG9812	102.524	144.369	2.25722e-06	0.710148
FBgn0030013	GIIIspla2	18.7178	26.3861	0.00714926	0.709382
FBgn0024957	Irp-1B	29.4277	41.8412	0.000157647	0.703318
FBgn0031395	CG10874	11.6444	16.6557	0.00506205	0.699124
FBgn0031489	CG17224	32.9868	47.1835	0.00170209	0.699117
FBgn0035880	CG17352	84.1519	120.687	6.88083e-10	0.697274
FBgn0034438	CG9416	6.08258	8.72729	0.00565843	0.696961
FBgn0038346	CG14872	19.6094	28.1517	0.0113102	0.696563
FBgn0038160	CG9759	72.503	104.289	0.000127595	0.695215
FBgn0263837	CG44774	8.94419	12.8814	0.00634448	0.694347
FBgn0013269	FK506-bp1	14.6706	21.1614	0.0107318	0.693274
FBgn0012036	Aldh	324.848	469.575	3.06865e-10	0.691793
FBgn0038473	Ns1	7.91219	11.4534	0.0159038	0.690814
FBgn0030364	CG15735	16.9818	24.585	0.0184914	0.690739
FBgn0050410	Rpi	22.6377	32.8411	0.0100699	0.68931
FBgn0050052	Obp49a	83.6105	121.403	8.45098e-06	0.6887
FBgn0259238	CG42336	67.3582	97.962	0.000167523	0.687595
FBgn0038654	CG14298	27.5903	40.2353	0.0304835	0.685723
FBgn0037819	CG14688	61.5648	90.193	4.14142e-06	0.68259
FBgn0033101	CG9436	25.2324	36.9829	0.000471105	0.682271
FBgn0019643	Dat	33.1756	48.8594	3.16773e-06	0.679002
FBgn0039827	CG1544	6.03238	8.91236	0.00358043	0.676855
FBgn0036997	CG5955	18.0345	26.6937	0.00185536	0.675608
FBgn0030218	CG1628	17.2081	25.5246	0.00036296	0.674178
FBgn0015714	Cyp6a17	17.1763	25.8247	0.00104137	0.665111
FBgn0013307	Odc1	34.8119	52.4142	7.12191e-07	0.664169
FBgn0263510	nclb	7.49539	11.29	0.0353848	0.663894
FBgn0032919	CG9253	20.2927	30.5854	0.000155222	0.663475
FBgn0038299	Spn88Eb	26.5824	40.1519	0.0395514	0.662047
FBgn0037144	CG7458	3.35378	5.08227	0.0377747	0.659897
FBgn0021738	Crg-1	8.18869	12.544	0.0313095	0.6528
FBgn0029766	CG15784	54.4686	83.4938	1.40277e-07	0.652367
FBgn0032322	CG16743	31.043	47.9116	0.000150612	0.647923
FBgn0040582	CG5791	78.5679	121.748	0.0168844	0.645334
FBgn0033375	CG8078	3.73727	5.79312	0.0140346	0.645122
FBgn0085194	CG34165	21.772	34.0488	0.0312478	0.639436
FBgn0037684	CG8129	11.715	18.3476	5.38797e-06	0.638504
FBgn0033170	sPLA2	31.1136	48.7508	0.000432888	0.638217
FBgn0032283	CG7296	35.3164	55.4681	0.000114525	0.636698
FBgn0037327	PEK	13.2951	20.9311	7.40395e-09	0.635183
FBgn0035770	pst	130.248	205.807	7.42272e-14	0.632866
FBgn0033836	CG18278	3.47382	5.51945	0.00842595	0.629378
FBgn0040734	CG15065	186.211	297.104	0.00185536	0.626752
FBgn0034470	Obp56d	551.894	889.597	3.35409e-15	0.620386
FBgn0030511	CG11158	5.53246	8.97815	0.0275525	0.616214
FBgn0053092	P5CDh2	5.56058	9.13408	0.00565365	0.608773
FBgn0033980	Cyp6a20	31.3501	51.6713	5.16184e-10	0.606722
FBgn0030270	CG15199	11.4981	18.9628	0.0198271	0.606349
FBgn0032116	Mco1	4.17139	6.89228	0.00144765	0.605227
FBgn0034390	CG15093	27.5206	45.6881	1.34705e-07	0.602358
FBgn0260475	CG30059	3.66606	6.09892	0.00201376	0.601099
FBgn0034479	CG8654	28.6962	48.0979	1.15037e-09	0.59662
FBgn0034356	CG10924	14.771	25.0574	6.20919e-08	0.589487
FBgn0001083	fw	2.46011	4.21547	0.00185536	0.583591
FBgn0036875	CG9449	6.60469	11.3963	0.00879192	0.579547
FBgn0002563	Lsp1beta	1121.88	1959.29	5.16044e-09	0.572597
FBgn0033593	Listericin	110.518	193.71	2.19329e-09	0.570535
FBgn0011596	fzo	2.92728	5.13237	0.0192817	0.570357
FBgn0031801	CG9498	21.385	37.6081	9.70489e-10	0.568628
FBgn0032470	CG5142	2.94944	5.20815	0.0234634	0.566313
FBgn0262570	CG43110	4.33475	7.70528	0.0103459	0.562569
FBgn0013681	mt:ND3	256.938	459.012	3.27327e-06	0.559763
FBgn0259937	Nop60B	10.6602	19.1044	7.33059e-06	0.558001
FBgn0015038	Cyp9b1	5.8551	10.5462	0.0369029	0.555185
FBgn0034076	Jhedup	5.27275	9.59522	0.00102754	0.549518
FBgn0041579	AttC	163.748	299.049	0.000273025	0.547561
FBgn0036995	CG5195	1.29682	2.38671	0.00805914	0.543349
FBgn0035282	CG13936	5.31327	9.78082	0.0372378	0.543233
FBgn0035089	Phk-3	20.4445	37.7189	0.000106064	0.542023
FBgn0015035	Cyp4e3	15.0772	28.04	3.87893e-06	0.537705
FBgn0004240	Dpt	142.634	265.368	0.00277803	0.537495
FBgn0029507	Tsp42Ed	8.26816	15.4878	0.00213559	0.533849
FBgn0010222	Nmdmc	31.4657	59.1161	1.38489e-12	0.53227
FBgn0011283	Obp28a	13.2171	24.865	0.00132875	0.531553
FBgn0041581	AttB	33.0721	62.2196	0.00170209	0.531539
FBgn0040890	ksh	5.91422	11.1432	0.0425992	0.530746
FBgn0013672	mt:ATPase6	2084.32	3951.12	2.61915e-18	0.527526
FBgn0001223	Hsp22	7.41504	14.2678	0.0059584	0.519705
FBgn0051465	CG31465	3.38015	6.52788	1.39026e-06	0.517802
FBgn0040732	CG16926	127.786	247.792	2.75878e-21	0.515697
FBgn0039316	CG11893	11.4442	22.2142	6.0365e-06	0.515175
FBgn0005670	Cyp4d1	4.96272	9.64382	0.000106064	0.514601
FBgn0040256	Ugt86Dd	29.8669	58.408	4.68836e-15	0.511349
FBgn0033926	Arc1	46.4584	91.1441	6.67231e-19	0.509725
FBgn0034538	CG16799	10.4469	20.6272	0.000226504	0.506465
FBgn0032819	CG10463	1.79123	3.54785	0.014159	0.504877
FBgn0033760	CG8785	2.85893	5.69603	0.00370325	0.501916
FBgn0013953	Esp	1.26449	2.53077	0.0420112	0.499646
FBgn0033458	CG18446	2.16527	4.33779	0.0123102	0.499165
FBgn0033257	CG8713	5.67384	11.4044	9.14448e-06	0.497511
FBgn0052475	mthl8	2.77761	5.62529	3.16576e-05	0.493771
FBgn0034407	DptB	197.933	401.088	0.000204087	0.49349
FBgn0028855	CG15282	20.9193	42.4906	0.000157647	0.492327
FBgn0033927	CR10102	28.5682	58.2655	5.10281e-17	0.490311
FBgn0037126	CG14567	14.8289	31.3669	4.35757e-05	0.472757
FBgn0035539	slow	2.76819	5.88854	0.00126245	0.470098
FBgn0037396	CG11459	4.90683	10.4935	0.0433355	0.467605
FBgn0014865	Mtk	551.992	1187.89	5.63224e-08	0.464683
FBgn0028537	CG31775	6.71379	14.522	0.00585798	0.462319
FBgn0260954	CG42586	6.71379	14.522	0.00585798	0.462319
FBgn0033904	CG18327	8.07165	17.8816	1.52676e-05	0.451393
FBgn0035583	CG13704	11.6217	25.7616	2.22381e-06	0.451125
FBgn0263454	CR43477	2.29188	5.09215	0.0276985	0.450082
FBgn0043791	CG8147	21.4292	47.8823	5.7547e-13	0.447539
FBgn0034493	CG8908	0.510215	1.15007	0.0367223	0.443639
FBgn0034943	Fmo-1	6.40993	14.5463	2.12632e-06	0.440656
FBgn0012042	AttA	26.0891	60.3103	5.19449e-05	0.432582
FBgn0037167	CG11425	4.84037	11.3023	0.00506205	0.428264
FBgn0038631	CG7695	5.53732	12.9341	0.0203218	0.428118
FBgn0036143	CG14142	0.721225	1.70201	0.0449731	0.423748
FBgn0263113	CG43370	0.548899	1.30348	0.0437589	0.421103
FBgn0013772	Cyp6a8	5.00922	12.2736	3.04118e-10	0.408128
FBgn0000276	CecA1	13.3831	32.9396	0.00121593	0.406293
FBgn0262366	CG43064	3.56629	8.84634	0.00039831	0.403138
FBgn0031490	CG17264	1.418	3.60389	0.0186364	0.393464
FBgn0036332	CG11261	1.08956	2.79357	0.0114289	0.390026
FBgn0033397	Cyp4p3	2.40485	6.24515	0.000858034	0.385074
FBgn0038074	CG6188	16.8895	44.7247	1.67093e-12	0.377632
FBgn0052850	CG32850	55.5734	148.883	9.72214e-47	0.373269
FBgn0053926	CG33926	12.5605	33.8364	3.94258e-06	0.371213
FBgn0033730	Cpr49Ag	9.83972	26.8028	9.80134e-10	0.367115
FBgn0028544	CG16884	1.00777	2.76574	0.0467056	0.364376
FBgn0031925	Cyp4d21	1.99382	5.50186	0.000169629	0.36239
FBgn0000277	CecA2	11.0099	30.6373	0.00350079	0.359363
FBgn0038002	CG12256	1.02671	2.87708	0.0117458	0.356858
FBgn0005664	Cry	0.870078	2.55842	0.00704914	0.340085
FBgn0040609	CG3348	11.4544	35.4123	1.37707e-12	0.32346
FBgn0034741	CG4269	5.11922	16.8203	0.00670584	0.304348
FBgn0036153	CG7573	1.59798	5.4121	3.58133e-06	0.29526
FBgn0028939	NimC2	1.01734	3.58685	2.18598e-05	0.283629
FBgn0000279	CecC	4.88087	17.2512	0.0010974	0.282929
FBgn0038142	CheA87a	4.89432	17.5235	4.21474e-07	0.2793
FBgn0040503	CG7763	1.06472	4.49131	0.00585798	0.237062
FBgn0262983	CG43291	0.778494	4.05596	0.0113464	0.191938
FBgn0039759	CG9733	0.502475	3.20807	0.000187598	0.156628
FBgn0262721	CG43165	0.265353	3.44464	0.00996822	0.0770337
FBgn0000278	CecB	0.235545	4.31628	0.0437589	0.0545713
FBgn0000564	Eh	0.0696007	1.7377	0.00448209	0.0400533
FBgn0030981	CG14191	0.285808	7.74674	1.51942e-09	0.036894

## Sheet: 1FG_VFG
Gene	Symbol	Mean FPKM 1FG	Mean FPKM VFG	FDR P-value	Fold Change
FBgn0028537	CG31775	95.9581	6.71379	3.21856e-57	14.2927
FBgn0260954	CG42586	95.9581	6.71379	2.04693e-55	14.2927
FBgn0082963	snoRNA:Psi28S-3378	7.14276	0.637543	0.0136323	11.2036		Induced by mating
FBgn0262721	CG43165	2.69624	0.265353	0.0062808	10.1609		Repressed by mating
FBgn0037167	CG11425	36.8456	4.84037	1.94388e-48	7.61215
FBgn0069056	CG33226	2.83135	0.490225	0.00485761	5.77561
FBgn0085755	CR40611	14.141	3.5457	8.95233e-20	3.98821
FBgn0005655	mus209	3.74621	0.947485	0.000240825	3.95385
FBgn0020633	Mcm7	1.23311	0.339145	0.00242733	3.63594
FBgn0263402	CG43448	5.24693	1.44836	0.00197777	3.62266
FBgn0040609	CG3348	39.9607	11.4544	2.76637e-13	3.48867
FBgn0037396	CG11459	17.0669	4.90683	2.73791e-18	3.47819
FBgn0052152	CG32152	3.39573	0.985604	0.000213483	3.44533
FBgn0036995	CG5195	4.16016	1.29682	6.36547e-14	3.20797
FBgn0051465	CG31465	10.4637	3.38015	1.07971e-32	3.09564
FBgn0032620	CG12288	2.29256	0.750968	0.00113689	3.05281
FBgn0033830	CG10814	7.68071	2.56303	0.00233683	2.99673
FBgn0046876	Obp83ef	22.0266	7.71098	1.05338e-09	2.85652
FBgn0032322	CG16743	88.656	31.043	3.37954e-35	2.85591
FBgn0041607	asparagine-synthetase	101.901	36.0168	1.94388e-48	2.82927
FBgn0031805	CG9505	19.1581	7.13195	2.80169e-24	2.68623
FBgn0036749	CG7460	2.52978	0.964315	0.00183217	2.6234
FBgn0034390	CG15093	71.1483	27.5206	4.80811e-28	2.58527
FBgn0052251	Claspin	1.73294	0.687954	2.38903e-06	2.51897
FBgn0023535	arg	5.31599	2.21237	0.00362487	2.40285
FBgn0038609	Nup43	2.64519	1.11556	0.0467011	2.37117
FBgn0046878	Obp83cd	16.3252	6.93197	3.04247e-07	2.35506
FBgn0013949	Ela	142.286	60.4789	2.3991e-30	2.35266
FBgn0259238	CG42336	157.97	67.3582	2.67048e-29	2.34522
FBgn0085744	CR40561	4.70155	2.01738	1.09179e-11	2.33052
FBgn0085818	CR41608	50.7466	21.8378	6.7248e-16	2.32379
FBgn0010222	Nmdmc	72.9063	31.4657	2.98956e-14	2.31701
FBgn0085803	CR41550	65.1798	28.8164	1.98406e-16	2.2619
FBgn0033397	Cyp4p3	5.34566	2.40485	0.000277341	2.22287
FBgn0085756	CR40613	23.4035	10.6477	3.25764e-15	2.19798
FBgn0085752	CR40594	45.4873	20.7584	6.22325e-16	2.19127
FBgn0030482	CG1673	62.1831	28.7731	1.46893e-33	2.16115
FBgn0011703	RnrL	2.24544	1.04235	0.0105513	2.15421
FBgn0026169	snoRNA:Psi18S-1820	28.2668	13.1761	0.0396232	2.14532
FBgn0039239	CG13641	19.0833	8.9484	0.000353117	2.1326
FBgn0053310	CG33310	2.65011	1.24404	0.00160914	2.13025
FBgn0030073	CG10962	38.982	18.3038	5.99355e-07	2.12972
FBgn0038074	CG6188	35.9611	16.8895	0.000112006	2.1292
FBgn0053092	P5CDh2	11.756	5.56058	3.19935e-11	2.11416
FBgn0263470	snoRNA:Tudor-SN-a	13.1539	6.25551	0.0253875	2.10277
FBgn0039094	CG10184	28.6562	13.6311	3.24215e-09	2.10227
FBgn0262531	CG43085	16.516	7.92764	5.16812e-06	2.08334
FBgn0028939	NimC2	2.10688	1.01734	0.00395375	2.07097
FBgn0031801	CG9498	43.6262	21.385	2.44496e-17	2.04003
FBgn0037801	CG3999	25.725	12.9744	3.76402e-14	1.98275
FBgn0002528	LanB2	20.1723	10.2592	6.32566e-24	1.96627
FBgn0038914	fit	1904.58	972.906	5.27457e-16	1.95762
FBgn0040340	TRAM	65.8399	33.7392	8.84177e-21	1.95143
FBgn0030305	CG1749	13.0179	6.72493	1.15427e-07	1.93577
FBgn0005391	Yp2	18574.5	9660.35	1.53155e-22	1.92275
FBgn0011016	SsRbeta	124.739	65.942	1.479e-19	1.89165
FBgn0052418	vito	6.89623	3.65304	0.00868492	1.88781
FBgn0031227	CG3709	3.18244	1.69291	0.0216066	1.87986
FBgn0031049	Sec61gamma	97.0903	51.8877	8.53851e-17	1.87116
FBgn0259937	Nop60B	19.9401	10.6602	4.82903e-09	1.87051
FBgn0039849	CG11334	20.7683	11.1671	1.07628e-08	1.85977
FBgn0026196	nop5	21.4036	11.5159	2.13842e-10	1.85861
FBgn0036622	CG4753	12.6621	6.83331	0.00325127	1.853
FBgn0039008	CG6972	8.67615	4.68762	0.00120035	1.85087
FBgn0036574	CG16838	1.66282	0.899352	0.00171133	1.84891
FBgn0035282	CG13936	9.67789	5.31327	0.00166287	1.82146
FBgn0086450	su(r)	35.9257	19.7968	1.90942e-15	1.81472
FBgn0020909	Rtc1	6.16816	3.39942	0.00723019	1.81448
FBgn0030725	CG8958	2.64555	1.46682	0.006997	1.80359
FBgn0038146	CG9799	5.48649	3.0482	2.2254e-05	1.79991
FBgn0039564	CG5527	11.5111	6.40254	7.56376e-09	1.79789
FBgn0025700	CG5885	114.673	63.9998	2.14494e-16	1.79177
FBgn0063449	Uhg2	9.28792	5.19553	0.0499945	1.78768
FBgn0025620	CG13360	65.8658	36.9506	2.53333e-19	1.78254
FBgn0086357	Sec61alpha	177.981	100.206	2.91597e-25	1.77615
FBgn0011704	RnrS	6.20329	3.49475	0.00208394	1.77503
FBgn0003062	Fib	19.5059	10.9947	5.78476e-07	1.77412
FBgn0026403	Ndg	18.5553	10.5007	8.77096e-16	1.76705
FBgn0047135	CG32276	339.266	192.346	3.94242e-20	1.76383
FBgn0032198	eEF1delta	212.271	120.461	1.32528e-22	1.76216
FBgn0036997	CG5955	31.6565	18.0345	1.57615e-10	1.75533
FBgn0030786	mRpL22	12.5851	7.19649	0.0023492	1.74878
FBgn0026143	CDC45L	3.49681	2.01856	0.00581606	1.73233
FBgn0002780	mod	68.5938	39.7685	1.40169e-17	1.72483
FBgn0025687	LKR	13.4091	7.79108	4.49218e-10	1.72108
FBgn0010638	Sec61beta	131.365	76.5427	1.83633e-17	1.71624
FBgn0036514	CG12301	5.69288	3.32267	0.000539602	1.71334
FBgn0030041	CG12116	187.378	110.483	2.51761e-18	1.69599
FBgn0014455	Ahcy13	59.6134	35.1759	1.84073e-13	1.69473
FBgn0003278	RpI135	3.7257	2.21624	0.00970591	1.68109
FBgn0031824	CG9547	14.5124	8.63841	3.02066e-06	1.67998
FBgn0039629	CG11842	13.3557	8.03261	0.00190201	1.66269
FBgn0034475	Obp56h	17.4588	10.5577	0.00600802	1.65366
FBgn0263005	CG43313	2.55942	1.55172	0.00875123	1.6494
FBgn0025140	pit	9.822	5.9753	1.60974e-05	1.64377
FBgn0000052	ade2	38.6837	23.7312	3.3332e-13	1.63008
FBgn0011509	SrpRbeta	18.2305	11.2385	0.000180264	1.62214
FBgn0038473	Ns1	12.7959	7.91219	2.25439e-05	1.61724
FBgn0037635	CG9837	39.7399	24.6655	4.70427e-07	1.61115
FBgn0015393	hoip	25.6408	15.9372	0.000172001	1.60886
FBgn0034538	CG16799	16.8056	10.4469	0.00362487	1.60866
FBgn0035121	Tudor-SN	59.5779	37.0547	4.4197e-19	1.60784
FBgn0037000	CG5130	5.25638	3.27182	0.00178641	1.60656
FBgn0030067	Rbm13	10.1426	6.33145	0.00841392	1.60194
FBgn0000964	tj	9.24618	5.77386	3.48e-07	1.60138
FBgn0083984	CG34148	13.4581	8.44666	0.000180537	1.5933
FBgn0039241	CG11089	108.46	68.3868	3.29755e-12	1.58598
FBgn0032136	Apoltp	117.41	74.178	2.0087e-15	1.58282
FBgn0027091	Aats-cys	11.9319	7.55248	7.43947e-06	1.57986
FBgn0031260	Spp	44.0829	28.006	2.0802e-10	1.57405
FBgn0263605	l(3)72Dn	2.89854	1.8421	0.0456966	1.5735
FBgn0020389	Papss	15.4481	9.87258	1.08483e-06	1.56475
FBgn0004926	eIF-2beta	82.7463	52.9142	1.09179e-11	1.56378
FBgn0034356	CG10924	22.9592	14.771	9.23545e-07	1.55434
FBgn0011296	l(2)efl	50.276	32.3556	2.67911e-06	1.55386
FBgn0034259	P32	16.082	10.3531	0.000499791	1.55336
FBgn0036460	CG5114	11.1258	7.16335	0.00524574	1.55315
FBgn0027094	Aats-ala	21.0805	13.5948	1.00946e-08	1.55062
FBgn0039175	CG5706	9.26416	5.97605	0.00325127	1.55021
FBgn0033936	CG17386	1.91511	1.2359	0.0469684	1.54957
FBgn0037930	CG14715	38.8488	25.0751	0.000119336	1.5493
FBgn0031865	Nha1	7.17964	4.63656	0.0028189	1.54849
FBgn0011824	CG4038	20.3165	13.1676	0.000448827	1.54292
FBgn0050349	CG30349	8.29879	5.41387	0.00528304	1.53288
FBgn0037010	CG4825	42.006	27.4206	2.81558e-09	1.53191
FBgn0038799	CG4288	13.7387	8.97545	7.45691e-06	1.5307
FBgn0086603	snoRNA:Or-CD2	103.793	67.9323	0.00408218	1.52789
FBgn0021795	Tapdelta	88.4086	58.2513	6.54662e-07	1.51771
FBgn0019952	Orct	14.3149	9.4616	0.000531214	1.51295
FBgn0035539	slow	4.18477	2.76819	0.0396232	1.51173
FBgn0036876	CG9451	57.6846	38.3754	4.31143e-05	1.50317
FBgn0028744	CG5033	8.65729	5.7755	0.00109903	1.49897
FBgn0036187	CG11660	4.83939	3.25599	0.0261558	1.4863
FBgn0040237	bor	9.41254	6.33609	0.00109903	1.48554
FBgn0027088	Aats-gly	15.8448	10.6771	5.62677e-06	1.48399
FBgn0013683	mt:ND4L	52.9554	35.7112	0.00376742	1.48288
FBgn0027086	Aats-ile	19.521	13.1708	1.0698e-08	1.48215
FBgn0013269	FK506-bp1	21.7207	14.6706	0.000140179	1.48055
FBgn0019925	Surf4	75.3177	51.0362	2.71119e-09	1.47577
FBgn0031913	CG5958	107.096	72.6394	1.61418e-07	1.47436
FBgn0033485	RpLP0-like	18.9724	12.8798	0.00363277	1.47304
FBgn0038964	Nop56	19.1794	13.0283	3.17621e-05	1.47214
FBgn0035630	CG10576	74.4653	50.6575	2.78654e-11	1.46998
FBgn0037137	Nopp140	14.7064	10.02	3.74696e-06	1.46771
FBgn0061492	loj	33.5517	22.8729	8.4442e-05	1.46687
FBgn0259184	CG42288	6.973	4.76009	0.0192728	1.46489
FBgn0035348	CG16758	304.164	208.13	2.21182e-11	1.46141
FBgn0037652	CG11980	16.2506	11.1256	0.00330897	1.46066
FBgn0032287	CG6415	66.0146	45.2978	8.68594e-09	1.45735
FBgn0038810	Srp72	15.0593	10.373	6.47133e-05	1.45178
FBgn0030720	CG8939	10.4021	7.16532	0.000358394	1.45173
FBgn0036254	CG5645	7.1199	4.9114	0.00112298	1.44967
FBgn0035909	ergic53	67.7763	46.9189	2.15027e-09	1.44454
FBgn0022160	Gpo-1	44.3634	30.7305	5.37011e-09	1.44363
FBgn0263510	nclb	10.8125	7.49539	0.0103921	1.44255
FBgn0250820	CG5802	23.4009	16.298	5.15536e-05	1.43581
FBgn0032408	CG6712	8.81848	6.15387	0.0323312	1.433
FBgn0052694	CG32694	19.7914	13.8338	1.02771e-05	1.43066
FBgn0022288	l(2)09851	10.1955	7.1288	0.00765217	1.43018
FBgn0053123	CG33123	11.9179	8.33403	3.34747e-05	1.43003
FBgn0035947	Srp68	22.0495	15.4829	3.2736e-05	1.42412
FBgn0035878	CG7182	6.77813	4.76485	0.0364613	1.42253
FBgn0264494	CG17646	36.9812	26.0036	1.32064e-06	1.42216
FBgn0027835	Dp1	95.6323	67.4826	2.11062e-12	1.41714
FBgn0032262	CG7384	7.22215	5.10231	0.0114265	1.41547
FBgn0000566	Eip55E	24.169	17.0802	0.000225176	1.41503
FBgn0034010	CG8157	21.1804	14.9714	0.0495015	1.41472
FBgn0038808	Srp14	32.1028	22.695	0.0304949	1.41453
FBgn0038968	CG12499	3.76573	2.66235	0.0103055	1.41444
FBgn0023213	eIF4G	111.741	79.0991	1.55632e-11	1.41267
FBgn0039562	Gp93	80.2342	56.8035	4.54882e-11	1.41249
FBgn0036975	CG5618	67.3112	47.7051	4.27056e-07	1.41099
FBgn0001257	ImpL2	58.2646	41.3777	1.7599e-09	1.40812
FBgn0033000	CG14464	24.5519	17.4962	0.0109895	1.40327
FBgn0004396	CrebA	31.9996	22.8262	4.45262e-10	1.40188
FBgn0026079	Nsun2	9.11558	6.50257	0.00209053	1.40184
FBgn0263321	CG43402	88.4463	63.2193	0.000140179	1.39904
FBgn0000053	ade3	49.5936	35.456	0.00039905	1.39874
FBgn0036300	CG10688	20.5954	14.7575	0.00358164	1.39559
FBgn0033661	CG13185	3.88167	2.7836	1.99889e-05	1.39448
FBgn0037819	CG14688	85.776	61.5648	2.62782e-07	1.39326
FBgn0085767	CR40685	383.187	276.226	0.0363023	1.38722
FBgn0034734	CG4554	3.03684	2.19159	0.00696978	1.38568
FBgn0037248	Spargel	7.42331	5.35731	0.000218125	1.38564
FBgn0262801	twr	71.6556	51.7166	7.04864e-06	1.38554
FBgn0033691	CG8860	76.0763	55.0245	0.0015625	1.38259
FBgn0033741	CG8545	10.5563	7.66133	0.000563393	1.37787
FBgn0085817	CR41607	1901.21	1382.43	4.85833e-07	1.37526
FBgn0016685	Nlp	34.7869	25.3644	9.79772e-05	1.37149
FBgn0027079	Aats-val	11.9972	8.75198	3.77647e-05	1.3708
FBgn0035911	CG6638	13.3452	9.74444	0.0192728	1.36952
FBgn0039735	CG7911	31.6961	23.2613	0.0193214	1.36261
FBgn0039450	CG5484	13.5218	9.93001	0.038373	1.36171
FBgn0069242	eca	34.8273	25.5774	2.20837e-05	1.36164
FBgn0263260	sel	32.3351	23.7711	0.00162772	1.36027
FBgn0028327	l(1)G0320	139.15	102.358	2.34629e-08	1.35944
FBgn0005648	Pabp2	22.0903	16.2527	4.9648e-05	1.35917
FBgn0023129	aay	206.164	151.706	8.81007e-09	1.35897
FBgn0037718	P58IPK	32.4637	23.9376	2.45143e-05	1.35618
FBgn0024957	Irp-1B	39.8815	29.4277	2.85835e-05	1.35524
FBgn0036857	CG9629	28.1991	20.8426	2.51324e-05	1.35296
FBgn0052267	CG32267	34.1961	25.2864	0.0429158	1.35235
FBgn0085777	CR40959	1944.21	1441.88	1.82676e-07	1.34838
FBgn0013672	mt:ATPase6	2807.19	2084.32	1.03615e-06	1.34681
FBgn0011638	La	28.8306	21.4288	0.000773578	1.34541
FBgn0029114	Tollo	3.66343	2.72649	0.00600802	1.34364
FBgn0033379	Mys45A	9.035	6.74073	0.0096985	1.34036
FBgn0022069	Nnp-1	9.03384	6.75166	0.00546424	1.33802
FBgn0039827	CG1544	8.0537	6.03238	0.00374698	1.33508
FBgn0010391	Gtp-bp	27.3416	20.4959	0.000113094	1.334
FBgn0039022	CG4725	11.9455	8.96124	0.00362487	1.33302
FBgn0039789	CG9717	9.23481	6.9315	0.00888362	1.3323
FBgn0030451	CG15717	23.2856	17.4838	0.0237163	1.33184
FBgn0025684	MFS18	8.97388	6.74396	0.0137426	1.33065
FBgn0023540	CG3630	22.8917	17.2099	0.00183229	1.33015
FBgn0036919	Grasp65	18.3989	13.8419	0.00581912	1.32922
FBgn0030504	CG2691	7.89159	5.93855	0.000540646	1.32888
FBgn0038524	sll	12.2227	9.20639	0.0261558	1.32763
FBgn0031497	CG17259	18.2597	13.7697	0.00311357	1.32608
FBgn0085774	CR40779	6320.04	4766.77	1.15228e-06	1.32585
FBgn0036686	CG7728	6.32567	4.77199	0.0200038	1.32558
FBgn0004045	Yp1	30415.5	22946.2	4.20933e-07	1.32551
FBgn0004852	Ac76E	12.4316	9.38771	3.14894e-06	1.32425
FBgn0051793	CG31793	10.2633	7.76867	0.00278125	1.32111
FBgn0037835	CG14687	75.6465	57.2616	7.12213e-05	1.32107
FBgn0030321	CG1703	21.8818	16.5722	8.85075e-05	1.32039
FBgn0002638	Rcc1	7.89174	5.98411	0.0216881	1.31878
FBgn0032915	CG12050	4.83969	3.67511	0.0474681	1.31689
FBgn0005674	Aats-glupro	18.6229	14.1564	7.55627e-05	1.31551
FBgn0031461	daw	30.6463	23.2986	0.000410176	1.31537
FBgn0038535	alt	57.1509	43.4491	4.47464e-07	1.31535
FBgn0029939	CG9650	5.46444	4.15444	0.000986993	1.31533
FBgn0034629	Acox57D-d	12.3346	9.3831	0.00628946	1.31455
FBgn0036147	Plod	13.6801	10.4109	0.00162078	1.31402
FBgn0052350	CG32350	11.8871	9.05582	0.00221648	1.31265
FBgn0033079	Fmo-2	50.0957	38.1823	0.000394655	1.31201
FBgn0010292	bys	11.5149	8.78434	0.0434355	1.31084
FBgn0019938	RpI1	5.82399	4.44708	0.000986993	1.30962
FBgn0030306	Spase25	62.2456	47.5422	0.000167002	1.30927
FBgn0021995	Rs1	8.48707	6.49871	0.0495015	1.30596
FBgn0013684	mt:ND5	477.11	366.198	0.000489726	1.30287
FBgn0033539	Git	5.45397	4.18615	0.03016	1.30286
FBgn0085807	CR41590	3257.69	2501.61	8.9685e-06	1.30224
FBgn0010470	Fkbp13	68.5259	52.6223	4.37793e-05	1.30222
FBgn0035189	CG9119	49.0169	37.652	0.0193072	1.30184
FBgn0051324	CG31324	25.3598	19.4952	7.05397e-05	1.30082
FBgn0033518	Prx2540-2	39.1018	30.1797	0.00166892	1.29564
FBgn0034290	CG5773	202.168	156.044	1.38421e-06	1.29558
FBgn0038829	CG17271	58.2372	44.9566	1.68977e-06	1.29541
FBgn0035049	Mmp1	9.64382	7.45768	0.00476934	1.29314
FBgn0001234	Hsromega	180.354	139.544	1.57615e-10	1.29245
FBgn0027080	Aats-tyr	19.8095	15.3295	0.00183651	1.29225
FBgn0023529	CG2918	77.7274	60.1786	1.51145e-06	1.29161
FBgn0036124	CG7839	8.09667	6.27181	0.010772	1.29096
FBgn0010621	Cct5	19.6266	15.2101	0.00172135	1.29037
FBgn0003162	Pu	76.7671	59.5032	8.89951e-06	1.29013
FBgn0028420	Kr-h1	23.0407	17.888	0.000308659	1.28805
FBgn0086443	Aats-asn	22.9073	17.7966	0.000349039	1.28717
FBgn0085827	CR41621	2212.88	1722.12	0.000172001	1.28497
FBgn0025678	CaBP1	40.9463	31.8682	0.000376977	1.28486
FBgn0034401	CG15100	6.1805	4.81282	0.0152885	1.28418
FBgn0036547	CG17032	47.92	37.3377	0.00146217	1.28342
FBgn0085815	CR41605	1935.35	1508.97	7.05397e-05	1.28256
FBgn0029715	CG11444	42.7791	33.3761	0.00135145	1.28173
FBgn0032482	Pect	89.2059	69.6326	0.00217688	1.28109
FBgn0027359	Tim8	28.4823	22.2338	0.040698	1.28103
FBgn0262952	mt:ND4	684.534	534.524	8.0449e-05	1.28064
FBgn0013678	mt:Cyt-b	3348.95	2617.66	4.95942e-05	1.27937
FBgn0030151	CG1354	28.5225	22.3077	0.00325127	1.2786
FBgn0032726	CG10621	151.379	118.747	1.4763e-05	1.2748
FBgn0036494	Toll-6	6.76732	5.31375	0.000691639	1.27355
FBgn0038467	CG3590	24.2653	19.0566	0.00376742	1.27333
FBgn0036337	CG11255	59.0975	46.4199	0.000306567	1.27311
FBgn0085757	CR40621	5020.11	3945.63	2.67902e-05	1.27232
FBgn0032919	CG9253	25.7823	20.2927	0.00378899	1.27052
FBgn0035162	CG13900	22.1158	17.4235	0.000614436	1.26931
FBgn0085769	CR40728	3070.11	2419.51	2.44844e-05	1.2689
FBgn0032773	fon	182.484	143.817	0.000237904	1.26886
FBgn0020443	Elf	41.162	32.4784	0.000100661	1.26737
FBgn0026252	msk	31.7135	25.0295	2.20837e-05	1.26705
FBgn0039938	Sox102F	28.051	22.1524	0.00349143	1.26627
FBgn0001218	Hsc70-3	306.516	242.171	6.46958e-07	1.2657
FBgn0020513	ade5	322.514	254.826	0.000643385	1.26562
FBgn0029823	CG3011	88.7878	70.1867	0.00111437	1.26502
FBgn0033100	CG3420	23.227	18.4578	0.0140396	1.25838
FBgn0004047	Yp3	25763.7	20502.8	0.000145107	1.25659
FBgn0031736	CG11030	10.9713	8.77449	0.000773578	1.25037
FBgn0039182	CG5728	6.29886	5.0424	0.0438292	1.24918
FBgn0087002	Rfabg	3545.91	2840.14	1.04349e-05	1.2485
FBgn0010611	Hmgs	15.7287	12.6087	0.0140453	1.24745
FBgn0031417	CG3597	108.397	86.9141	0.00109659	1.24718
FBgn0053113	Rtnl1	291.807	234.034	5.45906e-06	1.24686
FBgn0086674	Tango13	42.7785	34.3447	0.000145107	1.24556
FBgn0263916	Ent2	14.939	11.9958	0.0361143	1.24536
FBgn0027619	Adam	62.8124	50.526	0.000878003	1.24317
FBgn0005278	Sam-S	150.016	120.684	5.53674e-05	1.24304
FBgn0051777	CG31777	72.8705	58.7564	0.0364613	1.24021
FBgn0085823	CR41617	5475.66	4423.54	0.000199612	1.23784
FBgn0033377	Pmm45A	12.3549	9.99437	0.00987133	1.23619
FBgn0038257	smp-30	120.558	97.5636	0.0206077	1.23568
FBgn0039959	CG17514	42.4074	34.3743	0.000331223	1.2337
FBgn0010591	Sply	28.004	22.7037	0.00787313	1.23346
FBgn0010348	Arf79F	201.928	163.724	7.99037e-06	1.23334
FBgn0037810	sle	4.92765	3.99757	0.0453638	1.23266
FBgn0034046	tun	21.4927	17.4486	0.00384087	1.23177
FBgn0003676	T-cp1	15.0046	12.1817	0.0118732	1.23174
FBgn0026259	eIF5B	26.8089	21.7731	0.000190134	1.23129
FBgn0032820	fbp	121.402	98.6917	0.00125908	1.23012
FBgn0031256	CG4164	27.1596	22.0892	0.0125244	1.22955
FBgn0016031	lama	23.465	19.0915	0.00392995	1.22908
FBgn0045866	bai	67.8774	55.2333	0.00446887	1.22892
FBgn0019932	SamDC	34.2383	27.9381	0.0319533	1.22551
FBgn0025574	Pli	28.8638	23.5881	0.000991643	1.22366
FBgn0085768	CR40712	5794.04	4742.89	0.000452148	1.22163
FBgn0036334	CG11267	77.5005	63.4856	0.0414689	1.22076
FBgn0046763	CG17278	22.5498	18.5021	0.0118732	1.21877
FBgn0046214	vig2	48.7909	40.0417	0.00396785	1.2185
FBgn0033728	Cpr49Ae	36.3996	29.8727	0.00973371	1.21849
FBgn0028646	aralar1	70.5386	57.9034	0.000283238	1.21821
FBgn0261642	mbl	130.551	107.373	0.000991643	1.21586
FBgn0085828	CR42195	1818.33	1497.98	0.00154754	1.21386
FBgn0085432	pan	84.2853	69.4803	7.12213e-05	1.21308
FBgn0002526	LanA	9.15149	7.54464	0.00072758	1.21298
FBgn0033918	CG8531	12.8427	10.6047	0.0375035	1.21103
FBgn0004595	pros	87.0285	71.8638	4.75524e-05	1.21102
FBgn0028993	scro	23.4788	19.3995	0.00727521	1.21028
FBgn0085764	CR40668	2107.54	1744.31	0.0308867	1.20824
FBgn0020251	sfl	12.8663	10.6499	0.00545732	1.20812
FBgn0033476	oys	47.4137	39.281	0.000167002	1.20704
FBgn0085737	CR40502	1454.5	1205.46	0.00706675	1.20659
FBgn0004606	zfh1	7.82459	6.49079	0.00561108	1.20549
FBgn0026562	BM-40-SPARC	159.24	132.242	0.00139833	1.20416
FBgn0035771	sec63	39.0147	32.4068	0.000584631	1.20391
FBgn0039464	CG6330	39.5336	32.8603	0.0197002	1.20308
FBgn0004638	drk	37.998	31.5863	0.0067453	1.20299
FBgn0020655	ArfGAP1	17.3282	14.4327	0.025635	1.20062
FBgn0263740	eIF-2gamma	33.8411	28.2271	0.00622489	1.19889
FBgn0085742	CR40546	4202.46	3506.98	0.00976265	1.19831
FBgn0053129	CG33129	82.1029	68.5387	0.00110987	1.19791
FBgn0033101	CG9436	30.2189	25.2324	0.0378942	1.19762
FBgn0085802	CR41548	3101.68	2592.44	0.00425003	1.19643
FBgn0085795	CR41535	2544.03	2132.04	0.0475802	1.19324
FBgn0014141	cher	11.5405	9.67301	0.000521837	1.19306
FBgn0035091	CG3829	46.5952	39.1176	0.00829672	1.19116
FBgn0033010	Atf6	37.4601	31.5006	0.00265534	1.18919
FBgn0034641	mahj	5.75224	4.83769	0.0360238	1.18905
FBgn0035211	CG2211	3.03777	2.55685	0.0421052	1.18809
FBgn0085758	CR40639	1805.98	1520.59	0.0309706	1.18768
FBgn0033375	CG8078	4.43818	3.73727	0.00466114	1.18755
FBgn0015037	Cyp4p1	69.7412	58.777	0.00204028	1.18654
FBgn0003965	v	39.9719	33.6994	0.0355703	1.18613
FBgn0002069	Aats-asp	27.8537	23.4919	0.0282808	1.18567
FBgn0032904	Mtp	56.5689	47.7134	0.0154737	1.1856
FBgn0027556	CG4928	46.9976	39.6436	0.00120645	1.1855
FBgn0032382	Mal-B2	49.3757	41.6941	0.00524574	1.18424
FBgn0025724	beta'Cop	22.0244	18.5991	0.00910378	1.18416
FBgn0016041	Tom40	31.1347	26.3035	0.00291112	1.18367
FBgn0085819	CR41609	5122.51	4331.08	0.0141778	1.18273
FBgn0014002	Pdi	256.15	217.427	0.00110987	1.1781
FBgn0052425	CG32425	97.455	82.7427	0.0166681	1.17781
FBgn0243512	puc	19.0744	16.1949	0.025484	1.1778
FBgn0014388	sty	32.1963	27.3699	0.00178641	1.17634
FBgn0020255	Ran	105.747	89.9923	0.0081098	1.17507
FBgn0036030	CG6767	122.082	104.135	0.00524574	1.17234
FBgn0040227	eIF-3p66	41.669	35.5648	0.0244278	1.17163
FBgn0002031	l(2)37Cc	38.545	32.945	0.0301185	1.16998
FBgn0053120	CG33120	40.4282	34.5736	0.0130968	1.16934
FBgn0031313	CG5080	30.2341	25.9095	0.0359375	1.16691
FBgn0041210	HDAC4	17.317	14.8581	0.00735932	1.16549
FBgn0038662	Mpc1	115.94	99.7703	0.00463276	1.16207
FBgn0036974	eRF1	59.6549	51.3637	0.00727161	1.16142
FBgn0002789	Mp20	132.656	114.223	0.0132332	1.16138
FBgn0033039	Gp210	7.58454	6.53247	0.0359375	1.16105
FBgn0026576	CG5991	100.022	86.4162	0.00844192	1.15745
FBgn0011722	Tig	41.4811	35.8853	0.017372	1.15594
FBgn0085195	CG34166	968.42	840.475	0.032459	1.15223
FBgn0035770	pst	149.986	130.248	0.00642068	1.15154
FBgn0052479	CG32479	13.5929	11.821	0.00628946	1.1499
FBgn0264294	Cyt-b5	228.241	198.611	0.00790681	1.14918
FBgn0263097	Glut4EF	62.0643	54.0391	0.000601255	1.14851
FBgn0026197	noe	4739.6	4130.92	0.00109659	1.14735
FBgn0041194	Prat2	115.089	100.322	0.00834295	1.1472
FBgn0036537	CG18081	47.8682	41.7312	0.0476545	1.14706
FBgn0052687	CG32687	44.055	38.5331	0.0324543	1.1433
FBgn0262125	Sec23	36.1071	31.615	0.0296309	1.14209
FBgn0261988	Gprk2	18.5629	16.2978	0.0116991	1.13898
FBgn0013679	mt:ND1	2193.61	1926.47	0.013289	1.13867
FBgn0003360	sesB	993.748	872.742	0.00135907	1.13865
FBgn0034215	CG4802	40.6904	35.8085	0.0476044	1.13633
FBgn0037728	CG16817	97.4472	85.9673	0.0469458	1.13354
FBgn0260793	2mit	17.0033	15.0316	0.0413737	1.13117
FBgn0033366	Ance-4	48.9231	43.3326	0.0361143	1.12901
FBgn0013686	mt:lrRNA	28533.7	25276.7	0.0116381	1.12885
FBgn0260446	GABA-B-R1	15.1028	13.3801	0.0216066	1.12875
FBgn0031069	Pmp70	42.1177	37.3173	0.0253001	1.12864
FBgn0086677	jeb	31.9622	28.3258	0.0103921	1.12838
FBgn0035538	DopEcR	58.1114	51.5356	0.013289	1.1276
FBgn0023215	Mnt	46.1371	40.9624	0.0118057	1.12633
FBgn0264384	CR43836	2.31624	2.06206	8.76284e-05	1.12326
FBgn0031948	CG7149	22.2383	19.8053	0.0175216	1.12284
FBgn0024183	vig	100.812	89.8051	0.00175966	1.12257
FBgn0262126	gho	23.8611	21.262	0.0352364	1.12224
FBgn0052369	CG32369	12.383	11.0605	0.0363023	1.11956
FBgn0036576	CG5151	18.3691	16.4099	5.49083e-06	1.1194
FBgn0040022	Set1	20.9809	18.8329	0.0356798	1.11406
FBgn0040007	RpL38	699.115	627.572	0.0487796	1.114
FBgn0263987	spoon	46.0044	41.3424	0.0237163	1.11276
FBgn0025726	unc-13	110.978	99.7557	0.00476934	1.1125
FBgn0001145	Gs2	481.085	432.842	0.00781449	1.11146
FBgn0034802	CG3800	227.169	205.167	0.0178747	1.10724
FBgn0039900	Syt7	43.7611	39.5543	0.0282112	1.10636
FBgn0011224	heph	48.9311	44.2838	0.0076433	1.10494
FBgn0031645	CG3036	106.993	96.9526	0.0253875	1.10356
FBgn0000546	EcR	20.0143	18.1408	0.0250635	1.10328
FBgn0036844	Mkp3	19.5045	17.7077	0.0150954	1.10147
FBgn0004652	fru	21.8452	19.8335	0.00375961	1.10143
FBgn0016694	Pdp1	140.966	128.044	0.00689267	1.10092
FBgn0032938	CG8671	17.0301	15.535	0.0206077	1.09625
FBgn0011666	msi	32.2942	29.5046	0.0137426	1.09455
FBgn0016977	spen	41.9119	38.3248	0.00590647	1.0936
FBgn0020306	dom	18.9867	17.4052	0.0343631	1.09086
FBgn0263396	sqd	148.99	137.617	0.00696728	1.08264
FBgn0000409	Cyt-c-p	244.394	225.858	0.0413921	1.08207
FBgn0260400	elav	42.4419	39.3014	0.00199281	1.07991
FBgn0033872	CG6329	112.534	104.581	0.0134582	1.07605
FBgn0028397	Tob	45.2416	42.1668	0.00143624	1.07292
FBgn0027339	jim	88.1249	82.7732	0.0173484	1.06465
FBgn0262656	dm	49.4207	46.6101	0.0270319	1.0603
FBgn0003435	sm	62.0394	58.947	0.00790681	1.05246
FBgn0051451	CR31451	521.465	520.998	0.0261764	1.0009
FBgn0015664	Dref	6.25039	6.98856	0.00376742	0.894375
FBgn0011272	RpL13	562.627	724.535	0.0308867	0.776536
FBgn0260228	CG42502	755.504	986.101	0.0134582	0.766153
FBgn0017581	Lk6	273.278	358.047	0.0252719	0.763247
FBgn0013763	CG5210	269.417	354.303	0.00726199	0.760416
FBgn0011230	poe	17.795	23.4104	0.0237163	0.760131
FBgn0033564	Pex6	4.4026	5.79977	2.31407e-05	0.759099
FBgn0032774	CG17549	236.007	312.275	0.0197002	0.755767
FBgn0028737	Ef1beta	285.466	379.133	0.0306086	0.752946
FBgn0036454	CG17839	40.3091	53.791	0.0216066	0.749365
FBgn0027585	CG8740	17.2495	23.02	0.0355408	0.749326
FBgn0086687	desat1	829.304	1108.77	0.00434429	0.747952
FBgn0029093	cathD	126.16	169.021	0.0205224	0.746418
FBgn0034331	CG15067	313.173	420.477	0.0308867	0.744804
FBgn0261602	RpL8	364.844	491.006	0.012483	0.743054
FBgn0053087	LRP1	11.679	15.7242	0.0206077	0.742742
FBgn0000116	Argk	462.615	623.866	0.0159475	0.74153
FBgn0040606	CG6503	1207.94	1630	0.0415754	0.741068
FBgn0001124	Got1	80.9755	109.276	0.0396232	0.741018
FBgn0040382	CG5273	108.167	146.02	0.00515327	0.74077
FBgn0037705	mura	26.2647	35.5626	0.0189752	0.738549
FBgn0001942	eIF-4a	462.169	627.442	0.00528304	0.736591
FBgn0004404	RpS14b	252.364	342.76	0.00888705	0.736269
FBgn0011754	PhKgamma	32.7459	44.4849	0.0483082	0.736113
FBgn0050035	Tret1-1	88.5489	120.378	0.0208511	0.735588
FBgn0029092	ced-6	56.6397	77.1095	0.0169866	0.734536
FBgn0038349	CG6045	22.8539	31.2598	0.0212979	0.731096
FBgn0020304	drongo	28.2951	38.7117	0.0139002	0.730919
FBgn0015766	Msr-110	413.986	566.863	0.000607141	0.730311
FBgn0032170	CG4658	8.32595	11.4111	0.0473621	0.729634
FBgn0025814	Mgstl	122.064	167.783	0.0155893	0.727513
FBgn0033495	mlt	39.3864	54.1415	0.0121634	0.727471
FBgn0036211	CG5946	101.326	139.439	0.00308221	0.726666
FBgn0086355	Tpi	106.565	146.69	0.0103762	0.726466
FBgn0031689	Cyp28d1	102.273	140.796	0.0235939	0.726395
FBgn0040775	CG12158	522.448	720.266	0.0103314	0.725354
FBgn0021979	l(2)k09913	72.2263	99.6729	0.0109638	0.724634
FBgn0035880	CG17352	60.9711	84.1519	0.0342762	0.724536
FBgn0031381	Npc2a	82.678	114.245	0.0278491	0.723692
FBgn0037643	skap	137.925	190.659	0.00403265	0.723411
FBgn0250848	26-29-p	48.5236	67.077	0.00734598	0.723401
FBgn0028399	TMS1	56.8991	78.7489	0.0271133	0.722538
FBgn0034509	Obp57c	125.286	173.444	0.0207168	0.722341
FBgn0260745	mfas	53.8795	74.6081	0.00156653	0.722167
FBgn0032286	CG7300	28.9251	40.0805	0.0121634	0.721677
FBgn0032285	CG17108	760.524	1056.02	0.00473852	0.720179
FBgn0032494	CG5945	155.944	216.608	0.00883031	0.719935
FBgn0036623	CG4729	62.5922	87.0572	0.00543371	0.718978
FBgn0028473	CG8801	104.531	145.578	0.00139833	0.718041
FBgn0040030	zyd	19.4337	27.0706	0.0216066	0.717888
FBgn0000406	Cyt-b5-r	228.424	318.831	0.00834295	0.716442
FBgn0035710	SP1173	17.5949	24.5589	0.0158833	0.716437
FBgn0039081	Irk2	20.1	28.0902	0.0194432	0.71555
FBgn0035227	CG12090	15.1518	21.181	0.0407861	0.715348
FBgn0038037	Cyp9f2	59.9973	83.9708	0.00190201	0.714502
FBgn0033820	CG4716	1060.91	1489.65	0.000190134	0.712184
FBgn0038149	CG9796	35.9825	50.5351	0.013341	0.712031
FBgn0037074	CG7324	21.5127	30.2154	0.00524421	0.711978
FBgn0028717	Lnk	9.13756	12.8487	0.0413737	0.711168
FBgn0025680	cry	46.9936	66.1016	0.00631686	0.71093
FBgn0033717	CG8839	20.7082	29.204	0.0147158	0.709087
FBgn0043535	Obp57a	52.5389	74.3686	0.0184593	0.706467
FBgn0031971	Sirup	109.381	154.909	0.00296475	0.706098
FBgn0027348	bgm	62.646	88.7946	0.000508032	0.705516
FBgn0261862	whd	66.2272	93.8767	0.000773578	0.705471
FBgn0030317	CG1561	160.651	227.97	0.000283857	0.704703
FBgn0000261	Cat	102.259	145.121	0.000349884	0.704649
FBgn0022768	Pp2C1	6.85051	9.74181	0.0146347	0.703207
FBgn0000206	boss	21.1818	30.1364	0.0405221	0.702864
FBgn0039800	Npc2g	189.962	270.691	0.00264937	0.701766
FBgn0033320	CG8586	52.1776	74.3782	0.00339166	0.701518
FBgn0027611	LM408	101.673	145.033	0.000163179	0.701037
FBgn0053080	CG33080	12.4827	17.8162	0.0167351	0.700641
FBgn0037720	CG8312	10.7719	15.3762	0.0205512	0.700555
FBgn0030773	CG9676	507.08	725.041	2.39872e-05	0.699381
FBgn0011768	Fdh	35.2588	50.4358	0.0019848	0.699083
FBgn0041707	7B2	72.3727	103.648	0.00204028	0.698253
FBgn0085484	CG34455	19.1045	27.4191	0.0433059	0.696757
FBgn0028480	CG17841	114.282	164.048	4.78388e-05	0.696639
FBgn0020236	ATPCL	81.7407	117.383	0.00299667	0.696361
FBgn0037913	fabp	525.78	755.099	0.00324408	0.696306
FBgn0010548	Aldh-III	51.3319	73.761	0.00142319	0.695922
FBgn0030160	CG9691	218.56	314.153	0.00151429	0.695713
FBgn0005614	trpl	279.146	401.443	0.0105513	0.695356
FBgn0026061	Mipp1	15.903	22.916	0.0401583	0.693969
FBgn0010620	Sip1	18.9422	27.3341	0.0459727	0.692987
FBgn0027586	CG5867	108.009	156.004	0.000415423	0.692346
FBgn0050359	Mal-A5	31.6697	45.8478	0.00239768	0.690757
FBgn0003748	Treh	75.0777	108.847	0.000114742	0.689754
FBgn0051769	CG31769	119.435	173.344	0.000127589	0.689004
FBgn0032472	CG9928	498.146	723.303	7.84677e-05	0.68871
FBgn0039483	CG14259	25.3738	36.8982	0.018794	0.687671
FBgn0035228	CG12091	38.3349	55.759	0.00127523	0.687511
FBgn0040732	CG16926	87.8007	127.786	0.00252981	0.687093
FBgn0034474	Obp56g	89.0967	129.726	0.0095027	0.686807
FBgn0030968	CG7322	52.8654	77.2664	0.00524574	0.684196
FBgn0037917	wkd	18.1542	26.5542	0.00848801	0.683668
FBgn0037387	CG1213	57.3682	84.0417	0.000428542	0.682616
FBgn0032076	CG9510	26.3064	38.5958	0.0409382	0.681587
FBgn0262353	CR43051	52.0953	76.5993	0.00239768	0.680102
FBgn0002719	Men	149.741	220.439	0.000150427	0.679284
FBgn0039102	SPE	48.189	70.978	0.00196347	0.678928
FBgn0028487	f-cup	12.2298	18.0238	0.038373	0.678537
FBgn0031449	CG31689	52.6717	77.77	0.000489726	0.677276
FBgn0026428	HDAC6	30.9096	45.7603	8.60774e-05	0.675468
FBgn0041180	Tep4	59.7593	88.474	8.66624e-06	0.675445
FBgn0000459	disco	9.86252	14.6256	0.00528304	0.674331
FBgn0027932	Akap200	62.4432	92.6146	4.00156e-06	0.674226
FBgn0035290	CG1887	36.0548	53.5231	0.00013165	0.67363
FBgn0037090	Est-Q	18.0597	26.8515	0.0111395	0.672576
FBgn0011705	rost	55.3114	82.4663	0.000257798	0.670716
FBgn0041630	Hexo1	11.6762	17.4222	0.032925	0.67019
FBgn0085364	CR34335	1085.77	1621.1	0.00233683	0.669771
FBgn0038105	yellow-f2	22.0341	32.9113	0.00723019	0.669499
FBgn0027550	CG6495	18.3582	27.4401	0.000996404	0.669026
FBgn0038179	CG9312	26.6286	39.8752	0.023719	0.667799
FBgn0029765	CG16756	64.9756	97.4922	0.00811735	0.666469
FBgn0031998	CG8451	10.7454	16.1412	0.0372414	0.665713
FBgn0051075	CG31075	25.9284	38.9983	0.00845296	0.664859
FBgn0034887	St1	18.0942	27.2681	0.0238398	0.663565
FBgn0053523	CG33523	21.936	33.083	0.000251366	0.66306
FBgn0042119	Cpr65Au	126.975	191.542	0.00162963	0.662907
FBgn0038160	CG9759	47.9169	72.503	0.00717127	0.660895
FBgn0032400	CG6770	696.523	1055.87	1.06069e-07	0.659666
FBgn0033978	Cyp6a23	13.7871	20.9183	0.00735932	0.659093
FBgn0034405	Jheh2	43.813	66.5889	2.85835e-05	0.657962
FBgn0028526	CG15293	266.253	404.703	1.21031e-07	0.657898
FBgn0039048	CG17111	10.0173	15.2318	0.00131281	0.657661
FBgn0001112	Gld	6.057	9.2265	0.0235643	0.656479
FBgn0027843	CAH2	32.9641	50.2172	0.000184524	0.656431
FBgn0036428	CG9238	99.2465	151.477	6.25103e-06	0.65519
FBgn0031702	fusl	15.7517	24.0862	0.000907855	0.653972
FBgn0030332	CG9360	14.1726	21.6902	0.0355879	0.653411
FBgn0040349	CG3699	58.1999	89.2537	0.00589752	0.652072
FBgn0038733	CG11407	26.922	41.302	0.000379613	0.651833
FBgn0032422	atilla	47.5172	73.1329	0.00558938	0.649738
FBgn0040600	CG13631	25.818	39.7395	0.0182951	0.649681
FBgn0051217	modSP	12.5707	19.3721	0.00330897	0.648906
FBgn0031635	CG15626	7.26066	11.2002	0.0273375	0.648264
FBgn0039801	Npc2h	49.1847	76.2818	0.00774252	0.644777
FBgn0037347	CG1427	12.0913	18.7798	0.0155893	0.643846
FBgn0263832	Rcd5	7.17176	11.1509	0.0356659	0.643155
FBgn0033799	GLaz	15.0859	23.4878	0.0249897	0.642287
FBgn0035726	CG9953	43.2436	67.6947	0.000206554	0.638803
FBgn0030828	CG5162	26.3759	41.3845	0.00153178	0.637337
FBgn0034479	CG8654	18.2887	28.6962	0.000733755	0.637323
FBgn0051414	CG31414	12.9863	20.3842	0.00820381	0.637078
FBgn0035501	CG1299	14.2761	22.4748	0.000488724	0.635206
FBgn0058469	CR40469	1886.21	2970.24	0.000508032	0.635036
FBgn0034436	CG11961	10.4012	16.3961	0.000448827	0.634369
FBgn0025878	wrapper	7.56161	11.9238	0.0260409	0.63416
FBgn0025827	CG6421	33.9032	53.5404	0.0115574	0.633226
FBgn0033067	CG11211	103.336	163.69	9.79772e-05	0.631287
FBgn0051199	CG31199	31.9167	50.6139	0.00252675	0.630591
FBgn0038422	CG14880	7.27656	11.5411	0.0118732	0.630489
FBgn0030484	GstT4	23.4034	37.1223	0.000733755	0.630442
FBgn0013771	Cyp6a9	13.9641	22.1745	0.000407493	0.629738
FBgn0037788	CG3940	29.4659	46.8088	0.000237904	0.629495
FBgn0032845	CG10747	7.86746	12.5011	0.0363023	0.629343
FBgn0050285	CG30285	23.789	37.8143	0.0407069	0.629101
FBgn0039135	CG13603	21.2474	33.782	0.00268598	0.628957
FBgn0031970	CG7227	9.82177	15.7415	0.00297542	0.623942
FBgn0031515	CG9664	5.52786	8.86422	0.00628946	0.623615
FBgn0031089	CG9572	10.8716	17.501	0.0088413	0.621198
FBgn0051781	CR31781	16.4116	26.4909	0.000218125	0.619519
FBgn0010053	Jheh1	31.3019	50.5508	1.58772e-05	0.619217
FBgn0040260	Ugt36Bc	14.6509	23.6816	0.00325127	0.618659
FBgn0040259	Ugt86Da	17.4522	28.3051	7.05397e-05	0.616574
FBgn0038680	Cyp12a5	8.15649	13.311	0.013289	0.612765
FBgn0262035	CG42846	37.0408	60.4976	0.000202751	0.612269
FBgn0032835	CG16772	82.1429	134.338	0.000145107	0.611465
FBgn0038198	Npc2b	62.7406	102.719	7.52525e-06	0.610797
FBgn0031558	CG16704	67.6196	111.025	0.00694484	0.60905
FBgn0034229	CG4847	135.292	223.153	3.2406e-10	0.606275
FBgn0033437	CG12926	6.75364	11.1476	0.0409382	0.60584
FBgn0038865	CG10824	10.951	18.0909	0.000288161	0.605332
FBgn0030093	dalao	5.02339	8.30731	0.00841392	0.604696
FBgn0035434	Drsl5	85.9427	142.328	0.000138329	0.603837
FBgn0040733	CG15068	626.091	1037.16	7.17935e-09	0.603661
FBgn0025595	AkhR	22.6026	37.5006	3.47528e-05	0.602726
FBgn0085359	CG34330	34.5335	57.3305	0.000415423	0.602359
FBgn0038878	CG3301	20.6629	34.4896	0.000109705	0.599106
FBgn0051205	CG31205	57.7736	96.6593	3.73957e-06	0.597703
FBgn0033981	Cyp6a21	6.1398	10.2774	0.00535887	0.597408
FBgn0043806	CG32032	30.2039	50.8191	7.3982e-06	0.594342
FBgn0019940	Rh6	66.9121	112.639	0.000392781	0.594038
FBgn0036094	CG14153	9.1376	15.3858	0.0361594	0.593898
FBgn0031327	CG5397	11.9892	20.1962	3.17621e-05	0.593636
FBgn0033232	CG12159	13.5792	22.9107	0.00727161	0.592701
FBgn0016013	Faa	8.65065	14.5977	0.0210978	0.592605
FBgn0039678	Obp99a	324.903	548.859	6.1238e-08	0.591962
FBgn0028343	l(1)G0222	4.69611	7.94751	0.00161307	0.590891
FBgn0038610	CG7675	17.8582	30.346	0.00072758	0.588485
FBgn0259715	CG42369	114.394	194.707	1.57615e-10	0.587516
FBgn0022359	Sodh-2	7.70752	13.1256	0.0325788	0.587213
FBgn0032283	CG7296	20.6684	35.3164	0.00165014	0.585234
FBgn0040502	CG8343	775.404	1327.75	1.7544e-14	0.583997
FBgn0036619	Cpr72Ec	71.5401	122.573	1.3686e-08	0.583655
FBgn0036015	CG3088	610.499	1047.65	4.10099e-15	0.582732
FBgn0052523	CG32523	95.2504	163.637	1.0468e-10	0.582084
FBgn0036910	Cyp305a1	8.56508	14.7418	0.00600802	0.581007
FBgn0051102	CG31102	5.39344	9.28812	0.0479522	0.580682
FBgn0263336	CR43417	7.90925	13.6699	0.00388854	0.578588
FBgn0040653	IM4	1205.72	2092.31	8.76491e-10	0.576262
FBgn0030082	HP1b	7.69154	13.3622	0.0235643	0.575619
FBgn0028955	CG8788	37.2708	64.7877	1.18409e-08	0.575276
FBgn0030156	CG15247	3.34472	5.83262	0.0477586	0.57345
FBgn0036022	CG8329	731.299	1285.24	2.82995e-17	0.568997
FBgn0051200	CG31200	30.2385	53.197	6.61623e-06	0.568425
FBgn0040636	CG13255	6.50489	11.4517	0.0331279	0.56803
FBgn0032785	CG10026	13.9374	24.589	0.000471914	0.566816
FBgn0032775	CG17544	4.68047	8.28125	0.00183651	0.565189
FBgn0032213	CG5390	58.8978	104.409	8.95656e-12	0.564109
FBgn0050489	Cyp12d1-p	3.9729	7.05363	0.00768842	0.563241
FBgn0034381	List	6.4731	11.5338	0.0308867	0.56123
FBgn0261534	l(2)34Fc	13.2278	23.6549	0.0134582	0.5592
FBgn0061356	CG18003	24.4247	44.0446	2.31407e-05	0.554545
FBgn0041337	Cyp309a2	9.00166	16.4412	0.000656646	0.547506
FBgn0040718	CG15353	19.636	35.9365	0.0409382	0.546408
FBgn0040211	hgo	12.1044	22.1699	0.0130968	0.545981
FBgn0036106	CG6409	253.164	464.246	1.33678e-17	0.545322
FBgn0053503	Cyp12d1-d	2.80687	5.17058	0.0102594	0.542854
FBgn0032266	CG18302	6.68328	12.3866	5.67166e-05	0.539556
FBgn0259682	Jabba	77.4137	144.84	7.99973e-13	0.534477
FBgn0004629	Cys	202.413	379.607	1.26356e-15	0.533216
FBgn0032282	CG7299	28.8328	54.1254	8.90514e-07	0.532704
FBgn0038820	CG4000	82.9125	155.882	7.42212e-13	0.531892
FBgn0030589	CG9519	7.0626	13.3328	1.68883e-05	0.529715
FBgn0031418	CG3609	36.3723	68.8054	3.87258e-10	0.528626
FBgn0030617	CG9095	1.16696	2.20952	0.0322567	0.52815
FBgn0032613	CG13283	5.48661	10.4008	0.00016092	0.527519
FBgn0039084	CG10175	8.1219	15.4073	1.51548e-07	0.527145
FBgn0038516	CG5840	30.4392	57.754	5.56442e-07	0.52705
FBgn0003067	Pepck	303.272	575.472	7.13366e-14	0.526997
FBgn0015040	Cyp9c1	11.1362	21.166	6.31762e-08	0.526137
FBgn0034438	CG9416	3.19559	6.08258	0.0196603	0.525368
FBgn0031182	Cyp6t1	8.57476	16.5449	2.50213e-06	0.518271
FBgn0051313	CG31313	82.6087	159.523	8.79774e-12	0.517847
FBgn0036992	CG11796	49.7236	96.2743	9.87098e-11	0.516479
FBgn0030895	CG7135	10.9895	21.3391	1.10757e-05	0.514993
FBgn0040099	lectin-28C	72.2804	140.833	1.21316e-16	0.513236
FBgn0067905	IM14	297.116	582.44	1.68977e-06	0.510123
FBgn0034162	CG6426	81.6899	160.517	1.94836e-12	0.508919
FBgn0036589	CG13067	11.0792	22.039	0.00172278	0.50271
FBgn0025454	Cyp6g1	29.6167	59.315	1.29928e-12	0.499312
FBgn0032507	CG9377	7.27245	14.6706	0.000100661	0.495716
FBgn0002565	Lsp2	610.346	1241.4	6.24493e-12	0.491659
FBgn0027584	CG4757	20.6446	43.7368	0.0475802	0.472019
FBgn0040629	CG18673	11.4816	24.4472	9.23545e-07	0.469651
FBgn0037612	CG8112	7.39626	15.854	9.98429e-06	0.466523
FBgn0031432	Cyp309a1	12.6135	27.211	2.20493e-09	0.463545
FBgn0037697	GstZ2	11.9588	26.0264	1.21462e-07	0.459486
FBgn0003189	r	2.79633	6.17	1.41103e-09	0.453214
FBgn0030398	Cpr11B	3.4873	7.74112	0.0462738	0.45049
FBgn0034440	CG10073	1.39417	3.18905	0.00362487	0.437175
FBgn0085256	CG34227	52.8929	123.566	3.18189e-17	0.428055
FBgn0034707	MED16	0.91179	2.14722	0.0115574	0.424637
FBgn0003390	shf	4.86864	11.521	1.98217e-06	0.422587
FBgn0039611	CG14528	16.4216	39.391	6.00123e-20	0.416888
FBgn0034117	CG7997	14.4875	34.8663	1.147e-18	0.415517
FBgn0038738	CG4572	21.1047	50.8769	3.93002e-24	0.414819
FBgn0035583	CG13704	4.75148	11.6217	0.00107053	0.408845
FBgn0033093	CG3270	6.02842	15.3828	5.38756e-09	0.391894
FBgn0052282	Drsl4	15.4017	41.3912	6.41846e-07	0.3721
FBgn0033268	Obp44a	205.241	553.382	1.74933e-51	0.370884
FBgn0043783	CG32444	143.907	395.238	1.07575e-50	0.364103
FBgn0050163	Cpr60D	2.62701	7.31642	0.0474681	0.359057
FBgn0036529	pgant8	0.681194	1.93819	0.00877207	0.351458
FBgn0022355	Tsf1	532.328	1523.9	1.45269e-28	0.349319
FBgn0035255	RabX5	1.57592	4.65689	0.0421196	0.338405
FBgn0036850	Gem2	1.34843	4.04537	0.009999	0.333328
FBgn0039820	CG15554	0.858647	2.65496	0.045326	0.323412
FBgn0028519	CG4500	0.775019	2.90028	8.08577e-05	0.267223
FBgn0034468	Obp56a	5.74679	24.5277	4.49218e-10	0.234298
FBgn0085294	CG34265	2.06259	9.21589	0.000209713	0.223808
FBgn0034480	CG16898	2.58267	11.7764	1.78893e-18	0.219309
FBgn0263458	snoRNA:CG43051-a	4.55521	20.9842	0.00178143	0.217078
FBgn0036880	Cpr76Bc	0.354123	1.91475	0.00524574	0.184944
FBgn0261575	tobi	62.3104	388.734	4.44442e-111	0.160291

## Sheet: 1FN_VFN
Gene	Symbol	Mean FPKM 1FN	Mean FPKM VFN	FDR P-value	Fold Change
FBgn0053192	MtnD	9.73625	0.972877	0.000131104	10.0077
FBgn0038083	CG5999	2.94562	0.734553	3.02664e-05	4.01009
FBgn0085755	CR40611	13.4296	3.43389	3.73354e-25	3.91091		Induced by mating
FBgn0050286	CG30286	2.91776	0.772608	0.00943159	3.7765		Repressed by mating
FBgn0037167	CG11425	15.6103	4.84733	3.63123e-12	3.22039
FBgn0028537	CG31775	28.5266	10.3351	0.000505096	2.76017
FBgn0260954	CG42586	28.5266	10.3351	0.000505096	2.76017
FBgn0034390	CG15093	55.7723	21.4113	7.50434e-29	2.6048
FBgn0031701	TotM	30.3148	11.6453	0.00762286	2.60318
FBgn0032322	CG16743	78.3475	30.9794	4.42972e-26	2.52902
FBgn0085818	CR41608	50.5104	20.5282	7.44444e-20	2.46054
FBgn0037396	CG11459	8.93659	3.69074	0.000177748	2.42135
FBgn0085752	CR40594	46.9147	19.5208	2.64625e-19	2.40332
FBgn0036995	CG5195	10.5481	4.41225	1.72579e-21	2.39065
FBgn0085756	CR40613	23.656	9.92985	2.59513e-16	2.38231
FBgn0085803	CR41550	60.0402	25.9147	6.60375e-18	2.31684
FBgn0044812	TotC	242.746	116.536	5.63677e-08	2.08301
FBgn0020908	Scp1	6.19424	3.00543	0.0188504	2.06101
FBgn0032590	CG4631	4.29093	2.10668	0.000291742	2.03682
FBgn0002562	Lsp1alpha	56.8029	28.3201	0.00543371	2.00575
FBgn0001223	Hsp22	10.8661	5.44259	0.00616558	1.9965
FBgn0024957	Irp-1B	59.7259	30.4586	3.73354e-25	1.96089
FBgn0001258	ImpL3	10.4423	5.44512	0.000459942	1.91773
FBgn0040531	CG11741	21.7664	11.3902	0.00120054	1.91098
FBgn0032638	CG6639	28.9632	15.4064	0.0163675	1.87995
FBgn0085744	CR40561	3.96269	2.13269	2.54245e-05	1.85807
FBgn0013949	Ela	91.0283	49.1881	1.29929e-16	1.85062
FBgn0036622	CG4753	13.6292	7.55756	0.000204704	1.80339
FBgn0046876	Obp83ef	9.59356	5.3677	0.0164328	1.78728
FBgn0030482	CG1673	49.5611	28.5516	1.69295e-11	1.73585
FBgn0039094	CG10184	12.937	7.55815	0.000146624	1.71167
FBgn0030270	CG15199	29.4071	17.3544	0.00214153	1.6945
FBgn0086450	su(r)	30.2724	18.1585	2.31056e-12	1.66712
FBgn0261648	salm	1.82249	1.09751	0.0143943	1.66056
FBgn0034356	CG10924	39.4553	23.8104	4.58422e-09	1.65706
FBgn0030026	sni	10.9272	6.63018	0.00672592	1.6481
FBgn0031801	CG9498	57.0966	34.9973	1.74813e-09	1.63146
FBgn0259238	CG42336	116.745	71.5631	5.85368e-09	1.63136
FBgn0039241	CG11089	48.4155	29.7106	1.87004e-07	1.62957
FBgn0031824	CG9547	13.2175	8.11373	0.000959718	1.62903
FBgn0051324	CG31324	26.8122	16.6005	1.54148e-09	1.61515
FBgn0036997	CG5955	36.466	22.7268	2.71174e-07	1.60454
FBgn0032945	CG8665	32.2935	20.4669	3.56108e-08	1.57784
FBgn0263413	CR43459	2.24227	1.42521	0.00384869	1.57329
FBgn0031044	MKP-4	3.86709	2.45851	0.0417501	1.57294
FBgn0038914	fit	3656.75	2343.48	1.50068e-11	1.56039
FBgn0030612	CG5599	10.8831	7.04594	0.00366331	1.54459
FBgn0027584	CG4757	41.9435	27.1878	0.0407316	1.54273
FBgn0025687	LKR	14.7317	9.56297	2.06668e-06	1.5405
FBgn0034276	CG6385	12.0436	7.89932	6.12403e-05	1.52464
FBgn0038799	CG4288	16.2813	10.7271	0.000115558	1.51777
FBgn0000052	ade2	26.3856	17.3886	1.00125e-06	1.51741
FBgn0026196	nop5	17.7323	11.8149	0.000176826	1.50084
FBgn0001234	Hsromega	205.498	140.017	1.92381e-27	1.46766
FBgn0036876	CG9451	25.8748	17.6497	0.00274178	1.46602
FBgn0037248	Spargel	6.38697	4.37916	0.00123157	1.45849
FBgn0028396	TotA	605.355	415.299	1.14863e-05	1.45764
FBgn0035213	CG2199	7.23185	5.02273	0.0184722	1.43982
FBgn0023540	CG3630	14.5972	10.1536	0.00504465	1.43764
FBgn0035189	CG9119	29.319	20.4344	0.00374975	1.43479
FBgn0005391	Yp2	13501.7	9475.21	9.21773e-10	1.42495
FBgn0051465	CG31465	6.18534	4.34893	7.3199e-06	1.42227
FBgn0000964	tj	7.71022	5.44799	0.00261889	1.41524
FBgn0034140	CG8317	52.2989	37.1941	0.00189351	1.40611
FBgn0013683	mt:ND4L	54.3487	38.6562	0.00239883	1.40595
FBgn0035707	CG8368	7.94744	5.67916	0.0144162	1.3994
FBgn0038256	CG7530	26.2077	18.9059	7.12927e-06	1.38622
FBgn0260971	CG42594	4.71842	3.40895	0.0322468	1.38413
FBgn0264494	CG17646	40.7502	29.4709	1.13281e-05	1.38273
FBgn0032726	CG10621	197.842	143.216	1.04488e-06	1.38143
FBgn0029114	Tollo	3.54525	2.57023	0.0137113	1.37935
FBgn0038662	Mpc1	139.799	101.467	3.85595e-05	1.37778
FBgn0085827	CR41621	2571.34	1866.94	2.79641e-10	1.3773
FBgn0040340	TRAM	55.6029	40.389	1.16177e-05	1.37668
FBgn0030720	CG8939	8.42128	6.12323	0.018334	1.3753
FBgn0032050	CG13096	8.17229	5.96662	0.0297133	1.36967
FBgn0028961	AlstR	3.55929	2.61411	0.0405562	1.36157
FBgn0036254	CG5645	6.75946	4.96665	0.00738309	1.36097
FBgn0260400	elav	43.7809	32.1721	7.3199e-06	1.36083
FBgn0041607	asparagine-synthetase	81.7093	60.2946	0.000173405	1.35517
FBgn0013688	mt:srRNA	128.737	95.3588	0.000841772	1.35003
FBgn0087012	5-HT2	16.3506	12.1198	8.33047e-05	1.34908
FBgn0033741	CG8545	8.79059	6.51878	0.00987617	1.3485
FBgn0020389	Papss	14.7273	10.9674	0.00268058	1.34282
FBgn0022160	Gpo-1	39.2223	29.2778	0.000192474	1.33966
FBgn0030218	CG1628	32.6122	24.3608	0.00918293	1.33871
FBgn0034046	tun	26.7389	20.0255	1.4514e-05	1.33524
FBgn0002780	mod	49.8314	37.4368	1.96696e-05	1.33108
FBgn0019932	SamDC	33.3694	25.1243	0.00504465	1.32817
FBgn0005666	bt	30.0227	22.6747	0.00291739	1.32406
FBgn0051774	fred	6.00728	4.54555	0.000660158	1.32157
FBgn0053307	CG33307	59.088	44.7935	0.00459662	1.31912
FBgn0032404	RpL7-like	26.4166	20.0699	0.0213148	1.31623
FBgn0086906	sls	22.6364	17.2082	0.0240005	1.31544
FBgn0051777	CG31777	91.7601	69.8764	0.0174711	1.31318
FBgn0032820	fbp	138.369	105.401	0.002016	1.31279
FBgn0013684	mt:ND5	468.64	357.073	0.00543371	1.31245
FBgn0004396	CrebA	38.0666	29.0552	0.000301276	1.31015
FBgn0261804	CG42750	11.2727	8.61971	0.00121908	1.30779
FBgn0000053	ade3	33.7668	25.828	0.000253599	1.30737
FBgn0023537	CG17896	79.4027	61.1898	0.000111762	1.29764
FBgn0038299	Spn88Eb	32.0947	24.767	0.00651935	1.29586
FBgn0032198	eEF1delta	159.18	122.861	0.000505096	1.29561
FBgn0025700	CG5885	90.1564	69.5898	0.000483504	1.29554
FBgn0034394	CG15096	174.036	134.361	0.00065342	1.29529
FBgn0039073	CG4408	24.8279	19.171	0.00743461	1.29507
FBgn0035617	l(3)psg2	6.9647	5.38914	0.00718725	1.29236
FBgn0035121	Tudor-SN	48.3291	37.5119	0.00109087	1.28837
FBgn0085779	CR40963	831.731	646.082	0.00434534	1.28735
FBgn0037010	CG4825	36.9384	28.7391	0.00165567	1.2853
FBgn0030607	dob	24.5635	19.1165	0.00572548	1.28494
FBgn0037612	CG8112	22.491	17.5627	0.0391067	1.28061
FBgn0035266	Gk	21.7499	17.0032	0.01414	1.27917
FBgn0003308	ry	11.6704	9.12362	0.0112429	1.27914
FBgn0259937	Nop60B	13.5363	10.6342	0.00988304	1.27291
FBgn0040372	G9a	8.99893	7.09468	0.00761036	1.26841
FBgn0028991	seq	9.71018	7.66619	0.0456238	1.26662
FBgn0032136	Apoltp	77.8001	61.4644	2.15748e-05	1.26577
FBgn0030041	CG12116	134.935	106.658	0.00490791	1.26512
FBgn0265487	mbl	121.81	96.2932	0.0297863	1.26499
FBgn0031645	CG3036	151.891	120.229	0.000204704	1.26335
FBgn0265726	NnaD	6.44946	5.10542	0.0100177	1.26326
FBgn0030425	CG3775	59.746	47.2958	0.00434406	1.26324
FBgn0033661	CG13185	3.41071	2.70345	0.0143943	1.26161
FBgn0032287	CG6415	56.9598	45.3205	0.0147129	1.25682
FBgn0030737	CG9914	156.776	125.157	0.0203005	1.25263
FBgn0086357	Sec61alpha	124.119	99.3688	0.000564568	1.24907
FBgn0026577	CG8677	17.0779	13.6733	0.000751758	1.249
FBgn0029969	CG10932	27.5203	22.0402	0.03613	1.24864
FBgn0000504	dsx	15.3483	12.3129	0.0100948	1.24652
FBgn0033518	Prx2540-2	49.808	39.9589	0.0379866	1.24648
FBgn0014863	Mlp84B	84.9077	68.1728	0.00121908	1.24548
FBgn0036262	CG6910	273.738	219.804	0.00191891	1.24537
FBgn0020513	ade5	294.888	237.737	0.00144182	1.2404
FBgn0026259	eIF5B	25.1026	20.2397	0.00223221	1.24027
FBgn0011016	SsRbeta	85.6825	69.0842	0.00761036	1.24026
FBgn0027835	Dp1	84.1604	67.8769	0.000167091	1.2399
FBgn0264495	gpp	15.5843	12.6626	0.00505141	1.23073
FBgn0031313	CG5080	29.3247	23.8545	0.0181636	1.22931
FBgn0004852	Ac76E	13.8793	11.3002	0.00355664	1.22824
FBgn0000097	aop	13.2587	10.8153	0.00987617	1.22592
FBgn0033366	Ance-4	49.3828	40.288	0.0118955	1.22575
FBgn0036494	Toll-6	6.45185	5.26959	0.0214815	1.22436
FBgn0027339	jim	85.009	69.6271	0.00361463	1.22092
FBgn0263097	Glut4EF	59.2922	48.6011	0.0107386	1.21998
FBgn0020251	sfl	11.3244	9.28313	0.026316	1.21989
FBgn0262656	dm	52.0353	42.7484	0.00582751	1.21724
FBgn0014455	Ahcy13	42.7937	35.2645	0.0417385	1.2135
FBgn0011666	msi	31.5967	26.1298	0.00743103	1.20922
FBgn0004595	pros	80.1576	66.8461	0.00481024	1.19914
FBgn0029766	CG15784	43.0536	35.9243	0.0248342	1.19845
FBgn0031417	CG3597	97.4669	81.364	0.0201938	1.19791
FBgn0027580	CG1516	133.209	111.507	0.00361463	1.19463
FBgn0026197	noe	4237.73	3549.74	0.00318024	1.19381
FBgn0016977	spen	40.2988	33.7582	0.00119302	1.19375
FBgn0085764	CR40668	2304.93	1931.26	0.00930422	1.19348
FBgn0013307	Odc1	38.16	31.9768	0.0346388	1.19336
FBgn0047135	CG32276	284.755	239.308	0.0428756	1.18991
FBgn0085432	pan	77.5306	65.193	0.00421085	1.18925
FBgn0039678	Obp99a	795.187	669.337	0.0142023	1.18802
FBgn0028420	Kr-h1	20.6285	17.3847	0.0230038	1.18659
FBgn0085795	CR41535	2821.3	2383.82	0.0118043	1.18352
FBgn0261988	Gprk2	17.5115	14.7988	0.0232474	1.18331
FBgn0085742	CR40546	4661.32	3945.07	0.00217416	1.18155
FBgn0085758	CR40639	1999.08	1695.23	0.00761036	1.17924
FBgn0085777	CR40959	2153.48	1827.26	0.00625314	1.17853
FBgn0083963	CG34127	8.69091	7.38728	0.0438222	1.17647
FBgn0085413	CG34384	14.1966	12.0752	0.0159268	1.17568
FBgn0040752	Prosap	21.799	18.7	0.0168194	1.16572
FBgn0038535	alt	48.0381	41.2136	0.0225189	1.16559
FBgn0085817	CR41607	2035.39	1748.37	0.0118598	1.16416
FBgn0085819	CR41609	5680.62	4889.19	0.00229581	1.16187
FBgn0085796	CR41539	2360.37	2035.05	0.0198954	1.15986
FBgn0085822	CR41613	1933.43	1667.28	0.0231216	1.15964
FBgn0004045	Yp1	26876.5	23199.5	0.0356708	1.1585
FBgn0085774	CR40779	6979.17	6024.55	0.015297	1.15845
FBgn0003415	skd	15.0359	12.9843	0.0405376	1.15801
FBgn0085761	CR40642	1944.09	1680.05	0.0254435	1.15716
FBgn0001248	Idh	185.601	160.597	0.0236017	1.15569
FBgn0023213	eIF4G	92.2104	79.9059	0.0254435	1.15399
FBgn0085799	CR41544	2230.17	1984.42	0.0438222	1.12384
FBgn0010482	l(2)01289	14.2604	12.689	0.0399266	1.12384
FBgn0015582	dare	3.40346	3.44439	0.031711	0.988117
FBgn0265045	Strn-Mlck	17.2325	17.73	0.000204704	0.971942
FBgn0261836	Msp-300	64.2233	78.8547	0.00196368	0.814451
FBgn0036106	CG6409	419.176	555.943	0.0430729	0.753992
FBgn0032774	CG17549	225.672	299.94	0.0274489	0.75239
FBgn0085364	CR34335	1142.2	1531.92	0.0365926	0.745598
FBgn0030773	CG9676	533.975	727.005	0.0216543	0.734486
FBgn0039151	CG13607	53.6479	73.3375	0.0406923	0.73152
FBgn0010548	Aldh-III	63.297	86.6705	0.00718725	0.730318
FBgn0052523	CG32523	122.37	168.198	0.0422796	0.727537
FBgn0000500	Dsk	64.2767	89.0121	0.0405426	0.722111
FBgn0040775	CG12158	432.311	599.671	0.00268058	0.720914
FBgn0038733	CG11407	28.6107	40.4118	0.00943159	0.707979
FBgn0036619	Cpr72Ec	51.514	72.8602	0.00651935	0.707026
FBgn0052441	CG32441	27.6468	39.1853	0.0365926	0.70554
FBgn0031418	CG3609	38.9584	55.2347	0.00507948	0.705325
FBgn0034229	CG4847	186.205	264.771	0.000290016	0.703268
FBgn0036015	CG3088	649.077	929.898	0.00920656	0.698009
FBgn0262512	Vha14-1	41.8564	60.0968	0.0286521	0.696483
FBgn0038820	CG4000	69.6982	100.133	0.00387129	0.696056
FBgn0032685	CG10211	6.77749	9.74448	0.0284387	0.695521
FBgn0038149	CG9796	35.7868	51.5166	0.0198954	0.694666
FBgn0036428	CG9238	78.3127	112.788	0.00286905	0.694339
FBgn0032297	CG17124	65.4926	94.5297	0.00143772	0.692826
FBgn0043535	Obp57a	56.0475	80.9728	0.021008	0.692176
FBgn0030065	CG12075	5.81104	8.40158	0.0482773	0.69166
FBgn0039114	Lsd-1	114.664	166.595	0.00651935	0.688279
FBgn0033067	CG11211	102.673	149.277	0.0041445	0.687798
FBgn0038198	Npc2b	58.1362	84.5568	0.00318024	0.68754
FBgn0053523	CG33523	22.8514	33.2634	0.00146401	0.686983
FBgn0046247	CG5938	16.303	23.7352	0.0482773	0.68687
FBgn0032536	Ance-3	8.02636	11.6856	0.0406923	0.686857
FBgn0046114	Gclm	59.8247	87.3829	0.0236017	0.684627
FBgn0032286	CG7300	20.8339	30.5677	0.00375777	0.681567
FBgn0250732	gfzf	7.03322	10.3263	0.00162412	0.681096
FBgn0034387	Cyp12b2	22.7028	33.3612	0.0256489	0.680514
FBgn0051205	CG31205	71.2719	104.836	0.00123157	0.679844
FBgn0040502	CG8343	833.001	1228.28	0.00263172	0.678185
FBgn0036022	CG8329	842.793	1253.79	0.000115544	0.672198
FBgn0058469	CR40469	1908.75	2841.24	0.00157937	0.671802
FBgn0025814	Mgstl	148.611	222.736	0.00414361	0.667207
FBgn0031702	fusl	16.2115	24.2989	0.00148069	0.667171
FBgn0264953	Piezo	8.68281	13.047	0.00214153	0.665501
FBgn0037290	CG1124	44.2325	66.8823	0.000825093	0.661348
FBgn0038407	CG6126	31.0063	46.9835	0.000167091	0.659941
FBgn0039529	CG5612	10.2023	15.5145	0.0430729	0.657598
FBgn0035290	CG1887	37.4554	57.0735	6.12403e-05	0.656266
FBgn0036862	Gbs-76A	21.5526	32.9158	0.000245723	0.65478
FBgn0037913	fabp	653.882	999.827	0.000660158	0.653995
FBgn0031327	CG5397	12.7882	19.5585	0.00302848	0.653846
FBgn0030484	GstT4	20.1149	30.778	0.0147129	0.65355
FBgn0034117	CG7997	37.8937	58.1442	0.000559792	0.65172
FBgn0036752	Adgf-A	7.96178	12.2581	0.0139601	0.649514
FBgn0037936	CG6908	15.1056	23.3183	0.00761036	0.647799
FBgn0029898	CG14439	21.3706	33.0118	0.000111762	0.647362
FBgn0038738	CG4572	39.0081	60.2922	0.000204704	0.646984
FBgn0001112	Gld	6.01674	9.31709	0.022156	0.645775
FBgn0029771	CG12730	14.4591	22.5875	0.00842548	0.640137
FBgn0033093	CG3270	9.8671	15.4421	0.0229728	0.638976
FBgn0036992	CG11796	74.6773	118.466	4.01426e-06	0.630367
FBgn0026593	CG5707	40.3763	64.4827	9.52619e-05	0.626157
FBgn0040733	CG15068	462.418	738.599	0.000138434	0.626075
FBgn0032202	CG18619	53.7052	86.1038	0.0138336	0.623726
FBgn0085256	CG34227	84.0053	135.058	0.00172698	0.621993
FBgn0036837	CG18135	97.9746	157.712	2.69072e-06	0.621226
FBgn0035710	SP1173	15.959	25.9351	2.02939e-05	0.615343
FBgn0001257	ImpL2	27.114	44.2082	0.000116028	0.613325
FBgn0051313	CG31313	115.91	190.978	5.6968e-06	0.60693
FBgn0040211	hgo	13.0304	21.7966	0.0107183	0.59782
FBgn0263336	CR43417	13.3042	22.5385	0.00368836	0.590285
FBgn0038214	CG9616	26.2784	44.8537	0.00441209	0.58587
FBgn0029765	CG16756	75.4704	128.885	6.99915e-07	0.585564
FBgn0025827	CG6421	29.8846	51.3284	0.000111762	0.582224
FBgn0053494	CG33494	34.7726	59.9287	0.000174229	0.580233
FBgn0027932	Akap200	53.9554	93.1872	1.71699e-09	0.579001
FBgn0031515	CG9664	6.25176	10.9035	0.00203069	0.573373
FBgn0025595	AkhR	28.3318	50.0239	1.00125e-06	0.566365
FBgn0038381	CG3303	3.73322	6.64308	0.0307467	0.561972
FBgn0030895	CG7135	10.2356	18.4659	0.000111762	0.554297
FBgn0031816	CG16947	5.10526	9.27824	0.00918293	0.55024
FBgn0034162	CG6426	103.852	189.006	3.56108e-08	0.549464
FBgn0031182	Cyp6t1	10.9402	20.0752	1.04233e-05	0.544958
FBgn0039084	CG10175	6.34351	12.004	0.000290016	0.528448
FBgn0031970	CG7227	5.55899	10.6873	0.00123157	0.520151
FBgn0040364	CG11378	11.6682	22.5572	8.3463e-05	0.517273
FBgn0038832	CG15695	3.85891	7.47328	0.000342609	0.516361
FBgn0054039	CG34039	5.05159	9.80484	0.0276105	0.515213
FBgn0052282	Drsl4	38.8329	75.6389	3.19321e-06	0.513398
FBgn0041160	comm2	4.19123	8.17925	0.0145537	0.512423
FBgn0038160	CG9759	16.5249	32.7694	0.00472172	0.504279
FBgn0033268	Obp44a	259.718	520.371	7.49081e-21	0.499102
FBgn0040099	lectin-28C	63.6879	128.534	8.48504e-14	0.495496
FBgn0259682	Jabba	99.0132	204.465	5.19133e-12	0.484254
FBgn0033574	Spn47C	5.87424	12.2333	0.000218601	0.480183
FBgn0003390	shf	6.11859	12.9906	0.000170855	0.471003
FBgn0050033	CG30033	13.2371	29.8456	7.76706e-09	0.44352
FBgn0039685	Obp99b	10.5731	25.5526	2.17814e-05	0.413778
FBgn0040629	CG18673	7.41658	19.3387	1.06196e-06	0.38351
FBgn0039298	to	47.1131	128.334	1.54113e-18	0.367113
FBgn0034480	CG16898	7.4834	20.4122	3.03779e-15	0.366614
FBgn0038484	CG5246	2.46514	7.10967	0.00104995	0.346731
FBgn0030683	CG8239	0.843107	2.59309	0.0142023	0.325135
FBgn0043791	CG8147	8.63396	30.1392	3.74845e-16	0.286469
FBgn0038142	CheA87a	1.24016	4.51834	0.0230038	0.274473

## Sheet: 1FN_1FG
Gene	Symbol	Mean FPKM 1FG	Mean FPKM 1FN	FDR P-Value	Fold change
FBgn0038484	CG5246	0.305701	2.46514	2.83811e-09	8.06389
FBgn0038083	CG5999	0.386401	2.94562	9.38892e-16	7.62322
FBgn0261575	tobi	62.3104	463.848	4.29091e-167	7.44415		Higher 1FN
FBgn0039630	CG11843	0.218494	1.26358	0.0336009	5.78313		Higher 1FG
FBgn0002565	Lsp2	610.346	3375.13	1.4019e-132	5.52986
FBgn0015035	Cyp4e3	10.228	51.4309	3.53144e-61	5.02843
FBgn0028519	CG4500	0.775019	2.99103	1.9e-10	3.85929
FBgn0044810	TotX	3.41414	11.3175	1.11069e-06	3.31489
FBgn0034438	CG9416	3.19559	10.2882	1.397e-37	3.2195
FBgn0044050	Ilp3	14.0633	42.7842	2.29634e-37	3.04225
FBgn0037612	CG8112	7.39626	22.491	2.13091e-24	3.04086
FBgn0034480	CG16898	2.58267	7.4834	1.76591e-12	2.89754
FBgn0020637	Lcp65Ag2	2.56109	7.17358	2.66239e-05	2.80099
FBgn0003067	Pepck	303.272	843.535	1.65859e-51	2.78145
FBgn0034479	CG8654	18.2887	50.7717	3.10998e-45	2.77612
FBgn0002562	Lsp1alpha	20.6784	56.8029	2.74751e-11	2.74697
FBgn0053459	CG33459	2.47869	6.72441	5.09589e-05	2.71289
FBgn0034440	CG10073	1.39417	3.74406	1.628e-10	2.68551
FBgn0031432	Cyp309a1	12.6135	33.5935	1.30679e-33	2.66329
FBgn0043783	CG32444	143.907	377.936	2.59472e-61	2.62625
FBgn0034117	CG7997	14.4875	37.8937	3.59842e-44	2.61561
FBgn0039801	Npc2h	49.1847	127.909	7.68689e-47	2.60059
FBgn0030596	CG12398	0.5252	1.34916	0.0121279	2.56885
FBgn0036995	CG5195	4.16016	10.5481	7.16398e-31	2.53551
FBgn0052282	Drsl4	15.4017	38.8329	4.74485e-11	2.52134
FBgn0039678	Obp99a	324.903	795.187	2.39173e-63	2.44746
FBgn0040732	CG16926	87.8007	202.787	2.5737e-44	2.30962
FBgn0044048	Ilp5	29.3763	67.4891	1.64136e-16	2.2974
FBgn0020638	Lcp65Ag1	0.8492	1.95081	0.0359468	2.29723
FBgn0022355	Tsf1	532.328	1207.67	2.04862e-23	2.26867
FBgn0053926	CG33926	5.99526	13.5414	3.04784e-09	2.25869
FBgn0029648	CG3603	5.90137	13.0383	8.4005e-08	2.20936
FBgn0035583	CG13704	4.75148	10.4492	2.22311e-05	2.19916
FBgn0039298	to	21.6982	47.1131	2.01585e-18	2.17129
FBgn0032834	CG13965	5.58921	11.8561	2.95044e-05	2.12124
FBgn0041337	Cyp309a2	9.00166	18.9817	2.94436e-18	2.10869
FBgn0263458	snoRNA:CG43051-a	4.55521	9.59397	1.29566e-06	2.10616
FBgn0044812	TotC	115.259	242.746	4.93196e-10	2.10609
FBgn0262366	CG43064	2.90037	5.91846	3.39885e-06	2.04058
FBgn0027584	CG4757	20.6446	41.9435	0.00416566	2.03169
FBgn0050431	CG30431	6.3271	12.8524	3.22864e-12	2.03133
FBgn0039611	CG14528	16.4216	33.1962	4.36613e-24	2.02149
FBgn0030270	CG15199	15.1422	29.4071	3.04784e-09	1.94207
FBgn0036850	Gem2	1.34843	2.60561	0.0241483	1.93232
FBgn0038914	fit	1904.58	3656.75	2.10043e-18	1.91998
FBgn0030218	CG1628	17.1199	32.6122	5.63179e-14	1.90493
FBgn0061356	CG18003	24.4247	46.3445	1.9e-10	1.89744
FBgn0029831	CG5966	8.9739	16.9758	3.39732e-05	1.89169
FBgn0032161	CG4594	3.00779	5.65171	0.0108983	1.87902
FBgn0051441	CG31441	1.73506	3.21966	0.0490709	1.85565
FBgn0041711	yellow-e	3.15948	5.84281	5.89502e-06	1.8493
FBgn0038738	CG4572	21.1047	39.0081	2.57994e-20	1.84831
FBgn0036332	CG11261	0.923315	1.70587	0.0318172	1.84755
FBgn0263330	CR43411	14.9899	27.5756	2.21902e-05	1.83962
FBgn0032835	CG16772	82.1429	147.89	1.28074e-13	1.8004
FBgn0030040	CG15347	5.20959	9.32534	0.00129989	1.79003
FBgn0029898	CG14439	12.2734	21.3706	1.1177e-10	1.74121
FBgn0028396	TotA	348.054	605.355	6.11617e-11	1.73926
FBgn0030607	dob	14.2253	24.5635	2.44332e-14	1.72675
FBgn0034356	CG10924	22.9592	39.4553	2.53199e-14	1.71849
FBgn0031703	CG12512	12.6489	21.4339	2.27937e-11	1.69453
FBgn0039800	Npc2g	189.962	321.861	1.33123e-17	1.69435
FBgn0263336	CR43417	7.90925	13.3042	1.87645e-07	1.6821
FBgn0036910	Cyp305a1	8.56508	14.3552	4.02607e-08	1.67601
FBgn0034500	CG11200	13.7462	22.9642	9.57473e-11	1.67058
FBgn0036106	CG6409	253.164	419.176	1.96603e-22	1.65575
FBgn0040531	CG11741	13.1639	21.7664	0.0014783	1.65349
FBgn0031694	Cyp4ac2	14.2782	23.5556	6.96562e-10	1.64976
FBgn0051664	CG31664	3.07596	5.04273	0.00999414	1.6394
FBgn0033093	CG3270	6.02842	9.8671	0.000557901	1.63676
FBgn0004629	Cys	202.413	328.248	5.02076e-17	1.62168
FBgn0085483	CG34454	11.2725	18.203	0.000657249	1.61482
FBgn0024740	Lip2	3.42468	5.49422	0.0164232	1.6043
FBgn0036046	Ilp2	67.7862	108.612	1.79299e-11	1.60227
FBgn0085256	CG34227	52.8929	84.0053	8.39092e-06	1.58821
FBgn0262353	CR43051	52.0953	82.7	1.19522e-10	1.58748
FBgn0030828	CG5162	26.3759	41.8311	2.74661e-08	1.58596
FBgn0002719	Men	149.741	235.534	2.44332e-14	1.57294
FBgn0038147	CCHa2	101.214	158.921	1.33959e-10	1.57016
FBgn0032285	CG17108	760.524	1193.4	1.1197e-12	1.56919
FBgn0001332	L	11.2269	17.4395	4.16845e-09	1.55336
FBgn0037749	CG9471	7.6685	11.9032	0.0174755	1.55222
FBgn0000492	Dr	4.74674	7.31191	0.000606125	1.54041
FBgn0002563	Lsp1beta	865.654	1332.13	3.83809e-05	1.53887
FBgn0033978	Cyp6a23	13.7871	21.125	4.91543e-08	1.53223
FBgn0000459	disco	9.86252	15.0878	2.45706e-09	1.52981
FBgn0032613	CG13283	5.48661	8.38548	0.000964418	1.52835
FBgn0004186	snRNA:U1:95Cb	17.6633	26.9872	0.00553852	1.52787
FBgn0015040	Cyp9c1	11.1362	16.9613	1.18951e-05	1.52308
FBgn0033775	Cyp9h1	10.1578	15.3673	2.66531e-05	1.51286
FBgn0003189	r	2.79633	4.22924	6.07694e-06	1.51242
FBgn0031689	Cyp28d1	102.273	154.298	1.40928e-10	1.50868
FBgn0261808	cu	19.6069	29.5151	1.26779e-08	1.50534
FBgn0033304	Cyp6a13	12.101	18.1853	1.2644e-06	1.5028
FBgn0036992	CG11796	49.7236	74.6773	1.2644e-06	1.50185
FBgn0001223	Hsp22	7.25353	10.8661	0.0426159	1.49805
FBgn0024957	Irp-1B	39.8815	59.7259	1.50611e-11	1.49758
FBgn0030558	CG1461	78.3409	117.077	1.14669e-09	1.49446
FBgn0050355	CG30355	2.07634	3.08263	0.0433171	1.48465
FBgn0004187	snRNA:U1:95Cc	6.98953	10.37	0.046275	1.48365
FBgn0261362	proPO-A1	28.9573	42.5669	6.70693e-06	1.46999
FBgn0027550	CG6495	18.3582	26.9408	2.78578e-08	1.46751
FBgn0003916	snRNA:U1:21D	17.6633	25.8937	0.00780593	1.46597
FBgn0004185	snRNA:U1:95Ca	17.6633	25.8937	0.00780593	1.46597
FBgn0001248	Idh	126.647	185.601	1.80746e-12	1.4655
FBgn0015576	alpha-Est8	41.4497	60.6557	9.30721e-10	1.46336
FBgn0037684	CG8129	8.12289	11.886	0.00486468	1.46327
FBgn0260474	CG30002	17.2871	25.1813	1.68898e-06	1.45665
FBgn0042701	CR12628	8.71426	12.6612	0.00819714	1.45293
FBgn0050489	Cyp12d1-p	3.9729	5.76753	0.0105046	1.45172
FBgn0033101	CG9436	30.2189	43.8267	2.07897e-07	1.45031
FBgn0031464	Duox	1.05805	1.53389	0.0226688	1.44972
FBgn0000592	Est-6	209.21	302.377	1.91521e-09	1.44533
FBgn0032282	CG7299	28.8328	41.5645	5.93234e-05	1.44157
FBgn0032266	CG18302	6.68328	9.61098	0.00292359	1.43806
FBgn0051217	modSP	12.5707	18.0522	1.93238e-05	1.43606
FBgn0003748	Treh	75.0777	107.749	1.52308e-08	1.43517
FBgn0052425	CG32425	97.455	138.915	1.58236e-06	1.42543
FBgn0015570	alpha-Est2	40.256	57.3256	5.80277e-08	1.42403
FBgn0011768	Fdh	35.2588	50.1272	2.29154e-08	1.42169
FBgn0031645	CG3036	106.993	151.891	2.62975e-08	1.41963
FBgn0032785	CG10026	13.9374	19.7325	0.00351975	1.41579
FBgn0053503	Cyp12d1-d	2.80687	3.97247	0.0369097	1.41527
FBgn0039554	CG5003	4.43387	6.27093	0.0106617	1.41432
FBgn0039073	CG4408	17.6801	24.8279	8.18805e-07	1.40429
FBgn0051313	CG31313	82.6087	115.91	1.3562e-05	1.40312
FBgn0032213	CG5390	58.8978	82.5347	5.48183e-09	1.40132
FBgn0000003	7SLRNA:CR32864	1092.43	1529.75	3.55974e-05	1.40032
FBgn0038115	CG7966	34.728	48.6224	1.75493e-06	1.40009
FBgn0261504	7SLRNA:CR42652	1090.06	1524.28	3.86008e-05	1.39835
FBgn0034394	CG15096	125.027	174.036	7.05726e-07	1.39199
FBgn0086676	spin	42.2152	58.7453	1.29566e-06	1.39157
FBgn0032167	CG5853	21.8447	30.3871	5.1609e-05	1.39105
FBgn0027586	CG5867	108.009	149.979	1.04679e-07	1.38858
FBgn0011705	rost	55.3114	76.453	5.29004e-07	1.38223
FBgn0036262	CG6910	198.156	273.738	1.16388e-08	1.38143
FBgn0034229	CG4847	135.292	186.205	3.05009e-08	1.37632
FBgn0014417	CG13397	5.30858	7.30013	0.00535452	1.37516
FBgn0031449	CG31689	52.6717	72.3416	2.62609e-05	1.37344
FBgn0000504	dsx	11.1921	15.3483	1.04828e-05	1.37134
FBgn0053087	LRP1	11.679	16.0085	1.15176e-07	1.37071
FBgn0031092	CG9577	19.9494	27.3118	0.0034937	1.36906
FBgn0015714	Cyp6a17	11.7268	16.0523	0.0019521	1.36885
FBgn0053548	msta	15.791	21.5763	0.00824046	1.36636
FBgn0261862	whd	66.2272	90.3657	1.47895e-07	1.36448
FBgn0037714	CG9396	38.18	52.0764	0.000355901	1.36397
FBgn0037371	Sym	2.78351	3.79212	0.0288802	1.36235
FBgn0034674	CG9304	10.6192	14.4647	0.00118779	1.36213
FBgn0015039	Cyp9b2	52.6469	71.5063	2.12638e-06	1.35822
FBgn0013763	CG5210	269.417	365.324	1.23359e-08	1.35598
FBgn0037548	CG7900	12.6426	17.1375	0.00183877	1.35554
FBgn0053080	CG33080	12.4827	16.883	2.89834e-06	1.35251
FBgn0040606	CG6503	1207.94	1622.59	2.92879e-05	1.34326
FBgn0085360	CG34331	56.043	75.22	0.000215114	1.34218
FBgn0033232	CG12159	13.5792	18.1984	0.0059452	1.34017
FBgn0031305	Iris	98.5723	131.919	1.0149e-06	1.3383
FBgn0028336	l(1)G0255	43.7933	58.6025	1.08585e-05	1.33816
FBgn0035252	CG7970	19.629	26.1971	0.0216882	1.33461
FBgn0038105	yellow-f2	22.0341	29.3539	0.000120368	1.3322
FBgn0025592	Gyk	25.2343	33.5788	4.95803e-05	1.33068
FBgn0023507	CG3835	42.1645	56.0632	1.78208e-05	1.32963
FBgn0029820	CG16721	15.5448	20.6286	0.000185055	1.32705
FBgn0052103	CG32103	28.9561	38.4201	3.49089e-05	1.32684
FBgn0035344	Cyp4d20	20.4015	27.057	0.000606125	1.32623
FBgn0035811	CG12262	92.9435	122.934	2.05698e-06	1.32267
FBgn0031489	CG17224	25.9176	34.2572	0.000714764	1.32177
FBgn0026593	CG5707	30.5629	40.3763	0.000180873	1.32109
FBgn0034436	CG11961	10.4012	13.6944	0.000185055	1.31662
FBgn0032076	CG9510	26.3064	34.607	0.0265684	1.31554
FBgn0033782	sug	20.2595	26.5717	0.0071302	1.31157
FBgn0014000	Hf	59.886	78.522	0.000103676	1.31119
FBgn0052512	CG32512	12.7001	16.6456	0.00905566	1.31067
FBgn0032494	CG5945	155.944	204.39	1.99397e-05	1.31066
FBgn0031801	CG9498	43.6262	57.0966	0.00206967	1.30877
FBgn0052667	CG32667	336.606	440.37	3.49089e-05	1.30827
FBgn0037146	CG7470	132.95	173.913	7.12012e-06	1.3081
FBgn0032726	CG10621	151.379	197.842	1.18951e-05	1.30694
FBgn0003656	sws	32.9642	43.0192	0.000476753	1.30503
FBgn0039152	Rootletin	10.4921	13.6588	0.00509088	1.30182
FBgn0039031	CG17244	77.438	100.795	0.000427552	1.30162
FBgn0041180	Tep4	59.7593	77.7032	3.77047e-06	1.30027
FBgn0031428	CG9886	6.62808	8.60359	0.0339225	1.29805
FBgn0027580	CG1516	102.946	133.209	3.08637e-06	1.29397
FBgn0040321	GNBP3	35.1317	45.4329	0.00131088	1.29322
FBgn0037057	CG10512	24.8119	32.0143	0.00129989	1.29028
FBgn0035791	CG8539	41.9062	53.9109	0.00438993	1.28647
FBgn0040064	yip2	82.309	105.766	0.000512619	1.28499
FBgn0052523	CG32523	95.2504	122.37	0.000793613	1.28472
FBgn0032264	Lip4	12.6284	16.1995	0.0414382	1.28279
FBgn0086687	desat1	829.304	1063.71	4.56511e-06	1.28265
FBgn0010053	Jheh1	31.3019	40.1324	0.00211934	1.28211
FBgn0031936	CG13794	21.2103	27.156	0.000948583	1.28032
FBgn0038878	CG3301	20.6629	26.438	0.0141524	1.27949
FBgn0259682	Jabba	77.4137	99.0132	0.00100877	1.27901
FBgn0038742	Arc42	17.4394	22.288	0.00785652	1.27802
FBgn0046114	Gclm	46.926	59.8247	0.0266751	1.27487
FBgn0033518	Prx2540-2	39.1018	49.808	0.00999414	1.2738
FBgn0010383	Cyp18a1	10.4873	13.3481	0.00947907	1.27279
FBgn0263706	CG43658	9.42682	11.9899	0.00136417	1.27189
FBgn0034162	CG6426	81.6899	103.852	0.00222264	1.27129
FBgn0013307	Odc1	30.0286	38.16	0.000951181	1.27079
FBgn0004404	RpS14b	252.364	320.176	5.47075e-05	1.26871
FBgn0032472	CG9928	498.146	631.866	7.85689e-05	1.26844
FBgn0012034	AcCoAS	206.219	261.372	0.00272082	1.26745
FBgn0035726	CG9953	43.2436	54.7945	0.0239726	1.26711
FBgn0026721	fat-spondin	57.1758	72.4279	0.000797935	1.26676
FBgn0033268	Obp44a	205.241	259.718	0.000115602	1.26543
FBgn0039537	CG5590	23.1144	29.233	0.0165099	1.26471
FBgn0034387	Cyp12b2	17.9796	22.7028	0.0186267	1.2627
FBgn0028473	CG8801	104.531	131.957	3.84612e-05	1.26237
FBgn0036623	CG4729	62.5922	78.9636	0.000207687	1.26156
FBgn0051777	CG31777	72.8705	91.7601	0.00999699	1.25922
FBgn0019830	colt	43.8373	55.1842	0.00364009	1.25884
FBgn0037553	CG18249	12.4573	15.632	0.0387077	1.25485
FBgn0025595	AkhR	22.6026	28.3318	0.0326734	1.25348
FBgn0040305	MTF-1	7.2589	9.09753	0.0450722	1.25329
FBgn0028526	CG15293	266.253	333.689	4.00189e-05	1.25328
FBgn0058160	CG40160	11.8515	14.8465	0.0158232	1.25272
FBgn0036316	CG10960	47.2381	59.1746	0.000317966	1.25269
FBgn0019643	Dat	35.327	44.1732	0.000405765	1.25041
FBgn0000536	eas	69.5467	86.9563	0.000568629	1.25033
FBgn0023537	CG17896	63.5823	79.4027	0.000274622	1.24882
FBgn0035734	CG14823	26.3313	32.8669	0.0242144	1.24821
FBgn0260935	ird1	4.68627	5.84516	0.030227	1.24729
FBgn0000406	Cyt-b5-r	228.424	284.765	0.00388257	1.24665
FBgn0259715	CG42369	114.394	142.588	0.000675201	1.24646
FBgn0034046	tun	21.4927	26.7389	1.85917e-05	1.24409
FBgn0037913	fabp	525.78	653.882	0.00967626	1.24364
FBgn0033466	Pal1	22.4899	27.9546	0.00905815	1.24298
FBgn0038984	CG5315	280.732	348.186	0.00118628	1.24028
FBgn0036732	Oatp74D	13.0658	16.1972	0.00357114	1.23966
FBgn0051778	CG31778	54.4374	67.4183	0.0172846	1.23845
FBgn0032864	CG2493	41.6398	51.5054	0.00319874	1.23693
FBgn0031858	CG17378	11.5565	14.2864	0.00971803	1.23622
FBgn0011280	Obp19d	568.093	702.076	0.00014895	1.23585
FBgn0011272	RpL13	562.627	695.072	0.000185055	1.2354
FBgn0016797	fz2	28.8134	35.5765	0.0014783	1.23472
FBgn0051205	CG31205	57.7736	71.2719	0.0059452	1.23364
FBgn0010548	Aldh-III	51.3319	63.297	0.0100642	1.23309
FBgn0042119	Cpr65Au	126.975	156.534	0.0181931	1.23279
FBgn0039114	Lsd-1	93.0383	114.664	0.00395617	1.23243
FBgn0033820	CG4716	1060.91	1305.68	0.000123978	1.23072
FBgn0033367	proPO45	25.2665	31.0924	0.0131244	1.23058
FBgn0038603	PKD	13.0792	16.0949	0.0149399	1.23057
FBgn0038407	CG6126	25.2001	31.0063	0.00981689	1.23041
FBgn0034405	Jheh2	43.813	53.8917	0.000960386	1.23004
FBgn0040309	Jafrac1	250.068	307.415	0.00101829	1.22933
FBgn0003429	slo	51.3101	62.9859	0.0489975	1.22755
FBgn0038347	CG18522	23.304	28.5721	0.00420196	1.22606
FBgn0000477	DNaseII	45.8086	56.0785	0.00472115	1.22419
FBgn0039697	CG7834	71.7298	87.6607	0.00822782	1.2221
FBgn0031360	CG31937	28.8692	35.231	0.0336009	1.22037
FBgn0013771	Cyp6a9	13.9641	17.0137	0.0381579	1.21839
FBgn0033875	CG6357	94.7542	115.434	0.0228959	1.21825
FBgn0014469	Cyp4e2	56.2115	68.444	0.00404336	1.21762
FBgn0029897	RpL17	325.504	396.298	0.00204863	1.21749
FBgn0025814	Mgstl	122.064	148.611	0.0125429	1.21748
FBgn0051769	CG31769	119.435	145.376	0.00155174	1.2172
FBgn0025574	Pli	28.8638	35.0977	0.0110553	1.21598
FBgn0000556	Ef1alpha48D	3041.48	3696.12	0.000512619	1.21524
FBgn0030160	CG9691	218.56	265.577	0.00472115	1.21512
FBgn0263120	Acsl	194.482	236.227	0.00162376	1.21465
FBgn0037686	RpL34b	325.683	395.578	0.00169675	1.21461
FBgn0015521	RpS21	398.188	483.43	0.000383207	1.21407
FBgn0027843	CAH2	32.9641	40.0091	0.0350758	1.21372
FBgn0039713	RpS8	763.025	925.774	0.00235874	1.21329
FBgn0031459	CG2862	66.2729	80.3234	0.0404323	1.21201
FBgn0087007	bbg	9.22079	11.1736	0.00116295	1.21178
FBgn0029176	Ef1gamma	342.997	415.629	0.00129989	1.21176
FBgn0039151	CG13607	44.3408	53.6479	0.0153985	1.2099
FBgn0037387	CG1213	57.3682	69.3572	0.00704409	1.20898
FBgn0050503	CG30503	88.1375	106.549	0.0414382	1.2089
FBgn0000055	Adh	3132.04	3784.36	0.000998342	1.20828
FBgn0039024	CG4721	33.5784	40.5336	0.0149399	1.20713
FBgn0261593	RpS10b	526.915	635.796	0.0014928	1.20664
FBgn0029785	RpL35	577.026	696.012	0.00266255	1.20621
FBgn0038662	Mpc1	115.94	139.799	0.0148723	1.20579
FBgn0038256	CG7530	21.7409	26.2077	0.0101662	1.20546
FBgn0036825	RpL26	507.787	611.189	0.00131496	1.20363
FBgn0033465	Etf-QO	35.1615	42.2798	0.0131316	1.20244
FBgn0028697	RpL15	681.372	819.307	0.00426377	1.20244
FBgn0020618	Rack1	529.484	636.472	0.00133019	1.20206
FBgn0028955	CG8788	37.2708	44.7549	0.0341429	1.2008
FBgn0011284	RpS4	538.939	646.737	0.00292883	1.20002
FBgn0001168	h	29.3822	35.2567	0.0138456	1.19994
FBgn0039359	RpL27	671.003	804.988	0.00405008	1.19968
FBgn0030521	CtsB1	87.6674	105.16	0.00439557	1.19953
FBgn0002607	RpL19	752.949	902.705	0.00103216	1.19889
FBgn0261602	RpL8	364.844	437.257	0.00381018	1.19848
FBgn0010408	RpS9	465.804	557.85	0.00510005	1.19761
FBgn0003279	RpL4	496.209	593.841	0.00070803	1.19676
FBgn0259111	Ndae1	28.6238	34.2313	0.00780593	1.1959
FBgn0263199	Galk	93.0347	111.259	0.0084713	1.19589
FBgn0020910	RpL3	580.176	690.686	0.00451124	1.19048
FBgn0028940	Cyp28a5	40.8995	48.6778	0.0058481	1.19018
FBgn0004396	CrebA	31.9996	38.0666	0.0491505	1.1896
FBgn0025352	Thiolase	53.6209	63.7006	0.0251291	1.18798
FBgn0028480	CG17841	114.282	135.678	0.00836291	1.18722
FBgn0021979	l(2)k09913	72.2263	85.6461	0.0165311	1.1858
FBgn0003517	sta	551.745	653.637	0.00447993	1.18467
FBgn0261592	RpS6	574.293	680.067	0.00999414	1.18418
FBgn0083956	CG34120	30.4074	35.9937	0.00880509	1.18372
FBgn0030038	CG1440	21.0249	24.8788	0.0492348	1.1833
FBgn0028737	Ef1beta	285.466	337.651	0.0229289	1.18281
FBgn0086710	RpL30	389.38	459.946	0.0128592	1.18123
FBgn0005533	RpS17	528.059	623.73	0.0122191	1.18118
FBgn0030425	CG3775	50.5935	59.746	0.0459262	1.1809
FBgn0038037	Cyp9f2	59.9973	70.752	0.010848	1.17925
FBgn0036821	CG3961	109.054	128.516	0.0198114	1.17846
FBgn0017579	RpL14	546.038	643.397	0.0273892	1.1783
FBgn0034718	wdp	21.2951	25.056	0.0365974	1.17661
FBgn0036213	RpL10Ab	551.108	648.396	0.0108811	1.17653
FBgn0042174	CR18854	92.1381	108.39	0.0329141	1.17638
FBgn0039757	RpS7	746.975	878.239	0.0152367	1.17573
FBgn0030731	Mfe2	29.4282	34.5939	0.0325767	1.17554
FBgn0025366	Ip259	157.991	185.637	0.0105423	1.17499
FBgn0000261	Cat	102.259	120.153	0.0153915	1.17498
FBgn0005593	RpL7	579.963	680.945	0.00799281	1.17412
FBgn0005626	ple	21.8667	25.6681	0.0426454	1.17384
FBgn0025683	CG3164	193.592	227.151	0.00452152	1.17335
FBgn0260441	RpS12	457.376	536.599	0.00999414	1.17321
FBgn0029828	CG6067	89.7026	105.032	0.0215386	1.1709
FBgn0004888	Scsalpha	106.056	124.122	0.0334276	1.17034
FBgn0051523	CG31523	64.1596	74.8914	0.0453929	1.16727
FBgn0053120	CG33120	40.4282	47.1282	0.0446769	1.16573
FBgn0032518	RpL24	344.803	401.492	0.0193097	1.16441
FBgn0002593	RpLP1	1069.43	1244.69	0.0185044	1.16388
FBgn0016917	Stat92E	76.0698	88.3119	0.0324446	1.16093
FBgn0001128	Gpdh	413.762	479.429	0.0414382	1.15871
FBgn0000056	Adhr	9.26215	10.726	0.00104237	1.15805
FBgn0031980	RpL36A	888.7	1028.43	0.0324286	1.15723
FBgn0030616	RpL37a	656.362	759.272	0.00704409	1.15679
FBgn0026372	RpL23A	686.622	793.612	0.0338626	1.15582
FBgn0003941	RpL40	573.409	662.224	0.0218834	1.15489
FBgn0002626	RpL32	463.055	534.424	0.0404441	1.15413
FBgn0010409	RpL18A	661.789	763.598	0.0209722	1.15384
FBgn0027552	CG10863	216.216	249.268	0.0298608	1.15287
FBgn0036022	CG8329	731.299	842.793	0.0198114	1.15246
FBgn0035753	RpL18	426.25	490.327	0.0369097	1.15033
FBgn0261606	RpL27A	682.546	785.021	0.0353495	1.15014
FBgn0064225	RpL5	1065.3	1224.92	0.0289973	1.14984
FBgn0017558	Pdk	63.1901	72.4496	0.0406404	1.14653
FBgn0015288	RpL22	428.242	489.318	0.0457893	1.14262
FBgn0001234	Hsromega	180.354	205.498	0.0398732	1.13941
FBgn0037874	Tctp	493.235	561.909	0.0414382	1.13923
FBgn0037912	sea	47.6905	46.8956	0.0101662	0.983332
FBgn0040513	kappaB-Ras	4.98369	4.36028	0.0356783	0.87491
FBgn0033564	Pex6	4.4026	3.78859	1.9e-10	0.860534
FBgn0036844	Mkp3	19.5045	16.686	0.0291069	0.855493
FBgn0036663	CG9674	74.4135	62.2789	0.0357013	0.83693
FBgn0003360	sesB	993.748	828.019	0.0428774	0.833228
FBgn0035630	CG10576	74.4653	62.0058	0.0459262	0.83268
FBgn0004507	GlyP	125.477	104.254	0.0426454	0.830858
FBgn0051092	LpR2	27.9896	23.2303	0.0243913	0.829963
FBgn0040775	CG12158	522.448	432.311	0.0342238	0.827471
FBgn0013770	Cp1	271.119	224.028	0.0287897	0.826309
FBgn0023213	eIF4G	111.741	92.2104	0.0245088	0.825215
FBgn0260228	CG42502	755.504	621.686	0.0172846	0.822875
FBgn0033250	CG14762	87.513	71.6188	0.00963777	0.818379
FBgn0031629	Clect27	37.1913	30.3563	0.0452629	0.816219
FBgn0035423	CG17737	159.388	129.591	0.0157115	0.813054
FBgn0033194	Vps13	10.372	8.42725	0.0174755	0.8125
FBgn0023083	fray	29.5346	23.9753	0.0425964	0.81177
FBgn0035121	Tudor-SN	59.5779	48.3291	0.0072469	0.811192
FBgn0052190	NUCB1	88.0654	71.3495	0.0290954	0.810188
FBgn0020370	TppII	13.6919	11.0671	0.031893	0.808293
FBgn0034723	CG13506	23.5879	19.0563	0.048763	0.807882
FBgn0037728	CG16817	97.4472	78.4915	0.0113999	0.805477
FBgn0035371	CG9977	20.7574	16.7076	0.0452629	0.804897
FBgn0039208	Esyt2	22.8476	18.3561	0.0340235	0.803413
FBgn0025724	beta'Cop	22.0244	17.6678	0.0462353	0.802192
FBgn0003076	Pgm	130.941	105.029	0.0215197	0.802106
FBgn0031260	Spp	44.0829	35.2893	0.0350078	0.800523
FBgn0000042	Act5C	289.106	231.413	0.0100012	0.800444
FBgn0019925	Surf4	75.3177	60.0764	0.0258534	0.79764
FBgn0030482	CG1673	62.1831	49.5611	0.0196878	0.797019
FBgn0086677	jeb	31.9622	25.4511	0.00922921	0.796286
FBgn0031037	CG14207	84.1128	66.861	0.0100337	0.794896
FBgn0026252	msk	31.7135	25.1251	0.00700381	0.792254
FBgn0029990	CG2233	3355.04	2653.85	0.0295087	0.791003
FBgn0021795	Tapdelta	88.4086	69.9095	0.0328433	0.790755
FBgn0038858	CG5793	83.3978	65.9091	0.00333808	0.790298
FBgn0036381	CG8745	25.8545	20.4202	0.0388335	0.789813
FBgn0031950	Herp	19.5712	15.4569	0.0372628	0.789778
FBgn0005585	Crc	256.804	202.749	0.00286028	0.78951
FBgn0036428	CG9238	99.2465	78.3127	0.00152164	0.789073
FBgn0016041	Tom40	31.1347	24.5324	0.0450722	0.787943
FBgn0261800	LanB1	11.9265	9.38195	0.0350078	0.786645
FBgn0263200	Galt	54.848	43.1305	0.012853	0.786364
FBgn0025700	CG5885	114.673	90.1564	0.00999414	0.786204
FBgn0025678	CaBP1	40.9463	32.1491	0.0144054	0.785153
FBgn0027348	bgm	62.646	49.1766	0.0023138	0.784991
FBgn0000565	Eip71CD	54.2147	42.5514	0.0307861	0.784869
FBgn0004028	wupA	118.772	93.2169	0.000943992	0.784837
FBgn0037935	CG6834	17.1188	13.4326	0.0439637	0.784666
FBgn0005278	Sam-S	150.016	117.709	0.00349602	0.784642
FBgn0034390	CG15093	71.1483	55.7723	0.0352632	0.783888
FBgn0015582	dare	4.34362	3.40346	0.0176511	0.783552
FBgn0005674	Aats-glupro	18.6229	14.5731	0.00688673	0.782535
FBgn0014906	Hydr2	24.5271	19.1646	0.0215015	0.781365
FBgn0032147	IP3K1	3.22964	2.52335	0.0438937	0.781309
FBgn0031971	Sirup	109.381	85.4362	0.0115548	0.781091
FBgn0250839	CG2016	38.2439	29.856	0.00573773	0.780673
FBgn0027095	Manf	48.1505	37.5597	0.0375075	0.780048
FBgn0262125	Sec23	36.1071	28.1154	0.0138379	0.778667
FBgn0030593	CG9512	237.147	184.461	0.00152164	0.777835
FBgn0052280	CG32280	28.5871	22.2021	0.0338626	0.776648
FBgn0025390	Mur2B	11.1236	8.62542	0.0240313	0.775417
FBgn0029823	CG3011	88.7878	68.8392	0.0388718	0.775323
FBgn0038293	CG6904	53.5125	41.4888	0.00115875	0.775309
FBgn0003149	Prm	45.7687	35.4627	0.00999176	0.774825
FBgn0004169	up	163.898	126.931	0.00567826	0.774449
FBgn0034412		14.7099	11.3759	0.046275	0.773349
FBgn0002031	l(2)37Cc	38.545	29.7373	0.00328215	0.771496
FBgn0001296	kar	17.0983	13.1673	0.0295704	0.770096
FBgn0034724	babos	63.3796	48.7806	0.0273805	0.769658
FBgn0027094	Aats-ala	21.0805	16.2156	0.00490269	0.769222
FBgn0035917	Zasp66	122.071	93.8303	0.00162241	0.768656
FBgn0033476	oys	47.4137	36.4411	0.000934944	0.768578
FBgn0028916	CG33090	7.90914	6.07446	0.0325422	0.768031
FBgn0036752	Adgf-A	10.3751	7.96178	0.0324446	0.767393
FBgn0039257	tnc	2.66051	2.03859	0.0438617	0.766239
FBgn0034753	CG2852	140.609	107.662	0.000998342	0.765686
FBgn0031356	CG17660	10.534	8.05994	0.0406619	0.765139
FBgn0262057	Spn77Ba	29.4706	22.5229	0.00835772	0.76425
FBgn0002772	Mlc1	107.988	82.4508	0.000344478	0.763519
FBgn0038294	Mf	403.939	307.767	0.00543045	0.761914
FBgn0031589	CG3714	26.8684	20.4253	0.00351975	0.760199
FBgn0010621	Cct5	19.6266	14.8983	0.0131083	0.759087
FBgn0262801	twr	71.6556	54.3916	0.0153696	0.75907
FBgn0053493	CG33493	61.2167	46.4102	0.0282122	0.75813
FBgn0027088	Aats-gly	15.8448	11.998	0.0311825	0.757219
FBgn0001125	Got2	162.915	123.324	0.00613149	0.756984
FBgn0086347	Myo31DF	7.9482	6.00661	0.046674	0.75572
FBgn0027560	Tps1	203.654	153.529	0.0005156	0.753873
FBgn0014141	cher	11.5405	8.68287	0.000267732	0.752382
FBgn0051793	CG31793	10.2633	7.71173	0.00623435	0.751391
FBgn0030679	CG8206	38.5848	28.9746	0.00496421	0.750934
FBgn0032198	eEF1delta	212.271	159.18	6.81773e-05	0.749891
FBgn0034290	CG5773	202.168	151.529	0.000361575	0.749519
FBgn0026170		86.3483	64.6972	0.00401203	0.749259
FBgn0002868	MtnA	1058.5	791.138	0.000364647	0.747414
FBgn0020255	Ran	105.747	78.5886	8.22069e-05	0.743174
FBgn0000044	Act57B	439.146	325.918	0.000964418	0.742164
FBgn0262169	magu	14.8557	10.9973	0.00206449	0.740277
FBgn0036147	Plod	13.6801	10.1111	0.00567826	0.739108
FBgn0259238	CG42336	157.97	116.745	0.00202754	0.739033
FBgn0261674	CG42709	11.3269	8.37083	0.00418714	0.73902
FBgn0037290	CG1124	59.8572	44.2325	0.00100877	0.738967
FBgn0040733	CG15068	626.091	462.418	0.000354847	0.73858
FBgn0032694	MESR3	14.0157	10.341	0.00555973	0.737813
FBgn0039789	CG9717	9.23481	6.80451	0.0240643	0.736833
FBgn0030926	psh	17.4759	12.8564	0.00969793	0.735665
FBgn0069242	eca	34.8273	25.6098	0.00185851	0.735335
FBgn0031948	CG7149	22.2383	16.3374	0.000476756	0.734653
FBgn0263039	CR43334	2.98265	2.1892	0.00272859	0.733979
FBgn0259680	Pkcdelta	7.0411	5.1658	0.0265681	0.733664
FBgn0037652	CG11980	16.2506	11.9212	0.0373545	0.733586
FBgn0037842	CG6567	6.75827	4.95745	0.0244393	0.733538
FBgn0038795	CG4335	32.0013	23.474	0.012014	0.733531
FBgn0031461	daw	30.6463	22.467	0.000349792	0.733106
FBgn0051547	CG31547	17.0497	12.4929	0.000532658	0.732738
FBgn0027579	CG5508	50.1898	36.7254	0.000514402	0.73173
FBgn0036030	CG6767	122.082	89.2657	0.000488907	0.731197
FBgn0000566	Eip55E	24.169	17.6448	0.00446229	0.73006
FBgn0035162	CG13900	22.1158	16.1168	0.000510914	0.728746
FBgn0037137	Nopp140	14.7064	10.7078	0.00999414	0.728107
FBgn0020439	fau	162.326	118.065	2.17866e-05	0.727331
FBgn0005391	Yp2	18574.5	13501.7	2.62609e-05	0.726894
FBgn0002780	mod	68.5938	49.8314	2.12649e-05	0.726471
FBgn0035087	CG2765	38.7222	28.1248	5.1609e-05	0.726323
FBgn0013984	InR	8.76645	6.35203	0.000719871	0.724584
FBgn0020385	pug	92.3389	66.8902	0.000835949	0.7244
FBgn0013673	mt:ATPase8	318.676	230.692	0.0242144	0.723907
FBgn0040237	bor	9.41254	6.81128	0.00990068	0.723639
FBgn0039464	CG6330	39.5336	28.5688	0.001497	0.722647
FBgn0039930	CG11077	22.0533	15.9051	0.0421419	0.721211
FBgn0031049	Sec61gamma	97.0903	69.9412	5.24175e-05	0.720372
FBgn0032286	CG7300	28.9251	20.8339	0.000199294	0.720271
FBgn0030041	CG12116	187.378	134.935	0.000108029	0.720119
FBgn0036619	Cpr72Ec	71.5401	51.514	0.00015871	0.720071
FBgn0038774	CG5023	43.3889	31.2171	0.00715351	0.719471
FBgn0014455	Ahcy13	59.6134	42.7937	5.1609e-05	0.717853
FBgn0011824	CG4038	20.3165	14.5841	0.0255393	0.717846
FBgn0250820	CG5802	23.4009	16.7961	0.00415585	0.717757
FBgn0032652	CG6870	103.419	74.096	0.000391018	0.716464
FBgn0264384	CR43836	2.31624	1.6565	5.62233e-08	0.715169
FBgn0259733	tal-AA	21.3541	15.2644	0.00276063	0.714824
FBgn0025620	CG13360	65.8658	46.9968	2.19386e-05	0.713524
FBgn0030060	CG2004	20.152	14.356	0.00206449	0.712385
FBgn0039864	CG11550	28.2303	20.104	0.0149399	0.712142
FBgn0040985	CG6115	132.985	94.6033	3.21907e-06	0.711385
FBgn0085453	CG34424	28.8095	20.4808	0.00348466	0.710906
FBgn0002638	Rcc1	7.89174	5.59648	0.018831	0.709157
FBgn0015522	olf186-M	13.9625	9.89392	0.00834891	0.708607
FBgn0027086	Aats-ile	19.521	13.7653	2.6667e-05	0.705153
FBgn0038146	CG9799	5.48649	3.85304	0.0376108	0.702278
FBgn0003137	Ppn	58.1715	40.821	3.62121e-06	0.701735
FBgn0039099	CG10157	35.1746	24.6112	0.00566148	0.699687
FBgn0033188	Drat	45.3522	31.7062	1.57611e-06	0.699109
FBgn0004654	Pgd	45.459	31.7755	0.00176314	0.698992
FBgn0264294	Cyt-b5	228.241	159.509	4.95778e-08	0.698865
FBgn0086357	Sec61alpha	177.981	124.119	9.39111e-08	0.697372
FBgn0050033	CG30033	18.9881	13.2371	0.00491879	0.697128
FBgn0031913	CG5958	107.096	74.657	0.000124137	0.697102
FBgn0034943	Fmo-1	7.8332	5.46037	0.030045	0.697081
FBgn0039562	Gp93	80.2342	55.9099	2.62975e-08	0.696834
FBgn0031993		12.4837	8.68281	2.70441e-05	0.69553
FBgn0038257	smp-30	120.558	83.7049	0.001079	0.694313
FBgn0035909	ergic53	67.7763	46.9855	5.75227e-07	0.693243
FBgn0040736	IM3	718.229	496.502	0.00188638	0.691287
FBgn0010638	Sec61beta	131.365	90.7805	5.43381e-07	0.691054
FBgn0262569	CG43109	2.37772	1.64209	2.05571e-05	0.690617
FBgn0261786	mi	3.536	2.44186	0.00215593	0.690571
FBgn0032685	CG10211	9.83946	6.77749	8.97636e-05	0.688807
FBgn0025682	scf	40.1382	27.6156	2.14928e-05	0.688013
FBgn0011016	SsRbeta	124.739	85.6825	1.29641e-06	0.686892
FBgn0026879	CG13364	63.4243	43.3975	0.00188477	0.684242
FBgn0025336	CG4882	10.4798	7.15315	0.0340235	0.682567
FBgn0003118	pnt	5.66217	3.86466	0.00835158	0.682541
FBgn0000052	ade2	38.6837	26.3856	1.94158e-06	0.682086
FBgn0051915	CG31915	7.37357	5.02292	0.012966	0.681205
FBgn0000053	ade3	49.5936	33.7668	2.30122e-06	0.680869
FBgn0036191	Sug	5.4829	3.73248	0.0426454	0.680748
FBgn0039238	CG7016	21.2264	14.4305	0.000743929	0.679836
FBgn0259937	Nop60B	19.9401	13.5363	0.00256157	0.67885
FBgn0001218	Hsc70-3	306.516	207.877	3.1057e-11	0.678192
FBgn0003162	Pu	76.7671	51.998	4.02338e-08	0.677347
FBgn0037447	Neurochondrin	9.1563	6.19372	0.00938272	0.676444
FBgn0028646	aralar1	70.5386	47.6831	5.73266e-07	0.675986
FBgn0026077	Gasp	13.4906	9.10078	0.00404336	0.674602
FBgn0036124	CG7839	8.09667	5.45263	0.00188477	0.673441
FBgn0250824	CG33655	32.2589	21.7218	2.61194e-07	0.67336
FBgn0032116	Mco1	4.41619	2.97194	0.00667623	0.672963
FBgn0033593	Listericin	88.4974	59.533	0.000738465	0.672709
FBgn0263321	CG43402	88.4463	59.2786	5.47075e-05	0.670222
FBgn0010470	Fkbp13	68.5259	45.9104	2.71189e-07	0.669972
FBgn0263260	sel	32.3351	21.6456	0.000106109	0.669417
FBgn0053123	CG33123	11.9179	7.93795	9.83889e-06	0.666053
FBgn0034761	CG4250	214.067	142.351	1.56321e-09	0.664981
FBgn0038832	CG15695	5.81146	3.85891	0.00683275	0.664016
FBgn0036337	CG11255	59.0975	39.2173	8.85056e-08	0.663602
FBgn0032136	Apoltp	117.41	77.8001	4.35323e-11	0.662634
FBgn0003062	Fib	19.5059	12.897	0.00118726	0.661185
FBgn0015037	Cyp4p1	69.7412	46.0721	1.33024e-07	0.660616
FBgn0037930	CG14715	38.8488	25.6328	0.000996122	0.659809
FBgn0029799	CG15772	13.584	8.95284	0.00990841	0.659071
FBgn0002773	Mlc2	214.97	141.659	3.82143e-11	0.658972
FBgn0045038	Proct	23.6896	15.6085	5.1609e-05	0.658873
FBgn0030481	CG1662	16.5294	10.8881	0.00162376	0.658709
FBgn0039175	CG5706	9.26416	6.09774	0.00202754	0.658207
FBgn0052549	CG32549	71.8504	47.225	2.07618e-06	0.657268
FBgn0002526	LanA	9.15149	6.00973	4.76258e-09	0.656694
FBgn0026562	BM-40-SPARC	159.24	104.389	2.12705e-07	0.655541
FBgn0053138	AGBE	39.9396	26.1617	7.10668e-08	0.655033
FBgn0017561	Ork1	10.8496	7.09672	5.19509e-05	0.654101
FBgn0040735	CG16836	303.083	197.298	9.80643e-09	0.65097
FBgn0043364	cbt	49.4099	32.1509	3.79871e-10	0.650698
FBgn0030801	Rcp	3.84996	2.50489	0.0329141	0.650628
FBgn0000046	Act87E	33.1535	21.5673	2.16425e-05	0.650528
FBgn0027556	CG4928	46.9976	30.5725	7.98829e-12	0.650511
FBgn0263083	CG43351	205.694	133.589	7.7415e-06	0.649458
FBgn0037936	CG6908	23.2782	15.1056	0.000106109	0.648917
FBgn0033128	Tsp42Eg	9.86913	6.38041	0.0227473	0.646501
FBgn0040629	CG18673	11.4816	7.41658	0.030045	0.645951
FBgn0036770	Prestin	10.2619	6.6159	2.03627e-06	0.644705
FBgn0037370	CG1236	11.0886	7.14166	0.00753322	0.644055
FBgn0032382	Mal-B2	49.3757	31.763	6.42574e-11	0.643292
FBgn0014865	Mtk	766.464	491.009	0.0280428	0.640616
FBgn0013949	Ela	142.286	91.0283	1.84337e-08	0.639754
FBgn0042201	Nplp3	1027.82	657.363	1.31689e-10	0.639568
FBgn0014388	sty	32.1963	20.5661	4.83293e-12	0.638771
FBgn0030262	Vago	44.325	28.3029	0.0011678	0.63853
FBgn0260388	CG42514	26.231	16.7453	6.38638e-08	0.638377
FBgn0023540	CG3630	22.8917	14.5972	1.53042e-05	0.637663
FBgn0025583	IM2	655.15	417.309	1.2226e-05	0.636967
FBgn0050151	CG30151	31.4034	19.9392	3.38257e-06	0.634937
FBgn0038467	CG3590	24.2653	15.404	2.15895e-07	0.634818
FBgn0030576	CG15890	6.23107	3.95126	0.00181792	0.634123
FBgn0031256	CG4164	27.1596	17.1431	4.75873e-07	0.631199
FBgn0023529	CG2918	77.7274	49.0167	2.2734e-13	0.630623
FBgn0037140	CG7442	5.4432	3.42966	0.00610137	0.630082
FBgn0035982	CG4461	47.2202	29.674	4.02338e-08	0.628418
FBgn0063923	Kaz1-ORFB	27.7048	17.2639	0.000454111	0.623139
FBgn0031389	CG4259	17.6226	10.955	0.000353539	0.621645
FBgn0037718	P58IPK	32.4637	20.0058	2.83862e-10	0.61625
FBgn0041194	Prat2	115.089	70.534	1.66086e-10	0.612867
FBgn0029128	tyn	2.03308	1.23003	0.0494898	0.60501
FBgn0015393	hoip	25.6408	15.4502	0.000968256	0.602563
FBgn0262510	CR43080	18.6369	11.2079	6.81773e-05	0.601384
FBgn0035189	CG9119	49.0169	29.319	2.71981e-05	0.598141
FBgn0000078	Amy-d	12.8014	7.60354	0.0398732	0.593962
FBgn0041160	comm2	7.05651	4.19123	0.00388257	0.593953
FBgn0031942	CG7203	45.64	26.9693	1.68583e-08	0.590913
FBgn0004638	drk	37.998	22.2489	1.73197e-11	0.58553
FBgn0034618	CG9485	25.7356	14.8287	6.19233e-14	0.576194
FBgn0036547	CG17032	47.92	27.4925	1.94008e-09	0.573717
FBgn0259977	Tdc1	4.08627	2.34246	0.00108631	0.573251
FBgn0083984	CG34148	13.4581	7.64215	0.00193999	0.567847
FBgn0014380	RhoL	9.49207	5.38437	0.000164989	0.567249
FBgn0031970	CG7227	9.82177	5.55899	2.66531e-05	0.565987
FBgn0019952	Orct	14.3149	8.01595	4.84145e-07	0.559971
FBgn0023535	arg	5.31599	2.96066	0.0389895	0.556935
FBgn0011296	l(2)efl	50.276	27.9972	3.20132e-09	0.55687
FBgn0046878	Obp83cd	16.3252	9.07186	0.000263751	0.555697
FBgn0028360	l(1)G0148	15.5448	8.60554	7.1758e-14	0.553596
FBgn0262531	CG43085	16.516	9.10403	0.000334671	0.551225
FBgn0032482	Pect	89.2059	49.0467	1.39203e-13	0.549815
FBgn0028540	CG9008	12.0327	6.6005	1.4749e-07	0.548545
FBgn0038074	CG6188	35.9611	19.7108	0.0161041	0.548114
FBgn0053092	P5CDh2	11.756	6.42923	3.66149e-10	0.546891
FBgn0043791	CG8147	15.9871	8.63396	1.2226e-05	0.540057
FBgn0013348	TpnC41C	18.8883	10.1134	0.000117593	0.535429
FBgn0005655	mus209	3.74621	1.96276	0.0059452	0.523931
FBgn0037396	CG11459	17.0669	8.93659	2.92609e-08	0.523622
FBgn0259229	CG42329	5.18265	2.66662	2.07618e-06	0.514528
FBgn0001142	Gs1	75.4514	38.5218	1.1106e-23	0.510551
FBgn0002931	net	3.44717	1.71457	0.00141987	0.497386
FBgn0032773	fon	182.484	90.192	5.46752e-23	0.494246
FBgn0052194	CR32194	2.3323	1.14246	3.83008e-06	0.489842
FBgn0011704	RnrS	6.20329	3.0373	1.25472e-05	0.489627
FBgn0004107	cdc2c	3.26995	1.58919	0.0297379	0.485997
FBgn0243513	cnir	3.66568	1.76621	0.0240313	0.481824
FBgn0011722	Tig	41.4811	19.8193	7.24473e-27	0.477792
FBgn0037835	CG14687	75.6465	35.6433	5.61399e-25	0.471182
FBgn0083015	snoRNA:Psi18S-920	19.27	9.06914	0.0465183	0.470634
FBgn0001257	ImpL2	58.2646	27.114	6.38801e-29	0.46536
FBgn0031865	Nha1	7.17964	3.31866	1.87924e-10	0.462231
FBgn0039849	CG11334	20.7683	9.38413	1.05412e-15	0.451848
FBgn0039094	CG10184	28.6562	12.937	1.67517e-11	0.451457
FBgn0036876	CG9451	57.6846	25.8748	3.20224e-15	0.448557
FBgn0039241	CG11089	108.46	48.4155	3.18137e-24	0.446391
FBgn0003965	v	39.9719	17.8216	5.04066e-20	0.445853
FBgn0028855	CG15282	27.5979	12.1385	4.13335e-08	0.439835
FBgn0046876	Obp83ef	22.0266	9.59356	1.48984e-09	0.435545
FBgn0039629	CG11842	13.3557	5.80959	2.48466e-09	0.434988
FBgn0000079	Amy-p	12.1043	5.13031	0.00645731	0.423844
FBgn0037167	CG11425	36.8456	15.6103	1.17967e-17	0.423668
FBgn0044011	Spn43Ad	2.22915	0.94043	0.0204619	0.421878
FBgn0085282	CG34253	28.1134	11.601	3.65234e-07	0.412652
FBgn0037635	CG9837	39.7399	16.1706	6.37023e-20	0.406912
FBgn0054003	NimB3	8.96217	3.57727	0.00715351	0.399152
FBgn0010222	Nmdmc	72.9063	29.084	3.26244e-12	0.398923
FBgn0004240	Dpt	180.966	70.328	2.43496e-06	0.388625
FBgn0000047	Act88F	1.52532	0.591238	0.0100667	0.387615
FBgn0035348	CG16758	304.164	115.405	6.45036e-43	0.379418
FBgn0030073	CG10962	38.982	14.7449	2.24627e-10	0.378248
FBgn0026403	Ndg	18.5553	6.99312	4.2565e-37	0.37688
FBgn0260479	CG31904	1.57548	0.574078	2.91607e-05	0.364382
FBgn0250822	CG34222	4.17741	1.50764	0.00137027	0.360904
FBgn0002528	LanB2	20.1723	7.25117	5.71872e-50	0.359462
FBgn0037801	CG3999	25.725	9.1522	2.87495e-25	0.35577
FBgn0034407	DptB	286.194	100.705	1.63015e-11	0.351877
FBgn0038160	CG9759	47.9169	16.5249	5.85809e-17	0.344866
FBgn0035969	CG4476	1.75065	0.592488	0.00468119	0.33844
FBgn0027929	NimB1	5.10848	1.57883	0.000102528	0.30906
FBgn0014454	Acp1	4.45928	1.37645	3.92798e-09	0.308671
FBgn0039564	CG5527	11.5111	3.53807	7.43752e-28	0.307363
FBgn0260954	CG42586	95.9581	28.5266	3.12243e-08	0.297281
FBgn0028537	CG31775	95.9581	28.5266	3.03702e-08	0.297281
FBgn0040993	CG17325	256.062	67.8795	1.57297e-100	0.26509
FBgn0263402	CG43448	5.24693	1.30281	0.00231469	0.2483
FBgn0031805	CG9505	19.1581	3.97203	3.53144e-61	0.20733
FBgn0040609	CG3348	39.9607	8.0569	2.25677e-20	0.201621
FBgn0033830	CG10814	7.68071	1.52532	3.00656e-05	0.198591
FBgn0039239	CG13641	19.0833	3.71941	5.10733e-23	0.194903

## Sheet: 1MG_VBer
Gene	Symbol	Mean FPKM 1MG	Mean FPKM Vber	FDR P-value	Fold change
FBgn0260954	CG42586	223.569	14.522	0.0143555	15.3953
FBgn0028537	CG31775	223.569	14.522	0.0149094	15.3953
FBgn0037167	CG11425	66.4491	11.3023	3.85168e-08	5.87925		Induced by mating
FBgn0005655	mus209	5.97628	1.19111	0.486309	5.01739		Repressed by mating
FBgn0039239	CG13641	40.0898	8.09813	1	4.9505
FBgn0037396	CG11459	43.8431	10.4935	0.00492518	4.17811
FBgn0023535	arg	16.7676	4.14041	0.522343	4.04975
FBgn0040609	CG3348	139.79	35.4123	6.7473e-05	3.9475
FBgn0051465	CG31465	25.2944	6.52788	0.137487	3.87483
FBgn0014865	Mtk	4475.29	1187.89	1	3.76743
FBgn0053092	P5CDh2	34.3085	9.13408	5.86474e-05	3.7561
FBgn0034407	DptB	1315.24	401.088	0.775332	3.27918
FBgn0010385	Def	13.9439	4.27429	1	3.26226
FBgn0033890	Ctf4	1.58153	0.490696	0.0781327	3.22303
FBgn0000047	Act88F	5.18992	1.61998	0.931074	3.20368
FBgn0010052	Jhe	2.567	0.806227	1	3.18396
FBgn0004240	Dpt	811.908	265.368	0.237601	3.05956
FBgn0010388	Dro	1026.1	354.901	1	2.89124
FBgn0044812	TotC	189.433	65.8305	0.294038	2.87759
FBgn0043578	PGRP-SB1	661.509	232.197	1	2.84891
FBgn0046876	Obp83ef	27.9106	9.98769	1	2.7945
FBgn0035806	PGRP-SD	87.0593	32.1079	1	2.71146
FBgn0036749	CG7460	4.60086	1.69952	0.870297	2.70716
FBgn0038074	CG6188	115.815	44.7247	1	2.58952
FBgn0262569	CG43109	5.31699	2.08648	1	2.5483
FBgn0260455	CG10332	294.495	115.942	0.917481	2.54002
FBgn0033949	CG10131	15.6049	6.1947	1	2.51908
FBgn0041579	AttC	739.407	299.049	0.454451	2.47253
FBgn0041607	asparagine-synthetase	91.9676	37.4161	7.94818e-08	2.45797
FBgn0019952	Orct	24.91	10.1413	0.0149094	2.45628
FBgn0034010	CG8157	26.8047	11.1746	1	2.39872
FBgn0000279	CecC	41.0899	17.2512	1	2.38186
FBgn0046878	Obp83cd	16.0991	6.76708	1	2.37904
FBgn0039849	CG11334	22.2405	9.36875	0.00865158	2.3739
FBgn0033830	CG10814	11.9066	5.1297	0.00188633	2.32111
FBgn0039685	Obp99b	35.0614	15.108	1	2.32072
FBgn0085320	CG34291	25.5257	11.2468	1	2.2696
FBgn0035948	CG5644	6.37642	2.82377	1	2.25812
FBgn0039241	CG11089	145.037	64.3524	0.00220243	2.25379
FBgn0036622	CG4753	22.0159	9.7957	1	2.2475
FBgn0002528	LanB2	24.838	11.0617	0.000877293	2.24541
FBgn0000052	ade2	58.0755	25.9326	0.00123775	2.23948
FBgn0039564	CG5527	14.5364	6.53143	0.430624	2.22561
FBgn0083984	CG34148	22.5474	10.2085	0.336291	2.2087
FBgn0028396	TotA	526.615	239.21	0.275358	2.20147
FBgn0038467	CG3590	30.1911	13.9848	0.249328	2.15886
FBgn0040582	CG5791	261.903	121.748	0.275009	2.15119
FBgn0052185	edin	48.3653	22.7232	0.759614	2.12845
FBgn0031824	CG9547	20.203	9.49525	0.25451	2.1277
FBgn0022160	Gpo-1	64.8085	30.6585	0.0150935	2.11388
FBgn0010222	Nmdmc	124.877	59.1161	2.55977e-08	2.1124
FBgn0086365	Orct2	4.40618	2.0937	0.594637	2.1045
FBgn0026403	Ndg	22.5133	10.6979	1	2.10447
FBgn0031805	CG9505	17.9293	8.5657	0.316146	2.09316
FBgn0013949	Ela	153.869	74.4237	1	2.06747
FBgn0032322	CG16743	98.9818	47.9116	1	2.06593
FBgn0040340	TRAM	70.2436	34.7529	0.00123775	2.02123
FBgn0032773	fon	286.424	145.661	1	1.96637
FBgn0037635	CG9837	53.3147	27.131	1	1.96509
FBgn0014455	Ahcy13	86.6733	44.3067	0.822196	1.95621
FBgn0261989	CG42807	29.7484	15.2275	0.843631	1.9536
FBgn0085192	CG34163	16.4314	8.42776	0.729642	1.94968
FBgn0037801	CG3999	24.6591	12.6836	1	1.94418
FBgn0035911	CG6638	18.1093	9.34923	1	1.93698
FBgn0023530	CG3740	17.323	8.97422	1	1.9303
FBgn0035722	CG10075	12.2107	6.338	1	1.92659
FBgn0039311	CG10513	14.2346	7.43134	0.416311	1.91549
FBgn0023549	Mct1	14.7751	7.76695	0.619718	1.90231
FBgn0035189	CG9119	56.9929	30.0546	0.949526	1.89631
FBgn0032262	CG7384	10.2408	5.40276	1	1.89548
FBgn0015393	hoip	27.0421	14.3646	0.327583	1.88255
FBgn0030482	CG1673	66.399	35.2809	0.16047	1.88201
FBgn0034741	CG4269	31.3471	16.8203	1	1.86365
FBgn0030262	Vago	123.663	66.683	0.336291	1.8545
FBgn0034390	CG15093	84.318	45.6881	1	1.84551
FBgn0031801	CG9498	69.3447	37.6081	0.60059	1.84388
FBgn0034858	eIF2B-delta	12.8738	7.00243	1	1.83848
FBgn0032945	CG8665	25.3056	13.7707	0.752591	1.83763
FBgn0037906	PGRP-LB	18.0884	9.92276	1	1.82292
FBgn0026872	CG14777	33.4627	18.3617	0.762603	1.82242
FBgn0020389	Papss	14.3378	7.92975	0.768847	1.8081
FBgn0034046	tun	33.405	18.4929	0.759614	1.80637
FBgn0010651	l(2)08717	77.4039	42.8522	0.00211413	1.8063
FBgn0032503	CG16825	4.35542	2.44304	1	1.78278
FBgn0037010	CG4825	50.6378	28.4557	0.0149094	1.77953
FBgn0011296	l(2)efl	77.3812	43.5322	1	1.77756
FBgn0025687	LKR	16.7956	9.44901	0.768191	1.7775
FBgn0020513	ade5	488.533	276.559	0.00253976	1.76647
FBgn0024558	Dph5	11.7724	6.67143	0.799458	1.7646
FBgn0030642	CG15642	7.52442	4.29784	0.424427	1.75074
FBgn0052506	CG32506	9.33044	5.33753	1	1.74808
FBgn0003062	Fib	23.6639	13.5449	0.571478	1.74707
FBgn0021760	chb	21.3501	12.2552	0.000123934	1.74213
FBgn0032507	CG9377	19.7671	11.4046	0.254048	1.73325
FBgn0005391	Yp2	19132	11149.2	0.959152	1.716
FBgn0032264	Lip4	21.8415	12.7636	0.15465	1.71123
FBgn0003499	sr	5.32688	3.11759	0.881848	1.70865
FBgn0028360	l(1)G0148	24.7152	14.538	0.928121	1.70004
FBgn0031261	nAcRbeta-21C	21.4436	12.6223	0.932489	1.69886
FBgn0031497	CG17259	27.9617	16.4678	0.0146033	1.69796
FBgn0032050	CG13096	15.1326	8.92463	0.25451	1.6956
FBgn0026196	nop5	25.0164	14.7539	0.464362	1.69558
FBgn0000057	adp	15.6088	9.26535	0.676685	1.68465
FBgn0031313	CG5080	43.3279	25.7326	0.0169859	1.68378
FBgn0086450	su(r)	40.9617	24.4002	1	1.67874
FBgn0038256	CG7530	28.669	17.1466	0.784842	1.67199
FBgn0038250	CG3505	22.6202	13.5941	0.783506	1.66398
FBgn0041581	AttB	103.2	62.2196	0.775332	1.65865
FBgn0011722	Tig	45.2104	27.4109	1	1.64936
FBgn0011016	SsRbeta	119.621	72.598	0.278498	1.64772
FBgn0012042	AttA	99.2454	60.3103	0.702615	1.64558
FBgn0031061	CG14232	12.3587	7.515	0.716865	1.64453
FBgn0032198	eEF1delta	221.473	134.831	0.194006	1.64259
FBgn0086712	Egm	11.0757	6.7737	0.763012	1.63511
FBgn0031461	daw	40.8424	24.9822	1	1.63486
FBgn0029704	CG2982	11.2814	6.90372	0.47094	1.6341
FBgn0037632	Tcp-1eta	23.135	14.1665	0.0126023	1.63308
FBgn0031260	Spp	44.931	27.5486	1	1.63097
FBgn0033730	Cpr49Ag	43.683	26.8028	1	1.62979
FBgn0035121	Tudor-SN	62.209	38.2747	0.0584922	1.62533
FBgn0035539	slow	9.56543	5.88854	1	1.62441
FBgn0085195	CG34166	1134.88	699.272	1	1.62294
FBgn0027079	Aats-val	16.0867	9.91215	0.419149	1.62292
FBgn0036997	CG5955	43.2113	26.6937	1	1.61879
FBgn0261975	CG42806	26.0727	16.114	0.995905	1.61801
FBgn0025700	CG5885	104.944	65.2575	0.520667	1.60815
FBgn0086357	Sec61alpha	177.917	110.711	0.159571	1.60704
FBgn0262563	CG43103	87.3918	54.5363	0.0624155	1.60245
FBgn0032726	CG10621	217.626	136.013	0.137316	1.60004
FBgn0037447	Neurochondrin	15.41	9.64742	1	1.59732
FBgn0027094	Aats-ala	25.226	15.8074	0.117974	1.59583
FBgn0040827	CG13315	702.159	441.542	0.0710878	1.59024
FBgn0051324	CG31324	30.0301	18.9241	1	1.58687
FBgn0003308	ry	15.7001	9.9023	1	1.5855
FBgn0010591	Sply	37.3991	23.6252	1	1.58302
FBgn0052695	CG32695	65.5606	41.4369	1	1.58218
FBgn0030720	CG8939	13.6664	8.67545	0.349004	1.57529
FBgn0043791	CG8147	74.5624	47.8823	5.20166e-05	1.5572
FBgn0036337	CG11255	68.2836	43.8589	1	1.55689
FBgn0000409	Cyt-c-p	315.048	202.932	0.100199	1.55248
FBgn0010391	Gtp-bp	30.2162	19.4992	0.804553	1.54961
FBgn0033226	CG1882	27.3717	17.68	1	1.54817
FBgn0034412		23.6022	15.3154	0.855081	1.54108
FBgn0027088	Aats-gly	18.868	12.2751	0.202273	1.53709
FBgn0038964	Nop56	25.0286	16.2984	0.0101803	1.53565
FBgn0036381	CG8745	40.5477	26.4142	0.254048	1.53507
FBgn0030966	CG7280	10.5202	6.85575	1	1.5345
FBgn0263083	CG43351	296.572	193.49	1	1.53275
FBgn0069242	eca	30.6427	20.011	1	1.5313
FBgn0003965	v	55.5937	36.3828	1	1.52802
FBgn0029864	CG15894	6.66055	4.35971	1	1.52775
FBgn0085453	CG34424	51.1989	33.6154	1	1.52308
FBgn0034410	Topors	6.47873	4.25815	0.50071	1.52149
FBgn0037248	Spargel	8.02236	5.27331	0.837412	1.52131
FBgn0029992	Upf2	8.40567	5.5283	0.676685	1.52048
FBgn0038897	CG5849	10.5704	6.9523	1	1.52042
FBgn0038795	CG4335	45.4997	29.9868	0.952532	1.51732
FBgn0036919	Grasp65	20.2798	13.3794	1	1.51575
FBgn0026619	Taz	30.1	19.926	0.163007	1.51059
FBgn0036030	CG6767	148.083	98.3251	0.293111	1.50605
FBgn0032482	Pect	115.984	77.0156	0.837412	1.50599
FBgn0026562	BM-40-SPARC	202.646	134.758	0.340381	1.50378
FBgn0010621	Cct5	24.8077	16.4971	0.358862	1.50376
FBgn0025620	CG13360	57.7156	38.3831	0.676685	1.50367
FBgn0063491	GstE9	124.747	83.0594	0.804553	1.50191
FBgn0030321	CG1703	28.3621	18.8905	0.316146	1.5014
FBgn0023516	Pex5	18.9501	12.6425	0.515644	1.49892
FBgn0040237	bor	11.8783	7.94005	0.251914	1.49599
FBgn0016685	Nlp	45.9575	30.7845	0.117974	1.49288
FBgn0052425	CG32425	112.662	75.5933	3.77934e-07	1.49037
FBgn0027091	Aats-cys	12.9718	8.7166	1	1.48817
FBgn0003888	betaTub60D	14.8359	9.9842	1	1.48593
FBgn0021795	Tapdelta	84.6971	57.0256	0.306181	1.48525
FBgn0035909	ergic53	72.8694	49.1014	0.117974	1.48406
FBgn0015245	Hsp60	99.754	67.3266	0.19467	1.48164
FBgn0004885	tok	41.2241	27.8502	1	1.48021
FBgn0039929	CG11076	44.2108	29.949	0.759614	1.4762
FBgn0039789	CG9717	12.1825	8.25425	1	1.47591
FBgn0002526	LanA	9.8738	6.71386	0.594637	1.47066
FBgn0031256	CG4164	24.8151	16.8808	1	1.47002
FBgn0032596	Prosbeta4	44.7343	30.4449	0.383382	1.46935
FBgn0016075	vkg	26.1723	17.8312	0.36365	1.46778
FBgn0264386	Ca-alpha1T	25.3025	17.2417	1	1.46751
FBgn0010470	Fkbp13	90.6704	61.7886	1	1.46743
FBgn0030882	GS	14.1586	9.66122	1	1.46551
FBgn0052495	CG32495	14.1586	9.66122	1	1.46551
FBgn0052085	CG32085	13.4283	9.20337	1	1.45907
FBgn0034697	GM130	14.506	9.9461	1	1.45846
FBgn0033065	Cyp6w1	127.04	87.1905	0.804553	1.45704
FBgn0011571	caz	45.6915	31.4432	1	1.45315
FBgn0024963	GluClalpha	42.487	29.2758	1	1.45127
FBgn0035771	sec63	50.2918	34.6814	0.347067	1.45011
FBgn0003137	Ppn	76.1197	52.6667	0.0296905	1.44531
FBgn0040493	grsm	32.403	22.4566	0.0486658	1.44292
FBgn0263916	Ent2	18.6011	12.893	0.759614	1.44273
FBgn0033366	Ance-4	70.8453	49.3052	1	1.43687
FBgn0030343	ATP7	12.0093	8.36434	0.597453	1.43577
FBgn0028543	NimB2	117.605	81.9401	0.837412	1.43526
FBgn0027080	Aats-tyr	26.4646	18.4701	0.705305	1.43284
FBgn0030336	CG1578	24.348	17.0126	0.202273	1.43117
FBgn0000053	ade3	53.628	37.6006	1	1.42625
FBgn0002284	Prosbeta6	41.0903	28.8152	0.800885	1.42599
FBgn0047135	CG32276	302.434	212.132	1	1.42569
FBgn0024509	Sec13	26.7573	18.7724	0.928121	1.42535
FBgn0014141	cher	15.4829	10.8721	0.698913	1.42409
FBgn0035206	CG9186	34.8897	24.5174	0.959152	1.42306
FBgn0016693	Past1	27.7951	19.5339	0.600266	1.42291
FBgn0001142	Gs1	121.764	85.6045	1	1.42241
FBgn0010638	Sec61beta	118.558	83.3591	1	1.42225
FBgn0004057	Zw	20.6429	14.5158	0.948731	1.4221
FBgn0031049	Sec61gamma	78.9667	55.5531	1	1.42146
FBgn0034501	CG13868	209.001	147.052	1	1.42127
FBgn0031020	Nat1	14.2506	10.0367	0.40913	1.41985
FBgn0034276	CG6385	21.9415	15.4717	1	1.41818
FBgn0002787	Rpn8	38.8149	27.3857	1	1.41734
FBgn0034997	CG3376	23.363	16.5072	1	1.41532
FBgn0031417	CG3597	112.882	79.8728	1	1.41327
FBgn0000565	Eip71CD	51.1166	36.1839	1	1.41269
FBgn0051660	pog	13.6083	9.63547	1	1.41232
FBgn0036857	CG9629	28.1676	19.9866	1	1.40933
FBgn0262126	gho	28.1153	20.001	0.753784	1.40569
FBgn0030362	regucalcin	162.37	115.53	0.0296565	1.40544
FBgn0004045	Yp1	35453.1	25239.6	0.867561	1.40466
FBgn0000566	Eip55E	30.8822	21.9942	1	1.40411
FBgn0030060	CG2004	29.9012	21.3007	0.302026	1.40377
FBgn0020369	Rpt6	47.0921	33.591	0.676685	1.40193
FBgn0034753	CG2852	174.361	124.403	1	1.40159
FBgn0014011	Rac2	26.5644	18.9788	0.176328	1.39969
FBgn0260746	Ect3	29.2261	20.8961	0.594637	1.39864
FBgn0031836	CG11050	60.3217	43.1471	0.364328	1.39805
FBgn0030593	CG9512	290.872	208.537	1.99164e-07	1.39482
FBgn0027560	Tps1	286.136	205.278	0.0983771	1.3939
FBgn0036837	CG18135	207.004	148.518	0.000559226	1.3938
FBgn0052677	X11Lbeta	20.0001	14.362	0.977128	1.39257
FBgn0027329	Tcp-1zeta	21.9867	15.8022	0.587255	1.39137
FBgn0087008	e(y)3	9.54539	6.87733	0.928121	1.38795
FBgn0259175	ome	18.6933	13.4968	0.866329	1.38502
FBgn0029932	CG4607	18.8971	13.6441	1	1.385
FBgn0005585	Crc	343.844	248.384	0.0486658	1.38432
FBgn0005278	Sam-S	192.397	139.002	1	1.38413
FBgn0005674	Aats-glupro	21.6876	15.6713	1	1.3839
FBgn0028327	l(1)G0320	137.767	99.6249	0.527989	1.38285
FBgn0029823	CG3011	105.46	76.3292	0.016768	1.38164
FBgn0034618	CG9485	27.9744	20.2531	1	1.38124
FBgn0001098	Gdh	125.283	90.7904	0.960402	1.37992
FBgn0038975	Nrx-1	27.2697	19.8118	1	1.37643
FBgn0035087	CG2765	49.7338	36.1579	0.957589	1.37546
FBgn0263321	CG43402	111.392	81.0021	1	1.37517
FBgn0034588	CG9394	31.8305	23.1859	0.249328	1.37284
FBgn0015283	Rpn10	40.4759	29.5155	0.703236	1.37134
FBgn0008635	betaCop	26.5694	19.4504	1	1.36601
FBgn0035091	CG3829	53.4721	39.1655	0.324759	1.36528
FBgn0000299	Cg25C	48.6436	35.7039	0.413043	1.36242
FBgn0024556	EfTuM	34.8496	25.5959	0.340381	1.36153
FBgn0002780	mod	64.1863	47.1699	1	1.36075
FBgn0027073	CG4302	48.6606	35.7671	1	1.36049
FBgn0023212	Elongin-B	99.5402	73.1712	0.676685	1.36037
FBgn0035092	Nplp1	25.6947	18.9163	1	1.35834
FBgn0001257	ImpL2	69.45	51.1433	1	1.35795
FBgn0039229	Saf-B	38.9309	28.7308	0.676685	1.35502
FBgn0033339	sec31	17.0496	12.616	1	1.35143
FBgn0026252	msk	40.1911	29.7534	0.0742621	1.35081
FBgn0036975	CG5618	84.429	62.5394	1	1.35001
FBgn0004575	Syn	67.9714	50.4492	1	1.34732
FBgn0038914	fit	1652.39	1229.49	0.822196	1.34396
FBgn0001125	Got2	205.179	152.731	1	1.3434
FBgn0030086	CG7033	26.3976	19.6614	0.336291	1.34261
FBgn0052190	NUCB1	102.09	76.2467	1	1.33894
FBgn0014018	Rel	47.2132	35.2943	0.571478	1.3377
FBgn0026576	CG5991	140.752	105.285	1	1.33687
FBgn0035807	CG7492	19.2463	14.427	1	1.33404
FBgn0034802	CG3800	289.308	216.987	0.0101682	1.3333
FBgn0004047	Yp3	30057.3	22543.9	1	1.33328
FBgn0262483	Rbp	28.8645	21.6555	1	1.3329
FBgn0032136	Apoltp	108.78	81.6145	1	1.33285
FBgn0066101	LpR1	24.3434	18.2835	0.783102	1.33144
FBgn0029941	CG1677	26.7129	20.0759	0.931074	1.3306
FBgn0028695	Rpn1	31.5369	23.7103	0.997758	1.33009
FBgn0031913	CG5958	129.993	97.7798	0.698955	1.32945
FBgn0039647	CG14509	35.9926	27.1033	1	1.32798
FBgn0021765	scu	88.559	66.7791	0.574641	1.32615
FBgn0040993	CG17325	295.602	223.116	1	1.32488
FBgn0263220	Hk	51.1618	38.6469	1	1.32383
FBgn0037705	mura	34.4986	26.1407	0.890672	1.31973
FBgn0263456	nwk	58.1882	44.1292	1	1.31859
FBgn0019624	CoVa	266.561	202.18	0.533812	1.31843
FBgn0010114	hig	65.2577	49.6134	1	1.31533
FBgn0030041	CG12116	196.717	149.566	0.523564	1.31525
FBgn0032797	CG10186	108.814	82.7498	1	1.31497
FBgn0003638	su(w[a])	49.0489	37.314	1	1.31449
FBgn0053138	AGBE	49.9051	38.1502	1	1.30812
FBgn0011695	PebIII	1499.36	1146.58	0.147276	1.30768
FBgn0027567	CG8108	55.6291	42.5846	0.762603	1.30632
FBgn0031306	CG4577	120.99	92.8756	1	1.30271
FBgn0030674	CG8184	13.8698	10.6486	1	1.3025
FBgn0259240	Ten-a	27.0899	20.8463	1	1.29951
FBgn0004654	Pgd	57.5454	44.3341	1	1.29799
FBgn0036547	CG17032	55.7004	42.931	1	1.29744
FBgn0004587	B52	71.7869	55.3349	1	1.29732
FBgn0261710	nocte	32.9389	25.4839	0.881848	1.29254
FBgn0027835	Dp1	95.6684	74.1601	1	1.29003
FBgn0030706	CG8909	18.1196	14.0517	1	1.2895
FBgn0001218	Hsc70-3	333.618	258.819	1	1.289
FBgn0031294	IA-2	403.657	313.884	1	1.28601
FBgn0053547	Rim	27.993	21.8522	1	1.28102
FBgn0020306	dom	21.9988	17.2294	1	1.27682
FBgn0038693	unc79	31.5154	24.699	1	1.27598
FBgn0052654	Sec16	22.3814	17.5592	1	1.27463
FBgn0003360	sesB	1021.35	802.938	0.867561	1.27202
FBgn0085434	NaCP60E	37.3133	29.3539	0.626133	1.27115
FBgn0262730	CG14446	29.3964	23.1265	1	1.27112
FBgn0004396	CrebA	32.2828	25.4369	0.0943918	1.26913
FBgn0261551	CG42669	39.2869	31.0815	0.843736	1.264
FBgn0035917	Zasp66	157.252	124.594	1	1.26211
FBgn0011211	blw	395.695	314.638	1	1.25762
FBgn0037351	RpL13A	936.034	746.302	0.176812	1.25423
FBgn0003861	trp	299.144	239.614	1	1.24844
FBgn0014002	Pdi	277.86	223.091	1	1.2455
FBgn0001145	Gs2	526.623	425.418	0.662217	1.23789
FBgn0053229	CG33229	16.4283	15.1271	1	1.08602
FBgn0050159	CG30159	10.716	10.7955	1	0.992635
FBgn0004907	14-3-3zeta	516.572	564.525	1	0.915056
FBgn0011837	Tis11	34.8205	39.4565	1	0.882505
FBgn0020304	drongo	33.8982	38.6898	1	0.876153
FBgn0004435	Galphaq	210.249	243.749	0.652446	0.862563
FBgn0053523	CG33523	23.7679	27.7437	1	0.856694
FBgn0016126	CaMKI	137.677	160.81	0.762603	0.856147
FBgn0004828	His3.3B	380.483	445.416	1	0.854219
FBgn0024734	PRL-1	64.288	75.3772	0.918368	0.852884
FBgn0015766	Msr-110	406.96	481.071	1	0.845947
FBgn0030608	Lsd-2	192.092	228.157	1	0.841928
FBgn0001942	eIF-4a	576.499	686.369	1	0.839927
FBgn0039300	RpS27	330.885	395.664	1	0.836278
FBgn0038947	Sar1	104.37	124.908	1	0.835577
FBgn0086687	desat1	913.5	1098.96	1	0.831243
FBgn0010225	Gel	219.019	263.998	0.563865	0.829623
FBgn0012034	AcCoAS	228.054	275.761	0.698955	0.826999
FBgn0014010	Rab5	146.972	177.8	0.759614	0.826612
FBgn0002773	Mlc2	165.024	200.166	0.0742621	0.824436
FBgn0039925	Kif3C	17.9005	21.726	0.419149	0.823923
FBgn0004629	Cys	221.178	268.477	1	0.823825
FBgn0000406	Cyt-b5-r	192.063	233.543	1	0.82239
FBgn0024733	RpL10	856.666	1041.76	1	0.822329
FBgn0000261	Cat	95.0816	115.699	1	0.821801
FBgn0013676	mt:CoIII	3942.38	4798.95	0.676685	0.821509
FBgn0010548	Aldh-III	59.3061	72.1947	1	0.821474
FBgn0026439	Eaat1	73.6728	89.9088	1	0.819417
FBgn0014184	Oda	273.022	334.098	0.937137	0.817192
FBgn0051522	CG31522	38.1627	46.7121	0.629499	0.816978
FBgn0001128	Gpdh	435.423	535.38	1	0.813297
FBgn0033820	CG4716	1299.11	1597.49	0.23293	0.813216
FBgn0031914	CG5973	73.1958	90.0471	1	0.812862
FBgn0033777	CG17574	33.222	41.0614	0.923491	0.809081
FBgn0052672	Atg8a	200.973	248.401	1	0.809068
FBgn0032840	sNPF	30.1766	37.3321	0.902549	0.808328
FBgn0031734	CG11147	35.5897	44.0713	1	0.807547
FBgn0020236	ATPCL	73.794	91.6626	0.625966	0.805061
FBgn0025683	CG3164	187.679	233.147	1	0.80498
FBgn0087002	Rfabg	2558.78	3180.25	0.0271058	0.804586
FBgn0039923	MED26	21.1246	26.2555	0.860068	0.804577
FBgn0027611	LM408	148.641	184.77	0.928121	0.804465
FBgn0000592	Est-6	188.13	233.86	1	0.804456
FBgn0001208	Hn	240.196	298.585	1	0.804447
FBgn0083956	CG34120	23.5586	29.3217	1	0.803452
FBgn0051523	CG31523	59.1449	73.7011	1	0.802497
FBgn0016797	fz2	22.682	28.2703	1	0.802324
FBgn0034162	CG6426	135.708	169.215	1	0.801985
FBgn0085759	CR40640	2400.63	2999.65	0.824854	0.800304
FBgn0004432	Cyp1	257.604	321.922	1	0.800207
FBgn0000370	crc	351.11	439.024	0.416311	0.799751
FBgn0015576	alpha-Est8	42.1127	52.7377	1	0.798531
FBgn0029990	CG2233	2794.03	3499.09	0.000111759	0.798502
FBgn0033261	CG18316	26.3732	33.0458	0.278498	0.79808
FBgn0010435	emp	73.3343	91.8967	1	0.798008
FBgn0001234	Hsromega	88.1091	110.451	0.299192	0.797721
FBgn0058469	CR40469	2377.45	2985.71	0.552146	0.796274
FBgn0259715	CG42369	152.049	191.433	0.867561	0.794264
FBgn0261859	CG42788	15.4097	19.4248	0.870297	0.793302
FBgn0035020	CG13585	61.6405	77.714	0.336291	0.793171
FBgn0029092	ced-6	58.7126	74.0504	1	0.792874
FBgn0036211	CG5946	122.447	154.67	1	0.791667
FBgn0039928	Cals	66.4111	83.98	0.789307	0.790797
FBgn0004513	Mdr65	11.0735	14.0283	1	0.789372
FBgn0035726	CG9953	45.1397	57.1884	1	0.789316
FBgn0013674	mt:CoI	4055.23	5140.51	0.233132	0.788876
FBgn0032897	CG9336	221.342	280.602	1	0.788811
FBgn0085757	CR40621	3645.34	4625.61	1	0.788079
FBgn0027930	MP1	47.1688	59.8952	0.843631	0.787523
FBgn0039114	Lsd-1	85.058	108.055	1	0.787175
FBgn0035975	PGRP-LA	36.4178	46.2723	0.698955	0.787033
FBgn0052017	CG32017	34.7983	44.2344	0.860068	0.786679
FBgn0037715	CG9399	48.1098	61.1828	1	0.786329
FBgn0016726	RpL29	962.908	1225.47	1	0.785744
FBgn0033875	CG6357	88.7642	113.015	1	0.785421
FBgn0262952	mt:ND4	413.863	527.117	0.192935	0.785144
FBgn0028480	CG17841	121.779	155.17	1	0.784808
FBgn0004364	18w	11.8032	15.0458	1	0.784485
FBgn0038733	CG11407	20.9093	26.6652	1	0.784141
FBgn0040007	RpL38	562.133	717.019	0.870297	0.783986
FBgn0026192	par-6	17.3469	22.1448	0.621831	0.78334
FBgn0026401	Nipped-B	24.8947	31.8534	0.822196	0.78154
FBgn0052068	CG32068	74.5909	95.482	0.314553	0.781204
FBgn0033889	CG6701	8.96324	11.4741	1	0.781174
FBgn0044510	mRpS5	38.1502	48.8825	0.952532	0.780448
FBgn0030724	Nipsnap	64.2909	82.5483	0.281925	0.778828
FBgn0260798	Gprk1	30.3993	39.1013	0.600266	0.77745
FBgn0031969	pes	19.1607	24.7214	0.960402	0.775065
FBgn0041180	Tep4	59.7459	77.3226	1	0.772683
FBgn0013981	His4r	274.385	357.07	1	0.768435
FBgn0032689	CG10413	10.4693	13.636	0.959152	0.767772
FBgn0052009	CR32009	4.55924	5.94528	0.43751	0.766867
FBgn0026084	cib	60.0339	78.3092	1	0.766627
FBgn0032200	CG5676	47.8664	62.5138	0.977128	0.765693
FBgn0037723	SpdS	58.5911	76.8617	0.962971	0.762293
FBgn0036862	Gbs-76A	22.0711	29.0429	1	0.759947
FBgn0031449	CG31689	63.3099	83.4137	1	0.758987
FBgn0016917	Stat92E	75.9491	100.24	0.0301105	0.757671
FBgn0085802	CR41548	2192.49	2895.5	1	0.757206
FBgn0035076	Ance-5	28.0923	37.1315	1	0.756561
FBgn0040256	Ugt86Dd	44.1794	58.408	0.416311	0.756393
FBgn0033980	Cyp6a20	39.0722	51.6713	1	0.756169
FBgn0034229	CG4847	141.509	187.188	1	0.755973
FBgn0261560	Thor	207.045	274.925	0.00492518	0.753095
FBgn0260799	p120ctn	43.4133	57.6689	1	0.752803
FBgn0039958	CG12567	13.6215	18.0976	1	0.752668
FBgn0029508	Tsp42Ea	73.829	98.2212	0.659463	0.751661
FBgn0031220	CG4822	24.8728	33.1808	1	0.749615
FBgn0052441	CG32441	27.4406	36.6569	1	0.74858
FBgn0041713	yellow-c	6.67123	8.91438	1	0.748367
FBgn0036991	CG5872	3.37158	4.51272	0.552146	0.747128
FBgn0058178	CG40178	45.5129	61.038	0.788705	0.745648
FBgn0025592	Gyk	24.1935	32.5095	1	0.744199
FBgn0034142	CG8306	18.0652	24.3034	1	0.74332
FBgn0035978	UGP	149.22	200.854	0.416311	0.742928
FBgn0030136	RpS28b	705.4	950.369	0.676685	0.742238
FBgn0062978	CG31808	48.8432	65.9049	0.237601	0.741116
FBgn0013681	mt:ND3	339.657	459.012	0.70273	0.739974
FBgn0027932	Akap200	46.42	62.7446	1	0.739825
FBgn0032949	Lamp1	150.011	202.988	0.648016	0.739015
FBgn0085795	CR41535	1865.98	2529.42	0.702615	0.737713
FBgn0031418	CG3609	39.5247	53.6357	1	0.73691
FBgn0261504	7SLRNA:CR42652	804.801	1092.3	1	0.736796
FBgn0259682	Jabba	83.3582	113.151	0.977128	0.736701
FBgn0051313	CG31313	84.146	114.481	1	0.735024
FBgn0058006	CG40006	14.4074	19.6049	1	0.734887
FBgn0042201	Nplp3	1008.98	1374.52	0.676685	0.734056
FBgn0002566	lt	12.5491	17.1099	0.775332	0.733443
FBgn0027552	CG10863	155.437	212.091	0.884932	0.73288
FBgn0031305	Iris	82.6032	112.748	0.339211	0.732633
FBgn0000477	DNaseII	48.2181	65.8339	1	0.732421
FBgn0000003	7SLRNA:CR32864	804.827	1099.48	1	0.732007
FBgn0027562	CG10345	26.7584	36.5717	1	0.731669
FBgn0085758	CR40639	1316.71	1799.95	0.768847	0.731527
FBgn0085777	CR40959	1266.82	1732.13	1	0.731365
FBgn0002868	MtnA	521.803	713.868	0.56608	0.730952
FBgn0037935	CG6834	11.2256	15.3697	0.416311	0.73037
FBgn0051997	CG31997	45.1942	61.9001	1	0.730116
FBgn0260008	Ucrh	164.936	225.957	0.72079	0.729944
FBgn0005612	Sox14	7.49088	10.2623	0.595314	0.729942
FBgn0032997	CG17486	16.0529	22.0052	0.969098	0.729504
FBgn0030968	CG7322	49.8977	68.5211	0.702615	0.728209
FBgn0046692	Stlk	12.3719	17.0005	1	0.727738
FBgn0035528	CG15012	35.5811	48.9066	0.92339	0.727533
FBgn0260987	vtd	19.2183	26.4476	0.705058	0.726658
FBgn0025697	santa-maria	23.4007	32.2184	0.767185	0.726316
FBgn0028526	CG15293	302.019	416.001	0.594637	0.726005
FBgn0085807	CR41590	2122.9	2930.12	1	0.724512
FBgn0051769	CG31769	121.38	167.552	0.92114	0.724434
FBgn0032076	CG9510	28.8955	39.9156	0.705058	0.723914
FBgn0085771	CR40741	1174.41	1627.19	1	0.721743
FBgn0040005	CG17883	26.0138	36.1025	1	0.720553
FBgn0033031	CG8245	16.5829	23.0376	1	0.719816
FBgn0086909	CG31751	14.6698	20.4107	0.726173	0.718728
FBgn0002719	Men	122.268	171.282	0.0332577	0.713842
FBgn0013675	mt:CoII	1188.11	1667.79	0.0989864	0.712382
FBgn0053080	CG33080	12.7735	17.9579	1	0.711304
FBgn0015039	Cyp9b2	46.549	65.5719	0.336291	0.709893
FBgn0039324	CG10553	15.2926	21.5905	1	0.708301
FBgn0003748	Treh	58.3554	82.4993	1	0.707344
FBgn0040259	Ugt86Da	15.8528	22.4772	1	0.705284
FBgn0039914	mav	8.63622	12.2485	1	0.705086
FBgn0038198	Npc2b	70.5898	100.292	1	0.703845
FBgn0030013	GIIIspla2	18.5612	26.3861	1	0.703445
FBgn0085360	CG34331	55.0239	78.351	1	0.702275
FBgn0036106	CG6409	323.787	461.89	1	0.701004
FBgn0031942	CG7203	45.2625	64.598	1	0.700679
FBgn0039970	CG17508	93.4971	133.618	0.147276	0.699735
FBgn0085826	CR41620	384.241	549.47	0.306181	0.699293
FBgn0250731	5.8SrRNA:CR40454	1475.05	2109.43	0.302026	0.699264
FBgn0035484	CG11594	69.0185	98.8938	0.0912343	0.697905
FBgn0085774	CR40779	3940.58	5663.5	1	0.695785
FBgn0261990	CG42808	35.2993	50.7431	1	0.695647
FBgn0050359	Mal-A5	26.5979	38.3599	0.931074	0.693379
FBgn0033448	hebe	9.82489	14.1776	0.902549	0.692989
FBgn0040754	CG17059	31.2334	45.091	0.698482	0.692675
FBgn0085772	CR40743	384.931	555.803	0.306181	0.692568
FBgn0036765	CG7408	5.39818	7.82486	1	0.689875
FBgn0038037	Cyp9f2	44.806	65.0751	1	0.688527
FBgn0032494	CG5945	98.1188	142.622	1	0.687966
FBgn0051103	CG31103	14.1106	20.5171	0.275009	0.687748
FBgn0033564	Pex6	3.51362	5.11555	0.324759	0.686851
FBgn0036844	Mkp3	12.9395	18.8467	1	0.686567
FBgn0034728	rad50	3.55682	5.20648	0.698955	0.683152
FBgn0033551	CG7222	13.6647	20.0885	0.698482	0.680226
FBgn0029765	CG16756	51.5785	76.021	1	0.678476
FBgn0027586	CG5867	66.9462	98.9	1	0.676908
FBgn0039889	CG2219	30.6536	45.3458	0.447835	0.675997
FBgn0040260	Ugt36Bc	12.8089	18.9889	1	0.67455
FBgn0039994	CG17082	19.8461	29.5004	0.278498	0.672739
FBgn0003189	r	4.14299	6.16481	1	0.672038
FBgn0015570	alpha-Est2	41.2815	61.5429	0.573459	0.670776
FBgn0026238	gus	23.1281	34.5333	0.454451	0.669732
FBgn0030421	CG3812	18.9925	28.55	0.352186	0.665234
FBgn0038236	Cyp313a1	31.3494	47.1771	0.698955	0.664504
FBgn0260228	CG42502	595.332	897.28	0.47094	0.663485
FBgn0085817	CR41607	1096.04	1659.05	1	0.660641
FBgn0085764	CR40668	1397.74	2116.87	0.759614	0.660284
FBgn0037090	Est-Q	19.9661	30.2508	1	0.660018
FBgn0036926	CG7646	35.3399	53.5469	1	0.659981
FBgn0053494	CG33494	25.8651	39.2918	1	0.658282
FBgn0261640	CR42723	16.3767	24.9118	0.89283	0.657389
FBgn0038665	CG12269	39.1259	59.6099	1	0.656366
FBgn0261639	CR42722	16.0196	24.5539	0.870297	0.652426
FBgn0033373	CG8080	11.8251	18.1445	1	0.651715
FBgn0052726	CG32726	45.8064	70.5129	1	0.649617
FBgn0032835	CG16772	117.182	180.88	1	0.647844
FBgn0052407	CG32407	14.413	22.2597	1	0.647492
FBgn0034509	Obp57c	110.961	171.994	1	0.645144
FBgn0038214	CG9616	28.6568	44.538	1	0.643423
FBgn0037560	CR18228	12.5359	19.4841	1	0.643388
FBgn0085767	CR40685	213.152	332.034	0.347067	0.641959
FBgn0053178	CG33178	25.1186	39.2236	1	0.640394
FBgn0035290	CG1887	36.2648	56.8333	1	0.63809
FBgn0030196	Psf3	28.7344	45.0336	1	0.638067
FBgn0038820	CG4000	52.2641	81.9335	1	0.637885
FBgn0038865	CG10824	10.4218	16.367	0.92339	0.63676
FBgn0085810	CR41597	11.5666	18.2674	0.737744	0.633187
FBgn0061356	CG18003	18.2032	28.852	0.324759	0.630915
FBgn0025456	CREG	20.2069	32.2139	0.314553	0.627272
FBgn0030603	CG5541	8.24048	13.1377	0.698482	0.627239
FBgn0040733	CG15068	492.894	786.54	2.21474e-05	0.626661
FBgn0039678	Obp99a	220.854	353.056	0.702615	0.62555
FBgn0033775	Cyp9h1	7.6016	12.158	0.698955	0.625232
FBgn0028540	CG9008	9.45569	15.1666	1	0.623454
FBgn0032297	CG17124	49.2561	79.0412	0.698482	0.62317
FBgn0013772	Cyp6a8	7.64516	12.2736	1	0.622893
FBgn0040020	MED21	13.321	21.4746	0.800885	0.620314
FBgn0036992	CG11796	38.1966	62.0016	1	0.616058
FBgn0027259	Kmn1	3.47013	5.63839	0.881848	0.615447
FBgn0028491	CG2930	3.92019	6.3812	1	0.614334
FBgn0030234	CG15211	7.09938	11.5672	0.278498	0.613751
FBgn0025595	AkhR	25.8373	42.1663	1	0.612748
FBgn0051205	CG31205	72.2239	118.739	1	0.608258
FBgn0039611	CG14528	15.5164	25.5835	1	0.606502
FBgn0036353	CG10171	4.92095	8.11491	1	0.606408
FBgn0029942	CG2059	6.73224	11.1631	0.55037	0.603081
FBgn0013688	mt:srRNA	63.0173	104.873	1	0.60089
FBgn0063670	CG40228	31.5948	52.7006	0.702615	0.599516
FBgn0025454	Cyp6g1	33.4867	56.0076	0.00222876	0.597895
FBgn0030895	CG7135	8.01746	13.4495	1	0.596117
FBgn0035434	Drsl5	82.991	139.243	1	0.596017
FBgn0086378	Alg-2	14.1545	23.8548	0.0121403	0.593362
FBgn0003067	Pepck	336.038	576.634	0.742207	0.582758
FBgn0013679	mt:ND1	1169.51	2011.26	0.00123775	0.581481
FBgn0043535	Obp57a	45.2351	77.9838	1	0.580058
FBgn0032266	CG18302	5.80542	10.0546	1	0.57739
FBgn0032213	CG5390	54.5053	94.4606	1	0.577016
FBgn0262538	CG43092	20.302	35.1936	0.676685	0.576867
FBgn0085625	CG41343	31.7496	55.4592	0.560766	0.572486
FBgn0031816	CG16947	3.78207	6.63444	0.011307	0.570066
FBgn0016013	Faa	6.43213	11.4663	1	0.560961
FBgn0024222	ird5	3.72012	6.6533	1	0.55914
FBgn0038002	CG12256	1.60655	2.87708	1	0.558398
FBgn0013686	mt:lrRNA	14041	25218.2	0.000746543	0.556782
FBgn0042119	Cpr65Au	76.9025	139.006	1	0.553232
FBgn0037697	GstZ2	8.30342	15.016	1	0.552973
FBgn0034479	CG8654	26.5007	48.0979	1	0.550975
FBgn0085737	CR40502	749.81	1364.69	0.789307	0.549437
FBgn0052282	Drsl4	17.1783	31.2795	1	0.549188
FBgn0085756	CR40613	6.8618	12.5565	1	0.546474
FBgn0011705	rost	45.9843	84.3445	0.0742621	0.545197
FBgn0033981	Cyp6a21	3.49464	6.41866	1	0.54445
FBgn0027109	npf	13.9596	25.6645	0.254132	0.543928
FBgn0030816	CG16700	5.54013	10.2255	0.926133	0.541794
FBgn0051207	CG31207	7.34226	13.5939	0.97409	0.540113
FBgn0033799	GLaz	11.3281	20.9936	1	0.539596
FBgn0034262	swi2	2.34779	4.48601	0.314336	0.523358
FBgn0036428	CG9238	67.1025	129.428	0.000159755	0.518453
FBgn0031182	Cyp6t1	7.74805	15.0146	1	0.516033
FBgn0262353	CR43051	42.2633	81.9186	0.729642	0.515918
FBgn0013771	Cyp6a9	8.82233	17.3842	0.884932	0.507491
FBgn0085818	CR41608	12.654	25.1896	1	0.502351
FBgn0032400	CG6770	521.8	1039.82	1.16476e-08	0.501817
FBgn0043534	Obp57b	14.6915	29.2914	0.47094	0.501563
FBgn0033644	Tret1-2	1.27673	2.55604	0.960402	0.499495
FBgn0053926	CG33926	16.8668	33.8364	1	0.498482
FBgn0033978	Cyp6a23	3.46906	6.9619	1	0.498293
FBgn0037105	S1P	1.97761	3.9796	0.759614	0.496937
FBgn0040099	lectin-28C	55.7286	112.743	0.523564	0.494296
FBgn0035480	CG14984	12.3661	25.0391	1	0.493871
FBgn0001224	Hsp23	5.31297	10.769	0.813087	0.493359
FBgn0039896	yellow-h	4.68073	9.54686	1	0.49029
FBgn0034165	CG6435	10.9079	22.3296	0.829397	0.488493
FBgn0030828	CG5162	14.5096	30.1716	0.977128	0.480903
FBgn0034440	CG10073	2.16283	4.51244	1	0.479304
FBgn0085752	CR40594	11.6128	24.237	1	0.479133
FBgn0085755	CR40611	1.9643	4.1097	1	0.477967
FBgn0034438	CG9416	4.11506	8.72729	1	0.471516
FBgn0033093	CG3270	3.52567	7.49119	1	0.470643
FBgn0038738	CG4572	17.7727	38.1471	1	0.465899
FBgn0043799	CG31381	0.651435	1.41383	0.00220243	0.460759
FBgn0050440	CG30440	1.70494	3.70059	1	0.46072
FBgn0030178	CG2974	3.11567	6.821	0.724233	0.456776
FBgn0031694	Cyp4ac2	5.57942	12.5274	1	0.445379
FBgn0040942	CG12643	4.47696	10.1343	1	0.441762
FBgn0036910	Cyp305a1	3.11053	7.05875	1	0.440663
FBgn0036332	CG11261	1.22324	2.79357	1	0.437877
FBgn0030589	CG9519	2.89671	6.81223	0.940428	0.425222
FBgn0033574	Spn47C	4.05808	9.71505	1	0.417711
FBgn0032084	CG13101	2.24804	5.41458	1	0.415182
FBgn0043792	CG30427	4.07784	10.0628	0.666498	0.405238
FBgn0003390	shf	3.93591	9.78274	1	0.402332
FBgn0032260	CG13144	1.81412	4.51132	0.580229	0.402125
FBgn0031542	CG15414	2.11742	5.35013	0.919108	0.39577
FBgn0263336	CR43417	4.60487	11.7805	1	0.390888
FBgn0015035	Cyp4e3	10.8075	28.04	1	0.385432
FBgn0002565	Lsp2	502.935	1318.66	1	0.381398
FBgn0027584	CG4757	23.7218	62.5544	1	0.379219
FBgn0053430	5SrRNA:CR33430	1.02991	2.74024	1	0.375845
FBgn0085803	CR41550	12.6542	35.5912	1	0.355543
FBgn0053445	5SrRNA:CR33445	0.851968	2.44827	1	0.347988
FBgn0085744	CR40561	0.989218	2.8447	0.705975	0.347741
FBgn0004186	snRNA:U1:95Cb	6.49656	19.3235	0.843631	0.3362
FBgn0053397	5SrRNA:CR33397	0.955546	2.8734	1	0.332549
FBgn0263454	CR43477	1.68671	5.09215	1	0.331237
FBgn0053414	5SrRNA:CR33414	0.939526	2.84154	1	0.33064
FBgn0033268	Obp44a	117.871	360.363	0.959152	0.327091
FBgn0053413	5SrRNA:CR33413	0.910356	2.79961	1	0.325172
FBgn0003916	snRNA:U1:21D	6.49656	19.9823	0.843631	0.325116
FBgn0004185	snRNA:U1:95Ca	6.49656	19.9823	0.843631	0.325116
FBgn0053377	5SrRNA:CR33377	0.787983	2.42402	1	0.325073
FBgn0053431	5SrRNA:CR33431	0.913179	2.8751	1	0.317616
FBgn0053387	5SrRNA:CR33387	0.945172	3.03515	1	0.311408
FBgn0043783	CG32444	114.764	369.677	0.0121403	0.310445
FBgn0026563	CG1979	0.753279	2.44849	0.621831	0.30765
FBgn0053380	5SrRNA:CR33380	0.801133	2.62382	1	0.305331
FBgn0053384	5SrRNA:CR33384	0.867989	2.84683	1	0.304896
FBgn0053370	5SrRNA:CR33370	0.803956	2.67591	1	0.300442
FBgn0053362	5SrRNA:CR33362	0.833173	2.7783	1	0.299886
FBgn0034468	Obp56a	6.82104	22.9555	0.921965	0.297142
FBgn0053376	5SrRNA:CR33376	0.939526	3.2342	1	0.290497
FBgn0053415	5SrRNA:CR33415	0.787983	2.7652	1	0.284964
FBgn0053381	5SrRNA:CR33381	0.872671	3.18868	1	0.273678
FBgn0034253	CG10936	0.343972	1.26482	1	0.271954
FBgn0053404	5SrRNA:CR33404	0.703249	2.58672	1	0.271869
FBgn0053426	5SrRNA:CR33426	0.843501	3.11097	1	0.271138
FBgn0053386	5SrRNA:CR33386	0.758768	2.86097	1	0.265214
FBgn0053425	5SrRNA:CR33425	0.723951	2.79044	1	0.259439
FBgn0053385	5SrRNA:CR33385	0.785113	3.05411	1	0.257068
FBgn0053368	5SrRNA:CR33368	0.723951	2.82088	1	0.25664
FBgn0053379	5SrRNA:CR33379	0.785161	3.0673	1	0.255978
FBgn0053435	5SrRNA:CR33435	0.771963	3.08734	1	0.250042
FBgn0004187	snRNA:U1:95Cc	1.8521	7.42383	0.979755	0.24948
FBgn0053395	5SrRNA:CR33395	0.737148	2.98093	1	0.247288
FBgn0053396	5SrRNA:CR33396	0.769141	3.11749	1	0.246718
FBgn0053421	5SrRNA:CR33421	0.58556	2.53746	1	0.230766
FBgn0053374	5SrRNA:CR33374	0.636395	2.76945	1	0.229791
FBgn0053429	5SrRNA:CR33429	0.58556	2.58672	1	0.226372
FBgn0053373	5SrRNA:CR33373	0.636395	2.88257	1	0.220774
FBgn0053392	5SrRNA:CR33392	0.675938	3.12761	1	0.21612
FBgn0053433	5SrRNA:CR33433	0.636395	2.97082	1	0.214215
FBgn0053436	5SrRNA:CR33436	0.627926	2.95546	1	0.212463
FBgn0261575	tobi	51.3802	241.878	4.21869e-05	0.212422
FBgn0053358	5SrRNA:CR33358	0.654274	3.18277	1	0.205567
FBgn0053394	5SrRNA:CR33394	0.675938	3.29433	1	0.205183
FBgn0053434	5SrRNA:CR33434	0.588383	2.95281	0.965701	0.199262
FBgn0053446	5SrRNA:CR33446	0.636395	3.24087	1	0.196366
FBgn0036750	CG6034	0.293644	1.54715	0.123985	0.189797
FBgn0053388	5SrRNA:CR33388	0.524351	2.84622	0.965701	0.184227
FBgn0053359	5SrRNA:CR33359	0.601533	3.39501	1	0.177182
FBgn0053403	5SrRNA:CR33403	0.468786	2.64608	0.908485	0.177162
FBgn0053393	5SrRNA:CR33393	0.582736	3.54031	1	0.1646
FBgn0053357	5SrRNA:CR33357	0.457541	2.79739	0.936647	0.16356
FBgn0053363	5SrRNA-Psi:CR33363	1.03704	6.36299	1	0.16298
FBgn0034480	CG16898	0.801306	6.54772	0.146648	0.122379

## Sheet: 1MN_Vber
Gene	Symbol	Mean FPKM 1MN	Mean FPKM Vber	FDR P-value	Fold Change
FBgn0028537	CG31775	100.766	14.522	8.52087e-101	6.93889
FBgn0260954	CG42586	100.766	14.522	9.92037e-102	6.93889
FBgn0262794	CG43175	8.10142	2.35744	0.00405295	3.43654
FBgn0033830	CG10814	15.4399	5.1297	2.36404e-19	3.00991		Induced by mating
FBgn0039239	CG13641	24.3111	8.09813	1.13834e-14	3.00206		Repressed by mating
FBgn0034407	DptB	1152.53	401.088	4.12454e-51	2.87351
FBgn0004240	Dpt	748.776	265.368	1.46608e-29	2.82165
FBgn0014865	Mtk	3259.83	1187.89	4.20882e-62	2.74422
FBgn0010385	Def	10.6737	4.27429	0.000222697	2.49718
FBgn0043578	PGRP-SB1	572.045	232.197	9.61265e-49	2.46362
FBgn0023535	arg	9.84946	4.14041	9.14768e-09	2.37886
FBgn0041579	AttC	696.524	299.049	7.60781e-23	2.32913
FBgn0000279	CecC	38.4825	17.2512	0.000684286	2.23071
FBgn0010388	Dro	788.216	354.901	1.41878e-14	2.22095
FBgn0051465	CG31465	14.4089	6.52788	6.35986e-23	2.20729
FBgn0260455	CG10332	249.427	115.942	3.56118e-30	2.15131
FBgn0262569	CG43109	4.44778	2.08648	2.95626e-07	2.13171
FBgn0030073	CG10962	44.1452	20.8102	1.38332e-10	2.12133
FBgn0038074	CG6188	94.1531	44.7247	4.36783e-31	2.10517
FBgn0035806	PGRP-SD	66.0319	32.1079	1.71469e-16	2.05656
FBgn0052185	edin	46.2718	22.7232	0.00014102	2.03633
FBgn0046876	Obp83ef	20.0869	9.98769	8.49735e-10	2.01116
FBgn0039685	Obp99b	30.0989	15.108	9.31811e-05	1.99225
FBgn0037396	CG11459	19.803	10.4935	1.42766e-08	1.88717
FBgn0037167	CG11425	20.5017	11.3023	2.07779e-09	1.81394
FBgn0000276	CecA1	59.5151	32.9396	0.00232662	1.80679
FBgn0053092	P5CDh2	16.3604	9.13408	2.89042e-17	1.79113
FBgn0261989	CG42807	27.215	15.2275	1.88842e-11	1.78722
FBgn0033949	CG10131	10.904	6.1947	0.00102123	1.76022
FBgn0013949	Ela	128.322	74.4237	4.49138e-25	1.7242
FBgn0000277	CecA2	51.9614	30.6373	0.00352074	1.69602
FBgn0046878	Obp83cd	11.4651	6.76708	0.00309808	1.69425
FBgn0262881	CG43236	95.0718	56.9703	1.61433e-06	1.66879
FBgn0051159	EF-G2	2.65882	1.60303	0.0498585	1.65862
FBgn0014859	Hr38	3.37637	2.05147	1.03284e-05	1.64583
FBgn0012042	AttA	98.7963	60.3103	1.83629e-05	1.63813
FBgn0036622	CG4753	16.0057	9.7957	0.000598956	1.63395
FBgn0033502	CG12910	6.34773	3.90437	0.0329095	1.6258
FBgn0039094	CG10184	27.6675	17.2492	3.45682e-06	1.60399
FBgn0040609	CG3348	56.7523	35.4123	1.7529e-06	1.60262
FBgn0034390	CG15093	72.8264	45.6881	9.08468e-10	1.59399
FBgn0032322	CG16743	76.1482	47.9116	5.45331e-13	1.58935
FBgn0034010	CG8157	17.7291	11.1746	0.00160494	1.58656
FBgn0041581	AttB	98.0472	62.2196	8.00575e-05	1.57583
FBgn0026403	Ndg	16.7022	10.6979	5.41905e-10	1.56127
FBgn0032262	CG7384	8.34882	5.40276	0.000254203	1.54529
FBgn0032773	fon	224.108	145.661	6.93658e-18	1.53856
FBgn0053105	p24-2	11.237	7.35403	0.0324035	1.52801
FBgn0036551	CG17029	14.3224	9.39516	0.0192027	1.52444
FBgn0011296	l(2)efl	65.6692	43.5322	2.33586e-08	1.50852
FBgn0035948	CG5644	4.2536	2.82377	0.0156561	1.50635
FBgn0035911	CG6638	13.9051	9.34923	4.4535e-05	1.4873
FBgn0260746	Ect3	31.0575	20.8961	3.27285e-07	1.48628
FBgn0034741	CG4269	24.7069	16.8203	0.0270643	1.46887
FBgn0037801	CG3999	18.5849	12.6836	5.45283e-06	1.46527
FBgn0014455	Ahcy13	64.858	44.3067	4.00072e-11	1.46384
FBgn0011722	Tig	39.891	27.4109	6.07476e-15	1.45529
FBgn0038467	CG3590	20.1384	13.9848	5.1045e-05	1.44002
FBgn0033226	CG1882	25.0142	17.68	0.00955037	1.41483
FBgn0039241	CG11089	90.5192	64.3524	1.22675e-11	1.40662
FBgn0034858	eIF2B-delta	9.82817	7.00243	0.0353158	1.40354
FBgn0033065	Cyp6w1	122.09	87.1905	7.85847e-11	1.40026
FBgn0000052	ade2	36.2396	25.9326	2.42442e-12	1.39745
FBgn0024957	Irp-1B	57.9498	41.8412	6.58091e-08	1.38499
FBgn0032945	CG8665	19.0368	13.7707	1.00957e-06	1.38241
FBgn0264386	Ca-alpha1T	23.8342	17.2417	7.99752e-09	1.38236
FBgn0086450	su(r)	33.7	24.4002	2.21371e-07	1.38114
FBgn0036337	CG11255	60.3816	43.8589	1.51691e-06	1.37672
FBgn0041607	asparagine-synthetase	51.4644	37.4161	1.59532e-07	1.37546
FBgn0033730	Cpr49Ag	36.8588	26.8028	0.00494855	1.37518
FBgn0036997	CG5955	36.7072	26.6937	0.000350325	1.37513
FBgn0015781	P5cr	16.9247	12.3114	0.0224463	1.37472
FBgn0019952	Orct	13.9394	10.1413	4.82185e-07	1.37451
FBgn0002528	LanB2	15.1703	11.0617	2.16509e-05	1.37142
FBgn0028360	l(1)G0148	19.931	14.538	0.000658372	1.37096
FBgn0039564	CG5527	8.9461	6.53143	0.00222338	1.3697
FBgn0005391	Yp2	15189.4	11149.2	1.79367e-08	1.36238
FBgn0038914	fit	1674.47	1229.49	4.81939e-06	1.36192
FBgn0037906	PGRP-LB	13.4305	9.92276	0.0274694	1.35351
FBgn0037635	CG9837	36.6708	27.131	0.00160904	1.35162
FBgn0085195	CG34166	941.935	699.272	2.22549e-07	1.34702
FBgn0035189	CG9119	40.401	30.0546	0.00571865	1.34425
FBgn0003308	ry	13.2868	9.9023	7.679e-06	1.34178
FBgn0036302	sowah	9.21339	6.86776	0.00611853	1.34154
FBgn0052506	CG32506	7.15156	5.33753	0.00196617	1.33986
FBgn0014903	CG14630	27.3722	20.4447	0.00146084	1.33884
FBgn0004654	Pgd	59.3151	44.3341	0.000392564	1.33791
FBgn0069242	eca	26.7263	20.011	0.000525561	1.33558
FBgn0022160	Gpo-1	40.8307	30.6585	1.42766e-08	1.33179
FBgn0053182	Kdm4B	12.6717	9.54221	0.0235523	1.32796
FBgn0040582	CG5791	161.567	121.748	0.000484919	1.32706
FBgn0083984	CG34148	13.4777	10.2085	0.00418381	1.32024
FBgn0023549	Mct1	10.2277	7.76695	0.00631075	1.31682
FBgn0013995	Calx	27.227	20.6966	0.000598956	1.31553
FBgn0040637	CG11458	46.8939	35.7796	0.0101614	1.31063
FBgn0000565	Eip71CD	47.1329	36.1839	0.000254458	1.30259
FBgn0031260	Spp	35.8268	27.5486	3.89126e-05	1.30049
FBgn0035041	CG13594	6.21932	4.7874	0.0445959	1.2991
FBgn0051324	CG31324	24.5642	18.9241	0.00359353	1.29804
FBgn0003965	v	47.1509	36.3828	0.00443149	1.29597
FBgn0038652	CG7720	10.1915	7.89224	0.000684286	1.29134
FBgn0038165	Task6	13.6802	10.6098	0.0404983	1.28939
FBgn0032136	Apoltp	104.882	81.6145	9.42693e-10	1.28509
FBgn0031801	CG9498	48.2909	37.6081	1.08923e-05	1.28405
FBgn0043799	CG31381	1.81264	1.41383	1.22675e-11	1.28208
FBgn0036857	CG9629	25.5905	19.9866	0.01789	1.28038
FBgn0010591	Sply	30.235	23.6252	0.00110979	1.27978
FBgn0011286	Rya-r44F	10.6994	8.36968	4.08987e-05	1.27836
FBgn0262593	Shab	38.6853	30.2997	9.71953e-06	1.27676
FBgn0031805	CG9505	10.9078	8.5657	0.00438126	1.27343
FBgn0039536	CG18437	20.3335	15.9898	0.000744233	1.27166
FBgn0038980	oa2	12.307	9.69756	0.037482	1.26908
FBgn0040340	TRAM	44.0295	34.7529	0.000291498	1.26693
FBgn0025687	LKR	11.9633	9.44901	0.0269912	1.2661
FBgn0039647	CG14509	34.2993	27.1033	0.00638116	1.2655
FBgn0037705	mura	33.0413	26.1407	1.83629e-05	1.26398
FBgn0263257	cngl	33.6477	26.629	9.17761e-05	1.26357
FBgn0022355	Tsf1	1536.26	1216.51	0.000291498	1.26284
FBgn0052432	CG32432	22.0857	17.5254	0.0187985	1.26022
FBgn0053513	Nmdar2	4.60521	3.66189	0.016761	1.2576
FBgn0085434	NaCP60E	36.8963	29.3539	1.71613e-05	1.25694
FBgn0031461	daw	31.358	24.9822	3.90075e-05	1.25522
FBgn0262483	Rbp	27.1284	21.6555	0.000186629	1.25273
FBgn0044812	TotC	82.4274	65.8305	0.0103349	1.25212
FBgn0033339	sec31	15.7783	12.616	0.00397285	1.25066
FBgn0038693	unc79	30.8545	24.699	0.000525253	1.24922
FBgn0004575	Syn	62.9933	50.4492	3.79309e-06	1.24865
FBgn0265296	Dscam2	28.0228	22.4508	0.00203112	1.24819
FBgn0024963	GluClalpha	36.5133	29.2758	0.000684286	1.24722
FBgn0000046	Act87E	48.753	39.2167	0.0205128	1.24317
FBgn0000053	ade3	46.6381	37.6006	2.27463e-06	1.24036
FBgn0037976	Tk	19.3573	15.639	0.0245517	1.23776
FBgn0001991	Ca-alpha1D	17.2162	13.9404	1.48541e-06	1.23498
FBgn0262730	CG14446	28.5508	23.1265	0.00146084	1.23455
FBgn0086677	jeb	28.0912	22.7732	0.000393727	1.23352
FBgn0002789	Mp20	134.613	109.201	0.000152133	1.23271
FBgn0002917	na	10.4406	8.48428	0.00840831	1.23058
FBgn0036975	CG5618	76.9096	62.5394	0.000255235	1.22978
FBgn0086357	Sec61alpha	136.143	110.711	0.00119578	1.22971
FBgn0261698	CG42732	14.9439	12.1611	0.0121468	1.22883
FBgn0037521	CG2993	29.6105	24.0996	0.0345765	1.22867
FBgn0031065	CG14234	6.18723	5.04009	0.0394124	1.2276
FBgn0030482	CG1673	43.2833	35.2809	2.95115e-05	1.22682
FBgn0037698	CG16779	14.1942	11.5761	0.00205285	1.22616
FBgn0032198	eEF1delta	165.319	134.831	0.00257366	1.22612
FBgn0263083	CG43351	237.024	193.49	0.00435489	1.22499
FBgn0023531	CG32809	26.3773	21.5463	0.000121223	1.22422
FBgn0000247	ca	6.84504	5.59807	0.0420386	1.22275
FBgn0036547	CG17032	52.4824	42.931	0.0359518	1.22248
FBgn0038975	Nrx-1	24.2104	19.8118	8.83506e-05	1.22202
FBgn0035713	velo	13.3101	10.9073	0.0341538	1.22029
FBgn0051550	CG31550	25.861	21.2644	0.00969181	1.21617
FBgn0030600	hiw	7.22576	5.94918	0.00713361	1.21458
FBgn0259246	brp	41.5732	34.2335	0.00204351	1.2144
FBgn0039023	CG4723	11.7672	9.69019	0.0472712	1.21435
FBgn0003301	rut	21.2286	17.4911	0.00011656	1.21368
FBgn0026562	BM-40-SPARC	163.328	134.758	0.00237968	1.21201
FBgn0053547	Rim	26.4849	21.8522	8.48351e-05	1.212
FBgn0005278	Sam-S	168.445	139.002	0.000116262	1.21182
FBgn0264606	Fife	18.3053	15.1097	0.0235944	1.21149
FBgn0260941	app	33.3301	27.5431	0.00806406	1.2101
FBgn0053138	AGBE	46.164	38.1502	0.00118632	1.21006
FBgn0047135	CG32276	255.981	212.132	0.000277495	1.2067
FBgn0016081	fry	14.242	11.8029	0.00161438	1.20666
FBgn0011571	caz	37.9354	31.4432	0.0340781	1.20648
FBgn0027835	Dp1	89.4092	74.1601	0.000490963	1.20562
FBgn0029761	SK	46.112	38.2493	0.00133639	1.20556
FBgn0265356	tn	18.4404	15.3154	0.00213159	1.20404
FBgn0037010	CG4825	34.2306	28.4557	0.00736286	1.20294
FBgn0032482	Pect	92.5454	77.0156	0.000468083	1.20164
FBgn0004885	tok	33.4407	27.8502	0.000286978	1.20073
FBgn0001257	ImpL2	61.347	51.1433	0.00350662	1.19951
FBgn0063491	GstE9	99.5558	83.0594	0.0490238	1.19861
FBgn0263321	CG43402	97.0734	81.0021	0.0471548	1.19841
FBgn0034501	CG13868	176.001	147.052	5.33244e-06	1.19686
FBgn0263220	Hk	46.2304	38.6469	0.0271111	1.19623
FBgn0259240	Ten-a	24.929	20.8463	0.00611853	1.19585
FBgn0011016	SsRbeta	86.7604	72.598	0.0263606	1.19508
FBgn0264255	para	46.813	39.1897	0.00161766	1.19452
FBgn0261928	CG42795	25.6122	21.4442	0.000422746	1.19437
FBgn0052529	Hers	16.9571	14.2125	0.0146663	1.19311
FBgn0263131	CG43373	4.28563	3.59413	0.00611853	1.1924
FBgn0010473	tutl	43.4759	36.4651	0.0131707	1.19226
FBgn0000409	Cyt-c-p	241.918	202.932	0.00730773	1.19211
FBgn0030262	Vago	79.4844	66.683	0.00329882	1.19197
FBgn0000210	br	7.04662	5.94192	0.00443149	1.18592
FBgn0086911	rg	28.6183	24.1342	0.0063636	1.1858
FBgn0031390	tho2	9.21574	7.77364	0.0420154	1.18551
FBgn0004652	fru	23.6706	19.9688	0.0088952	1.18538
FBgn0033108	CG15236	17.6489	14.8928	0.0145114	1.18506
FBgn0263980	CG43729	32.3873	27.3651	0.000405667	1.18353
FBgn0052677	X11Lbeta	16.9871	14.362	0.0300615	1.18278
FBgn0053558	mim	19.7418	16.7002	0.0079366	1.18213
FBgn0010470	Fkbp13	72.999	61.7886	0.00940397	1.18143
FBgn0028543	NimB2	96.5991	81.9401	0.0127939	1.1789
FBgn0030412	tomosyn	45.8965	38.9685	0.0122209	1.17779
FBgn0261573	CoRest	12.3654	10.5162	0.0445886	1.17583
FBgn0264449	CG43867	12.4239	10.5676	0.0414015	1.17566
FBgn0000464	Lar	24.8343	21.2098	0.0152277	1.17089
FBgn0263456	nwk	51.6518	44.1292	0.000825903	1.17047
FBgn0085447	sif	98.6957	84.3644	0.0474098	1.16987
FBgn0026575	hang	11.3987	9.74532	0.0243649	1.16965
FBgn0038256	CG7530	20.0307	17.1466	0.0459836	1.1682
FBgn0263354	CG42784	32.9843	28.2675	0.0203089	1.16686
FBgn0020513	ade5	322.541	276.559	9.66223e-05	1.16627
FBgn0028704	Nckx30C	69.5147	59.6084	0.0260045	1.16619
FBgn0039688	Kul	15.6261	13.4009	0.0445198	1.16605
FBgn0030674	CG8184	12.3766	10.6486	0.0283904	1.16227
FBgn0261549	rdgA	102.219	87.9744	0.0340863	1.16191
FBgn0001142	Gs1	99.4393	85.6045	0.00164029	1.16161
FBgn0030737	CG9914	126.846	109.24	0.0243268	1.16117
FBgn0031417	CG3597	92.3608	79.8728	0.0184866	1.15635
FBgn0004045	Yp1	29142.1	25239.6	0.0252237	1.15462
FBgn0032382	Mal-B2	52.0544	45.1221	0.0131241	1.15363
FBgn0001098	Gdh	104.629	90.7904	0.0136201	1.15243
FBgn0026576	CG5991	121.201	105.285	0.0292878	1.15118
FBgn0027579	CG5508	53.2245	46.2495	0.0026852	1.15081
FBgn0030706	CG8909	16.1708	14.0517	0.00443149	1.15081
FBgn0040735	CG16836	370.955	322.382	0.0253647	1.15067
FBgn0033366	Ance-4	56.7267	49.3052	0.00981135	1.15052
FBgn0003380	Sh	83.1924	72.3294	0.00424473	1.15019
FBgn0020385	pug	109.274	95.0987	0.0171925	1.14906
FBgn0052190	NUCB1	87.5046	76.2467	0.00405295	1.14765
FBgn0028396	TotA	274.446	239.21	0.0235944	1.1473
FBgn0053988	CG33988	18.5444	16.1661	0.0409374	1.14712
FBgn0014863	Mlp84B	85.336	74.4792	0.0244476	1.14577
FBgn0259210	prom	15.0211	13.1198	0.015259	1.14492
FBgn0262109	CR42862	427.647	373.668	0.000850727	1.14446
FBgn0027073	CG4302	40.8953	35.7671	0.00503217	1.14338
FBgn0030425	CG3775	60.9601	53.3358	0.0267764	1.14295
FBgn0053208	Mical	17.6457	15.4899	0.0100049	1.13917
FBgn0004242	Syt1	155.213	136.396	0.0185439	1.13796
FBgn0026375	RhoGAPp190	28.3929	24.9818	0.00918465	1.13654
FBgn0003149	Prm	58.9364	51.908	0.0185106	1.1354
FBgn0000667	Actn	34.3166	30.2653	0.0283904	1.13386
FBgn0261244	inaE	13.515	11.9228	0.00802662	1.13354
FBgn0032726	CG10621	154.027	136.013	0.0165479	1.13244
FBgn0035720	CG10077	222.704	196.746	0.011909	1.13194
FBgn0034753	CG2852	140.751	124.403	0.0283541	1.13142
FBgn0003638	su(w[a])	42.2097	37.314	0.0121468	1.1312
FBgn0032904	Mtp	54.9786	48.6617	0.0185439	1.12981
FBgn0261551	CG42669	35.0026	31.0815	0.0147436	1.12616
FBgn0032797	CG10186	93.1525	82.7498	0.00673697	1.12571
FBgn0031037	CG14207	103.409	91.8849	0.0495201	1.12541
FBgn0005666	bt	43.0428	38.286	0.00658866	1.12424
FBgn0010222	Nmdmc	66.2163	59.1161	0.00729358	1.12011
FBgn0264384	CR43836	2.60019	2.36603	0.0177551	1.09897
FBgn0053229	CG33229	15.9755	15.1271	0.00394259	1.05609
FBgn0085773	CR40766	3114.93	3225.95	0.02614	0.965583
FBgn0044510	mRpS5	46.596	48.8825	0.0368199	0.953226
FBgn0083121	Uhg7	5.09434	5.3727	0.0492663	0.948189
FBgn0085827	CR41621	1749.57	1860.59	0.0199015	0.940333
FBgn0001234	Hsromega	103.7	110.451	1.75828e-08	0.938881
FBgn0085797	CR41540	7580.84	8130.85	0.027753	0.932355
FBgn0085770	CR40734	2708.16	2928.3	0.037765	0.924824
FBgn0085753	CR40596	516.02	558.507	0.0153139	0.923926
FBgn0085769	CR40728	2587.98	2805.05	0.00713361	0.922615
FBgn0085819	CR41609	4466.52	4856.64	0.00250309	0.919672
FBgn0085779	CR40963	636.494	698.933	0.00713361	0.910665
FBgn0004828	His3.3B	405.605	445.416	0.0329922	0.910621
FBgn0026439	Eaat1	81.4146	89.9088	0.0158892	0.905524
FBgn0002868	MtnA	643.391	713.868	0.0414015	0.901274
FBgn0085802	CR41548	2606.84	2895.5	0.0031258	0.900307
FBgn0039857	RpL6	809.771	903.448	0.00713361	0.896312
FBgn0085823	CR41617	4653.46	5210.08	0.00114972	0.893165
FBgn0085813	CR41602	1768.07	1984.61	0.000825903	0.890889
FBgn0085799	CR41544	1753.88	1970.25	7.15817e-05	0.890182
FBgn0001942	eIF-4a	610.75	686.369	0.0097002	0.889827
FBgn0036862	Gbs-76A	25.8427	29.0429	0.0390374	0.88981
FBgn0031914	CG5973	80.0533	90.0471	0.0498585	0.889016
FBgn0000592	Est-6	207.861	233.86	0.0359518	0.888825
FBgn0085768	CR40712	4938.36	5556.41	0.000744233	0.888768
FBgn0085815	CR41605	1533.1	1725.42	0.00068103	0.888537
FBgn0261504	7SLRNA:CR42652	969.058	1092.3	0.00709575	0.887174
FBgn0030421	CG3812	25.2916	28.55	0.037765	0.885869
FBgn0035906	GstO2	41.9499	47.375	0.0204957	0.885487
FBgn0000003	7SLRNA:CR32864	972.965	1099.48	0.00662328	0.884933
FBgn0085828	CR42195	1537.9	1740.72	0.000581772	0.883483
FBgn0029801	CG15771	28.5542	32.3244	0.037765	0.883364
FBgn0085771	CR40741	1436.24	1627.19	8.8097e-05	0.88265
FBgn0085757	CR40621	4079.84	4625.61	0.000128641	0.882011
FBgn0010548	Aldh-III	63.6554	72.1947	0.043142	0.881718
FBgn0026262	bip2	36.4414	41.4462	0.0414015	0.879247
FBgn0004432	Cyp1	282.122	321.922	0.00657794	0.876367
FBgn0038476	kuk	19.2141	21.9581	0.0260641	0.875035
FBgn0030136	RpS28b	830.716	950.369	0.0149974	0.874098
FBgn0032949	Lamp1	177.419	202.988	0.0345517	0.874038
FBgn0004403	RpS14a	527.995	604.456	0.0332424	0.873504
FBgn0034405	Jheh2	55.2498	63.4452	0.0253234	0.870826
FBgn0004513	Mdr65	12.2076	14.0283	0.0354708	0.870215
FBgn0037387	CG1213	58.7805	67.582	0.0418102	0.869766
FBgn0015766	Msr-110	418.221	481.071	0.0028924	0.869354
FBgn0085742	CR40546	3509.09	4039.62	7.98535e-05	0.868669
FBgn0010435	emp	79.7828	91.8967	0.00660667	0.868179
FBgn0085759	CR40640	2601.63	2999.65	1.49988e-06	0.86731
FBgn0025683	CG3164	202.145	233.147	0.00131837	0.867027
FBgn0036433	CG9628	53.007	61.1432	0.0122209	0.866932
FBgn0033304	Cyp6a13	19.0944	22.0338	0.0404983	0.866597
FBgn0085807	CR41590	2537.68	2930.12	8.04015e-05	0.866068
FBgn0086687	desat1	951.661	1098.96	0.0359033	0.865968
FBgn0030608	Lsd-2	197.214	228.157	0.027753	0.864377
FBgn0085777	CR40959	1495.99	1732.13	2.85259e-05	0.863674
FBgn0085760	CR40641	1305.31	1513.05	1.32798e-05	0.862697
FBgn0037288	CG14661	114.564	133.061	0.0279246	0.860991
FBgn0038733	CG11407	22.9412	26.6652	0.0160678	0.860344
FBgn0028526	CG15293	357.877	416.001	0.00611853	0.86028
FBgn0040775	CG12158	565.666	658.869	0.0254069	0.858541
FBgn0035811	CG12262	108.806	126.78	0.0443702	0.858222
FBgn0085737	CR40502	1171.11	1364.69	0.000518145	0.858151
FBgn0031478	CG8814	22.3834	26.1091	0.0274605	0.857301
FBgn0028480	CG17841	132.952	155.17	0.00223783	0.856817
FBgn0260799	p120ctn	49.3183	57.6689	0.0466294	0.855199
FBgn0038236	Cyp313a1	40.3438	47.1771	0.0352266	0.855156
FBgn0085822	CR41613	1523.77	1783.34	6.01055e-06	0.854451
FBgn0031734	CG11147	37.6358	44.0713	0.02476	0.853976
FBgn0037643	skap	167.91	196.667	0.0305374	0.853775
FBgn0261862	whd	75.8894	88.912	0.0211883	0.853534
FBgn0052726	CG32726	60.1841	70.5129	0.0234517	0.853519
FBgn0085761	CR40642	1536.41	1801.03	5.30815e-06	0.853073
FBgn0050359	Mal-A5	32.6559	38.3599	0.0447831	0.851304
FBgn0039048	CG17111	12.3628	14.5263	0.0156212	0.851061
FBgn0013688	mt:srRNA	89.2337	104.873	0.00100299	0.850872
FBgn0085774	CR40779	4817.69	5663.5	4.41882e-06	0.850655
FBgn0029608	CG3091	44.1909	51.9704	0.0400125	0.850309
FBgn0003248	Rh2	65.6593	77.4205	0.0132135	0.848087
FBgn0085795	CR41535	2143.4	2529.42	2.06884e-06	0.84739
FBgn0025592	Gyk	27.5401	32.5095	0.0323198	0.84714
FBgn0085796	CR41539	1845.09	2178.24	2.67032e-06	0.847054
FBgn0038034	Cyp9f3Psi	8.82925	10.4267	0.0368759	0.84679
FBgn0004364	18w	12.729	15.0458	0.0390374	0.846017
FBgn0260745	mfas	47.2389	55.8887	0.0108142	0.845231
FBgn0016797	fz2	23.8815	28.2703	0.0235944	0.844756
FBgn0035904	GstO3	40.2163	47.6774	0.00466965	0.843509
FBgn0085758	CR40639	1516.02	1799.95	2.25036e-06	0.84226
FBgn0016726	RpL29	1031.75	1225.47	0.00762926	0.841919
FBgn0013679	mt:ND1	1689.38	2011.26	0.00830568	0.839958
FBgn0000261	Cat	96.9081	115.699	0.00984736	0.837588
FBgn0031220	CG4822	27.7576	33.1808	0.00344799	0.836556
FBgn0085817	CR41607	1387.71	1659.05	1.83383e-06	0.836449
FBgn0039114	Lsd-1	90.2381	108.055	0.00116358	0.835115
FBgn0085810	CR41597	15.2473	18.2674	0.0400125	0.834672
FBgn0033373	CG8080	15.0961	18.1445	0.0244476	0.831992
FBgn0025814	Mgstl	96.509	116.095	0.00292645	0.831296
FBgn0013686	mt:lrRNA	20957.6	25218.2	0.000405667	0.831052
FBgn0026314	Ugt35b	19.6031	23.6028	0.027753	0.830544
FBgn0001977	l(2)35Bg	17.9088	21.5735	0.0134908	0.830127
FBgn0031449	CG31689	68.9446	83.4137	0.00057906	0.826538
FBgn0003748	Treh	68.101	82.4993	2.57234e-05	0.825474
FBgn0032494	CG5945	117.722	142.622	1.01152e-05	0.825417
FBgn0004629	Cys	221.471	268.477	0.00713361	0.824914
FBgn0010053	Jheh1	37.5397	45.5096	0.021436	0.824873
FBgn0085764	CR40668	1744.09	2116.87	3.1913e-07	0.823901
FBgn0052407	CG32407	18.3387	22.2597	0.0476885	0.823851
FBgn0000477	DNaseII	54.154	65.8339	0.014072	0.822586
FBgn0053494	CG33494	32.2625	39.2918	0.0203089	0.821099
FBgn0033017	CG10465	24.1943	29.4834	0.00918465	0.820608
FBgn0000459	disco	12.5719	15.3538	0.0445959	0.818814
FBgn0041180	Tep4	63.2944	77.3226	0.00224395	0.818576
FBgn0034162	CG6426	138.304	169.215	0.000697915	0.817327
FBgn0032400	CG6770	849.1	1039.82	2.56427e-05	0.816583
FBgn0027932	Akap200	51.2322	62.7446	6.35605e-05	0.81652
FBgn0260228	CG42502	731.258	897.28	5.73713e-06	0.814972
FBgn0039958	CG12567	14.7481	18.0976	0.00814006	0.814924
FBgn0261639	CR42722	19.9601	24.5539	0.00954358	0.812907
FBgn0032897	CG9336	227.714	280.602	2.90793e-05	0.811518
FBgn0053926	CG33926	27.4387	33.8364	0.00231533	0.810923
FBgn0053403	5SrRNA:CR33403	2.14385	2.64608	0.0122209	0.810198
FBgn0264922	smt3	67.5957	83.4978	0.0203089	0.809551
FBgn0243514	eater	6.13036	7.58267	0.00939053	0.80847
FBgn0027562	CG10345	29.5488	36.5717	0.00343489	0.80797
FBgn0013772	Cyp6a8	9.89461	12.2736	0.043142	0.806168
FBgn0040260	Ugt36Bc	15.2968	18.9889	0.00223657	0.805565
FBgn0037090	Est-Q	24.3575	30.2508	0.0226619	0.805185
FBgn0034142	CG8306	19.5582	24.3034	0.00673697	0.804751
FBgn0261640	CR42723	20.0416	24.9118	0.0116205	0.804505
FBgn0036926	CG7646	42.9718	53.5469	0.027753	0.802508
FBgn0053978	CG33978	4.86281	6.06804	0.00983122	0.80138
FBgn0034229	CG4847	149.994	187.188	0.000152133	0.801302
FBgn0033067	CG11211	114.28	142.767	0.00043469	0.800468
FBgn0030013	GIIIspla2	21.0911	26.3861	0.00322393	0.799327
FBgn0053080	CG33080	14.3494	17.9579	0.0341538	0.799058
FBgn0032297	CG17124	63.081	79.0412	2.90793e-05	0.798077
FBgn0030816	CG16700	8.16051	10.2255	0.00940397	0.798052
FBgn0053425	5SrRNA:CR33425	2.22389	2.79044	0.0251526	0.796966
FBgn0027341	Gfat1	17.8858	22.5014	0.0121468	0.794874
FBgn0053413	5SrRNA:CR33413	2.22389	2.79961	0.00371223	0.794355
FBgn0029765	CG16756	60.3379	76.021	0.0199436	0.793701
FBgn0033875	CG6357	89.6898	113.015	0.0400125	0.793611
FBgn0053434	5SrRNA:CR33434	2.34314	2.95281	0.0110614	0.793527
FBgn0032008	CG14277	94.4925	119.169	0.00161766	0.792926
FBgn0050295	Ipk1	3.33353	4.20833	0.0234517	0.792127
FBgn0038037	Cyp9f2	51.4496	65.0751	3.90075e-05	0.790619
FBgn0035103	Vdup1	12.0093	15.2084	0.0225554	0.789652
FBgn0031942	CG7203	50.9903	64.598	0.0179008	0.789348
FBgn0029092	ced-6	58.365	74.0504	9.71953e-06	0.78818
FBgn0030895	CG7135	10.6003	13.4495	0.0260045	0.788159
FBgn0035290	CG1887	44.7606	56.8333	6.40664e-07	0.787577
FBgn0039678	Obp99a	277.575	353.056	0.0225257	0.786207
FBgn0030196	Psf3	35.3709	45.0336	0.000490963	0.785434
FBgn0261990	CG42808	39.808	50.7431	0.0220722	0.7845
FBgn0033093	CG3270	5.86872	7.49119	0.0447831	0.783417
FBgn0025827	CG6421	40.8218	52.1768	0.000118123	0.782375
FBgn0053384	5SrRNA:CR33384	2.22116	2.84683	0.00258268	0.78022
FBgn0030828	CG5162	23.4799	30.1716	8.41569e-05	0.77821
FBgn0036587	CG4950	12.3761	15.9266	0.0198938	0.777071
FBgn0039914	mav	9.50281	12.2485	0.00197939	0.775837
FBgn0038147	CCHa2	87.1876	112.811	0.000292822	0.772861
FBgn0053436	5SrRNA:CR33436	2.27312	2.95546	0.0137607	0.769125
FBgn0027586	CG5867	76.0658	98.9	5.73713e-06	0.769119
FBgn0003189	r	4.74088	6.16481	0.000507272	0.769022
FBgn0011705	rost	64.8606	84.3445	0.000118726	0.768996
FBgn0053377	5SrRNA:CR33377	1.85903	2.42402	0.0159159	0.766922
FBgn0038198	Npc2b	76.9	100.292	4.32671e-05	0.766763
FBgn0032603	CG17928	25.8767	33.9667	0.0362413	0.761826
FBgn0053388	5SrRNA:CR33388	2.16426	2.84622	0.00984736	0.7604
FBgn0085744	CR40561	2.16262	2.8447	0.00256778	0.76023
FBgn0037788	CG3940	29.0783	38.4011	4.75537e-05	0.757226
FBgn0025595	AkhR	31.919	42.1663	6.42875e-08	0.756979
FBgn0043792	CG30427	7.60794	10.0628	0.0122452	0.756045
FBgn0051313	CG31313	86.5465	114.481	9.43042e-05	0.755992
FBgn0036428	CG9238	97.8233	129.428	7.77422e-08	0.755811
FBgn0085360	CG34331	59.2083	78.351	7.37991e-05	0.75568
FBgn0053374	5SrRNA:CR33374	2.09205	2.76945	0.023014	0.755403
FBgn0035434	Drsl5	104.938	139.243	7.23352e-05	0.753634
FBgn0039084	CG10175	10.8284	14.3889	0.0248797	0.752555
FBgn0053387	5SrRNA:CR33387	2.27039	3.03515	0.00161766	0.74803
FBgn0034076	Jhedup	7.14675	9.59522	0.00695371	0.744824
FBgn0053429	5SrRNA:CR33429	1.9254	2.58672	0.00438126	0.744342
FBgn0034438	CG9416	6.47924	8.72729	0.00294375	0.742412
FBgn0036106	CG6409	342.854	461.89	2.12266e-09	0.742285
FBgn0053368	5SrRNA:CR33368	2.08249	2.82088	0.00133639	0.738241
FBgn0053362	5SrRNA:CR33362	2.04411	2.7783	0.00868014	0.735742
FBgn0034646	Rae1	5.87106	7.98214	0.0270659	0.735525
FBgn0053386	5SrRNA:CR33386	2.10419	2.86097	0.00547178	0.735481
FBgn0263336	CR43417	8.63453	11.7805	0.00148638	0.732949
FBgn0038214	CG9616	32.4786	44.538	0.00120594	0.729234
FBgn0051205	CG31205	86.4704	118.739	1.01711e-05	0.728239
FBgn0013771	Cyp6a9	12.6547	17.3842	0.000353283	0.727945
FBgn0259682	Jabba	82.328	113.151	1.21021e-11	0.727597
FBgn0038820	CG4000	59.5032	81.9335	4.78141e-08	0.726237
FBgn0053433	5SrRNA:CR33433	2.15752	2.97082	0.000354079	0.726236
FBgn0028491	CG2930	4.63354	6.3812	0.0499703	0.726124
FBgn0003067	Pepck	417.928	576.634	7.85847e-11	0.724771
FBgn0261362	proPO-A1	16.1916	22.3452	0.0280414	0.724613
FBgn0037612	CG8112	9.42821	13.0198	0.013053	0.724142
FBgn0262353	CR43051	59.1275	81.9186	0.000938898	0.721784
FBgn0039611	CG14528	18.4639	25.5835	6.12438e-07	0.721713
FBgn0034509	Obp57c	123.942	171.994	1.48349e-06	0.720619
FBgn0053396	5SrRNA:CR33396	2.23806	3.11749	0.000417068	0.717904
FBgn0032835	CG16772	129.749	180.88	6.5192e-05	0.717321
FBgn0038610	CG7675	16.5589	23.0904	0.000243152	0.717134
FBgn0003390	shf	7.00466	9.78274	3.23488e-05	0.716023
FBgn0026315	Ugt35a	6.76322	9.44794	0.00837974	0.71584
FBgn0053445	5SrRNA:CR33445	1.75063	2.44827	0.00200364	0.71505
FBgn0053446	5SrRNA:CR33446	2.3171	3.24087	0.00110433	0.714963
FBgn0053381	5SrRNA:CR33381	2.27941	3.18868	0.0015292	0.714844
FBgn0032213	CG5390	67.5005	94.4606	6.02357e-08	0.714589
FBgn0041713	yellow-c	6.36297	8.91438	0.000320733	0.713787
FBgn0053426	5SrRNA:CR33426	2.20924	3.11097	9.40992e-05	0.710145
FBgn0053430	5SrRNA:CR33430	1.94353	2.74024	0.00192355	0.709256
FBgn0053358	5SrRNA:CR33358	2.25697	3.18277	0.000979258	0.709121
FBgn0053357	5SrRNA:CR33357	1.97439	2.79739	0.00469331	0.705797
FBgn0035480	CG14984	17.6525	25.0391	0.00192318	0.704998
FBgn0037877	CG6689	6.44626	9.14451	0.00148213	0.704932
FBgn0053397	5SrRNA:CR33397	2.01757	2.8734	0.00060278	0.702154
FBgn0053404	5SrRNA:CR33404	1.81526	2.58672	6.63302e-05	0.701764
FBgn0042119	Cpr65Au	97.1301	139.006	9.94447e-09	0.698748
FBgn0040099	lectin-28C	78.7474	112.743	2.00051e-11	0.698466
FBgn0053373	5SrRNA:CR33373	2.01301	2.88257	5.67427e-05	0.69834
FBgn0004186	snRNA:U1:95Cb	13.4597	19.3235	0.0137607	0.696547
FBgn0053431	5SrRNA:CR33431	2.00238	2.8751	2.89146e-05	0.696456
FBgn0037697	GstZ2	10.4562	15.016	0.00611853	0.696335
FBgn0053414	5SrRNA:CR33414	1.97592	2.84154	0.00192318	0.695368
FBgn0053421	5SrRNA:CR33421	1.76148	2.53746	0.00104776	0.694189
FBgn0053379	5SrRNA:CR33379	2.12747	3.0673	4.86658e-05	0.693597
FBgn0034479	CG8654	33.3378	48.0979	2.82547e-10	0.693124
FBgn0053376	5SrRNA:CR33376	2.24057	3.2342	0.000555944	0.692775
FBgn0053370	5SrRNA:CR33370	1.84909	2.67591	0.000286978	0.691013
FBgn0003916	snRNA:U1:21D	13.7757	19.9823	0.00955037	0.689397
FBgn0004185	snRNA:U1:95Ca	13.7757	19.9823	0.00955037	0.689397
FBgn0053435	5SrRNA:CR33435	2.12693	3.08734	9.66223e-05	0.68892
FBgn0031694	Cyp4ac2	8.61006	12.5274	2.27463e-06	0.6873
FBgn0030589	CG9519	4.67955	6.81223	0.0420379	0.686934
FBgn0053392	5SrRNA:CR33392	2.13499	3.12761	0.000284381	0.682627
FBgn0053380	5SrRNA:CR33380	1.78021	2.62382	0.000915361	0.678478
FBgn0036992	CG11796	41.8797	62.0016	1.48349e-06	0.675461
FBgn0031182	Cyp6t1	10.1375	15.0146	5.63956e-05	0.675172
FBgn0052282	Drsl4	20.8389	31.2795	0.0300615	0.666217
FBgn0053394	5SrRNA:CR33394	2.19201	3.29433	5.92182e-05	0.66539
FBgn0034165	CG6435	14.8445	22.3296	0.0240153	0.664789
FBgn0015035	Cyp4e3	18.631	28.04	5.08193e-13	0.664446
FBgn0038738	CG4572	25.2659	38.1471	6.37034e-11	0.662328
FBgn0034440	CG10073	2.98352	4.51244	0.00897411	0.661177
FBgn0043535	Obp57a	51.4943	77.9838	4.21066e-07	0.660321
FBgn0053395	5SrRNA:CR33395	1.96651	2.98093	1.87409e-05	0.659697
FBgn0085756	CR40613	8.2361	12.5565	7.28832e-08	0.655923
FBgn0085752	CR40594	15.8765	24.237	4.36424e-06	0.65505
FBgn0052220	Csas	11.3395	17.3272	0.0497404	0.654436
FBgn0038381	CG3303	4.28011	6.54637	0.0112458	0.653814
FBgn0053359	5SrRNA:CR33359	2.21098	3.39501	8.02741e-06	0.651244
FBgn0053393	5SrRNA:CR33393	2.30512	3.54031	2.44612e-05	0.651106
FBgn0011283	Obp28a	16.1865	24.865	0.0080008	0.650974
FBgn0033574	Spn47C	6.30713	9.71505	0.0492155	0.649212
FBgn0034480	CG16898	4.22057	6.54772	0.0016196	0.644586
FBgn0053385	5SrRNA:CR33385	1.96022	3.05411	1.87409e-05	0.641831
FBgn0050440	CG30440	2.37032	3.70059	0.000518145	0.640525
FBgn0034468	Obp56a	14.5528	22.9555	0.000226505	0.633958
FBgn0085818	CR41608	15.9415	25.1896	1.16858e-11	0.632863
FBgn0085803	CR41550	22.0003	35.5912	4.1039e-25	0.618138
FBgn0033268	Obp44a	222.637	360.363	7.41451e-42	0.617813
FBgn0043783	CG32444	228.2	369.677	2.27627e-30	0.617296
FBgn0032266	CG18302	6.13492	10.0546	4.38832e-05	0.610161
FBgn0033500	CG12913	1.78938	3.0213	0.023243	0.592255
FBgn0053415	5SrRNA:CR33415	1.61856	2.7652	5.73713e-06	0.585332
FBgn0038299	Spn88Eb	23.1846	40.1519	0.00954358	0.577423
FBgn0002939	ninaD	1.3397	2.36984	0.0140648	0.565311
FBgn0002565	Lsp2	734.855	1318.66	5.71941e-07	0.557273
FBgn0082931	snoRNA:Me28S-G2703a	16.7468	30.1194	0.0439499	0.556013
FBgn0039666	Diedel	2.62685	4.7893	0.0455398	0.548482
FBgn0038312	CG4334	2.46173	4.52344	0.0185439	0.544216
FBgn0034187	CG6967	1.26456	2.36588	1.01711e-05	0.534498
FBgn0034253	CG10936	0.643641	1.26482	0.0228666	0.508879
FBgn0261575	tobi	122.152	241.878	3.27425e-10	0.505017
FBgn0053363	5SrRNA-Psi:CR33363	2.69617	6.36299	8.93291e-06	0.423727
FBgn0027584	CG4757	16.8259	62.5544	0.000436124	0.268981

## Sheet: 1MN_1MG
Gene	Symbol	Mean FPKM 1MG	Mean FPKM 1MN	FDR P-value	Fold change
FBgn0043799	CG31381	0.651435	1.81264	0.00220243	2.78253
FBgn0261575	tobi	51.3802	122.152	4.21869e-05	2.37742		Higher 1MN
FBgn0013276	Hsp70Ab	1.54269	3.54512	0.02855	2.29802		Higher 1MG
FBgn0013275	Hsp70Aa	1.45067	3.26902	0.0486658	2.25346
FBgn0043783	CG32444	114.764	228.2	0.0121403	1.98843
FBgn0031816	CG16947	3.78207	7.48713	0.011307	1.97964
FBgn0033442	CG1690	3.93218	7.67275	0.00497668	1.95127
FBgn0032400	CG6770	521.8	849.1	1.16476e-08	1.62725
FBgn0030073	CG10962	28.0545	44.1452	0.000281143	1.57355
FBgn0086378	Alg-2	14.1545	21.7542	0.0121403	1.53691
FBgn0040733	CG15068	492.894	745.189	2.21474e-05	1.51186
FBgn0013686	mt:lrRNA	14041	20957.6	0.000746543	1.4926
FBgn0036428	CG9238	67.1025	97.8233	0.000159755	1.45782
FBgn0013679	mt:ND1	1169.51	1689.38	0.00123775	1.44451
FBgn0025454	Cyp6g1	33.4867	47.1796	0.00222876	1.40891
FBgn0002719	Men	122.268	166.041	0.0332577	1.35801
FBgn0261560	Thor	207.045	274.622	0.00492518	1.32639
FBgn0033830	CG10814	11.9066	15.4399	0.00188633	1.29675
FBgn0029990	CG2233	2794.03	3512.45	0.000111759	1.25713
FBgn0016917	Stat92E	75.9491	91.1723	0.0301105	1.20044
FBgn0027571	CG3523	275.556	326.409	0.0122368	1.18455
FBgn0003429	slo	47.7899	56.2124	0.00980135	1.17624
FBgn0261788	Ank2	111.239	130.643	8.94896e-05	1.17444
FBgn0087002	Rfabg	2558.78	2996.32	0.0271058	1.17099
FBgn0024957	Irp-1B	50.672	57.9498	0.0297906	1.14363
FBgn0260941	app	29.5906	33.3301	0.0486658	1.12637
FBgn0086906	sls	26.8294	29.3419	0.0486658	1.09365
FBgn0005666	bt	39.6054	43.0428	0.0271058	1.08679
FBgn0085827	CR41621	2130.64	1749.57	0.000159755	0.821148
FBgn0085778	CR40962	659.238	531.02	0.0043489	0.805506
FBgn0034802	CG3800	289.308	224.842	0.0101682	0.777171
FBgn0005585	Crc	343.844	266.189	0.0486658	0.774158
FBgn0029810	CG12239	91.1593	68.3708	0.00980135	0.750014
FBgn0034654	CG10306	72.2554	53.9636	0.0486658	0.746846
FBgn0005626	ple	27.246	19.9986	0.0202376	0.734001
FBgn0040493	grsm	32.403	23.324	0.0486658	0.719808
FBgn0039801	Npc2h	73.8576	52.8804	0.0444046	0.715978
FBgn0030362	regucalcin	162.37	114.928	0.0296565	0.707816
FBgn0003137	Ppn	76.1197	53.5197	0.0296905	0.703099
FBgn0029823	CG3011	105.46	74.0485	0.016768	0.702149
FBgn0037010	CG4825	50.6378	34.2306	0.0149094	0.675988
FBgn0037632	Tcp-1eta	23.135	15.4562	0.0126023	0.668085
FBgn0020513	ade5	488.533	322.541	0.00253976	0.660223
FBgn0030593	CG9512	290.872	191.129	1.99164e-07	0.65709
FBgn0031313	CG5080	43.3279	28.0902	0.0169859	0.648315
FBgn0031497	CG17259	27.9617	18.0027	0.0146033	0.643834
FBgn0021760	chb	21.3501	13.5466	0.000123934	0.634499
FBgn0022160	Gpo-1	64.8085	40.8307	0.0150935	0.630021
FBgn0040340	TRAM	70.2436	44.0295	0.00123775	0.626811
FBgn0039241	CG11089	145.037	90.5192	0.00220243	0.624113
FBgn0000052	ade2	58.0755	36.2396	0.00123775	0.624009
FBgn0036837	CG18135	207.004	129.104	0.000559226	0.623679
FBgn0002528	LanB2	24.838	15.1703	0.000877293	0.610768
FBgn0038964	Nop56	25.0286	14.8751	0.0101803	0.594322
FBgn0036514	CG12301	6.25072	3.70004	0.0296565	0.591937
FBgn0052425	CG32425	112.662	65.7602	3.77934e-07	0.583695
FBgn0041607	asparagine-synthetase	91.9676	51.4644	7.94818e-08	0.559592
FBgn0019952	Orct	24.91	13.9394	0.0149094	0.55959
FBgn0035107	mri	13.4944	7.40579	0.0332577	0.548806
FBgn0039849	CG11334	22.2405	11.8483	0.00865158	0.532737
FBgn0010222	Nmdmc	124.877	66.2163	2.55977e-08	0.530252
FBgn0038275	CG3817	10.0181	5.1136	0.0234782	0.510436
FBgn0010651	l(2)08717	77.4039	37.9309	0.00211413	0.490038
FBgn0053092	P5CDh2	34.3085	16.3604	5.86474e-05	0.47686
FBgn0037396	CG11459	43.8431	19.803	0.00492518	0.45168
FBgn0028537	CG31775	223.569	100.766	0.0149094	0.450716
FBgn0260954	CG42586	223.569	100.766	0.0143555	0.450716
FBgn0043791	CG8147	74.5624	33.3416	5.20166e-05	0.447163
FBgn0040609	CG3348	139.79	56.7523	6.7473e-05	0.405983
FBgn0037167	CG11425	66.4491	20.5017	3.85168e-08	0.308532

## Sheet: 3FG_VFG
Gene	Symbol	Mean FPKM 3FG	Mean FPKM VFG	FDR P-value	Fold Change
FBgn0043791	CG8147	188.161	21.4292	2.66172e-27	8.7806
FBgn0033936	CG17386	8.72284	1.2359	1.02268e-33	7.05787
FBgn0037167	CG11425	30.5981	4.84037	6.01642e-20	6.32143		Induced by mating
FBgn0263408	CR43454	2.05961	0.527415	0.0197562	3.9051		Repressed by mating
FBgn0051465	CG31465	12.1384	3.38015	2.92203e-22	3.59109
FBgn0052686	CG32686	2.54977	0.843062	9.5351e-07	3.02442
FBgn0051174	CG31174	3.00796	1.01677	0.0350415	2.95836
FBgn0036381	CG8745	79.2897	27.0084	7.52964e-12	2.93574
FBgn0052681	CG32681	2.02216	0.712844	7.88026e-06	2.83675
FBgn0030218	CG1628	47.1016	17.2081	2.83419e-21	2.73717
FBgn0036995	CG5195	3.5428	1.29682	1.9003e-07	2.73192
FBgn0037612	CG8112	43.0104	15.854	4.20345e-12	2.71291
FBgn0038002	CG12256	2.68148	1.02671	0.0015809	2.61172
FBgn0037166	CG11426	11.0053	4.37123	3.89735e-10	2.51766
FBgn0050289	CG30289	7.72726	3.07552	0.000678932	2.5125
FBgn0029831	CG5966	34.301	13.9294	6.31601e-05	2.46249
FBgn0028939	NimC2	2.47587	1.01734	0.00112366	2.43368
FBgn0034538	CG16799	25.2718	10.4469	6.01427e-08	2.41906
FBgn0053092	P5CDh2	13.3762	5.56058	1.48105e-11	2.40553
FBgn0083970	CG34134	22.5369	9.58173	0.0181536	2.35207
FBgn0035159	CG13896	2.82465	1.20174	0.0320059	2.35046
FBgn0085779	CR40963	1541.89	679.569	0.0211872	2.26893
FBgn0033397	Cyp4p3	5.24481	2.40485	0.000995394	2.18093
FBgn0263454	CR43477	4.89657	2.29188	0.0201136	2.13648
FBgn0040609	CG3348	24.446	11.4544	0.00225834	2.1342
FBgn0035211	CG2211	5.42491	2.55685	0.0267109	2.12171
FBgn0030522	CG11103	5.26598	2.51932	0.0445385	2.09024
FBgn0050010	CG30010	8.30863	4.01217	0.00341757	2.07086
FBgn0019952	Orct	19.4528	9.4616	3.08064e-09	2.05597
FBgn0053926	CG33926	25.746	12.5605	0.0036648	2.04976
FBgn0024740	Lip2	5.22509	2.56073	0.0223759	2.04047
FBgn0040732	CG16926	259.086	127.786	5.27971e-12	2.02751
FBgn0031999	CG8419	3.80942	1.89466	0.000253302	2.01061
FBgn0036837	CG18135	276.526	138.92	7.68245e-11	1.99054
FBgn0046999	CG6429	29.1612	14.8704	6.4374e-06	1.96103
FBgn0051810	CG31810	3.47342	1.78748	0.00460583	1.9432
FBgn0010651	l(2)08717	61.3727	31.6174	4.22578e-10	1.9411
FBgn0035282	CG13936	10.1421	5.31327	0.0365051	1.90882
FBgn0033454	CG1671	4.57811	2.41737	0.00608055	1.89384
FBgn0037635	CG9837	46.5098	24.6655	5.05031e-06	1.88562
FBgn0029648	CG3603	17.3568	9.23522	0.0105033	1.87941
FBgn0014427	CG11899	88.4244	47.7837	6.64672e-09	1.85051
FBgn0039417	CG6073	6.72251	3.64309	0.0156644	1.84528
FBgn0002868	MtnA	2354.55	1279.7	1.72153e-06	1.83993
FBgn0014396	tim	76.5127	41.8934	1.04081e-06	1.82636
FBgn0027562	CG10345	57.6847	31.7426	8.67322e-09	1.81726
FBgn0083984	CG34148	15.2827	8.44666	0.000179214	1.80932
FBgn0086348	se	25.9842	14.3854	0.000697421	1.80629
FBgn0050355	CG30355	5.34083	2.96561	0.00119758	1.80092
FBgn0030607	dob	31.5821	17.7064	3.51683e-06	1.78366
FBgn0036046	Ilp2	131.905	74.1765	1.66975e-08	1.77825
FBgn0037396	CG11459	8.7039	4.90683	0.0154597	1.77383
FBgn0051809	CG31809	5.03057	2.83806	0.00556239	1.77254
FBgn0038897	CG5849	9.83743	5.58227	0.000177056	1.76226
FBgn0027579	CG5508	79.2866	45.2875	0.000100233	1.75074
FBgn0036875	CG9449	11.5163	6.60469	0.00301022	1.74365
FBgn0030262	Vago	85.9588	49.3147	1.28528e-05	1.74306
FBgn0037356	CG12170	7.25878	4.18238	0.0271167	1.73556
FBgn0033065	Cyp6w1	110.794	63.8551	3.08064e-09	1.73508
FBgn0039040	CG13833	23.6073	13.6364	0.000267005	1.7312
FBgn0040890	ksh	10.2009	5.91422	0.0343224	1.7248
FBgn0038473	Ns1	13.564	7.91219	0.000451684	1.71432
FBgn0051436	CG31436	10.8617	6.36679	0.0036648	1.70599
FBgn0034259	P32	17.6272	10.3531	0.00136008	1.70261
FBgn0013772	Cyp6a8	8.5279	5.00922	0.00231726	1.70244
FBgn0039629	CG11842	13.6662	8.03261	0.00976599	1.70134
FBgn0038652	CG7720	17.4051	10.2339	1.78358e-05	1.70072
FBgn0033453	CG1667	12.1016	7.12077	0.000413266	1.69948
FBgn0044050	Ilp3	21.9936	12.9945	0.00425321	1.69253
FBgn0065064	snoRNA:Psi28S-291	8.18931	4.84473	0.00969335	1.69035
FBgn0029828	CG6067	168.1	99.6022	1.45611e-05	1.68772
FBgn0014417	CG13397	9.45095	5.60993	0.000360557	1.68468
FBgn0032512	CG9305	9.05946	5.43837	0.0089878	1.66584
FBgn0033543	CG12338	102.955	62.2092	0.000115448	1.65497
FBgn0260866	dnr1	21.3175	12.8846	1.67946e-05	1.65449
FBgn0051704	CG31704	31.8554	19.2761	0.0208697	1.65259
FBgn0036764	CG5535	7.35274	4.45468	0.013688	1.65057
FBgn0039525	CG5646	11.1188	6.75805	0.00748289	1.64527
FBgn0020513	ade5	416.999	254.826	4.46265e-05	1.63641
FBgn0031489	CG17224	53.8366	32.9868	1.4632e-06	1.63206
FBgn0034356	CG10924	23.9987	14.771	0.0160037	1.62472
FBgn0013307	Odc1	56.5514	34.8119	2.98589e-06	1.62448
FBgn0026196	nop5	18.6004	11.5159	0.00134306	1.61519
FBgn0086687	desat1	1790.81	1108.77	4.35417e-05	1.61514
FBgn0034501	CG13868	194.282	120.358	0.000389048	1.61421
FBgn0036262	CG6910	386.281	240.879	0.00108448	1.60363
FBgn0052368	CG32368	36.1513	22.6779	0.0380407	1.59412
FBgn0053123	CG33123	13.247	8.33403	1.95759e-05	1.58951
FBgn0053548	msta	36.8591	23.2067	0.000813337	1.5883
FBgn0262952	mt:ND4	848.144	534.524	1.78358e-05	1.58673
FBgn0025687	LKR	12.3452	7.79108	0.000285894	1.58453
FBgn0014455	Ahcy13	55.674	35.1759	0.000228836	1.58273
FBgn0034628	Acox57D-p	13.9634	8.83638	0.000257422	1.58022
FBgn0032022	CG14275	57.9594	36.7436	0.000514793	1.5774
FBgn0028473	CG8801	228.786	145.578	1.36118e-06	1.57157
FBgn0032167	CG5853	29.5376	18.8165	0.000241117	1.56977
FBgn0003257	r-l	5.58301	3.5592	0.0242337	1.56862
FBgn0030558	CG1461	132.926	84.9854	1.22643e-05	1.5641
FBgn0032482	Pect	108.878	69.6326	0.000511911	1.5636
FBgn0034401	CG15100	7.51012	4.81282	0.00198664	1.56044
FBgn0033366	Ance-4	67.6169	43.3326	0.00314684	1.56042
FBgn0086367	t	68.8033	44.0983	8.83933e-06	1.56022
FBgn0039203	CG13618	13.7417	8.82271	0.0300707	1.55754
FBgn0032262	CG7384	7.86775	5.10231	0.0332191	1.542
FBgn0027086	Aats-ile	20.2697	13.1708	8.67356e-05	1.53899
FBgn0029898	CG14439	26.4038	17.176	0.000991197	1.53725
FBgn0031414	eys	28.1765	18.3308	8.29232e-06	1.53711
FBgn0036199	Bmcp	12.532	8.15431	0.00417563	1.53686
FBgn0036030	CG6767	160.023	104.135	0.00120379	1.53668
FBgn0037708	CG9386	5.17704	3.37722	0.0487141	1.53293
FBgn0039183	Dis3	3.05931	1.99676	0.048973	1.53214
FBgn0038146	CG9799	4.66638	3.0482	0.0426701	1.53087
FBgn0030041	CG12116	168.332	110.483	0.000568924	1.5236
FBgn0017545	RpS3A	1179.6	775.116	4.55897e-06	1.52183
FBgn0036838	CG3808	5.43309	3.5713	0.0276126	1.52132
FBgn0033000	CG14464	26.5509	17.4962	0.0060124	1.51752
FBgn0051778	CG31778	84.449	55.7473	0.000257422	1.51485
FBgn0053156	CG33156	6.62717	4.37956	0.0166814	1.5132
FBgn0044048	Ilp5	33.7362	22.3076	0.022665	1.51232
FBgn0000536	eas	104.171	68.9769	0.00168797	1.51023
FBgn0086676	spin	67.4959	44.6991	2.22932e-05	1.51001
FBgn0011705	rost	124.252	82.4663	0.00427064	1.5067
FBgn0034443	cer	46.7936	31.1311	0.0435239	1.50312
FBgn0030151	CG1354	33.418	22.3077	0.000445329	1.49805
FBgn0037071	CG7632	10.0852	6.75361	0.0439206	1.49331
FBgn0032138	CG4364	95.6775	64.3636	0.000124696	1.48652
FBgn0036213	RpL10Ab	963.935	649.04	4.81527e-05	1.48517
FBgn0042641	frc	17.0243	11.4633	0.0237069	1.48511
FBgn0038799	CG4288	13.3238	8.97545	0.00999703	1.48447
FBgn0063923	Kaz1-ORFB	46.3381	31.2619	0.029524	1.48226
FBgn0036993	CG5910	33.8041	22.8123	0.00824489	1.48183
FBgn0028936	NimB5	17.5708	11.9067	0.00214774	1.47571
FBgn0004623	Gbeta76C	321.821	218.215	0.00013227	1.47479
FBgn0031694	Cyp4ac2	28.2561	19.1836	0.000503925	1.47293
FBgn0064237	Idgf5	49.5239	33.6797	0.00874259	1.47044
FBgn0038256	CG7530	30.3353	20.65	0.000699457	1.46903
FBgn0031660	mRpL28	24.2074	16.4937	0.0131031	1.46767
FBgn0001565	Hlc	31.5579	21.6766	0.00140447	1.45585
FBgn0053126	NLaz	28.6858	19.755	0.00865163	1.45208
FBgn0000406	Cyt-b5-r	462.814	318.831	0.00871329	1.4516
FBgn0014000	Hf	104.529	72.0243	0.00116254	1.45131
FBgn0029769	CG3239	40.2483	27.7485	0.0033528	1.45047
FBgn0037890	CG17734	67.411	46.5358	0.0042502	1.44858
FBgn0031117	GstT3	17.3123	11.976	0.0231874	1.44558
FBgn0033485	RpLP0-like	18.6163	12.8798	0.0342359	1.44539
FBgn0034110	Atg9	10.7492	7.45041	0.00653083	1.44277
FBgn0031860	CG11236	45.9481	31.8491	0.0243243	1.44268
FBgn0024957	Irp-1B	42.4259	29.4277	0.0056559	1.4417
FBgn0027080	Aats-tyr	22.1002	15.3295	0.00303705	1.44168
FBgn0034243	Ns2	18.8146	13.1035	0.00385497	1.43584
FBgn0013678	mt:Cyt-b	3757.62	2617.66	0.000951501	1.43549
FBgn0029969	CG10932	33.3789	23.2814	0.00874259	1.43371
FBgn0015569	alpha-Est10	23.651	16.5133	0.000706721	1.43224
FBgn0031220	CG4822	45.6003	31.8913	0.00120841	1.42987
FBgn0038682	CG5835	15.2126	10.6533	0.0291492	1.42797
FBgn0002936	ninaA	55.3305	38.7775	0.00748289	1.42687
FBgn0032945	CG8665	33.8071	23.6957	0.0298226	1.42672
FBgn0000052	ade2	33.8245	23.7312	0.0131031	1.42532
FBgn0064225	RpL5	1929.02	1354.83	0.000500212	1.42381
FBgn0040064	yip2	141.209	99.3013	0.000464843	1.42203
FBgn0015277	Pi3K59F	6.28561	4.42548	0.0380977	1.42032
FBgn0086443	Aats-asn	25.2575	17.7966	0.00112366	1.41923
FBgn0037648	CG11975	14.9498	10.5385	0.0296662	1.41859
FBgn0035344	Cyp4d20	38.9139	27.4336	0.00147948	1.41848
FBgn0029885	CG3224	29.2204	20.6008	0.010652	1.41841
FBgn0032924	Nbr	11.1632	7.87267	0.0243243	1.41797
FBgn0016076	vri	52.7997	37.2483	0.00113007	1.41751
FBgn0034717	CG5819	19.249	13.5999	0.0076231	1.41538
FBgn0024733	RpL10	1283.75	907.776	0.000385621	1.41417
FBgn0039970	CG17508	166.579	117.872	0.000373753	1.41322
FBgn0028425	JhI-21	19.535	13.8282	0.000908355	1.41269
FBgn0040968	CG14933	110.491	78.265	0.0161092	1.41175
FBgn0015622	Cnx99A	92.5942	65.7103	0.000482548	1.40913
FBgn0263120	Acsl	338.332	240.335	0.00228589	1.40775
FBgn0036462	mRpL39	9.52184	6.77809	0.0475606	1.4048
FBgn0052425	CG32425	116.17	82.7427	0.0237069	1.40399
FBgn0260234	CG42508	141.581	101.175	0.00575491	1.39937
FBgn0034605	CG15661	24.7214	17.6761	0.00416251	1.39858
FBgn0032382	Mal-B2	58.2949	41.6941	0.00198664	1.39816
FBgn0027084	Aats-lys	20.5229	14.7414	0.00944426	1.39219
FBgn0086706	pix	109.168	78.4397	0.00155382	1.39174
FBgn0019932	SamDC	38.8698	27.9381	0.0192386	1.39129
FBgn0039241	CG11089	94.9635	68.3868	0.0446223	1.38862
FBgn0026592	Fie	68.0942	49.1093	0.0131031	1.38659
FBgn0038053	CG18549	19.9086	14.3595	0.0133647	1.38644
FBgn0039152	Rootletin	16.0335	11.5682	0.00592891	1.386
FBgn0010611	Hmgs	17.4743	12.6087	0.0125507	1.38589
FBgn0027621	Pfrx	106.503	76.8677	0.0118079	1.38554
FBgn0005391	Yp2	13352.9	9660.35	0.0418413	1.38223
FBgn0035028	Start1	8.89082	6.43549	0.0324112	1.38153
FBgn0036975	CG5618	65.8461	47.7051	0.0051563	1.38027
FBgn0016126	CaMKI	201.45	146.032	0.00249169	1.37949
FBgn0087013	Karybeta3	75.7641	54.9534	0.00222656	1.3787
FBgn0040007	RpL38	863.997	627.572	0.00772251	1.37673
FBgn0050118	CG30118	99.7851	72.5509	0.00695836	1.37538
FBgn0005278	Sam-S	165.756	120.684	0.00877734	1.37347
FBgn0028697	RpL15	1223.76	891.549	0.00420378	1.37263
FBgn0039099	CG10157	42.0381	30.6668	0.0343224	1.3708
FBgn0031836	CG11050	57.0129	41.6518	0.0235591	1.3688
FBgn0032484	kek4	10.1345	7.4072	0.0450495	1.3682
FBgn0052695	CG32695	55.3497	40.5467	0.0156485	1.36509
FBgn0037643	skap	260.057	190.659	0.00266821	1.36399
FBgn0034654	CG10306	76.5994	56.2361	0.0125938	1.3621
FBgn0033902	Tango7	105.64	77.6704	0.00442998	1.3601
FBgn0027610	Dic1	58.8204	43.2686	0.00867338	1.35942
FBgn0037936	CG6908	26.0732	19.2318	0.0302137	1.35573
FBgn0052068	CG32068	110.271	81.4547	0.0102228	1.35377
FBgn0035090	CG2736	234.646	173.496	0.0173749	1.35246
FBgn0058263	MFS17	43.2827	32.0278	0.0223195	1.35141
FBgn0037070	CG11309	64.2111	47.5798	0.0350532	1.34955
FBgn0034366	Atg7	4.97286	3.69105	0.0455445	1.34728
FBgn0000565	Eip71CD	70.3655	52.3249	0.0216931	1.34478
FBgn0032160	CG4598	39.4187	29.321	0.0240785	1.34439
FBgn0011581	Dms	117.385	87.4055	0.0172504	1.34299
FBgn0039938	Sox102F	29.7177	22.1524	0.0299735	1.34151
FBgn0034967	eIF-5A	840.068	627.506	0.00347422	1.33874
FBgn0011638	La	28.6649	21.4288	0.0271167	1.33768
FBgn0036007	path	182.269	136.566	0.00748289	1.33466
FBgn0036579	CG5027	34.8517	26.1274	0.0427547	1.33391
FBgn0032919	CG9253	27.0669	20.2927	0.0391427	1.33383
FBgn0039644	CG11897	8.2932	6.2191	0.0392997	1.3335
FBgn0031069	Pmp70	49.6821	37.3173	0.0118049	1.33134
FBgn0039298	to	37.7631	28.3792	0.0392997	1.33066
FBgn0039324	CG10553	23.0489	17.3413	0.0258071	1.32914
FBgn0050503	CG30503	135.897	102.413	0.0291492	1.32695
FBgn0016685	Nlp	33.6126	25.3644	0.0154177	1.32519
FBgn0000723	Fps85D	17.2002	12.9874	0.00859689	1.32437
FBgn0001208	Hn	387.299	292.478	0.0179127	1.3242
FBgn0027560	Tps1	280.737	212.077	0.0133186	1.32375
FBgn0035770	pst	172.288	130.248	0.00824489	1.32277
FBgn0010198	RpS15Aa	878.529	664.577	0.0101773	1.32194
FBgn0051445	CG31445	31.6203	23.9289	0.0203615	1.32143
FBgn0013672	mt:ATPase6	2751.42	2084.32	0.0203615	1.32006
FBgn0085342	CG34313	35.7651	27.1153	0.0235591	1.319
FBgn0031913	CG5958	95.6317	72.6394	0.0436603	1.31653
FBgn0003867	tsl	39.0537	29.6894	0.049142	1.31541
FBgn0053494	CG33494	55.8203	42.5063	0.0391427	1.31323
FBgn0037899	RpL24-like	96.18	73.6235	0.0419224	1.30638
FBgn0035162	CG13900	22.7556	17.4235	0.0276126	1.30603
FBgn0032494	CG5945	282.854	216.608	0.0190298	1.30583
FBgn0015756	RpL9	824.762	632.591	0.0112835	1.30379
FBgn0261808	cu	28.4485	21.8302	0.0269662	1.30318
FBgn0036116	CG7888	31.8934	24.4983	0.018224	1.30186
FBgn0038984	CG5315	425.7	327.418	0.0356844	1.30017
FBgn0033464	CG1441	14.2675	10.9884	0.0468392	1.29841
FBgn0034237	eIF3-S9	96.0172	73.9511	0.0159645	1.29839
FBgn0031107	HERC2	7.6423	5.89269	0.0299735	1.29691
FBgn0034438	CG9416	7.87336	6.08258	0.0259039	1.29441
FBgn0086558	Ubi-p5E	364.853	282.044	0.00421376	1.2936
FBgn0002607	RpL19	1140.93	883.208	0.0272924	1.2918
FBgn0003274	RpLP2	1128.17	877.43	0.0381283	1.28577
FBgn0261714	Cpn	48.9837	38.1385	0.0446223	1.28436
FBgn0032987	RpL21	1353.69	1054.81	0.0276126	1.28335
FBgn0034258	eIF3-S8	68.7892	53.8364	0.0297924	1.27774
FBgn0031649	hoe2	14.8258	11.6117	0.0316238	1.2768
FBgn0034638	CG10433	212.758	166.972	0.0493652	1.27422
FBgn0010411	RpS18	939.696	737.814	0.00427064	1.27362
FBgn0036258	CG5642	87.2357	68.5913	0.0397827	1.27182
FBgn0032836	CG10680	339.835	267.533	0.0393336	1.27025
FBgn0032166	CG4619	7.78041	6.13119	0.00472733	1.26899
FBgn0040735	CG16836	472.93	374.429	0.0222092	1.26307
FBgn0022023	eIF-3p40	102.799	81.4495	0.030375	1.26212
FBgn0033555	RpS15Ab	110.422	87.9556	0.0428809	1.25543
FBgn0264572	CR43944	23.3786	18.9993	0.0460122	1.2305
FBgn0263593	Lpin	53.2944	43.6867	0.0492568	1.21992
FBgn0051144	CR31144	175.332	146.348	0.0307282	1.19805
FBgn0052174	CG32174	7.46603	6.34685	0.0237069	1.17634
FBgn0261547	Exn	17.84	15.2022	0.0344077	1.17352
FBgn0040513	kappaB-Ras	6.16911	5.33822	0.0299735	1.15565
FBgn0050159	CG30159	9.64937	9.70924	0.0161092	0.993834
FBgn0264501	CR43900	5.54607	6.87559	0.000168192	0.806632
FBgn0000479	dnc	34.4441	45.4885	0.0330434	0.757204
FBgn0000448	Hr46	12.1995	16.2714	0.0299735	0.749749
FBgn0004838	Hrb27C	154.451	206.036	0.0468392	0.749632
FBgn0032946	nrv3	396.392	529.026	0.0329025	0.749288
FBgn0029895	CG14441	10.736	14.37	0.0437092	0.74711
FBgn0085450	Snoo	11.6587	15.645	0.0450327	0.745203
FBgn0263930	dally	23.4382	31.495	0.010208	0.744188
FBgn0002921	Atpalpha	385.681	518.663	0.0345259	0.743606
FBgn0264981	mamo	27.9989	38.0622	0.00905447	0.735609
FBgn0052043	CG32043	10.3539	14.099	0.0291522	0.734369
FBgn0013334	Sap47	132.882	181.389	0.0440827	0.732583
FBgn0051221	CG31221	105.406	144.211	0.0313455	0.730916
FBgn0003435	sm	42.9893	58.947	0.0232161	0.729288
FBgn0050052	Obp49a	60.9631	83.6105	0.0398116	0.729132
FBgn0035424	CG11505	19.8481	27.2922	0.0279315	0.727245
FBgn0263097	Glut4EF	39.2828	54.0391	0.0455445	0.726933
FBgn0086899	tlk	21.2463	29.2587	0.0446223	0.726155
FBgn0039562	Gp93	41.2359	56.8035	0.0489055	0.72594
FBgn0058469	CR40469	2153.09	2970.24	0.00361838	0.724887
FBgn0002643	mam	16.1793	22.3324	0.0105468	0.724474
FBgn0026084	cib	54.5506	75.3006	0.0386071	0.724437
FBgn0262483	Rbp	18.6561	25.7809	0.0374974	0.723641
FBgn0261259	Fhos	7.64923	10.5764	0.0475606	0.723234
FBgn0031118	RhoGAP19D	12.2276	16.9085	0.0341392	0.723162
FBgn0262569	CG43109	1.73077	2.39347	2.66702e-06	0.723121
FBgn0013759	CASK	55.5489	77.0063	0.0427938	0.721355
FBgn0038535	alt	31.3255	43.4491	0.0331612	0.720971
FBgn0051781	CR31781	19.0954	26.4909	0.0276126	0.72083
FBgn0003380	Sh	65.3341	90.6743	0.0158157	0.720536
FBgn0266000	CG44774	11.5456	16.0251	0.0497404	0.720471
FBgn0038181	CG9297	67.2519	93.5169	0.0237069	0.719142
FBgn0000046	Act87E	27.1099	37.7301	0.0357305	0.71852
FBgn0264255	para	35.2036	49.0262	0.0400944	0.718057
FBgn0004880	scrt	41.2418	57.4454	0.0176096	0.71793
FBgn0262736	Vha16-1	322.067	448.959	0.0131031	0.717364
FBgn0000256	capu	10.9084	15.207	0.0491656	0.717329
FBgn0001186	Hex-A	64.4495	89.8638	0.00351443	0.717191
FBgn0086675	fne	44.977	62.8956	0.0280325	0.715105
FBgn0052850	CG32850	39.74	55.5734	0.0325979	0.71509
FBgn0028743	CG5036	11.4728	16.0528	0.0408196	0.71469
FBgn0037153	olf413	10.5798	14.8506	0.0381379	0.712419
FBgn0020257	ppa	10.5688	14.8572	0.0328031	0.711363
FBgn0029814	CG15765	39.3891	55.3894	0.0427547	0.71113
FBgn0036814	CG14073	9.301	13.0974	0.024144	0.710139
FBgn0265193	Atf-2	37.5242	52.85	0.0105033	0.710013
FBgn0033268	Obp44a	392.745	553.382	0.0276025	0.709718
FBgn0052190	NUCB1	59.9727	84.543	0.0391427	0.709376
FBgn0035016	CG4612	37.3725	52.6861	0.0179089	0.709342
FBgn0037720	CG8312	10.9059	15.3762	0.0460122	0.709274
FBgn0000308	chic	182.196	256.961	0.0124795	0.709041
FBgn0264006	dysc	35.4618	50.0513	0.0193222	0.70851
FBgn0028875	nAcRalpha-34E	21.3518	30.1531	0.0344077	0.708112
FBgn0000273	Pka-C1	69.1309	97.6525	0.0118049	0.707928
FBgn0000568	Eip75B	32.8918	46.4738	0.00748289	0.707749
FBgn0260400	elav	27.8044	39.3014	0.0299974	0.707467
FBgn0000253	Cam	1019.13	1440.78	0.0026607	0.707347
FBgn0036746	Crtc	12.9637	18.3276	0.0415497	0.707334
FBgn0001122	Galphao	63.9914	90.6063	0.0118049	0.706257
FBgn0031632	CG15628	14.7891	20.9513	0.0299735	0.705878
FBgn0030812	CG8949	13.9038	19.7118	0.0150318	0.705357
FBgn0013343	Syx1A	44.8498	63.5909	0.0234959	0.705287
FBgn0036454	CG17839	37.9249	53.791	0.00548574	0.705041
FBgn0004595	pros	50.6645	71.8638	0.0118049	0.705007
FBgn0264442	ab	10.5813	15.0107	0.0468392	0.704918
FBgn0035505	Teh2	37.1165	52.6804	0.00999703	0.704561
FBgn0263995	cpo	42.7929	60.7588	0.0329025	0.704308
FBgn0000636	Fas3	11.4753	16.3488	0.0391427	0.701907
FBgn0029893	CG14442	13.1141	18.6973	0.0392997	0.701393
FBgn0033033	scaf	19.3412	27.5992	0.0259039	0.700787
FBgn0005585	Crc	175.159	249.994	0.0118571	0.700655
FBgn0259143	CG42258	37.1876	53.0924	0.0125938	0.700432
FBgn0259984	kuz	7.40292	10.5751	0.0158101	0.700036
FBgn0038063	Octbeta2R	14.9967	21.4724	0.0109581	0.698419
FBgn0015323	VAChT	32.474	46.5184	0.0131743	0.698089
FBgn0033403	CG13739	10.0314	14.3855	0.0235591	0.697329
FBgn0031629	Clect27	26.2118	37.6842	0.0299735	0.695564
FBgn0015399	kek1	11.609	16.6933	0.0166446	0.695427
FBgn0259682	Jabba	100.447	144.84	0.0450327	0.693505
FBgn0035495	CG14989	106.675	154.102	0.0033528	0.692238
FBgn0086677	jeb	19.5748	28.3258	0.00811105	0.69106
FBgn0016061	side	5.73895	8.30786	0.0328031	0.690786
FBgn0031258	CG4297	5.33187	7.72482	0.015133	0.690225
FBgn0050497	CG30497	87.6727	127.419	0.0033528	0.688064
FBgn0025643	CG3588	22.0909	32.1383	0.0427547	0.687372
FBgn0036801	MYPT-75D	7.56208	11.0301	0.023649	0.685586
FBgn0086707	ncm	10.5644	15.426	0.0426701	0.684844
FBgn0038179	CG9312	27.2964	39.8752	0.0439545	0.684544
FBgn0031191	Cp110	2.76109	4.0412	0.00459625	0.683236
FBgn0029843	Nep1	5.53012	8.12068	0.0296662	0.680993
FBgn0032151	nAcRalpha-30D	19.5381	28.6932	0.008621	0.68093
FBgn0030897	Frq1	22.291	32.8418	0.0146693	0.678738
FBgn0000017	Abl	11.4335	16.8464	0.0180038	0.678694
FBgn0036619	Cpr72Ec	83.1446	122.573	0.00452122	0.678329
FBgn0083963	CG34127	5.98179	8.82092	0.00595399	0.678137
FBgn0259789	vfl	2.92839	4.32517	0.0466612	0.677059
FBgn0265191	Glycogenin	37.8378	55.8881	0.00330653	0.677028
FBgn0262684	CG43154	32.4225	48.0438	0.00114872	0.674854
FBgn0011666	msi	19.9023	29.5046	0.0357305	0.674547
FBgn0034497	CG9090	25.7658	38.2119	0.00819885	0.674287
FBgn0033593	Listericin	74.4275	110.518	0.00772251	0.67344
FBgn0030847	CG12991	15.6343	23.2618	0.0299476	0.672103
FBgn0036862	Gbs-76A	21.7354	32.3539	0.00595399	0.671802
FBgn0051869	CG31869	4.76107	7.09394	0.0203615	0.671146
FBgn0036165	chrb	56.76	84.7104	0.00347422	0.670048
FBgn0004169	up	127.089	190.047	0.000731837	0.668723
FBgn0011766	E2f	17.6087	26.3347	0.0102228	0.668648
FBgn0004507	GlyP	100.562	150.448	0.00140447	0.668417
FBgn0011481	Ssdp	19.3385	28.9378	0.00214608	0.668278
FBgn0011206	bol	46.6609	70.1092	0.00074813	0.665546
FBgn0023529	CG2918	40.0182	60.1786	0.0060124	0.664991
FBgn0037163	laza	10.3658	15.6104	0.010652	0.66403
FBgn0004244	Rdl	41.8955	63.2665	0.000583618	0.662206
FBgn0005677	dac	3.02311	4.5655	0.0237069	0.662163
FBgn0264894	CG44085	26.0681	39.3797	0.00437808	0.661969
FBgn0032536	Ance-3	7.40778	11.204	0.00890103	0.661171
FBgn0010113	hdc	10.5502	16.0186	0.00345889	0.658622
FBgn0259678	sqa	3.83675	5.82634	0.0280102	0.658518
FBgn0028550	Atf3	13.274	20.1796	0.00330835	0.657793
FBgn0085364	CR34335	1065.96	1621.1	2.44142e-05	0.657552
FBgn0040382	CG5273	95.7782	146.02	0.000908355	0.655925
FBgn0030593	CG9512	158.693	242.162	0.00325606	0.655317
FBgn0052423	shep	109.252	166.867	0.00344171	0.654726
FBgn0036876	CG9451	24.9998	38.3754	0.00890103	0.651453
FBgn0040153	l(1)G0469	7.99092	12.2709	0.0158292	0.651207
FBgn0037636	CG9821	240.283	369.33	0.000267005	0.650593
FBgn0029894	CG14440	14.3301	22.0828	0.00299296	0.648923
FBgn0039494	grass	9.01996	13.9018	0.0487388	0.648834
FBgn0035710	SP1173	15.8879	24.5589	0.00364036	0.646928
FBgn0259244	CG42342	12.7476	19.7065	0.00548574	0.646872
FBgn0260943	Rbp6	78.6646	122.101	0.000278625	0.644257
FBgn0026411	Lim1	6.09088	9.47694	0.00556239	0.642706
FBgn0003463	sog	17.3966	27.1101	0.00088722	0.641704
FBgn0034408	sano	6.20811	9.68455	0.00307683	0.641032
FBgn0031089	CG9572	11.2182	17.501	0.0132101	0.641
FBgn0029837	Tsp5D	12.1609	19.0022	0.00584211	0.63997
FBgn0024941	RSG7	13.241	20.6901	0.000278625	0.639967
FBgn0264272	mwh	4.09837	6.40806	0.0386071	0.639565
FBgn0261509	haf	2.23453	3.49617	0.0299735	0.639137
FBgn0034286	dpr13	6.56118	10.2817	0.00114396	0.63814
FBgn0053988	CG33988	11.6008	18.2729	0.000241209	0.634867
FBgn0259680	Pkcdelta	5.26372	8.3128	0.00519053	0.633206
FBgn0000490	dpp	5.91642	9.35112	0.0033528	0.632696
FBgn0035481	CG12605	26.0271	41.3054	4.6265e-05	0.630113
FBgn0024321	NK7.1	14.248	22.6867	0.000319871	0.628032
FBgn0032283	CG7296	22.1758	35.3164	0.0304335	0.627917
FBgn0033602	Cpr47Ee	12.5388	20.0075	0.0144136	0.626708
FBgn0038733	CG11407	25.8648	41.302	0.00368101	0.626237
FBgn0004198	ct	18.4303	29.6022	0.000629866	0.622598
FBgn0032286	CG7300	24.8382	40.0805	0.000300251	0.619709
FBgn0038774	CG5023	26.1025	42.187	0.00985266	0.618734
FBgn0003984	vn	2.99365	4.84009	0.0118049	0.618512
FBgn0050069	CG30069	15.7913	25.5329	1.69972e-05	0.618469
FBgn0014163	fax	64.7473	104.702	0.0002011	0.618395
FBgn0005626	ple	13.2828	21.5592	0.003109	0.616107
FBgn0030479	Rbp1-like	56.3665	91.7549	0.000464321	0.614316
FBgn0001218	Hsc70-3	148.518	242.171	4.93014e-05	0.613278
FBgn0040775	CG12158	440.811	720.266	7.61373e-07	0.612012
FBgn0085387	shakB	16.7858	27.4428	0.00020942	0.611664
FBgn0029639	CG14419	42.738	69.904	0.000419892	0.611381
FBgn0005614	trpl	245.264	401.443	3.78797e-06	0.610955
FBgn0053639	CG33639	5.55934	9.10229	0.00263653	0.610763
FBgn0023076	Clk	5.13405	8.42514	0.00174202	0.609373
FBgn0039309	CG11891	7.87111	13.0634	0.0439358	0.602532
FBgn0026077	Gasp	9.01142	14.9565	0.0108869	0.602509
FBgn0041094	scyl	134.617	223.494	4.73286e-05	0.602329
FBgn0035490	CG1136	3.71328	6.23865	0.030375	0.595206
FBgn0033093	CG3270	9.06067	15.3828	0.00828581	0.589013
FBgn0085446	CG34417	38.0564	64.6419	7.64904e-05	0.588727
FBgn0025678	CaBP1	18.4609	31.8682	0.000104418	0.579288
FBgn0038589	CG18598	22.5234	39.1353	0.0392997	0.575526
FBgn0027339	jim	47.4669	82.7732	1.81797e-05	0.573457
FBgn0265487	mbl	61.1528	107.373	0.00018362	0.569536
FBgn0263039	CR43334	1.66317	2.93026	0.00015999	0.567585
FBgn0013679	mt:ND1	1073.84	1926.47	2.98589e-06	0.55741
FBgn0013673	mt:ATPase8	199.063	357.333	0.0200438	0.55708
FBgn0262510	CR43080	8.1309	14.6877	0.00982912	0.553585
FBgn0036627	Grp	2.95759	5.34576	0.0439358	0.553259
FBgn0004396	CrebA	12.5869	22.8262	0.000211767	0.551423
FBgn0004858	elB	6.75076	12.2716	2.4126e-05	0.550114
FBgn0039311	CG10513	5.25168	9.6006	0.00982912	0.547016
FBgn0038147	CCHa2	67.5529	123.916	1.0377e-06	0.545152
FBgn0037126	CG14567	8.03393	14.8289	0.0203615	0.541774
FBgn0263019	CR43314	1.75925	3.29212	0.00592063	0.534382
FBgn0038820	CG4000	83.0579	155.882	5.33741e-08	0.532824
FBgn0027556	CG4928	20.9081	39.6436	1.62263e-08	0.527401
FBgn0032507	CG9377	7.66351	14.6706	0.0026624	0.522372
FBgn0023540	CG3630	8.82593	17.2099	5.4305e-06	0.512839
FBgn0035755	CG14830	6.71347	13.1916	0.000262273	0.508919
FBgn0085755	CR40611	1.79183	3.5457	0.0322296	0.505354
FBgn0034511	CG13422	35.5378	70.6633	0.000285795	0.502917
FBgn0013680	mt:ND2	34.9506	69.8329	5.52377e-06	0.500489
FBgn0026197	noe	2061.39	4130.92	9.23397e-11	0.499014
FBgn0264617	CR43957	5.79941	12.0319	0.00307683	0.482002
FBgn0035544	CG15021	8.41376	17.5136	1.64996e-07	0.480412
FBgn0040817	CG14132	6.09771	12.7144	0.0145519	0.479591
FBgn0051451	CR31451	249.625	520.998	4.75281e-10	0.479129
FBgn0039161	CG13606	4.18255	8.96803	0.0322523	0.466384
FBgn0030054	Caf1-180	0.875784	1.89043	0.0074862	0.463272
FBgn0261836	Msp-300	44.7855	97.7334	4.46265e-05	0.458242
FBgn0032639	CG18563	2.13953	4.81837	0.0284999	0.444037
FBgn0052816	CG32816	2.31909	5.23061	0.00198664	0.443368
FBgn0042201	Nplp3	486.218	1103.65	7.3702e-14	0.440556
FBgn0031942	CG7203	25.3634	58.7963	5.56248e-13	0.431377
FBgn0026314	Ugt35b	7.22579	16.7749	2.38882e-08	0.43075
FBgn0040718	CG15353	15.4602	35.9365	0.00011255	0.430208
FBgn0039488	CG6066	1.72964	4.02749	0.0163478	0.429459
FBgn0030763	CG9782	1.31918	3.14589	0.0125938	0.419336
FBgn0002931	net	1.96473	4.69564	0.00376872	0.418415
FBgn0004187	snRNA:U1:95Cc	4.34757	10.4265	0.00606251	0.416971
FBgn0259183	CG42287	2.35741	5.65968	0.0114189	0.416526
FBgn0001226	Hsp27	1.16224	2.93015	0.0249828	0.396647
FBgn0085803	CR41550	11.3974	28.8164	8.0631e-09	0.395519
FBgn0032590	CG4631	1.54685	3.91538	0.000239061	0.39507
FBgn0040993	CG17325	99.6449	256.319	2.8098e-19	0.388754
FBgn0003174	pwn	0.504157	1.29913	0.013342	0.388074
FBgn0035255	RabX5	1.77456	4.65689	0.0359606	0.381061
FBgn0085818	CR41608	8.22232	21.8378	5.47617e-15	0.376517
FBgn0051815	CG31815	1.30762	3.48897	0.00853205	0.374787
FBgn0034328	IM23	20.923	59.6768	1.1803e-05	0.350605
FBgn0033442	CG1690	2.28612	6.5253	2.62678e-06	0.350347
FBgn0261538	CG42662	5.29082	15.5278	0.00331163	0.340733
FBgn0027584	CG4757	14.4	43.7368	3.46964e-07	0.329243
FBgn0085756	CR40613	3.50062	10.6477	3.20657e-11	0.328767
FBgn0024989	CG3777	0.40237	1.23961	0.0112835	0.324593
FBgn0035553	CG13722	0.729591	2.25591	0.000170559	0.323413
FBgn0050098	CG30098	3.70661	11.5356	0.000207534	0.321319
FBgn0013683	mt:ND4L	11.2434	35.7112	0.000130934	0.314842
FBgn0085744	CR40561	0.584742	2.01738	4.25918e-10	0.289852
FBgn0033863	CG13337	0.392991	1.35786	0.00347422	0.289418
FBgn0036589	CG13067	6.35689	22.039	1.29059e-09	0.288438
FBgn0040994	CR17567	2.32518	8.20516	0.0298732	0.28338
FBgn0085752	CR40594	5.74105	20.7584	1.47782e-14	0.276565
FBgn0013685	mt:ND6	26.3839	97.8995	2.26223e-14	0.2695
FBgn0002562	Lsp1alpha	5.27146	20.1391	1.36118e-06	0.261753
FBgn0262881	CG43236	13.666	52.7736	1.27854e-09	0.258955
FBgn0085294	CG34265	2.31418	9.21589	0.00341757	0.251108
FBgn0032638	CG6639	7.95291	34.5019	0.0146693	0.230507
FBgn0085824	CR41618	0.487718	2.72871	4.8317e-06	0.178736
FBgn0033865	CG6220	1.38856	7.87527	3.63124e-31	0.17632
FBgn0014865	Mtk	87.8784	551.992	4.45433e-19	0.159202
FBgn0260455	CG10332	14.961	95.0643	8.05417e-21	0.157378
FBgn0041579	AttC	23.082	163.748	4.38643e-30	0.140961
FBgn0043575	PGRP-SC2	1.43431	11.1627	0.00168897	0.128491
FBgn0041581	AttB	3.90486	33.0721	5.71593e-15	0.118071
FBgn0000277	CecA2	1.03729	11.0099	8.05694e-05	0.0942141
FBgn0012042	AttA	2.23199	26.0891	1.58538e-22	0.0855525
FBgn0034407	DptB	16.7019	197.933	1.38152e-20	0.0843816
FBgn0010388	Dro	20.9611	252.066	9.82709e-21	0.0831573
FBgn0010381	Drs	16.1691	233.361	1.41144e-14	0.069288
FBgn0263018	snRNA:U4atac:82E	0.327983	5.79297	0.038702	0.0566174
FBgn0052185	edin	0.459033	10.8499	1.48105e-11	0.0423078
FBgn0000276	CecA1	0.495516	13.3831	1.81797e-05	0.0370254
FBgn0004240	Dpt	4.97771	142.634	7.50884e-37	0.0348985
FBgn0264541	CR43920	0	13.5404	3.27605e-07	0

[truncated: 5 more sheets: 3FN_VFN, 3FN_3FG, 3MG_Vber, 3MN_Vber, 3MN_3MG]
