# Supplementary material
Source: publisher figshare collection journal article supplement (https://gsajournals.figshare.com/articles/dataset/_/11317307)
Supplement: Supplementary file 3 [file 2]

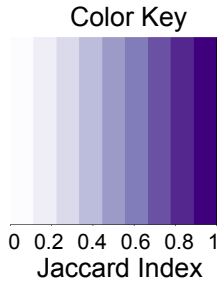

### Overlapping Gene Lists

|                                                                                      |                                                                                        |                                                                                       |                                                                                         |                                                                                      |                                                                                        |                                                                                       |                                                                                         |                                                                                      |                                                                                        |                                                                                       |                                                                                         |                                                                                      |                                                                                        |                                                                                       |                                                                                         |                                                           |                                                             |                                                           |                                                             |                                                                                         |
|--------------------------------------------------------------------------------------|----------------------------------------------------------------------------------------|---------------------------------------------------------------------------------------|-----------------------------------------------------------------------------------------|--------------------------------------------------------------------------------------|----------------------------------------------------------------------------------------|---------------------------------------------------------------------------------------|-----------------------------------------------------------------------------------------|--------------------------------------------------------------------------------------|----------------------------------------------------------------------------------------|---------------------------------------------------------------------------------------|-----------------------------------------------------------------------------------------|--------------------------------------------------------------------------------------|----------------------------------------------------------------------------------------|---------------------------------------------------------------------------------------|-----------------------------------------------------------------------------------------|-----------------------------------------------------------|-------------------------------------------------------------|-----------------------------------------------------------|-------------------------------------------------------------|-----------------------------------------------------------------------------------------|
| 0e+00                                                                                | N.S.                                                                                   | 4e-128                                                                                | N.S.                                                                                    | 1e-141                                                                               | 6e-06                                                                                  | 1e-79                                                                                 | 2e-09                                                                                   | 6e-41                                                                                | 3e-10                                                                                  | 1e-140                                                                                | 3e-07                                                                                   | 1e-25                                                                                | 2e-12                                                                                  | 3e-38                                                                                 | 6e-09                                                                                   | 2e-02                                                     | 2e-15                                                       | 3e-13                                                     | 2e-03                                                       | Induced- 1-day post-mating <i>tud</i> /+ female with a germline mated to Berlin male    |
| N.S.                                                                                 | 0e+00                                                                                  | N.S.                                                                                  | 3e-81                                                                                   | N.S.                                                                                 | 1e-94                                                                                  | N.S.                                                                                  | 1e-91                                                                                   | 1e-02                                                                                | 9e-14                                                                                  | 3e-29                                                                                 | 6e-06                                                                                   | 4e-04                                                                                | 2e-09                                                                                  | 3e-04                                                                                 | 1e-06                                                                                   | 7e-03                                                     | 4e-08                                                       | 3e-08                                                     | 8e-16                                                       | Repressed- 1-day post-mating <i>tud</i> /+ female with a germline mated to Berlin male  |
| 4e-128                                                                               | N.S.                                                                                   | 0e+00                                                                                 | N.S.                                                                                    | 7e-56                                                                                | 4e-07                                                                                  | 3e-50                                                                                 | 2e-17                                                                                   | 8e-19                                                                                | 4e-16                                                                                  | 2e-87                                                                                 | 4e-09                                                                                   | 6e-24                                                                                | 3e-13                                                                                  | 6e-20                                                                                 | 2e-16                                                                                   | N.S.                                                      | 6e-14                                                       | 9e-07                                                     | 1e-04                                                       | Induced- 1-day post-mating <i>tud</i> /+ female with no germline mated to Berlin male   |
| N.S.                                                                                 | 3e-81                                                                                  | N.S.                                                                                  | 2e-277                                                                                  | 5e-02                                                                                | 6e-40                                                                                  | N.S.                                                                                  | 6e-45                                                                                   | 1e-03                                                                                | 4e-11                                                                                  | N.S.                                                                                  | 7e-19                                                                                   | 2e-03                                                                                | 9e-11                                                                                  | N.S.                                                                                  | 4e-06                                                                                   | 4e-04                                                     | 1e-03                                                       | 7e-10                                                     | 7e-05                                                       | Repressed- 1-day post-mating <i>tud</i> /+ female with no germline mated to Berlin male |
| 1e-141                                                                               | N.S.                                                                                   | 7e-56                                                                                 | 5e-02                                                                                   | 0e+00                                                                                | N.S.                                                                                   | 1e-209                                                                                | N.S.                                                                                    | 1e-25                                                                                | 7e-08                                                                                  | 4e-100                                                                                | 4e-04                                                                                   | 2e-31                                                                                | 2e-02                                                                                  | 5e-40                                                                                 | 4e-03                                                                                   | 4e-06                                                     | 7e-18                                                       | 2e-13                                                     | 6e-09                                                       | Induced- 1-day post-mating Berlin female mated to <i>tud</i> /+ male with a germline    |
| 6e-06                                                                                | 1e-94                                                                                  | 4e-07                                                                                 | 6e-40                                                                                   | N.S.                                                                                 | 0e+00                                                                                  | N.S.                                                                                  | 2e-292                                                                                  | 2e-08                                                                                | 1e-07                                                                                  | 5e-44                                                                                 | 3e-09                                                                                   | 3e-03                                                                                | 6e-18                                                                                  | 2e-09                                                                                 | 4e-11                                                                                   | N.S.                                                      | 7e-09                                                       | N.S.                                                      | 1e-12                                                       | Repressed- 1-day post-mating Berlin female mated to <i>tud</i> /+ male with a germline  |
| 1e-79                                                                                | N.S.                                                                                   | 3e-50                                                                                 | N.S.                                                                                    | 1e-209                                                                               | N.S.                                                                                   | 0e+00                                                                                 | N.S.                                                                                    | 3e-19                                                                                | 2e-10                                                                                  | 7e-57                                                                                 | 1e-13                                                                                   | 2e-38                                                                                | 2e-02                                                                                  | 1e-37                                                                                 | 3e-03                                                                                   | 4e-04                                                     | 3e-17                                                       | 1e-08                                                     | 1e-12                                                       | Induced- 1-day post-mating Berlin female mated to <i>tud</i> /+ male with no germline   |
| 2e-09                                                                                | 1e-91                                                                                  | 2e-17                                                                                 | 6e-45                                                                                   | N.S.                                                                                 | 2e-292                                                                                 | N.S.                                                                                  | 0e+00                                                                                   | 3e-05                                                                                | 2e-07                                                                                  | 7e-32                                                                                 | 5e-07                                                                                   | N.S.                                                                                 | 2e-16                                                                                  | N.S.                                                                                  | 8e-11                                                                                   | N.S.                                                      | 4e-02                                                       | 2e-03                                                     | 1e-08                                                       | Repressed- 1-day post-mating Berlin female mated to <i>tud</i> /+ male with no germline |
| 6e-41                                                                                | 1e-02                                                                                  | 8e-19                                                                                 | 1e-03                                                                                   | 1e-25                                                                                | 2e-08                                                                                  | 3e-19                                                                                 | 3e-05                                                                                   | 0e+00                                                                                | N.S.                                                                                   | 2e-129                                                                                | N.S.                                                                                    | 8e-118                                                                               | N.S.                                                                                   | 6e-80                                                                                 | N.S.                                                                                    | 6e-08                                                     | 1e-03                                                       | 1e-09                                                     | 1e-05                                                       | Induced- 3-day post-mating <i>tud</i> /+ female with a germline mated to Berlin male    |
| 3e-10                                                                                | 9e-14                                                                                  | 4e-16                                                                                 | 4e-11                                                                                   | 7e-08                                                                                | 1e-07                                                                                  | 2e-10                                                                                 | 2e-07                                                                                   | N.S.                                                                                 | 0e+00                                                                                  | N.S.                                                                                  | 1e-181                                                                                  | N.S.                                                                                 | 6e-123                                                                                 | N.S.                                                                                  | 5e-111                                                                                  | 5e-02                                                     | 3e-02                                                       | N.S.                                                      | 4e-03                                                       | Repressed- 3-day post-mating <i>tud</i> /+ female with a germline mated to Berlin male  |
| 1e-140                                                                               | 3e-29                                                                                  | 2e-87                                                                                 | N.S.                                                                                    | 4e-100                                                                               | 5e-44                                                                                  | 7e-57                                                                                 | 7e-32                                                                                   | 2e-129                                                                               | N.S.                                                                                   | 0e+00                                                                                 | N.S.                                                                                    | 7e-74                                                                                | N.S.                                                                                   | 1e-135                                                                                | N.S.                                                                                    | N.S.                                                      | 1e-53                                                       | 3e-07                                                     | 3e-26                                                       | Induced- 3-day post-mating <i>tud</i> /+ female with no germline mated to Berlin male   |
| 3e-07                                                                                | 6e-06                                                                                  | 4e-09                                                                                 | 7e-19                                                                                   | 4e-04                                                                                | 3e-09                                                                                  | 1e-13                                                                                 | 5e-07                                                                                   | N.S.                                                                                 | 1e-181                                                                                 | N.S.                                                                                  | 0e+00                                                                                   | N.S.                                                                                 | 6e-74                                                                                  | N.S.                                                                                  | 6e-118                                                                                  | 1e-02                                                     | N.S.                                                        | N.S.                                                      | N.S.                                                        | Repressed- 3-day post-mating <i>tud</i> /+ female with no germline mated to Berlin male |
| 1e-25                                                                                | 4e-04                                                                                  | 6e-24                                                                                 | 2e-03                                                                                   | 2e-31                                                                                | 3e-03                                                                                  | 2e-38                                                                                 | N.S.                                                                                    | 8e-118                                                                               | N.S.                                                                                   | 7e-74                                                                                 | N.S.                                                                                    | 0e+00                                                                                | N.S.                                                                                   | 1e-117                                                                                | N.S.                                                                                    | 9e-04                                                     | 4e-04                                                       | 5e-06                                                     | 2e-05                                                       | Induced- 3-day post-mating Berlin female mated to <i>tud</i> /+ male with a germline    |
| 2e-12                                                                                | 2e-09                                                                                  | 3e-13                                                                                 | 9e-11                                                                                   | 2e-02                                                                                | 6e-18                                                                                  | 2e-02                                                                                 | 2e-16                                                                                   | N.S.                                                                                 | 6e-123                                                                                 | N.S.                                                                                  | 6e-74                                                                                   | N.S.                                                                                 | 0e+00                                                                                  | N.S.                                                                                  | 9e-119                                                                                  | 1e-03                                                     | N.S.                                                        | N.S.                                                      | 3e-03                                                       | Repressed- 3-day post-mating Berlin female mated to <i>tud</i> /+ male with a germline  |
| 3e-38                                                                                | 3e-04                                                                                  | 6e-20                                                                                 | N.S.                                                                                    | 5e-40                                                                                | 2e-09                                                                                  | 1e-37                                                                                 | N.S.                                                                                    | 6e-80                                                                                | N.S.                                                                                   | 1e-135                                                                                | N.S.                                                                                    | 1e-117                                                                               | N.S.                                                                                   | 0e+00                                                                                 | N.S.                                                                                    | 3e-03                                                     | 1e-19                                                       | 5e-05                                                     | 4e-12                                                       | Induced- 3-day post-mating Berlin female mated to <i>tud</i> /+ male with no germline   |
| 6e-09                                                                                | 1e-06                                                                                  | 2e-16                                                                                 | 4e-06                                                                                   | 4e-03                                                                                | 4e-11                                                                                  | 3e-03                                                                                 | 8e-11                                                                                   | N.S.                                                                                 | 5e-111                                                                                 | N.S.                                                                                  | 6e-118                                                                                  | N.S.                                                                                 | 9e-119                                                                                 | N.S.                                                                                  | 0e+00                                                                                   | 7e-06                                                     | N.S.                                                        | N.S.                                                      | 1e-03                                                       | Repressed- 3-day post-mating Berlin female mated to <i>tud</i> /+ male with no germline |
| 2e-02                                                                                | 7e-03                                                                                  | N.S.                                                                                  | 4e-04                                                                                   | 4e-06                                                                                | N.S.                                                                                   | 4e-04                                                                                 | N.S.                                                                                    | 6e-08                                                                                | 5e-02                                                                                  | N.S.                                                                                  | 1e-02                                                                                   | 9e-04                                                                                | 1e-03                                                                                  | 3e-03                                                                                 | 7e-06                                                                                   | 1e-78                                                     | N.S.                                                        | 6e-10                                                     | N.S.                                                        | Induced- 1-day post-mating CS female mated to DJ-GFP male                               |
| 2e-15                                                                                | 4e-08                                                                                  | 6e-14                                                                                 | 1e-03                                                                                   | 7e-18                                                                                | 7e-09                                                                                  | 3e-17                                                                                 | 4e-02                                                                                   | 1e-03                                                                                | 3e-02                                                                                  | 1e-53                                                                                 | N.S.                                                                                    | 4e-04                                                                                | N.S.                                                                                   | 1e-19                                                                                 | N.S.                                                                                    | N.S.                                                      | 3e-214                                                      | N.S.                                                      | 1e-29                                                       | Repressed- 1-day post-mating CS female mated to DJ-GFP male                             |
| 3e-13                                                                                | 3e-08                                                                                  | 9e-07                                                                                 | 7e-10                                                                                   | 2e-13                                                                                | N.S.                                                                                   | 1e-08                                                                                 | 2e-03                                                                                   | 1e-09                                                                                | N.S.                                                                                   | 3e-07                                                                                 | N.S.                                                                                    | 5e-06                                                                                | N.S.                                                                                   | 5e-05                                                                                 | N.S.                                                                                    | 6e-10                                                     | N.S.                                                        | 7e-101                                                    | N.S.                                                        | Induced- 3-day post-mating CS female mated to DJ-GFP male                               |
| 2e-03                                                                                | 8e-16                                                                                  | 1e-04                                                                                 | 7e-05                                                                                   | 6e-09                                                                                | 1e-12                                                                                  | 1e-12                                                                                 | 1e-08                                                                                   | 1e-05                                                                                | 4e-03                                                                                  | 3e-26                                                                                 | N.S.                                                                                    | 2e-05                                                                                | 3e-03                                                                                  | 4e-12                                                                                 | 1e-03                                                                                   | N.S.                                                      | 1e-29                                                       | N.S.                                                      | 3e-197                                                      | Repressed- 3-day post-mating CS female mated to DJ-GFP male                             |
| Induced- 1-day post-mating <i>tud</i> /+ female with a germline mated to Berlin male | Repressed- 1-day post-mating <i>tud</i> /+ female with a germline mated to Berlin male | Induced- 1-day post-mating <i>tud</i> /+ female with no germline mated to Berlin male | Repressed- 1-day post-mating <i>tud</i> /+ female with no germline mated to Berlin male | Induced- 1-day post-mating Berlin female mated to <i>tud</i> /+ male with a germline | Repressed- 1-day post-mating Berlin female mated to <i>tud</i> /+ male with a germline | Induced- 1-day post-mating Berlin female mated to <i>tud</i> /+ male with no germline | Repressed- 1-day post-mating Berlin female mated to <i>tud</i> /+ male with no germline | Induced- 3-day post-mating <i>tud</i> /+ female with a germline mated to Berlin male | Repressed- 3-day post-mating <i>tud</i> /+ female with a germline mated to Berlin male | Induced- 3-day post-mating <i>tud</i> /+ female with no germline mated to Berlin male | Repressed- 3-day post-mating <i>tud</i> /+ female with no germline mated to Berlin male | Induced- 3-day post-mating Berlin female mated to <i>tud</i> /+ male with a germline | Repressed- 3-day post-mating Berlin female mated to <i>tud</i> /+ male with a germline | Induced- 3-day post-mating Berlin female mated to <i>tud</i> /+ male with no germline | Repressed- 3-day post-mating Berlin female mated to <i>tud</i> /+ male with no germline | Induced- 1-day post-mating CS female mated to DJ-GFP male | Repressed- 1-day post-mating CS female mated to DJ-GFP male | Induced- 3-day post-mating CS female mated to DJ-GFP male | Repressed- 3-day post-mating CS female mated to DJ-GFP male |                                                                                         |

**Figure S5: Gene list overlap.** Examination of gene list overlaps was performed in R using the package GeneOverlap. A heatmap matrix was generated which displays the *P*-value calculated using a Fisher's exact test of each overlap, and the Jaccard Similarity Index by color, where darker colors indicates more similarity. We examined the genes that were induced and repressed in the conditions presented in this study, as well as the genes induced and repressed at 1- and 3- days post-mating in Dalton *et al.* CS indicates wild-type Canton S.
